# Supplementary material for: B cell-mediated antigen presentation promotes adverse cardiac remodeling in chronic heart failure
Source: Research Square preprint supplement (doi:10.21203/rs.3.rs-4536350/v1), 2024-06-24
Supplement: Supplementary file 1 [file 89ad53bcb2581c680991a249.pdf]

a

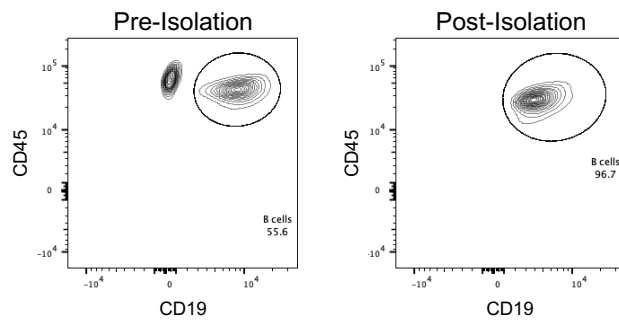

b

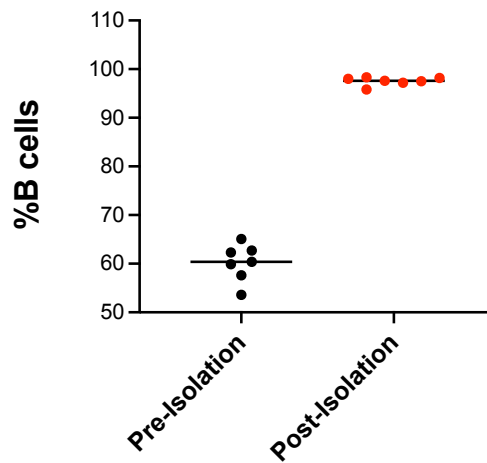

**Supplementary Figure 1. Representative splenic B cell isolation for adoptive transfer studies.** a) Representative flow cytometry analysis of splenic B cells from donor mice. b) Compiled purity data from multiple adoptive transfer experiments showing %B cells (of lymphocytes) isolated from donor spleens.
