# Supplementary material for: B cell-mediated antigen presentation promotes adverse cardiac remodeling in chronic heart failure
Source: Research Square preprint supplement (doi:10.21203/rs.3.rs-4536350/v1), 2024-06-24
Supplement: Supplementary file 1 [file 03605c0d1e4e748fe4d45048.xlsx]

## Sheet: Blood_HF vs Sham
Gene ID	Ensembl ID	Gene name	P-value	FDR step up	Ratio	Fold change	LSMean(HF)	LSMean(sham)		Genes differentially expressed in antigen processing and presentation
Xist	ENSMUSG00000086503	Xist	2.99776e-90	5.57793e-86	0.378802	-2.6399	94.9612	250.688		Gene Symbol	Gene Description
Tsc22d3	ENSMUSG00000031431	Tsc22d3	4.77677e-42	4.44407e-38	1.3297	1.3297	555.411	417.695		CD74	CD74 antigen
Pde3b	ENSMUSG00000030671	Pde3b	1.36367e-28	8.45792e-25	0.663528	-1.5071	183.974	277.266		Hspa5	heat shock protein
Gm43305	ENSMUSG00000105703	Gm43305	3.27816e-24	1.52492e-20	1.21947	1.21947	1464.01	1200.54		HSP90AB1	heat shock protein 90 alpha family class B member 1
mt-Co3	ENSMUSG00000064358	mt-Co3	5.86629e-17	2.18308e-13	1.09826	1.09826	2790.83	2541.15		HLA-A	major histocompatibility complex, class I, A
Pgap1	ENSMUSG00000073678	Pgap1	1.94186e-16	6.02205e-13	1.20868	1.20868	700.027	579.166		HLA-B	major histocompatibility complex, class I, B
mt-Atp6	ENSMUSG00000064357	mt-Atp6	9.44945e-13	1.95362e-09	1.08968	1.08968	1963.75	1802.12		Pdia3	protein disulfide isomerase family A member 3
H3f3b	ENSMUSG00000016559	H3f3b	1.11815e-12	2.08053e-09	0.893092	-1.11971	798.914	894.549
Ets1	ENSMUSG00000032035	Ets1	6.85202e-12	1.15905e-08	1.10711	1.10711	1256.5	1134.93
Cd69	ENSMUSG00000030156	Cd69	1.2176e-11	1.888e-08	1.21059	1.21059	386.63	319.372
mt-Co2	ENSMUSG00000064354	mt-Co2	2.71644e-11	3.88806e-08	1.07931	1.07931	2158.52	1999.91
H2-K1	ENSMUSG00000061232	H2-K1	5.03197e-11	6.68784e-08	0.916496	-1.09111	1242.31	1355.5
mt-Nd1	ENSMUSG00000064341	mt-Nd1	7.28486e-11	9.03662e-08	1.11336	1.11336	839.446	753.972
Ccnd3	ENSMUSG00000034165	Ccnd3	1.02488e-10	1.19188e-07	1.16888	1.16888	449.917	384.914
Fam169b	ENSMUSG00000074071	Fam169b	3.12889e-10	3.42466e-07	0.821459	-1.21735	212.855	259.118
Gm26917	ENSMUSG00000097971	.	5.75176e-10	5.94572e-07	0.820879	-1.21821	234.766	285.993
Man1a	ENSMUSG00000003746	Man1a	6.27301e-10	6.14325e-07	0.894029	-1.11853	1173.06	1312.1
4933406I18Rik	ENSMUSG00000087475	4933406I18Rik	1.58531e-09	1.47489e-06	0.724671	-1.37994	110.663	152.708
Junb	ENSMUSG00000052837	Junb	2.5026e-09	2.12056e-06	0.855463	-1.16896	310.849	363.369
Vim	ENSMUSG00000026728	Vim	2.50724e-09	2.12056e-06	1.18045	1.18045	479.099	405.863
Gm20513	ENSMUSG00000092415	Gm20513	3.25475e-09	2.63309e-06	0.814526	-1.22771	147.209	180.73
Apbb1ip	ENSMUSG00000026786	Apbb1ip	4.72203e-09	3.66095e-06	1.12322	1.12322	669.678	596.215
Ikbkb	ENSMUSG00000031537	Ikbkb	9.2689e-09	6.89866e-06	1.16533	1.16533	277.577	238.195
Foxn3	ENSMUSG00000033713	Foxn3	2.21528e-08	1.58537e-05	1.10848	1.10848	833.252	751.71
H2-D1	ENSMUSG00000073411	H2-D1	2.40392e-08	1.65666e-05	0.942041	-1.06152	1976.57	2098.18
mt-Nd2	ENSMUSG00000064345	mt-Nd2	2.5906e-08	1.72155e-05	1.10371	1.10371	693.438	628.282
Snx5	ENSMUSG00000027423	Snx5	7.04679e-08	4.39669e-05	0.880533	-1.13568	319.814	363.205
Hsp90ab1	ENSMUSG00000023944	Hsp90ab1	7.08876e-08	4.39669e-05	1.09429	1.09429	985.446	900.537
Crip1	ENSMUSG00000006360	Crip1	7.42745e-08	4.45815e-05	1.14493	1.14493	560.86	489.865
Pde4b	ENSMUSG00000028525	Pde4b	1.38037e-07	8.02644e-05	0.901216	-1.10961	551.004	611.401
Tagln2	ENSMUSG00000026547	Tagln2	1.68607e-07	9.50689e-05	1.18298	1.18298	278.033	235.027
Tagap	ENSMUSG00000033450	Tagap	2.81975e-07	0.000154315	1.20638	1.20638	165.98	137.586
mt-Cytb	ENSMUSG00000064370	mt-Cytb	3.19684e-07	0.000169953	1.06283	1.06283	2486.02	2339.06
Prkcb	ENSMUSG00000052889	Prkcb	3.46775e-07	0.000179234	1.08503	1.08503	1126.19	1037.93
Slfn2	ENSMUSG00000072620	Slfn2	3.95575e-07	0.000197734	0.881536	-1.13438	293.147	332.541
Rhoh	ENSMUSG00000029204	Rhoh	4.0941e-07	0.000197734	0.875386	-1.14235	270.106	308.556
Klf3	ENSMUSG00000029178	Klf3	4.14447e-07	0.000197734	1.13925	1.13925	374.752	328.945
Mef2c	ENSMUSG00000005583	Mef2c	4.44642e-07	0.000206382	0.926877	-1.07889	1673.08	1805.07
Dnaja1	ENSMUSG00000028410	Dnaja1	4.54757e-07	0.000206382	1.14056	1.14056	299.848	262.896
mt-Co1	ENSMUSG00000064351	mt-Co1	4.74688e-07	0.000210298	1.05357	1.05357	3522.68	3343.56
Stt3b	ENSMUSG00000032437	Stt3b	2.01823e-06	0.000868587	1.15625	1.15625	325.002	281.082
Atp2b1	ENSMUSG00000019943	Atp2b1	2.05395e-06	0.000868587	1.13781	1.13781	380.56	334.468
Shisa5	ENSMUSG00000025647	Shisa5	2.26901e-06	0.000938211	0.933877	-1.0708	939.04	1005.53
Apoe	ENSMUSG00000002985	Apoe	2.37593e-06	0.000961063	0.81762	-1.22306	135.921	166.24
Stat4	ENSMUSG00000062939	Stat4	4.6101e-06	0.00179322	0.87615	-1.14136	287.547	328.194
Malat1	ENSMUSG00000092341	Malat1	4.62591e-06	0.00179322	0.958484	-1.04331	25943.3	27067
Dennd4a	ENSMUSG00000053641	Dennd4a	8.07845e-06	0.00306767	1.10858	1.10858	699.995	631.436
Ly6e	ENSMUSG00000022587	Ly6e	9.2411e-06	0.00343898	0.952748	-1.0496	2251	2362.64
Igkv6-15	ENSMUSG00000094797	Igkv6-15	1.07821e-05	0.00393376	0.817328	-1.2235	261.681	320.166
Rabgap1l	ENSMUSG00000026721	Rabgap1l	1.25804e-05	0.00450159	1.08872	1.08872	730.208	670.703
H2-Q4	ENSMUSG00000035929	H2-Q4	1.40757e-05	0.00494164	0.881869	-1.13396	177.294	201.043
Itga4	ENSMUSG00000027009	Itga4	1.69565e-05	0.00584277	1.09142	1.09142	713.127	653.394
Coro1a	ENSMUSG00000030707	Coro1a	2.08359e-05	0.00704897	1.06147	1.06147	1186.47	1117.76
Gm19951	ENSMUSG00000113136	Gm19951	2.1673e-05	0.00720124	1.12286	1.12286	337.181	300.288
Kmt2a	ENSMUSG00000002028	Kmt2a	3.13269e-05	0.010214	0.896011	-1.11606	273.978	305.775
Ccr7	ENSMUSG00000037944	Ccr7	3.18381e-05	0.010214	1.10086	1.10086	482.352	438.158
Cytip	ENSMUSG00000026832	Cytip	3.33424e-05	0.0105153	1.08233	1.08233	612.151	565.586
Sp100	ENSMUSG00000026222	Sp100	3.74745e-05	0.0116215	0.929557	-1.07578	676.728	728.012
Card11	ENSMUSG00000036526	Card11	4.23764e-05	0.0129262	1.11908	1.11908	283.658	253.475
Iqgap1	ENSMUSG00000030536	Iqgap1	4.57764e-05	0.0137381	1.08013	1.08013	555.272	514.08
Akap13	ENSMUSG00000066406	Akap13	4.69494e-05	0.0138665	1.07332	1.07332	905.212	843.376
Mycbp2	ENSMUSG00000033004	Mycbp2	5.13279e-05	0.0149228	0.919844	-1.08714	530.108	576.302
Stk4	ENSMUSG00000018209	Stk4	6.03658e-05	0.0172423	1.09324	1.09324	387.881	354.799
Limd2	ENSMUSG00000040699	Limd2	6.11592e-05	0.0172423	0.93158	-1.07345	628.071	674.2
Ddx5	ENSMUSG00000020719	Ddx5	6.91041e-05	0.0191913	0.947379	-1.05554	1184.38	1250.17
Ly6a	ENSMUSG00000075602	Ly6a	7.26567e-05	0.0197257	0.891653	-1.12151	272.543	305.66
Ppp1r10	ENSMUSG00000039220	Ppp1r10	7.31763e-05	0.0197257	0.888934	-1.12494	191.817	215.783
Zfp36	ENSMUSG00000044786	Zfp36	7.42085e-05	0.0197257	0.912268	-1.09617	332.778	364.781
Jund	ENSMUSG00000071076	Jund	7.61117e-05	0.0199466	1.06965	1.06965	921.714	861.7
Add3	ENSMUSG00000025026	Add3	9.04364e-05	0.0233715	1.06901	1.06901	983.154	919.684
Hnrnpa0	ENSMUSG00000007836	Hnrnpa0	9.26466e-05	0.0236147	1.11628	1.11628	215.339	192.907
Hipk1	ENSMUSG00000008730	Hipk1	0.000101267	0.0254631	1.12304	1.12304	216.427	192.714
Id3	ENSMUSG00000007872	Id3	0.000104793	0.0259986	0.868767	-1.15106	144.862	166.745
Limd1	ENSMUSG00000025239	Limd1	0.000106205	0.0260021	1.11867	1.11867	215.028	192.218
Cyth1	ENSMUSG00000017132	Cyth1	0.000108644	0.0262537	0.908088	-1.10121	301.118	331.596
Rap1b	ENSMUSG00000052681	Rap1b	0.000111466	0.0265904	1.08783	1.08783	402.004	369.547
Zcchc7	ENSMUSG00000035649	Zcchc7	0.000122263	0.0287968	0.922007	-1.08459	595.574	645.954
mt-Atp8	ENSMUSG00000064356	mt-Atp8	0.000130279	0.0303012	1.1065	1.1065	258.834	233.923
Satb1	ENSMUSG00000023927	Satb1	0.000150649	0.0346066	0.897462	-1.11425	292.676	326.116
Fcrl1	ENSMUSG00000059994	Fcrl1	0.000219427	0.0497913	0.90699	-1.10255	274.266	302.392
Hspa5	ENSMUSG00000026864	Hspa5	0.000261424	0.0586062	0.907945	-1.10139	272.579	300.216
Rapgef4	ENSMUSG00000049044	Rapgef4	0.000283641	0.06229	0.877129	-1.14008	171.546	195.576
Ppp3cc	ENSMUSG00000022092	Ppp3cc	0.000284551	0.06229	0.904874	-1.10513	243.944	269.589
Eef1a1	ENSMUSG00000037742	Eef1a1	0.000293093	0.0627165	0.962381	-1.03909	2987.25	3104.02
B4galnt1	ENSMUSG00000006731	B4galnt1	0.000293241	0.0627165	1.10292	1.10292	272.567	247.132
Dennd1a	ENSMUSG00000035392	Dennd1a	0.00033687	0.0703463	0.892633	-1.12028	182.243	204.164
Sp140	ENSMUSG00000070031	Sp140	0.000339799	0.0703463	0.899894	-1.11124	205.762	228.651
Ier2	ENSMUSG00000053560	Ier2	0.000340257	0.0703463	0.893972	-1.1186	164.499	184.009
Actr2	ENSMUSG00000020152	Actr2	0.000356063	0.0728051	1.07807	1.07807	421.559	391.033
Ddx24	ENSMUSG00000041645	Ddx24	0.000365334	0.0732209	0.900551	-1.11043	193.266	214.609
Mat2a	ENSMUSG00000053907	Mat2a	0.000365967	0.0732209	1.12027	1.12027	178.635	159.457
Srsf11	ENSMUSG00000055436	Srsf11	0.000383831	0.0759781	0.917345	-1.0901	292.205	318.534
Lbh	ENSMUSG00000024063	Lbh	0.000391684	0.0766924	1.09478	1.09478	303.554	277.274
Immp2l	ENSMUSG00000056899	Immp2l	0.000395683	0.0766924	0.912951	-1.09535	624.591	684.146
Kdm6a	ENSMUSG00000037369	Kdm6a	0.000400359	0.0767988	0.883228	-1.13221	138.086	156.343
Btla	ENSMUSG00000052013	Btla	0.000435134	0.0826177	0.934839	-1.0697	719.95	770.132
Ezr	ENSMUSG00000052397	Ezr	0.000451462	0.0844183	1.07595	1.07595	515.972	479.552
Calm2	ENSMUSG00000036438	Calm2	0.000453691	0.0844183	0.910884	-1.09783	244.782	268.73
Trim34a	ENSMUSG00000056144	Trim34a	0.000462629	0.0852292	0.906192	-1.10352	225.955	249.346
Jak1	ENSMUSG00000028530	Jak1	0.000525072	0.0956154	0.937679	-1.06646	579.089	617.577
Tnrc6b	ENSMUSG00000047888	Tnrc6b	0.000529284	0.0956154	0.922721	-1.08375	382.578	414.619
Evl	ENSMUSG00000021262	Evl	0.000678348	0.121279	0.905915	-1.10386	189.823	209.537
Sell	ENSMUSG00000026581	Sell	0.000684383	0.121279	0.940148	-1.06366	659.044	701
mt-Nd4	ENSMUSG00000064363	mt-Nd4	0.00073287	0.127762	1.06611	1.06611	593.632	556.821
Gm42031	ENSMUSG00000110386	Gm42031	0.000734696	0.127762	1.12997	1.12997	145.311	128.597
Laptm5	ENSMUSG00000028581	Laptm5	0.000770028	0.132666	0.942957	-1.06049	644.304	683.28
Malt1	ENSMUSG00000032688	Malt1	0.000815005	0.139012	1.07751	1.07751	492.151	456.749
H2-Q6	ENSMUSG00000073409	H2-Q6	0.000821806	0.139012	0.902917	-1.10752	172.349	190.881
AY036118	ENSMUSG00000105361	AY036118	0.000914663	0.153326	1.0986	1.0986	460.31	418.995
Etnk1	ENSMUSG00000030275	Etnk1	0.0009474	0.157395	1.07593	1.07593	424.917	394.932
Dazap2	ENSMUSG00000000346	Dazap2	0.00103622	0.170628	0.917191	-1.09029	238.161	259.663
Cacybp	ENSMUSG00000014226	Cacybp	0.00109203	0.178241	1.14133	1.14133	138.466	121.32
Map3k5	ENSMUSG00000071369	Map3k5	0.00114012	0.183004	0.900611	-1.11036	179.579	199.397
Haao	ENSMUSG00000000673	Haao	0.00114089	0.183004	0.910638	-1.09813	210.299	230.935
Rpl23	ENSMUSG00000071415	Rpl23	0.00116385	0.185092	1.0466	1.0466	1931.57	1845.58
Rabac1	ENSMUSG00000003380	Rabac1	0.00122599	0.193322	1.10573	1.10573	178.458	161.393
Cd2	ENSMUSG00000027863	Cd2	0.00131807	0.205354	1.08133	1.08133	355.456	328.721
Snx29	ENSMUSG00000071669	Snx29	0.00132437	0.205354	0.923651	-1.08266	376.563	407.69
Maml2	ENSMUSG00000031925	Maml2	0.00139438	0.214423	0.915193	-1.09267	423.787	463.057
Blk	ENSMUSG00000014453	Blk	0.00144383	0.220208	1.07788	1.07788	391.195	362.93
mt-Nd4l	ENSMUSG00000065947	mt-Nd4l	0.00152954	0.231383	1.04712	1.04712	1080.83	1032.2
Arid5b	ENSMUSG00000019947	Arid5b	0.00157464	0.236285	0.913372	-1.09484	294.964	322.94
Uty	ENSMUSG00000068457	Uty	0.00159937	0.238076	1.21408	1.21408	117.698	96.9442
Cacna1e	ENSMUSG00000004110	Cacna1e	0.00176126	0.260093	0.879124	-1.1375	175.007	199.069
St3gal1	ENSMUSG00000013846	St3gal1	0.0017881	0.261977	1.10115	1.10115	211.967	192.496
Stk17b	ENSMUSG00000026094	Stk17b	0.00186869	0.271647	0.941117	-1.06257	579.539	615.799
Mylip	ENSMUSG00000038175	Mylip	0.00190903	0.275359	0.919388	-1.08768	252.433	274.566
Rps27	ENSMUSG00000090733	Rps27	0.00195575	0.279928	1.04538	1.04538	2044.63	1955.87
Rplp2	ENSMUSG00000025508	Rplp2	0.00197867	0.281046	1.05758	1.05758	974.184	921.144
Rps5	ENSMUSG00000012848	Rps5	0.00217081	0.305107	1.04542	1.04542	1794.15	1716.2
Rara	ENSMUSG00000037992	Rara	0.00219455	0.305107	1.12838	1.12838	134.34	119.056
AI467606	ENSMUSG00000045165	AI467606	0.00219726	0.305107	1.09251	1.09251	217	198.624
Cd79b	ENSMUSG00000040592	Cd79b	0.00223988	0.308721	0.962244	-1.03924	1666.77	1732.17
Inpp4b	ENSMUSG00000037940	Inpp4b	0.00227032	0.310617	0.924488	-1.08168	699.27	756.386
Srsf2	ENSMUSG00000034120	Srsf2	0.00251023	0.34008	1.0932	1.0932	191.743	175.397
Hmgb2	ENSMUSG00000054717	Hmgb2	0.00252222	0.34008	0.892048	-1.12102	126.621	141.944
Ero1lb	ENSMUSG00000057069	.	0.00257266	0.342499	0.935732	-1.06868	481.047	514.086
Rps19	ENSMUSG00000040952	Rps19	0.00257698	0.342499	1.04977	1.04977	1203.99	1146.91
Trim30a	ENSMUSG00000030921	Trim30a	0.00261956	0.345689	0.892245	-1.12077	145.07	162.589
Rps24	ENSMUSG00000025290	Rps24	0.00268214	0.351455	1.03736	1.03736	4258.68	4105.31
Ifi213	ENSMUSG00000073491	Ifi213	0.00288228	0.375039	0.889603	-1.1241	147.323	165.605
Klf2	ENSMUSG00000055148	Klf2	0.00293286	0.37897	1.04318	1.04318	1499.41	1437.34
Rpl35	ENSMUSG00000062997	Rpl35	0.00298529	0.383085	1.05658	1.05658	946.265	895.592
Rftn1	ENSMUSG00000039316	Rftn1	0.00309653	0.394638	0.920725	-1.0861	257.89	280.095
Dpp4	ENSMUSG00000035000	Dpp4	0.00317195	0.4015	0.905929	-1.10384	169.852	187.489
Sh3glb1	ENSMUSG00000037062	Sh3glb1	0.00325635	0.409398	0.929068	-1.07635	285.979	307.813
Ppp1r16b	ENSMUSG00000037754	Ppp1r16b	0.00349321	0.43623	0.910714	-1.09804	173.508	190.518
Gm47782	ENSMUSG00000114794	Gm47782	0.00363561	0.450985	0.844798	-1.18372	140.686	166.532
B3gnt2	ENSMUSG00000051650	B3gnt2	0.00367298	0.452604	1.08335	1.08335	243.294	224.574
Zfp638	ENSMUSG00000030016	Zfp638	0.00378064	0.460639	0.922246	-1.08431	232.476	252.076
Tcp11l2	ENSMUSG00000020034	Tcp11l2	0.00381074	0.460639	1.07843	1.07843	287.607	266.692
Cxcr5	ENSMUSG00000047880	Cxcr5	0.00381246	0.460639	1.07979	1.07979	281.398	260.605
Snx8	ENSMUSG00000029560	Snx8	0.00393386	0.472241	1.08746	1.08746	215.609	198.269
Srsf7	ENSMUSG00000024097	Srsf7	0.00400075	0.475888	1.06134	1.06134	426.498	401.847
Ncoa3	ENSMUSG00000027678	Ncoa3	0.00401539	0.475888	1.08477	1.08477	242.595	223.637
Igkv12-44	ENSMUSG00000096422	Igkv12-44	0.00406206	0.478372	1.16542	1.16542	225.941	193.87
Rel	ENSMUSG00000020275	Rel	0.00408942	0.478565	0.934933	-1.0696	381.73	408.297
Dusp2	ENSMUSG00000027368	Dusp2	0.00412382	0.479575	0.906955	-1.10259	150.808	166.28
Gimap6	ENSMUSG00000047867	Gimap6	0.00442631	0.511555	0.944319	-1.05896	468.277	495.888
Pdia3	ENSMUSG00000027248	Pdia3	0.00448744	0.515418	0.924633	-1.08151	233.602	252.642
Cd37	ENSMUSG00000030798	Cd37	0.00452498	0.516542	1.03216	1.03216	1737.28	1683.16
Blnk	ENSMUSG00000061132	Blnk	0.00459401	0.520493	0.952149	-1.05026	695.011	729.94
Kynu	ENSMUSG00000026866	Kynu	0.00461554	0.520493	0.919488	-1.08756	270.864	294.582
Tnks2	ENSMUSG00000024811	Tnks2	0.00468297	0.524915	1.07765	1.07765	287.631	266.906
Tbc1d5	ENSMUSG00000023923	Tbc1d5	0.00494185	0.549568	0.922628	-1.08386	313.14	339.4
Rpl38	ENSMUSG00000057322	Rpl38	0.00496197	0.549568	1.04514	1.04514	1662.19	1590.4
Tpt1	ENSMUSG00000060126	Tpt1	0.00508693	0.560074	1.04343	1.04343	1303.95	1249.68
Gls	ENSMUSG00000026103	Gls	0.00516119	0.564908	0.920712	-1.08612	196.398	213.311
Fchsd2	ENSMUSG00000030691	Fchsd2	0.00529739	0.576424	0.952207	-1.05019	1386	1455.57
Eif2s3y	ENSMUSG00000069049	Eif2s3y	0.00540104	0.584286	1.1647	1.1647	121.738	104.524
Arf4	ENSMUSG00000021877	Arf4	0.00554962	0.593754	0.919943	-1.08702	162.05	176.152
Fry	ENSMUSG00000056602	Fry	0.00557879	0.593754	1.08046	1.08046	326.747	302.415
Morf4l1	ENSMUSG00000062270	Morf4l1	0.00558429	0.593754	0.942595	-1.0609	390.877	414.682
Jarid2	ENSMUSG00000038518	Jarid2	0.00566752	0.59918	0.915659	-1.09211	180.714	197.359
Setbp1	ENSMUSG00000024548	Setbp1	0.00596567	0.627137	1.09015	1.09015	314.666	288.645
Gimap1	ENSMUSG00000090019	Gimap1	0.00609774	0.63742	1.05546	1.05546	521.059	493.679
Zeb2	ENSMUSG00000026872	Zeb2	0.00614156	0.638413	0.896096	-1.11595	185.62	207.143
Fryl	ENSMUSG00000070733	Fryl	0.00620757	0.641691	0.918377	-1.08888	177.767	193.566
Ppp3ca	ENSMUSG00000028161	Ppp3ca	0.00625416	0.642935	0.952929	-1.0494	969.84	1017.75
Bcar3	ENSMUSG00000028121	Bcar3	0.00659949	0.674238	0.919829	-1.08716	250.86	272.725
Gnas	ENSMUSG00000027523	Gnas	0.0066522	0.674238	1.04978	1.04978	627.953	598.177
Slc9a7	ENSMUSG00000037341	Slc9a7	0.00666737	0.674238	0.939658	-1.06422	490.505	522.004
Ddx3y	ENSMUSG00000069045	Ddx3y	0.00680784	0.684721	1.18985	1.18985	114.384	96.1324
Celf2	ENSMUSG00000002107	Celf2	0.00688332	0.685397	1.05873	1.05873	532.734	503.183
Rps21	ENSMUSG00000039001	Rps21	0.00689979	0.685397	1.04223	1.04223	1734.85	1664.56
Rpl13a	ENSMUSG00000074129	Rpl13a	0.00692506	0.685397	1.04288	1.04288	1141.17	1094.25
Sesn3	ENSMUSG00000032009	Sesn3	0.00717812	0.706684	1.08414	1.08414	206.614	190.579
Dynll1	ENSMUSG00000009013	Dynll1	0.0073463	0.719435	1.08006	1.08006	234.43	217.053
Gimap8	ENSMUSG00000064262	Gimap8	0.00747697	0.728397	1.07482	1.07482	265.49	247.009
Grk6	ENSMUSG00000074886	Grk6	0.00759094	0.73346	1.06459	1.06459	344.256	323.37
Srrm1	ENSMUSG00000028809	Srrm1	0.00760777	0.73346	1.07269	1.07269	268.792	250.577
Utrn	ENSMUSG00000019820	Utrn	0.00769798	0.738331	0.900379	-1.11064	132.402	147.051
Mbnl1	ENSMUSG00000027763	Mbnl1	0.00879347	0.839078	0.957996	-1.04385	923.612	964.109
Myadm	ENSMUSG00000068566	Myadm	0.00904	0.8582	1.13297	1.13297	133.037	117.423
Grap2	ENSMUSG00000042351	Grap2	0.00926301	0.871408	0.930202	-1.07503	272.258	292.687
Abhd17b	ENSMUSG00000047368	Abhd17b	0.00930404	0.871408	0.945974	-1.05711	456.985	483.084
Bptf	ENSMUSG00000040481	Bptf	0.00931962	0.871408	0.938334	-1.06572	313.541	334.146
Ubac2	ENSMUSG00000041765	Ubac2	0.00945523	0.879667	0.927789	-1.07783	203.46	219.295
Rpl24	ENSMUSG00000098274	Rpl24	0.00978069	0.905419	1.04905	1.04905	905.636	863.29
Cpm	ENSMUSG00000020183	Cpm	0.00984867	0.907199	1.09192	1.09192	210.484	192.764
Myo1e	ENSMUSG00000032220	Myo1e	0.0100383	0.918734	0.931258	-1.07382	318.631	342.151
AC149090.1	ENSMUSG00000095041	.	0.0101105	0.918734	1.08062	1.08062	275.092	254.57
Igkv6-23	ENSMUSG00000095630	Igkv6-23	0.010122	0.918734	0.867018	-1.15338	164.59	189.834
Lncpint	ENSMUSG00000044471	Lncpint	0.0103682	0.936511	0.926891	-1.07888	260.4	280.94
Rps12	ENSMUSG00000061983	Rps12	0.0108264	0.966839	1.05036	1.05036	803.356	764.84
Arhgef6	ENSMUSG00000031133	Arhgef6	0.0109443	0.966839	0.922377	-1.08416	166.321	180.318
Man2b1	ENSMUSG00000005142	Man2b1	0.0110775	0.966839	1.07887	1.07887	190.77	176.824
Rpl13	ENSMUSG00000000740	Rpl13	0.0112867	0.966839	1.03068	1.03068	3075	2983.45
Vps13b	ENSMUSG00000037646	Vps13b	0.0112945	0.966839	0.931257	-1.07382	264.135	283.633
Nxpe3	ENSMUSG00000075033	Nxpe3	0.0113831	0.966839	0.925043	-1.08103	182.134	196.892
Rps29	ENSMUSG00000034892	Rps29	0.0114683	0.966839	1.04104	1.04104	1473.84	1415.74
Trim7	ENSMUSG00000040350	Trim7	0.0120217	0.966839	1.08372	1.08372	197.714	182.439
Ubb	ENSMUSG00000019505	Ubb	0.0123722	0.966839	0.965415	-1.03582	1327	1374.54
Dcaf8	ENSMUSG00000026554	Dcaf8	0.0123769	0.966839	0.924729	-1.0814	153.977	166.51
Ahnak	ENSMUSG00000069833	Ahnak	0.0130199	0.966839	1.13123	1.13123	137.314	121.384
Lsp1	ENSMUSG00000018819	Lsp1	0.0134711	0.966839	1.04839	1.04839	564.578	538.519
Slc28a2	ENSMUSG00000027219	Slc28a2	0.0135341	0.966839	0.924977	-1.08111	169.845	183.621
Trim14	ENSMUSG00000039853	Trim14	0.0136892	0.966839	0.923087	-1.08332	163.774	177.42
Hivep2	ENSMUSG00000015501	Hivep2	0.0136898	0.966839	0.932852	-1.07198	327.882	351.484
Dennd6a	ENSMUSG00000040818	Dennd6a	0.0137312	0.966839	1.07729	1.07729	219.438	203.695
Zup1	ENSMUSG00000039531	Zup1	0.014002	0.966839	0.933997	-1.07067	268.455	287.426
5031425E22Rik	ENSMUSG00000073147	5031425E22Rik	0.014168	0.966839	0.930695	-1.07447	195.747	210.323
Rpl27	ENSMUSG00000063316	Rpl27	0.0151274	0.966839	1.04795	1.04795	773.599	738.2
2023-03-01	ENSMUSG00000036469	.	0.0152816	0.966839	1.0411	1.0411	1277.97	1227.52
Dapp1	ENSMUSG00000028159	Dapp1	0.0152931	0.966839	1.06993	1.06993	268.299	250.762
Ighd	ENSMUSG00000104213	Ighd	0.015565	0.966839	0.956316	-1.04568	597.284	624.567
Eif1	ENSMUSG00000035530	Eif1	0.0159321	0.966839	0.963975	-1.03737	959.05	994.892
H2-Q7	ENSMUSG00000060550	H2-Q7	0.0163774	0.966839	0.923977	-1.08228	150.313	162.681
Pml	ENSMUSG00000036986	Pml	0.017019	0.966839	0.931325	-1.07374	201.561	216.424
Serpinb1a	ENSMUSG00000044734	Serpinb1a	0.0171487	0.966839	1.06151	1.06151	352.918	332.467
Ighm	ENSMUSG00000076617	Ighm	0.017497	0.966839	0.962656	-1.03879	794.08	824.885
Srsf3	ENSMUSG00000071172	Srsf3	0.0176549	0.966839	1.06796	1.06796	227.878	213.376
Rapgef6	ENSMUSG00000037533	Rapgef6	0.0181925	0.966839	0.950356	-1.05224	451.608	475.199
Macf1	ENSMUSG00000028649	Macf1	0.0182848	0.966839	0.963987	-1.03736	1086.39	1126.98
Snx2	ENSMUSG00000034484	Snx2	0.0183019	0.966839	0.961573	-1.03996	732.617	761.894
Rpl32	ENSMUSG00000057841	Rpl32	0.0188595	0.966839	1.03919	1.03919	1377.81	1325.85
Kmt2e	ENSMUSG00000029004	Kmt2e	0.018918	0.966839	1.04522	1.04522	610.251	583.852
Aldh2	ENSMUSG00000029455	Aldh2	0.0193862	0.966839	0.938569	-1.06545	236.493	251.972
Rps10	ENSMUSG00000052146	Rps10	0.0195696	0.966839	1.03467	1.03467	1906.99	1843.1
Thrap3	ENSMUSG00000043962	Thrap3	0.0199007	0.966839	0.938129	-1.06595	224.285	239.077
Rps17	ENSMUSG00000061787	Rps17	0.0203687	0.966839	1.06913	1.06913	240.601	225.045
Add1	ENSMUSG00000029106	Add1	0.0203889	0.966839	1.05875	1.05875	320.421	302.64
Pdia4	ENSMUSG00000025823	Pdia4	0.0207366	0.966839	0.926825	-1.07895	147.223	158.846
Smg1	ENSMUSG00000030655	Smg1	0.0208924	0.966839	0.94387	-1.05947	304.349	322.448
Itgb7	ENSMUSG00000001281	Itgb7	0.0211279	0.966839	1.06943	1.06943	208.409	194.879
Rplp1	ENSMUSG00000007892	Rplp1	0.0212715	0.966839	1.03942	1.03942	1141.22	1097.94
Sub1	ENSMUSG00000022205	Sub1	0.0218072	0.966839	1.06324	1.06324	287.162	270.083
Map3k1	ENSMUSG00000021754	Map3k1	0.0218365	0.966839	1.06165	1.06165	291.033	274.132
Epb41	ENSMUSG00000028906	Epb41	0.0221018	0.966839	0.930091	-1.07516	189.167	203.386
Pik3r1	ENSMUSG00000041417	Pik3r1	0.0222614	0.966839	1.07361	1.07361	190.126	177.089
Rps20	ENSMUSG00000028234	Rps20	0.0224545	0.966839	1.03085	1.03085	2933.77	2845.97
Dok3	ENSMUSG00000035711	Dok3	0.0229529	0.966839	0.942799	-1.06067	256.814	272.395
Lnpep	ENSMUSG00000023845	Lnpep	0.0233302	0.966839	0.94749	-1.05542	344.043	363.109
Cog5	ENSMUSG00000035933	Cog5	0.0234154	0.966839	0.924509	-1.08166	154.905	167.554
Tgfb1	ENSMUSG00000002603	Tgfb1	0.0236853	0.966839	1.05577	1.05577	342.013	323.947
Rpl41	ENSMUSG00000093674	Rpl41	0.0239957	0.966839	1.03234	1.03234	2251.2	2180.67
Zfp644	ENSMUSG00000049606	Zfp644	0.0240459	0.966839	0.93064	-1.07453	160.908	172.9
Ankrd12	ENSMUSG00000034647	Ankrd12	0.0241486	0.966839	0.936939	-1.0673	232.828	248.498
Itm2b	ENSMUSG00000022108	Itm2b	0.02429	0.966839	0.957447	-1.04444	503.921	526.318
Sorl1	ENSMUSG00000049313	Sorl1	0.0243464	0.966839	1.06062	1.06062	322.107	303.696
Rps15a	ENSMUSG00000008683	Rps15a	0.0243623	0.966839	1.03468	1.03468	1875.64	1812.78
Lyst	ENSMUSG00000019726	Lyst	0.0244975	0.966839	1.06999	1.06999	254.813	238.147
Pak2	ENSMUSG00000022781	Pak2	0.0253893	0.966839	1.05473	1.05473	348.046	329.985
Ap1s3	ENSMUSG00000054702	Ap1s3	0.0254324	0.966839	1.08019	1.08019	155.389	143.853
BE692007	ENSMUSG00000099757	BE692007	0.0256563	0.966839	0.958182	-1.04364	724.813	756.446
Crlf3	ENSMUSG00000017561	Crlf3	0.0260512	0.966839	1.04161	1.04161	657.386	631.124
Mgrn1	ENSMUSG00000022517	Mgrn1	0.026169	0.966839	1.07257	1.07257	158.371	147.655
Rpl27a	ENSMUSG00000046364	Rpl27a	0.0263276	0.966839	1.03621	1.03621	1220.89	1178.23
mt-Nd3	ENSMUSG00000064360	mt-Nd3	0.0264143	0.966839	1.07286	1.07286	159.493	148.662
Psmb8	ENSMUSG00000024338	Psmb8	0.0264972	0.966839	0.948472	-1.05433	332.326	350.38
Crebrf	ENSMUSG00000048249	Crebrf	0.0265785	0.966839	1.06454	1.06454	235.816	221.518
Dipk1a	ENSMUSG00000029270	Dipk1a	0.0266585	0.966839	0.95178	-1.05066	452.073	474.977
Fcrla	ENSMUSG00000038421	Fcrla	0.027196	0.966839	0.945148	-1.05804	278.296	294.447
Hint1	ENSMUSG00000020267	Hint1	0.0272299	0.966839	1.07321	1.07321	180.328	168.027
Acap1	ENSMUSG00000001588	Acap1	0.0273442	0.966839	1.06493	1.06493	210.92	198.061
Ifi203	ENSMUSG00000039997	Ifi203	0.0273831	0.966839	0.950235	-1.05237	417.508	439.373
Fam168b	ENSMUSG00000037503	Fam168b	0.0274399	0.966839	1.06943	1.06943	173.596	162.325
Rps7	ENSMUSG00000061477	Rps7	0.0275228	0.966839	1.03164	1.03164	2169.65	2103.11
Cd86	ENSMUSG00000022901	Cd86	0.0276046	0.966839	0.895567	-1.11661	109.674	122.464
Stat1	ENSMUSG00000026104	Stat1	0.027641	0.966839	0.930766	-1.07438	247.235	265.626
Tsc22d4	ENSMUSG00000029723	Tsc22d4	0.0278175	0.966839	1.06137	1.06137	255.616	240.836
Itch	ENSMUSG00000027598	Itch	0.0279076	0.966839	0.939107	-1.06484	229.662	244.554
Igkv1-110	ENSMUSG00000093861	Igkv1-110	0.0281667	0.966839	1.09895	1.09895	369.614	336.333
Cybb	ENSMUSG00000015340	Cybb	0.028264	0.966839	0.936366	-1.06796	241.25	257.645
Slc10a7	ENSMUSG00000031684	Slc10a7	0.0284614	0.966839	0.924661	-1.08148	143.394	155.077
Rhoq	ENSMUSG00000024143	Rhoq	0.0284917	0.966839	1.08682	1.08682	140.233	129.03
Rsbn1l	ENSMUSG00000039968	Rsbn1l	0.0287477	0.966839	0.938246	-1.06582	190.853	203.415
Dennd5b	ENSMUSG00000030313	Dennd5b	0.0287732	0.966839	0.937589	-1.06656	262.92	280.421
Trip12	ENSMUSG00000026219	Trip12	0.0288221	0.966839	0.938303	-1.06575	207.088	220.704
Actb	ENSMUSG00000029580	Actb	0.028987	0.966839	1.02298	1.02298	4105.78	4013.56
9930111J21Rik2	ENSMUSG00000069892	9930111J21Rik2	0.0289926	0.966839	0.93358	-1.07115	163.587	175.226
Snx30	ENSMUSG00000028385	Snx30	0.0292666	0.966839	1.05986	1.05986	270.988	255.684
Psmb9	ENSMUSG00000096727	Psmb9	0.0294802	0.966839	0.93573	-1.06868	165.694	177.075
Pik3cd	ENSMUSG00000039936	Pik3cd	0.0294992	0.966839	0.931453	-1.07359	154.632	166.012
Trim12c	ENSMUSG00000057143	Trim12c	0.0296375	0.966839	0.926811	-1.07897	141.418	152.586
St6galnac3	ENSMUSG00000052544	St6galnac3	0.0299848	0.966839	0.915557	-1.09223	179.135	195.656
Rpl30	ENSMUSG00000058600	Rpl30	0.0300044	0.966839	1.03228	1.03228	1875.5	1816.86
Psma3	ENSMUSG00000060073	Psma3	0.0306382	0.966839	0.939702	-1.06417	185.262	197.15
Ddx6	ENSMUSG00000032097	Ddx6	0.0307212	0.966839	1.04657	1.04657	459.305	438.867
Pnrc1	ENSMUSG00000040128	Pnrc1	0.0307331	0.966839	0.950385	-1.05221	326.77	343.829
Zbtb20	ENSMUSG00000022708	Zbtb20	0.0310492	0.966839	0.952159	-1.05024	573.493	602.308
Tax1bp1	ENSMUSG00000004535	Tax1bp1	0.0310717	0.966839	0.953987	-1.04823	391.11	409.975
Rpsa	ENSMUSG00000032518	Rpsa	0.0316767	0.966839	0.974284	-1.02639	2607.95	2676.78
Sypl	ENSMUSG00000020570	Sypl	0.0320791	0.966839	0.94184	-1.06175	218.091	231.558
Tmcc1	ENSMUSG00000030126	Tmcc1	0.0322355	0.966839	0.924614	-1.08153	158.956	171.916
Abca1	ENSMUSG00000015243	Abca1	0.0326356	0.966839	0.928037	-1.07754	159.005	171.335
mt-Nd5	ENSMUSG00000064367	mt-Nd5	0.0334128	0.966839	1.04168	1.04168	587.099	563.609
Cdk12	ENSMUSG00000003119	Cdk12	0.0334374	0.966839	0.935159	-1.06934	162.5	173.768
Arl5c	ENSMUSG00000038352	Arl5c	0.0337083	0.966839	0.912881	-1.09543	121.169	132.732
Wasf2	ENSMUSG00000028868	Wasf2	0.0339362	0.966839	1.05001	1.05001	349.096	332.469
Ucp2	ENSMUSG00000033685	Ucp2	0.0341867	0.966839	1.04491	1.04491	497.989	476.585
Pten	ENSMUSG00000013663	Pten	0.0342319	0.966839	1.04816	1.04816	385.365	367.66
Snx9	ENSMUSG00000002365	Snx9	0.0357849	0.966839	0.951181	-1.05132	332.333	349.39
Pcbp1	ENSMUSG00000051695	Pcbp1	0.0361392	0.966839	1.0566	1.0566	252.21	238.7
Gmfg	ENSMUSG00000060791	Gmfg	0.0363907	0.966839	0.944928	-1.05828	246.243	260.594
Reep5	ENSMUSG00000005873	Reep5	0.0366626	0.966839	1.06651	1.06651	190.205	178.343
Slc4a7	ENSMUSG00000021733	Slc4a7	0.0367148	0.966839	0.943789	-1.05956	282.18	298.987
Gramd3	ENSMUSG00000001700	Gramd3	0.0370475	0.966839	0.937665	-1.06648	183.757	195.974
Cnot6l	ENSMUSG00000034724	Cnot6l	0.0371483	0.966839	0.943625	-1.05974	230.08	243.825
Sptbn1	ENSMUSG00000020315	Sptbn1	0.0372432	0.966839	1.05588	1.05588	303.87	287.787
Hdac8	ENSMUSG00000067567	Hdac8	0.0377309	0.966839	0.912786	-1.09555	132.638	145.311
Arhgap25	ENSMUSG00000030047	Arhgap25	0.0379964	0.966839	0.941304	-1.06236	205.852	218.688
Oaz1	ENSMUSG00000035242	Oaz1	0.0382156	0.966839	1.04017	1.04017	603.835	580.517
Map2k1	ENSMUSG00000004936	Map2k1	0.0387922	0.966839	0.934326	-1.07029	141.099	151.017
Ktn1	ENSMUSG00000021843	Ktn1	0.0390162	0.966839	0.943225	-1.06019	227.519	241.214
Vps37b	ENSMUSG00000066278	Vps37b	0.0390925	0.966839	0.907135	-1.10237	112.188	123.673
Pbrm1	ENSMUSG00000042323	Pbrm1	0.0396906	0.966839	1.06655	1.06655	183.29	171.854
Rpl7a	ENSMUSG00000062647	Rpl7a	0.0403679	0.966839	1.03994	1.03994	643.749	619.026
Capza2	ENSMUSG00000015733	Capza2	0.040471	0.966839	1.06219	1.06219	190.211	179.074
Tmem163	ENSMUSG00000026347	Tmem163	0.0408739	0.966839	0.949898	-1.05274	478.821	504.077
R3hdm1	ENSMUSG00000056211	R3hdm1	0.0421653	0.966839	0.937812	-1.06631	178.988	190.857
Scaper	ENSMUSG00000034007	Scaper	0.0424281	0.966839	0.932388	-1.07251	181.944	195.137
H2-Ke6	ENSMUSG00000073422	H2-Ke6	0.0430322	0.966839	1.07048	1.07048	147.181	137.491
Klf13	ENSMUSG00000052040	Klf13	0.0430476	0.966839	1.06015	1.06015	203.116	191.593
Atp6v0b	ENSMUSG00000033379	Atp6v0b	0.0430769	0.966839	1.05231	1.05231	294.218	279.592
Phip	ENSMUSG00000032253	Phip	0.0439797	0.966839	0.952659	-1.04969	382.45	401.456
Nrros	ENSMUSG00000052384	Nrros	0.0440308	0.966839	1.05247	1.05247	306.862	291.564
Hspe1	ENSMUSG00000073676	Hspe1	0.0440748	0.966839	1.08379	1.08379	133.714	123.376
Hsp90b1	ENSMUSG00000020048	Hsp90b1	0.0442681	0.966839	0.95466	-1.04749	390.822	409.383
Notch2	ENSMUSG00000027878	Notch2	0.0443876	0.966839	0.942958	-1.06049	229.327	243.2
Ms4a4c	ENSMUSG00000024675	Ms4a4c	0.0447067	0.966839	0.950447	-1.05214	348.71	366.89
Eif5a	ENSMUSG00000078812	Eif5a	0.0450438	0.966839	0.949335	-1.05337	269.222	283.59
Xpr1	ENSMUSG00000026469	Xpr1	0.0452018	0.966839	1.07066	1.07066	173.702	162.238
Klf6	ENSMUSG00000000078	Klf6	0.0453177	0.966839	1.06847	1.06847	198.487	185.768
Apc	ENSMUSG00000005871	Apc	0.0459522	0.966839	1.05848	1.05848	261.66	247.204
Zc3h7a	ENSMUSG00000037965	Zc3h7a	0.0462425	0.966839	1.06003	1.06003	219.816	207.367
Sh3bgrl3	ENSMUSG00000028843	Sh3bgrl3	0.046526	0.966839	1.03989	1.03989	649.904	624.972
Myo1g	ENSMUSG00000020437	Myo1g	0.0466576	0.966839	1.07413	1.07413	147.256	137.093
Smchd1	ENSMUSG00000024054	Smchd1	0.0466707	0.966839	0.957687	-1.04418	440.789	460.264
Rps15	ENSMUSG00000063457	Rps15	0.0467478	0.966839	1.04572	1.04572	450.409	430.718
Rps25	ENSMUSG00000009927	Rps25	0.0468258	0.966839	1.0551	1.0551	280.208	265.576
Acin1	ENSMUSG00000022185	Acin1	0.0468574	0.966839	0.952389	-1.04999	298.544	313.469
Psmb1	ENSMUSG00000014769	Psmb1	0.0474667	0.966839	1.06173	1.06173	177.588	167.262
Rps26	ENSMUSG00000025362	Rps26	0.0475065	0.966839	1.0317	1.0317	1601.49	1552.29
Ubc	ENSMUSG00000008348	Ubc	0.0482911	0.966839	0.948372	-1.05444	229.706	242.211
Rps8	ENSMUSG00000047675	Rps8	0.0483027	0.966839	1.02548	1.02548	3105.04	3027.89
Dusp11	ENSMUSG00000030002	Dusp11	0.048942	0.966839	1.05366	1.05366	260.791	247.51
Phlpp1	ENSMUSG00000044340	Phlpp1	0.0489704	0.966839	0.922967	-1.08346	141.401	153.203
Gm43388	ENSMUSG00000104927	Gm43388	0.0490376	0.966839	0.944309	-1.05897	318.719	337.515
2610035D17Rik	ENSMUSG00000087259	2610035D17Rik	0.049265	0.966839	1.07301	1.07301	189.132	176.264
Zmynd11	ENSMUSG00000021156	Zmynd11	0.0493325	0.966839	0.947326	-1.0556	254.568	268.723
Rhoa	ENSMUSG00000007815	Rhoa	0.0495828	0.966839	1.03564	1.03564	588.361	568.112
Gimap3	ENSMUSG00000039264	Gimap3	0.0497214	0.966839	1.04451	1.04451	422.348	404.35

## Sheet: Blood_New MI vs Sham
Gene ID	Ensembl ID	Gene name	P-value	FDR step up	Ratio	Fold change	LSMean(recentMI) (recentMI vs sham)	LSMean(sham)		Genes differentially expressed in antigen processing and presentation
Xist	ENSMUSG00000086503	Xist	0.0119795	0.813515	1.12523	1.12523	282.083	250.688		Gene Symbol	Gene Description
Tsc22d3	ENSMUSG00000031431	Tsc22d3	1.29409e-49	2.40791e-45	1.35917	1.35917	567.718	417.695		TAP2	transporter 2, ATP binding cassette subfamily B member
Pde3b	ENSMUSG00000030671	Pde3b	1.14184e-08	5.74223e-06	0.812334	-1.23102	225.233	277.266		HLA-DOB	major histocompatibility complex, class II, DO beta
Gm43305	ENSMUSG00000105703	Gm43305	1.24629e-30	5.79742e-27	1.25106	1.25106	1501.94	1200.54		HSP90AA1	heat shock protein 90 alpha family class A member 1
mt-Co3	ENSMUSG00000064358	mt-Co3	2.53573e-14	3.14549e-11	1.08875	1.08875	2766.66	2541.15		HSP90AB1	heat shock protein 90 alpha family class B member 1
Pgap1	ENSMUSG00000073678	Pgap1	3.07442e-20	7.15071e-17	1.23482	1.23482	715.168	579.166		HLA-A	major histocompatibility complex, class I, A
Adgre5	ENSMUSG00000002885	Adgre5	0.000154153	0.0278479	1.11208	1.11208	299.996	269.761		HLA-B	major histocompatibility complex, class I, B
mt-Atp6	ENSMUSG00000064357	mt-Atp6	5.45247e-16	8.45451e-13	1.10152	1.10152	1985.08	1802.12		HSPA8	heat shock protein family A (Hsp70) member 8
Ets1	ENSMUSG00000032035	Ets1	5.70983e-18	1.06243e-14	1.13518	1.13518	1288.36	1134.93
Cd69	ENSMUSG00000030156	Cd69	3.45212e-37	3.21168e-33	1.4196	1.4196	453.382	319.372
mt-Co2	ENSMUSG00000064354	mt-Co2	2.61143e-20	6.94154e-17	1.11036	1.11036	2220.63	1999.91
H2-K1	ENSMUSG00000061232	H2-K1	0.000186609	0.0315657	0.952385	-1.05	1290.95	1355.5
mt-Nd1	ENSMUSG00000064341	mt-Nd1	4.24606e-12	4.15824e-09	1.11973	1.11973	844.244	753.972
Ccnd3	ENSMUSG00000034165	Ccnd3	6.94038e-21	2.15233e-17	1.24912	1.24912	480.804	384.914
Man1a	ENSMUSG00000003746	Man1a	0.000959017	0.119761	1.0603	1.0603	1391.22	1312.1
4933406I18Rik	ENSMUSG00000087475	4933406I18Rik	3.81162e-05	0.0087559	0.802446	-1.24619	122.54	152.708
Junb	ENSMUSG00000052837	Junb	0.000137703	0.0261453	1.09958	1.09958	399.555	363.369
Vim	ENSMUSG00000026728	Vim	1.7451e-15	2.49778e-12	1.24509	1.24509	505.337	405.863
Apbb1ip	ENSMUSG00000026786	Apbb1ip	5.66906e-12	5.02306e-09	1.14484	1.14484	682.57	596.215
Ikbkb	ENSMUSG00000031537	Ikbkb	0.0344626	0.950316	1.05841	1.05841	252.109	238.195
Foxn3	ENSMUSG00000033713	Foxn3	1.1499e-05	0.00310089	1.08382	1.08382	814.718	751.71
H2-D1	ENSMUSG00000073411	H2-D1	2.85339e-11	2.30839e-08	0.931725	-1.07328	1954.92	2098.18
mt-Nd2	ENSMUSG00000064345	mt-Nd2	6.09734e-14	7.09082e-11	1.13997	1.13997	716.224	628.282
Snx5	ENSMUSG00000027423	Snx5	0.00725205	0.568488	0.940062	-1.06376	341.435	363.205
Hsp90ab1	ENSMUSG00000023944	Hsp90ab1	6.02487e-05	0.0127392	0.933973	-1.07069	841.078	900.537
Crip1	ENSMUSG00000006360	Crip1	0.00285304	0.283885	1.0781	1.0781	528.122	489.865
Tagln2	ENSMUSG00000026547	Tagln2	2.57875e-11	2.18104e-08	1.23612	1.23612	290.522	235.027
Tagap	ENSMUSG00000033450	Tagap	2.81e-09	1.58441e-06	1.24214	1.24214	170.901	137.586
mt-Cytb	ENSMUSG00000064370	mt-Cytb	4.98502e-30	1.85513e-26	1.14338	1.14338	2674.43	2339.06
Rhoh	ENSMUSG00000029204	Rhoh	5.43079e-09	2.88716e-06	0.858644	-1.16463	264.94	308.556
Klf3	ENSMUSG00000029178	Klf3	0.0336603	0.950316	1.05647	1.05647	347.519	328.945
Mef2c	ENSMUSG00000005583	Mef2c	0.00518921	0.442916	0.959151	-1.04259	1731.34	1805.07
Dnaja1	ENSMUSG00000028410	Dnaja1	0.002456	0.253882	0.921932	-1.08468	242.372	262.896
mt-Co1	ENSMUSG00000064351	mt-Co1	5.53087e-06	0.00163354	1.04803	1.04803	3504.14	3343.56
Stt3b	ENSMUSG00000032437	Stt3b	4.71717e-12	4.38862e-09	1.23181	1.23181	346.239	281.082
Atp2b1	ENSMUSG00000019943	Atp2b1	2.32608e-14	3.09153e-11	1.22635	1.22635	410.175	334.468
Shisa5	ENSMUSG00000025647	Shisa5	0.000151445	0.0277636	0.947358	-1.05557	952.596	1005.53
Apoe	ENSMUSG00000002985	Apoe	0.0432156	0.950316	0.917368	-1.09007	152.503	166.24
Malat1	ENSMUSG00000092341	Malat1	0.000928423	0.117518	1.03112	1.03112	27909.3	27067
Dennd4a	ENSMUSG00000053641	Dennd4a	6.6279e-33	4.11085e-29	1.31007	1.31007	827.223	631.436
Ly6e	ENSMUSG00000022587	Ly6e	1.82768e-05	0.00473093	0.954624	-1.04753	2255.44	2362.64
Rabgap1l	ENSMUSG00000026721	Rabgap1l	3.8773e-07	0.00014429	1.10288	1.10288	739.704	670.703
H2-Q4	ENSMUSG00000035929	H2-Q4	0.0176795	0.950316	0.934186	-1.07045	187.812	201.043
Itga4	ENSMUSG00000027009	Itga4	5.72602e-09	2.95956e-06	1.12439	1.12439	734.672	653.394
Kmt2a	ENSMUSG00000002028	Kmt2a	0.000171209	0.0295481	0.906669	-1.10294	277.237	305.775
Ccr7	ENSMUSG00000037944	Ccr7	4.75832e-07	0.000167053	1.12198	1.12198	491.605	438.158
Cytip	ENSMUSG00000026832	Cytip	1.31334e-16	2.22158e-13	1.16675	1.16675	659.896	565.586
Akap13	ENSMUSG00000066406	Akap13	7.11418e-06	0.00206834	1.08052	1.08052	911.287	843.376
Limd2	ENSMUSG00000040699	Limd2	4.09727e-06	0.00127063	0.922429	-1.08409	621.902	674.2
Ly6a	ENSMUSG00000075602	Ly6a	4.44708e-07	0.000159128	1.14977	1.14977	351.44	305.66
Id3	ENSMUSG00000007872	Id3	3.60082e-08	1.59525e-05	0.818586	-1.22162	136.495	166.745
Cyth1	ENSMUSG00000017132	Cyth1	0.00348233	0.333998	0.930823	-1.07432	308.657	331.596
Rap1b	ENSMUSG00000052681	Rap1b	0.0266349	0.950316	1.04928	1.04928	387.759	369.547
mt-Atp8	ENSMUSG00000064356	mt-Atp8	1.83064e-05	0.00473093	1.11851	1.11851	261.644	233.923
Fcrl1	ENSMUSG00000059994	Fcrl1	0.010152	0.743694	0.935285	-1.06919	282.823	302.392
Rapgef4	ENSMUSG00000049044	Rapgef4	0.00374424	0.351864	0.900749	-1.11019	176.165	195.576
Ppp3cc	ENSMUSG00000022092	Ppp3cc	0.0050208	0.436551	0.926519	-1.07931	249.779	269.589
B4galnt1	ENSMUSG00000006731	B4galnt1	0.0164668	0.950316	1.06681	1.06681	263.644	247.132
Sp140	ENSMUSG00000070031	Sp140	0.00324351	0.313436	0.917626	-1.08977	209.816	228.651
Ier2	ENSMUSG00000053560	Ier2	0.0363739	0.950316	0.936864	-1.06739	172.391	184.009
Actr2	ENSMUSG00000020152	Actr2	0.0105283	0.756368	1.05492	1.05492	412.508	391.033
Immp2l	ENSMUSG00000056899	Immp2l	3.25512e-05	0.00786599	1.11015	1.11015	759.502	684.146
Jak1	ENSMUSG00000028530	Jak1	4.28447e-05	0.00949061	0.927469	-1.0782	572.784	617.577
Tnrc6b	ENSMUSG00000047888	Tnrc6b	0.0215866	0.950316	0.94884	-1.05392	393.408	414.619
Evl	ENSMUSG00000021262	Evl	0.00012542	0.0243092	0.894791	-1.11758	187.492	209.537
mt-Nd4	ENSMUSG00000064363	mt-Nd4	0.00353225	0.337049	1.05639	1.05639	588.218	556.821
Gm42031	ENSMUSG00000110386	Gm42031	0.00727146	0.568488	1.10214	1.10214	141.733	128.597
Laptm5	ENSMUSG00000028581	Laptm5	1.17366e-10	8.39932e-08	0.893526	-1.11916	610.528	683.28
Haao	ENSMUSG00000000673	Haao	0.0173582	0.950316	0.934471	-1.07012	215.803	230.935
Rpl23	ENSMUSG00000071415	Rpl23	0.000670297	0.0884554	1.04864	1.04864	1935.34	1845.58
Cd2	ENSMUSG00000027863	Cd2	0.0172568	0.950316	1.05932	1.05932	348.221	328.721
Snx29	ENSMUSG00000071669	Snx29	0.000409767	0.0609963	0.916882	-1.09065	373.804	407.69
mt-Nd4l	ENSMUSG00000065947	mt-Nd4l	1.5987e-13	1.74983e-10	1.1109	1.1109	1146.67	1032.2
Stk17b	ENSMUSG00000026094	Stk17b	4.69901e-08	2.03336e-05	1.10808	1.10808	682.357	615.799
Mylip	ENSMUSG00000038175	Mylip	0.00478781	0.423991	0.927198	-1.07852	254.577	274.566
Rplp2	ENSMUSG00000025508	Rplp2	0.0161181	0.950316	1.04434	1.04434	961.983	921.144
Rps5	ENSMUSG00000012848	Rps5	0.00085628	0.109996	1.04926	1.04926	1800.73	1716.2
Cd79b	ENSMUSG00000040592	Cd79b	2.44406e-08	1.13691e-05	0.932314	-1.0726	1614.93	1732.17
Inpp4b	ENSMUSG00000037940	Inpp4b	0.0125085	0.834211	1.06532	1.06532	805.795	756.386
Dpp4	ENSMUSG00000035000	Dpp4	0.000409489	0.0609963	0.88841	-1.12561	166.567	187.489
Ppp1r16b	ENSMUSG00000037754	Ppp1r16b	0.004116	0.371779	0.912362	-1.09606	173.822	190.518
B3gnt2	ENSMUSG00000051650	B3gnt2	0.0282098	0.950316	1.062	1.062	238.497	224.574
Cxcr5	ENSMUSG00000047880	Cxcr5	0.000857174	0.109996	1.0914	1.0914	284.425	260.605
Igkv12-44	ENSMUSG00000096422	Igkv12-44	0.031199	0.950316	1.12179	1.12179	217.482	193.87
Cd37	ENSMUSG00000030798	Cd37	0.00263806	0.269706	0.966931	-1.0342	1627.5	1683.16
Blnk	ENSMUSG00000061132	Blnk	0.00208747	0.223227	0.948611	-1.05417	692.429	729.94
Rpl38	ENSMUSG00000057322	Rpl38	0.0416397	0.950316	1.03245	1.03245	1642.01	1590.4
Fchsd2	ENSMUSG00000030691	Fchsd2	0.0148219	0.950316	1.04319	1.04319	1518.44	1455.57
Morf4l1	ENSMUSG00000062270	Morf4l1	0.0275298	0.950316	0.954744	-1.0474	395.915	414.682
Jarid2	ENSMUSG00000038518	Jarid2	0.00197903	0.214092	0.90631	-1.10337	178.869	197.359
Setbp1	ENSMUSG00000024548	Setbp1	0.0396551	0.950316	1.06654	1.06654	307.85	288.645
Gimap1	ENSMUSG00000090019	Gimap1	0.0415321	0.950316	0.960341	-1.0413	474.1	493.679
Fryl	ENSMUSG00000070733	Fryl	0.0242659	0.950316	0.932526	-1.07236	180.505	193.566
Bcar3	ENSMUSG00000028121	Bcar3	0.00407611	0.371094	1.08963	1.08963	297.168	272.725
Mbnl1	ENSMUSG00000027763	Mbnl1	0.00623509	0.511085	0.956511	-1.04547	922.18	964.109
Grap2	ENSMUSG00000042351	Grap2	1.15032e-06	0.000394926	0.873229	-1.14517	255.583	292.687
Bptf	ENSMUSG00000040481	Bptf	0.0107565	0.761994	0.940105	-1.06371	314.133	334.146
Cpm	ENSMUSG00000020183	Cpm	0.00229607	0.240016	1.10889	1.10889	213.754	192.764
Rps12	ENSMUSG00000061983	Rps12	0.014964	0.950316	1.04775	1.04775	801.364	764.84
Man2b1	ENSMUSG00000005142	Man2b1	0.0125769	0.835779	0.927626	-1.07802	164.026	176.824
Rpl13	ENSMUSG00000000740	Rpl13	0.00267327	0.271066	1.03633	1.03633	3091.84	2983.45
Nxpe3	ENSMUSG00000075033	Nxpe3	0.00684779	0.544516	0.920301	-1.0866	181.2	196.892
Ahnak	ENSMUSG00000069833	Ahnak	1.07069e-05	0.00294557	1.24452	1.24452	151.066	121.384
Slc28a2	ENSMUSG00000027219	Slc28a2	0.0411425	0.950316	0.937684	-1.06646	172.179	183.621
Hivep2	ENSMUSG00000015501	Hivep2	2.90644e-05	0.00721068	0.888775	-1.12514	312.39	351.484
Dapp1	ENSMUSG00000028159	Dapp1	0.0063788	0.520572	1.07821	1.07821	270.374	250.762
Ighd	ENSMUSG00000104213	Ighd	0.00159374	0.179726	0.94379	-1.05956	589.46	624.567
Macf1	ENSMUSG00000028649	Macf1	4.05703e-05	0.00909509	0.938374	-1.06567	1057.52	1126.98
Snx2	ENSMUSG00000034484	Snx2	0.03219	0.950316	0.965431	-1.03581	735.556	761.894
Kmt2e	ENSMUSG00000029004	Kmt2e	0.0396054	0.950316	1.03919	1.03919	606.735	583.852
Sub1	ENSMUSG00000022205	Sub1	0.00324475	0.313436	1.08087	1.08087	291.926	270.083
Dok3	ENSMUSG00000035711	Dok3	2.08439e-10	1.38515e-07	0.846819	-1.18089	230.67	272.395
Cog5	ENSMUSG00000035933	Cog5	0.038327	0.950316	0.930789	-1.07436	155.957	167.554
Tgfb1	ENSMUSG00000002603	Tgfb1	0.00141082	0.16305	0.925135	-1.08092	299.695	323.947
Zfp644	ENSMUSG00000049606	Zfp644	0.00407818	0.371094	0.912563	-1.09582	157.782	172.9
Ankrd12	ENSMUSG00000034647	Ankrd12	0.0414601	0.950316	0.943257	-1.06016	234.398	248.498
Lyst	ENSMUSG00000019726	Lyst	0.00154755	0.17558	1.0988	1.0988	261.676	238.147
BE692007	ENSMUSG00000099757	BE692007	3.10322e-07	0.000120295	0.906533	-1.1031	685.744	756.446
Psmb8	ENSMUSG00000024338	Psmb8	0.0287809	0.950316	0.949744	-1.05291	332.771	350.38
Crebrf	ENSMUSG00000048249	Crebrf	0.0361092	0.950316	1.06042	1.06042	234.903	221.518
Dipk1a	ENSMUSG00000029270	Dipk1a	0.020861	0.950316	0.950216	-1.05239	451.33	474.977
Fcrla	ENSMUSG00000038421	Fcrla	2.3896e-05	0.00602947	0.897717	-1.11394	264.33	294.447
Acap1	ENSMUSG00000001588	Acap1	0.022345	0.950316	0.936429	-1.06789	185.47	198.061
Rps7	ENSMUSG00000061477	Rps7	0.0481703	0.950316	1.02823	1.02823	2162.49	2103.11
Tsc22d4	ENSMUSG00000029723	Tsc22d4	0.027545	0.950316	0.94144	-1.0622	226.733	240.836
Dennd5b	ENSMUSG00000030313	Dennd5b	0.00894287	0.670967	0.926209	-1.07967	259.729	280.421
Actb	ENSMUSG00000029580	Actb	0.000171505	0.0295481	0.961556	-1.03998	3859.27	4013.56
9930111J21Rik2	ENSMUSG00000069892	9930111J21Rik2	0.0104898	0.756368	0.922647	-1.08384	161.672	175.226
Psmb9	ENSMUSG00000096727	Psmb9	0.000568152	0.0794857	0.900136	-1.11094	159.391	177.075
Psma3	ENSMUSG00000060073	Psma3	0.0167323	0.950316	0.933714	-1.07099	184.081	197.15
Ddx6	ENSMUSG00000032097	Ddx6	0.0357798	0.950316	1.04476	1.04476	458.509	438.867
Sypl	ENSMUSG00000020570	Sypl	0.0256123	0.950316	0.939935	-1.0639	217.65	231.558
Abca1	ENSMUSG00000015243	Abca1	0.000100683	0.0199299	0.872677	-1.1459	149.52	171.335
mt-Nd5	ENSMUSG00000064367	mt-Nd5	0.0139504	0.917224	1.0478	1.0478	590.55	563.609
Arl5c	ENSMUSG00000038352	Arl5c	0.00553857	0.468438	0.887562	-1.12668	117.808	132.732
Ucp2	ENSMUSG00000033685	Ucp2	5.34599e-09	2.88716e-06	1.12554	1.12554	536.416	476.585
Pten	ENSMUSG00000013663	Pten	0.00943313	0.699292	0.943367	-1.06003	346.838	367.66
Arhgap25	ENSMUSG00000030047	Arhgap25	0.00133709	0.15634	0.910881	-1.09784	199.199	218.688
Ktn1	ENSMUSG00000021843	Ktn1	0.0241811	0.950316	0.938567	-1.06545	226.395	241.214
Rpl7a	ENSMUSG00000062647	Rpl7a	5.22945e-05	0.0111844	1.07911	1.07911	667.999	619.026
Capza2	ENSMUSG00000015733	Capza2	0.0154779	0.950316	1.07348	1.07348	192.232	179.074
Tmem163	ENSMUSG00000026347	Tmem163	0.00734591	0.571905	0.935084	-1.06942	471.354	504.077
Atp6v0b	ENSMUSG00000033379	Atp6v0b	0.0444436	0.950316	0.950131	-1.05249	265.649	279.592
Nrros	ENSMUSG00000052384	Nrros	0.0107704	0.761994	1.06606	1.06606	310.826	291.564
Xpr1	ENSMUSG00000026469	Xpr1	0.0113583	0.782756	1.08995	1.08995	176.83	162.238
2610035D17Rik	ENSMUSG00000087259	2610035D17Rik	0.0307468	0.950316	1.08032	1.08032	190.421	176.264
Baz1a	ENSMUSG00000035021	Baz1a	0.00381289	0.356515	0.931562	-1.07347	304.698	327.082
Dhx40	ENSMUSG00000018425	Dhx40	6.26037e-05	0.0130884	1.15046	1.15046	178.77	155.391
Prrc2c	ENSMUSG00000040225	Prrc2c	0.0297118	0.950316	0.950276	-1.05233	349.858	368.165
Mat2b	ENSMUSG00000042032	Mat2b	0.0453253	0.950316	0.938427	-1.06561	152.146	162.129
Dgkd	ENSMUSG00000070738	Dgkd	0.0257563	0.950316	0.952432	-1.04994	428.748	450.161
Fermt3	ENSMUSG00000024965	Fermt3	0.00226275	0.23787	0.911623	-1.09694	174.881	191.835
Msn	ENSMUSG00000031207	Msn	0.00562541	0.471496	0.954188	-1.04801	624.65	654.64
Cd79a	ENSMUSG00000003379	Cd79a	6.89155e-19	1.42479e-15	0.912185	-1.09627	2688.15	2946.94
Rsrp1	ENSMUSG00000037266	Rsrp1	2.36908e-10	1.52005e-07	0.895296	-1.11695	571.075	637.862
Chst3	ENSMUSG00000057337	Chst3	0.00153818	0.17558	0.899803	-1.11135	154.318	171.502
Btg1	ENSMUSG00000036478	Btg1	0.0171102	0.950316	0.962425	-1.03904	791.479	822.38
Bach2	ENSMUSG00000040270	Bach2	0.0257338	0.950316	0.965427	-1.03581	1852.35	1918.69
Fcmr	ENSMUSG00000042474	Fcmr	0.00675383	0.544019	0.951109	-1.0514	663.979	698.11
Kmo	ENSMUSG00000039783	Kmo	0.000308836	0.048666	0.893217	-1.11955	177.122	198.297
Hnrnpa2b1	ENSMUSG00000004980	Hnrnpa2b1	0.00298568	0.29394	0.962168	-1.03932	1120.82	1164.89
Usp34	ENSMUSG00000056342	Usp34	0.0490804	0.950316	0.946324	-1.05672	229.215	242.216
Ccni	ENSMUSG00000063015	Ccni	0.0050655	0.43839	0.915109	-1.09277	153.432	167.665
Iglc3	ENSMUSG00000105547	Iglc3	0.000292771	0.0465607	0.935338	-1.06913	738.309	789.35
Cyb561a3	ENSMUSG00000034445	Cyb561a3	0.00268051	0.271066	0.922325	-1.08422	226.771	245.869
Slamf6	ENSMUSG00000015314	Slamf6	0.00586351	0.482754	0.92102	-1.08575	198.46	215.478
Rbm26	ENSMUSG00000022119	Rbm26	0.0253849	0.950316	0.932079	-1.07287	168.161	180.415
Actr3	ENSMUSG00000026341	Actr3	0.0104411	0.756368	0.961249	-1.04031	775.709	806.98
Txnip	ENSMUSG00000038393	Txnip	0.00172526	0.192227	0.937767	-1.06636	478.776	510.548
Susd6	ENSMUSG00000021133	Susd6	0.0460225	0.950316	0.944888	-1.05833	239.234	253.188
Setx	ENSMUSG00000043535	Setx	0.00187525	0.207695	0.908909	-1.10022	170.353	187.426
Arhgap17	ENSMUSG00000030766	Arhgap17	1.31501e-05	0.00349548	0.906168	-1.10355	347.852	383.872
Fcer2a	ENSMUSG00000005540	Fcer2a	9.874e-06	0.00278372	0.920603	-1.08624	817.78	888.309
Son	ENSMUSG00000022961	Son	0.0248931	0.950316	0.960553	-1.04107	542.942	565.238
Pxk	ENSMUSG00000033885	Pxk	0.000501536	0.0712372	0.932303	-1.07261	499.855	536.15
Tmem243	ENSMUSG00000079659	Tmem243	0.016734	0.950316	0.942745	-1.06073	294.699	312.597
Rpl3	ENSMUSG00000060036	Rpl3	0.0181758	0.950316	1.04089	1.04089	787.922	756.968
Rnase6	ENSMUSG00000021880	Rnase6	7.25735e-05	0.0145202	0.88837	-1.12566	175.122	197.128
Ikzf1	ENSMUSG00000018654	Ikzf1	0.011002	0.770637	0.94131	-1.06235	428.076	454.766
Actg1	ENSMUSG00000062825	Actg1	0.000652899	0.0867749	0.945117	-1.05807	1075.65	1138.11
Chd2	ENSMUSG00000078671	Chd2	0.0462153	0.950316	0.952467	-1.0499	367.284	385.613
Pde7a	ENSMUSG00000069094	Pde7a	0.015375	0.950316	0.944283	-1.05901	397.618	421.079
Nsd1	ENSMUSG00000021488	Nsd1	0.019992	0.950316	0.948261	-1.05456	356.838	376.308
Hnrnpul2	ENSMUSG00000071659	Hnrnpul2	0.00211699	0.225091	0.92079	-1.08602	228.359	248.003
Arhgdib	ENSMUSG00000030220	Arhgdib	0.00738588	0.572621	0.961981	-1.03952	1005.46	1045.2
Cr1l	ENSMUSG00000016481	Cr1l	0.0123727	0.830808	0.923608	-1.08271	160.461	173.732
Retreg1	ENSMUSG00000022270	Retreg1	0.000456762	0.0658834	0.905734	-1.10408	243.024	268.317
Jak2	ENSMUSG00000024789	Jak2	0.00408848	0.371094	1.0981	1.0981	178.079	162.17
Fus	ENSMUSG00000030795	Fus	2.59091e-08	1.17583e-05	1.12397	1.12397	477.879	425.172
4930523C07Rik	ENSMUSG00000090394	4930523C07Rik	1.89852e-06	0.000630816	1.1062	1.1062	490.976	443.84
Adamts6	ENSMUSG00000046169	Adamts6	0.0336083	0.950316	1.08476	1.08476	176.566	162.769
Slc12a6	ENSMUSG00000027130	Slc12a6	0.00205191	0.220693	0.936731	-1.06754	523.937	559.325
Tln1	ENSMUSG00000028465	Tln1	0.000927508	0.117518	0.914312	-1.09372	226.892	248.156
Pdcd4	ENSMUSG00000024975	Pdcd4	0.0284941	0.950316	1.05904	1.05904	281.78	266.071
Epc1	ENSMUSG00000024240	Epc1	0.0133042	0.880968	0.929476	-1.07587	188.853	203.182
Rps27a	ENSMUSG00000020460	Rps27a	0.00292092	0.289093	1.04589	1.04589	1798.96	1720.02
Rpl14	ENSMUSG00000025794	Rpl14	0.000443019	0.0654226	1.06598	1.06598	757.685	710.784
Gm15987	ENSMUSG00000085786	Gm15987	0.0135205	0.892115	1.05016	1.05016	793.442	755.545
Lcorl	ENSMUSG00000015882	Lcorl	0.0494548	0.950316	0.928759	-1.07671	147.817	159.156
Cdk8	ENSMUSG00000029635	Cdk8	0.0366908	0.950316	0.961948	-1.03956	3336.04	3468.01
Gm26740	ENSMUSG00000097705	Gm26740	3.4713e-05	0.00817601	0.929761	-1.07555	774.183	832.669
Lax1	ENSMUSG00000051998	Lax1	0.01988	0.950316	0.915474	-1.09233	128.325	140.173
Sltm	ENSMUSG00000032212	Sltm	0.0330058	0.950316	1.06376	1.06376	219.165	206.028
Smim14	ENSMUSG00000037822	Smim14	0.000148611	0.027684	0.926201	-1.07968	431.454	465.832
2010309G21Rik	ENSMUSG00000106567	2010309G21Rik	2.39225e-07	9.47078e-05	0.849332	-1.1774	258	303.769
Lrrc8c	ENSMUSG00000054720	Lrrc8c	0.0151381	0.950316	1.09705	1.09705	158.243	144.243
Dgka	ENSMUSG00000025357	Dgka	0.0356115	0.950316	0.943432	-1.05996	236.49	250.669
Clec2d	ENSMUSG00000030157	Clec2d	0.000637807	0.0859594	0.919754	-1.08725	333.714	362.83
Rplp0	ENSMUSG00000067274	Rplp0	0.0112661	0.779284	1.03854	1.03854	1441.68	1388.18
Cdkn1b	ENSMUSG00000003031	Cdkn1b	0.000164908	0.0291638	0.908701	-1.10047	249.299	274.346
Ptp4a2	ENSMUSG00000028788	Ptp4a2	0.00443057	0.396344	0.948531	-1.05426	515.516	543.489
Gpx1	ENSMUSG00000063856	Gpx1	0.0253487	0.950316	0.946897	-1.05608	390.002	411.874
Samd9l	ENSMUSG00000047735	Samd9l	2.32643e-06	0.000746342	0.869869	-1.1496	187.512	215.564
Igkv3-4	ENSMUSG00000096715	Igkv3-4	0.00128009	0.150751	0.828172	-1.20748	167.856	202.682
Klhl14	ENSMUSG00000042514	Klhl14	0.0110369	0.770637	0.88099	-1.13509	114.752	130.253
Tpm3	ENSMUSG00000027940	Tpm3	0.0350402	0.950316	1.04841	1.04841	375.055	357.737
Ypel3	ENSMUSG00000042675	Ypel3	0.00511167	0.440337	0.943086	-1.06035	394.88	418.71
Pold4	ENSMUSG00000024854	Pold4	0.000452681	0.0658049	0.90346	-1.10686	200.462	221.883
Foxp1	ENSMUSG00000030067	Foxp1	0.0364453	0.950316	1.0279	1.0279	2910.32	2831.32
Ube2h	ENSMUSG00000039159	Ube2h	0.00568101	0.471904	0.921566	-1.08511	228.715	248.181
Neat1	ENSMUSG00000092274	Neat1	0.0220822	0.950316	0.926843	-1.07893	164.925	177.943
Zfp608	ENSMUSG00000052713	Zfp608	0.0280694	0.950316	0.938564	-1.06546	250.588	266.991
Lbr	ENSMUSG00000004880	Lbr	0.0301975	0.950316	0.938561	-1.06546	183.773	195.803
Cd52	ENSMUSG00000000682	Cd52	3.47544e-10	2.02086e-07	0.901341	-1.10946	1137.91	1262.46
Birc3	ENSMUSG00000032000	Birc3	3.80407e-06	0.0011997	1.09951	1.09951	516.634	469.877
Gm42418	ENSMUSG00000098178	.	3.30966e-05	0.00789523	0.958514	-1.04328	17798.2	18568.5
Fam107b	ENSMUSG00000026655	Fam107b	6.52369e-05	0.0133392	1.08651	1.08651	501.491	461.562
Gps2	ENSMUSG00000023170	Gps2	0.00371678	0.351056	0.919738	-1.08727	186.069	202.307
Btg2	ENSMUSG00000020423	Btg2	0.0109749	0.770637	0.942845	-1.06062	331.788	351.901
Man2a1	ENSMUSG00000024085	Man2a1	0.000519908	0.0732874	0.898478	-1.11299	187.662	208.867
Spop	ENSMUSG00000057522	Spop	0.0387596	0.950316	0.938929	-1.06504	190.118	202.484
Hif1a	ENSMUSG00000021109	Hif1a	0.0115032	0.789812	0.912865	-1.09545	134.942	147.822
Sat1	ENSMUSG00000025283	Sat1	0.00016614	0.0291638	0.891191	-1.12209	166.68	187.03
Gpsm3	ENSMUSG00000034786	Gpsm3	0.00238847	0.248281	0.915952	-1.09176	172.128	187.922
Samhd1	ENSMUSG00000027639	Samhd1	0.000585347	0.0812802	0.934164	-1.07048	489.852	524.375
Ppia	ENSMUSG00000071866	Ppia	0.00578426	0.478346	1.04668	1.04668	982.592	938.773
Cobll1	ENSMUSG00000034903	Cobll1	0.00810673	0.615681	1.09661	1.09661	180.634	164.721
Ctsa	ENSMUSG00000017760	Ctsa	0.0105269	0.756368	0.924122	-1.08211	157.148	170.051
Dcaf12	ENSMUSG00000028436	Dcaf12	0.00305862	0.299535	0.902582	-1.10793	134.252	148.742
Klhl24	ENSMUSG00000062901	Klhl24	0.00255681	0.262843	0.929784	-1.07552	302.58	325.431
Mgat1	ENSMUSG00000020346	Mgat1	0.0142194	0.930029	0.923591	-1.08273	143.778	155.673
Unc93b1	ENSMUSG00000036908	Unc93b1	8.11057e-11	6.03653e-08	0.892441	-1.12052	575.234	644.562
Ighv9-3	ENSMUSG00000096459	Ighv9-3	0.00807525	0.615681	0.810197	-1.23427	130.205	160.708
Dock2	ENSMUSG00000020143	Dock2	0.0152181	0.950316	1.03735	1.03735	3228.5	3112.26
Gm7030	ENSMUSG00000092243	Gm7030	0.0439046	0.950316	0.913195	-1.09506	111.804	122.432
Cd84	ENSMUSG00000038147	Cd84	0.0250874	0.950316	0.936629	-1.06766	221.967	236.985
Plekha2	ENSMUSG00000031557	Plekha2	0.00191801	0.208904	0.920399	-1.08649	242.652	263.637
Dmac2	ENSMUSG00000057229	Dmac2	0.00678688	0.544325	0.903551	-1.10674	125.472	138.866
Mir142hg	ENSMUSG00000084796	Mir142hg	1.01522e-12	1.04945e-09	0.883037	-1.13246	623.692	706.304
Tnfaip8l2	ENSMUSG00000013707	Tnfaip8l2	0.0177726	0.950316	0.925297	-1.08073	138.188	149.344
4932438A13Rik	ENSMUSG00000037270	4932438A13Rik	0.04427	0.950316	0.940228	-1.06357	180.904	192.405
Hspa8	ENSMUSG00000015656	Hspa8	0.00188722	0.207784	0.949584	-1.05309	811.174	854.241
Cd72	ENSMUSG00000028459	Cd72	8.77581e-08	3.71117e-05	0.842861	-1.18644	163.601	194.102
F730311O21Rik	ENSMUSG00000100658	F730311O21Rik	4.87386e-05	0.0105728	0.878262	-1.13861	142.986	162.806
Rpl4	ENSMUSG00000032399	Rpl4	0.024263	0.950316	1.05413	1.05413	353.429	335.28
Eef1b2	ENSMUSG00000025967	Eef1b2	0.000148783	0.027684	1.09282	1.09282	405.333	370.904
Dbnl	ENSMUSG00000020476	Dbnl	0.011715	0.801403	0.925171	-1.08088	157.407	170.138
P2ry10	ENSMUSG00000050921	P2ry10	4.227e-07	0.000154219	1.16949	1.16949	213.035	182.161
Serinc3	ENSMUSG00000017707	Serinc3	0.0460729	0.950316	1.03599	1.03599	589.866	569.377
Plaur	ENSMUSG00000046223	Plaur	3.69232e-07	0.00014021	1.22605	1.22605	155.756	127.039
Zfp652	ENSMUSG00000075595	Zfp652	0.0476546	0.950316	0.93923	-1.0647	161.563	172.016
Cmah	ENSMUSG00000016756	Cmah	0.0195922	0.950316	0.946391	-1.05665	426.452	450.609
Atp11b	ENSMUSG00000037400	Atp11b	0.0163779	0.950316	0.930327	-1.07489	182.652	196.331
Iglc1	ENSMUSG00000105906	Iglc1	0.000376964	0.0570258	0.87647	-1.14094	152.446	173.932
Btaf1	ENSMUSG00000040565	Btaf1	0.0120915	0.818131	1.09533	1.09533	146.521	133.769
L3mbtl3	ENSMUSG00000039089	L3mbtl3	0.0124128	0.830808	0.918051	-1.08926	155.817	169.726
Mllt10	ENSMUSG00000026743	Mllt10	0.0485077	0.950316	0.946372	-1.05667	241.923	255.632
Ythdf3	ENSMUSG00000047213	Ythdf3	0.0293043	0.950316	0.929243	-1.07614	143.509	154.436
Kdm3b	ENSMUSG00000038773	Kdm3b	0.00684714	0.544516	0.922508	-1.084	191.481	207.566
Rasal3	ENSMUSG00000052142	Rasal3	0.0216299	0.950316	0.929458	-1.0759	150.895	162.347
Ifi27l2a	ENSMUSG00000079017	Ifi27l2a	0.00101353	0.125724	1.11055	1.11055	258.01	232.326
Tmod3	ENSMUSG00000058587	Tmod3	0.0282445	0.950316	1.0463	1.0463	496.829	474.844
Ccm2	ENSMUSG00000000378	Ccm2	0.000220712	0.0360245	0.911334	-1.09729	263.506	289.143
Aff4	ENSMUSG00000049470	Aff4	0.000450598	0.0658049	0.922951	-1.08348	409.73	443.935
Capg	ENSMUSG00000056737	Capg	0.0437146	0.950316	1.05942	1.05942	240.304	226.827
Dnajc7	ENSMUSG00000014195	Dnajc7	0.0376104	0.950316	0.950022	-1.05261	291.793	307.143
Eif4a1	ENSMUSG00000059796	Eif4a1	0.0111117	0.771473	1.07511	1.07511	215.036	200.012
Trim59	ENSMUSG00000034317	Trim59	1.16735e-06	0.000394926	0.867675	-1.15251	197.16	227.228
Dleu2	ENSMUSG00000097589	Dleu2	0.000642143	0.0859594	0.896565	-1.11537	231.226	257.902
Rps2	ENSMUSG00000044533	Rps2	7.27574e-11	5.64082e-08	1.09042	1.09042	1703.54	1562.28
Yme1l1	ENSMUSG00000026775	Yme1l1	0.0347651	0.950316	0.934189	-1.07045	150.275	160.862
1810026B05Rik	ENSMUSG00000101970	.	0.0492569	0.950316	0.956484	-1.0455	348.204	364.045
Rnasek	ENSMUSG00000093989	Rnasek	0.0307656	0.950316	0.92006	-1.08689	121.636	132.204
Mcl1	ENSMUSG00000038612	Mcl1	2.98717e-05	0.00731346	0.933483	-1.07126	696.003	745.598
Pecam1	ENSMUSG00000020717	Pecam1	0.0373893	0.950316	0.947639	-1.05525	308.907	325.975
S100a6	ENSMUSG00000001025	S100a6	0.00480798	0.423991	1.24727	1.24727	121.317	97.2656
Cd22	ENSMUSG00000030577	Cd22	0.0301904	0.950316	0.950511	-1.05207	334.762	352.192
Gramd1a	ENSMUSG00000001248	Gramd1a	0.0368678	0.950316	0.909186	-1.09988	110.593	121.639
Dennd1c	ENSMUSG00000002668	Dennd1c	0.0182876	0.950316	0.92653	-1.0793	140.883	152.054
Ldb1	ENSMUSG00000025223	Ldb1	0.0362987	0.950316	0.940146	-1.06366	168.395	179.116
Tle5	ENSMUSG00000054452	Tle5	0.0188956	0.950316	0.944493	-1.05877	280.008	296.464
Map4k1	ENSMUSG00000037337	Map4k1	0.00690959	0.547093	0.924947	-1.08114	189.267	204.625
Lcp1	ENSMUSG00000021998	Lcp1	7.01132e-05	0.0141804	0.935599	-1.06883	755.13	807.108
Slc14a1	ENSMUSG00000059336	Slc14a1	0.0442684	0.950316	0.920922	-1.08587	118.092	128.233
Ier5	ENSMUSG00000056708	Ier5	0.00872858	0.660214	0.942674	-1.06081	348.163	369.336
Herc4	ENSMUSG00000020064	Herc4	0.00500456	0.436551	1.06949	1.06949	401.362	375.285
Gpcpd1	ENSMUSG00000027346	Gpcpd1	0.00108673	0.12962	1.08597	1.08597	356.065	327.876
Rapgef1	ENSMUSG00000039844	Rapgef1	0.0261538	0.950316	1.07371	1.07371	172.052	160.241
Arhgap45	ENSMUSG00000035697	Arhgap45	2.5525e-10	1.58315e-07	0.90027	-1.11078	635.422	705.813
Tmsb10	ENSMUSG00000079523	Tmsb10	0.000163511	0.0291638	0.951685	-1.05077	2584.19	2715.39
Atg16l2	ENSMUSG00000047767	Atg16l2	0.0178109	0.950316	0.924388	-1.0818	148.222	160.346
Sgms1	ENSMUSG00000040451	Sgms1	0.016755	0.950316	1.05854	1.05854	475.21	448.93
Pou2f2	ENSMUSG00000008496	Pou2f2	0.0172492	0.950316	0.947472	-1.05544	386.323	407.741
Pou2af1	ENSMUSG00000032053	Pou2af1	0.00106539	0.128726	1.08139	1.08139	414.175	383.003
Siglecg	ENSMUSG00000030468	Siglecg	0.000206699	0.0340358	0.922657	-1.08383	374.954	406.385
Tnfrsf13c	ENSMUSG00000068105	Tnfrsf13c	2.76936e-10	1.66224e-07	0.840379	-1.18994	230.972	274.843
H3f3a	ENSMUSG00000060743	H3f3a	0.00107902	0.129532	0.955885	-1.04615	1371.71	1435.02
Rcsd1	ENSMUSG00000040723	Rcsd1	0.00171379	0.1921	0.933579	-1.07115	402.305	430.928
Tut4	ENSMUSG00000034610	Tut4	0.000104353	0.0204389	0.932181	-1.07275	632.185	678.178
Scd1	ENSMUSG00000037071	Scd1	0.0159479	0.950316	0.933385	-1.07137	194.988	208.904
Cd81	ENSMUSG00000037706	Cd81	0.00801649	0.615182	1.07307	1.07307	247.58	230.721
Prkce	ENSMUSG00000045038	Prkce	0.00953021	0.703685	0.935948	-1.06843	370.022	395.345
Baz2a	ENSMUSG00000040054	Baz2a	0.026699	0.950316	0.926079	-1.07982	135.776	146.614
Cnot2	ENSMUSG00000020166	Cnot2	0.000311241	0.048666	0.907005	-1.10253	236.872	261.158
Phtf2	ENSMUSG00000039987	Phtf2	0.0359514	0.950316	1.06637	1.06637	233.894	219.338
Ptprc	ENSMUSG00000026395	Ptprc	3.91578e-05	0.00888547	0.943339	-1.06006	1317.65	1396.8
Mindy2	ENSMUSG00000042444	Mindy2	0.0320865	0.950316	0.928181	-1.07738	138.212	148.906
Clec2i	ENSMUSG00000030365	Clec2i	2.02642e-06	0.000661503	0.863618	-1.15792	186.263	215.677
AU020206	ENSMUSG00000097415	AU020206	0.000152194	0.0277636	1.12427	1.12427	219.883	195.578
Rin3	ENSMUSG00000044456	Rin3	0.00405907	0.371094	0.90159	-1.10915	130.384	144.615
Plac8	ENSMUSG00000029322	Plac8	0.024041	0.950316	1.08415	1.08415	186.863	172.359
Rnf167	ENSMUSG00000040746	Rnf167	0.00754405	0.582457	0.925839	-1.0801	179.784	194.185
Gpr183	ENSMUSG00000051212	Gpr183	7.29912e-06	0.00208946	1.11605	1.11605	425.074	380.874
H2afj	ENSMUSG00000060032	.	0.030475	0.950316	0.931083	-1.07402	151.598	162.819
Ltb	ENSMUSG00000024399	Ltb	9.82238e-08	4.06144e-05	0.91254	-1.09584	738.379	809.147
Napsa	ENSMUSG00000002204	Napsa	0.0424508	0.950316	0.959985	-1.04168	484.084	504.262
Lat2	ENSMUSG00000040751	Lat2	0.0274751	0.950316	0.930538	-1.07465	143.042	153.719
Med13	ENSMUSG00000034297	Med13	0.0443828	0.950316	0.946192	-1.05687	275.479	291.145
Arap2	ENSMUSG00000037999	Arap2	5.44325e-06	0.00163354	1.13492	1.13492	292.614	257.827
Zfp36l2	ENSMUSG00000045817	Zfp36l2	0.033682	0.950316	1.0491	1.0491	394.289	375.835
Fbxo11	ENSMUSG00000005371	Fbxo11	0.0497912	0.950316	1.06575	1.06575	204.371	191.763
Mtss1	ENSMUSG00000022353	Mtss1	0.0174962	0.950316	0.938641	-1.06537	275.136	293.122
Irf5	ENSMUSG00000029771	Irf5	0.00280397	0.280502	0.916456	-1.09116	172.573	188.304
Rap1gds1	ENSMUSG00000028149	Rap1gds1	0.00036428	0.0555587	1.09337	1.09337	426.289	389.885
Hdac9	ENSMUSG00000004698	Hdac9	0.00522351	0.443807	0.900009	-1.1111	230.936	256.593
Cd83	ENSMUSG00000015396	Cd83	1.30389e-10	8.98572e-08	1.26118	1.26118	246.16	195.182
Gm20559	ENSMUSG00000106734	Gm20559	1.07647e-05	0.00294557	0.887007	-1.12739	258.712	291.668
Grk2	ENSMUSG00000024858	Grk2	0.0107489	0.761994	0.934888	-1.06965	227.129	242.948
Atp2a3	ENSMUSG00000020788	Atp2a3	0.000630837	0.0858098	0.90642	-1.10324	204.774	225.915
Top2b	ENSMUSG00000017485	Top2b	0.00565346	0.471722	0.926448	-1.07939	225.957	243.896
Fau	ENSMUSG00000038274	Fau	0.00518118	0.442916	0.967315	-1.03379	4440.55	4590.59
Tank	ENSMUSG00000064289	Tank	0.024127	0.950316	1.0621	1.0621	316.981	298.448
Rps6	ENSMUSG00000028495	Rps6	0.0161875	0.950316	1.05906	1.05906	365.987	345.576
Gm30054	ENSMUSG00000114937	Gm30054	4.86491e-06	0.00148396	0.868708	-1.15114	185.12	213.098
Galnt1	ENSMUSG00000000420	Galnt1	0.0288873	0.950316	0.940894	-1.06282	230.076	244.53
Vpreb3	ENSMUSG00000000903	Vpreb3	0.000592435	0.0816551	0.880876	-1.13523	136.563	155.031
Apobec3	ENSMUSG00000009585	Apobec3	0.00655203	0.532374	0.954755	-1.04739	631.84	661.782
Tnfaip8	ENSMUSG00000062210	Tnfaip8	0.0353356	0.950316	0.937051	-1.06718	200.34	213.798
Srsf1	ENSMUSG00000018379	Srsf1	0.0040441	0.371094	0.913724	-1.09442	143.724	157.294
Git2	ENSMUSG00000041890	Git2	0.0213247	0.950316	0.935191	-1.0693	190.99	204.225
Aim2	ENSMUSG00000037860	Aim2	0.0047624	0.423991	0.916033	-1.09166	161.747	176.574
Slc1a5	ENSMUSG00000001918	Slc1a5	0.019908	0.950316	0.938308	-1.06575	222.947	237.605
Ivns1abp	ENSMUSG00000023150	Ivns1abp	0.0396992	0.950316	0.9252	-1.08085	123.396	133.372
Elk3	ENSMUSG00000008398	Elk3	0.0400866	0.950316	0.898508	-1.11296	103.403	115.083
Il21r	ENSMUSG00000030745	Il21r	0.00999791	0.735301	0.922972	-1.08346	167.999	182.02
Slc50a1	ENSMUSG00000027953	Slc50a1	0.000631802	0.0858098	0.911002	-1.09769	205.927	226.044
Gnai3	ENSMUSG00000000001	Gnai3	0.00191984	0.208904	0.901134	-1.10971	135.109	149.933
Ppp1cc	ENSMUSG00000004455	Ppp1cc	0.0446338	0.950316	0.946974	-1.05599	213.59	225.55
Calhm2	ENSMUSG00000033033	Calhm2	0.0032511	0.313436	0.906437	-1.10322	134.059	147.897
Adrb2	ENSMUSG00000045730	Adrb2	0.0110582	0.770637	0.921108	-1.08565	141.083	153.166
Bcl11a	ENSMUSG00000000861	Bcl11a	0.029417	0.950316	0.949551	-1.05313	488.916	514.891
Ptpn6	ENSMUSG00000004266	Ptpn6	0.000134234	0.0257494	0.914106	-1.09397	345.974	378.483
Lrch1	ENSMUSG00000068015	Lrch1	0.0303202	0.950316	0.948515	-1.05428	328.029	345.835
Rpl36a	ENSMUSG00000079435	Rpl36a	0.0157291	0.950316	1.04874	1.04874	688.415	656.419
Senp7	ENSMUSG00000052917	Senp7	0.0150688	0.950316	0.936271	-1.06807	254.332	271.643
Swap70	ENSMUSG00000031015	Swap70	0.00886671	0.667947	0.949483	-1.0532	531.715	560.005
Prpf4b	ENSMUSG00000021413	Prpf4b	0.0197129	0.950316	0.942029	-1.06154	277.485	294.561
Myo1c	ENSMUSG00000017774	Myo1c	0.0481856	0.950316	0.942725	-1.06075	171.448	181.864
Lamb3	ENSMUSG00000026639	Lamb3	0.0343579	0.950316	0.918459	-1.08878	122.496	133.372
Lrmp	ENSMUSG00000030263	Lrmp	0.000464195	0.0664405	0.891523	-1.12168	165.211	185.314
Ncf4	ENSMUSG00000071715	Ncf4	0.00143724	0.165078	0.910092	-1.09879	169.758	186.528
Sf3b1	ENSMUSG00000025982	Sf3b1	0.000956922	0.119761	0.931505	-1.07353	364.773	391.595
H2-Ob	ENSMUSG00000041538	H2-Ob	0.0301385	0.950316	0.962675	-1.03877	586.548	609.29
Arhgap4	ENSMUSG00000031389	Arhgap4	4.88668e-05	0.0105728	0.888145	-1.12594	182.149	205.089
Hvcn1	ENSMUSG00000064267	Hvcn1	0.0142451	0.930029	0.938208	-1.06586	284.756	303.511
Pfn1	ENSMUSG00000018293	Pfn1	0.0230158	0.950316	0.96669	-1.03446	1156.47	1196.32
C1galt1	ENSMUSG00000042460	C1galt1	0.0106866	0.761994	0.927378	-1.07831	198.653	214.21
Plekho1	ENSMUSG00000015745	Plekho1	0.0322089	0.950316	0.937707	-1.06643	163.471	174.33
Susd1	ENSMUSG00000038578	Susd1	0.00558637	0.470342	0.909212	-1.09985	151.556	166.689
Mef2d	ENSMUSG00000001419	Mef2d	0.0291286	0.950316	0.927806	-1.07781	134.414	144.872
Tap2	ENSMUSG00000024339	Tap2	0.0292163	0.950316	0.934223	-1.07041	145.338	155.571
Scand1	ENSMUSG00000046229	Scand1	0.0250585	0.950316	0.933487	-1.07125	165.941	177.765
Gdi1	ENSMUSG00000015291	Gdi1	0.00134436	0.15634	0.911647	-1.09692	172.051	188.726
Tfeb	ENSMUSG00000023990	Tfeb	0.0158093	0.950316	0.90912	-1.09996	116.767	128.44
Zmym2	ENSMUSG00000021945	Zmym2	0.0185173	0.950316	0.926224	-1.07965	157.233	169.757
Tcf25	ENSMUSG00000001472	Tcf25	0.0214004	0.950316	0.946221	-1.05684	303.102	320.33
Gm45552	ENSMUSG00000110279	Gm45552	0.000254438	0.0411681	0.867077	-1.1533	121.836	140.513
Iglc2	ENSMUSG00000076937	Iglc2	1.66714e-08	7.95398e-06	0.904689	-1.10535	852.5	942.312
Hsp90aa1	ENSMUSG00000021270	Hsp90aa1	0.00385024	0.358207	0.906784	-1.1028	143.159	157.876
Fth1	ENSMUSG00000024661	Fth1	0.0282856	0.950316	0.971938	-1.02887	1834.05	1887
Gga2	ENSMUSG00000030872	Gga2	0.00105487	0.128287	0.914935	-1.09297	220.475	240.973
Cerk	ENSMUSG00000035891	Cerk	0.000201658	0.0335022	0.914068	-1.09401	325.474	356.072
Cd19	ENSMUSG00000030724	Cd19	0.000852192	0.109996	0.942625	-1.06087	542.302	575.31
Hnrnpdl	ENSMUSG00000029328	Hnrnpdl	0.0249257	0.950316	1.05704	1.05704	286.205	270.759
Spib	ENSMUSG00000008193	Spib	0.000336916	0.05181	0.883224	-1.13222	135.919	153.89
Ikzf3	ENSMUSG00000018168	Ikzf3	2.39792e-05	0.00602947	0.93423	-1.0704	947.993	1014.73
Rbm38	ENSMUSG00000027510	Rbm38	0.0158752	0.950316	0.928908	-1.07653	155.796	167.72
Atf7ip	ENSMUSG00000030213	Atf7ip	0.00103243	0.126728	0.917081	-1.09042	302.729	330.101
Sec11c	ENSMUSG00000024516	Sec11c	0.0171161	0.950316	0.933071	-1.07173	184.036	197.237
Ms4a1	ENSMUSG00000024673	Ms4a1	1.37796e-08	6.74729e-06	0.91261	-1.09576	831.649	911.286
Cd24a	ENSMUSG00000047139	Cd24a	0.000777352	0.10186	0.897759	-1.11389	181.056	201.676
Prkar1a	ENSMUSG00000020612	Prkar1a	0.00273066	0.274645	0.918731	-1.08846	197.585	215.063
Pan3	ENSMUSG00000029647	Pan3	0.00898331	0.671295	0.932938	-1.07188	277.365	297.303
Wdr1	ENSMUSG00000005103	Wdr1	0.0273756	0.950316	0.933242	-1.07153	151.212	162.029
Cybc1	ENSMUSG00000039294	Cybc1	0.0422771	0.950316	0.930196	-1.07504	126.718	136.228
Pcmtd1	ENSMUSG00000051285	Pcmtd1	0.000264122	0.0423666	1.11077	1.11077	264.439	238.069
Ankrd11	ENSMUSG00000035569	Ankrd11	0.0440528	0.950316	0.964424	-1.03689	643.072	666.794
Rac2	ENSMUSG00000033220	Rac2	0.0322453	0.950316	0.962438	-1.03903	618.85	643.003
Ssh2	ENSMUSG00000037926	Ssh2	0.0360003	0.950316	1.04698	1.04698	576.132	550.282
Arhgap15	ENSMUSG00000049744	Arhgap15	1.52646e-07	6.17452e-05	1.08085	1.08085	2342.16	2166.95
Npm1	ENSMUSG00000057113	Npm1	0.00667608	0.540095	1.06927	1.06927	327.005	305.822
Fos	ENSMUSG00000021250	Fos	0.0119069	0.811548	1.1462	1.1462	129.195	112.716
Phf21a	ENSMUSG00000058318	Phf21a	0.00803404	0.615182	0.932517	-1.07237	318.652	341.712
Cd180	ENSMUSG00000021624	Cd180	0.00492048	0.431865	0.91271	-1.09564	175.344	192.114
Il16	ENSMUSG00000001741	Il16	0.0041889	0.376536	0.933419	-1.07133	287.603	308.118
Jmjd1c	ENSMUSG00000037876	Jmjd1c	0.0105107	0.756368	1.07494	1.07494	276.562	257.281
Gm11342	ENSMUSG00000084788	Gm11342	0.000191348	0.0320758	0.8685	-1.15141	137.247	158.028
Smc4	ENSMUSG00000034349	Smc4	0.027447	0.950316	0.926359	-1.0795	142.125	153.423
Rasgrp2	ENSMUSG00000032946	Rasgrp2	6.49434e-05	0.0133392	0.89914	-1.11217	241.249	268.31
Smarca2	ENSMUSG00000024921	Smarca2	0.0231407	0.950316	0.929319	-1.07606	163.826	176.286
Arhgef1	ENSMUSG00000040940	Arhgef1	0.000325632	0.050492	0.93523	-1.06926	522.188	558.353
Prkd2	ENSMUSG00000041187	Prkd2	3.71641e-05	0.00864391	0.88771	-1.12649	199.738	225.004
Pax5	ENSMUSG00000014030	Pax5	0.000176563	0.0301404	0.932121	-1.07282	653.004	700.557
Arid3b	ENSMUSG00000004661	Arid3b	0.0442098	0.950316	0.93186	-1.07312	139.11	149.282
Igkv9-120	ENSMUSG00000094872	Igkv9-120	0.032149	0.950316	0.888168	-1.12591	209.096	235.424
Tut7	ENSMUSG00000035248	Tut7	0.0123662	0.830808	0.927605	-1.07805	182.923	197.2
2310001H17Rik	ENSMUSG00000097354	2310001H17Rik	0.00940548	0.699292	0.904275	-1.10586	122.303	135.25
Map4k2	ENSMUSG00000024948	Map4k2	0.0285095	0.950316	0.934035	-1.07062	154.537	165.451
Arpc4	ENSMUSG00000079426	Arpc4	0.0253268	0.950316	0.936119	-1.06824	168.231	179.711
Cyp4f18	ENSMUSG00000003484	Cyp4f18	0.00103523	0.126728	0.903268	-1.10709	177.262	196.245
Rnf144a	ENSMUSG00000020642	Rnf144a	0.0150713	0.950316	0.928228	-1.07732	175.24	188.79
Lrrk2	ENSMUSG00000036273	Lrrk2	0.007237	0.568488	1.06247	1.06247	600.293	564.996
Nme2	ENSMUSG00000020857	Nme2	0.00120821	0.143192	1.10133	1.10133	242.899	220.551
Ttc14	ENSMUSG00000027677	Ttc14	0.0366177	0.950316	0.942531	-1.06097	202.619	214.973
Anp32a	ENSMUSG00000032249	Anp32a	0.0268951	0.950316	0.937401	-1.06678	194.237	207.208
Txndc5	ENSMUSG00000038991	Txndc5	0.00364812	0.34633	0.918588	-1.08863	186.765	203.317
Tnfrsf13b	ENSMUSG00000010142	Tnfrsf13b	0.027282	0.950316	0.936838	-1.06742	191.81	204.741
Csk	ENSMUSG00000032312	Csk	0.00220556	0.233175	0.934537	-1.07005	336.013	359.551

## Sheet: Blood_Follicular_HF vs sham
Gene ID	Ensembl ID	Gene name	P-value	FDR step up	Ratio	Fold change	LSMean(HF)	LSMean(sham)		Genes differentially expressed in antigen processing and presentation
Xist	ENSMUSG00000086503	Xist	8.3222e-97	1.54893e-92	0.350568	-2.85251	96.8623	276.301		Gene Symbol	Gene Description
Pde3b	ENSMUSG00000030671	Pde3b	1.09297e-31	1.01712e-27	0.63165	-1.58315	191.914	303.829		HSP90AB1	heat shock protein 90 alpha family class B member 1
Tsc22d3	ENSMUSG00000031431	Tsc22d3	9.39619e-30	5.8294e-26	1.30826	1.30826	522.22	399.173		HLA-DQA1	major histocompatibility complex, class II, DQ alpha 1
Gm43305	ENSMUSG00000105703	Gm43305	7.11993e-25	3.3129e-21	1.23039	1.23039	1570.57	1276.48		HLA-A	major histocompatibility complex, class I, A
Malat1	ENSMUSG00000092341	Malat1	3.45797e-23	1.28719e-19	0.940116	-1.0637	28259.3	30059.4		HLA-B	major histocompatibility complex, class I, B
mt-Co3	ENSMUSG00000064358	mt-Co3	5.17596e-22	1.60558e-18	1.123	1.123	2857.1	2544.17		HSPA5	heat shock protein family A (Hsp70) member 5
mt-Atp6	ENSMUSG00000064357	mt-Atp6	1.44982e-16	3.85486e-13	1.11316	1.11316	2026.41	1820.42		IFI30	IFI30 lysosomal thiol reductase
Cd74	ENSMUSG00000024610	Cd74	9.77132e-16	2.2733e-12	1.06385	1.06385	23009.5	21628.6		PDIA3	protein disulfide isomerase family A member 3
Pgap1	ENSMUSG00000073678	Pgap1	1.70599e-15	3.52798e-12	1.20418	1.20418	785.64	652.426		CD74	CD74 molecule
H3f3b	ENSMUSG00000016559	H3f3b	2.95035e-15	5.4912e-12	0.869106	-1.15061	749.332	862.187
mt-Nd1	ENSMUSG00000064341	mt-Nd1	8.45632e-15	1.43081e-11	1.14974	1.14974	874.386	760.504
Adgre5	ENSMUSG00000002885	Adgre5	1.19639e-14	1.8556e-11	1.27016	1.27016	328.049	258.273
mt-Co2	ENSMUSG00000064354	mt-Co2	1.42204e-13	2.03592e-10	1.09657	1.09657	2209.03	2014.49
Ets1	ENSMUSG00000032035	Ets1	3.76806e-13	5.00937e-10	1.11662	1.11662	1354.89	1213.39
Cd69	ENSMUSG00000030156	Cd69	2.14213e-11	2.65796e-08	1.23303	1.23303	398.003	322.785
Vim	ENSMUSG00000026728	Vim	4.18973e-11	4.8737e-08	1.21951	1.21951	427.051	350.182
Fam169b	ENSMUSG00000074071	Fam169b	6.08845e-11	6.66577e-08	0.805476	-1.2415	228.829	284.092
H2-Aa	ENSMUSG00000036594	H2-Aa	0.0473358	0.82953	0.980625	-1.01976	3681.05	3753.78
Man1a	ENSMUSG00000003746	Man1a	1.93795e-10	1.83198e-07	0.89392	-1.11867	1311.64	1467.29
Junb	ENSMUSG00000052837	Junb	1.9686e-10	1.83198e-07	0.829209	-1.20597	308.93	372.56
Apbb1ip	ENSMUSG00000026786	Apbb1ip	2.3724e-10	2.10263e-07	1.14307	1.14307	720.374	630.209
4933406I18Rik	ENSMUSG00000087475	4933406I18Rik	2.7172e-10	2.29875e-07	0.699064	-1.43048	115.588	165.347
mt-Co1	ENSMUSG00000064351	mt-Co1	5.50032e-10	4.45095e-07	1.07066	1.07066	3596.01	3358.69
Mef2c	ENSMUSG00000005583	Mef2c	6.89711e-10	5.34871e-07	0.912504	-1.09589	1843.97	2020.78
Foxn3	ENSMUSG00000033713	Foxn3	1.0726e-09	7.98531e-07	1.12378	1.12378	902.593	803.179
Gm20513	ENSMUSG00000092415	Gm20513	1.16097e-09	8.31074e-07	0.797341	-1.25417	157.849	197.969
Ccnd3	ENSMUSG00000034165	Ccnd3	1.25752e-09	8.6685e-07	1.16637	1.16637	490.241	420.313
Rps24	ENSMUSG00000025290	Rps24	1.71555e-09	1.14035e-06	1.06369	1.06369	3539.27	3327.35
Pde4b	ENSMUSG00000028525	Pde4b	2.77579e-09	1.78149e-06	0.885445	-1.12938	599.882	677.492
H2-D1	ENSMUSG00000073411	H2-D1	3.38036e-09	2.09717e-06	0.932751	-1.0721	1904.89	2042.23
mt-Nd2	ENSMUSG00000064345	mt-Nd2	5.47317e-09	3.28602e-06	1.11967	1.11967	723.497	646.171
Tagap	ENSMUSG00000033450	Tagap	9.91857e-09	5.76889e-06	1.25974	1.25974	173.636	137.835
Slfn2	ENSMUSG00000072620	Slfn2	1.1212e-08	6.32357e-06	0.85188	-1.17387	283.249	332.498
Klf3	ENSMUSG00000029178	Klf3	1.17318e-08	6.42211e-06	1.17579	1.17579	389.042	330.877
Tagln2	ENSMUSG00000026547	Tagln2	1.48565e-08	7.90024e-06	1.21909	1.21909	240.472	197.256
Ikbkb	ENSMUSG00000031537	Ikbkb	2.34727e-08	1.21354e-05	1.1733	1.1733	299.71	255.441
H2-K1	ENSMUSG00000061232	H2-K1	1.19512e-10	1.23575e-07	0.909181	-1.09989	1219.52	1341.34
Prkcb	ENSMUSG00000052889	Prkcb	3.23453e-08	1.58424e-05	1.09411	1.09411	1211.68	1107.45
Gm26917	ENSMUSG00000097971	.	4.64496e-08	2.21672e-05	0.837559	-1.19395	251.07	299.764
Rps27	ENSMUSG00000090733	Rps27	6.97534e-08	3.24562e-05	1.07442	1.07442	1701.48	1583.63
mt-Cytb	ENSMUSG00000064370	mt-Cytb	8.77996e-08	3.98567e-05	1.07043	1.07043	2577.93	2408.32
Snx5	ENSMUSG00000027423	Snx5	1.01875e-07	4.51452e-05	0.868173	-1.15184	317.829	366.089
Rps21	ENSMUSG00000039001	Rps21	1.10292e-07	4.77386e-05	1.08065	1.08065	1432.97	1326.03
Rpl38	ENSMUSG00000057322	Rpl38	2.46122e-07	0.00010411	1.08065	1.08065	1368.98	1266.81
Dnaja1	ENSMUSG00000028410	Dnaja1	3.77704e-07	0.000156219	1.16035	1.16035	304.857	262.729
Stt3b	ENSMUSG00000032437	Stt3b	8.70728e-07	0.000352304	1.17571	1.17571	344.334	292.874
Crip1	ENSMUSG00000006360	Crip1	1.07603e-06	0.000426107	1.13132	1.13132	443.346	391.885
Ly6e	ENSMUSG00000022587	Ly6e	1.10529e-06	0.000428577	0.944072	-1.05924	2132.54	2258.87
Ly6a	ENSMUSG00000075602	Ly6a	1.20967e-06	0.000459476	0.858104	-1.16536	245.556	286.161
Atp2b1	ENSMUSG00000019943	Atp2b1	1.47078e-06	0.000547485	1.14872	1.14872	399.549	347.821
Gm19951	ENSMUSG00000113136	Gm19951	3.09639e-06	0.00113	1.1506	1.1506	345.265	300.074
Rps15a	ENSMUSG00000008683	Rps15a	3.38222e-06	0.00121058	1.06688	1.06688	1538.84	1442.38
Stat4	ENSMUSG00000062939	Stat4	3.91574e-06	0.00137509	0.874749	-1.14319	330.676	378.024
Klf2	ENSMUSG00000055148	Klf2	4.42467e-06	0.00152504	1.07483	1.07483	1444.63	1344.05
Itga4	ENSMUSG00000027009	Itga4	4.51497e-06	0.00152787	1.10119	1.10119	761.246	691.297
Limd1	ENSMUSG00000025239	Limd1	6.82951e-06	0.00226984	1.15634	1.15634	223.714	193.468
Lbh	ENSMUSG00000024063	Lbh	7.53094e-06	0.00245905	1.13479	1.13479	316.103	278.557
Zfp36	ENSMUSG00000044786	Zfp36	8.15952e-06	0.00261836	0.890754	-1.12264	326.892	366.984
Ddx5	ENSMUSG00000020719	Ddx5	1.03838e-05	0.00327565	0.938962	-1.06501	1250.97	1332.29
Ppp1r10	ENSMUSG00000039220	Ppp1r10	1.06883e-05	0.0033155	0.869544	-1.15003	204.372	235.033
Rpl37a	ENSMUSG00000046330	Rpl37a	1.34218e-05	0.00409518	1.07242	1.07242	1085.5	1012.2
Igkv6-15	ENSMUSG00000094797	Igkv6-15	1.56056e-05	0.00468471	0.811297	-1.23259	233.104	287.322
Dennd4a	ENSMUSG00000053641	Dennd4a	1.81883e-05	0.00537333	1.10638	1.10638	766.008	692.354
Rhoh	ENSMUSG00000029204	Rhoh	1.94671e-05	0.00566128	0.885626	-1.12915	288.946	326.262
Card11	ENSMUSG00000036526	Card11	1.98904e-05	0.00569539	1.13558	1.13558	298.548	262.904
Coro1a	ENSMUSG00000030707	Coro1a	2.05124e-05	0.0057845	1.06909	1.06909	1132.51	1059.32
Satb1	ENSMUSG00000023927	Satb1	2.29943e-05	0.00635108	0.88446	-1.13063	331.157	374.417
Jund	ENSMUSG00000071076	Jund	2.3204e-05	0.00635108	1.08266	1.08266	883.645	816.181
Cyth1	ENSMUSG00000017132	Cyth1	2.73366e-05	0.00737375	0.894362	-1.11811	322.278	360.343
Add3	ENSMUSG00000025026	Add3	2.80366e-05	0.00745452	1.07663	1.07663	1066.48	990.574
Blk	ENSMUSG00000014453	Blk	2.91703e-05	0.00764671	1.11537	1.11537	397.469	356.357
Laptm5	ENSMUSG00000028581	Laptm5	2.97644e-05	0.0076941	0.923097	-1.08331	655.03	709.6
Kmt2a	ENSMUSG00000002028	Kmt2a	3.25774e-05	0.0083059	0.890597	-1.12284	290.307	325.969
Akap13	ENSMUSG00000066406	Akap13	3.48421e-05	0.00876325	1.07712	1.07712	974.784	904.989
Iqgap1	ENSMUSG00000030536	Iqgap1	3.99321e-05	0.00990955	1.09033	1.09033	565.245	518.418
Zcchc7	ENSMUSG00000035649	Zcchc7	4.30989e-05	0.0105547	0.917975	-1.08935	662.945	722.183
Stk4	ENSMUSG00000018209	Stk4	4.39721e-05	0.0106287	1.10337	1.10337	409.427	371.068
Rabgap1l	ENSMUSG00000026721	Rabgap1l	5.22597e-05	0.0124182	1.08512	1.08512	769.148	708.811
Eef1a1	ENSMUSG00000037742	Eef1a1	5.271e-05	0.0124182	0.956077	-1.04594	2791	2919.22
Rps8	ENSMUSG00000047675	Rps8	5.34161e-05	0.0124273	1.04877	1.04877	2636.31	2513.71
Sell	ENSMUSG00000026581	Sell	5.63837e-05	0.0129557	0.925842	-1.0801	700.603	756.72
H2-Q4	ENSMUSG00000035929	H2-Q4	5.98914e-05	0.0135939	0.878416	-1.13841	178.625	203.349
Rapgef4	ENSMUSG00000049044	Rapgef4	6.31233e-05	0.0141548	0.859744	-1.16314	186.898	217.388
Btla	ENSMUSG00000052013	Btla	6.9361e-05	0.0153684	0.925883	-1.08005	790.972	854.289
Ezr	ENSMUSG00000052397	Ezr	7.2956e-05	0.0159748	1.09815	1.09815	502.951	457.998
Hnrnpa0	ENSMUSG00000007836	Hnrnpa0	9.26544e-05	0.0200521	1.13279	1.13279	215.173	189.95
Cytip	ENSMUSG00000026832	Cytip	9.45813e-05	0.0202339	1.08432	1.08432	643.654	593.6
Rpl41	ENSMUSG00000093674	Rpl41	9.57249e-05	0.0202458	1.05108	1.05108	1857.59	1767.31
Rps29	ENSMUSG00000034892	Rps29	0.000102063	0.0213437	1.0609	1.0609	1204.44	1135.3
Rpl13	ENSMUSG00000000740	Rpl13	0.000103955	0.0214979	1.04497	1.04497	2714.31	2597.51
Apoe	ENSMUSG00000002985	Apoe	0.000117654	0.0240635	0.836575	-1.19535	131.949	157.725
Rpl23	ENSMUSG00000071415	Rpl23	0.000126302	0.0253923	1.052	1.052	1626.36	1545.97
Hipk1	ENSMUSG00000008730	Hipk1	0.00012688	0.0253923	1.13221	1.13221	228.981	202.242
Jak1	ENSMUSG00000028530	Jak1	0.000134107	0.0264279	0.928697	-1.07678	628.77	677.045
B4galnt1	ENSMUSG00000006731	B4galnt1	0.000134894	0.0264279	1.12139	1.12139	283.139	252.489
Rps12	ENSMUSG00000061983	Rps12	0.000147643	0.0286243	1.07739	1.07739	665.401	617.605
Srsf11	ENSMUSG00000055436	Srsf11	0.000153143	0.0293845	0.902675	-1.10782	295.856	327.755
H2-Q6	ENSMUSG00000073409	H2-Q6	0.000681991	0.0968948	0.891365	-1.12187	172.322	193.324
Cxcr5	ENSMUSG00000047880	Cxcr5	0.000167325	0.0314571	1.11825	1.11825	288.021	257.564
Fcrl1	ENSMUSG00000059994	Fcrl1	0.000179253	0.0330348	0.898749	-1.11266	290.812	323.574
Ier2	ENSMUSG00000053560	Ier2	0.000179267	0.0330348	0.878153	-1.13875	165.647	188.631
Rps10	ENSMUSG00000052146	Rps10	0.000186666	0.034061	1.05356	1.05356	1580.02	1499.7
Rplp2	ENSMUSG00000025508	Rplp2	0.000200052	0.0361493	1.07086	1.07086	801.869	748.807
Shisa5	ENSMUSG00000025647	Shisa5	0.000212369	0.0377933	0.942459	-1.06105	948.675	1006.6
Rps7	ENSMUSG00000061477	Rps7	0.000213212	0.0377933	1.05042	1.05042	1810	1723.11
Rpl30	ENSMUSG00000058600	Rpl30	0.000219	0.0384531	1.05189	1.05189	1545.51	1469.28
mt-Nd4	ENSMUSG00000064363	mt-Nd4	0.000238047	0.0414068	1.08044	1.08044	603.097	558.197
Snx29	ENSMUSG00000071669	Snx29	0.000251874	0.0430674	0.912512	-1.09588	423.394	463.987
Etnk1	ENSMUSG00000030275	Etnk1	0.000252221	0.0430674	1.08944	1.08944	457.671	420.096
Rps20	ENSMUSG00000028234	Rps20	0.000259296	0.0438729	1.04404	1.04404	2426.36	2324.01
Uty	ENSMUSG00000068457	Uty	0.000281768	0.0472456	1.27514	1.27514	123.051	96.4999
Rps26	ENSMUSG00000025362	Rps26	0.000284868	0.047339	1.05648	1.05648	1314.37	1244.1
Ppp3cc	ENSMUSG00000022092	Ppp3cc	0.000305557	0.0503277	0.899017	-1.11233	260.237	289.468
Rpl11	ENSMUSG00000059291	Rpl11	0.000322782	0.0526984	1.05651	1.05651	1225.97	1160.39
AI467606	ENSMUSG00000045165	AI467606	0.000331625	0.0536713	1.12444	1.12444	210.837	187.504
Rps5	ENSMUSG00000012848	Rps5	0.000351307	0.0563666	1.051	1.051	1518.12	1444.45
Maml2	ENSMUSG00000031925	Maml2	0.00035435	0.0563689	0.904995	-1.10498	478.606	528.849
Calm2	ENSMUSG00000036438	Calm2	0.000394759	0.0622649	0.897928	-1.11367	235.263	262.007
Cd2	ENSMUSG00000027863	Cd2	0.000434152	0.0679028	1.10036	1.10036	353.93	321.649
Ncoa3	ENSMUSG00000027678	Ncoa3	0.000471842	0.0731828	1.11246	1.11246	261.005	234.62
Ubb	ENSMUSG00000019505	Ubb	0.000483894	0.0744317	0.948899	-1.05385	1185.87	1249.74
Cd79b	ENSMUSG00000040592	Cd79b	0.000491943	0.0750426	0.953924	-1.0483	1523.97	1597.58
mt-Nd4l	ENSMUSG00000065947	mt-Nd4l	0.000499093	0.0750426	1.05695	1.05695	1114.7	1054.64
Cd37	ENSMUSG00000030798	Cd37	0.000499962	0.0750426	1.04382	1.04382	1755.33	1681.65
Mycbp2	ENSMUSG00000033004	Mycbp2	0.000524895	0.0781547	0.929649	-1.07567	576.166	619.767
Sp100	ENSMUSG00000026222	Sp100	0.000544562	0.0804395	0.935995	-1.06838	708.632	757.089
Ighm	ENSMUSG00000076617	Ighm	0.000549255	0.0804939	0.940203	-1.0636	756.071	804.158
Malt1	ENSMUSG00000032688	Malt1	0.000559134	0.0813016	1.08322	1.08322	533.694	492.691
Rap1b	ENSMUSG00000052681	Rap1b	0.000588167	0.0848602	1.08695	1.08695	406.664	374.132
Trim34a	ENSMUSG00000056144	Trim34a	0.000608639	0.0871384	0.899989	-1.11112	236.527	262.811
H2-Q7	ENSMUSG00000060550	H2-Q7	0.0235803	0.82953	0.919589	-1.08744	149.908	163.016
Limd2	ENSMUSG00000040699	Limd2	0.000699788	0.0986701	0.935113	-1.06939	605.79	647.825
Actr2	ENSMUSG00000020152	Actr2	0.000708408	0.0991346	1.08075	1.08075	442.979	409.882
Stk17b	ENSMUSG00000026094	Stk17b	0.00071782	0.099702	0.932813	-1.07203	623.284	668.177
St3gal1	ENSMUSG00000013846	St3gal1	0.000726231	0.100123	1.12074	1.12074	219.876	196.188
Gm47782	ENSMUSG00000114794	Gm47782	0.000743848	0.101798	0.818243	-1.22213	158.469	193.67
Rps19	ENSMUSG00000040952	Rps19	0.0007569	0.102828	1.05574	1.05574	1014.41	960.856
Kdm6a	ENSMUSG00000037369	Kdm6a	0.000774878	0.104507	0.882653	-1.13295	144.815	164.068
Fchsd2	ENSMUSG00000030691	Fchsd2	0.000872222	0.11679	0.944905	-1.05831	1561	1652.02
Oaz1	ENSMUSG00000035242	Oaz1	0.000880802	0.117096	1.07331	1.07331	541.077	504.118
Mat2a	ENSMUSG00000053907	Mat2a	0.000899366	0.118716	1.12532	1.12532	182.799	162.442
Rel	ENSMUSG00000020275	Rel	0.000945105	0.123875	0.921371	-1.08534	407.533	442.311
mt-Atp8	ENSMUSG00000064356	mt-Atp8	0.00100014	0.130172	1.10148	1.10148	263.62	239.332
Cacybp	ENSMUSG00000014226	Cacybp	0.00105269	0.13606	1.16742	1.16742	136.905	117.271
Sesn3	ENSMUSG00000032009	Sesn3	0.00106376	0.136542	1.11179	1.11179	225.625	202.939
Arid5b	ENSMUSG00000019947	Arid5b	0.00109505	0.139596	0.906692	-1.10291	320.319	353.283
Rpl24	ENSMUSG00000098274	Rpl24	0.00121557	0.153906	1.06274	1.06274	740.342	696.635
Ddx24	ENSMUSG00000041645	Ddx24	0.00123162	0.154884	0.899412	-1.11184	195.468	217.329
Grk6	ENSMUSG00000074886	Grk6	0.00126209	0.157651	1.08762	1.08762	355.455	326.82
Sp140	ENSMUSG00000070031	Sp140	0.00127121	0.157731	0.900065	-1.11103	199.352	221.487
Rpl35	ENSMUSG00000062997	Rpl35	0.00128341	0.158191	1.06192	1.06192	765.991	721.325
BE692007	ENSMUSG00000099757	BE692007	0.00130966	0.160112	0.938092	-1.06599	778.921	830.325
Immp2l	ENSMUSG00000056899	Immp2l	0.00132369	0.160112	0.920701	-1.08613	694.292	754.09
Tnrc6b	ENSMUSG00000047888	Tnrc6b	0.00132481	0.160112	0.926067	-1.07984	415.894	449.097
Rpl22	ENSMUSG00000028936	Rpl22	0.00139014	0.166925	1.06195	1.06195	746.681	703.125
Tpt1	ENSMUSG00000060126	Tpt1	0.0014166	0.169012	1.05077	1.05077	1127.96	1073.46
Ighd	ENSMUSG00000104213	Ighd	0.00151827	0.179191	0.939411	-1.0645	621.665	661.761
Map3k5	ENSMUSG00000071369	Map3k5	0.00152118	0.179191	0.897016	-1.11481	188.709	210.374
Ddx3y	ENSMUSG00000069045	Ddx3y	0.0016173	0.189316	1.25093	1.25093	119.661	95.6572
Rara	ENSMUSG00000037992	Rara	0.00163455	0.190139	1.14513	1.14513	137.927	120.446
Rpl27	ENSMUSG00000063316	Rpl27	0.00170186	0.19674	1.0661	1.0661	645.064	605.071
Rpl34	ENSMUSG00000062006	Rpl34	0.00173402	0.199219	1.04643	1.04643	1363.97	1303.45
Eif2s3y	ENSMUSG00000069049	Eif2s3y	0.00182611	0.207157	1.21238	1.21238	124.465	102.661
Trim30a	ENSMUSG00000030921	Trim30a	0.00183252	0.207157	0.878828	-1.13788	148.489	168.962
Snx8	ENSMUSG00000029560	Snx8	0.00183649	0.207157	1.10438	1.10438	229.952	208.219
Hmgb2	ENSMUSG00000054717	Hmgb2	0.00188058	0.210852	0.872871	-1.14565	120.673	138.249
Man2b1	ENSMUSG00000005142	Man2b1	0.00207551	0.229588	1.10851	1.10851	192.642	173.785
Ifi213	ENSMUSG00000073491	Ifi213	0.00207718	0.229588	0.879842	-1.13657	159.247	180.995
AY036118	ENSMUSG00000105361	AY036118	0.0020847	0.229588	1.1032	1.1032	391.03	354.451
Dennd1a	ENSMUSG00000035392	Dennd1a	0.00210517	0.230479	0.901797	-1.1089	196.727	218.151
Rabac1	ENSMUSG00000003380	Rabac1	0.00212898	0.231575	1.11524	1.11524	167.941	150.587
Rpl32	ENSMUSG00000057841	Rpl32	0.00214006	0.231575	1.04957	1.04957	1128.91	1075.6
Fry	ENSMUSG00000056602	Fry	0.00215331	0.231662	1.09329	1.09329	357.962	327.419
Haao	ENSMUSG00000000673	Haao	0.00221559	0.236992	0.908536	-1.10067	223.187	245.656
Tcp11l2	ENSMUSG00000020034	Tcp11l2	0.00224295	0.238547	1.09408	1.09408	289.04	264.185
Inpp4b	ENSMUSG00000037940	Inpp4b	0.00234009	0.247464	0.9239	-1.08237	754.116	816.231
Rps27a	ENSMUSG00000020460	Rps27a	0.00242784	0.255294	1.04467	1.04467	1448.4	1386.46
Rps28	ENSMUSG00000067288	Rps28	0.00247553	0.257412	1.04927	1.04927	1107.24	1055.25
Ccr7	ENSMUSG00000037944	Ccr7	0.00247564	0.257412	1.0797	1.0797	472.167	437.313
Rps16	ENSMUSG00000037563	Rps16	0.00249821	0.258315	1.04017	1.04017	1821.66	1751.32
Pdia3	ENSMUSG00000027248	Pdia3	0.00253297	0.260462	0.908951	-1.10017	227.965	250.8
Gimap1	ENSMUSG00000090019	Gimap1	0.00270605	0.276642	1.06774	1.06774	532.945	499.136
Vapa	ENSMUSG00000024091	Vapa	0.00272773	0.276642	1.10548	1.10548	194.66	176.086
Eif1	ENSMUSG00000035530	Eif1	0.00273491	0.276642	0.951075	-1.05144	868.547	913.227
Acap1	ENSMUSG00000001588	Acap1	0.00299675	0.301489	1.09875	1.09875	219.691	199.946
Rftn1	ENSMUSG00000039316	Rftn1	0.00303408	0.303604	0.91513	-1.09274	264.429	288.953
Slc9a7	ENSMUSG00000037341	Slc9a7	0.00305132	0.303696	0.934185	-1.07045	549.982	588.729
Rpl39	ENSMUSG00000079641	Rpl39	0.00307674	0.303896	1.04515	1.04515	1283.33	1227.89
Trim7	ENSMUSG00000040350	Trim7	0.00308599	0.303896	1.10701	1.10701	214.341	193.622
Zfp638	ENSMUSG00000030016	Zfp638	0.00322285	0.315704	0.915458	-1.09235	246.782	269.572
Snrpg	ENSMUSG00000057278	Snrpg	0.00325765	0.317442	1.10228	1.10228	204.19	185.244
Dusp2	ENSMUSG00000027368	Dusp2	0.00339718	0.329314	0.895822	-1.11629	147.692	164.868
Zfp36l1	ENSMUSG00000021127	Zfp36l1	0.00343829	0.331572	0.949754	-1.0529	854.475	899.68
Tnks2	ENSMUSG00000024811	Tnks2	0.00360213	0.345581	1.08485	1.08485	312.232	287.811
Rpl35a	ENSMUSG00000060636	Rpl35a	0.00363696	0.347134	1.04177	1.04177	1468.49	1409.61
Id3	ENSMUSG00000007872	Id3	0.00380028	0.360871	0.889295	-1.12449	139.039	156.347
B3gnt2	ENSMUSG00000051650	B3gnt2	0.00389239	0.367742	1.09204	1.09204	251.28	230.101
Cd52	ENSMUSG00000000682	Cd52	0.00415226	0.38894	1.04688	1.04688	1069.73	1021.83
Lncpint	ENSMUSG00000044471	Lncpint	0.00415856	0.38894	0.917162	-1.09032	290.968	317.249
Bach2	ENSMUSG00000040270	Bach2	0.00448065	0.415475	0.959351	-1.04237	2071.46	2159.23
Actb	ENSMUSG00000029580	Actb	0.00448692	0.415475	1.03087	1.03087	3770.5	3657.58
Mylip	ENSMUSG00000038175	Mylip	0.00453831	0.418153	0.920445	-1.08643	269.103	292.362
Dynll1	ENSMUSG00000009013	Dynll1	0.00457974	0.419892	1.09704	1.09704	206.961	188.654
Rpl36	ENSMUSG00000057863	Rpl36	0.00472082	0.430705	1.04334	1.04334	1255.06	1202.92
Cnot6l	ENSMUSG00000034724	Cnot6l	0.004852	0.440514	0.919417	-1.08765	242.434	263.683
Rps3a1	ENSMUSG00000028081	Rps3a1	0.00493544	0.443982	1.0354	1.0354	1919.25	1853.63
Rps13	ENSMUSG00000090862	Rps13	0.00493791	0.443982	1.04072	1.04072	1385.9	1331.67
Dpp4	ENSMUSG00000035000	Dpp4	0.00510094	0.455831	0.903088	-1.10731	175.691	194.545
Mbnl1	ENSMUSG00000027763	Mbnl1	0.00511867	0.455831	0.9556	-1.04646	1005.94	1052.68
Ucp2	ENSMUSG00000033685	Ucp2	0.00524574	0.464922	1.06803	1.06803	450.102	421.432
Gm42031	ENSMUSG00000110386	Gm42031	0.0058907	0.51961	1.11889	1.11889	141.189	126.186
Gimap6	ENSMUSG00000047867	Gimap6	0.00599306	0.526145	0.939924	-1.06392	466.705	496.534
Cox7c	ENSMUSG00000017778	Cox7c	0.00623322	0.544661	1.09277	1.09277	203.977	186.66
Gimap5	ENSMUSG00000043505	Gimap5	0.00626512	0.54489	1.11004	1.11004	155.546	140.127
Fryl	ENSMUSG00000070733	Fryl	0.00634779	0.549512	0.913416	-1.09479	185.492	203.075
Serpinb1a	ENSMUSG00000044734	Serpinb1a	0.00671133	0.578293	1.07947	1.07947	343.403	318.123
Wasf2	ENSMUSG00000028868	Wasf2	0.00690958	0.590376	1.07073	1.07073	364.838	340.737
Gimap8	ENSMUSG00000064262	Gimap8	0.00691967	0.590376	1.08255	1.08255	279.941	258.594
Myadm	ENSMUSG00000068566	Myadm	0.00694672	0.590376	1.16878	1.16878	124.807	106.784
Ero1lb	ENSMUSG00000057069	.	0.00709482	0.600222	0.940856	-1.06286	524.338	557.299
Dipk1a	ENSMUSG00000029270	Dipk1a	0.00729086	0.614016	0.939961	-1.06387	497.35	529.117
Itgb7	ENSMUSG00000001281	Itgb7	0.00751477	0.630022	1.09013	1.09013	214.057	196.358
Sh3glb1	ENSMUSG00000037062	Sh3glb1	0.0076633	0.639593	0.926941	-1.07882	279.354	301.372
Pten	ENSMUSG00000013663	Pten	0.00778161	0.646569	1.0666	1.0666	403.287	378.104
Abhd17b	ENSMUSG00000047368	Abhd17b	0.00802387	0.663734	0.9408	-1.06293	487.034	517.681
Rpl13a	ENSMUSG00000074129	Rpl13a	0.00807495	0.663935	1.04399	1.04399	993.503	951.642
Rps14	ENSMUSG00000024608	Rps14	0.00812193	0.663935	1.05293	1.05293	634.282	602.397
Cacna1e	ENSMUSG00000004110	Cacna1e	0.00813331	0.663935	0.891137	-1.12216	169.335	190.021
Rhoq	ENSMUSG00000024143	Rhoq	0.00817309	0.664269	1.11491	1.11491	145.031	130.083
Rplp1	ENSMUSG00000007892	Rplp1	0.00832377	0.673574	1.04529	1.04529	953.587	912.271
Map3k1	ENSMUSG00000021754	Map3k1	0.00839538	0.676428	1.07741	1.07741	303.467	281.663
Ubac2	ENSMUSG00000041765	Ubac2	0.00859574	0.689586	0.920278	-1.08663	212.867	231.307
Snx30	ENSMUSG00000028385	Snx30	0.00875807	0.699593	1.07662	1.07662	298.761	277.499
Gmfg	ENSMUSG00000060791	Gmfg	0.00887097	0.704687	0.922168	-1.0844	219.287	237.795
Lyst	ENSMUSG00000019726	Lyst	0.00889756	0.704687	1.08671	1.08671	277.481	255.339
Blnk	ENSMUSG00000061132	Blnk	0.00910984	0.716324	0.953649	-1.0486	743.493	779.629
Setbp1	ENSMUSG00000024548	Setbp1	0.00912147	0.716324	1.08748	1.08748	352.163	323.834
Fam168b	ENSMUSG00000037503	Fam168b	0.00919891	0.71937	1.09105	1.09105	181.817	166.644
Rpl9	ENSMUSG00000047215	Rpl9	0.00940143	0.732132	1.03472	1.03472	1622.01	1567.59
Msn	ENSMUSG00000031207	Msn	0.00951403	0.737813	0.951237	-1.05126	617.089	648.723
Mgrn1	ENSMUSG00000022517	Mgrn1	0.0096727	0.743396	1.09329	1.09329	163.865	149.882
Cpm	ENSMUSG00000020183	Cpm	0.00969401	0.743396	1.10018	1.10018	222.504	202.243
Ubn1	ENSMUSG00000039473	Ubn1	0.00974376	0.743396	1.1114	1.1114	144.971	130.44
Lars2	ENSMUSG00000035202	Lars2	0.00974579	0.743396	1.10499	1.10499	412.542	373.345
Rpl37	ENSMUSG00000041841	Rpl37	0.00980212	0.744641	1.03611	1.03611	1636.1	1579.07
mt-Nd3	ENSMUSG00000064360	mt-Nd3	0.00986465	0.746345	1.09565	1.09565	160.525	146.512
Evl	ENSMUSG00000021262	Evl	0.0101293	0.761178	0.920773	-1.08604	199.176	216.314
Fau	ENSMUSG00000038274	Fau	0.0101425	0.761178	1.02688	1.02688	3891.24	3789.39
Dcaf8	ENSMUSG00000026554	Dcaf8	0.0105979	0.790847	0.915543	-1.09225	156.107	170.508
Ap1s3	ENSMUSG00000054702	Ap1s3	0.0106228	0.790847	1.09909	1.09909	163.85	149.077
Hsp90b1	ENSMUSG00000020048	Hsp90b1	0.0109001	0.808255	0.936443	-1.06787	387.524	413.825
Macf1	ENSMUSG00000028649	Macf1	0.0109683	0.810084	0.961955	-1.03955	1182.38	1229.15
Ppp1r16b	ENSMUSG00000037754	Ppp1r16b	0.011025	0.81106	0.915957	-1.09175	185.256	202.255
Srsf7	ENSMUSG00000024097	Srsf7	0.0112317	0.823008	1.05959	1.05959	445.255	420.213
5031425E22Rik	ENSMUSG00000073147	5031425E22Rik	0.0113433	0.827927	0.922736	-1.08373	205.896	223.136
Lsp1	ENSMUSG00000018819	Lsp1	0.0114973	0.82953	1.05607	1.05607	516.738	489.304
Fcrla	ENSMUSG00000038421	Fcrla	0.0114999	0.82953	0.929059	-1.07636	260.287	280.161
Gls	ENSMUSG00000026103	Gls	0.0115148	0.82953	0.922583	-1.08391	207.557	224.974
Tmsb10	ENSMUSG00000079523	Tmsb10	0.0117968	0.82953	1.03057	1.03057	2311.27	2242.71
Pnrc1	ENSMUSG00000040128	Pnrc1	0.0120726	0.82953	0.936978	-1.06726	335.916	358.51
Zup1	ENSMUSG00000039531	Zup1	0.0122553	0.82953	0.929688	-1.07563	295.135	317.456
Pak2	ENSMUSG00000022781	Pak2	0.0127443	0.82953	1.06702	1.06702	367.231	344.164
Phc2	ENSMUSG00000028796	Phc2	0.0129035	0.82953	1.10088	1.10088	151.482	137.6
Kynu	ENSMUSG00000026866	Kynu	0.0131171	0.82953	0.925293	-1.08074	291.777	315.335
Bank1	ENSMUSG00000037922	Bank1	0.0133898	0.82953	0.972208	-1.02859	3603.3	3706.3
Zeb2	ENSMUSG00000026872	Zeb2	0.0134848	0.82953	0.899138	-1.11218	177.41	197.311
Epb41	ENSMUSG00000028906	Epb41	0.0135074	0.82953	0.920507	-1.08636	205.503	223.25
Vps13b	ENSMUSG00000037646	Vps13b	0.0139422	0.82953	0.930979	-1.07414	286.836	308.102
Tma7	ENSMUSG00000091537	Tma7	0.0141443	0.82953	1.09711	1.09711	151.568	138.152
Rps11	ENSMUSG00000003429	Rps11	0.0142165	0.82953	1.03833	1.03833	1199.43	1155.16
Clic1	ENSMUSG00000007041	Clic1	0.0146003	0.82953	1.06417	1.06417	378.881	356.033
Dennd6a	ENSMUSG00000040818	Dennd6a	0.0146226	0.82953	1.08208	1.08208	238.162	220.096
Baz1a	ENSMUSG00000035021	Baz1a	0.0147522	0.82953	0.937481	-1.06669	332.51	354.684
Ahnak	ENSMUSG00000069833	Ahnak	0.0154487	0.82953	1.14628	1.14628	127.449	111.185
Morf4l1	ENSMUSG00000062270	Morf4l1	0.0157156	0.82953	0.942532	-1.06097	378.694	401.783
Srsf3	ENSMUSG00000071172	Srsf3	0.0157222	0.82953	1.07885	1.07885	227.338	210.722
Srrm1	ENSMUSG00000028809	Srrm1	0.0160463	0.82953	1.07288	1.07288	276.422	257.645
Dennd5b	ENSMUSG00000030313	Dennd5b	0.0166701	0.82953	0.928122	-1.07744	280.751	302.494
Ppp3ca	ENSMUSG00000028161	Ppp3ca	0.0168169	0.82953	0.958281	-1.04353	1063.88	1110.19
Klf13	ENSMUSG00000052040	Klf13	0.0173055	0.82953	1.08071	1.08071	202.877	187.725
Rps3	ENSMUSG00000030744	Rps3	0.017532	0.82953	1.03629	1.03629	1197.44	1155.5
Rapgef6	ENSMUSG00000037533	Rapgef6	0.017718	0.82953	0.948674	-1.0541	492.034	518.654
Rpl26	ENSMUSG00000060938	Rpl26	0.0179483	0.82953	1.04942	1.04942	626.413	596.916
Tsc22d4	ENSMUSG00000029723	Tsc22d4	0.01797	0.82953	1.07437	1.07437	264.109	245.827
Rpsa	ENSMUSG00000032518	Rpsa	0.018221	0.82953	0.971267	-1.02958	2366.67	2436.68
Brd4	ENSMUSG00000024002	Brd4	0.0183957	0.82953	1.07235	1.07235	254.387	237.225
Gnas	ENSMUSG00000027523	Gnas	0.0184784	0.82953	1.04888	1.04888	627.446	598.204
Hivep2	ENSMUSG00000015501	Hivep2	0.0186943	0.82953	0.933488	-1.07125	357.214	382.666
Nol7	ENSMUSG00000063200	Nol7	0.0190877	0.82953	1.08692	1.08692	170.171	156.563
Rpl14	ENSMUSG00000025794	Rpl14	0.0192826	0.82953	1.04833	1.04833	649.342	619.403
2023-03-01	ENSMUSG00000036469	.	0.0194884	0.82953	1.03783	1.03783	1427.11	1375.09
Xpr1	ENSMUSG00000026469	Xpr1	0.0195637	0.82953	1.08779	1.08779	188.785	173.55
Psmb8	ENSMUSG00000024338	Psmb8	0.0196473	0.82953	0.937407	-1.06677	305.149	325.524
Dhx15	ENSMUSG00000029169	Dhx15	0.0196742	0.82953	1.07541	1.07541	228.549	212.523
Aup1	ENSMUSG00000068328	Aup1	0.0197035	0.82953	1.08131	1.08131	175.211	162.036
Dyrk1a	ENSMUSG00000022897	Dyrk1a	0.0198192	0.82953	1.08307	1.08307	198.131	182.933
Gdi2	ENSMUSG00000021218	Gdi2	0.0200803	0.82953	0.945349	-1.05781	377.502	399.325
Phlpp1	ENSMUSG00000044340	Phlpp1	0.0201597	0.82953	0.905282	-1.10463	146.589	161.926
Rassf3	ENSMUSG00000025795	Rassf3	0.0202727	0.82953	1.08129	1.08129	187.023	172.963
Dapp1	ENSMUSG00000028159	Dapp1	0.0206595	0.82953	1.07093	1.07093	290.438	271.2
Trip12	ENSMUSG00000026219	Trip12	0.0213088	0.82953	0.930496	-1.0747	217.843	234.115
Celf2	ENSMUSG00000002107	Celf2	0.0218854	0.82953	1.05162	1.05162	576.086	547.809
Dazap2	ENSMUSG00000000346	Dazap2	0.022012	0.82953	0.932565	-1.07231	224.233	240.448
Pld4	ENSMUSG00000052160	Pld4	0.022123	0.82953	1.11105	1.11105	136.361	122.732
Cox8a	ENSMUSG00000035885	Cox8a	0.0222322	0.82953	1.07226	1.07226	258.039	240.649
Rpl27a	ENSMUSG00000046364	Rpl27a	0.022334	0.82953	1.03724	1.03724	1022.92	986.193
Myo1g	ENSMUSG00000020437	Myo1g	0.0224456	0.82953	1.09656	1.09656	145.911	133.063
Dgkd	ENSMUSG00000070738	Dgkd	0.0225386	0.82953	0.948535	-1.05426	458.581	483.463
Itch	ENSMUSG00000027598	Itch	0.0226639	0.82953	0.933118	-1.07168	247.823	265.585
Gpd2	ENSMUSG00000026827	Gpd2	0.0228009	0.82953	1.10578	1.10578	137.874	124.685
Rps23	ENSMUSG00000049517	Rps23	0.0234262	0.82953	1.04283	1.04283	736.018	705.788
R3hdm1	ENSMUSG00000056211	R3hdm1	0.0234268	0.82953	0.926151	-1.07974	190.499	205.688
Grap2	ENSMUSG00000042351	Grap2	0.023572	0.82953	0.936405	-1.06791	299.551	319.895
H2-T22	ENSMUSG00000056116	H2-T22	0.0365064	0.82953	0.932475	-1.07242	166.86	178.943
Ywhaz	ENSMUSG00000022285	Ywhaz	0.0238306	0.82953	1.04528	1.04528	629.904	602.618
Il2rg	ENSMUSG00000031304	Il2rg	0.0243312	0.82953	0.954477	-1.04769	537.573	563.212
Jarid2	ENSMUSG00000038518	Jarid2	0.0245568	0.82953	0.923408	-1.08294	185.297	200.667
Pxk	ENSMUSG00000033885	Pxk	0.0247764	0.82953	1.04742	1.04742	608.779	581.216
Pdia4	ENSMUSG00000025823	Pdia4	0.0249546	0.82953	0.919627	-1.0874	142.001	154.411
Cybb	ENSMUSG00000015340	Cybb	0.02523	0.82953	0.928586	-1.07691	246.202	265.136
Arf4	ENSMUSG00000021877	Arf4	0.0254939	0.82953	0.926864	-1.07891	161.533	174.28
Mob1a	ENSMUSG00000043131	Mob1a	0.02553	0.82953	1.09939	1.09939	138.546	126.021
St6galnac3	ENSMUSG00000052544	St6galnac3	0.0255887	0.82953	0.908911	-1.10022	191.458	210.646
Trnt1	ENSMUSG00000013736	Trnt1	0.0259378	0.82953	1.12263	1.12263	126.564	112.739
Tubb5	ENSMUSG00000001525	Tubb5	0.0261331	0.82953	1.07148	1.07148	237.038	221.224
Camk2d	ENSMUSG00000053819	Camk2d	0.0262886	0.82953	0.951999	-1.05042	543.595	571.004
Pbrm1	ENSMUSG00000042323	Pbrm1	0.0266725	0.82953	1.0801	1.0801	189.827	175.749
Cyb561a3	ENSMUSG00000034445	Cyb561a3	0.0266834	0.82953	1.06861	1.06861	254.872	238.507
H2-Ke6	ENSMUSG00000073422	H2-Ke6	0.026768	0.82953	1.08836	1.08836	146.294	134.417
Tax1bp1	ENSMUSG00000004535	Tax1bp1	0.0268734	0.82953	0.947633	-1.05526	399.033	421.084
Sypl	ENSMUSG00000020570	Sypl	0.027341	0.82953	0.933866	-1.07082	224.7	240.613
Ms4a4c	ENSMUSG00000024675	Ms4a4c	0.0274136	0.82953	0.942435	-1.06108	375.844	398.801
Btg1	ENSMUSG00000036478	Btg1	0.0274189	0.82953	0.961024	-1.04056	777.193	808.713
Lcor	ENSMUSG00000025019	Lcor	0.0277761	0.82953	1.07462	1.07462	234.619	218.328
Prrc2c	ENSMUSG00000040225	Prrc2c	0.0283322	0.82953	0.945745	-1.05737	370.26	391.501
Smg1	ENSMUSG00000030655	Smg1	0.0283893	0.82953	0.944184	-1.05912	331.409	351.001
Ndufa3	ENSMUSG00000035674	Ndufa3	0.0284673	0.82953	1.08497	1.08497	155.79	143.59
Chst3	ENSMUSG00000057337	Chst3	0.0291302	0.82953	1.08177	1.08177	187.236	173.083
Zc3h7a	ENSMUSG00000037965	Zc3h7a	0.0291846	0.82953	1.07407	1.07407	220.05	204.875
Nr3c1	ENSMUSG00000024431	Nr3c1	0.0293004	0.82953	1.05771	1.05771	406.747	384.554
Tbc1d5	ENSMUSG00000023923	Tbc1d5	0.0294817	0.82953	0.937844	-1.06628	345.526	368.425
Ddx39b	ENSMUSG00000019432	Ddx39b	0.0296009	0.82953	1.06912	1.06912	229.33	214.502
Reep5	ENSMUSG00000005873	Reep5	0.0297998	0.82953	1.07942	1.07942	174.437	161.603
Rab3ip	ENSMUSG00000064181	Rab3ip	0.0299479	0.82953	1.11867	1.11867	126.873	113.414
Traf3	ENSMUSG00000021277	Traf3	0.0300789	0.82953	1.07099	1.07099	254.924	238.027
Bcar3	ENSMUSG00000028121	Bcar3	0.0304649	0.82953	0.931218	-1.07386	269.685	289.604
Srsf2	ENSMUSG00000034120	Srsf2	0.030465	0.82953	1.07422	1.07422	189.719	176.61
Slc10a7	ENSMUSG00000031684	Slc10a7	0.0310269	0.82953	0.921331	-1.08539	152.242	165.241
mt-Nd5	ENSMUSG00000064367	mt-Nd5	0.031367	0.82953	1.04675	1.04675	596.723	570.07
Mapk14	ENSMUSG00000053436	Mapk14	0.0314247	0.82953	1.09017	1.09017	145.035	133.039
Apc	ENSMUSG00000005871	Apc	0.0316111	0.82953	1.06657	1.06657	285.44	267.625
Pole4	ENSMUSG00000030042	Pole4	0.0316702	0.82953	1.0841	1.0841	155.51	143.445
Tgfb1	ENSMUSG00000002603	Tgfb1	0.0321552	0.82953	1.05892	1.05892	345.67	326.438
Akt3	ENSMUSG00000019699	Akt3	0.0321702	0.82953	0.948175	-1.05466	432.183	455.805
Atp6v0b	ENSMUSG00000033379	Atp6v0b	0.0324293	0.82953	1.06328	1.06328	296.624	278.97
Utrn	ENSMUSG00000019820	Utrn	0.0325648	0.82953	0.915593	-1.09219	139.911	152.809
Itm2b	ENSMUSG00000022108	Itm2b	0.0326059	0.82953	0.954203	-1.048	469.406	491.935
Rps17	ENSMUSG00000061787	Rps17	0.0327527	0.82953	1.07229	1.07229	207.363	193.383
Sec61b	ENSMUSG00000053317	Sec61b	0.0327794	0.82953	1.09816	1.09816	134.877	122.821
Pkn1	ENSMUSG00000057672	Pkn1	0.0332788	0.82953	1.07268	1.07268	196.07	182.784
Zbtb20	ENSMUSG00000022708	Zbtb20	0.0333351	0.82953	0.95285	-1.04948	615.435	645.888
Psmb1	ENSMUSG00000014769	Psmb1	0.0338256	0.82953	1.07676	1.07676	166.751	154.863
Pik3cd	ENSMUSG00000039936	Pik3cd	0.0343879	0.82953	0.926941	-1.07882	158.235	170.706
Elob	ENSMUSG00000055839	Elob	0.0348884	0.82953	1.07992	1.07992	172.864	160.071
Atp5j	ENSMUSG00000022890	Atp5j	0.034923	0.82953	1.09141	1.09141	143.972	131.914
Ifi30	ENSMUSG00000031838	Ifi30	0.0349932	0.82953	1.06991	1.06991	270.942	253.238
Actr3	ENSMUSG00000026341	Actr3	0.0352178	0.82953	1.03664	1.03664	845.569	815.681
Son	ENSMUSG00000022961	Son	0.0352306	0.82953	0.959042	-1.04271	563.621	587.692
Ghitm	ENSMUSG00000041028	Ghitm	0.0360391	0.82953	1.08389	1.08389	149.884	138.283
Tmem163	ENSMUSG00000026347	Tmem163	0.0360465	0.82953	0.946534	-1.05649	500.822	529.111
Arhgef6	ENSMUSG00000031133	Arhgef6	0.0361908	0.82953	0.930033	-1.07523	173.451	186.5
Rpl21	ENSMUSG00000041453	Rpl21	0.0362929	0.82953	1.02521	1.02521	2179.2	2125.63
Hsp90ab1	ENSMUSG00000023944	Hsp90ab1	2.75752e-08	1.38711e-05	1.10925	1.10925	947.237	853.946
Dok3	ENSMUSG00000035711	Dok3	0.0369951	0.82953	0.940916	-1.06279	251.865	267.681
Aldh2	ENSMUSG00000029455	Aldh2	0.0372655	0.82953	0.93805	-1.06604	222.603	237.304
Snx9	ENSMUSG00000002365	Snx9	0.0380618	0.82953	0.948211	-1.05462	355.822	375.256
Ly86	ENSMUSG00000021423	Ly86	0.0381364	0.82953	1.04786	1.04786	528.847	504.691
Tor1aip1	ENSMUSG00000026466	Tor1aip1	0.0383151	0.82953	0.932997	-1.07181	188.2	201.715
P2ry10	ENSMUSG00000050921	P2ry10	0.0389058	0.82953	0.931376	-1.07368	183.277	196.78
Cd79a	ENSMUSG00000003379	Cd79a	0.0390986	0.82953	0.978109	-1.02238	2669.65	2729.4
Zfp91	ENSMUSG00000024695	Zfp91	0.0391258	0.82953	1.07528	1.07528	179.438	166.876
Sub1	ENSMUSG00000022205	Sub1	0.0393136	0.82953	1.06455	1.06455	244.59	229.758
Snrnp48	ENSMUSG00000021431	Snrnp48	0.0398834	0.82953	1.07552	1.07552	160.084	148.843
Anxa6	ENSMUSG00000018340	Anxa6	0.0403892	0.82953	1.08622	1.08622	144.789	133.297
Susd6	ENSMUSG00000021133	Susd6	0.0406058	0.82953	0.940716	-1.06302	262.611	279.161
Abca1	ENSMUSG00000015243	Abca1	0.0408038	0.82953	0.926862	-1.07891	171.952	185.521
Kdm3b	ENSMUSG00000038773	Kdm3b	0.0415811	0.82953	1.06718	1.06718	229.865	215.393
Phip	ENSMUSG00000032253	Phip	0.0416002	0.82953	0.950258	-1.05235	415.444	437.191
Capza2	ENSMUSG00000015733	Capza2	0.0416236	0.82953	1.07047	1.07047	186.637	174.351
Hspe1	ENSMUSG00000073676	Hspe1	0.0416421	0.82953	1.10504	1.10504	126.531	114.504
Rbm25	ENSMUSG00000010608	Rbm25	0.0417592	0.82953	0.945753	-1.05736	318.072	336.316
Gimap7	ENSMUSG00000043931	Gimap7	0.0417843	0.82953	1.07577	1.07577	168.163	156.319
Tmem243	ENSMUSG00000079659	Tmem243	0.0419673	0.82953	1.05707	1.05707	332.356	314.414
Top1	ENSMUSG00000070544	Top1	0.0419832	0.82953	0.928698	-1.07678	158.593	170.769
Sorl1	ENSMUSG00000049313	Sorl1	0.0420075	0.82953	1.05699	1.05699	352.884	333.859
Ube2w	ENSMUSG00000025939	Ube2w	0.0421245	0.82953	1.0777	1.0777	161.354	149.721
Rps15	ENSMUSG00000063457	Rps15	0.0421743	0.82953	1.0521	1.0521	387.898	368.69
Aff3	ENSMUSG00000037138	Aff3	0.0421879	0.82953	1.03139	1.03139	1537.18	1490.4
Lpgat1	ENSMUSG00000026623	Lpgat1	0.042374	0.82953	1.05947	1.05947	291.646	275.275
Cbx1	ENSMUSG00000018666	Cbx1	0.0424222	0.82953	1.08064	1.08064	152.564	141.179
Ndufa6	ENSMUSG00000022450	Ndufa6	0.0424438	0.82953	1.09147	1.09147	136.088	124.683
AC149090.1	ENSMUSG00000095041	.	0.0427515	0.82953	1.06873	1.06873	292.268	273.472
Ssbp2	ENSMUSG00000003992	Ssbp2	0.0428884	0.82953	1.10524	1.10524	144.456	130.701
Cog5	ENSMUSG00000035933	Cog5	0.0431451	0.82953	0.92792	-1.07768	163.913	176.646
Gpx1	ENSMUSG00000063856	Gpx1	0.0435222	0.82953	1.05571	1.05571	363.212	344.044
Gnb2	ENSMUSG00000029713	Gnb2	0.0436551	0.82953	1.06313	1.06313	237.094	223.015
Ankrd44	ENSMUSG00000052331	Ankrd44	0.0437471	0.82953	1.04018	1.04018	704.52	677.308
Ggnbp2	ENSMUSG00000020530	Ggnbp2	0.0438225	0.82953	1.06446	1.06446	242.101	227.439
Fgd2	ENSMUSG00000024013	Fgd2	0.0442665	0.82953	1.09099	1.09099	141.522	129.719
Rab3gap1	ENSMUSG00000036104	Rab3gap1	0.0443217	0.82953	1.06604	1.06604	216.692	203.268
Arhgef3	ENSMUSG00000021895	Arhgef3	0.0444471	0.82953	1.05376	1.05376	403.367	382.789
Ttc7	ENSMUSG00000036918	Ttc7	0.044699	0.82953	1.07683	1.07683	163.964	152.265
Tecr	ENSMUSG00000031708	Tecr	0.0447724	0.82953	1.0739	1.0739	159.341	148.376
Nsd1	ENSMUSG00000021488	Nsd1	0.0447884	0.82953	0.952813	-1.04952	392.258	411.685
Nxpe3	ENSMUSG00000075033	Nxpe3	0.0448016	0.82953	0.935277	-1.0692	194.864	208.348
Rnf44	ENSMUSG00000034928	Rnf44	0.045252	0.82953	1.09166	1.09166	133.245	122.057
Cd86	ENSMUSG00000022901	Cd86	0.0454871	0.82953	0.896828	-1.11504	112.481	125.421
Ddx6	ENSMUSG00000032097	Ddx6	0.0456274	0.82953	1.04577	1.04577	486.676	465.378
Mndal	ENSMUSG00000090272	Mndal	0.0456623	0.82953	0.95769	-1.04418	613.209	640.3
Dusp11	ENSMUSG00000030002	Dusp11	0.0462404	0.82953	1.05937	1.05937	276.335	260.848
Akap8	ENSMUSG00000024045	Akap8	0.0465736	0.82953	1.07009	1.07009	162.467	151.825
Slc4a7	ENSMUSG00000021733	Slc4a7	0.0465894	0.82953	0.94514	-1.05804	317.765	336.209
Hspa5	ENSMUSG00000026864	Hspa5	0.000166621	0.0314571	0.894722	-1.11767	276.564	309.106
2410006H16Rik	ENSMUSG00000086841	2410006H16Rik	0.0477133	0.82953	1.06596	1.06596	205.535	192.816
Ddx17	ENSMUSG00000055065	Ddx17	0.0480946	0.82953	1.0636	1.0636	232.774	218.854
Thrap3	ENSMUSG00000043962	Thrap3	0.0484048	0.82953	0.941961	-1.06162	232.607	246.94
Ccdc50	ENSMUSG00000038127	Ccdc50	0.0488137	0.82953	1.05875	1.05875	298.393	281.837
Arhgap17	ENSMUSG00000030766	Arhgap17	0.0488216	0.82953	0.953309	-1.04898	386.061	404.97
Sptbn1	ENSMUSG00000020315	Sptbn1	0.0495364	0.82953	1.05705	1.05705	317.143	300.028
Hint1	ENSMUSG00000020267	Hint1	0.049542	0.82953	1.07395	1.07395	159.4	148.424
Pml	ENSMUSG00000036986	Pml	0.0496716	0.82953	0.936839	-1.06742	203.048	216.738

## Sheet: Blood_Follicular_New MI vs sham
Gene ID	Ensembl ID	Gene name	P-value	FDR step up	Ratio	Fold change	LSMean(recentMI)	LSMean(sham)		Genes differentially expressed in antigen processing and presentation
2010309G21Rik	ENSMUSG00000106567	2010309G21Rik	0.000268664	0.0675726	0.88254	-1.13309	273.63	310.048		Gene Symbol	Gene Description
4930523C07Rik	ENSMUSG00000090394	4930523C07Rik	7.4795e-06	0.00280789	1.10826	1.10826	520.488	469.643		HSPA8	heat shock protein family A (Hsp70) member 8
4933406I18Rik	ENSMUSG00000087475	4933406I18Rik	8.77385e-06	0.00314036	0.776587	-1.28768	128.407	165.347		HSP90AA1	heat shock protein 90 alpha family class A member 1
Abca1	ENSMUSG00000015243	Abca1	0.000534161	0.116962	0.878899	-1.13779	163.054	185.521		HSP90AB1	heat shock protein 90 alpha family class B member 1
Ablim1	ENSMUSG00000025085	Ablim1	0.0238931	0.999977	0.956043	-1.04598	608.56	636.541		HLA-A	major histocompatibility complex, class I, A
Actb	ENSMUSG00000029580	Actb	0.00543281	0.666049	0.970543	-1.03035	3549.84	3657.58		HLA-B	major histocompatibility complex, class I, B
Actg1	ENSMUSG00000062825	Actg1	9.65575e-05	0.0280801	0.931244	-1.07383	989.238	1062.28		PSME1	proteasome activator subunit 1
Actr2	ENSMUSG00000020152	Actr2	0.00405635	0.547078	1.06779	1.06779	437.666	409.882
Adamts6	ENSMUSG00000046169	Adamts6	0.0303963	0.999977	1.09289	1.09289	186.851	170.969
Adgre5	ENSMUSG00000002885	Adgre5	0.00443898	0.585945	1.09405	1.09405	282.564	258.273
Aff4	ENSMUSG00000049470	Aff4	0.00402712	0.547078	0.934692	-1.06987	459.939	492.075
Ahnak	ENSMUSG00000069833	Ahnak	0.027946	0.999977	1.1324	1.1324	125.906	111.185
Aim2	ENSMUSG00000037860	Aim2	0.0384395	0.999977	0.931307	-1.07376	169.058	181.527
Akap13	ENSMUSG00000066406	Akap13	1.93508e-05	0.00654832	1.07928	1.07928	976.741	904.989
Akap8	ENSMUSG00000024045	Akap8	0.0234328	0.999977	1.08036	1.08036	164.026	151.825
Ap1s3	ENSMUSG00000054702	Ap1s3	0.0288157	0.999977	1.08445	1.08445	161.667	149.077
Apbb1ip	ENSMUSG00000026786	Apbb1ip	3.94005e-11	4.28522e-08	1.14878	1.14878	723.97	630.209
Apoe	ENSMUSG00000002985	Apoe	0.0363045	0.999977	0.907302	-1.10217	143.104	157.725
Arap2	ENSMUSG00000037999	Arap2	1.78447e-06	0.000790776	1.15078	1.15078	320.765	278.736
Arhgap15	ENSMUSG00000049744	Arhgap15	3.89529e-07	0.000195944	1.07041	1.07041	2565.65	2396.89
Arhgap17	ENSMUSG00000030766	Arhgap17	0.0017498	0.301548	0.926928	-1.07883	375.378	404.97
Arhgap25	ENSMUSG00000030047	Arhgap25	0.00253069	0.383163	0.909664	-1.09931	207.299	227.886
Arhgap4	ENSMUSG00000031389	Arhgap4	0.00782207	0.871762	0.917159	-1.09032	188.521	205.549
Arhgap45	ENSMUSG00000035697	Arhgap45	8.08126e-09	5.01361e-06	0.899658	-1.11153	657.369	730.687
Arhgdib	ENSMUSG00000030220	Arhgdib	0.00165856	0.288595	0.950401	-1.05219	933.923	982.663
Arhgef1	ENSMUSG00000040940	Arhgef1	0.000312766	0.0776161	0.929462	-1.07589	550.941	592.752
Arl5c	ENSMUSG00000038352	Arl5c	0.0465896	0.999977	0.906874	-1.10269	118.346	130.498
Atf7ip	ENSMUSG00000030213	Atf7ip	0.0276492	0.999977	0.94004	-1.06378	331.666	352.821
Atp2a3	ENSMUSG00000020788	Atp2a3	0.00349746	0.491292	0.91077	-1.09797	205.092	225.185
Atp2b1	ENSMUSG00000019943	Atp2b1	9.68774e-11	9.4899e-08	1.20235	1.20235	418.201	347.821
AU020206	ENSMUSG00000097415	AU020206	0.000450538	0.101029	1.12467	1.12467	232.353	206.597
B3gnt2	ENSMUSG00000051650	B3gnt2	0.0413683	0.999977	1.06416	1.06416	244.863	230.101
B4galnt1	ENSMUSG00000006731	B4galnt1	0.036127	0.999977	1.06517	1.06517	268.945	252.489
Baz1a	ENSMUSG00000035021	Baz1a	0.000244284	0.0622823	0.907422	-1.10202	321.849	354.684
Bcar3	ENSMUSG00000028121	Bcar3	0.000627678	0.133698	1.1154	1.1154	323.025	289.604
BE692007	ENSMUSG00000099757	BE692007	4.34775e-06	0.00175914	0.91269	-1.09566	757.829	830.325
Birc3	ENSMUSG00000032000	Birc3	6.27207e-05	0.019456	1.09206	1.09206	555.403	508.583
Blnk	ENSMUSG00000061132	Blnk	0.0298016	0.999977	0.961551	-1.03999	749.653	779.629
Bptf	ENSMUSG00000040481	Bptf	0.0453662	0.999977	0.949216	-1.0535	336.512	354.516
Btaf1	ENSMUSG00000040565	Btaf1	0.00633207	0.760339	1.11105	1.11105	154.377	138.946
Calhm2	ENSMUSG00000033033	Calhm2	0.00511583	0.641769	0.902667	-1.10783	137.051	151.829
Camk2d	ENSMUSG00000053819	Camk2d	0.0247001	0.999977	0.95177	-1.05067	543.464	571.004
Capza2	ENSMUSG00000015733	Capza2	0.00449402	0.589033	1.09943	1.09943	191.687	174.351
Ccm2	ENSMUSG00000000378	Ccm2	0.00121684	0.230618	0.913309	-1.09492	271.234	296.98
Ccnd3	ENSMUSG00000034165	Ccnd3	9.72314e-19	2.26209e-15	1.24676	1.24676	524.03	420.313
Ccr7	ENSMUSG00000037944	Ccr7	0.000412923	0.0960666	1.09293	1.09293	477.952	437.313
Cd19	ENSMUSG00000030724	Cd19	0.00621567	0.751208	0.946896	-1.05608	544.37	574.9
Cd52	ENSMUSG00000000682	Cd52	1.67622e-05	0.00577739	0.932404	-1.0725	952.754	1021.83
Cd69	ENSMUSG00000030156	Cd69	6.79792e-35	5.76395e-31	1.45712	1.45712	470.338	322.785
Cd72	ENSMUSG00000028459	Cd72	0.0008175	0.167201	0.88862	-1.12534	167.482	188.474
Cd79a	ENSMUSG00000003379	Cd79a	3.70902e-15	6.27566e-12	0.918594	-1.08862	2507.21	2729.4
Cd79b	ENSMUSG00000040592	Cd79b	4.90123e-06	0.00194089	0.940191	-1.06361	1502.03	1597.58
Cd81	ENSMUSG00000037706	Cd81	0.0138549	0.999977	1.07777	1.07777	239.247	221.983
Cd83	ENSMUSG00000015396	Cd83	1.50819e-10	1.33668e-07	1.29153	1.29153	263.086	203.701
Cd84	ENSMUSG00000038147	Cd84	0.0128393	0.999977	0.925656	-1.08032	242.461	261.934
Cdkn1b	ENSMUSG00000003031	Cdkn1b	0.00104404	0.204543	0.912029	-1.09646	260.212	285.311
Clec2d	ENSMUSG00000030157	Clec2d	0.0444612	0.999977	0.946384	-1.05665	342.611	362.021
Clec2i	ENSMUSG00000030365	Clec2i	2.1813e-05	0.00712253	0.865245	-1.15574	191.403	221.212
Cnot2	ENSMUSG00000020166	Cnot2	0.00468796	0.605919	0.921256	-1.08547	258.775	280.893
Cobll1	ENSMUSG00000034903	Cobll1	0.00232033	0.359883	1.1218	1.1218	189.142	168.606
Cpm	ENSMUSG00000020183	Cpm	0.000110477	0.0311545	1.15232	1.15232	233.048	202.243
Crebrf	ENSMUSG00000048249	Crebrf	0.0105122	0.999977	1.08117	1.08117	251.746	232.847
Csk	ENSMUSG00000032312	Csk	0.0462827	0.999977	0.950638	-1.05193	329.877	347.006
Cxcr5	ENSMUSG00000047880	Cxcr5	0.000236547	0.0611474	1.11476	1.11476	287.122	257.564
Cyp4f18	ENSMUSG00000003484	Cyp4f18	0.00149687	0.273135	0.896381	-1.1156	173.455	193.506
Cyth1	ENSMUSG00000017132	Cyth1	0.00812094	0.8839	0.933	-1.07181	336.2	360.343
Cytip	ENSMUSG00000026832	Cytip	1.52484e-15	2.83803e-12	1.17586	1.17586	697.991	593.6
Dapp1	ENSMUSG00000028159	Dapp1	0.00253219	0.383163	1.09266	1.09266	296.329	271.2
Ddx5	ENSMUSG00000020719	Ddx5	0.00478773	0.612169	0.960931	-1.04066	1280.24	1332.29
Ddx6	ENSMUSG00000032097	Ddx6	0.0112404	0.999977	1.05784	1.05784	492.294	465.378
Dennd4a	ENSMUSG00000053641	Dennd4a	8.14888e-29	3.79167e-25	1.29352	1.29352	895.572	692.354
Dennd5b	ENSMUSG00000030313	Dennd5b	0.0469269	0.999977	0.940349	-1.06343	284.45	302.494
Dhx40	ENSMUSG00000018425	Dhx40	3.06713e-05	0.00984233	1.17086	1.17086	192.018	163.998
Dleu2	ENSMUSG00000097589	Dleu2	0.0217204	0.999977	0.924789	-1.08133	252.564	273.105
Dmac2	ENSMUSG00000057229	Dmac2	0.0426601	0.999977	0.921024	-1.08575	131.019	142.253
Dnaja1	ENSMUSG00000028410	Dnaja1	0.0106184	0.999977	0.925411	-1.0806	243.132	262.729
Dnajc7	ENSMUSG00000014195	Dnajc7	0.0422193	0.999977	0.945746	-1.05737	286.744	303.194
Dock2	ENSMUSG00000020143	Dock2	0.00731125	0.834843	1.03656	1.03656	3584.45	3458.04
Dok3	ENSMUSG00000035711	Dok3	2.98563e-09	2.05809e-06	0.838688	-1.19234	224.501	267.681
Dpp4	ENSMUSG00000035000	Dpp4	0.00745008	0.840369	0.90705	-1.10247	176.462	194.545
Eef1b2	ENSMUSG00000025967	Eef1b2	0.0114474	0.999977	1.06964	1.06964	342.086	319.815
Eif1	ENSMUSG00000035530	Eif1	0.0136835	0.999977	0.959908	-1.04177	876.614	913.227
Etnk1	ENSMUSG00000030275	Etnk1	0.0244009	0.999977	1.0541	1.0541	442.824	420.096
Ets1	ENSMUSG00000032035	Ets1	8.20356e-22	2.54474e-18	1.15518	1.15518	1401.68	1213.39
Evl	ENSMUSG00000021262	Evl	0.00323846	0.463647	0.909824	-1.09911	196.807	216.314
F730311O21Rik	ENSMUSG00000100658	F730311O21Rik	0.00117658	0.225758	0.894302	-1.11819	152.236	170.229
Fam107b	ENSMUSG00000026655	Fam107b	8.4396e-06	0.00307996	1.10622	1.10622	533.142	481.95
Fau	ENSMUSG00000038274	Fau	0.00694172	0.812575	0.972416	-1.02837	3684.87	3789.39
Fbxo11	ENSMUSG00000005371	Fbxo11	0.0128416	0.999977	1.09012	1.09012	221.761	203.427
Fcer2a	ENSMUSG00000005540	Fcer2a	0.000176635	0.0476453	0.930292	-1.07493	896.029	963.169
Fchsd2	ENSMUSG00000030691	Fchsd2	0.0128791	0.999977	1.04267	1.04267	1722.52	1652.02
Fcrla	ENSMUSG00000038421	Fcrla	0.000124571	0.0346046	0.894128	-1.11841	250.5	280.161
Fermt3	ENSMUSG00000024965	Fermt3	0.00514262	0.641769	0.90849	-1.10073	172.859	190.271
Fos	ENSMUSG00000021250	Fos	0.00991546	0.999977	1.16847	1.16847	131.88	112.866
Foxn3	ENSMUSG00000033713	Foxn3	1.18255e-06	0.000550241	1.09738	1.09738	881.389	803.179
Foxp1	ENSMUSG00000030067	Foxp1	0.0375152	0.999977	1.02674	1.02674	3158.28	3076.03
Fus	ENSMUSG00000030795	Fus	1.52583e-07	8.11394e-05	1.12598	1.12598	507.15	450.409
Gdi1	ENSMUSG00000015291	Gdi1	0.0155518	0.999977	0.924757	-1.08136	176.492	190.852
Gdi2	ENSMUSG00000021218	Gdi2	0.0320947	0.999977	0.949941	-1.0527	379.336	399.325
Gga2	ENSMUSG00000030872	Gga2	0.0154828	0.999977	0.929437	-1.07592	227.805	245.1
Gm11342	ENSMUSG00000084788	Gm11342	0.010847	0.999977	0.902131	-1.10849	146.33	162.205
Gm20559	ENSMUSG00000106734	Gm20559	0.00122669	0.230618	0.910567	-1.09822	281.299	308.927
Gm26740	ENSMUSG00000097705	Gm26740	7.54322e-06	0.00280789	0.922977	-1.08345	849.223	920.092
Gm30054	ENSMUSG00000114937	Gm30054	0.00468743	0.605919	0.908654	-1.10053	197.486	217.339
Gm42031	ENSMUSG00000110386	Gm42031	0.00165913	0.288595	1.13736	1.13736	143.519	126.186
Gm43305	ENSMUSG00000105703	Gm43305	9.2907e-35	5.76395e-31	1.27971	1.27971	1633.53	1276.48
Gm45552	ENSMUSG00000110279	Gm45552	0.00618446	0.751208	0.885797	-1.12893	119.77	135.211
Gmfg	ENSMUSG00000060791	Gmfg	0.0215234	0.999977	0.931641	-1.07337	221.54	237.795
Gnai3	ENSMUSG00000000001	Gnai3	0.0120157	0.999977	0.911568	-1.09701	139.527	153.063
Gpcpd1	ENSMUSG00000027346	Gpcpd1	0.00201748	0.334175	1.08798	1.08798	370.318	340.372
Gpr18	ENSMUSG00000050350	Gpr18	0.0175113	0.999977	0.931189	-1.0739	247.313	265.588
Gpr183	ENSMUSG00000051212	Gpr183	1.53715e-05	0.005398	1.12203	1.12203	451.614	402.498
Gps2	ENSMUSG00000023170	Gps2	0.0112261	0.999977	0.921308	-1.08541	191.515	207.873
Gpsm3	ENSMUSG00000034786	Gpsm3	0.00955509	0.999977	0.918584	-1.08863	170.078	185.152
Gpx1	ENSMUSG00000063856	Gpx1	0.0200009	0.999977	0.938415	-1.06563	322.856	344.044
Grap2	ENSMUSG00000042351	Grap2	7.11754e-05	0.0213664	0.890701	-1.12271	284.931	319.895
H2-D1	ENSMUSG00000073411	H2-D1	2.40979e-12	2.99007e-09	0.921045	-1.08572	1880.98	2042.23
H2-K1	ENSMUSG00000061232	H2-K1	2.11024e-05	0.00701355	0.939785	-1.06407	1260.57	1341.34
H2-Q4	ENSMUSG00000035929	H2-Q4	0.0158991	0.999977	0.92529	-1.08074	188.156	203.349
H3f3b	ENSMUSG00000016559	H3f3b	0.00708283	0.823911	1.04676	1.04676	902.507	862.187
Herc4	ENSMUSG00000020064	Herc4	0.00221736	0.35273	1.07883	1.07883	444.718	412.223
Hipk1	ENSMUSG00000008730	Hipk1	0.0214686	0.999977	1.07762	1.07762	217.94	202.242
Hivep2	ENSMUSG00000015501	Hivep2	0.001565	0.280076	0.911645	-1.09692	348.856	382.666
Hnrnpa0	ENSMUSG00000007836	Hnrnpa0	0.0170997	0.999977	1.07929	1.07929	205.01	189.95
Hnrnpa2b1	ENSMUSG00000004980	Hnrnpa2b1	0.0113166	0.999977	0.964565	-1.03674	1156.65	1199.14
Hnrnpm	ENSMUSG00000059208	Hnrnpm	0.0398284	0.999977	1.06738	1.06738	209.946	196.693
Hnrnpul2	ENSMUSG00000071659	Hnrnpul2	0.00761697	0.854018	0.923444	-1.0829	234.832	254.3
Hsp90aa1	ENSMUSG00000021270	Hsp90aa1	0.00224457	0.354033	0.890104	-1.12346	144.073	161.861
Hsp90ab1	ENSMUSG00000023944	Hsp90ab1	2.99075e-06	0.00126509	0.914214	-1.09384	780.689	853.946
Hspa8	ENSMUSG00000015656	Hspa8	0.00114217	0.221438	0.941082	-1.06261	755.137	802.414
Id3	ENSMUSG00000007872	Id3	0.000412851	0.0960666	0.866173	-1.1545	135.424	156.347
Ier2	ENSMUSG00000053560	Ier2	0.00735538	0.834843	0.911172	-1.09749	171.875	188.631
Ighd	ENSMUSG00000104213	Ighd	0.00653138	0.774281	0.948255	-1.05457	627.518	661.761
Iglc2	ENSMUSG00000076937	Iglc2	0.000197068	0.0523975	0.932753	-1.0721	757.199	811.789
Iglc3	ENSMUSG00000105547	Iglc3	0.0358341	0.999977	0.959009	-1.04274	652.617	680.512
Ikbkb	ENSMUSG00000031537	Ikbkb	0.0188458	0.999977	1.07038	1.07038	273.419	255.441
Ikzf1	ENSMUSG00000018654	Ikzf1	0.0178263	0.999977	0.941936	-1.06164	445.515	472.978
Ikzf3	ENSMUSG00000018168	Ikzf3	0.00351074	0.491292	0.952323	-1.05006	1019.63	1070.68
Il16	ENSMUSG00000001741	Il16	0.0335595	0.999977	0.944513	-1.05875	296.56	313.982
Il21r	ENSMUSG00000030745	Il21r	0.0290027	0.999977	0.92777	-1.07785	176.428	190.163
Immp2l	ENSMUSG00000056899	Immp2l	0.000381965	0.0923265	1.09367	1.09367	824.729	754.09
Inpp4b	ENSMUSG00000037940	Inpp4b	0.0417296	0.999977	1.05358	1.05358	859.966	816.231
Insr	ENSMUSG00000005534	Insr	0.0426347	0.999977	1.08366	1.08366	155.669	143.651
Irf5	ENSMUSG00000029771	Irf5	0.0200264	0.999977	0.925871	-1.08006	170.038	183.651
Itga4	ENSMUSG00000027009	Itga4	1.00664e-08	6.04372e-06	1.12693	1.12693	779.042	691.297
Jak1	ENSMUSG00000028530	Jak1	0.0003518	0.0861539	0.933647	-1.07107	632.121	677.045
Jak2	ENSMUSG00000024789	Jak2	0.00063214	0.133698	1.12853	1.12853	190.666	168.951
Jarid2	ENSMUSG00000038518	Jarid2	0.0174889	0.999977	0.919137	-1.08798	184.44	200.667
Jmjd1c	ENSMUSG00000037876	Jmjd1c	0.00432028	0.57435	1.08908	1.08908	300.337	275.772
Junb	ENSMUSG00000052837	Junb	0.0101899	0.999977	1.07462	1.07462	400.36	372.56
Klf3	ENSMUSG00000029178	Klf3	0.0489355	0.999977	1.05826	1.05826	350.155	330.877
Kmo	ENSMUSG00000039783	Kmo	0.00801169	0.882329	0.913798	-1.09433	188.049	205.789
Kmt2a	ENSMUSG00000002028	Kmt2a	0.00490796	0.621408	0.925579	-1.0804	301.71	325.969
Kmt2e	ENSMUSG00000029004	Kmt2e	0.0463128	0.999977	1.04072	1.04072	646.719	621.415
Lamb3	ENSMUSG00000026639	Lamb3	0.0365018	0.999977	0.915133	-1.09274	129.071	141.041
Laptm5	ENSMUSG00000028581	Laptm5	7.59655e-10	6.42668e-07	0.888599	-1.12537	630.55	709.6
Lax1	ENSMUSG00000051998	Lax1	0.0419573	0.999977	0.920737	-1.08609	134.341	145.905
Lcp1	ENSMUSG00000021998	Lcp1	0.00277159	0.412678	0.94615	-1.05692	774.887	818.99
Limd1	ENSMUSG00000025239	Limd1	0.0110649	0.999977	1.08593	1.08593	210.092	193.468
Limd2	ENSMUSG00000040699	Limd2	0.00201955	0.334175	0.941211	-1.06246	609.74	647.825
Lrch1	ENSMUSG00000068015	Lrch1	0.0260209	0.999977	0.944937	-1.05827	358.815	379.724
Lrmp	ENSMUSG00000030263	Lrmp	0.0175842	0.999977	0.917758	-1.08961	171.705	187.092
Lrrk2	ENSMUSG00000036273	Lrrk2	0.00197006	0.333334	1.0718	1.0718	688.807	642.666
Ltb	ENSMUSG00000024399	Ltb	0.000991611	0.196339	0.939242	-1.06469	716.532	762.882
Ly6e	ENSMUSG00000022587	Ly6e	6.64843e-05	0.0202854	0.954283	-1.04791	2155.6	2258.87
Ly86	ENSMUSG00000021423	Ly86	0.0182033	0.999977	1.05429	1.05429	532.091	504.691
Lyst	ENSMUSG00000019726	Lyst	0.000526099	0.116569	1.11548	1.11548	284.825	255.339
Macf1	ENSMUSG00000028649	Macf1	5.6359e-05	0.0177789	0.940508	-1.06325	1156.02	1229.15
Malat1	ENSMUSG00000092341	Malat1	0.000879082	0.177842	1.02086	1.02086	30686.5	30059.4
Man1a	ENSMUSG00000003746	Man1a	0.00735624	0.834843	1.04726	1.04726	1536.63	1467.29
Man2a1	ENSMUSG00000024085	Man2a1	0.00833324	0.896522	0.917271	-1.09019	204.519	222.965
Map3k1	ENSMUSG00000021754	Map3k1	0.0290599	0.999977	1.06346	1.06346	299.538	281.663
Mbnl1	ENSMUSG00000027763	Mbnl1	0.00822967	0.890527	0.958304	-1.04351	1008.79	1052.68
Mcl1	ENSMUSG00000038612	Mcl1	0.00403008	0.547078	0.948435	-1.05437	697.869	735.811
Mef2c	ENSMUSG00000005583	Mef2c	0.000575921	0.12464	0.950568	-1.052	1920.89	2020.78
Mir142hg	ENSMUSG00000084796	Mir142hg	1.49499e-06	0.000678652	0.912297	-1.09613	661.448	725.036
Mirt1	ENSMUSG00000097636	Mirt1	0.0403384	0.999977	1.0956	1.0956	141.128	128.814
Mkln1	ENSMUSG00000025609	Mkln1	0.0137104	0.999977	1.08984	1.08984	181.868	166.876
Mllt10	ENSMUSG00000026743	Mllt10	0.0415323	0.999977	0.940649	-1.0631	256.784	272.986
Ms4a1	ENSMUSG00000024673	Ms4a1	0.000163053	0.0446285	0.934124	-1.07052	804.792	861.547
Msn	ENSMUSG00000031207	Msn	0.0228769	0.999977	0.957451	-1.04444	621.12	648.723
mt-Atp6	ENSMUSG00000064357	mt-Atp6	5.55257e-15	8.61203e-12	1.10637	1.10637	2014.06	1820.42
mt-Atp8	ENSMUSG00000064356	mt-Atp8	0.000441951	0.100312	1.10793	1.10793	265.164	239.332
mt-Co1	ENSMUSG00000064351	mt-Co1	2.43058e-06	0.00105205	1.05322	1.05322	3537.44	3358.69
mt-Co2	ENSMUSG00000064354	mt-Co2	9.23838e-18	1.9105e-14	1.11222	1.11222	2240.55	2014.49
mt-Co3	ENSMUSG00000064358	mt-Co3	1.75814e-14	2.51711e-11	1.09662	1.09662	2789.99	2544.17
mt-Cytb	ENSMUSG00000064370	mt-Cytb	4.50158e-25	1.67567e-21	1.1391	1.1391	2743.31	2408.32
mt-Nd1	ENSMUSG00000064341	mt-Nd1	2.7418e-13	3.64502e-10	1.13979	1.13979	866.818	760.504
mt-Nd2	ENSMUSG00000064345	mt-Nd2	2.08884e-11	2.42984e-08	1.13734	1.13734	734.916	646.171
mt-Nd4	ENSMUSG00000064363	mt-Nd4	0.0160822	0.999977	1.05194	1.05194	587.188	558.197
mt-Nd4l	ENSMUSG00000065947	mt-Nd4l	4.14431e-11	4.28522e-08	1.10905	1.10905	1169.65	1054.64
Mylip	ENSMUSG00000038175	Mylip	0.027762	0.999977	0.938308	-1.06575	274.326	292.362
Napsa	ENSMUSG00000002204	Napsa	0.00307933	0.447753	0.935216	-1.06927	455.874	487.454
Neat1	ENSMUSG00000092274	Neat1	0.0333829	0.999977	0.926833	-1.07894	170.828	184.313
Nfkbia	ENSMUSG00000021025	Nfkbia	0.0408659	0.999977	1.05359	1.05359	379.75	360.436
Nrros	ENSMUSG00000052384	Nrros	0.0048021	0.612169	1.07839	1.07839	339.596	314.91
Nsd1	ENSMUSG00000021488	Nsd1	0.0479041	0.999977	0.953813	-1.04842	392.67	411.685
Nxpe3	ENSMUSG00000075033	Nxpe3	0.0230549	0.999977	0.926995	-1.07875	193.138	208.348
P2ry10	ENSMUSG00000050921	P2ry10	7.98979e-08	4.3737e-05	1.19734	1.19734	235.613	196.78
Pan3	ENSMUSG00000029647	Pan3	0.0309291	0.999977	0.942205	-1.06134	306.913	325.739
Pax5	ENSMUSG00000014030	Pax5	0.00215509	0.348788	0.943366	-1.06003	726.378	769.985
Pcmtd1	ENSMUSG00000051285	Pcmtd1	0.00212646	0.347172	1.10054	1.10054	271.106	246.339
Pdcd4	ENSMUSG00000024975	Pdcd4	0.00316017	0.455946	1.08986	1.08986	289.996	266.087
Pde3b	ENSMUSG00000030671	Pde3b	1.60961e-08	9.3619e-06	0.804742	-1.24263	244.504	303.829
Pgap1	ENSMUSG00000073678	Pgap1	8.15363e-19	2.16793e-15	1.22838	1.22838	801.426	652.426
Phtf2	ENSMUSG00000039987	Phtf2	0.012549	0.999977	1.0834	1.0834	254.628	235.026
Plaur	ENSMUSG00000046223	Plaur	6.72801e-07	0.000329531	1.24502	1.24502	158.821	127.564
Pold4	ENSMUSG00000024854	Pold4	0.00134142	0.249665	0.900715	-1.11023	186.22	206.747
Pou2af1	ENSMUSG00000032053	Pou2af1	0.000207304	0.0543429	1.10083	1.10083	447.06	406.112
Pou2f2	ENSMUSG00000008496	Pou2f2	0.0115043	0.999977	0.937647	-1.0665	386.079	411.753
Ppp1r16b	ENSMUSG00000037754	Ppp1r16b	0.0119438	0.999977	0.916792	-1.09076	185.425	202.255
Ppp3cc	ENSMUSG00000022092	Ppp3cc	0.0168963	0.999977	0.932808	-1.07203	270.018	289.468
Prkd2	ENSMUSG00000041187	Prkd2	0.000725186	0.149968	0.89855	-1.1129	212.769	236.792
Psmb8	ENSMUSG00000024338	Psmb8	0.00344171	0.488986	0.922369	-1.08416	300.253	325.524
Psmb9	ENSMUSG00000096727	Psmb9	0.0135793	0.999977	0.916685	-1.09089	155.311	169.426
Psme1	ENSMUSG00000022216	Psme1	0.0460594	0.999977	1.06279	1.06279	255.241	240.161
Ptpn6	ENSMUSG00000004266	Ptpn6	0.0122719	0.999977	0.935139	-1.06936	340.161	363.754
Ptprc	ENSMUSG00000026395	Ptprc	5.99142e-06	0.00232317	0.937984	-1.06612	1422.64	1516.7
Pxk	ENSMUSG00000033885	Pxk	0.0255479	0.999977	0.954385	-1.0478	554.703	581.216
Rab3gap1	ENSMUSG00000036104	Rab3gap1	0.0281599	0.999977	1.07201	1.07201	217.904	203.268
Rabgap1l	ENSMUSG00000026721	Rabgap1l	8.90694e-07	0.000425066	1.10352	1.10352	782.19	708.811
Rac2	ENSMUSG00000033220	Rac2	0.0184927	0.999977	0.953563	-1.0487	565.265	592.793
Rap1b	ENSMUSG00000052681	Rap1b	0.00297079	0.435372	1.07437	1.07437	401.956	374.132
Rap1gds1	ENSMUSG00000028149	Rap1gds1	8.0894e-05	0.0238984	1.10555	1.10555	488.95	442.27
Rapgef1	ENSMUSG00000039844	Rapgef1	0.000903817	0.18088	1.123	1.123	181.882	161.961
Rapgef4	ENSMUSG00000049044	Rapgef4	0.00543947	0.666049	0.900497	-1.1105	195.757	217.388
Rasgrp2	ENSMUSG00000032946	Rasgrp2	0.00140034	0.258051	0.908016	-1.1013	236.763	260.747
Rcsd1	ENSMUSG00000040723	Rcsd1	0.0115138	0.999977	0.943349	-1.06005	441.856	468.391
Retreg1	ENSMUSG00000022270	Retreg1	0.00162987	0.288595	0.909773	-1.09917	267.237	293.741
Rhoh	ENSMUSG00000029204	Rhoh	3.34304e-07	0.000172835	0.865066	-1.15598	282.239	326.262
Rin3	ENSMUSG00000044456	Rin3	0.0231244	0.999977	0.913592	-1.09458	133.674	146.317
Rnase6	ENSMUSG00000021880	Rnase6	0.0136625	0.999977	0.919788	-1.08721	173.953	189.123
Rnf144a	ENSMUSG00000020642	Rnf144a	0.0268203	0.999977	0.929868	-1.07542	191.023	205.43
Rpl14	ENSMUSG00000025794	Rpl14	0.00657765	0.77483	1.05591	1.05591	654.036	619.403
Rpl23	ENSMUSG00000071415	Rpl23	0.0406762	0.999977	1.02741	1.02741	1588.34	1545.97
Rpl7a	ENSMUSG00000062647	Rpl7a	0.0241467	0.999977	1.04755	1.04755	568.773	542.954
Rps2	ENSMUSG00000044533	Rps2	0.00010889	0.0311545	1.05565	1.05565	1507.67	1428.19
Rps27a	ENSMUSG00000020460	Rps27a	0.00280798	0.414778	1.04379	1.04379	1447.18	1386.46
Rps6ka3	ENSMUSG00000031309	Rps6ka3	0.0118984	0.999977	1.0892	1.0892	254.64	233.787
Rsrc1	ENSMUSG00000034544	Rsrc1	0.042164	0.999977	1.08011	1.08011	199.174	184.401
Rsrp1	ENSMUSG00000037266	Rsrp1	1.33861e-09	1.03809e-06	0.890183	-1.12336	593.11	666.278
Samd9l	ENSMUSG00000047735	Samd9l	0.00423174	0.566628	0.910889	-1.09783	200.203	219.789
Samhd1	ENSMUSG00000027639	Samhd1	0.00389302	0.536718	0.938818	-1.06517	509.372	542.567
Sarnp	ENSMUSG00000078427	Sarnp	0.0355607	0.999977	1.07514	1.07514	178.281	165.822
Sat1	ENSMUSG00000025283	Sat1	0.00155913	0.280076	0.897178	-1.11461	164.56	183.42
Scd1	ENSMUSG00000037071	Scd1	0.0320791	0.999977	0.933262	-1.07151	196.31	210.348
Sell	ENSMUSG00000026581	Sell	0.0492677	0.999977	0.963597	-1.03778	729.173	756.72
Senp7	ENSMUSG00000052917	Senp7	0.0171411	0.999977	0.933557	-1.07117	275.602	295.217
Setd5	ENSMUSG00000034269	Setd5	0.0198149	0.999977	1.07493	1.07493	258.362	240.353
Setx	ENSMUSG00000043535	Setx	0.0111997	0.999977	0.918677	-1.08852	180.556	196.539
Sf3b1	ENSMUSG00000025982	Sf3b1	0.00807012	0.883535	0.939156	-1.06479	382.034	406.785
Sgms1	ENSMUSG00000040451	Sgms1	0.0227201	0.999977	1.05692	1.05692	527.463	499.056
Shisa5	ENSMUSG00000025647	Shisa5	0.00270501	0.406013	0.953566	-1.04869	959.855	1006.6
Siglecg	ENSMUSG00000030468	Siglecg	0.00230944	0.359883	0.928872	-1.07657	377.887	406.824
Slamf6	ENSMUSG00000015314	Slamf6	0.0321842	0.999977	0.932742	-1.07211	213.286	228.666
Slc12a6	ENSMUSG00000027130	Slc12a6	0.00202889	0.334175	0.936114	-1.06825	576.437	615.777
Slc1a5	ENSMUSG00000001918	Slc1a5	0.0287866	0.999977	0.935211	-1.06928	225.159	240.757
Slc50a1	ENSMUSG00000027953	Slc50a1	0.00043245	0.0993674	0.896294	-1.11571	200.722	223.947
Sltm	ENSMUSG00000032212	Sltm	0.0377561	0.999977	1.06868	1.06868	229.867	215.093
Smarca2	ENSMUSG00000024921	Smarca2	0.0288033	0.999977	0.926634	-1.07917	172.108	185.735
Smim14	ENSMUSG00000037822	Smim14	0.043296	0.999977	0.954918	-1.04721	436.34	456.939
Snx29	ENSMUSG00000071669	Snx29	0.000405185	0.0960666	0.915877	-1.09185	424.955	463.987
Snx5	ENSMUSG00000027423	Snx5	0.0444003	0.999977	0.949321	-1.05338	347.536	366.089
Son	ENSMUSG00000022961	Son	0.0117943	0.999977	0.951499	-1.05097	559.188	587.692
Sp140	ENSMUSG00000070031	Sp140	0.00732801	0.834843	0.916358	-1.09128	202.961	221.487
Srrm1	ENSMUSG00000028809	Srrm1	0.0377618	0.999977	1.06232	1.06232	273.701	257.645
Srsf1	ENSMUSG00000018379	Srsf1	0.0388327	0.999977	0.931587	-1.07344	150.477	161.528
Srsf5	ENSMUSG00000021134	Srsf5	0.0213078	0.999977	1.06961	1.06961	269.553	252.009
Stk17b	ENSMUSG00000026094	Stk17b	4.78922e-09	3.18346e-06	1.12251	1.12251	750.034	668.177
Strn3	ENSMUSG00000020954	Strn3	0.0221094	0.999977	1.07649	1.07649	237.538	220.66
Stt3b	ENSMUSG00000032437	Stt3b	1.46723e-10	1.33668e-07	1.23238	1.23238	360.93	292.874
Sub1	ENSMUSG00000022205	Sub1	0.017979	0.999977	1.07395	1.07395	246.748	229.758
Sypl	ENSMUSG00000020570	Sypl	0.0038428	0.533747	0.914314	-1.09372	219.996	240.613
Taf15	ENSMUSG00000020680	Taf15	0.0190336	0.999977	1.07339	1.07339	243.816	227.146
Tagap	ENSMUSG00000033450	Tagap	1.72392e-09	1.28342e-06	1.27507	1.27507	175.75	137.835
Tagln2	ENSMUSG00000026547	Tagln2	2.73e-09	1.95426e-06	1.23021	1.23021	242.666	197.256
Tank	ENSMUSG00000064289	Tank	0.00517222	0.641769	1.08108	1.08108	354.784	328.177
Tgfb1	ENSMUSG00000002603	Tgfb1	0.00188619	0.322071	0.918543	-1.08868	299.847	326.438
Tle5	ENSMUSG00000054452	Tle5	0.0332055	0.999977	0.941708	-1.0619	264.956	281.357
Tln1	ENSMUSG00000028465	Tln1	0.0228608	0.999977	0.933743	-1.07096	235.737	252.465
Tmem243	ENSMUSG00000079659	Tmem243	0.0427679	0.999977	0.945352	-1.05781	297.232	314.414
Tmod3	ENSMUSG00000058587	Tmod3	0.0351691	0.999977	1.04916	1.04916	511.886	487.903
Tmsb10	ENSMUSG00000079523	Tmsb10	0.00799235	0.882329	0.968603	-1.03241	2172.3	2242.71
Tnfrsf13c	ENSMUSG00000068105	Tnfrsf13c	4.12728e-06	0.00170704	0.867117	-1.15325	230.473	265.792
Trim59	ENSMUSG00000034317	Trim59	0.000690577	0.144416	0.897519	-1.11418	215.927	240.582
Tsc22d3	ENSMUSG00000031431	Tsc22d3	6.59709e-37	1.22785e-32	1.34695	1.34695	537.664	399.173
Tut4	ENSMUSG00000034610	Tut4	0.00238554	0.366939	0.945061	-1.05813	694.136	734.488
Txnip	ENSMUSG00000038393	Txnip	0.0448477	0.999977	0.955563	-1.0465	500.958	524.254
Ubb	ENSMUSG00000019505	Ubb	0.0291058	0.999977	0.968041	-1.03301	1209.8	1249.74
Ube2d3	ENSMUSG00000078578	Ube2d3	0.0287768	0.999977	0.945676	-1.05744	335.788	355.078
Ucp2	ENSMUSG00000033685	Ucp2	8.8536e-10	7.16449e-07	1.15185	1.15185	485.425	421.432
Unc93b1	ENSMUSG00000036908	Unc93b1	5.67228e-09	3.64043e-06	0.892825	-1.12004	580.989	650.731
Usp34	ENSMUSG00000056342	Usp34	0.0210399	0.999977	0.933274	-1.0715	245.072	262.594
Vars	ENSMUSG00000007029	Vars	0.0491509	0.999977	1.06115	1.06115	241.357	227.448
Vim	ENSMUSG00000026728	Vim	7.82886e-08	4.3737e-05	1.17565	1.17565	411.692	350.182
Wasf2	ENSMUSG00000028868	Wasf2	0.0191304	0.999977	1.06075	1.06075	361.436	340.737
Xist	ENSMUSG00000086503	Xist	0.0340248	0.999977	1.10871	1.10871	306.337	276.301
Xpr1	ENSMUSG00000026469	Xpr1	0.00651295	0.774281	1.10299	1.10299	191.424	173.55
Ypel3	ENSMUSG00000042675	Ypel3	0.00218832	0.351111	0.929144	-1.07626	378.737	407.619
Ythdf3	ENSMUSG00000047213	Ythdf3	0.0340918	0.999977	0.926179	-1.0797	151.199	163.25
Zfp36l2	ENSMUSG00000045817	Zfp36l2	0.046474	0.999977	1.04927	1.04927	423.822	403.92
Zfp644	ENSMUSG00000049606	Zfp644	0.023961	0.999977	0.924871	-1.08123	167.118	180.693
Zmym2	ENSMUSG00000021945	Zmym2	0.0457502	0.999977	0.932908	-1.07192	169.476	181.665

## Sheet: Spleen_HF vs sham
Gene ID	Ensembl ID	Gene name	P-value	FDR step up	Ratio	Fold change	LSMean(HF)	LSMean(sham)		Genes differentially expressed in antigen processing and presentation
Hsp90ab1	ENSMUSG00000023944	Hsp90ab1	4.77331e-47	9.35282e-43	0.789458	-1.26669	1435.85	1818.78		Gene Symbol	Gene Description
Dnaja1	ENSMUSG00000028410	Dnaja1	1.11617e-29	1.09351e-25	0.740318	-1.35077	276.093	372.939		HSPA8	heat shock protein family A (Hsp70) member 8
Hsp90aa1	ENSMUSG00000021270	Hsp90aa1	6.07724e-29	3.96925e-25	0.712115	-1.40427	180.485	253.449		HSP90AA1	heat shock protein 90 alpha family class A member 1
Hspa8	ENSMUSG00000015656	Hspa8	8.19655e-29	4.01508e-25	0.811774	-1.23187	874.198	1076.9		HSP90AB1	heat shock protein 90 alpha family class B member 1
Hspe1	ENSMUSG00000073676	Hspe1	4.19144e-25	1.64254e-21	0.75287	-1.32825	258.206	342.963		HLA-DRB5	major histocompatibility complex, class II, DR beta 5
Stk17b	ENSMUSG00000026094	Stk17b	5.00945e-21	1.63592e-17	1.23305	1.23305	542.836	440.238		HLA-DMB	major histocompatibility complex, class II, DM beta
Cd55	ENSMUSG00000026399	Cd55	2.93312e-14	8.21022e-11	1.24751	1.24751	390.406	312.949		HLA-A	major histocompatibility complex, class I, A
Gm43305	ENSMUSG00000105703	Gm43305	8.86258e-14	2.17067e-10	0.818337	-1.22199	870.037	1063.18		TAP1	transporter 1, ATP binding cassette subfamily B member
Pde4b	ENSMUSG00000028525	Pde4b	6.4116e-13	1.39588e-09	1.23898	1.23898	281.836	227.474		IFI30	IFI30 lysosomal thiol reductase
Junb	ENSMUSG00000052837	Junb	2.4001e-12	4.70276e-09	1.31385	1.31385	160.536	122.188		PDIA3	protein disulfide isomerase family A member 3
Hsph1	ENSMUSG00000029657	Hsph1	7.74916e-11	1.38034e-07	0.7325	-1.36519	85.1864	116.295		B2M	beta-2-microglobulin
Laptm5	ENSMUSG00000028581	Laptm5	2.70334e-10	4.41411e-07	0.873272	-1.14512	388.984	445.433		CANX	calnexin
Iglc3	ENSMUSG00000105547	Iglc3	4.29556e-10	6.24608e-07	1.13236	1.13236	1064.91	940.427
Plaur	ENSMUSG00000046223	Plaur	4.46285e-10	6.24608e-07	1.24767	1.24767	216.51	173.531
Chordc1	ENSMUSG00000001774	Chordc1	2.37507e-09	3.10247e-06	0.805953	-1.24077	105.814	131.291
Hsp90b1	ENSMUSG00000020048	Hsp90b1	3.07348e-09	3.76386e-06	0.864238	-1.15709	480.962	556.515
Hspd1	ENSMUSG00000025980	Hspd1	8.62566e-09	9.80222e-06	0.823154	-1.21484	160.718	195.247
Ptges3	ENSMUSG00000071072	Ptges3	9.00479e-09	9.80222e-06	0.850363	-1.17597	183.351	215.614
Ralgps2	ENSMUSG00000026594	Ralgps2	1.19555e-08	1.23293e-05	1.12145	1.12145	1011.06	901.561
Add3	ENSMUSG00000025026	Add3	1.52614e-08	1.49516e-05	1.17604	1.17604	335.684	285.437
Sorl1	ENSMUSG00000049313	Sorl1	1.80314e-08	1.68242e-05	0.852828	-1.17257	341.562	400.506
Ccnd3	ENSMUSG00000034165	Ccnd3	6.12312e-08	5.45347e-05	0.865536	-1.15535	451.235	521.337
Pdcd4	ENSMUSG00000024975	Pdcd4	6.71314e-08	5.71901e-05	0.8763	-1.14116	343.724	392.245
Ahsa1	ENSMUSG00000021037	Ahsa1	7.09917e-08	5.7934e-05	0.823145	-1.21485	105.24	127.852
mt-Co1	ENSMUSG00000064351	mt-Co1	7.39181e-08	5.7934e-05	0.932041	-1.07291	4344.59	4661.37
Cacybp	ENSMUSG00000014226	Cacybp	1.53078e-07	0.000115362	0.833592	-1.19963	124.105	148.879
Jund	ENSMUSG00000071076	Jund	2.93082e-07	0.000212691	1.13073	1.13073	587.147	519.264
Lsp1	ENSMUSG00000018819	Lsp1	4.37306e-07	0.000306021	1.12672	1.12672	385.915	342.512
Gimap6	ENSMUSG00000047867	Gimap6	5.81397e-07	0.000392824	1.11187	1.11187	451.73	406.28
Stip1	ENSMUSG00000024966	Stip1	8.20095e-07	0.000535631	0.821252	-1.21765	99.4788	121.131
Ddit4	ENSMUSG00000020108	Ddit4	9.37206e-07	0.000592375	0.837063	-1.19465	131.82	157.479
Gm42031	ENSMUSG00000110386	Gm42031	1.56998e-06	0.000961321	0.860298	-1.16239	166.442	193.471
Ywhah	ENSMUSG00000018965	Ywhah	1.62033e-06	0.000962081	0.861256	-1.1611	150.079	174.256
H3f3b	ENSMUSG00000016559	H3f3b	1.89552e-06	0.00109237	0.925894	-1.08004	939.358	1014.54
Foxp1	ENSMUSG00000030067	Foxp1	2.28278e-06	0.00127797	1.10198	1.10198	1723.43	1563.93
Cd72	ENSMUSG00000028459	Cd72	2.96152e-06	0.00161189	0.874021	-1.14414	235.226	269.131
Fry	ENSMUSG00000056602	Fry	4.1242e-06	0.00218404	1.22402	1.22402	154.383	126.128
Napsa	ENSMUSG00000002204	Napsa	4.54169e-06	0.00234184	0.919533	-1.08751	570.844	620.798
Prkcb	ENSMUSG00000052889	Prkcb	7.00155e-06	0.00347901	1.10226	1.10226	757.585	687.3
CAAA01147332.1	ENSMUSG00000095742	.	7.10219e-06	0.00347901	1.15868	1.15868	165.876	143.159
Pgap1	ENSMUSG00000073678	Pgap1	7.46925e-06	0.00356957	1.19996	1.19996	153.716	128.101
Ankrd44	ENSMUSG00000052331	Ankrd44	8.57336e-06	0.00399968	1.1306	1.1306	433.672	383.577
Coro1a	ENSMUSG00000030707	Coro1a	1.19393e-05	0.00544044	1.07108	1.07108	1126.11	1051.37
Rasgef1b	ENSMUSG00000089809	Rasgef1b	1.2413e-05	0.00552774	1.18234	1.18234	175.286	148.253
Fli1	ENSMUSG00000016087	Fli1	1.74693e-05	0.00760653	1.12638	1.12638	390.031	346.269
Dennd4a	ENSMUSG00000053641	Dennd4a	2.52714e-05	0.0107645	1.14966	1.14966	328.187	285.465
Apoe	ENSMUSG00000002985	Apoe	2.92409e-05	0.0121904	0.815292	-1.22655	142.5	174.784
Hvcn1	ENSMUSG00000064267	Hvcn1	3.00418e-05	0.0122633	0.892869	-1.11999	277.436	310.725
H2-K1	ENSMUSG00000061232	H2-K1	3.23383e-05	0.0129313	0.945356	-1.0578	1383.19	1463.14
Nedd9	ENSMUSG00000021365	Nedd9	3.48206e-05	0.0136455	1.11821	1.11821	688.391	615.622
Ighd	ENSMUSG00000104213	Ighd	3.60874e-05	0.0137397	1.09013	1.09013	635.621	583.068
Pou2af1	ENSMUSG00000032053	Pou2af1	3.64634e-05	0.0137397	0.884282	-1.13086	250.032	282.752
Erp29	ENSMUSG00000029616	Erp29	3.95788e-05	0.0146322	0.89875	-1.11266	227.221	252.819
Acp5	ENSMUSG00000001348	Acp5	4.2218e-05	0.0153189	0.888585	-1.12538	200.335	225.454
Ptpn22	ENSMUSG00000027843	Ptpn22	4.51078e-05	0.0160699	0.845364	-1.18292	123.673	146.295
Ifi30	ENSMUSG00000031838	Ifi30	4.62424e-05	0.0161667	0.891473	-1.12174	394.487	442.511
Aff3	ENSMUSG00000037138	Aff3	4.70299e-05	0.0161667	1.10906	1.10906	876.931	790.699
Rel	ENSMUSG00000020275	Rel	4.98798e-05	0.0168508	1.11675	1.11675	337.548	302.259
Irf8	ENSMUSG00000041515	Irf8	5.2951e-05	0.017366	0.896393	-1.11558	237.18	264.594
Tmem163	ENSMUSG00000026347	Tmem163	5.37261e-05	0.017366	1.16222	1.16222	286.903	246.858
mt-Co3	ENSMUSG00000064358	mt-Co3	5.40637e-05	0.017366	0.947893	-1.05497	3285.83	3466.45
Ppp1r21	ENSMUSG00000034709	Ppp1r21	6.15866e-05	0.0194633	0.868579	-1.15131	119.419	137.488
Ptprc	ENSMUSG00000026395	Ptprc	6.36843e-05	0.0198068	1.08471	1.08471	1114.05	1027.06
Tmem131	ENSMUSG00000026116	Tmem131	7.96103e-05	0.0243732	0.864508	-1.15673	141.015	163.116
Cytip	ENSMUSG00000026832	Cytip	8.37465e-05	0.025245	1.11472	1.11472	257.427	230.934
Cmss1	ENSMUSG00000022748	Cmss1	9.15306e-05	0.0271735	0.933796	-1.0709	6323.64	6771.97
Adgre5	ENSMUSG00000002885	Adgre5	0.000108945	0.0318607	1.12706	1.12706	222.72	197.611
Cep85	ENSMUSG00000037443	Cep85	0.000114016	0.0328534	0.872849	-1.14567	186.736	213.938
2610035D17Rik	ENSMUSG00000087259	2610035D17Rik	0.000155707	0.0439528	0.850915	-1.17521	140.214	164.781
Ier2	ENSMUSG00000053560	Ier2	0.000157022	0.0439528	1.15189	1.15189	135.464	117.602
Zfp36l1	ENSMUSG00000021127	Zfp36l1	0.000171461	0.0473184	1.07998	1.07998	645.37	597.576
4930523C07Rik	ENSMUSG00000090394	4930523C07Rik	0.000176437	0.0477807	1.10137	1.10137	296.806	269.488
St13	ENSMUSG00000022403	St13	0.000178013	0.0477807	0.88369	-1.13162	133.751	151.355
Ripor2	ENSMUSG00000036006	Ripor2	0.000202673	0.0536645	1.09024	1.09024	954.638	875.62
Fus	ENSMUSG00000030795	Fus	0.000208435	0.0544545	1.09955	1.09955	291.285	264.913
Sp140	ENSMUSG00000070031	Sp140	0.000219028	0.0564688	0.905548	-1.1043	259.937	287.05
Stap1	ENSMUSG00000029254	Stap1	0.000227842	0.0579785	1.11097	1.11097	266.885	240.228
Snx9	ENSMUSG00000002365	Snx9	0.000294674	0.0732308	1.10756	1.10756	234.662	211.873
Bcl11a	ENSMUSG00000000861	Bcl11a	0.000295255	0.0732308	1.10923	1.10923	472.304	425.792
Mir142hg	ENSMUSG00000084796	Mir142hg	0.000348389	0.085263	0.93753	-1.06663	606.639	647.061
Card11	ENSMUSG00000036526	Card11	0.00035247	0.085263	1.11535	1.11535	257.104	230.514
H2-Q6	ENSMUSG00000073409	H2-Q6	0.000375703	0.0897747	0.90481	-1.1052	202.171	223.441
Ebf1	ENSMUSG00000057098	Ebf1	0.000396783	0.0936696	1.06712	1.06712	2533.87	2374.51
Arl6ip1	ENSMUSG00000030654	Arl6ip1	0.000407112	0.0949637	0.928546	-1.07695	377.559	406.613
Zfp36	ENSMUSG00000044786	Zfp36	0.000418852	0.0965528	1.1137	1.1137	213.21	191.443
Sypl	ENSMUSG00000020570	Sypl	0.000435351	0.0991892	0.893754	-1.11888	151.121	169.086
Chchd2	ENSMUSG00000070493	Chchd2	0.000451639	0.101717	0.90935	-1.09969	212.837	234.054
Ier5	ENSMUSG00000056708	Ier5	0.000474559	0.105665	1.10053	1.10053	238.972	217.142
Evl	ENSMUSG00000021262	Evl	0.000485408	0.106866	1.11483	1.11483	168.696	151.321
Igkv3-4	ENSMUSG00000096715	Igkv3-4	0.00049949	0.108745	1.36288	1.36288	223.421	163.933
Pax5	ENSMUSG00000014030	Pax5	0.000524543	0.112944	1.07924	1.07924	687.427	636.953
Ccr7	ENSMUSG00000037944	Ccr7	0.000558842	0.119021	1.15327	1.15327	155.159	134.538
Rab10	ENSMUSG00000020671	Rab10	0.000574999	0.121059	0.897561	-1.11413	160.054	178.321
Bach2	ENSMUSG00000040270	Bach2	0.000580765	0.121059	1.10181	1.10181	926.381	840.784
Stat1	ENSMUSG00000026104	Stat1	0.000597709	0.123279	0.89184	-1.12128	203.689	228.392
Fchsd2	ENSMUSG00000030691	Fchsd2	0.000634578	0.12952	1.10196	1.10196	586.138	531.907
Klf3	ENSMUSG00000029178	Klf3	0.00066576	0.134484	1.13303	1.13303	146.506	129.304
Elmsan1	ENSMUSG00000042507	.	0.000700044	0.139966	1.11729	1.11729	160.205	143.386
Ypel3	ENSMUSG00000042675	Ypel3	0.000716943	0.141075	1.10623	1.10623	213.443	192.945
AU020206	ENSMUSG00000097415	AU020206	0.000719991	0.141075	0.889273	-1.12451	164.604	185.099
2410006H16Rik	ENSMUSG00000086841	2410006H16Rik	0.000768424	0.149074	0.919314	-1.08777	377.969	411.142
Igkv2-112	ENSMUSG00000076518	Igkv2-112	0.000783101	0.150432	1.21814	1.21814	109.179	89.6279
Cd37	ENSMUSG00000030798	Cd37	0.000861528	0.163891	1.04271	1.04271	1347.95	1292.73
Igkc	ENSMUSG00000076609	Igkc	0.000921029	0.173525	1.06561	1.06561	1450.6	1361.29
Rap1b	ENSMUSG00000052681	Rap1b	0.00095053	0.177378	1.08512	1.08512	278.408	256.569
Emp3	ENSMUSG00000040212	Emp3	0.000990777	0.183144	1.14017	1.14017	165.864	145.472
Jchain	ENSMUSG00000067149	Jchain	0.00105844	0.193822	0.897184	-1.1146	320.226	356.923
B2m	ENSMUSG00000060802	B2m	0.00112932	0.204888	0.948655	-1.05412	993.143	1046.9
Igkv3-2	ENSMUSG00000095351	Igkv3-2	0.00116086	0.208678	1.24624	1.24624	217.674	174.665
Pxk	ENSMUSG00000033885	Pxk	0.00117994	0.210179	1.09357	1.09357	276.097	252.473
S100a10	ENSMUSG00000041959	S100a10	0.00122873	0.216899	1.11046	1.11046	257.673	232.043
Arap2	ENSMUSG00000037999	Arap2	0.00131026	0.229225	0.900888	-1.11002	212.075	235.406
Nr3c1	ENSMUSG00000024431	Nr3c1	0.00144995	0.251418	0.905579	-1.10427	229.646	253.59
Tank	ENSMUSG00000064289	Tank	0.00146666	0.252085	0.891056	-1.12226	193.898	217.604
Itga4	ENSMUSG00000027009	Itga4	0.00152789	0.260326	1.09761	1.09761	298.495	271.951
Smchd1	ENSMUSG00000024054	Smchd1	0.00154187	0.260443	1.08969	1.08969	292.531	268.453
Ly6a	ENSMUSG00000075602	Ly6a	0.00186441	0.312232	0.917996	-1.08933	542.87	591.364
Gns	ENSMUSG00000034707	Gns	0.00189884	0.315305	0.897626	-1.11405	149.387	166.425
Wasf2	ENSMUSG00000028868	Wasf2	0.00195551	0.321269	1.08068	1.08068	269.372	249.262
Pkig	ENSMUSG00000035268	Pkig	0.00196756	0.321269	0.935081	-1.06943	401.917	429.82
Ifi27l2a	ENSMUSG00000079017	Ifi27l2a	0.00206653	0.333111	0.89805	-1.11352	348.481	388.042
Ddx21	ENSMUSG00000020075	Ddx21	0.00207408	0.333111	0.907326	-1.10214	158.876	175.104
Srsf5	ENSMUSG00000021134	Srsf5	0.00210276	0.334971	1.09357	1.09357	182.576	166.955
Tmcc3	ENSMUSG00000020023	Tmcc3	0.00224202	0.354275	1.15875	1.15875	139.759	120.612
Hivep2	ENSMUSG00000015501	Hivep2	0.00229599	0.3599	1.10672	1.10672	301.908	272.795
Fam76b	ENSMUSG00000037808	Fam76b	0.00242183	0.376613	0.892929	-1.11991	103.872	116.327
Nsf	ENSMUSG00000034187	Nsf	0.00249931	0.385602	0.903277	-1.10708	161.869	179.202
mt-Co2	ENSMUSG00000064354	mt-Co2	0.00256295	0.392332	0.961192	-1.04037	2669.22	2776.99
Rbm3	ENSMUSG00000031167	Rbm3	0.00265638	0.403481	1.07357	1.07357	356.2	331.79
Pitpnc1	ENSMUSG00000040430	Pitpnc1	0.00280159	0.422265	0.87111	-1.14796	108.18	124.186
Fcer2a	ENSMUSG00000005540	Fcer2a	0.00283144	0.423505	1.10036	1.10036	280.777	255.167
Cobll1	ENSMUSG00000034903	Cobll1	0.00298616	0.441019	1.12504	1.12504	136.32	121.168
Bin1	ENSMUSG00000024381	Bin1	0.00299355	0.441019	1.08538	1.08538	204.444	188.362
Pde3b	ENSMUSG00000030671	Pde3b	0.00314462	0.459819	0.879818	-1.1366	137.925	156.765
Rasgrp2	ENSMUSG00000032946	Rasgrp2	0.00320304	0.464194	1.09605	1.09605	189.755	173.126
Mtss1	ENSMUSG00000022353	Mtss1	0.00324065	0.464194	0.907561	-1.10185	201.464	221.984
Ccm2	ENSMUSG00000000378	Ccm2	0.00324561	0.464194	1.09069	1.09069	192.529	176.521
Cd79b	ENSMUSG00000040592	Cd79b	0.00329833	0.466708	1.04453	1.04453	1697.8	1625.42
Stk10	ENSMUSG00000020272	Stk10	0.00331083	0.466708	1.09138	1.09138	199.485	182.783
Slc9a7	ENSMUSG00000037341	Slc9a7	0.00353095	0.491065	1.10223	1.10223	254.218	230.64
H2-Eb1	ENSMUSG00000060586	H2-Eb1	0.00353374	0.491065	1.0368	1.0368	3248.75	3133.43
Bank1	ENSMUSG00000037922	Bank1	0.00358449	0.494609	1.06001	1.06001	2135.39	2014.51
Psmb2	ENSMUSG00000028837	Psmb2	0.00364557	0.499519	0.915884	-1.09184	137.498	150.126
Tagln2	ENSMUSG00000026547	Tagln2	0.00388206	0.52823	1.13521	1.13521	151.999	133.895
Rapgef6	ENSMUSG00000037533	Rapgef6	0.00453466	0.612773	1.08165	1.08165	298.878	276.317
Ptbp3	ENSMUSG00000028382	Ptbp3	0.00463608	0.622187	1.06992	1.06992	369.845	345.676
Pxdc1	ENSMUSG00000021411	Pxdc1	0.00476719	0.635431	1.11171	1.11171	137.286	123.491
Ost4	ENSMUSG00000038803	Ost4	0.0048819	0.646324	1.0745	1.0745	260.139	242.103
Snx2	ENSMUSG00000034484	Snx2	0.00509911	0.67055	1.06358	1.06358	447.262	420.523
mt-Nd4l	ENSMUSG00000065947	mt-Nd4l	0.0052382	0.684248	0.956196	-1.04581	1112.19	1163.14
H2afz	ENSMUSG00000037894	.	0.00556259	0.721811	0.922123	-1.08445	235.117	254.974
Sema4d	ENSMUSG00000021451	Sema4d	0.00573903	0.739071	0.913889	-1.09422	152.706	167.094
Tax1bp1	ENSMUSG00000004535	Tax1bp1	0.00577105	0.739071	1.07255	1.07255	259.522	241.966
Crlf3	ENSMUSG00000017561	Crlf3	0.00582836	0.739853	1.07603	1.07603	283.895	263.837
Nfatc3	ENSMUSG00000031902	Nfatc3	0.00587432	0.739853	1.07884	1.07884	262.349	243.177
Dusp2	ENSMUSG00000027368	Dusp2	0.00589043	0.739853	1.10112	1.10112	185.472	168.44
Lpxn	ENSMUSG00000024696	Lpxn	0.00615335	0.767954	0.908634	-1.10055	114.384	125.886
Akap13	ENSMUSG00000066406	Akap13	0.0062772	0.778452	1.06456	1.06456	457.447	429.706
Cdc42	ENSMUSG00000006699	Cdc42	0.00663904	0.818147	1.05118	1.05118	497.061	472.86
1810026B05Rik	ENSMUSG00000101970	.	0.00697431	0.854091	1.07579	1.07579	233.015	216.599
Ifi203	ENSMUSG00000039997	Ifi203	0.00708074	0.861739	0.929697	-1.07562	280.626	301.847
mt-Cytb	ENSMUSG00000064370	mt-Cytb	0.00724824	0.876679	0.962466	-1.039	2842.2	2953.04
Ets1	ENSMUSG00000032035	Ets1	0.00739351	0.888764	1.0587	1.0587	582.079	549.806
Pcmtd1	ENSMUSG00000051285	Pcmtd1	0.00803105	0.959515	0.914051	-1.09403	154.271	168.778
Atp2b1	ENSMUSG00000019943	Atp2b1	0.00813068	0.96553	1.09598	1.09598	167.541	152.869
Zfp36l2	ENSMUSG00000045817	Zfp36l2	0.00818148	0.965711	0.913825	-1.0943	152.571	166.958
Arhgap45	ENSMUSG00000035697	Arhgap45	0.00887992	0.991241	1.05756	1.05756	437.942	414.108
Setbp1	ENSMUSG00000024548	Setbp1	0.00903591	0.991241	1.10426	1.10426	269.553	244.102
Capns1	ENSMUSG00000001794	Capns1	0.00906005	0.991241	1.09201	1.09201	129.451	118.544
Pou2f2	ENSMUSG00000008496	Pou2f2	0.00909383	0.991241	1.06379	1.06379	345.173	324.474
Ubxn4	ENSMUSG00000026353	Ubxn4	0.00981642	0.991241	0.913477	-1.09472	121.322	132.814
Dock11	ENSMUSG00000031093	Dock11	0.0101331	0.991241	1.08271	1.08271	240.828	222.431
Srp9	ENSMUSG00000026511	Srp9	0.0101533	0.991241	0.928065	-1.07751	161.431	173.944
Srebf2	ENSMUSG00000022463	Srebf2	0.010211	0.991241	1.09351	1.09351	125.223	114.515
Mrfap1	ENSMUSG00000055302	Mrfap1	0.010442	0.991241	0.916207	-1.09146	114.855	125.359
Iqgap1	ENSMUSG00000030536	Iqgap1	0.0106686	0.991241	1.05819	1.05819	371.661	351.224
Tpm3	ENSMUSG00000027940	Tpm3	0.0109016	0.991241	1.05717	1.05717	353.683	334.555
Laptm4a	ENSMUSG00000020585	Laptm4a	0.01091	0.991241	0.92984	-1.07545	165.193	177.658
Cd2	ENSMUSG00000027863	Cd2	0.0109331	0.991241	1.08593	1.08593	168.342	155.022
Fah	ENSMUSG00000030630	Fah	0.0110624	0.991241	1.05359	1.05359	442.061	419.578
Uqcrq	ENSMUSG00000044894	Uqcrq	0.0110832	0.991241	0.924839	-1.08127	165.871	179.351
Slc38a2	ENSMUSG00000022462	Slc38a2	0.011113	0.991241	1.08819	1.08819	145.516	133.723
Grap2	ENSMUSG00000042351	Grap2	0.0113028	0.991241	1.10021	1.10021	164.474	149.494
Actg1	ENSMUSG00000062825	Actg1	0.0114039	0.991241	1.04339	1.04339	1331.7	1276.32
Phf5a	ENSMUSG00000061360	Phf5a	0.0114931	0.991241	0.905402	-1.10448	96.7668	106.877
Hmgn1	ENSMUSG00000040681	Hmgn1	0.0115078	0.991241	0.94057	-1.06319	315.16	335.073
Psmb9	ENSMUSG00000096727	Psmb9	0.0115856	0.991241	0.934538	-1.07005	216.858	232.048
Btg2	ENSMUSG00000020423	Btg2	0.0115948	0.991241	1.07919	1.07919	193.395	179.203
Igkv14-111	ENSMUSG00000095771	Igkv14-111	0.0117029	0.991241	1.17843	1.17843	237.049	201.156
Ncl	ENSMUSG00000026234	Ncl	0.0123493	0.991241	0.938575	-1.06544	336.923	358.973
Zfp706	ENSMUSG00000062397	Zfp706	0.012677	0.991241	0.942726	-1.06075	276.183	292.962
Cdk2ap2	ENSMUSG00000024856	Cdk2ap2	0.0127449	0.991241	0.923471	-1.08287	154.322	167.111
Ubb	ENSMUSG00000019505	Ubb	0.0132231	0.991241	0.963678	-1.03769	1446.42	1500.94
Notch2	ENSMUSG00000027878	Notch2	0.0132849	0.991241	1.08813	1.08813	181.931	167.195
2010309G21Rik	ENSMUSG00000106567	2010309G21Rik	0.0134952	0.991241	1.10286	1.10286	159.987	145.066
Prkce	ENSMUSG00000045038	Prkce	0.0138086	0.991241	1.07892	1.07892	358.161	331.963
Spag9	ENSMUSG00000020859	Spag9	0.0141593	0.991241	1.08034	1.08034	219.42	203.103
Ubac2	ENSMUSG00000041765	Ubac2	0.0144207	0.991241	1.08174	1.08174	166.882	154.271
Chchd10	ENSMUSG00000049422	Chchd10	0.0145708	0.991241	1.08837	1.08837	173.79	159.679
Gtdc1	ENSMUSG00000036890	Gtdc1	0.0146621	0.991241	1.10853	1.10853	142.63	128.666
Map3k5	ENSMUSG00000071369	Map3k5	0.0148266	0.991241	0.916115	-1.09157	154.084	168.193
Fbxo11	ENSMUSG00000005371	Fbxo11	0.015357	0.991241	1.09204	1.09204	162.248	148.574
Dgka	ENSMUSG00000025357	Dgka	0.0155392	0.991241	1.09731	1.09731	117.726	107.287
Smim14	ENSMUSG00000037822	Smim14	0.01582	0.991241	1.05726	1.05726	335.854	317.663
H2-Q7	ENSMUSG00000060550	H2-Q7	0.0158815	0.991241	0.9332	-1.07158	198.773	213.001
Gm26740	ENSMUSG00000097705	Gm26740	0.0160872	0.991241	1.06127	1.06127	486.257	458.183
Id3	ENSMUSG00000007872	Id3	0.0161704	0.991241	0.910149	-1.09872	155.653	171.019
Eml4	ENSMUSG00000032624	Eml4	0.0164606	0.991241	1.06664	1.06664	353	330.946
Irf2	ENSMUSG00000031627	Irf2	0.0167562	0.991241	1.06283	1.06283	309.322	291.035
Csnk1g3	ENSMUSG00000073563	Csnk1g3	0.0174465	0.991241	1.08168	1.08168	167.756	155.088
Msn	ENSMUSG00000031207	Msn	0.0180811	0.991241	1.04597	1.04597	507.991	485.663
Kmt2c	ENSMUSG00000038056	Kmt2c	0.0183204	0.991241	1.08434	1.08434	184.987	170.598
Clec2i	ENSMUSG00000030365	Clec2i	0.0184316	0.991241	1.10202	1.10202	115.758	105.042
Apobec1	ENSMUSG00000040613	Apobec1	0.0184982	0.991241	0.899697	-1.11149	90.1148	100.161
Arid4b	ENSMUSG00000039219	Arid4b	0.018735	0.991241	1.07235	1.07235	212.677	198.329
Camk2d	ENSMUSG00000053819	Camk2d	0.0188803	0.991241	1.06296	1.06296	444.212	417.901
Jpt1	ENSMUSG00000020737	Jpt1	0.0189492	0.991241	0.93859	-1.06543	201.79	214.993
Akt3	ENSMUSG00000019699	Akt3	0.0190264	0.991241	1.09064	1.09064	207.609	190.355
Pik3c2b	ENSMUSG00000026447	Pik3c2b	0.0190982	0.991241	1.10439	1.10439	109.01	98.706
Galnt1	ENSMUSG00000000420	Galnt1	0.0191871	0.991241	1.07906	1.07906	155.188	143.818
Gm47283	ENSMUSG00000096768	Gm47283	0.0197256	0.991241	0.914293	-1.09374	119.634	130.849
Cd24a	ENSMUSG00000047139	Cd24a	0.0199173	0.991241	1.07715	1.07715	219.468	203.748
Tspan32	ENSMUSG00000000244	Tspan32	0.0200131	0.991241	1.06605	1.06605	216.915	203.476
B3gnt2	ENSMUSG00000051650	B3gnt2	0.0206896	0.991241	1.07397	1.07397	168.629	157.015
Pdia4	ENSMUSG00000025823	Pdia4	0.0212019	0.991241	0.93416	-1.07048	250.566	268.226
Ppp3ca	ENSMUSG00000028161	Ppp3ca	0.0213214	0.991241	1.05897	1.05897	599.845	566.443
Sh3kbp1	ENSMUSG00000040990	Sh3kbp1	0.0214507	0.991241	1.0651	1.0651	355.046	333.346
Iglc2	ENSMUSG00000076937	Iglc2	0.0217017	0.991241	1.04571	1.04571	1159.22	1108.56
Ociad1	ENSMUSG00000029152	Ociad1	0.0218399	0.991241	0.931269	-1.0738	130.294	139.91
Cct6a	ENSMUSG00000029447	Cct6a	0.022597	0.991241	0.909457	-1.09956	97.0859	106.751
Inpp4b	ENSMUSG00000037940	Inpp4b	0.0226217	0.991241	1.07901	1.07901	634.235	587.792
Itsn2	ENSMUSG00000020640	Itsn2	0.0228293	0.991241	1.06039	1.06039	320.045	301.817
Cd69	ENSMUSG00000030156	Cd69	0.0228953	0.991241	1.10258	1.10258	121.377	110.084
Fam172a	ENSMUSG00000064138	Fam172a	0.0230552	0.991241	1.07962	1.07962	246.308	228.143
Pecam1	ENSMUSG00000020717	Pecam1	0.0236111	0.991241	1.07646	1.07646	244.981	227.58
Gpr183	ENSMUSG00000051212	Gpr183	0.0236711	0.991241	1.07572	1.07572	228.637	212.544
Dynll1	ENSMUSG00000009013	Dynll1	0.0237315	0.991241	0.946165	-1.0569	325.006	343.499
Rap1gds1	ENSMUSG00000028149	Rap1gds1	0.0238035	0.991241	1.0794	1.0794	211.391	195.841
Sec61g	ENSMUSG00000078974	Sec61g	0.0239208	0.991241	0.948651	-1.05413	341.807	360.309
Cntrl	ENSMUSG00000057110	Cntrl	0.0242201	0.991241	1.08257	1.08257	124.267	114.789
Lmo2	ENSMUSG00000032698	Lmo2	0.0242325	0.991241	1.07331	1.07331	181.439	169.046
Cct7	ENSMUSG00000030007	Cct7	0.0242728	0.991241	0.928198	-1.07736	120.221	129.521
Cct3	ENSMUSG00000001416	Cct3	0.0243885	0.991241	0.919948	-1.08702	105.756	114.958
Hnrnph3	ENSMUSG00000020069	Hnrnph3	0.0247076	0.991241	0.934319	-1.0703	146.606	156.912
Tmem234	ENSMUSG00000028797	Tmem234	0.0248715	0.991241	0.934877	-1.06966	150.414	160.892
Lpgat1	ENSMUSG00000026623	Lpgat1	0.0250224	0.991241	1.0727	1.0727	174.176	162.371
Ptpn6	ENSMUSG00000004266	Ptpn6	0.0252856	0.991241	0.953426	-1.04885	394.926	414.218
Anxa6	ENSMUSG00000018340	Anxa6	0.0255154	0.991241	1.09018	1.09018	119.378	109.503
Dnajc7	ENSMUSG00000014195	Dnajc7	0.0255768	0.991241	0.938698	-1.06531	225.568	240.299
Fxyd5	ENSMUSG00000009687	Fxyd5	0.0257547	0.991241	1.088	1.088	126.384	116.162
Pacs1	ENSMUSG00000024855	Pacs1	0.0259142	0.991241	1.09848	1.09848	111.283	101.306
Tap1	ENSMUSG00000037321	Tap1	0.0260058	0.991241	0.9292	-1.07619	119.178	128.258
Cdk17	ENSMUSG00000020015	Cdk17	0.0266714	0.991241	1.08198	1.08198	149.047	137.754
Rasgrp1	ENSMUSG00000027347	Rasgrp1	0.0267876	0.991241	1.09917	1.09917	110.976	100.963
Gpi1	ENSMUSG00000036427	Gpi1	0.0271577	0.991241	0.939896	-1.06395	183.99	195.755
Klhl6	ENSMUSG00000043008	Klhl6	0.0271713	0.991241	0.924707	-1.08142	135.788	146.844
Fut8	ENSMUSG00000021065	Fut8	0.0271902	0.991241	0.874596	-1.14339	82.9051	94.7924
Psip1	ENSMUSG00000028484	Psip1	0.0281393	0.991241	0.926154	-1.07973	123.737	133.603
Tbc1d5	ENSMUSG00000023923	Tbc1d5	0.0281853	0.991241	1.08137	1.08137	249.382	230.616
Zbtb7a	ENSMUSG00000035011	Zbtb7a	0.0283112	0.991241	1.06865	1.06865	153.594	143.727
Nudc	ENSMUSG00000028851	Nudc	0.0283575	0.991241	0.922573	-1.08392	104.915	113.72
Pde7a	ENSMUSG00000069094	Pde7a	0.0283858	0.991241	1.06648	1.06648	288.325	270.351
Rbm39	ENSMUSG00000027620	Rbm39	0.0286328	0.991241	1.03364	1.03364	717.319	693.971
Chd2	ENSMUSG00000078671	Chd2	0.0290593	0.991241	1.07364	1.07364	230.692	214.869
Eif3m	ENSMUSG00000027170	Eif3m	0.0290805	0.991241	0.935024	-1.06949	148.853	159.197
Pkn2	ENSMUSG00000004591	Pkn2	0.0291713	0.991241	1.07315	1.07315	144.329	134.491
Gm19951	ENSMUSG00000113136	Gm19951	0.029447	0.991241	0.949718	-1.05294	630.638	664.026
Cybc1	ENSMUSG00000039294	Cybc1	0.0295395	0.991241	0.921804	-1.08483	102.745	111.461
Ero1lb	ENSMUSG00000057069	.	0.0297269	0.991241	1.07414	1.07414	239.996	223.431
Myl12b	ENSMUSG00000034868	Myl12b	0.0299325	0.991241	1.04308	1.04308	570.466	546.908
Grk2	ENSMUSG00000024858	Grk2	0.0305798	0.991241	1.06149	1.06149	196.159	184.795
Cnn2	ENSMUSG00000004665	Cnn2	0.0310812	0.991241	1.05479	1.05479	316.883	300.423
Osbpl9	ENSMUSG00000028559	Osbpl9	0.0310867	0.991241	1.07227	1.07227	171.936	160.347
Rubcn	ENSMUSG00000035629	Rubcn	0.0313818	0.991241	0.923992	-1.08226	121.729	131.743
Tbl1xr1	ENSMUSG00000027630	Tbl1xr1	0.0314239	0.991241	1.07783	1.07783	186.692	173.211
Fkbp4	ENSMUSG00000030357	Fkbp4	0.0315161	0.991241	0.921161	-1.08559	104.023	112.926
Ran	ENSMUSG00000029430	Ran	0.0317036	0.991241	0.942189	-1.06136	244.073	259.049
Eef1g	ENSMUSG00000071644	Eef1g	0.0323528	0.991241	0.951255	-1.05124	318.733	335.066
Dhx9	ENSMUSG00000042699	Dhx9	0.032587	0.991241	0.936058	-1.06831	163.083	174.223
Gm15987	ENSMUSG00000085786	Gm15987	0.032744	0.991241	0.935012	-1.0695	304.875	326.065
Rasa3	ENSMUSG00000031453	Rasa3	0.032872	0.991241	1.07571	1.07571	197.715	183.801
Shisa5	ENSMUSG00000025647	Shisa5	0.0329476	0.991241	1.03942	1.03942	622.845	599.223
Vpreb3	ENSMUSG00000000903	Vpreb3	0.0334762	0.991241	0.921985	-1.08462	210.296	228.09
Tln1	ENSMUSG00000028465	Tln1	0.0337523	0.991241	1.0556	1.0556	248.48	235.393
Clta	ENSMUSG00000028478	Clta	0.033984	0.991241	0.957557	-1.04432	365.561	381.765
Scaper	ENSMUSG00000034007	Scaper	0.0340989	0.991241	1.0891	1.0891	131.223	120.487
Bcl2	ENSMUSG00000057329	Bcl2	0.0341708	0.991241	1.07767	1.07767	270.875	251.352
Gmip	ENSMUSG00000036246	Gmip	0.0343582	0.991241	1.07106	1.07106	136.799	127.724
Snd1	ENSMUSG00000001424	Snd1	0.0345389	0.991241	0.918319	-1.08895	121.184	131.963
Pbrm1	ENSMUSG00000042323	Pbrm1	0.0349758	0.991241	1.07261	1.07261	138.531	129.154
Pabpn1	ENSMUSG00000022194	Pabpn1	0.0359974	0.991241	1.05611	1.05611	229.508	217.314
Rb1	ENSMUSG00000022105	Rb1	0.0362727	0.991241	1.07855	1.07855	175.847	163.04
Pdia3	ENSMUSG00000027248	Pdia3	0.0369052	0.991241	0.94664	-1.05637	272.765	288.141
Snx3	ENSMUSG00000019804	Snx3	0.0370976	0.991241	0.94345	-1.05994	176.867	187.469
Chst3	ENSMUSG00000057337	Chst3	0.0378994	0.991241	1.07298	1.07298	192.731	179.622
Gphn	ENSMUSG00000047454	Gphn	0.0379504	0.991241	0.94752	-1.05539	680.202	717.876
Dipk1a	ENSMUSG00000029270	Dipk1a	0.0382416	0.991241	1.06318	1.06318	271.997	255.834
Pak2	ENSMUSG00000022781	Pak2	0.0387613	0.991241	1.05347	1.05347	255.159	242.209
Stag1	ENSMUSG00000037286	Stag1	0.0393199	0.991241	1.07134	1.07134	213.928	199.683
Spib	ENSMUSG00000008193	Spib	0.0395914	0.991241	0.937691	-1.06645	171.964	183.391
Canx	ENSMUSG00000020368	Canx	0.0402334	0.991241	0.942365	-1.06116	203.893	216.363
Yy1	ENSMUSG00000021264	Yy1	0.0402669	0.991241	1.06444	1.06444	154.482	145.13
Map4k4	ENSMUSG00000026074	Map4k4	0.0405425	0.991241	1.07003	1.07003	137.01	128.043
Ankrd11	ENSMUSG00000035569	Ankrd11	0.0405431	0.991241	1.05203	1.05203	376.332	357.721
Ctsc	ENSMUSG00000030560	Ctsc	0.0406254	0.991241	1.06062	1.06062	208.024	196.135
Cd52	ENSMUSG00000000682	Cd52	0.0410649	0.991241	1.0368	1.0368	2340.23	2257.17
Smap2	ENSMUSG00000032870	Smap2	0.0412543	0.991241	1.05444	1.05444	291.42	276.376
Pds5a	ENSMUSG00000029202	Pds5a	0.0416509	0.991241	0.935329	-1.06914	153.065	163.648
Ppp1r18	ENSMUSG00000034595	Ppp1r18	0.0422592	0.991241	1.06426	1.06426	168.212	158.055
Kansl1	ENSMUSG00000018412	Kansl1	0.0422801	0.991241	1.05837	1.05837	299.875	283.338
H2-DMb1	ENSMUSG00000079547	H2-DMb1	0.0426184	0.991241	1.06747	1.06747	146.104	136.869
Ubl3	ENSMUSG00000001687	Ubl3	0.0431521	0.991241	1.0669	1.0669	145.743	136.605
Morc3	ENSMUSG00000039456	Morc3	0.0434092	0.991241	1.06902	1.06902	135.379	126.638
Dpm3	ENSMUSG00000042737	Dpm3	0.0435183	0.991241	1.06649	1.06649	159.718	149.76
Gapdh	ENSMUSG00000057666	Gapdh	0.0436265	0.991241	0.95488	-1.04725	395.142	413.814
Hnrnpa2b1	ENSMUSG00000004980	Hnrnpa2b1	0.0436832	0.991241	0.970419	-1.03048	869.333	895.832
Larp1	ENSMUSG00000037331	Larp1	0.0437622	0.991241	0.933605	-1.07112	128.366	137.495
Diaph2	ENSMUSG00000034480	Diaph2	0.0438251	0.991241	1.08801	1.08801	138.509	127.304
4933406I18Rik	ENSMUSG00000087475	4933406I18Rik	0.0445202	0.991241	0.884971	-1.12998	83.3159	94.1453
Pld4	ENSMUSG00000052160	Pld4	0.0446947	0.991241	1.07683	1.07683	134.645	125.039
Klf13	ENSMUSG00000052040	Klf13	0.0448273	0.991241	1.05724	1.05724	217.206	205.446
Plekhm3	ENSMUSG00000051344	Plekhm3	0.0450226	0.991241	1.07499	1.07499	193.536	180.035
Kpna4	ENSMUSG00000027782	Kpna4	0.0459043	0.991241	1.05886	1.05886	214.342	202.427
Cd84	ENSMUSG00000038147	Cd84	0.0459482	0.991241	1.06979	1.06979	154.947	144.838
Apc	ENSMUSG00000005871	Apc	0.0465205	0.991241	1.07457	1.07457	149.112	138.764
Dyrk1a	ENSMUSG00000022897	Dyrk1a	0.0470443	0.991241	1.0784	1.0784	135.653	125.791
Tmod3	ENSMUSG00000058587	Tmod3	0.0475722	0.991241	1.05492	1.05492	244.157	231.446
Ddx39b	ENSMUSG00000019432	Ddx39b	0.0476042	0.991241	0.945954	-1.05713	180.364	190.669
Pou2f1	ENSMUSG00000026565	Pou2f1	0.0476467	0.991241	1.08327	1.08327	113.115	104.42
Tra2b	ENSMUSG00000022858	Tra2b	0.0478251	0.991241	1.05439	1.05439	208.115	197.38
Rin3	ENSMUSG00000044456	Rin3	0.0479423	0.991241	1.07961	1.07961	115.56	107.038
Ube2d3	ENSMUSG00000078578	Ube2d3	0.048855	0.991241	1.04665	1.04665	291.515	278.521
Macf1	ENSMUSG00000028649	Macf1	0.0492174	0.991241	1.04556	1.04556	695.99	665.665
Arhgdib	ENSMUSG00000030220	Arhgdib	0.0497646	0.991241	1.03063	1.03063	1023.26	992.855

## Sheet: Spleen_New MI vs sham
Gene ID	Ensembl ID	Gene name	P-value	FDR step up	Ratio	Fold change	LSMean(recentMI)	LSMean(sham)		Genes differentially expressed in antigen processing and presentation
Hsp90aa1	ENSMUSG00000021270	Hsp90aa1	8.5052e-11	6.5098e-09	0.824259	-1.21321	208.908	253.449		Gene Symbol	Gene Description
Hsph1	ENSMUSG00000029657	Hsph1	2.9935e-07	1.38011e-05	0.782632	-1.27774	91.0165	116.295		HSP90AA1	heat shock protein 90 alpha family class A member 1
Dnaja1	ENSMUSG00000028410	Dnaja1	2.27831e-19	4.50922e-17	0.789621	-1.26643	294.48	372.939		HSP90AB1	heat shock protein 90 alpha family class B member 1
Hspe1	ENSMUSG00000073676	Hspe1	8.87927e-21	2.02303e-18	0.775032	-1.29027	265.807	342.963		HLA-DQA1	major histocompatibility complex, class II, DQ alpha 1
Hsp90ab1	ENSMUSG00000023944	Hsp90ab1	1.91361e-30	1.87477e-27	0.829601	-1.2054	1508.87	1818.78		HSPA8	heat shock protein family A (Hsp70) member 8
Chordc1	ENSMUSG00000001774	Chordc1	5.21984e-05	0.00165498	0.864355	-1.15693	113.482	131.291		HLA-A	major histocompatibility complex, class I, A
Hspa8	ENSMUSG00000015656	Hspa8	1.68166e-22	4.51377e-20	0.833921	-1.19916	898.048	1076.9		HLA-B	major histocompatibility complex, class I, B
Apoe	ENSMUSG00000002985	Apoe	1.56606e-06	6.57073e-05	0.79063	-1.26481	138.189	174.784		IFI30	IFI30 lysosomal thiol reductase
Gm43305	ENSMUSG00000105703	Gm43305	1.85239e-15	2.38788e-13	1.23228	1.23228	1310.13	1063.18		B2M	beta-2-microglobulin
Stip1	ENSMUSG00000024966	Stip1	0.000200756	0.00570917	0.862149	-1.15989	104.433	121.131		CD74	CD74 molecule
Ahsa1	ENSMUSG00000021037	Ahsa1	2.85137e-06	0.000113788	0.84461	-1.18398	107.985	127.852
Hspd1	ENSMUSG00000025980	Hspd1	0.00896478	0.163097	0.916334	-1.09131	178.911	195.247
Cacybp	ENSMUSG00000014226	Cacybp	1.99319e-06	8.17039e-05	0.848224	-1.17893	126.283	148.879
Ddit4	ENSMUSG00000020108	Ddit4	4.45913e-07	1.9948e-05	1.19483	1.19483	188.161	157.479
Ptpn22	ENSMUSG00000027843	Ptpn22	9.38541e-27	5.10827e-24	1.52972	1.52972	223.791	146.295
Ptges3	ENSMUSG00000071072	Ptges3	0.000989655	0.0241185	0.912371	-1.09605	196.72	215.614
Sorl1	ENSMUSG00000049313	Sorl1	2.9015e-32	3.34424e-29	1.37291	1.37291	549.86	400.506
Gm42031	ENSMUSG00000110386	Gm42031	0.00476844	0.0958286	0.916036	-1.09166	177.226	193.471
Ywhah	ENSMUSG00000018965	Ywhah	2.20927e-10	1.59736e-08	0.820035	-1.21946	142.896	174.256
Hsp90b1	ENSMUSG00000020048	Hsp90b1	0.000166556	0.00482765	0.912233	-1.09621	507.671	556.515
Ccnd3	ENSMUSG00000034165	Ccnd3	1.43023e-40	5.60477e-37	1.40372	1.40372	731.809	521.337
Ppp1r21	ENSMUSG00000034709	Ppp1r21	5.72423e-05	0.00180904	1.14889	1.14889	157.958	137.488
Cep85	ENSMUSG00000037443	Cep85	1.33357e-07	6.56534e-06	0.829651	-1.20533	177.494	213.938
Cd72	ENSMUSG00000028459	Cd72	1.90615e-10	1.38844e-08	0.831285	-1.20296	223.724	269.131
Pdcd4	ENSMUSG00000024975	Pdcd4	6.60592e-08	3.38839e-06	1.135	1.135	445.199	392.245
Pde3b	ENSMUSG00000030671	Pde3b	2.46616e-15	3.09756e-13	1.3967	1.3967	218.953	156.765
St13	ENSMUSG00000022403	St13	0.0404875	0.572788	0.934977	-1.06955	141.514	151.355
Pou2af1	ENSMUSG00000032053	Pou2af1	1.76606e-05	0.000610302	1.13148	1.13148	319.927	282.752
Acp5	ENSMUSG00000001348	Acp5	4.46574e-09	2.83177e-07	0.84328	-1.18585	190.121	225.454
Tank	ENSMUSG00000064289	Tank	6.28882e-08	3.2342e-06	1.20963	1.20963	263.221	217.604
Ifi30	ENSMUSG00000031838	Ifi30	3.12344e-22	7.84624e-20	0.75701	-1.32099	334.986	442.511
Stat1	ENSMUSG00000026104	Stat1	0.00584548	0.11408	1.09386	1.09386	249.828	228.392
Hvcn1	ENSMUSG00000064267	Hvcn1	3.62939e-05	0.00117157	1.11432	1.11432	346.246	310.725
Irf8	ENSMUSG00000041515	Irf8	0.00705621	0.133713	0.93021	-1.07503	246.128	264.594
Jchain	ENSMUSG00000067149	Jchain	0.0211352	0.33569	0.926758	-1.07903	330.782	356.923
Gns	ENSMUSG00000034707	Gns	0.0240681	0.373094	1.08017	1.08017	179.767	166.425
Ifi27l2a	ENSMUSG00000079017	Ifi27l2a	6.49841e-05	0.00204054	1.14645	1.14645	444.872	388.042
Erp29	ENSMUSG00000029616	Erp29	8.33482e-13	7.92779e-11	0.828133	-1.20754	209.368	252.819
Arap2	ENSMUSG00000037999	Arap2	2.45925e-13	2.50972e-11	1.25637	1.25637	295.758	235.406
Nsf	ENSMUSG00000034187	Nsf	7.78432e-05	0.00240577	1.13836	1.13836	203.997	179.202
H2-Q6	ENSMUSG00000073409	H2-Q6	0.0130409	0.225329	0.932941	-1.07188	208.457	223.441
Nr3c1	ENSMUSG00000024431	Nr3c1	5.3874e-08	2.80002e-06	1.17772	1.17772	298.659	253.59
Mtss1	ENSMUSG00000022353	Mtss1	5.26289e-06	0.000199847	1.15681	1.15681	256.792	221.984
Chchd2	ENSMUSG00000070493	Chchd2	1.01503e-09	6.8818e-08	0.845858	-1.18223	197.976	234.054
Id3	ENSMUSG00000007872	Id3	2.99156e-08	1.64192e-06	0.803787	-1.24411	137.463	171.019
Ubxn4	ENSMUSG00000026353	Ubxn4	0.0302955	0.449705	0.926979	-1.07877	123.116	132.814
Zfp36l2	ENSMUSG00000045817	Zfp36l2	1.51278e-46	1.48207e-42	1.58293	1.58293	264.283	166.958
Pcmtd1	ENSMUSG00000051285	Pcmtd1	0.00201963	0.044816	1.10807	1.10807	187.018	168.778
Gm47283	ENSMUSG00000096768	Gm47283	1.15912e-05	0.000415967	1.18084	1.18084	154.511	130.849
Psmb2	ENSMUSG00000028837	Psmb2	0.0201061	0.322918	0.932358	-1.07255	139.971	150.126
Map3k5	ENSMUSG00000071369	Map3k5	0.0147332	0.250375	1.0902	1.0902	183.364	168.193
Mrfap1	ENSMUSG00000055302	Mrfap1	0.00656916	0.125945	0.911321	-1.09731	114.243	125.359
Snd1	ENSMUSG00000001424	Snd1	6.18436e-06	0.000231695	1.19704	1.19704	157.966	131.963
2410006H16Rik	ENSMUSG00000086841	2410006H16Rik	7.7674e-28	5.07315e-25	0.754653	-1.32511	310.27	411.142
Fkbp4	ENSMUSG00000030357	Fkbp4	0.0107839	0.191395	0.907201	-1.10229	102.447	112.926
Cybc1	ENSMUSG00000039294	Cybc1	0.00174201	0.0395974	0.889367	-1.1244	99.1299	111.461
Vpreb3	ENSMUSG00000000903	Vpreb3	2.37008e-24	8.44352e-22	0.671318	-1.48961	153.121	228.09
H2afz	ENSMUSG00000037894	.	1.98286e-10	1.43897e-08	0.827822	-1.20799	211.073	254.974
Cdk2ap2	ENSMUSG00000024856	Cdk2ap2	1.62943e-08	9.47391e-07	0.833546	-1.19969	139.294	167.111
Uqcrq	ENSMUSG00000044894	Uqcrq	2.27688e-06	9.25584e-05	0.863803	-1.15767	154.924	179.351
Psip1	ENSMUSG00000028484	Psip1	0.00981009	0.176025	0.913689	-1.09446	122.072	133.603
Srp9	ENSMUSG00000026511	Srp9	6.14628e-05	0.00193618	0.889712	-1.12396	154.76	173.944
Cct7	ENSMUSG00000030007	Cct7	0.00532266	0.105239	0.911915	-1.09659	118.112	129.521
Arl6ip1	ENSMUSG00000030654	Arl6ip1	1.71853e-10	1.2659e-08	0.873537	-1.14477	355.191	406.613
Ifi203	ENSMUSG00000039997	Ifi203	0.0488508	0.670296	1.0536	1.0536	318.025	301.847
mt-Co1	ENSMUSG00000064351	mt-Co1	3.86988e-13	3.84906e-11	0.909436	-1.09958	4239.22	4661.37
H2-Q7	ENSMUSG00000060550	H2-Q7	0.00410579	0.0840635	0.92092	-1.08587	196.157	213.001
Larp1	ENSMUSG00000037331	Larp1	0.00305109	0.0649816	1.10475	1.10475	151.897	137.495
Cmss1	ENSMUSG00000022748	Cmss1	4.94883e-16	6.68741e-14	0.867423	-1.15284	5874.16	6771.97
Pdia4	ENSMUSG00000025823	Pdia4	0.00832371	0.153573	0.924938	-1.08115	248.092	268.226
Psmb9	ENSMUSG00000096727	Psmb9	1.31879e-08	7.71356e-07	0.856695	-1.16728	198.794	232.048
Tmem234	ENSMUSG00000028797	Tmem234	0.0165059	0.273983	0.930611	-1.07456	149.728	160.892
Gm15987	ENSMUSG00000085786	Gm15987	2.15144e-07	1.02071e-05	1.17252	1.17252	382.319	326.065
Eif3m	ENSMUSG00000027170	Eif3m	0.0178511	0.29204	0.929712	-1.0756	148.008	159.197
Pkig	ENSMUSG00000035268	Pkig	1.26014e-07	6.21942e-06	1.11717	1.11717	480.183	429.82
Pds5a	ENSMUSG00000029202	Pds5a	0.000328366	0.00899861	1.12248	1.12248	183.692	163.648
Dhx9	ENSMUSG00000042699	Dhx9	0.000721215	0.0182814	1.10762	1.10762	192.973	174.223
Mir142hg	ENSMUSG00000084796	Mir142hg	0.00647627	0.124408	0.952361	-1.05002	616.235	647.061
Spib	ENSMUSG00000008193	Spib	1.36788e-06	5.78883e-05	0.858679	-1.16458	157.474	183.391
Jpt1	ENSMUSG00000020737	Jpt1	0.000510352	0.0134587	0.910027	-1.09887	195.649	214.993
Dnajc7	ENSMUSG00000014195	Dnajc7	0.0101014	0.180921	0.929654	-1.07567	223.395	240.299
Gpi1	ENSMUSG00000036427	Gpi1	0.00235062	0.0513468	0.917985	-1.08934	179.701	195.755
Hmgn1	ENSMUSG00000040681	Hmgn1	1.32545e-05	0.000467942	0.89919	-1.11211	301.294	335.073
Ran	ENSMUSG00000029430	Ran	0.0127816	0.221827	0.933276	-1.07149	241.765	259.049
Zfp706	ENSMUSG00000062397	Zfp706	3.12703e-16	4.31486e-14	0.819751	-1.21988	240.156	292.962
H2-K1	ENSMUSG00000061232	H2-K1	2.79838e-14	3.15123e-12	0.901902	-1.10877	1319.61	1463.14
Dynll1	ENSMUSG00000009013	Dynll1	5.42877e-12	4.70669e-10	0.842068	-1.18755	289.249	343.499
mt-Co3	ENSMUSG00000064358	mt-Co3	4.13007e-08	2.19308e-06	0.929913	-1.07537	3223.5	3466.45
Sec61g	ENSMUSG00000078974	Sec61g	1.6659e-17	2.67555e-15	0.815397	-1.2264	293.795	360.309
B2m	ENSMUSG00000060802	B2m	1.54103e-13	1.62338e-11	0.886627	-1.12787	928.207	1046.9
Ptpn6	ENSMUSG00000004266	Ptpn6	0.0213668	0.338723	0.952242	-1.05015	394.435	414.218
Gapdh	ENSMUSG00000057666	Gapdh	2.88921e-05	0.000961141	0.908215	-1.10106	375.832	413.814
Clta	ENSMUSG00000028478	Clta	1.85631e-09	1.23296e-07	0.882641	-1.13296	336.961	381.765
mt-Co2	ENSMUSG00000064354	mt-Co2	2.47158e-05	0.000836409	0.946198	-1.05686	2627.58	2776.99
Ubb	ENSMUSG00000019505	Ubb	1.33285e-18	2.48722e-16	0.875802	-1.14181	1314.53	1500.94
Arhgdib	ENSMUSG00000030220	Arhgdib	2.26482e-08	1.26791e-06	0.916429	-1.09119	909.881	992.855
Cd52	ENSMUSG00000000682	Cd52	4.20116e-31	4.5732e-28	0.81227	-1.23112	1833.43	2257.17
H2-Eb1	ENSMUSG00000060586	H2-Eb1	0.000168005	0.00486245	0.954247	-1.04795	2990.06	3133.43
Shisa5	ENSMUSG00000025647	Shisa5	0.0005888	0.0152002	1.06382	1.06382	637.463	599.223
Myl12b	ENSMUSG00000034868	Myl12b	1.08892e-07	5.41529e-06	0.899857	-1.11129	492.139	546.908
Actg1	ENSMUSG00000062825	Actg1	0.000755091	0.0191153	0.944593	-1.05866	1205.6	1276.32
Cd79b	ENSMUSG00000040592	Cd79b	6.7432e-29	5.28505e-26	0.844604	-1.18399	1372.83	1625.42
Macf1	ENSMUSG00000028649	Macf1	3.60344e-14	3.98903e-12	1.18425	1.18425	788.314	665.665
Iglc2	ENSMUSG00000076937	Iglc2	1.28562e-24	4.7529e-22	0.81567	-1.22599	904.216	1108.56
Ankrd11	ENSMUSG00000035569	Ankrd11	1.33643e-09	8.96784e-08	1.15918	1.15918	414.662	357.721
Pak2	ENSMUSG00000022781	Pak2	1.52739e-05	0.000534422	1.11364	1.11364	269.732	242.209
Fah	ENSMUSG00000030630	Fah	1.40734e-07	6.87664e-06	0.894644	-1.11776	375.373	419.578
Tra2b	ENSMUSG00000022858	Tra2b	0.00382838	0.0789613	1.07999	1.07999	213.169	197.38
Smap2	ENSMUSG00000032870	Smap2	2.15385e-08	1.21272e-06	1.15375	1.15375	318.867	276.376
Cnn2	ENSMUSG00000004665	Cnn2	0.0329829	0.482649	0.94776	-1.05512	284.729	300.423
Tmod3	ENSMUSG00000058587	Tmod3	0.000821582	0.0206386	1.09374	1.09374	253.141	231.446
Smim14	ENSMUSG00000037822	Smim14	0.000132946	0.00392312	0.913462	-1.09474	290.174	317.663
Arhgap45	ENSMUSG00000035697	Arhgap45	0.00374079	0.077481	0.938783	-1.06521	388.758	414.108
Iqgap1	ENSMUSG00000030536	Iqgap1	0.000218218	0.00613451	1.08469	1.08469	380.968	351.224
Kansl1	ENSMUSG00000018412	Kansl1	8.26744e-14	8.90067e-12	1.22637	1.22637	347.476	283.338
Ets1	ENSMUSG00000032035	Ets1	2.85988e-19	5.55509e-17	1.20615	1.20615	663.149	549.806
Kpna4	ENSMUSG00000027782	Kpna4	3.78997e-06	0.000148521	1.13971	1.13971	230.708	202.427
Ppp3ca	ENSMUSG00000028161	Ppp3ca	1.65025e-29	1.53976e-26	1.31613	1.31613	745.512	566.443
Bank1	ENSMUSG00000037922	Bank1	2.38442e-33	3.89336e-30	1.26954	1.26954	2557.5	2014.51
Itsn2	ENSMUSG00000020640	Itsn2	4.47808e-10	3.10047e-08	1.17105	1.17105	353.443	301.817
Gm26740	ENSMUSG00000097705	Gm26740	7.70774e-08	3.92274e-06	1.14039	1.14039	522.508	458.183
Irf2	ENSMUSG00000031627	Irf2	4.42006e-06	0.000170485	1.12263	1.12263	326.724	291.035
Camk2d	ENSMUSG00000053819	Camk2d	2.126e-15	2.72267e-13	1.22465	1.22465	511.781	417.901
Dipk1a	ENSMUSG00000029270	Dipk1a	1.06442e-07	5.32597e-06	1.16765	1.16765	298.724	255.834
Snx2	ENSMUSG00000034484	Snx2	1.93498e-13	1.99338e-11	1.17233	1.17233	492.991	420.523
Ppp1r18	ENSMUSG00000034595	Ppp1r18	0.000859795	0.0214064	0.901255	-1.10956	142.448	158.055
Akap13	ENSMUSG00000066406	Akap13	1.08172e-14	1.27682e-12	1.18975	1.18975	511.244	429.706
Sh3kbp1	ENSMUSG00000040990	Sh3kbp1	2.45084e-12	2.21299e-10	1.20779	1.20779	402.61	333.346
Igkc	ENSMUSG00000076609	Igkc	9.05662e-16	1.18304e-13	0.855068	-1.1695	1163.99	1361.29
Pde7a	ENSMUSG00000069094	Pde7a	7.87567e-05	0.00242635	1.12189	1.12189	303.304	270.351
Dpm3	ENSMUSG00000042737	Dpm3	0.000137154	0.00403512	0.883745	-1.13155	132.349	149.76
Eml4	ENSMUSG00000032624	Eml4	1.13756e-11	9.32607e-10	1.19664	1.19664	396.024	330.946
Ebf1	ENSMUSG00000057098	Ebf1	5.31622e-27	3.06371e-24	1.21649	1.21649	2888.56	2374.51
Morc3	ENSMUSG00000039456	Morc3	0.000126997	0.00376458	1.13422	1.13422	143.635	126.638
Cd84	ENSMUSG00000038147	Cd84	0.000460994	0.0123062	1.12498	1.12498	162.94	144.838
Ptbp3	ENSMUSG00000028382	Ptbp3	3.05822e-10	2.13248e-08	1.15954	1.15954	400.824	345.676
Map4k4	ENSMUSG00000026074	Map4k4	0.000116202	0.00347084	1.13502	1.13502	145.331	128.043
Coro1a	ENSMUSG00000030707	Coro1a	0.000104006	0.0031304	0.940081	-1.06374	988.375	1051.37
Stag1	ENSMUSG00000037286	Stag1	7.96561e-14	8.6231e-12	1.27724	1.27724	255.043	199.683
Arid4b	ENSMUSG00000039219	Arid4b	1.27744e-08	7.53919e-07	1.18118	1.18118	234.263	198.329
Lpgat1	ENSMUSG00000026623	Lpgat1	1.93751e-05	0.000664863	1.14184	1.14184	185.402	162.371
Chst3	ENSMUSG00000057337	Chst3	0.00415056	0.0848914	1.10182	1.10182	197.911	179.622
Pkn2	ENSMUSG00000004591	Pkn2	8.94373e-08	4.51658e-06	1.18675	1.18675	159.608	134.491
Rbm3	ENSMUSG00000031167	Rbm3	0.00930289	0.168311	0.939156	-1.06479	311.603	331.79
Chd2	ENSMUSG00000078671	Chd2	8.1272e-06	0.000295993	1.15479	1.15479	248.127	214.869
B3gnt2	ENSMUSG00000051650	B3gnt2	0.000409151	0.0110578	1.11449	1.11449	174.992	157.015
Ero1lb	ENSMUSG00000057069	.	2.70646e-05	0.000906501	1.1468	1.1468	256.229	223.431
Ost4	ENSMUSG00000038803	Ost4	0.000215002	0.00606151	0.907188	-1.10231	219.633	242.103
Apc	ENSMUSG00000005871	Apc	1.95762e-09	1.29586e-07	1.23899	1.23899	171.926	138.764
Plekhm3	ENSMUSG00000051344	Plekhm3	0.00229279	0.0503078	1.11585	1.11585	200.891	180.035
Gpr183	ENSMUSG00000051212	Gpr183	4.91078e-09	3.10393e-07	1.20446	1.20446	256.002	212.544
1810026B05Rik	ENSMUSG00000101970	.	1.70492e-09	1.13627e-07	1.174	1.174	254.289	216.599
Crlf3	ENSMUSG00000017561	Crlf3	2.7535e-11	2.19318e-09	1.18987	1.18987	313.932	263.837
Pecam1	ENSMUSG00000020717	Pecam1	4.12766e-08	2.19308e-06	1.19281	1.19281	271.46	227.58
Cd24a	ENSMUSG00000047139	Cd24a	1.88127e-05	0.000646693	0.869282	-1.15038	177.115	203.748
Bcl2	ENSMUSG00000057329	Bcl2	4.36497e-11	3.38052e-09	1.25771	1.25771	316.128	251.352
Tbl1xr1	ENSMUSG00000027630	Tbl1xr1	3.40994e-05	0.00110803	1.15411	1.15411	199.904	173.211
Dyrk1a	ENSMUSG00000022897	Dyrk1a	3.6036e-08	1.93449e-06	1.23078	1.23078	154.822	125.791
Rb1	ENSMUSG00000022105	Rb1	1.41269e-10	1.0565e-08	1.25646	1.25646	204.853	163.04
Nfatc3	ENSMUSG00000031902	Nfatc3	2.035e-05	0.000697093	1.12351	1.12351	273.213	243.177
Prkce	ENSMUSG00000045038	Prkce	1.08451e-11	8.92853e-10	1.22955	1.22955	408.165	331.963
Inpp4b	ENSMUSG00000037940	Inpp4b	2.20809e-22	5.6928e-20	1.37768	1.37768	809.789	587.792
Galnt1	ENSMUSG00000000420	Galnt1	0.00179374	0.0406317	1.10639	1.10639	159.119	143.818
Btg2	ENSMUSG00000020423	Btg2	0.00579669	0.113241	0.918507	-1.08872	164.599	179.203
Pax5	ENSMUSG00000014030	Pax5	2.15721e-11	1.73944e-09	1.15695	1.15695	736.924	636.953
Rap1gds1	ENSMUSG00000028149	Rap1gds1	8.53095e-13	8.03632e-11	1.26788	1.26788	248.303	195.841
Fam172a	ENSMUSG00000064138	Fam172a	2.88533e-14	3.23058e-12	1.28583	1.28583	293.353	228.143
Zfp36l1	ENSMUSG00000021127	Zfp36l1	1.27421e-05	0.000451481	1.09307	1.09307	653.191	597.576
Spag9	ENSMUSG00000020859	Spag9	2.77125e-10	1.95323e-08	1.21611	1.21611	246.996	203.103
Wasf2	ENSMUSG00000028868	Wasf2	0.000410051	0.0110669	1.09219	1.09219	272.24	249.262
Tbc1d5	ENSMUSG00000023923	Tbc1d5	2.23699e-10	1.61145e-08	1.2497	1.2497	288.201	230.616
Rapgef6	ENSMUSG00000037533	Rapgef6	3.98783e-17	6.01058e-15	1.25543	1.25543	346.896	276.317
Csnk1g3	ENSMUSG00000073563	Csnk1g3	3.66046e-08	1.95431e-06	1.19694	1.19694	185.631	155.088
Ubac2	ENSMUSG00000041765	Ubac2	0.00035623	0.00969439	1.12088	1.12088	172.92	154.271
Cdk17	ENSMUSG00000020015	Cdk17	1.09477e-07	5.43062e-06	1.20568	1.20568	166.088	137.754
Cntrl	ENSMUSG00000057110	Cntrl	0.00300025	0.0641078	1.10992	1.10992	127.406	114.789
Dock11	ENSMUSG00000031093	Dock11	1.1243e-14	1.31913e-12	1.26339	1.26339	281.017	222.431
Pou2f1	ENSMUSG00000026565	Pou2f1	9.97518e-05	0.00301626	1.16968	1.16968	122.138	104.42
Kmt2c	ENSMUSG00000038056	Kmt2c	8.41944e-13	7.96959e-11	1.27289	1.27289	217.152	170.598
Ptprc	ENSMUSG00000026395	Ptprc	1.63494e-23	5.00547e-21	1.2225	1.2225	1255.58	1027.06
Rap1b	ENSMUSG00000052681	Rap1b	1.35255e-05	0.000476652	1.11275	1.11275	285.496	256.569
Fxyd5	ENSMUSG00000009687	Fxyd5	0.0176751	0.289813	1.09383	1.09383	127.061	116.162
Diaph2	ENSMUSG00000034480	Diaph2	5.5529e-12	4.77208e-10	1.33014	1.33014	169.332	127.304
Notch2	ENSMUSG00000027878	Notch2	5.93367e-13	5.75566e-11	1.27309	1.27309	212.856	167.195
Chchd10	ENSMUSG00000049422	Chchd10	0.0118371	0.208201	0.915308	-1.09253	146.155	159.679
Scaper	ENSMUSG00000034007	Scaper	0.0035832	0.0746114	1.12428	1.12428	135.462	120.487
Smchd1	ENSMUSG00000024054	Smchd1	2.91385e-08	1.60828e-06	1.16041	1.16041	311.516	268.453
Ighd	ENSMUSG00000104213	Ighd	3.59527e-07	1.63827e-05	1.11157	1.11157	648.119	583.068
Ripor2	ENSMUSG00000036006	Ripor2	5.36865e-20	1.13111e-17	1.23449	1.23449	1080.95	875.62
Akt3	ENSMUSG00000019699	Akt3	1.92846e-18	3.49873e-16	1.37328	1.37328	261.411	190.355
Stk10	ENSMUSG00000020272	Stk10	0.0244677	0.37839	1.06943	1.06943	195.473	182.783
Fbxo11	ENSMUSG00000005371	Fbxo11	3.0834e-17	4.79493e-15	1.35096	1.35096	200.716	148.574
Srebf2	ENSMUSG00000022463	Srebf2	9.09655e-05	0.00277197	1.1454	1.1454	131.165	114.515
Srsf5	ENSMUSG00000021134	Srsf5	5.29356e-09	3.32443e-07	1.18246	1.18246	197.418	166.955
Pxk	ENSMUSG00000033885	Pxk	2.73461e-07	1.27576e-05	1.15079	1.15079	290.544	252.473
Atp2b1	ENSMUSG00000019943	Atp2b1	2.62696e-23	7.68248e-21	1.39889	1.39889	213.848	152.869
Itga4	ENSMUSG00000027009	Itga4	4.49023e-16	6.10983e-14	1.26396	1.26396	343.735	271.951
Pacs1	ENSMUSG00000024855	Pacs1	0.00676189	0.129009	1.12091	1.12091	113.555	101.306
Fus	ENSMUSG00000030795	Fus	6.41019e-13	6.16248e-11	1.19843	1.19843	317.48	264.913
Fcer2a	ENSMUSG00000005540	Fcer2a	0.00252067	0.0547561	1.1015	1.1015	281.066	255.167
4930523C07Rik	ENSMUSG00000090394	4930523C07Rik	9.26703e-05	0.00281517	1.10559	1.10559	297.943	269.488
Bach2	ENSMUSG00000040270	Bach2	4.08556e-18	7.08429e-16	1.27428	1.27428	1071.39	840.784
Fchsd2	ENSMUSG00000030691	Fchsd2	1.29753e-17	2.13645e-15	1.27106	1.27106	676.084	531.907
Foxp1	ENSMUSG00000030067	Foxp1	1.24369e-39	4.06146e-36	1.30738	1.30738	2044.65	1563.93
Slc9a7	ENSMUSG00000037341	Slc9a7	2.2758e-10	1.63341e-08	1.2323	1.2323	284.217	230.64
Prkcb	ENSMUSG00000052889	Prkcb	4.03704e-18	7.06265e-16	1.20435	1.20435	827.749	687.3
Cd69	ENSMUSG00000030156	Cd69	6.72043e-06	0.000249668	1.21241	1.21241	133.467	110.084
Setbp1	ENSMUSG00000024548	Setbp1	4.55408e-06	0.000174966	1.18888	1.18888	290.209	244.102
Ypel3	ENSMUSG00000042675	Ypel3	0.00364856	0.0758111	0.914839	-1.09309	176.514	192.945
Hivep2	ENSMUSG00000015501	Hivep2	3.40071e-08	1.83563e-06	1.19951	1.19951	327.222	272.795
Snx9	ENSMUSG00000002365	Snx9	1.53356e-07	7.45624e-06	1.15825	1.15825	245.402	211.873
Gtdc1	ENSMUSG00000036890	Gtdc1	1.36098e-06	5.77208e-05	1.22495	1.22495	157.609	128.666
Aff3	ENSMUSG00000037138	Aff3	1.59072e-28	1.1135e-25	1.32079	1.32079	1044.35	790.699
Bcl11a	ENSMUSG00000000861	Bcl11a	8.55503e-16	1.12502e-13	1.25551	1.25551	534.587	425.792
S100a10	ENSMUSG00000041959	S100a10	7.85912e-05	0.00242507	0.876749	-1.14058	203.443	232.043
Stap1	ENSMUSG00000029254	Stap1	3.2865e-13	3.30235e-11	1.2271	1.2271	294.784	240.228
Gimap6	ENSMUSG00000047867	Gimap6	0.0052234	0.103801	1.06139	1.06139	431.22	406.28
Zfp36	ENSMUSG00000044786	Zfp36	0.0208485	0.332659	0.930357	-1.07486	178.111	191.443
Cytip	ENSMUSG00000026832	Cytip	8.19645e-12	6.89276e-10	1.2046	1.2046	278.183	230.934
Card11	ENSMUSG00000036526	Card11	3.71019e-07	1.68281e-05	1.16677	1.16677	268.957	230.514
Rel	ENSMUSG00000020275	Rel	6.41598e-13	6.16248e-11	1.21322	1.21322	366.705	302.259
Elmsan1	ENSMUSG00000042507	.	0.00191715	0.0430294	1.10687	1.10687	158.71	143.386
Nedd9	ENSMUSG00000021365	Nedd9	4.9085e-13	4.83303e-11	1.2136	1.2136	747.116	615.622
Ralgps2	ENSMUSG00000026594	Ralgps2	2.31546e-21	5.46616e-19	1.20821	1.20821	1089.28	901.561
Cobll1	ENSMUSG00000034903	Cobll1	2.17613e-06	8.86469e-05	1.20591	1.20591	146.118	121.168
Fli1	ENSMUSG00000016087	Fli1	2.59514e-07	1.21358e-05	1.15267	1.15267	399.134	346.269
Lsp1	ENSMUSG00000018819	Lsp1	0.0227036	0.355405	0.946217	-1.05684	324.091	342.512
Ankrd44	ENSMUSG00000052331	Ankrd44	6.12382e-22	1.51886e-19	1.29864	1.29864	498.13	383.577
Iglc3	ENSMUSG00000105547	Iglc3	1.88929e-17	3.00966e-15	0.840302	-1.19005	790.243	940.427
Tagln2	ENSMUSG00000026547	Tagln2	0.0267638	0.407332	1.1023	1.1023	147.592	133.895
Emp3	ENSMUSG00000040212	Emp3	0.0104732	0.186896	0.901894	-1.10878	131.201	145.472
Dennd4a	ENSMUSG00000053641	Dennd4a	1.2314e-38	3.01601e-35	1.52125	1.52125	434.263	285.465
Ccr7	ENSMUSG00000037944	Ccr7	0.000101984	0.00307902	1.17397	1.17397	157.944	134.538
Tmem163	ENSMUSG00000026347	Tmem163	0.000290776	0.00804726	1.14449	1.14449	282.527	246.858
Add3	ENSMUSG00000025026	Add3	4.97738e-13	4.87634e-11	1.2283	1.2283	350.601	285.437
Igkv14-111	ENSMUSG00000095771	Igkv14-111	0.00661439	0.126441	0.836434	-1.19555	168.254	201.156
Rasgef1b	ENSMUSG00000089809	Rasgef1b	8.36456e-09	5.04293e-07	1.24591	1.24591	184.71	148.253
Pgap1	ENSMUSG00000073678	Pgap1	3.0595e-24	1.03358e-21	1.50262	1.50262	192.487	128.101
Fry	ENSMUSG00000056602	Fry	4.14453e-05	0.00132693	1.19736	1.19736	151.02	126.128
Stk17b	ENSMUSG00000026094	Stk17b	1.62392e-26	7.95479e-24	1.26603	1.26603	557.352	440.238
Pde4b	ENSMUSG00000028525	Pde4b	0.000340649	0.00932218	1.11421	1.11421	253.453	227.474
Cd55	ENSMUSG00000026399	Cd55	5.96212e-06	0.000224657	1.14201	1.14201	357.39	312.949
Plaur	ENSMUSG00000046223	Plaur	1.13536e-10	8.54862e-09	1.25679	1.25679	218.092	173.531
Cd47	ENSMUSG00000055447	Cd47	3.43841e-09	2.21619e-07	1.13222	1.13222	422.061	372.773
Lrba	ENSMUSG00000028080	Lrba	4.47322e-07	1.99654e-05	1.20859	1.20859	185.328	153.342
Fam49b	ENSMUSG00000022378	.	4.85323e-12	4.24527e-10	1.17208	1.17208	492.468	420.165
Nfkb1	ENSMUSG00000028163	Nfkb1	5.2028e-13	5.07182e-11	1.22876	1.22876	283.42	230.656
Il31ra	ENSMUSG00000050377	Il31ra	0.00279606	0.0601384	0.923979	-1.08228	1456.85	1576.72
Malat1	ENSMUSG00000092341	Malat1	2.24017e-54	4.38938e-50	1.29918	1.29918	21515	16560.5
Gmfg	ENSMUSG00000060791	Gmfg	4.49383e-05	0.00143407	0.878252	-1.13863	185.123	210.786
Ptprj	ENSMUSG00000025314	Ptprj	3.19234e-07	1.46833e-05	1.16458	1.16458	475.507	408.309
Mcl1	ENSMUSG00000038612	Mcl1	0.000851709	0.021232	0.933636	-1.07108	425.306	455.537
Kynu	ENSMUSG00000026866	Kynu	0.000211455	0.00597872	1.16956	1.16956	140.626	120.238
Eif4ebp2	ENSMUSG00000020091	Eif4ebp2	0.00967398	0.173901	0.921774	-1.08487	127.053	137.835
Arhgap15	ENSMUSG00000049744	Arhgap15	3.4549e-44	2.25651e-40	1.40436	1.40436	1625.96	1157.79
Dnajb1	ENSMUSG00000005483	Dnajb1	0.00110608	0.0266247	0.859321	-1.16371	86.7284	100.927
Cmip	ENSMUSG00000034390	Cmip	2.20822e-05	0.000752484	1.15937	1.15937	178.934	154.337
Rpl41	ENSMUSG00000093674	Rpl41	9.14095e-28	5.77767e-25	0.840075	-1.19037	4310.33	5130.88
Baz2b	ENSMUSG00000026987	Baz2b	3.74745e-15	4.67691e-13	1.23424	1.23424	426.8	345.8
Ddx6	ENSMUSG00000032097	Ddx6	9.58079e-12	7.9545e-10	1.18639	1.18639	310.938	262.088
Med13	ENSMUSG00000034297	Med13	3.69709e-06	0.000145172	1.16789	1.16789	199.202	170.565
Prdx1	ENSMUSG00000028691	Prdx1	0.0284093	0.427535	0.944695	-1.05854	277.255	293.486
Ucp2	ENSMUSG00000033685	Ucp2	3.34862e-08	1.81753e-06	0.883656	-1.13166	369.79	418.478
Uqcrh	ENSMUSG00000063882	Uqcrh	2.69348e-23	7.76119e-21	0.813864	-1.22871	483.935	594.613
Eef1b2	ENSMUSG00000025967	Eef1b2	4.38458e-10	3.04651e-08	0.886817	-1.12763	650.064	733.031
Plcg2	ENSMUSG00000034330	Plcg2	7.33789e-06	0.000270261	1.1327	1.1327	282.405	249.32
Zcchc7	ENSMUSG00000035649	Zcchc7	2.64947e-18	4.76273e-16	1.30488	1.30488	505.844	387.656
Micos10	ENSMUSG00000050608	Micos10	0.000561379	0.0145691	0.887077	-1.1273	114.189	128.725
Slc4a7	ENSMUSG00000021733	Slc4a7	3.01329e-05	0.000993979	1.17703	1.17703	141.36	120.099
2023-03-01	ENSMUSG00000036469	.	1.07927e-28	8.13356e-26	1.40495	1.40495	604.747	430.439
Aff1	ENSMUSG00000029313	Aff1	0.000109427	0.00327846	1.14356	1.14356	184.527	161.362
Lnpep	ENSMUSG00000023845	Lnpep	0.0180598	0.294886	1.07109	1.07109	270.162	252.23
Sdhb	ENSMUSG00000009863	Sdhb	0.00018597	0.00534296	0.884935	-1.13003	118.712	134.147
Tomm6	ENSMUSG00000033475	Tomm6	0.000191406	0.00546708	0.905718	-1.1041	236.176	260.761
Tma7	ENSMUSG00000091537	Tma7	2.33342e-08	1.3026e-06	0.864545	-1.15668	221.957	256.732
P2ry10	ENSMUSG00000050921	P2ry10	0.00787515	0.147117	1.1098	1.1098	113.092	101.904
Rftn1	ENSMUSG00000039316	Rftn1	0.00960891	0.173049	1.09267	1.09267	262.553	240.285
Hmgn2	ENSMUSG00000003038	Hmgn2	0.049054	0.672613	0.930924	-1.0742	123.169	132.309
Aff4	ENSMUSG00000049470	Aff4	1.29242e-06	5.51714e-05	1.17444	1.17444	202.034	172.026
Ms4a1	ENSMUSG00000024673	Ms4a1	2.93656e-05	0.000973585	0.936258	-1.06808	873.07	932.51
Senp6	ENSMUSG00000034252	Senp6	0.00380736	0.0786106	1.08385	1.08385	215.822	199.125
Lrch1	ENSMUSG00000068015	Lrch1	1.21596e-05	0.000433979	1.14153	1.14153	287.446	251.808
Cmah	ENSMUSG00000016756	Cmah	0.000850609	0.0212316	1.12016	1.12016	220.147	196.531
C1galt1	ENSMUSG00000042460	C1galt1	0.0140638	0.241301	1.09354	1.09354	136.58	124.897
Eef1d	ENSMUSG00000055762	Eef1d	1.5194e-07	7.40573e-06	0.883422	-1.13196	284.236	321.745
Mif4gd	ENSMUSG00000020743	Mif4gd	0.0248371	0.383138	0.941514	-1.06212	226.163	240.212
Cox5a	ENSMUSG00000000088	Cox5a	3.1484e-05	0.00102988	0.894646	-1.11776	217.577	243.199
Rtn4	ENSMUSG00000020458	Rtn4	0.0184859	0.301091	1.08655	1.08655	123.966	114.092
Cst3	ENSMUSG00000027447	Cst3	0.00273699	0.0590624	0.905906	-1.10387	157.63	174.003
Tcea1	ENSMUSG00000033813	Tcea1	0.00220072	0.0483961	0.923271	-1.08311	216.954	234.985
Hmgb2	ENSMUSG00000054717	Hmgb2	0.0012351	0.0291926	0.882324	-1.13337	134.386	152.309
Irf4	ENSMUSG00000021356	Irf4	0.00874522	0.160294	1.13298	1.13298	109.288	96.4613
Sfpq	ENSMUSG00000028820	Sfpq	0.0272703	0.413571	1.06108	1.06108	225.869	212.866
Sp100	ENSMUSG00000026222	Sp100	2.91043e-10	2.03667e-08	1.14338	1.14338	513.463	449.074
Serpinb1a	ENSMUSG00000044734	Serpinb1a	0.0226854	0.355405	0.929583	-1.07575	210.621	226.576
Plek	ENSMUSG00000020120	Plek	2.36491e-06	9.59379e-05	1.1701	1.1701	181.172	154.834
Tnfrsf13b	ENSMUSG00000010142	Tnfrsf13b	0.0129526	0.2242	0.929876	-1.07541	178.209	191.648
Ikzf3	ENSMUSG00000018168	Ikzf3	7.91355e-07	3.43049e-05	1.10744	1.10744	761.752	687.852
Med13l	ENSMUSG00000018076	Med13l	0.0031086	0.0658486	1.11885	1.11885	124.607	111.371
Ltb	ENSMUSG00000024399	Ltb	4.17512e-17	6.24483e-15	0.840828	-1.1893	598.7	712.037
Sem1	ENSMUSG00000042541	Sem1	2.33745e-10	1.67153e-08	0.865881	-1.15489	305.874	353.251
Cnot4	ENSMUSG00000038784	Cnot4	1.90506e-10	1.38844e-08	1.22781	1.22781	197.361	160.742
Tomm22	ENSMUSG00000022427	Tomm22	1.27384e-05	0.000451481	0.875025	-1.14282	132.036	150.893
Cib1	ENSMUSG00000030538	Cib1	0.00148449	0.0343007	0.900696	-1.11025	142.36	158.055
Elf2	ENSMUSG00000037174	Elf2	3.57614e-05	0.00115629	1.13918	1.13918	164.229	144.164
Top1	ENSMUSG00000070544	Top1	0.0365724	0.526912	0.937693	-1.06645	182.875	195.027
Cox4i1	ENSMUSG00000031818	Cox4i1	1.56188e-15	2.02672e-13	0.856215	-1.16793	493.489	576.362
Pip4k2a	ENSMUSG00000026737	Pip4k2a	7.69789e-06	0.00028088	1.15632	1.15632	299.812	259.282
Mrps21	ENSMUSG00000054312	Mrps21	2.98818e-05	0.00098736	0.88646	-1.12808	159.846	180.319
Gm20559	ENSMUSG00000106734	Gm20559	0.00177079	0.0402049	1.12142	1.12142	148.684	132.585
Gnai2	ENSMUSG00000032562	Gnai2	0.014317	0.244362	0.950938	-1.05159	417.595	439.14
Stt3b	ENSMUSG00000032437	Stt3b	2.60372e-11	2.09087e-09	1.24805	1.24805	210.874	168.962
Sesn1	ENSMUSG00000038332	Sesn1	1.7915e-18	3.28786e-16	1.27919	1.27919	305.984	239.201
Rpl23a	ENSMUSG00000058546	Rpl23a	7.76087e-09	4.73728e-07	0.878704	-1.13804	367.069	417.739
Pold4	ENSMUSG00000024854	Pold4	6.07517e-17	8.95014e-15	0.795805	-1.25659	237.18	298.037
Maml3	ENSMUSG00000061143	Maml3	4.2925e-06	0.000166549	1.28437	1.28437	124.593	97.0077
Plac8	ENSMUSG00000029322	Plac8	2.57211e-05	0.000865944	0.876631	-1.14073	331.762	378.452
Spi1	ENSMUSG00000002111	Spi1	0.0475429	0.656487	0.936627	-1.06766	118.366	126.374
Kdm7a	ENSMUSG00000042599	Kdm7a	5.31187e-09	3.32526e-07	1.22584	1.22584	165.364	134.898
Exoc4	ENSMUSG00000029763	Exoc4	6.45304e-20	1.34512e-17	1.36337	1.36337	287.882	211.155
Kras	ENSMUSG00000030265	Kras	0.0146534	0.249235	1.08461	1.08461	145.746	134.377
Mark3	ENSMUSG00000007411	Mark3	0.0103683	0.185192	1.09775	1.09775	117.053	106.63
Bri3	ENSMUSG00000047843	Bri3	0.00797645	0.148707	0.904025	-1.10616	108.149	119.63
Ubr3	ENSMUSG00000044308	Ubr3	0.000160998	0.00470134	1.15858	1.15858	118.924	102.646
Myo5a	ENSMUSG00000034593	Myo5a	0.00173229	0.0394729	1.12292	1.12292	148.681	132.406
Atp5h	ENSMUSG00000034566	Atp5h	1.61992e-06	6.73899e-05	0.886618	-1.12788	265.964	299.976
Plekha2	ENSMUSG00000031557	Plekha2	0.00741733	0.139477	1.0794	1.0794	215.578	199.72
Smarca5	ENSMUSG00000031715	Smarca5	0.00612573	0.118522	1.08103	1.08103	201.354	186.262
Psme1	ENSMUSG00000022216	Psme1	0.0011906	0.0283802	0.930345	-1.07487	381.482	410.044
Arf5	ENSMUSG00000020440	Arf5	2.34433e-05	0.000794721	0.885476	-1.12934	150.909	170.427
Aldoa	ENSMUSG00000030695,ENSMUSG00000114515	Aldoa	0.00330172	0.0694886	0.922794	-1.08367	159.956	173.339
Cox6b1	ENSMUSG00000036751	Cox6b1	1.00027e-07	5.02546e-06	0.869274	-1.15039	225.576	259.499
Cd79a	ENSMUSG00000003379	Cd79a	4.62902e-36	9.07011e-33	0.844299	-1.18441	2505.8	2967.9
Scml4	ENSMUSG00000044770	Scml4	7.31726e-05	0.00228303	1.17262	1.17262	138.7	118.282
Tnrc6b	ENSMUSG00000047888	Tnrc6b	2.75939e-08	1.52733e-06	1.16862	1.16862	324.925	278.042
Tmem258	ENSMUSG00000036372	Tmem258	4.81214e-05	0.00153067	0.885925	-1.12876	158.994	179.466
Mef2a	ENSMUSG00000030557	Mef2a	1.51421e-06	6.36683e-05	1.19871	1.19871	148.213	123.644
Gpd2	ENSMUSG00000026827	Gpd2	0.0249463	0.383972	1.10815	1.10815	97.9518	88.3924
Arhgef3	ENSMUSG00000021895	Arhgef3	0.000830963	0.0208475	1.13028	1.13028	158.915	140.598
Gm26917	ENSMUSG00000097971	.	1.10456e-19	2.27819e-17	1.4389	1.4389	927.562	644.631
Lamtor2	ENSMUSG00000028062	Lamtor2	0.0176014	0.288845	0.933487	-1.07125	162.829	174.431
Cox7c	ENSMUSG00000017778	Cox7c	1.86059e-13	1.92891e-11	0.853345	-1.17186	366.522	429.513
Ftl1	ENSMUSG00000050708	Ftl1	3.58321e-12	3.1484e-10	0.880558	-1.13564	912.54	1036.32
Mrtfa	ENSMUSG00000042292	Mrtfa	0.0273762	0.41413	1.08612	1.08612	128.413	118.23
Ablim1	ENSMUSG00000025085	Ablim1	4.33976e-07	1.94584e-05	1.12089	1.12089	480.539	428.712
Slc12a6	ENSMUSG00000027130	Slc12a6	5.04574e-10	3.48121e-08	1.19244	1.19244	401.295	336.532
Trim14	ENSMUSG00000039853	Trim14	0.00152629	0.0351836	1.13638	1.13638	119.997	105.596
Trip12	ENSMUSG00000026219	Trip12	2.5328e-06	0.000102325	1.17251	1.17251	183.418	156.432
Wdfy4	ENSMUSG00000051506	Wdfy4	6.27995e-12	5.32681e-10	1.20066	1.20066	417.116	347.406
Gpatch8	ENSMUSG00000034621	Gpatch8	0.000182776	0.00526663	1.13616	1.13616	149.88	131.918
Tpd52	ENSMUSG00000027506	Tpd52	0.00936167	0.169218	1.089	1.089	137.389	126.161
Inpp5d	ENSMUSG00000026288	Inpp5d	8.84383e-17	1.2836e-14	1.23694	1.23694	447.363	361.668
Rpl37	ENSMUSG00000041841	Rpl37	3.72797e-29	3.32027e-26	0.825887	-1.21082	3604.36	4364.23
Apbb1ip	ENSMUSG00000026786	Apbb1ip	7.38493e-13	7.05855e-11	1.19714	1.19714	356.291	297.619
Bmp2k	ENSMUSG00000034663	Bmp2k	2.1494e-15	2.73476e-13	1.27098	1.27098	442.189	347.912
Sptbn1	ENSMUSG00000020315	Sptbn1	5.11315e-06	0.000194916	1.15471	1.15471	180.319	156.159
Foxo3	ENSMUSG00000048756	Foxo3	0.0245756	0.379759	1.1174	1.1174	100.154	89.6314
Ndufb1-ps	ENSMUSG00000113902	.	2.07983e-19	4.15839e-17	0.788444	-1.26832	221.756	281.258
Mif	ENSMUSG00000033307	Mif	0.000465518	0.0123932	0.892601	-1.12032	204.336	228.922
Dhx15	ENSMUSG00000029169	Dhx15	0.0433685	0.60654	1.05595	1.05595	211.628	200.414
G3bp1	ENSMUSG00000018583	G3bp1	0.0108721	0.192437	1.08104	1.08104	175.35	162.205
Fcrla	ENSMUSG00000038421	Fcrla	2.84765e-06	0.000113788	0.878825	-1.13788	223.263	254.047
Rps17	ENSMUSG00000061787	Rps17	1.25516e-07	6.2105e-06	0.888965	-1.1249	404.983	455.567
Anp32b	ENSMUSG00000028333	Anp32b	0.0142193	0.242984	0.935987	-1.06839	253.203	270.52
Psap	ENSMUSG00000004207	Psap	0.0107444	0.190867	0.940586	-1.06317	366.619	389.777
Srsf2	ENSMUSG00000034120	Srsf2	0.000416046	0.0112132	1.11645	1.11645	160.849	144.072
Gng2	ENSMUSG00000043004	Gng2	0.00103928	0.0252025	1.11528	1.11528	168.397	150.991
Chd3	ENSMUSG00000018474	Chd3	0.0408808	0.577103	0.932353	-1.07256	132.794	142.429
Rpl39	ENSMUSG00000079641	Rpl39	6.60261e-29	5.28505e-26	0.82247	-1.21585	2692.53	3273.71
Swap70	ENSMUSG00000031015	Swap70	0.000579479	0.0149991	1.08424	1.08424	439.19	405.069
Tra2a	ENSMUSG00000029817	Tra2a	2.5443e-05	0.000858056	1.13157	1.13157	208.969	184.671
H2-D1	ENSMUSG00000073411	H2-D1	1.36132e-13	1.44966e-11	0.910058	-1.09883	1642.38	1804.7
Zfp644	ENSMUSG00000049606	Zfp644	0.00349832	0.0731547	1.10633	1.10633	139.347	125.955
Tlk2	ENSMUSG00000020694	Tlk2	0.00499319	0.0998332	1.12817	1.12817	106.463	94.3681
Rab2a	ENSMUSG00000047187	Rab2a	0.000306294	0.00844096	1.1105	1.1105	191.872	172.78
Ubap2l	ENSMUSG00000042520	Ubap2l	0.00288818	0.0619836	1.09176	1.09176	184.252	168.767
Btla	ENSMUSG00000052013	Btla	5.19595e-31	5.35839e-28	1.35787	1.35787	586.165	431.68
Serp1	ENSMUSG00000027808	Serp1	0.00845394	0.155829	0.947014	-1.05595	396.041	418.2
Erbin	ENSMUSG00000021709	Erbin	2.85354e-05	0.000950888	1.15645	1.15645	146.619	126.783
Limd2	ENSMUSG00000040699	Limd2	3.83744e-07	1.73441e-05	0.897129	-1.11467	414.269	461.772
Samd9l	ENSMUSG00000047735	Samd9l	3.25988e-05	0.00106103	1.15812	1.15812	139.065	120.078
Tnfaip8	ENSMUSG00000062210	Tnfaip8	0.0398527	0.565656	1.06195	1.06195	284.933	268.312
Man1a	ENSMUSG00000003746	Man1a	1.55113e-34	2.76298e-31	1.34573	1.34573	1027.67	763.649
Eif2ak3	ENSMUSG00000031668	Eif2ak3	0.00832193	0.153573	1.11705	1.11705	114.086	102.132
Ddx5	ENSMUSG00000020719	Ddx5	0.000124108	0.00369009	1.06235	1.06235	763.76	718.932
Ppp3cc	ENSMUSG00000022092	Ppp3cc	0.0202102	0.324324	1.07848	1.07848	195.775	181.529
Camkmt	ENSMUSG00000071037	Camkmt	0.0207469	0.331577	1.12998	1.12998	154.01	136.294
Mapkap1	ENSMUSG00000038696	Mapkap1	2.81687e-05	0.00094027	1.17088	1.17088	134.949	115.254
Chd4	ENSMUSG00000063870	Chd4	0.0442914	0.617684	1.05714	1.05714	219.095	207.253
Ptma	ENSMUSG00000026238	Ptma	0.00595082	0.11556	0.956902	-1.04504	1682.52	1758.3
St3gal1	ENSMUSG00000013846	St3gal1	1.67006e-10	1.23483e-08	1.24511	1.24511	185.662	149.113
Tmsb10	ENSMUSG00000079523	Tmsb10	1.54813e-42	7.58351e-39	0.78969	-1.26632	3510.02	4444.81
Rpl28	ENSMUSG00000030432	Rpl28	7.07063e-19	1.34507e-16	0.861499	-1.16077	1813.45	2104.99
Ptpn18	ENSMUSG00000026126	Ptpn18	1.73561e-12	1.60413e-10	0.842807	-1.18651	294.974	349.99
Arglu1	ENSMUSG00000040459	Arglu1	0.000477114	0.0126674	1.09948	1.09948	228.529	207.851
Gls	ENSMUSG00000026103	Gls	3.13834e-08	1.71289e-06	1.20545	1.20545	158.315	131.333
Plcl2	ENSMUSG00000038910	Plcl2	4.20215e-08	2.21932e-06	1.21638	1.21638	207.79	170.826
Phf21a	ENSMUSG00000058318	Phf21a	1.07993e-08	6.43194e-07	1.20244	1.20244	261.775	217.703
Vti1a	ENSMUSG00000024983	Vti1a	2.00253e-08	1.13732e-06	1.23152	1.23152	197.66	160.501
Psma7	ENSMUSG00000027566	Psma7	0.0124175	0.216439	0.92745	-1.07823	164.326	177.18
Npc2	ENSMUSG00000021242	Npc2	0.0435111	0.608101	0.929214	-1.07618	112.032	120.567
Wdr44	ENSMUSG00000036769	Wdr44	0.0173395	0.285056	1.10741	1.10741	108.555	98.0263
Ywhaz	ENSMUSG00000022285	Ywhaz	0.0168547	0.278458	0.955705	-1.04635	470.616	492.429
Gm43388	ENSMUSG00000104927	Gm43388	1.01936e-06	4.38975e-05	1.2152	1.2152	163.878	134.857
Rcsd1	ENSMUSG00000040723	Rcsd1	1.96796e-08	1.12094e-06	1.17823	1.17823	317.107	269.139
Stat4	ENSMUSG00000062939	Stat4	5.69483e-18	9.78812e-16	1.38093	1.38093	224.209	162.361
Ankhd1	ENSMUSG00000024483	Ankhd1	0.000892164	0.022072	1.11204	1.11204	185.099	166.45
Polr1d	ENSMUSG00000029642	Polr1d	3.04771e-06	0.00012064	0.882602	-1.13301	200.073	226.685
Psma2	ENSMUSG00000015671	Psma2	0.00524032	0.103926	0.9203	-1.0866	148.664	161.538
Ddx42	ENSMUSG00000020705	Ddx42	0.022743	0.355647	1.08408	1.08408	114.638	105.747
Hnrnph2	ENSMUSG00000045427	Hnrnph2	0.0136156	0.234433	1.09372	1.09372	112.409	102.777
Acbd5	ENSMUSG00000026781	Acbd5	0.00709823	0.13425	1.12411	1.12411	105.172	93.5597
2023-03-07	ENSMUSG00000026977	.	0.0157601	0.263934	1.10361	1.10361	107.123	97.0661
Ccny	ENSMUSG00000024286	Ccny	7.0016e-06	0.000258848	1.18074	1.18074	133.429	113.004
Zmynd11	ENSMUSG00000021156	Zmynd11	0.00140127	0.0326863	1.11342	1.11342	162.171	145.651
Prdx2	ENSMUSG00000005161	Prdx2	0.000162928	0.0047506	0.872205	-1.14652	111.465	127.796
Ppp4r3a	ENSMUSG00000041846	Ppp4r3a	0.00307851	0.0654234	1.10636	1.10636	131.88	119.202
Zc3hav1	ENSMUSG00000029826	Zc3hav1	2.49507e-05	0.000842903	1.15168	1.15168	154.466	134.121
Zfp407	ENSMUSG00000048410	Zfp407	1.13103e-10	8.54862e-09	1.29966	1.29966	156.331	120.285
Cul3	ENSMUSG00000004364	Cul3	3.84165e-07	1.73441e-05	1.17852	1.17852	168.024	142.572
1810037I17Rik	ENSMUSG00000054091	1810037I17Rik	0.0184351	0.300513	0.926772	-1.07901	122.938	132.652
Ago2	ENSMUSG00000036698	Ago2	0.000133276	0.00392693	1.13885	1.13885	144.461	126.848
Snrnp70	ENSMUSG00000063511	Snrnp70	2.42206e-06	9.80535e-05	1.12961	1.12961	244.719	216.639
Dbnl	ENSMUSG00000020476	Dbnl	0.00467529	0.0940529	0.914098	-1.09398	132.409	144.852
Lyn	ENSMUSG00000042228	Lyn	1.30644e-25	5.81783e-23	1.23431	1.23431	1044.78	846.448
Fkbp5	ENSMUSG00000024222	Fkbp5	2.41164e-08	1.34243e-06	1.31504	1.31504	123.08	93.5946
Tle5	ENSMUSG00000054452	Tle5	6.52065e-06	0.000243363	0.888507	-1.12548	205.626	231.429
Sf1	ENSMUSG00000024949	Sf1	0.0429752	0.601898	1.05881	1.05881	182.415	172.283
Naca	ENSMUSG00000061315	Naca	7.49073e-15	9.06008e-13	0.875365	-1.14238	820.735	937.592
Gimap8	ENSMUSG00000064262	Gimap8	0.000785687	0.0197876	1.11058	1.11058	165.1	148.661
Ctsh	ENSMUSG00000032359	Ctsh	0.00955459	0.172229	0.934751	-1.0698	219.851	235.197
Lbr	ENSMUSG00000004880	Lbr	0.0227093	0.355405	1.08147	1.08147	126.307	116.792
Selenof	ENSMUSG00000037072	Selenof	0.0492454	0.674294	0.944691	-1.05855	151.861	160.752
Kmt5b	ENSMUSG00000045098	Kmt5b	0.00051961	0.0136113	1.13729	1.13729	123.128	108.264
Trim12a	ENSMUSG00000066258	Trim12a	0.000454588	0.0121544	1.12076	1.12076	156.632	139.754
Zfp831	ENSMUSG00000050600	Zfp831	0.0398679	0.565656	1.08516	1.08516	119.17	109.818
Kat6a	ENSMUSG00000031540	Kat6a	8.50669e-05	0.00260031	1.14555	1.14555	143.01	124.839
Scand1	ENSMUSG00000046229	Scand1	5.99871e-06	0.000225602	0.884715	-1.13031	212.942	240.69
Celf2	ENSMUSG00000002107	Celf2	1.38362e-07	6.77765e-06	1.14759	1.14759	425.02	370.357
Zfp53	ENSMUSG00000057409	Zfp53	0.00660085	0.126306	1.14758	1.14758	104.739	91.2698
Diaph1	ENSMUSG00000024456	Diaph1	7.58016e-06	0.000278138	1.1556	1.1556	159.447	137.977
Tmsb4x	ENSMUSG00000049775	Tmsb4x	3.51153e-33	4.58699e-30	0.826894	-1.20934	2674.02	3233.81
Rfx7	ENSMUSG00000037674	Rfx7	5.46709e-06	0.0002072	1.16778	1.16778	186.649	159.833
Abi1	ENSMUSG00000058835	Abi1	4.40126e-06	0.000170095	1.16362	1.16362	184.624	158.663
Rbm25	ENSMUSG00000010608	Rbm25	5.47806e-10	3.75305e-08	1.17526	1.17526	276.159	234.976
Pml	ENSMUSG00000036986	Pml	0.00252873	0.0548705	1.10841	1.10841	159.039	143.484
Selenok	ENSMUSG00000042682	Selenok	0.00345589	0.0724221	0.916013	-1.09169	148.807	162.45
Rab21	ENSMUSG00000020132	Rab21	0.0306774	0.454156	1.06138	1.06138	205.782	193.881
Ptp4a3	ENSMUSG00000059895	Ptp4a3	0.00305769	0.0650514	0.919644	-1.08738	187.046	203.39
Nxpe3	ENSMUSG00000075033	Nxpe3	0.00262673	0.056871	1.12189	1.12189	122.136	108.866
Brd1	ENSMUSG00000022387	Brd1	0.028825	0.432794	1.07562	1.07562	131.406	122.167
Rp9	ENSMUSG00000032239	Rp9	1.37366e-05	0.000483223	0.884467	-1.13063	168.371	190.365
Mrpl52	ENSMUSG00000010406	Mrpl52	1.06552e-07	5.32597e-06	0.855263	-1.16923	204.48	239.084
Rack1	ENSMUSG00000020372	Rack1	6.05623e-05	0.00191088	0.931719	-1.07328	771.108	827.618
Atp5g3	ENSMUSG00000018770	Atp5g3	0.00709512	0.13425	0.940408	-1.06337	356.622	379.22
Rps11	ENSMUSG00000003429	Rps11	6.01295e-29	5.12251e-26	0.823938	-1.21368	2199.7	2669.74
Ppp1r12a	ENSMUSG00000019907	Ppp1r12a	2.34702e-07	1.10813e-05	1.15682	1.15682	262.641	227.037
Elob	ENSMUSG00000055839	Elob	3.4055e-07	1.55905e-05	0.881167	-1.13486	281.152	319.067
Rps12	ENSMUSG00000061983	Rps12	1.84409e-13	1.9259e-11	0.875461	-1.14226	1578.9	1803.5
Chd7	ENSMUSG00000041235	Chd7	1.1387e-06	4.8822e-05	1.17903	1.17903	177.643	150.669
Kdm4c	ENSMUSG00000028397	Kdm4c	0.0211653	0.335799	1.10274	1.10274	108.527	98.4162
Cox14	ENSMUSG00000023020	Cox14	0.000256789	0.00714706	0.876863	-1.14043	106.376	121.315
Cdk8	ENSMUSG00000029635	Cdk8	1.58547e-06	6.62383e-05	0.906037	-1.10371	4732.94	5223.78
Kmt2e	ENSMUSG00000029004	Kmt2e	1.85198e-07	8.8723e-06	1.1307	1.1307	373.397	330.234
Rps27	ENSMUSG00000090733	Rps27	1.5912e-28	1.1135e-25	0.822954	-1.21514	2744.88	3335.4
Znrf2	ENSMUSG00000058446	Znrf2	0.00314327	0.0665111	1.11577	1.11577	119.995	107.545
Asap1	ENSMUSG00000022377	Asap1	0.0215652	0.340764	1.0851	1.0851	168.582	155.361
Rabac1	ENSMUSG00000003380	Rabac1	0.0267757	0.407332	0.933395	-1.07136	162.316	173.898
Maml2	ENSMUSG00000031925	Maml2	1.75777e-07	8.46237e-06	1.2093	1.2093	546.749	452.121
Itpr1	ENSMUSG00000030102	Itpr1	7.93961e-05	0.00244221	1.14134	1.14134	247.891	217.193
Fhit	ENSMUSG00000060579	Fhit	0.0192217	0.310495	1.16427	1.16427	113.246	97.2675
Etv6	ENSMUSG00000030199	Etv6	0.000225183	0.00632126	1.17823	1.17823	145.41	123.414
Snrpd3	ENSMUSG00000020180	Snrpd3	0.00248323	0.0540028	0.910309	-1.09853	155.281	170.58
Ankrd17	ENSMUSG00000055204	Ankrd17	5.61789e-12	4.78595e-10	1.26139	1.26139	211.008	167.281
Phf14	ENSMUSG00000029629	Phf14	0.000182319	0.0052612	1.13395	1.13395	154.913	136.614
Hnrnph1	ENSMUSG00000007850	Hnrnph1	0.00192875	0.0431908	1.09929	1.09929	154.494	140.54
Abhd17a	ENSMUSG00000003346	Abhd17a	0.00169703	0.0388	0.904339	-1.10578	129.613	143.324
Cltc	ENSMUSG00000047126	Cltc	0.0291106	0.436576	1.06842	1.06842	163.573	153.098
Gpsm3	ENSMUSG00000034786	Gpsm3	0.00878658	0.160901	0.916882	-1.09065	121.377	132.38
Smyd3	ENSMUSG00000055067	Smyd3	2.51975e-16	3.50156e-14	1.37283	1.37283	230.303	167.758
Snu13	ENSMUSG00000063480	Snu13	0.00103439	0.0251151	0.899308	-1.11197	132.057	146.843
H2-Ab1	ENSMUSG00000073421	H2-Ab1	0.000145527	0.00427504	0.948923	-1.05383	1631.51	1719.33
Arhgap17	ENSMUSG00000030766	Arhgap17	0.00039762	0.010761	1.10479	1.10479	288.757	261.367
St6galnac3	ENSMUSG00000052544	St6galnac3	2.05091e-05	0.000701317	1.21567	1.21567	267.282	219.864
H2-DMa	ENSMUSG00000037649	H2-DMa	0.00018976	0.00542797	0.915817	-1.09192	297.265	324.59
Rpl22	ENSMUSG00000028936	Rpl22	2.4316e-24	8.508e-22	0.844041	-1.18478	1560.3	1848.6
AY036118	ENSMUSG00000105361	AY036118	0.00285935	0.0614321	0.926021	-1.07989	1008.16	1088.7
Rapgef1	ENSMUSG00000039844	Rapgef1	0.00165472	0.0379656	1.10362	1.10362	193.18	175.042
Immp2l	ENSMUSG00000056899	Immp2l	1.02183e-17	1.71125e-15	1.33745	1.33745	828.885	619.749
Map3k1	ENSMUSG00000021754	Map3k1	1.38184e-08	8.05828e-07	1.1874	1.1874	240.711	202.721
Ppp1cc	ENSMUSG00000004455	Ppp1cc	0.0161725	0.269689	0.936464	-1.06785	190.018	202.91
Zzz3	ENSMUSG00000039068	Zzz3	0.0189507	0.307384	1.10027	1.10027	116.99	106.328
Rnf144a	ENSMUSG00000020642	Rnf144a	0.0120636	0.211615	1.11368	1.11368	106.163	95.3259
Lars2	ENSMUSG00000035202	Lars2	0.00655815	0.125857	0.933458	-1.07128	2197.71	2354.37
Mrpl43	ENSMUSG00000025208	Mrpl43	0.000951866	0.023372	0.890491	-1.12298	105.703	118.702
Smad4	ENSMUSG00000024515	Smad4	0.000186265	0.0053436	1.16464	1.16464	112.022	96.186
Cnr2	ENSMUSG00000062585	Cnr2	0.00810987	0.150478	1.10439	1.10439	127.27	115.239
Ptprcap	ENSMUSG00000045826	Ptprcap	9.62004e-15	1.14936e-12	0.84791	-1.17937	406.758	479.718
Pnrc2	ENSMUSG00000028675	Pnrc2	0.00377538	0.078115	0.890336	-1.12317	95.3554	107.1
Gm15564	ENSMUSG00000086324	Gm15564	0.00458114	0.0923924	0.890001	-1.12359	198.16	222.652
Rplp0	ENSMUSG00000067274	Rplp0	6.97995e-09	4.34175e-07	0.904608	-1.10545	2041.39	2256.66
Ubn2	ENSMUSG00000038538	Ubn2	0.000102497	0.00308974	1.14543	1.14543	150.437	131.337
Ppp2r5a	ENSMUSG00000026626	Ppp2r5a	0.0125942	0.218822	1.07926	1.07926	170.455	157.936
Ctps2	ENSMUSG00000031360	Ctps2	0.0105825	0.188161	1.13008	1.13008	99.6295	88.1613
Lonp2	ENSMUSG00000047866	Lonp2	0.00232557	0.0509131	1.11849	1.11849	121.152	108.317
Xylt1	ENSMUSG00000030657	Xylt1	4.98927e-24	1.62933e-21	1.4445	1.4445	289.655	200.523
Eif1	ENSMUSG00000035530	Eif1	4.51297e-21	1.0527e-18	0.8732	-1.14521	1238.82	1418.72
Sh3bp5	ENSMUSG00000021892	Sh3bp5	2.555e-07	1.19767e-05	1.16124	1.16124	269.209	231.829
Tubb5	ENSMUSG00000001525	Tubb5	0.000529336	0.0138291	0.901018	-1.10986	207.526	230.323
Tram1	ENSMUSG00000025935	Tram1	0.0318528	0.469619	0.935804	-1.0686	143.88	153.75
Heg1	ENSMUSG00000075254	Heg1	1.87045e-12	1.7126e-10	1.28221	1.28221	230.318	179.626
Atf7ip	ENSMUSG00000030213	Atf7ip	2.83938e-09	1.84221e-07	1.20701	1.20701	246.889	204.546
Rpp21	ENSMUSG00000024446	Rpp21	0.0468546	0.648354	0.927073	-1.07866	99.3433	107.158
Ndufb7	ENSMUSG00000033938	Ndufb7	7.77464e-05	0.00240577	0.881213	-1.1348	126.366	143.4
Atp8a1	ENSMUSG00000037685	Atp8a1	4.97776e-05	0.00158078	1.15179	1.15179	213.124	185.038
H2-Aa	ENSMUSG00000036594	H2-Aa	6.76021e-08	3.45847e-06	0.927847	-1.07776	4014.94	4327.16
Arhgap26	ENSMUSG00000036452	Arhgap26	4.44044e-15	5.47208e-13	1.28542	1.28542	336.533	261.808
Eif3k	ENSMUSG00000053565	Eif3k	5.12823e-09	3.23095e-07	0.871891	-1.14693	286.704	328.83
Gabarapl2	ENSMUSG00000031950	Gabarapl2	0.00122034	0.0289604	0.906644	-1.10297	146.62	161.717
Msi2	ENSMUSG00000069769	Msi2	1.07998e-08	6.43194e-07	1.20122	1.20122	282.427	235.118
Parp14	ENSMUSG00000034422	Parp14	0.00723938	0.136656	1.12692	1.12692	113.238	100.484
Slmap	ENSMUSG00000021870	Slmap	0.000106618	0.0032041	1.17254	1.17254	118.093	100.715
Dbi	ENSMUSG00000026385	Dbi	0.026073	0.398498	0.909835	-1.0991	100.318	110.26
Senp7	ENSMUSG00000052917	Senp7	0.0161486	0.269519	1.08593	1.08593	154.309	142.099
Picalm	ENSMUSG00000039361	Picalm	4.30061e-07	1.93271e-05	1.20149	1.20149	148.954	123.974
Parp4	ENSMUSG00000054509	Parp4	0.014028	0.240898	1.10139	1.10139	111.583	101.312
Rngtt	ENSMUSG00000028274	Rngtt	0.0088448	0.161364	1.12165	1.12165	105.997	94.5008
Atp5j	ENSMUSG00000022890	Atp5j	1.21729e-09	8.19642e-08	0.851985	-1.17373	213.81	250.955
Rpl17	ENSMUSG00000062328	Rpl17	1.50449e-14	1.73406e-12	0.883337	-1.13207	1654.14	1872.6
Gng10	ENSMUSG00000038607	Gng10	0.000782171	0.0197244	0.891473	-1.12174	122.534	137.451
Sgms1	ENSMUSG00000040451	Sgms1	1.60814e-19	3.24844e-17	1.37059	1.37059	274.89	200.563
Ms4a4c	ENSMUSG00000024675	Ms4a4c	2.81514e-07	1.30711e-05	1.18706	1.18706	223.386	188.184
Irak2	ENSMUSG00000060477	Irak2	4.61285e-08	2.42968e-06	1.20386	1.20386	161.686	134.307
Lmbrd1	ENSMUSG00000073725	Lmbrd1	3.69864e-18	6.52893e-16	1.29249	1.29249	277.982	215.074
Ankrd12	ENSMUSG00000034647	Ankrd12	0.00116813	0.0278801	1.10884	1.10884	195.889	176.662
Cdk13	ENSMUSG00000041297	Cdk13	0.00121268	0.0288365	1.09909	1.09909	245.075	222.981
Atf7	ENSMUSG00000099083	Atf7	1.61523e-07	7.81451e-06	1.20643	1.20643	151.038	125.194
E330020D12Rik	ENSMUSG00000073538	E330020D12Rik	0.0404674	0.572788	0.926445	-1.07939	147.189	158.875
Hnrnpd	ENSMUSG00000000568	Hnrnpd	0.00139042	0.0324719	1.08646	1.08646	238.921	219.909
Prelid1	ENSMUSG00000021486	Prelid1	0.0144798	0.246925	0.928352	-1.07718	147.051	158.4
Psme4	ENSMUSG00000040850	Psme4	0.0138634	0.23849	1.1098	1.1098	112.177	101.078
Ciita	ENSMUSG00000022504	Ciita	0.000164982	0.00480336	1.11991	1.11991	225.81	201.633
Xpr1	ENSMUSG00000026469	Xpr1	0.00731352	0.13779	1.12272	1.12272	112.135	99.8782
Wwox	ENSMUSG00000004637	Wwox	0.000252908	0.00704904	1.21776	1.21776	130.79	107.402
Eefsec	ENSMUSG00000033216	Eefsec	0.00680872	0.12965	1.126	1.126	109.502	97.2485
Sik3	ENSMUSG00000034135	Sik3	0.0121726	0.213038	1.10804	1.10804	130.889	118.127
Gpx1	ENSMUSG00000063856	Gpx1	1.13871e-10	8.54862e-09	0.866932	-1.15349	497.063	573.359
Atox1	ENSMUSG00000018585	Atox1	0.000774152	0.0195473	0.889757	-1.1239	119.265	134.042
Slain2	ENSMUSG00000036087	Slain2	0.0272663	0.413571	1.10293	1.10293	100.82	91.4109
Nsmce2	ENSMUSG00000059586	Nsmce2	0.000271869	0.00753465	1.15001	1.15001	134.827	117.24
Ppp1ca	ENSMUSG00000040385	Ppp1ca	0.000118776	0.00354231	0.910559	-1.09823	277.471	304.726
Uqcrfs1	ENSMUSG00000038462	Uqcrfs1	0.00106011	0.0256758	0.901612	-1.10912	130.503	144.744
Atp11c	ENSMUSG00000062949	Atp11c	0.0331756	0.48384	1.11495	1.11495	97.4323	87.3872
Rps27a	ENSMUSG00000020460	Rps27a	1.78616e-21	4.26806e-19	0.856408	-1.16767	3143.79	3670.9
Trim34a	ENSMUSG00000056144	Trim34a	0.00335743	0.0705691	1.11734	1.11734	123.028	110.108
Nf1	ENSMUSG00000020716	Nf1	0.0251	0.385733	1.13377	1.13377	92.4122	81.5085
Sp3	ENSMUSG00000027109	Sp3	0.00494329	0.0989364	1.11029	1.11029	122.864	110.66
Rpl27	ENSMUSG00000063316	Rpl27	7.95554e-18	1.35549e-15	0.862793	-1.15903	1260.47	1460.91
Igkv3-5	ENSMUSG00000095335	Igkv3-5	0.0392112	0.558361	0.844703	-1.18385	107.425	127.175
Psmb5	ENSMUSG00000022193	Psmb5	0.00102655	0.0249556	0.902152	-1.10846	136.557	151.368
Aak1	ENSMUSG00000057230	Aak1	0.00122602	0.0290479	1.15166	1.15166	113.951	98.9445
Chchd3	ENSMUSG00000053768	Chchd3	0.0004636	0.0123589	1.12007	1.12007	178.649	159.498
Nek7	ENSMUSG00000026393	Nek7	1.95598e-07	9.34766e-06	1.19269	1.19269	187.545	157.246
Glcci1	ENSMUSG00000029638	Glcci1	8.47834e-05	0.0025957	1.15194	1.15194	191.356	166.116
Gm42418	ENSMUSG00000098178	.	8.32602e-09	5.03519e-07	0.928959	-1.07647	33104.4	35636
Cox7a2	ENSMUSG00000032330	Cox7a2	0.00083981	0.0210156	0.906218	-1.10349	169.376	186.905
H2-Ob	ENSMUSG00000041538	H2-Ob	0.0161177	0.269234	0.951057	-1.05146	447.005	470.009
Tspo	ENSMUSG00000041736	Tspo	1.71909e-05	0.00059512	0.871305	-1.1477	131.788	151.254
Anapc13	ENSMUSG00000035048	Anapc13	0.0485451	0.667036	0.913343	-1.09488	87.7118	96.0338
Rfx3	ENSMUSG00000040929	Rfx3	0.0017186	0.0392473	1.17117	1.17117	110.45	94.3076
Ndufa3	ENSMUSG00000035674	Ndufa3	7.97276e-09	4.8515e-07	0.86606	-1.15465	263.096	303.785
Ap1s3	ENSMUSG00000054702	Ap1s3	0.00294258	0.0630819	1.13064	1.13064	118.326	104.654
Brwd1	ENSMUSG00000022914	Brwd1	0.00130653	0.0306222	1.10695	1.10695	205.155	185.333
Gm20513	ENSMUSG00000092415	Gm20513	0.000206324	0.00584207	1.18653	1.18653	103.334	87.0886
Ssh2	ENSMUSG00000037926	Ssh2	8.75315e-15	1.0522e-12	1.26266	1.26266	355.077	281.213
Trim30a	ENSMUSG00000030921	Trim30a	1.64238e-07	7.92632e-06	1.22123	1.22123	161.236	132.028
Celf1	ENSMUSG00000005506	Celf1	0.00128833	0.0302318	1.11742	1.11742	144.621	129.424
Gpr174	ENSMUSG00000073008	Gpr174	0.0121345	0.212668	1.10758	1.10758	120	108.344
Pum1	ENSMUSG00000028580	Pum1	0.00355072	0.0741713	1.10381	1.10381	145.163	131.511
Rras2	ENSMUSG00000055723	Rras2	0.00197381	0.0439987	1.1304	1.1304	136.106	120.406
Rpl14	ENSMUSG00000025794	Rpl14	7.3446e-11	5.64353e-09	0.898192	-1.11335	1097.64	1222.06
Siglecg	ENSMUSG00000030468	Siglecg	2.23278e-05	0.000759532	0.896974	-1.11486	244.453	272.531
Ugcg	ENSMUSG00000028381	Ugcg	0.00511966	0.101946	1.1124	1.1124	118.994	106.97
Ahcyl2	ENSMUSG00000029772	Ahcyl2	0.00573785	0.112653	1.151	1.151	118.971	103.363
Trappc4	ENSMUSG00000032112	Trappc4	0.0369141	0.530664	0.925328	-1.0807	101.206	109.373
Rps6ka5	ENSMUSG00000021180	Rps6ka5	0.0209504	0.333654	1.10458	1.10458	123.849	112.123
Ppp2r2a	ENSMUSG00000022052	Ppp2r2a	0.00599368	0.116277	1.11133	1.11133	113.538	102.164
Ahnak	ENSMUSG00000069833	Ahnak	0.0361498	0.521206	1.16276	1.16276	87.1773	74.9742
Atxn7	ENSMUSG00000021738	Atxn7	0.0174872	0.287213	1.10892	1.10892	106.032	95.617
Cxcr5	ENSMUSG00000047880	Cxcr5	0.0112541	0.198125	1.08123	1.08123	174.311	161.215
Retreg1	ENSMUSG00000022270	Retreg1	1.95618e-08	1.11748e-06	1.20558	1.20558	213.145	176.799
Psmd14	ENSMUSG00000026914	Psmd14	0.0162569	0.270636	1.09386	1.09386	116.87	106.842
Tsc22d3	ENSMUSG00000031431	Tsc22d3	2.19906e-14	2.49066e-12	1.26688	1.26688	308.62	243.605
Sltm	ENSMUSG00000032212	Sltm	0.00799695	0.148806	1.08935	1.08935	169.097	155.227
Atp5mpl	ENSMUSG00000021290	Atp5mpl	2.85416e-07	1.32209e-05	0.866486	-1.15409	203.686	235.072
Ccdc12	ENSMUSG00000019659	Ccdc12	0.0191959	0.310334	0.927684	-1.07795	122.937	132.52
Luc7l2	ENSMUSG00000029823	Luc7l2	6.8994e-08	3.52049e-06	1.14414	1.14414	370.427	323.759
Spcs1	ENSMUSG00000021917	Spcs1	0.00119955	0.0285588	0.89928	-1.112	131.305	146.011
H2-Q4	ENSMUSG00000035929	H2-Q4	0.00173251	0.0394729	0.911388	-1.09723	165.398	181.479
Trim59	ENSMUSG00000034317	Trim59	0.0320879	0.472729	0.910022	-1.09887	93.0148	102.212
Foxo1	ENSMUSG00000044167	Foxo1	1.28807e-08	7.57909e-07	1.18671	1.18671	260.04	219.126
Micos13	ENSMUSG00000049760	Micos13	0.0078762	0.147117	0.912634	-1.09573	120.187	131.692
Ndufa11	ENSMUSG00000002379	Ndufa11	1.14061e-05	0.000410074	0.865898	-1.15487	129.066	149.055
Zfp318	ENSMUSG00000015597	Zfp318	5.77777e-10	3.94459e-08	1.233	1.233	208.549	169.139
Mndal	ENSMUSG00000090272	Mndal	1.06251e-08	6.36664e-07	1.14892	1.14892	445.511	387.764
Ireb2	ENSMUSG00000032293	Ireb2	0.0211412	0.33569	1.12157	1.12157	95.0139	84.7151
Atp5md	ENSMUSG00000071528	Atp5md	1.00973e-06	4.35785e-05	0.86862	-1.15125	179.311	206.431
Ndufa2	ENSMUSG00000014294	Ndufa2	7.45805e-06	0.000274171	0.876656	-1.1407	169.402	193.237
Enox2	ENSMUSG00000031109	Enox2	0.0197664	0.317983	1.13111	1.13111	105.382	93.1663
Igkv6-17	ENSMUSG00000095794	Igkv6-17	0.00122085	0.0289604	0.825712	-1.21108	254.367	308.058
Col4a3bp	ENSMUSG00000021669	.	7.66393e-06	0.000280686	1.2103	1.2103	115.216	95.1956
Prrc2c	ENSMUSG00000040225	Prrc2c	0.000113253	0.0033879	1.098	1.098	325.878	296.793
Dock2	ENSMUSG00000020143	Dock2	6.80327e-25	2.61379e-22	1.28182	1.28182	1914.16	1493.32
Acap2	ENSMUSG00000049076	Acap2	0.0039701	0.0816267	1.09885	1.09885	154.76	140.838
Jarid2	ENSMUSG00000038518	Jarid2	0.01671	0.276301	1.07251	1.07251	238.833	222.686
Rpl18a	ENSMUSG00000045128	Rpl18a	2.29376e-24	8.32295e-22	0.846634	-1.18115	3892.84	4598.02
Rbms1	ENSMUSG00000026970	Rbms1	3.10671e-05	0.00101965	1.14519	1.14519	153.824	134.321
Reep5	ENSMUSG00000005873	Reep5	2.27581e-07	1.07711e-05	0.859122	-1.16398	172.829	201.169
Cct4	ENSMUSG00000007739	Cct4	0.0372317	0.533664	0.932852	-1.07198	121.034	129.746
Hipk1	ENSMUSG00000008730	Hipk1	0.00146592	0.0339519	1.11646	1.11646	137.373	123.043
Tnrc6c	ENSMUSG00000025571	Tnrc6c	7.25929e-09	4.48702e-07	1.183	1.183	231.708	195.865
Eif3e	ENSMUSG00000022336	Eif3e	0.0171701	0.28319	0.930225	-1.07501	147.112	158.146
Tsc22d2	ENSMUSG00000027806	Tsc22d2	0.0360226	0.519755	1.10754	1.10754	101.134	91.3139
Utp3	ENSMUSG00000070697	Utp3	0.0415695	0.585559	0.92946	-1.07589	110.216	118.581
Selenow	ENSMUSG00000041571	Selenow	0.0151541	0.255532	0.947038	-1.05592	372.057	392.864
Rbm26	ENSMUSG00000022119	Rbm26	0.000119108	0.00354681	1.13477	1.13477	163.182	143.801
Aldh2	ENSMUSG00000029455	Aldh2	0.00444568	0.0904555	0.915319	-1.09251	152.961	167.113
Atp5j2	ENSMUSG00000038690	Atp5j2	1.77677e-11	1.44457e-09	0.8463	-1.18161	234.83	277.478
Rpl36a	ENSMUSG00000079435	Rpl36a	6.03891e-16	8.10454e-14	0.864107	-1.15726	1258.18	1456.05
Traf3	ENSMUSG00000021277	Traf3	1.76797e-12	1.62636e-10	1.2654	1.2654	230.763	182.363
Sgk3	ENSMUSG00000025915	Sgk3	0.0216849	0.342381	1.09899	1.09899	117.205	106.648
Ccnl1	ENSMUSG00000027829	Ccnl1	0.0407549	0.57574	1.07207	1.07207	129.455	120.753
BE692007	ENSMUSG00000099757	BE692007	0.00141738	0.0329055	1.08775	1.08775	381.852	351.047
Arpc5l	ENSMUSG00000026755	Arpc5l	2.08058e-07	9.8949e-06	0.875882	-1.14171	247.75	282.858
Sec61b	ENSMUSG00000053317	Sec61b	5.50218e-12	4.74933e-10	0.837427	-1.19413	237.185	283.23
Mon2	ENSMUSG00000034602	Mon2	0.00579501	0.113241	1.12133	1.12133	109.46	97.6165
Atp5g2	ENSMUSG00000062683	Atp5g2	6.78929e-06	0.000251473	0.90986	-1.09907	465.309	511.407
Qk	ENSMUSG00000062078	Qk	3.65678e-05	0.00117847	1.15155	1.15155	153.885	133.633
Selenoh	ENSMUSG00000076437	Selenoh	0.0420012	0.590366	0.917099	-1.09039	90.911	99.1289
Nsd3	ENSMUSG00000054823	Nsd3	7.69355e-06	0.00028088	1.14035	1.14035	251.72	220.738
Cacna1e	ENSMUSG00000004110	Cacna1e	7.49029e-05	0.0023296	1.19145	1.19145	234.21	196.575
Lrrfip1	ENSMUSG00000026305	Lrrfip1	0.00362822	0.0754685	1.106	1.106	133.093	120.337
Mllt10	ENSMUSG00000026743	Mllt10	1.97058e-11	1.59552e-09	1.23686	1.23686	217.225	175.626
Dgkd	ENSMUSG00000070738	Dgkd	9.08843e-22	2.1985e-19	1.30354	1.30354	348.83	267.602
Tpt1	ENSMUSG00000060126	Tpt1	2.3551e-15	2.97715e-13	0.884331	-1.1308	1782.35	2015.48
S1pr1	ENSMUSG00000045092	S1pr1	0.00195791	0.0436941	0.902702	-1.10779	162.153	179.631
Ttc14	ENSMUSG00000027677	Ttc14	0.0250094	0.384642	1.07004	1.07004	163.944	153.213
Vav3	ENSMUSG00000033721	Vav3	0.00570994	0.112217	1.16804	1.16804	106.588	91.2539
Hmox2	ENSMUSG00000004070	Hmox2	0.0153596	0.258776	0.915886	-1.09184	103.087	112.554
Nedd4l	ENSMUSG00000024589	Nedd4l	1.2795e-05	0.000452537	1.18958	1.18958	145.522	122.331
Cox17	ENSMUSG00000046516	Cox17	1.5997e-07	7.75853e-06	0.852816	-1.17259	145.16	170.213
Ifi213	ENSMUSG00000073491	Ifi213	0.000146232	0.00428933	1.2019	1.2019	121.263	100.893
Mapk14	ENSMUSG00000053436	Mapk14	0.0194377	0.312952	1.10972	1.10972	101.192	91.1874
Usp9x	ENSMUSG00000031010	Usp9x	0.00010917	0.00327577	1.15898	1.15898	127.427	109.948
Mgat4a	ENSMUSG00000026110	Mgat4a	0.0226145	0.354771	1.1075	1.1075	109.22	98.6191
Cox5b	ENSMUSG00000061518	Cox5b	1.70334e-06	7.07102e-05	0.884578	-1.13048	245.155	277.144
Rnf213	ENSMUSG00000070327	Rnf213	0.000160716	0.0047001	1.17171	1.17171	133.867	114.249
Setd2	ENSMUSG00000044791	Setd2	0.037288	0.53369	1.06756	1.06756	174.363	163.33
Rreb1	ENSMUSG00000039087	Rreb1	0.0331877	0.48384	1.09285	1.09285	118.475	108.409
Phkb	ENSMUSG00000036879	Phkb	0.00126559	0.0298053	1.16559	1.16559	108.742	93.2929
Arl15	ENSMUSG00000042348	Arl15	0.0027867	0.0600029	1.14952	1.14952	129.679	112.811
Tmem50a	ENSMUSG00000028822	Tmem50a	0.00310406	0.0658236	0.921153	-1.0856	177.553	192.751
Elmo1	ENSMUSG00000041112	Elmo1	2.96054e-33	4.46222e-30	1.39547	1.39547	697.874	500.099
Gimap5	ENSMUSG00000043505	Gimap5	0.0232329	0.362153	0.924474	-1.0817	122.709	132.734
Ash1l	ENSMUSG00000028053	Ash1l	4.8432e-08	2.5306e-06	1.17512	1.17512	268.72	228.675
Ndufb4	ENSMUSG00000022820	Ndufb4	0.0178557	0.29204	0.929058	-1.07636	141.206	151.988
Rpl15	ENSMUSG00000012405	Rpl15	7.70845e-14	8.39108e-12	0.879555	-1.13694	1234.1	1403.1
Myo1e	ENSMUSG00000032220	Myo1e	1.06275e-14	1.26203e-12	1.25185	1.25185	478.295	382.072
Dennd1b	ENSMUSG00000056268	Dennd1b	0.00613963	0.118522	1.09569	1.09569	210.539	192.152
Cast	ENSMUSG00000021585	Cast	0.0183823	0.299902	1.09357	1.09357	114.64	104.831
Arid1a	ENSMUSG00000007880	Arid1a	0.000197588	0.00562723	1.11605	1.11605	199.891	179.106
Atxn7l3b	ENSMUSG00000074748	Atxn7l3b	0.029508	0.440016	0.930442	-1.07476	118.638	127.507
Gsk3b	ENSMUSG00000022812	Gsk3b	3.08895e-05	0.00101552	1.1487	1.1487	169.553	147.603
Ppp4r3b	ENSMUSG00000020463	Ppp4r3b	0.000165905	0.00482306	1.12113	1.12113	177.43	158.26
Rps29	ENSMUSG00000034892	Rps29	2.65277e-22	6.75043e-20	0.84808	-1.17913	2302.03	2714.4
Kdm6a	ENSMUSG00000037369	Kdm6a	0.0240021	0.372366	1.10297	1.10297	113.329	102.749
Zswim6	ENSMUSG00000032846	Zswim6	0.00731008	0.13779	1.13557	1.13557	110.769	97.5456
Glg1	ENSMUSG00000003316	Glg1	0.0079966	0.148806	1.09426	1.09426	143.791	131.406
Mapk1	ENSMUSG00000063358	Mapk1	1.23028e-06	5.26334e-05	1.16214	1.16214	183.814	158.169
Spopl	ENSMUSG00000026771	Spopl	0.0205003	0.32844	1.131	1.131	94.6498	83.6866
Psme2	ENSMUSG00000079197	Psme2	0.00555849	0.10946	0.924453	-1.08172	220.772	238.814
Rap1a	ENSMUSG00000068798	Rap1a	0.0122547	0.214009	1.06429	1.06429	283.565	266.437
Baz1a	ENSMUSG00000035021	Baz1a	2.14914e-09	1.4131e-07	1.17244	1.17244	317.209	270.555
Rer1	ENSMUSG00000029048	Rer1	0.0298826	0.444586	0.923528	-1.0828	101.786	110.215
Rpl36	ENSMUSG00000057863	Rpl36	1.60161e-27	9.50968e-25	0.830689	-1.20382	2456.74	2957.48
Cd2ap	ENSMUSG00000061665	Cd2ap	0.0305174	0.452655	1.06665	1.06665	208.022	195.023
Kcnq1ot1	ENSMUSG00000101609	Kcnq1ot1	0.000555628	0.0144774	1.16704	1.16704	149.917	128.459
Adam10	ENSMUSG00000054693	Adam10	4.18123e-05	0.00133649	1.15393	1.15393	143.134	124.04
Sec11c	ENSMUSG00000024516	Sec11c	2.43926e-07	1.14616e-05	0.860628	-1.16194	172.324	200.231
Cd86	ENSMUSG00000022901	Cd86	0.000264313	0.00734603	1.19161	1.19161	122.471	102.778
Birc3	ENSMUSG00000032000	Birc3	2.48997e-10	1.77113e-08	1.17059	1.17059	344.652	294.424
Zmym4	ENSMUSG00000042446	Zmym4	0.0222416	0.3492	1.11181	1.11181	104.135	93.6627
Stag2	ENSMUSG00000025862	Stag2	0.000189389	0.00542528	1.12554	1.12554	188.126	167.143
Ankfy1	ENSMUSG00000020790	Ankfy1	0.0345881	0.502386	1.09138	1.09138	104.961	96.1728
Etnk1	ENSMUSG00000030275	Etnk1	1.11667e-08	6.63034e-07	1.17028	1.17028	275.598	235.498
Rpl12	ENSMUSG00000038900	Rpl12	3.14926e-17	4.83488e-15	0.856941	-1.16694	843.015	983.749
Phip	ENSMUSG00000032253	Phip	0.00036143	0.00982227	1.11811	1.11811	247.414	221.277
Pard3b	ENSMUSG00000052062	Pard3b	0.0484843	0.666668	1.16837	1.16837	85.8617	73.4888
Atrx	ENSMUSG00000031229	Atrx	0.0105116	0.18718	1.07642	1.07642	240.275	223.217
Ly6d	ENSMUSG00000034634	Ly6d	2.55792e-25	1.06638e-22	0.817262	-1.2236	1639.96	2006.65
Atpif1	ENSMUSG00000054428	Atpif1	0.00162767	0.0374325	0.888625	-1.12533	104.39	117.473
Pds5b	ENSMUSG00000034021	Pds5b	0.00258959	0.0561287	1.1329	1.1329	114.664	101.213
Vps28	ENSMUSG00000115987	Vps28	0.00456929	0.0922996	0.915365	-1.09246	142.288	155.444
Ddx17	ENSMUSG00000055065	Ddx17	0.000559804	0.0145475	1.1101	1.1101	185.865	167.431
N4bp2l2	ENSMUSG00000029655	N4bp2l2	2.76533e-05	0.000924638	1.13814	1.13814	161.639	142.02
Helz	ENSMUSG00000020721	Helz	0.010129	0.18125	1.11921	1.11921	105.091	93.8976
Fam193a	ENSMUSG00000037210	Fam193a	0.0132782	0.229228	1.10332	1.10332	116.645	105.722
Man1a2	ENSMUSG00000008763	Man1a2	0.032569	0.47802	1.08702	1.08702	123.966	114.042
Vps54	ENSMUSG00000020128	Vps54	0.0274128	0.41413	1.10736	1.10736	104.675	94.5268
Nptn	ENSMUSG00000032336	Nptn	0.00179959	0.0406704	1.12712	1.12712	124.428	110.395
Stk24	ENSMUSG00000063410	Stk24	2.9536e-05	0.000977581	1.12949	1.12949	205.101	181.588
Usp24	ENSMUSG00000028514	Usp24	0.0339578	0.493964	1.07297	1.07297	153.618	143.17
S100a11	ENSMUSG00000027907	S100a11	3.02049e-09	1.95325e-07	0.835975	-1.19621	193.211	231.121
Kcnq5	ENSMUSG00000028033	Kcnq5	5.07737e-25	2.07262e-22	1.46325	1.46325	520.866	355.966
Uba52	ENSMUSG00000090137	Uba52	1.71124e-16	2.39501e-14	0.851175	-1.17485	592.287	695.846
Rc3h1	ENSMUSG00000040423	Rc3h1	3.18921e-05	0.00104149	1.15839	1.15839	140.096	120.94
Sdc4	ENSMUSG00000017009	Sdc4	0.000644171	0.0164777	0.897676	-1.11399	151.782	169.083
Nop53	ENSMUSG00000041560	Nop53	0.0154442	0.259755	0.926101	-1.0798	133.337	143.977
Tcf12	ENSMUSG00000032228	Tcf12	5.28523e-14	5.81791e-12	1.29244	1.29244	261.879	202.623
Slfn2	ENSMUSG00000072620	Slfn2	0.0325375	0.477916	1.06961	1.06961	194.122	181.489
Zfp1	ENSMUSG00000055835	Zfp1	0.00526035	0.104218	1.12453	1.12453	106.539	94.7409
Uqcr10	ENSMUSG00000059534	Uqcr10	0.000225916	0.00633276	0.885622	-1.12915	129.488	146.211
Ubl5	ENSMUSG00000084786	Ubl5	7.3156e-09	4.49348e-07	0.86261	-1.15927	251.044	291.029
Dennd6a	ENSMUSG00000040818	Dennd6a	0.00123346	0.029189	1.12769	1.12769	143.567	127.311
Map2k4	ENSMUSG00000033352	Map2k4	0.000426022	0.0114506	1.16522	1.16522	108.784	93.3586
Clic1	ENSMUSG00000007041	Clic1	3.55157e-05	0.00115024	0.917634	-1.08976	422.709	460.651
Btbd9	ENSMUSG00000062202	Btbd9	8.26693e-12	6.92232e-10	1.28723	1.28723	188.751	146.633
Mettl23	ENSMUSG00000090266	Mettl23	0.0323289	0.475565	0.935357	-1.06911	140.272	149.966
Zfp148	ENSMUSG00000022811	Zfp148	1.58045e-05	0.000551019	1.15605	1.15605	166.018	143.608
Atp11b	ENSMUSG00000037400	Atp11b	0.0037404	0.077481	1.11114	1.11114	129.77	116.79
Trim44	ENSMUSG00000027189	Trim44	0.000641297	0.0164256	1.12777	1.12777	142.237	126.122
Uqcrb	ENSMUSG00000021520	Uqcrb	0.0124269	0.216439	0.928278	-1.07726	167.148	180.062
Arpc4	ENSMUSG00000079426	Arpc4	0.00217645	0.04797	0.918092	-1.08922	176.188	191.907
Ndufb10	ENSMUSG00000040048	Ndufb10	2.01359e-06	8.23681e-05	0.860478	-1.16215	135.567	157.548
Hnrnpu	ENSMUSG00000039630	Hnrnpu	0.00163421	0.037539	1.06914	1.06914	386.166	361.193
Smg6	ENSMUSG00000038290	Smg6	2.15979e-09	1.41535e-07	1.23158	1.23158	179.306	145.591
Rhoq	ENSMUSG00000024143	Rhoq	0.0130315	0.225329	1.09608	1.09608	127.297	116.139
Rps16	ENSMUSG00000037563	Rps16	1.10985e-24	4.18199e-22	0.844323	-1.18438	3433.51	4066.59
Zfp638	ENSMUSG00000030016	Zfp638	2.78709e-07	1.29716e-05	1.19098	1.19098	175.139	147.055
Sub1	ENSMUSG00000022205	Sub1	6.17878e-05	0.00194329	0.909774	-1.09917	331.701	364.598
Psma3	ENSMUSG00000060073	Psma3	0.0236128	0.367489	0.940805	-1.06292	187.446	199.24
Crip1	ENSMUSG00000006360	Crip1	9.52549e-13	8.93026e-11	0.831921	-1.20204	639.887	769.168
Btbd7	ENSMUSG00000041702	Btbd7	0.000973714	0.0237892	1.14434	1.14434	116.425	101.74
Zfand3	ENSMUSG00000044477	Zfand3	1.19201e-05	0.000426208	1.16288	1.16288	195.954	168.508
Supt4a	ENSMUSG00000020485	Supt4a	4.22619e-07	1.90363e-05	0.853824	-1.1712	136.907	160.346
Usp12	ENSMUSG00000029640	Usp12	0.0398257	0.565656	1.1085	1.1085	95.077	85.7707
Syncrip	ENSMUSG00000032423	Syncrip	0.01795	0.293338	1.08252	1.08252	143.192	132.277
Rasa1	ENSMUSG00000021549	Rasa1	0.00309735	0.0657524	1.13057	1.13057	116.555	103.095
Atp6v0e	ENSMUSG00000015575	Atp6v0e	1.66498e-08	9.65196e-07	0.853958	-1.17102	185.171	216.839
Rsf1	ENSMUSG00000035623	Rsf1	0.00797034	0.148707	1.09352	1.09352	152.572	139.524
Fam169b	ENSMUSG00000074071	Fam169b	3.96828e-05	0.00127676	1.16291	1.16291	167.273	143.84
Hectd1	ENSMUSG00000035247	Hectd1	0.00888044	0.161864	1.08054	1.08054	184.55	170.794
Srsf11	ENSMUSG00000055436	Srsf11	0.0112283	0.198026	1.06216	1.06216	285.528	268.819
Cyfip2	ENSMUSG00000020340	Cyfip2	0.00177499	0.0402536	1.09277	1.09277	213.602	195.468
Ttc7	ENSMUSG00000036918	Ttc7	0.0219195	0.345249	1.08521	1.08521	128.913	118.791
Dock10	ENSMUSG00000038608	Dock10	3.82674e-13	3.82556e-11	1.20822	1.20822	648.366	536.629
Ralgapa1	ENSMUSG00000021027	Ralgapa1	1.84305e-06	7.57079e-05	1.19997	1.19997	148.62	123.853
Tomm7	ENSMUSG00000028998	Tomm7	6.69866e-06	0.000249532	0.884405	-1.1307	217.177	245.562
Csk	ENSMUSG00000032312	Csk	0.00051438	0.0135285	0.916262	-1.09139	228.645	249.541
Ndufa1	ENSMUSG00000016427	Ndufa1	0.00209659	0.0463142	0.90824	-1.10103	135.401	149.081
Plekhj1	ENSMUSG00000035278	Plekhj1	0.000342993	0.00936019	0.897137	-1.11466	132.329	147.501
Spcs2	ENSMUSG00000035227	Spcs2	0.0209619	0.333654	0.935176	-1.06932	166.812	178.375
Psenen	ENSMUSG00000036835	Psenen	1.48124e-06	6.24159e-05	0.871852	-1.14698	178.578	204.826
Cbl	ENSMUSG00000034342	Cbl	0.000308898	0.00850078	1.1273	1.1273	163.69	145.205
Tlk1	ENSMUSG00000041997	Tlk1	0.0145881	0.24834	1.08535	1.08535	153.293	141.239
Pglyrp1	ENSMUSG00000030413	Pglyrp1	0.00803958	0.149457	0.89652	-1.11542	104.505	116.568
Satb1	ENSMUSG00000023927	Satb1	2.07829e-23	6.17e-21	1.39906	1.39906	308.299	220.361
Srp14	ENSMUSG00000009549	Srp14	0.000473391	0.0125857	0.898791	-1.11261	137.638	153.137
Rpl22l1	ENSMUSG00000039221	Rpl22l1	0.000895635	0.02213	0.922013	-1.08458	361.768	392.368
Ncoa2	ENSMUSG00000005886	Ncoa2	3.7007e-09	2.36966e-07	1.24721	1.24721	170.508	136.711
1810058I24Rik	ENSMUSG00000073155	1810058I24Rik	0.00204869	0.0454095	0.894629	-1.11778	107.143	119.762
Rbis	ENSMUSG00000078784	Rbis	0.0193117	0.31118	0.920881	-1.08592	114.194	124.005
Jmjd1c	ENSMUSG00000037876	Jmjd1c	1.81462e-10	1.33168e-08	1.23517	1.23517	223.469	180.921
Bdp1	ENSMUSG00000049658	Bdp1	0.00235708	0.0514305	1.12208	1.12208	123.849	110.374
Arhgef18	ENSMUSG00000004568	Arhgef18	7.15998e-12	6.0471e-10	1.24653	1.24653	345.416	277.102
Phf20l1	ENSMUSG00000072501	Phf20l1	2.07624e-07	9.8949e-06	1.18305	1.18305	192.72	162.901
Sf3b5	ENSMUSG00000078348	Sf3b5	0.00973646	0.174864	0.921739	-1.08491	129.826	140.849
Rpl24	ENSMUSG00000098274	Rpl24	9.71895e-21	2.18889e-18	0.851153	-1.17488	1453.31	1707.46
Tut4	ENSMUSG00000034610	Tut4	2.10337e-08	1.18771e-06	1.13781	1.13781	489.601	430.299
Btf3	ENSMUSG00000021660	Btf3	1.80631e-05	0.000623113	0.914467	-1.09353	460.672	503.76
Dok3	ENSMUSG00000035711	Dok3	3.56931e-08	1.92135e-06	0.855233	-1.16927	180.135	210.627
Fth1	ENSMUSG00000024661	Fth1	1.36493e-26	7.22824e-24	0.839702	-1.1909	1847.93	2200.7
Ncoa1	ENSMUSG00000020647	Ncoa1	0.00149905	0.0345965	1.12532	1.12532	162.668	144.553
Sh3pxd2a	ENSMUSG00000053617	Sh3pxd2a	0.00358188	0.0746114	1.11228	1.11228	135.603	121.914
Ppp3cb	ENSMUSG00000021816	Ppp3cb	0.000328034	0.00899861	1.13965	1.13965	128.588	112.831
Bcar3	ENSMUSG00000028121	Bcar3	2.75376e-18	4.90519e-16	1.33592	1.33592	423.543	317.043
St6gal1	ENSMUSG00000022885	St6gal1	4.77163e-08	2.49988e-06	1.18637	1.18637	344.527	290.405
Cept1	ENSMUSG00000040774	Cept1	0.000205654	0.00583154	1.15886	1.15886	140.848	121.54
Tpst2	ENSMUSG00000029344	Tpst2	0.0462104	0.640344	0.920593	-1.08626	103.864	112.823
Tm9sf2	ENSMUSG00000025544	Tm9sf2	0.0211387	0.33569	1.07727	1.07727	150.7	139.89
Cnot2	ENSMUSG00000020166	Cnot2	0.000341878	0.00934276	1.12644	1.12644	183.73	163.107
Atp5c1	ENSMUSG00000025781	Atp5c1	0.000246066	0.00687791	0.912125	-1.09634	229.175	251.253
Setd5	ENSMUSG00000034269	Setd5	0.000166501	0.00482765	1.13065	1.13065	189.046	167.2
Ambra1	ENSMUSG00000040506	Ambra1	3.86048e-06	0.000150682	1.18749	1.18749	143.899	121.18
Rps14	ENSMUSG00000024608	Rps14	1.75592e-20	3.82282e-18	0.856278	-1.16785	1225.38	1431.06
Ythdf3	ENSMUSG00000047213	Ythdf3	0.0428371	0.600823	1.08589	1.08589	115.194	106.083
Swi5	ENSMUSG00000044627	Swi5	0.00428128	0.087201	0.914195	-1.09386	132.685	145.138
Foxn3	ENSMUSG00000033713	Foxn3	3.59059e-37	7.81711e-34	1.30714	1.30714	1156.23	884.549
Ncoa6	ENSMUSG00000038369	Ncoa6	0.0238334	0.370334	1.11334	1.11334	98.4996	88.4719
Chd1	ENSMUSG00000023852	Chd1	0.00915103	0.166177	1.08891	1.08891	156.803	144
Hexb	ENSMUSG00000021665	Hexb	8.29115e-05	0.00254236	0.910144	-1.09873	1028.5	1130.04
Tgfbr2	ENSMUSG00000032440	Tgfbr2	9.23746e-08	4.65292e-06	1.15853	1.15853	298.01	257.232
Hspa4	ENSMUSG00000020361	Hspa4	0.0162178	0.270214	1.07009	1.07009	215.877	201.737
Fubp1	ENSMUSG00000028034	Fubp1	0.00464819	0.0936039	1.08529	1.08529	202.126	186.241
Ndufa5	ENSMUSG00000023089	Ndufa5	0.0370096	0.531647	0.926233	-1.07964	105.735	114.156
Rpl21	ENSMUSG00000041453	Rpl21	7.70088e-22	1.88614e-19	0.864113	-1.15726	3400.35	3935.08
Bclaf1	ENSMUSG00000037608	Bclaf1	0.000507856	0.013411	1.10711	1.10711	195.835	176.889
Tbc1d1	ENSMUSG00000029174	Tbc1d1	2.71189e-09	1.77123e-07	1.21055	1.21055	245.62	202.899
Btaf1	ENSMUSG00000040565	Btaf1	6.15529e-08	3.17386e-06	1.23272	1.23272	130.185	105.609
Cdk12	ENSMUSG00000003119	Cdk12	0.00146507	0.0339519	1.10916	1.10916	168.546	151.958
Mknk2	ENSMUSG00000020190	Mknk2	0.00823486	0.152532	0.917917	-1.08942	122.371	133.314
Rwdd1	ENSMUSG00000019782	Rwdd1	0.0246932	0.381275	0.913453	-1.09475	98.056	107.346
Cd22	ENSMUSG00000030577	Cd22	0.0035763	0.0746114	1.06976	1.06976	364.802	341.012
Frg1	ENSMUSG00000031590	Frg1	0.0230781	0.360025	0.917709	-1.08967	100.186	109.17
Ubr5	ENSMUSG00000037487	Ubr5	0.039935	0.566199	1.08602	1.08602	117.152	107.873
Birc6	ENSMUSG00000024073	Birc6	0.00045469	0.0121544	1.10314	1.10314	260.327	235.986
Rps4x	ENSMUSG00000031320	Rps4x	1.49477e-13	1.58316e-11	0.894114	-1.11843	3152.88	3526.26
Smg1	ENSMUSG00000030655	Smg1	7.66194e-14	8.38705e-12	1.23909	1.23909	302.272	243.947
Bmt2	ENSMUSG00000042742	Bmt2	0.000294624	0.00814225	1.15669	1.15669	134.524	116.301
Pum2	ENSMUSG00000020594	Pum2	6.91555e-05	0.00216459	1.13387	1.13387	191.925	169.265
Akap10	ENSMUSG00000047804	Akap10	0.00108095	0.026116	1.14419	1.14419	117.03	102.282
Hivep1	ENSMUSG00000021366	Hivep1	0.00517325	0.102908	1.13996	1.13996	110.915	97.2977
Cop1	ENSMUSG00000040782	Cop1	0.000451829	0.012111	1.14801	1.14801	130.881	114.007
Rps9	ENSMUSG00000006333	Rps9	1.77201e-25	7.548e-23	0.849838	-1.17669	2145.31	2524.37
Abl2	ENSMUSG00000026596	Abl2	0.00416888	0.0851772	1.13419	1.13419	112.961	99.5965
Nfkbia	ENSMUSG00000021025	Nfkbia	0.00781112	0.146601	1.07492	1.07492	276.993	257.687
Cr1l	ENSMUSG00000016481	Cr1l	0.0229348	0.358076	1.08964	1.08964	118.364	108.627
Igkv5-48	ENSMUSG00000076563	Igkv5-48	0.0471102	0.651431	0.887227	-1.12711	161.935	182.518
Supt20	ENSMUSG00000027751	Supt20	0.00454018	0.0920361	1.1008	1.1008	133.017	120.837
D8Ertd738e	ENSMUSG00000019362	D8Ertd738e	0.00112038	0.0268371	0.906943	-1.1026	152.991	168.688
Taf3	ENSMUSG00000025782	Taf3	0.0417851	0.588173	1.09955	1.09955	103.378	94.0188
Epb41	ENSMUSG00000028906	Epb41	0.0153989	0.259214	1.09318	1.09318	137.674	125.939
Ndufa8	ENSMUSG00000026895	Ndufa8	0.0413986	0.583571	0.918578	-1.08864	92.1931	100.365
H2afv	ENSMUSG00000041126	.	2.72961e-06	0.000109823	0.857107	-1.16672	131.166	153.033
Tnks2	ENSMUSG00000024811	Tnks2	3.31339e-06	0.000130367	1.15621	1.15621	192.029	166.084
Brd4	ENSMUSG00000024002	Brd4	0.00585977	0.114245	1.07986	1.07986	216.716	200.69
Rsbn1	ENSMUSG00000044098	Rsbn1	0.00369558	0.0767067	1.11623	1.11623	116.645	104.5
Sf3b6	ENSMUSG00000037361	Sf3b6	0.00314815	0.0665424	0.918169	-1.08912	159.183	173.37
Lsm6	ENSMUSG00000031683	Lsm6	0.0474879	0.65619	0.934989	-1.06953	123.372	131.95
Wdr43	ENSMUSG00000041057	Wdr43	0.0221358	0.347819	1.08767	1.08767	127.612	117.327
Atf2	ENSMUSG00000027104	Atf2	0.0172533	0.284323	1.11999	1.11999	99.7941	89.1026
S100a6	ENSMUSG00000001025	S100a6	0.00929798	0.168311	1.26949	1.26949	98.9073	77.9111
R3hdm1	ENSMUSG00000056211	R3hdm1	4.71559e-06	0.000180463	1.17744	1.17744	160.871	136.628
Sh3bgrl3	ENSMUSG00000028843	Sh3bgrl3	1.87608e-14	2.13721e-12	0.868164	-1.15186	865.973	997.477
Arl5c	ENSMUSG00000038352	Arl5c	0.0496054	0.678111	0.906297	-1.10339	85.5448	94.3894
Serinc3	ENSMUSG00000017707	Serinc3	0.0012683	0.0298331	1.05521	1.05521	653.295	619.116
Csnk1g1	ENSMUSG00000032384	Csnk1g1	0.0450947	0.626213	1.08971	1.08971	108.162	99.2576
Phf3	ENSMUSG00000048874	Phf3	0.0165615	0.27454	1.08008	1.08008	155.51	143.98
Mrps14	ENSMUSG00000058267	Mrps14	0.0173414	0.285056	0.920152	-1.08678	112.734	122.517
Ccnt2	ENSMUSG00000026349	Ccnt2	0.0125973	0.218822	1.10174	1.10174	116.233	105.499
Ndufc2	ENSMUSG00000030647	Ndufc2	0.00134769	0.0315114	0.898265	-1.11326	116.226	129.389
Rabgap1	ENSMUSG00000035437	Rabgap1	0.0323096	0.475565	1.09831	1.09831	104.745	95.3692
Itch	ENSMUSG00000027598	Itch	0.0122046	0.213325	1.08867	1.08867	156.615	143.859
Snrpe	ENSMUSG00000090553	Snrpe	4.11776e-05	0.00132212	0.896056	-1.116	219.1	244.516
Gpr18	ENSMUSG00000050350	Gpr18	0.000515946	0.0135393	0.899035	-1.1123	154.27	171.595
Jak1	ENSMUSG00000028530	Jak1	1.34539e-07	6.60691e-06	1.13129	1.13129	390.836	345.479
Ddx54	ENSMUSG00000029599	Ddx54	0.0388	0.55331	1.07039	1.07039	130.434	121.857
Map4	ENSMUSG00000032479	Map4	0.0294525	0.439605	1.08822	1.08822	114.312	105.044
Cd83	ENSMUSG00000015396	Cd83	1.40521e-05	0.000493437	1.16943	1.16943	274.053	234.347
Ppp1r10	ENSMUSG00000039220	Ppp1r10	7.25151e-07	3.15047e-05	1.21447	1.21447	125.575	103.399
Tnpo1	ENSMUSG00000009470	Tnpo1	0.000976545	0.0238287	1.12695	1.12695	132.304	117.4
Ifi214	ENSMUSG00000070501	Ifi214	0.0192906	0.311094	1.12919	1.12919	101.26	89.6755
Arid1b	ENSMUSG00000069729	Arid1b	5.58451e-12	4.7783e-10	1.22941	1.22941	319.367	259.774
Arhgdia	ENSMUSG00000025132	Arhgdia	0.00271163	0.0585796	0.92104	-1.08573	188.041	204.162
Mia2	ENSMUSG00000021000	Mia2	0.00300743	0.0641914	1.1025	1.1025	155.448	140.996
Unc93b1	ENSMUSG00000036908	Unc93b1	0.0156027	0.26197	0.95662	-1.04535	516.901	540.341
Babam2	ENSMUSG00000052139	Babam2	3.95756e-09	2.52588e-07	1.22869	1.22869	188.359	153.301
Rps6	ENSMUSG00000028495	Rps6	2.73811e-09	1.78241e-07	0.888976	-1.12489	577.051	649.118
Rpl35	ENSMUSG00000062997	Rpl35	3.56076e-23	1.01115e-20	0.840453	-1.18983	1642.37	1954.15
Srgn	ENSMUSG00000020077	Srgn	0.00455154	0.0920361	0.944638	-1.05861	555.343	587.889
H2-Oa	ENSMUSG00000024334	H2-Oa	5.88369e-06	0.000222226	0.885416	-1.12941	244.938	276.636
Sys1	ENSMUSG00000045503	Sys1	0.0112512	0.198125	0.920745	-1.08608	132.114	143.486
Rpl27a	ENSMUSG00000046364	Rpl27a	1.28221e-25	5.81783e-23	0.841892	-1.1878	1904.72	2262.42
Apobec3	ENSMUSG00000009585	Apobec3	0.000127306	0.00376804	1.07785	1.07785	482.189	447.362
Ubc	ENSMUSG00000008348	Ubc	0.00403561	0.0827997	0.919763	-1.08724	169.42	184.2
Cnot6l	ENSMUSG00000034724	Cnot6l	2.97275e-07	1.37377e-05	1.1856	1.1856	176.118	148.549
Ppp4r1	ENSMUSG00000061950	Ppp4r1	0.0484207	0.666261	1.1033	1.1033	95.5535	86.6073
Rpl19	ENSMUSG00000017404	Rpl19	2.76261e-24	9.4966e-22	0.854725	-1.16997	3057.15	3576.77
Slc10a7	ENSMUSG00000031684	Slc10a7	0.00195272	0.0436279	1.13892	1.13892	123.538	108.47
Srrm2	ENSMUSG00000039218	Srrm2	3.2131e-11	2.5183e-09	1.12443	1.12443	656.431	583.789
Nudcd3	ENSMUSG00000053838	Nudcd3	9.76292e-05	0.00295664	1.13699	1.13699	150.447	132.32
Rps25	ENSMUSG00000009927	Rps25	3.36395e-12	2.9825e-10	0.859784	-1.16308	422.396	491.282
Prr14l	ENSMUSG00000054280	Prr14l	0.00870411	0.159839	1.09577	1.09577	137.409	125.399
Rpl3	ENSMUSG00000060036	Rpl3	0.00388398	0.0800238	0.952515	-1.04985	1027.05	1078.25
AW112010	ENSMUSG00000075010	AW112010	0.00198247	0.0441415	0.867768	-1.15238	91.3876	105.313
Esyt2	ENSMUSG00000021171	Esyt2	0.0215585	0.340764	1.11972	1.11972	99.3808	88.7547
Cd74	ENSMUSG00000024610	Cd74	2.63017e-13	2.67024e-11	0.919374	-1.0877	20823.2	22649.4
H3f3a	ENSMUSG00000060743	H3f3a	2.86345e-19	5.55509e-17	0.85696	-1.16692	1255.51	1465.07
Kdm5a	ENSMUSG00000030180	Kdm5a	0.00924976	0.167815	1.09146	1.09146	137.76	126.216
Tcf25	ENSMUSG00000001472	Tcf25	2.9634e-06	0.00011754	1.12098	1.12098	270.47	241.28
Tecr	ENSMUSG00000031708	Tecr	0.0190259	0.308348	0.929151	-1.07625	131.057	141.05
Actr2	ENSMUSG00000020152	Actr2	5.16983e-07	2.2918e-05	1.13094	1.13094	295.894	261.635
Smarca2	ENSMUSG00000024921	Smarca2	0.0287159	0.431487	1.07842	1.07842	141.969	131.645
Cmtm7	ENSMUSG00000032436	Cmtm7	0.00458331	0.0923924	0.916267	-1.09139	145.965	159.304
Mbnl1	ENSMUSG00000027763	Mbnl1	6.29882e-24	1.99063e-21	1.26159	1.26159	946.468	750.22
Uqcr11	ENSMUSG00000020163	Uqcr11	0.000967642	0.0237	0.895068	-1.11723	126.982	141.869
Cep350	ENSMUSG00000033671	Cep350	0.000640356	0.016423	1.12736	1.12736	147.966	131.25
Paip2	ENSMUSG00000037058	Paip2	0.00454504	0.0920361	0.920535	-1.08632	161.022	174.922
Suclg2	ENSMUSG00000061838	Suclg2	0.0373592	0.534318	1.10253	1.10253	104.254	94.5591
Tnik	ENSMUSG00000027692	Tnik	0.049967	0.682267	1.14395	1.14395	87.8192	76.7684
Rpl13a	ENSMUSG00000074129	Rpl13a	3.15844e-17	4.83488e-15	0.874528	-1.14347	1512.14	1729.09
Tle4	ENSMUSG00000024642	Tle4	0.000546589	0.0142608	1.13793	1.13793	145.339	127.722
Acin1	ENSMUSG00000022185	Acin1	0.037919	0.541929	1.05367	1.05367	251.361	238.557
Capza1	ENSMUSG00000070372	Capza1	0.00894475	0.162884	1.07459	1.07459	201.87	187.859
Phc3	ENSMUSG00000037652	Phc3	0.0446565	0.621449	1.09487	1.09487	100.353	91.6577
Iqsec1	ENSMUSG00000034312	Iqsec1	5.26671e-05	0.00166714	1.15931	1.15931	147.036	126.831
Iws1	ENSMUSG00000024384	Iws1	0.029458	0.439605	1.09554	1.09554	105.12	95.9526
Arih1	ENSMUSG00000025234	Arih1	9.58079e-12	7.9545e-10	1.25017	1.25017	214.026	171.197
Tap2	ENSMUSG00000024339	Tap2	0.0323788	0.475941	0.930257	-1.07497	113.564	122.078
Snx30	ENSMUSG00000028385	Snx30	5.48027e-07	2.42394e-05	1.16958	1.16958	209.756	179.343
AW554918	ENSMUSG00000033632	AW554918	0.00169366	0.0387682	1.15983	1.15983	113.819	98.1343
Osbpl8	ENSMUSG00000020189	Osbpl8	9.2074e-06	0.000332859	1.17379	1.17379	172.555	147.007
Spata5	ENSMUSG00000027722	Spata5	0.00111316	0.0266968	1.1536	1.1536	116.56	101.04
Trim30d	ENSMUSG00000057596	Trim30d	0.0084996	0.15623	1.15853	1.15853	98.3817	84.9197
Scaf8	ENSMUSG00000046201	Scaf8	0.000967467	0.0237	1.1227	1.1227	141.196	125.765
Trpm7	ENSMUSG00000027365	Trpm7	0.00380491	0.0786106	1.1305	1.1305	108.59	96.0544
Snx20	ENSMUSG00000031662	Snx20	0.000298463	0.00823673	0.889147	-1.12467	129.989	146.195
Thoc2	ENSMUSG00000037475	Thoc2	0.00301647	0.0643141	1.10557	1.10557	146.494	132.506
Eef2	ENSMUSG00000034994	Eef2	4.64605e-06	0.00017815	0.927718	-1.07791	781.97	842.896
Supt3	ENSMUSG00000038954	Supt3	0.021431	0.339465	1.13375	1.13375	99.2151	87.5106
Gngt2	ENSMUSG00000038811	Gngt2	0.00174059	0.0395974	0.880688	-1.13548	100.159	113.728
Heca	ENSMUSG00000039879	Heca	0.0267464	0.407332	1.09307	1.09307	113.692	104.011
Wac	ENSMUSG00000024283	Wac	4.36912e-06	0.000169187	1.15839	1.15839	170.398	147.099
Myl6	ENSMUSG00000090841	Myl6	2.9465e-13	2.97597e-11	0.855936	-1.16831	445.105	520.022
Rps28	ENSMUSG00000067288	Rps28	1.50531e-26	7.56281e-24	0.833957	-1.1991	2324.93	2787.83
Stat3	ENSMUSG00000004040	Stat3	0.0252218	0.386998	1.07972	1.07972	132.983	123.164
Rpl7	ENSMUSG00000043716	Rpl7	1.20127e-08	7.11108e-07	0.906719	-1.10288	1010.99	1115
Grcc10	ENSMUSG00000072772	Grcc10	4.88868e-15	5.9868e-13	0.826834	-1.20943	306.419	370.593
Dapp1	ENSMUSG00000028159	Dapp1	2.05213e-06	8.37697e-05	1.18164	1.18164	167.211	141.507
Cirbp	ENSMUSG00000045193	Cirbp	0.0380313	0.542743	0.93153	-1.0735	114.123	122.512
Calm3	ENSMUSG00000019370	Calm3	0.00608997	0.118029	0.911736	-1.09681	118.606	130.088
Pfdn5	ENSMUSG00000001289	Pfdn5	2.3474e-12	2.1294e-10	0.86025	-1.16245	390.22	453.613
Il10ra	ENSMUSG00000032089	Il10ra	0.00552052	0.108822	1.09668	1.09668	144.96	132.181
Rpl8	ENSMUSG00000003970	Rpl8	9.08796e-17	1.30933e-14	0.881026	-1.13504	2368.03	2687.81
Smurf2	ENSMUSG00000018363	Smurf2	0.0379476	0.541942	1.09574	1.09574	109.986	100.376
Gtf2h5	ENSMUSG00000034345	Gtf2h5	0.0186932	0.303963	0.910996	-1.0977	99.6827	109.422
Mark2	ENSMUSG00000024969	Mark2	0.0406499	0.574671	1.07158	1.07158	133.469	124.553
4932438A13Rik	ENSMUSG00000037270	4932438A13Rik	2.91488e-06	0.00011585	1.18316	1.18316	157.051	132.738
Anapc11	ENSMUSG00000025135	Anapc11	0.00247723	0.0539321	0.895096	-1.1172	100.226	111.972
Khdrbs1	ENSMUSG00000028790	Khdrbs1	0.0105082	0.18718	1.07614	1.07614	186.018	172.856
Rpl6	ENSMUSG00000029614	Rpl6	1.60446e-16	2.2617e-14	0.88266	-1.13294	2699.18	3058.01
Arpc3	ENSMUSG00000029465	Arpc3	1.10634e-09	7.47504e-08	0.875288	-1.14248	328.258	375.029
Rps26	ENSMUSG00000025362	Rps26	5.83026e-27	3.26394e-24	0.833346	-1.19998	2679.07	3214.84
Cox8a	ENSMUSG00000035885	Cox8a	9.59267e-18	1.62033e-15	0.838465	-1.19266	479.554	571.943
Ndufa7	ENSMUSG00000041881	Ndufa7	1.53451e-05	0.000535959	0.88653	-1.12799	200.75	226.445
Ewsr1	ENSMUSG00000009079	Ewsr1	0.0149404	0.252951	1.07502	1.07502	165.125	153.602
Tcf4	ENSMUSG00000053477	Tcf4	0.0281245	0.423901	1.07282	1.07282	219.104	204.232
Phlpp1	ENSMUSG00000044340	Phlpp1	1.71146e-05	0.00059353	1.21773	1.21773	137.134	112.615
Malt1	ENSMUSG00000032688	Malt1	1.03556e-06	4.44972e-05	1.13932	1.13932	479.376	420.755
Myl12a	ENSMUSG00000024048	Myl12a	5.5847e-07	2.45351e-05	0.875918	-1.14166	221.058	252.373
Ndufb8	ENSMUSG00000025204	Ndufb8	0.000600241	0.0154752	0.896202	-1.11582	126.599	141.261
Rock2	ENSMUSG00000020580	Rock2	7.20542e-06	0.000265881	1.16097	1.16097	188.349	162.234
Herc2	ENSMUSG00000030451	Herc2	0.00678836	0.129388	1.09487	1.09487	153.359	140.07
Nrd1	ENSMUSG00000053510	Nrd1	0.0259167	0.396728	1.07096	1.07096	168.444	157.284
Cyba	ENSMUSG00000006519	Cyba	4.30064e-11	3.34392e-09	0.884772	-1.13023	705.104	796.933
Umad1	ENSMUSG00000089862	Umad1	0.0051136	0.101929	1.15013	1.15013	106.454	92.5582
Blvrb	ENSMUSG00000040466	Blvrb	0.00155347	0.035768	0.893829	-1.11878	127.153	142.256
Ptpn4	ENSMUSG00000026384	Ptpn4	0.0105178	0.18718	1.13546	1.13546	103.534	91.1818
Arpp19	ENSMUSG00000007656	Arpp19	3.47921e-05	0.00112867	0.891611	-1.12156	179.261	201.053
Sumo2	ENSMUSG00000020738	Sumo2	6.66177e-05	0.00208849	0.912908	-1.0954	303.873	332.862
Nsa2	ENSMUSG00000060739	Nsa2	9.7472e-06	0.000351078	0.903336	-1.10701	335.345	371.229
Ddx10	ENSMUSG00000053289	Ddx10	0.0332707	0.484689	1.11105	1.11105	97.1197	87.4126
Zfp292	ENSMUSG00000039967	Zfp292	0.000709454	0.0180065	1.10826	1.10826	227.423	205.207
Timm13	ENSMUSG00000020219	Timm13	0.0188368	0.305789	0.928165	-1.07739	137.501	148.143
Atp5e	ENSMUSG00000016252	Atp5e	9.65565e-17	1.38097e-14	0.853517	-1.17162	677.293	793.531
Nr2c2	ENSMUSG00000005893	Nr2c2	0.00927492	0.168115	1.12076	1.12076	108.499	96.809
Nfat5	ENSMUSG00000003847	Nfat5	0.000834573	0.0209113	1.13456	1.13456	153.524	135.315
Lcorl	ENSMUSG00000015882	Lcorl	0.0155785	0.261788	1.11169	1.11169	118.904	106.958
Rplp1	ENSMUSG00000007892	Rplp1	1.08641e-17	1.804e-15	0.863749	-1.15774	2066.88	2392.91
Rnf145	ENSMUSG00000019189	Rnf145	0.00643346	0.123707	1.10382	1.10382	129.526	117.344
Sbno1	ENSMUSG00000038095	Sbno1	0.016492	0.273983	1.08105	1.08105	145.352	134.455
Ecpas	ENSMUSG00000050812	Ecpas	0.0403252	0.571317	1.091	1.091	114.536	104.983
Dlg1	ENSMUSG00000022770	Dlg1	2.82536e-06	0.000113211	1.18348	1.18348	161.174	136.187
Rhoh	ENSMUSG00000029204	Rhoh	0.0128657	0.22309	1.07942	1.07942	209.567	194.149
Rpsa	ENSMUSG00000032518	Rpsa	1.6873e-08	9.75247e-07	0.920643	-1.0862	3718.1	4038.59
Manf	ENSMUSG00000032575	Manf	0.0120287	0.211382	0.909233	-1.09983	111.155	122.251
Scaf4	ENSMUSG00000022983	Scaf4	0.0425946	0.598279	1.09371	1.09371	101.49	92.7944
Rpl29	ENSMUSG00000048758	Rpl29	3.17466e-11	2.49817e-09	0.889995	-1.1236	1318.95	1481.98
Snrpb	ENSMUSG00000027404	Snrpb	0.00052108	0.0136316	0.906467	-1.10318	176.528	194.743
A330040F15Rik	ENSMUSG00000086213	A330040F15Rik	0.000624841	0.016046	1.16298	1.16298	123.523	106.213
Phtf2	ENSMUSG00000039987	Phtf2	1.36256e-09	9.11196e-08	1.26166	1.26166	170.51	135.147
Ncor1	ENSMUSG00000018501	Ncor1	0.00241141	0.0525575	1.08128	1.08128	280.545	259.456
Pnisr	ENSMUSG00000028248	Pnisr	0.00111179	0.0266968	1.10952	1.10952	167.698	151.145
Smdt1	ENSMUSG00000022452	Smdt1	3.06347e-06	0.000121019	0.862097	-1.15996	131.44	152.465
Irf5	ENSMUSG00000029771	Irf5	0.0141112	0.241903	0.923074	-1.08334	120.38	130.412
Cspp1	ENSMUSG00000056763	Cspp1	0.049628	0.678111	1.09776	1.09776	102.994	93.8223
Klf2	ENSMUSG00000055148	Klf2	1.07589e-11	8.89497e-10	0.810451	-1.23388	457.935	565.037
Rps20	ENSMUSG00000028234	Rps20	5.23958e-25	2.09519e-22	0.842471	-1.18699	5036.74	5978.53
Gstp1	ENSMUSG00000060803	Gstp1	2.05747e-08	1.16515e-06	0.851697	-1.17413	197.087	231.405
Yeats4	ENSMUSG00000020171	Yeats4	0.0295598	0.440452	0.927926	-1.07767	115.381	124.343
Tasor	ENSMUSG00000040651	Tasor	5.72694e-08	2.96861e-06	1.20881	1.20881	167.619	138.664
Nop10	ENSMUSG00000027133	Nop10	8.02396e-05	0.00246429	0.89633	-1.11566	243.709	271.897
Prpf4b	ENSMUSG00000021413	Prpf4b	0.00575143	0.112806	1.08667	1.08667	198.322	182.505
Ppib	ENSMUSG00000032383	Ppib	0.000697986	0.0177384	0.919282	-1.08781	248.173	269.964
Ppp2r5e	ENSMUSG00000021051	Ppp2r5e	0.0440014	0.614076	1.08945	1.08945	105.372	96.7202
Ly6e	ENSMUSG00000022587	Ly6e	0.000516171	0.0135393	0.95578	-1.04627	2121.8	2219.97
Ptp4a2	ENSMUSG00000028788	Ptp4a2	7.42012e-05	0.00231144	1.08476	1.08476	410.617	378.532
Capg	ENSMUSG00000056737	Capg	0.00873516	0.160259	0.92934	-1.07603	233.081	250.803
Gpx4	ENSMUSG00000075706	Gpx4	8.79639e-06	0.000319179	0.867123	-1.15324	149.403	172.298
Xrn1	ENSMUSG00000032410	Xrn1	0.0109081	0.1929	1.10722	1.10722	118.947	107.429
Timm10b	ENSMUSG00000089847	Timm10b	0.0111963	0.19764	0.918276	-1.089	116.831	127.229
Rtraf	ENSMUSG00000021807	Rtraf	0.0206866	0.330884	0.933373	-1.07138	156.202	167.352
Pibf1	ENSMUSG00000022064	Pibf1	0.00624093	0.120123	1.13994	1.13994	106.818	93.7051
Upf2	ENSMUSG00000043241	Upf2	0.0167033	0.276301	1.08555	1.08555	135.873	125.166
Sppl2a	ENSMUSG00000027366	Sppl2a	0.000500688	0.0132574	1.14101	1.14101	116.569	102.163
Rps10	ENSMUSG00000052146	Rps10	6.01181e-28	4.06191e-25	0.834101	-1.1989	2922.74	3504.07
Ndufs8	ENSMUSG00000059734	Ndufs8	0.0229009	0.357831	0.916133	-1.09155	103.611	113.096
A630001G21Rik	ENSMUSG00000052760	A630001G21Rik	8.91149e-06	0.000322757	1.14047	1.14047	215.482	188.941
Nrros	ENSMUSG00000052384	Nrros	4.76252e-23	1.3331e-20	1.31347	1.31347	401.866	305.958
Gnb2	ENSMUSG00000029713	Gnb2	6.02244e-06	0.000226061	0.877864	-1.13913	172.865	196.915
Eif2s1	ENSMUSG00000021116	Eif2s1	0.02533	0.388354	1.08626	1.08626	117.827	108.471
Pag1	ENSMUSG00000027508	Pag1	1.40391e-32	1.71927e-29	1.44873	1.44873	414.14	285.864
Btg1	ENSMUSG00000036478	Btg1	0.000215673	0.0060717	0.935203	-1.06929	640.905	685.311
Usp25	ENSMUSG00000022867	Usp25	3.11949e-06	0.000122984	1.17791	1.17791	139.147	118.13
Ube2r2	ENSMUSG00000036241	Ube2r2	0.00487687	0.0978	0.91254	-1.09584	153.719	168.452
Psmb3	ENSMUSG00000069744	Psmb3	0.0447066	0.621704	0.946397	-1.05664	196.569	207.702
Rsrc1	ENSMUSG00000034544	Rsrc1	4.8224e-06	0.000184191	1.19282	1.19282	149.646	125.455
Rpl26	ENSMUSG00000060938	Rpl26	1.11963e-20	2.49297e-18	0.848628	-1.17837	1128.13	1329.36
Ndufa13	ENSMUSG00000036199	Ndufa13	2.93279e-08	1.61419e-06	0.865385	-1.15556	216.023	249.626
Wdr26	ENSMUSG00000038733	Wdr26	0.0478194	0.659377	1.06941	1.06941	136.805	127.926
Lsm14a	ENSMUSG00000066568	Lsm14a	0.0293236	0.438871	1.0746	1.0746	135.698	126.278
Scp2	ENSMUSG00000028603	Scp2	0.0347513	0.50401	0.933607	-1.07111	124.287	133.125
1110008P14Rik	ENSMUSG00000039195	.	0.024853	0.383138	0.910151	-1.09872	93.5164	102.748
Lcor	ENSMUSG00000025019	Lcor	3.68571e-07	1.67559e-05	1.20578	1.20578	172.437	143.009
Cwc15	ENSMUSG00000004096	Cwc15	0.00188596	0.0424266	0.908265	-1.101	127.057	139.89
Snrpd2	ENSMUSG00000040824	Snrpd2	0.00183564	0.0413895	0.899234	-1.11206	127.605	141.904
Chd6	ENSMUSG00000057133	Chd6	0.00140666	0.0327341	1.12486	1.12486	134.585	119.647
Cox6c	ENSMUSG00000014313	Cox6c	4.72888e-13	4.67968e-11	0.843793	-1.18513	313.104	371.068
Rnf216	ENSMUSG00000045078	Rnf216	7.72744e-05	0.00239575	1.14024	1.14024	171.065	150.025
Prpf39	ENSMUSG00000035597	Prpf39	0.0244026	0.377681	1.1045	1.1045	102.736	93.0161
Hint1	ENSMUSG00000020267	Hint1	0.000512642	0.0135009	0.911103	-1.09757	234.952	257.877
Nipbl	ENSMUSG00000022141	Nipbl	9.22809e-11	7.00834e-09	1.18989	1.18989	316.757	266.207
Rps7	ENSMUSG00000061477	Rps7	7.89138e-23	2.1778e-20	0.850303	-1.17605	3352.24	3942.4
Usp6nl	ENSMUSG00000039046	Usp6nl	0.00346035	0.0724381	1.12659	1.12659	126.537	112.319
Dennd5b	ENSMUSG00000030313	Dennd5b	0.0458763	0.636165	1.07501	1.07501	176.537	164.219
Hibadh	ENSMUSG00000029776	Hibadh	0.00561193	0.110402	1.1199	1.1199	114.385	102.139
Ube2k	ENSMUSG00000029203	Ube2k	9.38296e-06	0.000338582	1.15509	1.15509	160.755	139.171
Gimap3	ENSMUSG00000039264	Gimap3	0.0348671	0.505202	1.06986	1.06986	185.061	172.976
R3hdm2	ENSMUSG00000025404	R3hdm2	0.0054596	0.10773	1.1032	1.1032	134.405	121.833
Asxl2	ENSMUSG00000037486	Asxl2	0.00748101	0.14054	1.10487	1.10487	129.995	117.656
Akap9	ENSMUSG00000040407	Akap9	0.00823611	0.152532	1.10049	1.10049	134.124	121.877
Cux1	ENSMUSG00000029705	Cux1	2.8235e-06	0.000113211	1.18105	1.18105	175.668	148.739
Lpp	ENSMUSG00000033306	Lpp	0.0302274	0.44905	1.08688	1.08688	198.343	182.489
Emg1	ENSMUSG00000004268	Emg1	0.0331811	0.48384	0.933154	-1.07163	124.408	133.32
Zbtb20	ENSMUSG00000022708	Zbtb20	1.83155e-08	1.04934e-06	1.18962	1.18962	499.174	419.607
Srsf9	ENSMUSG00000029538	Srsf9	0.00418971	0.0855137	0.907853	-1.1015	108.513	119.527
Rac2	ENSMUSG00000033220	Rac2	3.47921e-14	3.87339e-12	0.876095	-1.14143	674.009	769.334
Rere	ENSMUSG00000039852	Rere	0.000235208	0.00658382	1.12304	1.12304	239.415	213.185
Suco	ENSMUSG00000040297	Suco	0.00218802	0.0481708	1.13005	1.13005	119.147	105.435
Ap3b1	ENSMUSG00000021686	Ap3b1	0.0330305	0.482777	1.07921	1.07921	129.091	119.616
Abhd17b	ENSMUSG00000047368	Abhd17b	3.26264e-12	2.90583e-10	1.1901	1.1901	375.209	315.276
Fndc3a	ENSMUSG00000033487	Fndc3a	1.44479e-10	1.07639e-08	1.29563	1.29563	162.611	125.507
Tnrc6a	ENSMUSG00000052707	Tnrc6a	0.000315307	0.00866497	1.13285	1.13285	147.217	129.952
Herc4	ENSMUSG00000020064	Herc4	1.94313e-13	1.99338e-11	1.26978	1.26978	253.234	199.431
Ndufb11	ENSMUSG00000031059	Ndufb11	8.84728e-07	3.82679e-05	0.868087	-1.15196	176.696	203.546
Ubxn1	ENSMUSG00000071655	Ubxn1	5.01732e-07	2.22924e-05	0.859136	-1.16396	138.996	161.786
Txndc16	ENSMUSG00000021830	Txndc16	2.73005e-10	1.93114e-08	1.25577	1.25577	189.578	150.966
Hnrnpr	ENSMUSG00000066037	Hnrnpr	0.0308314	0.455589	1.07284	1.07284	147.177	137.184
Csnk2b	ENSMUSG00000024387	Csnk2b	0.0493422	0.675147	0.93793	-1.06618	130.987	139.655
Git2	ENSMUSG00000041890	Git2	0.00503317	0.100495	1.09287	1.09287	156.15	142.881
Gpcpd1	ENSMUSG00000027346	Gpcpd1	2.59164e-05	0.000871023	1.14078	1.14078	229.588	201.256
Sppl3	ENSMUSG00000029550	Sppl3	0.0487334	0.669154	1.08096	1.08096	114.239	105.682
Herc1	ENSMUSG00000038664	Herc1	0.00621735	0.119786	1.10007	1.10007	154.027	140.016
Abracl	ENSMUSG00000078453	Abracl	0.00454905	0.0920361	0.909784	-1.09916	121.333	133.365
Trip11	ENSMUSG00000021188	Trip11	0.00612806	0.118522	1.11527	1.11527	115.964	103.978
Eif3i	ENSMUSG00000028798	Eif3i	0.0370517	0.531862	0.940331	-1.06346	172.713	183.673
Atp5o	ENSMUSG00000022956	Atp5o	0.0218366	0.344498	0.93007	-1.07519	140.946	151.543
Atp5l	ENSMUSG00000038717	Atp5l	1.53828e-11	1.25588e-09	0.84763	-1.17976	275.535	325.066
Rnasek	ENSMUSG00000093989	Rnasek	6.45999e-07	2.81909e-05	0.851991	-1.17372	123.096	144.48
Rbm33	ENSMUSG00000048271	Rbm33	0.000764557	0.01933	1.1234	1.1234	148.913	132.556
Hnrnpdl	ENSMUSG00000029328	Hnrnpdl	4.12754e-06	0.000160466	1.14267	1.14267	186.395	163.122
Mlxip	ENSMUSG00000038342	Mlxip	4.9411e-07	2.20036e-05	1.21165	1.21165	127.02	104.832
mt-Nd5	ENSMUSG00000064367	mt-Nd5	0.0186055	0.302788	0.957033	-1.0449	656.061	685.515
Gm11808	ENSMUSG00000068240	Gm11808	4.86052e-17	7.21493e-15	0.830534	-1.20404	403.516	485.852
Cuta	ENSMUSG00000024194	Cuta	0.0334452	0.486868	0.926335	-1.07952	106.607	115.084
Prdx5	ENSMUSG00000024953	Prdx5	0.00199257	0.0443159	0.896204	-1.11582	110.72	123.544
Map1lc3b	ENSMUSG00000031812	Map1lc3b	0.00734652	0.138278	0.910457	-1.09835	110.981	121.896
Pik3c2a	ENSMUSG00000030660	Pik3c2a	0.0147498	0.250378	1.13	1.13	99.3248	87.8977
Larp4b	ENSMUSG00000033499	Larp4b	0.0177474	0.290755	1.08717	1.08717	135.309	124.459
Rps19	ENSMUSG00000040952	Rps19	2.03744e-12	1.85682e-10	0.887192	-1.12715	1845.67	2080.35
Rps3a1	ENSMUSG00000028081	Rps3a1	1.98089e-22	5.17513e-20	0.862343	-1.15963	3288.76	3813.74
Rnf111	ENSMUSG00000032217	Rnf111	0.000423668	0.011403	1.13243	1.13243	166.046	146.628
Nedd8	ENSMUSG00000010376	Nedd8	0.00086406	0.0214853	0.910561	-1.09822	182.274	200.178
Tpp2	ENSMUSG00000041763	Tpp2	0.0305448	0.45272	1.08795	1.08795	116.338	106.933
Tnfrsf13c	ENSMUSG00000068105	Tnfrsf13c	1.84786e-13	1.9259e-11	0.820963	-1.21808	236.704	288.324
Bloc1s1	ENSMUSG00000090247	Bloc1s1	0.000877507	0.021792	0.876853	-1.14044	97.112	110.751
Zfp608	ENSMUSG00000052713	Zfp608	6.48608e-06	0.000242535	1.18332	1.18332	172.488	145.766
Rps18	ENSMUSG00000008668	Rps18	2.72286e-11	2.17762e-09	0.884898	-1.13007	1161.66	1312.76
Tasor2	ENSMUSG00000033799	Tasor2	3.25299e-08	1.77053e-06	1.21713	1.21713	150.424	123.589
Susd6	ENSMUSG00000021133	Susd6	2.79708e-11	2.20992e-09	1.25515	1.25515	206.234	164.311
Esco1	ENSMUSG00000024293	Esco1	0.000500501	0.0132574	1.13256	1.13256	129.473	114.32
Peli1	ENSMUSG00000020134	Peli1	0.00722073	0.136435	1.10704	1.10704	136.474	123.278
Jak2	ENSMUSG00000024789	Jak2	0.0326444	0.478768	1.09124	1.09124	111.903	102.548
Mtmr3	ENSMUSG00000034354	Mtmr3	7.18566e-05	0.00224555	1.15719	1.15719	143.802	124.268
Rps3	ENSMUSG00000030744	Rps3	1.3045e-19	2.66254e-17	0.86648	-1.1541	2031.17	2344.16
Ndufa4	ENSMUSG00000029632	Ndufa4	3.39665e-08	1.83563e-06	0.873696	-1.14456	275.897	315.781
Dennd1a	ENSMUSG00000035392	Dennd1a	2e-09	1.31946e-07	1.25223	1.25223	192.482	153.712
Ppia	ENSMUSG00000071866	Ppia	4.02047e-06	0.000156615	0.926954	-1.0788	1554.62	1677.13
Psmb8	ENSMUSG00000024338	Psmb8	2.68203e-05	0.000899858	0.916159	-1.09151	402.169	438.973
Thrap3	ENSMUSG00000043962	Thrap3	0.00329869	0.0694886	1.09217	1.09217	177.891	162.878
Rpl13	ENSMUSG00000000740	Rpl13	1.37518e-14	1.59439e-12	0.890244	-1.12329	4563.31	5125.91
Ldb1	ENSMUSG00000025223	Ldb1	0.0268513	0.408165	0.920164	-1.08676	98.0814	106.591
Rnf13	ENSMUSG00000036503	Rnf13	0.0149493	0.252951	1.09594	1.09594	118.868	108.461
Rasa2	ENSMUSG00000032413	Rasa2	0.00193909	0.0433728	1.11853	1.11853	134.968	120.666
Wnk1	ENSMUSG00000045962	Wnk1	1.69386e-05	0.000589511	1.13739	1.13739	227.364	199.9
Ndufb5	ENSMUSG00000027673	Ndufb5	0.000168652	0.00487399	0.882514	-1.13313	124.385	140.944
Itpkb	ENSMUSG00000038855	Itpkb	0.00209527	0.0463142	1.12285	1.12285	133.549	118.938
Vamp8	ENSMUSG00000050732	Vamp8	0.00132537	0.0310268	0.899934	-1.11119	123.554	137.292
Vps13a	ENSMUSG00000046230	Vps13a	1.70507e-05	0.00059236	1.1541	1.1541	177.073	153.43
5031425E22Rik	ENSMUSG00000073147	5031425E22Rik	0.026213	0.400326	1.08904	1.08904	120.525	110.671
Matr3	ENSMUSG00000037236	Matr3	0.00185133	0.0416954	1.11615	1.11615	130.736	117.131
Galnt11	ENSMUSG00000038072	Galnt11	0.0276011	0.416654	1.11104	1.11104	100.071	90.0695
Rplp2	ENSMUSG00000025508	Rplp2	1.03633e-16	1.47143e-14	0.869566	-1.15	1716.77	1974.28
Hs3st1	ENSMUSG00000051022	Hs3st1	0.00167462	0.0383773	1.16706	1.16706	105.911	90.7508
Map3k2	ENSMUSG00000024383	Map3k2	0.0367686	0.528961	1.08176	1.08176	115.585	106.849
Agps	ENSMUSG00000042410	Agps	0.0445334	0.620176	1.09717	1.09717	100.475	91.5759
Pdss2	ENSMUSG00000038240	Pdss2	0.0220943	0.347445	1.12675	1.12675	99.5511	88.3527
Cog5	ENSMUSG00000035933	Cog5	0.000125099	0.00371392	1.15604	1.15604	144.061	124.617
Tmem256	ENSMUSG00000070394	Tmem256	0.0308043	0.455531	0.894355	-1.11812	85.5242	95.6266
Peak1	ENSMUSG00000074305	Peak1	0.0317114	0.467886	1.1105	1.1105	105.052	94.599
Commd4	ENSMUSG00000032299	Commd4	0.00783758	0.146957	0.906696	-1.10291	104.219	114.944
Ube2h	ENSMUSG00000039159	Ube2h	0.0464195	0.642787	1.07614	1.07614	145.306	135.026
Tbrg1	ENSMUSG00000011114	Tbrg1	0.0350298	0.506923	0.915039	-1.09285	92.5974	101.195
Arhgap25	ENSMUSG00000030047	Arhgap25	0.00425529	0.0867619	1.10073	1.10073	156.823	142.472
Rpl18	ENSMUSG00000059070	Rpl18	1.18902e-20	2.61771e-18	0.861613	-1.16061	2715.16	3151.25
Atad2b	ENSMUSG00000052812	Atad2b	0.000922442	0.0227636	1.12104	1.12104	157.201	140.227
Vps13b	ENSMUSG00000037646	Vps13b	7.31262e-09	4.49348e-07	1.21585	1.21585	244.298	200.927
Man2a1	ENSMUSG00000024085	Man2a1	2.2301e-08	1.25205e-06	1.23225	1.23225	171.93	139.525
Mrps36	ENSMUSG00000061474	Mrps36	0.0235715	0.367138	0.900865	-1.11004	86.599	96.1287
Rassf2	ENSMUSG00000027339	Rassf2	0.0206303	0.330253	1.08312	1.08312	129.19	119.275
Dock8	ENSMUSG00000052085	Dock8	5.55554e-07	2.44618e-05	1.14986	1.14986	339.753	295.473
B3gnt5	ENSMUSG00000022686	B3gnt5	0.0160012	0.267744	1.08813	1.08813	156.564	143.884
Mast4	ENSMUSG00000034751	Mast4	0.031684	0.467835	1.08315	1.08315	159.427	147.188
Gabarap	ENSMUSG00000018567	Gabarap	3.24785e-07	1.49036e-05	0.880514	-1.1357	252.409	286.662
Rps15a	ENSMUSG00000008683	Rps15a	1.51276e-25	6.58689e-23	0.833008	-1.20047	2848.89	3420.01
H2-T22	ENSMUSG00000056116	H2-T22	0.0429044	0.601336	0.934398	-1.07021	120.533	128.995
Gng5	ENSMUSG00000068523	Gng5	7.88297e-16	1.05074e-13	0.828443	-1.20708	287.474	347.005
Cnot1	ENSMUSG00000036550	Cnot1	0.00881044	0.161037	1.09726	1.09726	137.786	125.573
Pfn1	ENSMUSG00000018293	Pfn1	4.09023e-15	5.0724e-13	0.879614	-1.13686	1573.89	1789.29
Slf2	ENSMUSG00000036097	Slf2	0.0477366	0.658698	1.09446	1.09446	99.8746	91.2549
Snrpf	ENSMUSG00000020018	Snrpf	0.0292534	0.438219	0.934416	-1.07019	164.507	176.054
Usp3	ENSMUSG00000032376	Usp3	0.00264198	0.057138	1.11927	1.11927	132.636	118.503
Ndufv3	ENSMUSG00000024038	Ndufv3	0.000935497	0.0230568	0.889938	-1.12367	110.964	124.687
Trim26	ENSMUSG00000024457	Trim26	0.0264321	0.403357	1.08116	1.08116	118.497	109.601
Blnk	ENSMUSG00000061132	Blnk	8.50896e-16	1.12502e-13	1.18196	1.18196	731.953	619.27
Hnrnpk	ENSMUSG00000021546	Hnrnpk	0.00785214	0.147089	0.944495	-1.05877	318.924	337.667
Igkv8-27	ENSMUSG00000076580	Igkv8-27	0.00147128	0.0340358	0.805431	-1.24157	131.659	163.464
Wdr33	ENSMUSG00000024400	Wdr33	0.0108256	0.19196	1.08307	1.08307	156.94	144.903
Dleu2	ENSMUSG00000097589	Dleu2	3.05881e-05	0.0010073	1.17322	1.17322	189.945	161.901
U2surp	ENSMUSG00000032407	U2surp	0.0173119	0.28505	1.08213	1.08213	134.559	124.346
Huwe1	ENSMUSG00000025261	Huwe1	5.52667e-07	2.43896e-05	1.17568	1.17568	221.531	188.429
2023-09-01	ENSMUSG00000000486	.	0.00110053	0.0265563	0.912885	-1.09543	187.819	205.742
Haao	ENSMUSG00000000673	Haao	0.0138808	0.238579	1.08798	1.08798	136.098	125.092
Rpl34	ENSMUSG00000062006	Rpl34	1.41428e-26	7.29246e-24	0.83741	-1.19416	2631.25	3142.13
Sri	ENSMUSG00000003161	Sri	0.00116819	0.0278801	0.911206	-1.09745	176.543	193.746
Ndufb9	ENSMUSG00000022354	Ndufb9	0.0259717	0.39726	0.931958	-1.07301	131.943	141.576
Cfl1	ENSMUSG00000056201	Cfl1	6.62462e-07	2.88451e-05	0.909422	-1.0996	641.149	705.007
Nup153	ENSMUSG00000021374	Nup153	0.035915	0.518584	1.09099	1.09099	107.64	98.6621
Rif1	ENSMUSG00000036202	Rif1	0.0433546	0.60654	1.08937	1.08937	108.997	100.055
Trappc9	ENSMUSG00000047921	Trappc9	0.00615221	0.118648	1.12945	1.12945	113.105	100.141
Rpl9	ENSMUSG00000047215	Rpl9	1.46041e-22	3.97433e-20	0.854104	-1.17082	2998.29	3510.45
Eif3f	ENSMUSG00000031029	Eif3f	2.86502e-10	2.01209e-08	0.893327	-1.11941	594.571	665.569
Mrpl18	ENSMUSG00000057388	Mrpl18	0.0283354	0.426752	0.919149	-1.08796	96.9355	105.462
Cd53	ENSMUSG00000040747	Cd53	0.035449	0.512478	0.951882	-1.05055	289.333	303.959
Lyst	ENSMUSG00000019726	Lyst	3.63347e-09	2.33424e-07	1.23702	1.23702	247.128	199.778
Mdm4	ENSMUSG00000054387	Mdm4	2.13742e-05	0.000729627	1.14644	1.14644	175.134	152.763
Ythdc1	ENSMUSG00000035851	Ythdc1	0.0134029	0.230974	1.07214	1.07214	204.298	190.551
Ankib1	ENSMUSG00000040351	Ankib1	0.0129291	0.22399	1.1046	1.1046	124.756	112.942
Ifi206	ENSMUSG00000037849	Ifi206	0.000880206	0.0218313	1.15502	1.15502	119.287	103.277
Syk	ENSMUSG00000021457	Syk	2.23836e-05	0.000760111	1.09561	1.09561	620.285	566.153
Sf3b3	ENSMUSG00000033732	Sf3b3	0.00883097	0.161262	1.08676	1.08676	144.325	132.803
Anp32a	ENSMUSG00000032249	Anp32a	0.0082456	0.152563	0.930928	-1.0742	203.713	218.828
Pan3	ENSMUSG00000029647	Pan3	2.4948e-10	1.77113e-08	1.22863	1.22863	253.624	206.428
Snrpg	ENSMUSG00000057278	Snrpg	5.95439e-10	4.05105e-08	0.876781	-1.14054	408.962	466.436
Phf20	ENSMUSG00000038116	Phf20	0.0166857	0.276301	1.10099	1.10099	111.788	101.534
Rpl36al	ENSMUSG00000049751	Rpl36al	9.89604e-19	1.86445e-16	0.842996	-1.18625	569.369	675.411
Rpl30	ENSMUSG00000058600	Rpl30	1.87996e-22	4.97782e-20	0.846104	-1.18189	3077.33	3637.06
Relch	ENSMUSG00000026319	Relch	0.0209417	0.333654	1.10285	1.10285	110.885	100.544
Bola2	ENSMUSG00000047721	Bola2	0.015675	0.262734	0.916918	-1.09061	125.318	136.673
Creb1	ENSMUSG00000025958	Creb1	0.000249617	0.00696723	1.1388	1.1388	149.675	131.432
Lamtor4	ENSMUSG00000050552	Lamtor4	0.000431099	0.0115712	0.88046	-1.13577	101.642	115.442
Esd	ENSMUSG00000021996	Esd	0.0160753	0.268753	0.91888	-1.08828	108.734	118.333
Rabgap1l	ENSMUSG00000026721	Rabgap1l	1.31216e-06	5.57719e-05	1.15363	1.15363	368.382	319.323
Mrps33	ENSMUSG00000029918	Mrps33	0.00298507	0.0639229	0.898081	-1.11349	108.247	120.531
Pet100	ENSMUSG00000087687	Pet100	0.0273274	0.414117	0.914668	-1.09329	96.4925	105.494
Rpl35a	ENSMUSG00000060636	Rpl35a	7.26916e-26	3.39124e-23	0.838627	-1.19242	2883.01	3437.77
Psmb10	ENSMUSG00000031897	Psmb10	0.0121773	0.213038	0.919862	-1.08712	125.861	136.826
Cd19	ENSMUSG00000030724	Cd19	0.00115835	0.0277128	0.938604	-1.06541	402.1	428.403
Rpl37a	ENSMUSG00000046330	Rpl37a	2.57982e-20	5.49446e-18	0.853509	-1.17163	2221.83	2603.17
Mkln1	ENSMUSG00000025609	Mkln1	0.00127553	0.0299672	1.13198	1.13198	122.44	108.164
Rpl10	ENSMUSG00000008682	Rpl10	1.74461e-14	1.99905e-12	0.880285	-1.136	1331.84	1512.97
Rabep1	ENSMUSG00000020817	Rabep1	0.000346439	0.00944107	1.1299	1.1299	153.604	135.944
Zup1	ENSMUSG00000039531	Zup1	9.14338e-14	9.78992e-12	1.29081	1.29081	207.33	160.62
Arid2	ENSMUSG00000033237	Arid2	0.0293417	0.438871	1.10169	1.10169	108.639	98.6112
Ppdpf	ENSMUSG00000016344	Ppdpf	6.28043e-09	3.91907e-07	0.852463	-1.17307	209.546	245.812
Nktr	ENSMUSG00000032525	Nktr	0.00804834	0.149478	1.09115	1.09115	159.668	146.331
Cdc42se2	ENSMUSG00000052298	Cdc42se2	0.000559563	0.0145475	1.10902	1.10902	210.464	189.775
Gas5	ENSMUSG00000053332	Gas5	0.00191028	0.0429244	0.931029	-1.07408	335.401	360.248
Smad2	ENSMUSG00000024563	Smad2	0.0413906	0.583571	1.07914	1.07914	117.707	109.075
Atp6v1f	ENSMUSG00000004285	Atp6v1f	1.31679e-08	7.71356e-07	0.850197	-1.1762	176.297	207.36
Fam107b	ENSMUSG00000026655	Fam107b	1.45111e-10	1.07701e-08	1.20171	1.20171	326.562	271.748
Zfas1	ENSMUSG00000074578	Zfas1	0.0251503	0.386204	0.909601	-1.09938	98.4158	108.197
Runx1	ENSMUSG00000022952	Runx1	2.83707e-12	2.53834e-10	1.23647	1.23647	416.016	336.455
Rnase6	ENSMUSG00000021880	Rnase6	0.000205404	0.00583154	0.884277	-1.13087	127.205	143.853
Xist	ENSMUSG00000086503	Xist	0.0266426	0.406253	1.10599	1.10599	286.503	259.047
Mef2c	ENSMUSG00000005583	Mef2c	3.43636e-33	4.58699e-30	1.2804	1.2804	1426.55	1114.15
Fto	ENSMUSG00000055932	Fto	0.000574226	0.0148828	1.14857	1.14857	130.485	113.606
Prdm2	ENSMUSG00000057637	Prdm2	0.0100588	0.180322	1.09577	1.09577	130.876	119.437
Fryl	ENSMUSG00000070733	Fryl	1.3295e-14	1.55061e-12	1.30708	1.30708	179.37	137.23
Rps6ka3	ENSMUSG00000031309	Rps6ka3	1.58117e-06	6.61995e-05	1.20539	1.20539	167.569	139.017
Mbd5	ENSMUSG00000036792	Mbd5	0.00107098	0.0259071	1.14394	1.14394	147.832	129.231
Sell	ENSMUSG00000026581	Sell	0.00207741	0.0459942	1.09134	1.09134	278.78	255.446
Pikfyve	ENSMUSG00000025949	Pikfyve	0.0236502	0.36778	1.10887	1.10887	107.435	96.8864
Nop58	ENSMUSG00000026020	Nop58	0.0156405	0.262381	1.10248	1.10248	117.54	106.615
Sipa1l1	ENSMUSG00000042700	Sipa1l1	4.39007e-09	2.79282e-07	1.27128	1.27128	142.78	112.311
Snx5	ENSMUSG00000027423	Snx5	0.00503654	0.100495	1.06849	1.06849	329.441	308.323
Usp15	ENSMUSG00000020124	Usp15	1.76256e-08	1.01278e-06	1.20741	1.20741	195.968	162.305
Clasp1	ENSMUSG00000064302	Clasp1	0.000654738	0.0167044	1.14426	1.14426	122.439	107.003
Ep400	ENSMUSG00000029505	Ep400	0.00787416	0.147117	1.09029	1.09029	143.962	132.04
Cyp4f18	ENSMUSG00000003484	Cyp4f18	0.00199532	0.0443269	0.892916	-1.11993	116.98	131.009
Atp5d	ENSMUSG00000003072	Atp5d	0.000883161	0.0218769	0.924911	-1.08118	298.057	322.254
Rps8	ENSMUSG00000047675	Rps8	6.02379e-25	2.3606e-22	0.854611	-1.17012	5064.05	5925.56
Paxbp1	ENSMUSG00000022974	Paxbp1	0.0367392	0.528926	1.09335	1.09335	102.531	93.7767
Gmds	ENSMUSG00000038372	Gmds	0.00125537	0.0296001	1.18041	1.18041	117.992	99.9581
St8sia4	ENSMUSG00000040710	St8sia4	3.73213e-11	2.91344e-09	1.28778	1.28778	217.158	168.63
Cd180	ENSMUSG00000021624	Cd180	0.00705267	0.133713	1.08454	1.08454	252	232.358
Ndufc1	ENSMUSG00000037152	Ndufc1	0.000374348	0.0101592	0.87636	-1.14108	110.514	126.105
Pias1	ENSMUSG00000032405	Pias1	0.000936883	0.0230619	1.11549	1.11549	155.174	139.108
Sec24b	ENSMUSG00000001052	Sec24b	0.00578308	0.113241	1.11747	1.11747	112.16	100.369
Lims1	ENSMUSG00000019920	Lims1	0.0298281	0.444113	1.08081	1.08081	146.487	135.535
Cab39l	ENSMUSG00000021981	Cab39l	0.000271832	0.00753465	1.13712	1.13712	152.629	134.224
Fis1	ENSMUSG00000019054	Fis1	4.12278e-05	0.00132212	0.898719	-1.1127	230.898	256.92
Tmem14c	ENSMUSG00000021361	Tmem14c	0.0022649	0.0497517	0.896179	-1.11585	104.001	116.05
Coro1b	ENSMUSG00000024835	Coro1b	0.0142239	0.242984	0.910445	-1.09836	99.3424	109.114
Utrn	ENSMUSG00000019820	Utrn	1.44139e-06	6.08677e-05	1.23	1.23	156.626	127.339
Fip1l1	ENSMUSG00000029227	Fip1l1	0.0291214	0.436576	1.07357	1.07357	135.859	126.548
Cdkal1	ENSMUSG00000006191	Cdkal1	1.49033e-05	0.00052239	1.19276	1.19276	137.209	115.035
Taf15	ENSMUSG00000020680	Taf15	0.0191941	0.310334	1.07651	1.07651	160.323	148.928
Marcks	ENSMUSG00000069662	Marcks	0.0427782	0.600427	0.919203	-1.0879	120.96	131.593
Tmem179b	ENSMUSG00000118346	Tmem179b	0.00533457	0.105368	0.916651	-1.09093	135.006	147.282
Cpsf6	ENSMUSG00000055531	Cpsf6	0.00967401	0.173901	1.08756	1.08756	146.348	134.565
Ascc3	ENSMUSG00000038774	Ascc3	2.78647e-11	2.20992e-09	1.27022	1.27022	187.578	147.674
1110059E24Rik	ENSMUSG00000035171	1110059E24Rik	8.78067e-06	0.000319179	1.16408	1.16408	166.452	142.99
Eif1b	ENSMUSG00000006941	Eif1b	0.029426	0.439605	0.914329	-1.0937	95.7115	104.679
Papola	ENSMUSG00000021111	Papola	0.000673712	0.0171661	1.1067	1.1067	177.93	160.776
Atp5k	ENSMUSG00000050856	Atp5k	0.0089869	0.163348	0.919607	-1.08742	137.077	149.06
Bcas3	ENSMUSG00000059439	Bcas3	0.00401477	0.0824585	1.14217	1.14217	125.197	109.613
Kdm3b	ENSMUSG00000038773	Kdm3b	0.00233108	0.0509768	1.10777	1.10777	147.246	132.921
Slc25a5	ENSMUSG00000016319	Slc25a5	0.0200595	0.322434	0.939327	-1.06459	238.088	253.467
Hmgb1	ENSMUSG00000066551	Hmgb1	0.0120514	0.211591	0.947873	-1.05499	396.463	418.266
Tnfaip8l2	ENSMUSG00000013707	Tnfaip8l2	0.039707	0.5646	0.913919	-1.09419	90.4774	98.9994
Fam104a	ENSMUSG00000041629	Fam104a	0.0483682	0.666006	0.934355	-1.07026	108.077	115.67
Aim2	ENSMUSG00000037860	Aim2	0.0453155	0.628833	1.07178	1.07178	132.097	123.25
Ptk2b	ENSMUSG00000059456	Ptk2b	0.00826244	0.152731	1.07394	1.07394	289.105	269.2
Pgls	ENSMUSG00000031807	Pgls	8.39409e-08	4.24997e-06	0.856162	-1.168	182.003	212.58
Fcrl1	ENSMUSG00000059994	Fcrl1	0.00336026	0.0705691	1.07678	1.07678	291.783	270.978
Ndufa6	ENSMUSG00000022450	Ndufa6	2.63535e-06	0.000106249	0.872464	-1.14618	165.654	189.869
Atp9b	ENSMUSG00000024566	Atp9b	0.0084752	0.156074	1.10628	1.10628	127.958	115.665
Mta3	ENSMUSG00000055817	Mta3	0.000678437	0.017264	1.11968	1.11968	158.265	141.349
Rpl38	ENSMUSG00000057322	Rpl38	4.80426e-24	1.5955e-21	0.844652	-1.18392	2793.25	3306.98
Fcho2	ENSMUSG00000041685	Fcho2	0.0151098	0.255005	1.11475	1.11475	105.951	95.0439
Zfp280d	ENSMUSG00000038535	Zfp280d	1.08158e-07	5.3925e-06	1.21731	1.21731	152.819	125.538
Foxn2	ENSMUSG00000034998	Foxn2	0.00407262	0.0834717	1.15249	1.15249	102.848	89.2397
Rps23	ENSMUSG00000049517	Rps23	3.95026e-17	6.00011e-15	0.867607	-1.1526	1289.93	1486.76
Brd8	ENSMUSG00000003778	Brd8	0.0257216	0.39405	1.08749	1.08749	116.962	107.553
Caprin1	ENSMUSG00000027184	Caprin1	0.000502623	0.0132907	1.11432	1.11432	171.751	154.131
Rictor	ENSMUSG00000050310	Rictor	0.0187443	0.304541	1.12017	1.12017	100.005	89.2768
Scd1	ENSMUSG00000037071	Scd1	2.90326e-05	0.000964178	1.12094	1.12094	236.596	211.07
Fbxl17	ENSMUSG00000023965	Fbxl17	5.72436e-07	2.50924e-05	1.21606	1.21606	208.947	171.823
Cab39	ENSMUSG00000036707	Cab39	0.0170983	0.282245	1.08493	1.08493	128.31	118.265
Pomp	ENSMUSG00000029649	Pomp	0.00943956	0.170469	0.920832	-1.08597	141.442	153.602
Pmf1	ENSMUSG00000028066	Pmf1	0.000127858	0.00377865	0.869578	-1.14998	123.716	142.271
Rbm6	ENSMUSG00000032582	Rbm6	5.82032e-07	2.54561e-05	1.18429	1.18429	169.221	142.888
Ube2w	ENSMUSG00000025939	Ube2w	0.0372266	0.533664	1.07518	1.07518	138.551	128.863
Cd81	ENSMUSG00000037706	Cd81	4.6611e-05	0.00148503	0.895605	-1.11656	221.435	247.247
Strn3	ENSMUSG00000020954	Strn3	7.08733e-09	4.3946e-07	1.22528	1.22528	179.154	146.215
Rpl11	ENSMUSG00000059291	Rpl11	1.79545e-18	3.28786e-16	0.870632	-1.14859	2267.98	2604.98
Psmb1	ENSMUSG00000014769	Psmb1	1.22256e-05	0.000435544	0.890013	-1.12358	194.758	218.827
Naa38	ENSMUSG00000059278	Naa38	0.000940683	0.0231264	0.866457	-1.15412	90.0303	103.906
Tmcc1	ENSMUSG00000030126	Tmcc1	0.0133918	0.230974	1.10521	1.10521	141.146	127.71
Bptf	ENSMUSG00000040481	Bptf	0.014992	0.253454	1.0671	1.0671	257.545	241.352
Actr3	ENSMUSG00000026341	Actr3	3.82828e-06	0.000149723	1.07425	1.07425	798.407	743.226
Fau	ENSMUSG00000038274	Fau	9.654e-39	2.70229e-35	0.809806	-1.23486	6477.21	7998.47
Arid5b	ENSMUSG00000019947	Arid5b	0.00275655	0.059419	1.11192	1.11192	224.692	202.077
Kmt2a	ENSMUSG00000002028	Kmt2a	0.0395164	0.562299	1.06252	1.06252	230.247	216.698
Tcerg1	ENSMUSG00000024498	Tcerg1	0.0346461	0.502856	1.08719	1.08719	115.748	106.465
Rps13	ENSMUSG00000090862	Rps13	5.31777e-24	1.70814e-21	0.847899	-1.17939	2629.03	3100.64
Ifi209	ENSMUSG00000043263	Ifi209	1.85336e-05	0.000638221	1.12787	1.12787	264.265	234.304
Cd48	ENSMUSG00000015355	Cd48	0.00141295	0.0328414	0.907483	-1.10195	141.601	156.038
Man2b1	ENSMUSG00000005142	Man2b1	0.0123262	0.215067	0.921293	-1.08543	122.324	132.775
Cycs	ENSMUSG00000063694	Cycs	0.00702555	0.13339	0.912676	-1.09568	125.467	137.471
Rps24	ENSMUSG00000025290	Rps24	1.1066e-23	3.4417e-21	0.848926	-1.17796	6557.65	7724.64
Ppp1r16b	ENSMUSG00000037754	Ppp1r16b	2.49587e-12	2.24331e-10	1.26281	1.26281	227.512	180.163
Mdh1	ENSMUSG00000020321	Mdh1	0.00343906	0.0721467	0.917835	-1.08952	167.22	182.19
Epc1	ENSMUSG00000024240	Epc1	0.000973478	0.0237892	1.11645	1.11645	147.588	132.194
Oaz1	ENSMUSG00000035242	Oaz1	6.94348e-21	1.60059e-18	0.850272	-1.17609	692.484	814.427
Rps15	ENSMUSG00000063457	Rps15	3.62854e-08	1.94256e-06	0.901529	-1.10923	704.801	781.784
Il2rg	ENSMUSG00000031304	Il2rg	0.00947856	0.171016	1.05381	1.05381	429.202	407.287
Rpl31	ENSMUSG00000073702	Rpl31	9.97922e-13	9.31109e-11	0.866003	-1.15473	510.492	589.481
Trps1	ENSMUSG00000038679	Trps1	0.00613645	0.118522	1.14973	1.14973	156.659	136.257
Stat5b	ENSMUSG00000020919	Stat5b	0.0125252	0.217956	1.10973	1.10973	113.134	101.947
Csde1	ENSMUSG00000068823	Csde1	0.0218789	0.344888	1.07204	1.07204	156.519	146.001
Cops9	ENSMUSG00000073616	Cops9	0.00481572	0.0966796	0.900551	-1.11043	102.857	114.215
Stim1	ENSMUSG00000030987	Stim1	0.027376	0.41413	1.09435	1.09435	120.348	109.972
H2afj	ENSMUSG00000060032	.	5.91259e-08	3.05676e-06	0.860624	-1.16195	210.461	244.545
Mgat5	ENSMUSG00000036155	Mgat5	0.00849738	0.15623	1.13716	1.13716	108.471	95.3873
Gigyf2	ENSMUSG00000048000	Gigyf2	0.00699068	0.132857	1.11377	1.11377	116.146	104.282
Clint1	ENSMUSG00000006169	Clint1	0.000614055	0.0157898	1.10427	1.10427	223.636	202.519
Mycbp2	ENSMUSG00000033004	Mycbp2	1.70278e-08	9.81301e-07	1.15298	1.15298	507.355	440.036
Cr2	ENSMUSG00000026616	Cr2	3.20896e-05	0.0010462	1.13348	1.13348	805.817	710.926
Ptbp2	ENSMUSG00000028134	Ptbp2	0.0165139	0.273983	1.12497	1.12497	99.1771	88.1598
Ubr2	ENSMUSG00000023977	Ubr2	0.0278254	0.419715	1.08335	1.08335	125.69	116.02
Rfc2	ENSMUSG00000023104	Rfc2	0.0435835	0.608677	0.921307	-1.08541	96.7456	105.009
Arfgef1	ENSMUSG00000067851	Arfgef1	1.80449e-06	7.44361e-05	1.17462	1.17462	179.873	153.133
Fnbp1	ENSMUSG00000075415	Fnbp1	1.31218e-06	5.57719e-05	1.16039	1.16039	247.967	213.694
Hcst	ENSMUSG00000064109	Hcst	0.0328168	0.480936	0.902063	-1.10857	90.0384	99.8139
Calm1	ENSMUSG00000001175	Calm1	5.40556e-10	3.71637e-08	0.889259	-1.12453	687.983	773.659
Pik3ap1	ENSMUSG00000025017	Pik3ap1	1.41658e-17	2.31303e-15	1.30272	1.30272	277.726	213.189
Krtcap2	ENSMUSG00000042747	Krtcap2	9.28221e-05	0.00281541	0.88825	-1.12581	165.153	185.931
Aftph	ENSMUSG00000049659	Aftph	0.0202723	0.325053	1.08752	1.08752	126.144	115.992
Cdk19	ENSMUSG00000038481	Cdk19	0.0141422	0.242011	1.09923	1.09923	131.112	119.276
Tmem131l	ENSMUSG00000033767	Tmem131l	9.22003e-11	7.00834e-09	1.21746	1.21746	408.771	335.758
Crebbp	ENSMUSG00000022521	Crebbp	9.01583e-05	0.00275165	1.12765	1.12765	199.397	176.825
Mbnl2	ENSMUSG00000022139	Mbnl2	0.00182899	0.0412871	1.10869	1.10869	198.696	179.217
Rps21	ENSMUSG00000039001	Rps21	3.61671e-26	1.72843e-23	0.83478	-1.19792	2834.68	3395.72
Ggnbp2	ENSMUSG00000020530	Ggnbp2	0.00657607	0.125955	1.08425	1.08425	178.363	164.504
Iglc1	ENSMUSG00000105906	Iglc1	3.50352e-19	6.7302e-17	0.702675	-1.42313	169.476	241.186
Mrps16	ENSMUSG00000049960	Mrps16	0.034406	0.500112	0.929018	-1.07641	118.054	127.074
Zdhhc14	ENSMUSG00000034265	Zdhhc14	0.000149928	0.00439117	1.19567	1.19567	148.043	123.816
Med28	ENSMUSG00000015804	Med28	0.00673542	0.128629	0.916323	-1.09132	119.688	130.618
Rps2	ENSMUSG00000044533	Rps2	0.0238685	0.370587	0.966189	-1.03499	2576.94	2667.12
Fermt3	ENSMUSG00000024965	Fermt3	0.00488152	0.0978	0.920179	-1.08674	161.47	175.477
Tec	ENSMUSG00000029217	Tec	5.19961e-11	4.01107e-09	1.23107	1.23107	251.838	204.568
Rpl23	ENSMUSG00000071415	Rpl23	2.31405e-17	3.62733e-15	0.875295	-1.14247	3163.93	3614.7
Far1	ENSMUSG00000030759	Far1	9.1572e-05	0.00278612	1.13824	1.13824	171.528	150.696
Rhog	ENSMUSG00000073982	Rhog	0.000183903	0.00529133	0.89136	-1.12188	144.139	161.706
Ikbkb	ENSMUSG00000031537	Ikbkb	0.00530526	0.105001	1.09501	1.09501	147.254	134.476
Rbm5	ENSMUSG00000032580	Rbm5	0.0285709	0.429637	1.06623	1.06623	186.838	175.232
Nrf1	ENSMUSG00000058440	Nrf1	0.00592592	0.115191	1.11875	1.11875	116.077	103.756
Dmxl1	ENSMUSG00000037416	Dmxl1	6.88564e-15	8.37996e-13	1.27155	1.27155	361.986	284.68
Hdac8	ENSMUSG00000067567	Hdac8	0.0491504	0.673464	1.09931	1.09931	114.863	104.487
Rpl32	ENSMUSG00000057841	Rpl32	2.3028e-20	4.95836e-18	0.851966	-1.17376	2307.26	2708.16
Cul1	ENSMUSG00000029686	Cul1	0.0302285	0.44905	1.07887	1.07887	127.364	118.053
Fars2	ENSMUSG00000021420	Fars2	0.00879683	0.160938	1.11883	1.11883	124.218	111.025
Purb	ENSMUSG00000094483	Purb	0.0448599	0.623393	0.949619	-1.05305	218.788	230.396
Ndufb3	ENSMUSG00000026032	Ndufb3	0.0208186	0.332453	0.917337	-1.09011	101.463	110.606
Romo1	ENSMUSG00000067847	Romo1	7.61256e-05	0.00236387	0.874112	-1.14402	125.985	144.129
Ppp1r11	ENSMUSG00000036398	Ppp1r11	0.0102489	0.183228	0.921843	-1.08478	135.397	146.876
Churc1	ENSMUSG00000090258	Churc1	0.0248837	0.383311	0.909873	-1.09905	93.8003	103.092
Zfp106	ENSMUSG00000027288	Zfp106	0.00454594	0.0920361	1.09489	1.09489	165.645	151.289
Mrps24	ENSMUSG00000020477	Mrps24	0.0270459	0.410804	0.929851	-1.07544	118.995	127.972
Gnaq	ENSMUSG00000024639	Gnaq	2.91419e-06	0.00011585	1.217	1.217	141.602	116.353
Atp6v1g1	ENSMUSG00000039105	Atp6v1g1	0.00391358	0.0805491	0.905248	-1.10467	111.269	122.915
Grb2	ENSMUSG00000059923	Grb2	7.79035e-08	3.95451e-06	1.11303	1.11303	497.711	447.166
Ankrd28	ENSMUSG00000014496	Ankrd28	0.0480754	0.662439	1.11885	1.11885	95.2938	85.1716
Sh3glb1	ENSMUSG00000037062	Sh3glb1	0.0164151	0.273037	0.939522	-1.06437	217.975	232.006
Cnp	ENSMUSG00000006782	Cnp	0.00111235	0.0266968	0.902914	-1.10753	144.204	159.71
Cyth1	ENSMUSG00000017132	Cyth1	7.99359e-17	1.16885e-14	1.26751	1.26751	324.033	255.645
Trim12c	ENSMUSG00000057143	Trim12c	0.0240952	0.373218	1.09218	1.09218	111.027	101.656
Mrpl30	ENSMUSG00000026087	Mrpl30	0.0444812	0.61989	0.934379	-1.07023	131.78	141.035
Cox6a1	ENSMUSG00000041697	Cox6a1	0.00578721	0.113241	0.926326	-1.07953	195.168	210.691
Eif4g3	ENSMUSG00000028760	Eif4g3	2.48138e-08	1.37734e-06	1.18437	1.18437	241.383	203.808
Naa15	ENSMUSG00000063273	Naa15	0.0141256	0.241939	1.09722	1.09722	119.317	108.745
Csnk2a1	ENSMUSG00000074698	Csnk2a1	0.00449485	0.0913611	1.08817	1.08817	170.056	156.277
Tm9sf3	ENSMUSG00000025016	Tm9sf3	0.00211487	0.0466653	1.09909	1.09909	173.918	158.238
Cstf3	ENSMUSG00000027176	Cstf3	0.0145829	0.24834	1.11104	1.11104	111.006	99.9119
Eef1a1	ENSMUSG00000037742	Eef1a1	4.14961e-08	2.1975e-06	0.929359	-1.07601	2914.08	3135.58
Mtdh	ENSMUSG00000022255	Mtdh	1.79964e-06	7.43927e-05	1.12291	1.12291	339.357	302.213
Snx29	ENSMUSG00000071669	Snx29	0.0108522	0.192258	1.08888	1.08888	253.855	233.135
Cd38	ENSMUSG00000029084	Cd38	1.70789e-06	7.07492e-05	1.14864	1.14864	366.118	318.741
Faf1	ENSMUSG00000010517	Faf1	3.53406e-07	1.61414e-05	1.21571	1.21571	141.431	116.336
Trmt112	ENSMUSG00000038812	Trmt112	2.40474e-07	1.13266e-05	0.879993	-1.13637	271.027	307.988
Dip2b	ENSMUSG00000023026	Dip2b	8.12257e-09	4.92736e-07	1.18527	1.18527	257.745	217.457
Cox7a2l	ENSMUSG00000024248	Cox7a2l	5.88625e-06	0.000222226	0.868229	-1.15177	144.71	166.673
Rpl10a	ENSMUSG00000037805	Rpl10a	3.56078e-12	3.14279e-10	0.890992	-1.12234	1538.56	1726.79
Zc3h7a	ENSMUSG00000037965	Zc3h7a	0.00587857	0.114384	0.929516	-1.07583	276.637	297.615
Itm2b	ENSMUSG00000022108	Itm2b	4.63342e-08	2.43397e-06	0.901623	-1.10911	467.437	518.439
Ighm	ENSMUSG00000076617	Ighm	0.000214439	0.00605434	0.941648	-1.06197	1657.48	1760.19
Ktn1	ENSMUSG00000021843	Ktn1	0.00124524	0.0293966	1.10846	1.10846	210.858	190.226
Taldo1	ENSMUSG00000025503	Taldo1	0.0031739	0.0670144	0.917037	-1.09047	163.317	178.092
Ikzf1	ENSMUSG00000018654	Ikzf1	1.16406e-12	1.08098e-10	1.19372	1.19372	613.609	514.032
Thada	ENSMUSG00000024251	Thada	0.0031935	0.0673556	1.13192	1.13192	129.225	114.165
Xrn2	ENSMUSG00000027433	Xrn2	1.83296e-06	7.54518e-05	1.14321	1.14321	239.095	209.144
Ube3a	ENSMUSG00000025326	Ube3a	1.25859e-05	0.000447564	1.14891	1.14891	167.765	146.022
Riok3	ENSMUSG00000024404	Riok3	0.0052303	0.103832	1.10115	1.10115	128.839	117.005
Lncpint	ENSMUSG00000044471	Lncpint	2.2146e-17	3.49943e-15	1.37269	1.37269	262.119	190.953
Itpr2	ENSMUSG00000030287	Itpr2	1.18936e-05	0.00042604	1.15243	1.15243	276.852	240.233
Ranbp9	ENSMUSG00000038546	Ranbp9	0.0306881	0.454156	1.09301	1.09301	110.903	101.465
Vars	ENSMUSG00000007029	Vars	0.000645536	0.0164911	1.10458	1.10458	176.133	159.457
Rlf	ENSMUSG00000049878	Rlf	0.0215332	0.340764	1.09882	1.09882	113.328	103.136
Actb	ENSMUSG00000029580	Actb	9.83219e-28	6.02038e-25	0.861644	-1.16057	5005.37	5809.1
Pitpna	ENSMUSG00000017781	Pitpna	0.00587109	0.114352	1.06988	1.06988	257.87	241.027
Gpbp1l1	ENSMUSG00000034042	Gpbp1l1	0.0330409	0.482777	1.09205	1.09205	107.538	98.4728
Usp34	ENSMUSG00000056342	Usp34	9.72573e-09	5.84558e-07	1.18569	1.18569	245.088	206.705
Syf2	ENSMUSG00000028821	Syf2	0.00192707	0.0431908	0.899754	-1.11141	109.997	122.252
Bbx	ENSMUSG00000022641	Bbx	0.000585712	0.0151404	1.14875	1.14875	135.457	117.916
Uvrag	ENSMUSG00000035354	Uvrag	5.24497e-12	4.56755e-10	1.18706	1.18706	452.41	381.117
Hck	ENSMUSG00000003283	Hck	0.0192606	0.310867	0.910967	-1.09773	119.89	131.607
Mrpl34	ENSMUSG00000034880	Mrpl34	0.0348851	0.505202	0.90094	-1.10995	83.0729	92.2069
Nol7	ENSMUSG00000063200	Nol7	5.35844e-08	2.79237e-06	0.866523	-1.15404	215.468	248.658
Sla	ENSMUSG00000022372	Sla	5.13279e-06	0.000195285	1.17938	1.17938	138.411	117.359
Rab3gap1	ENSMUSG00000036104	Rab3gap1	0.0389373	0.554864	1.07836	1.07836	126.702	117.495
Gbf1	ENSMUSG00000025224	Gbf1	0.0329716	0.482649	1.08834	1.08834	124.136	114.061
Nsd1	ENSMUSG00000021488	Nsd1	0.00140548	0.0327341	1.09261	1.09261	287.099	262.765
Pafah1b1	ENSMUSG00000020745	Pafah1b1	3.11481e-05	0.0010206	1.10319	1.10319	307.385	278.632
BC028528	ENSMUSG00000038543	BC028528	0.0220205	0.346562	0.898204	-1.11333	87.0703	96.9383
Gimap7	ENSMUSG00000043931	Gimap7	0.0372789	0.53369	0.932246	-1.07268	140.449	150.657
Taok3	ENSMUSG00000061288	Taok3	6.72782e-06	0.000249668	1.13932	1.13932	229.076	201.063
Kdm2a	ENSMUSG00000054611	Kdm2a	0.000842352	0.0210524	1.10448	1.10448	201.647	182.573
Pi4ka	ENSMUSG00000041720	Pi4ka	0.0147589	0.250378	1.10311	1.10311	112.643	102.113
Serf2	ENSMUSG00000074884	Serf2	1.94594e-23	5.86595e-21	0.842928	-1.18634	794.898	943.02
Edf1	ENSMUSG00000015092	Edf1	0.000192646	0.00549446	0.905914	-1.10386	207.304	228.834
Rpl7a	ENSMUSG00000062647	Rpl7a	3.12143e-08	1.70842e-06	0.908894	-1.10024	967.488	1064.47
Alyref	ENSMUSG00000025134	Alyref	0.0191863	0.310334	0.919471	-1.08758	109.876	119.499
Ralgapa2	ENSMUSG00000037110	Ralgapa2	0.0274096	0.41413	1.11658	1.11658	101.759	91.1345
Atp5f1	ENSMUSG00000000563	.	0.0150471	0.254166	0.938638	-1.06537	212.864	226.78
Tcf20	ENSMUSG00000041852	Tcf20	1.61172e-06	6.71914e-05	1.18782	1.18782	184.188	155.064
Slc50a1	ENSMUSG00000027953	Slc50a1	0.000609028	0.0156811	0.90373	-1.10652	150.264	166.271
Pten	ENSMUSG00000013663	Pten	0.0111856	0.19763	1.06174	1.06174	341.239	321.396
Stk4	ENSMUSG00000018209	Stk4	0.000787726	0.0198135	1.08922	1.08922	286.745	263.257
Taf10	ENSMUSG00000043866	Taf10	0.00179773	0.0406704	0.916725	-1.09084	197.23	215.146
Lrrk2	ENSMUSG00000036273	Lrrk2	7.55673e-09	4.62708e-07	1.20132	1.20132	361.522	300.938
Rps5	ENSMUSG00000012848	Rps5	1.43516e-17	2.32401e-15	0.868509	-1.1514	2771.72	3191.35
Gimap9	ENSMUSG00000051124	Gimap9	0.0354659	0.512478	0.918602	-1.08861	95.5567	104.024
Pcm1	ENSMUSG00000031592	Pcm1	0.00101818	0.0247828	1.11659	1.11659	154.929	138.752
Ino80	ENSMUSG00000034154	Ino80	0.00686875	0.130666	1.12024	1.12024	110.434	98.581
Cox7b	ENSMUSG00000031231	Cox7b	0.000385815	0.010456	0.893493	-1.1192	146.967	164.486
Zhx2	ENSMUSG00000071757	Zhx2	0.00110342	0.0265934	1.15741	1.15741	120.712	104.295
Mecp2	ENSMUSG00000031393	Mecp2	0.0149237	0.252951	1.10805	1.10805	110.303	99.5468
Atf6	ENSMUSG00000026663	Atf6	0.00230445	0.0505072	1.12574	1.12574	158.583	140.871
Sp4	ENSMUSG00000025323	Sp4	0.0418762	0.589033	1.11348	1.11348	96.3281	86.5106
Zeb1	ENSMUSG00000024238	Zeb1	4.43114e-06	0.000170577	1.17701	1.17701	218.57	185.699
Rpl5	ENSMUSG00000058558	Rpl5	1.78344e-07	8.56489e-06	0.907862	-1.10149	627.27	690.931
Smg7	ENSMUSG00000042772	Smg7	0.00299182	0.0639975	1.12408	1.12408	117.997	104.972
Mzb1	ENSMUSG00000024353	Mzb1	3.55194e-16	4.86691e-14	0.809795	-1.23488	368.663	455.255

## Sheet: Spleen_Follicular_HF vs sham
Gene ID	Ensembl ID	Gene name	P-value	FDR step up	Ratio	Fold change	LSMean(HF)	LSMean(sham)		Genes differentially expressed in antigen processing and presentation
Hsp90ab1	ENSMUSG00000023944	Hsp90ab1	1.83411e-41	3.60403e-37	0.765819	-1.30579	1675.94	2188.42		Gene Symbol	Gene Description
Hsp90aa1	ENSMUSG00000021270	Hsp90aa1	5.60936e-26	5.5112e-22	0.656664	-1.52285	188.436	286.96		HLA-DRB5	major histocompatibility complex, class II, DR beta 5
Hspa8	ENSMUSG00000015656	Hspa8	6.85343e-23	4.48899e-19	0.80189	-1.24705	1052.42	1312.42		HLA-DMB	major histocompatibility complex, class II, DM beta
Dnaja1	ENSMUSG00000028410	Dnaja1	1.05361e-21	5.17584e-18	0.713708	-1.40113	301.007	421.751		HLA-A	major histocompatibility complex, class I, A
Hspe1	ENSMUSG00000073676	Hspe1	5.58258e-21	2.19395e-17	0.729298	-1.37118	305.109	418.36		HLA-B	major histocompatibility complex, class I, B
Iglc3	ENSMUSG00000105547	Iglc3	5.48333e-12	1.79579e-08	1.1513	1.1513	1366.84	1187.22		HSPA8	heat shock protein family A (Hsp70) member 8
Junb	ENSMUSG00000052837	Junb	1.41959e-11	3.985e-08	1.40199	1.40199	185.778	132.511		HSP90AA1	heat shock protein 90 alpha family class A member 1
Ccnd3	ENSMUSG00000034165	Ccnd3	8.52415e-11	2.09374e-07	0.810853	-1.23327	294.764	363.523		HSP90AB1	heat shock protein 90 alpha family class B member 1
H3f3b	ENSMUSG00000016559	H3f3b	2.40504e-09	5.25101e-06	0.896895	-1.11496	1121.02	1249.89		IFI30	IFI30 lysosomal thiol reductase
Ahsa1	ENSMUSG00000021037	Ahsa1	4.7163e-09	8.96473e-06	0.770853	-1.29726	106.849	138.612		B2M	beta-2-microglobulin
Cd55	ENSMUSG00000026399	Cd55	5.01843e-09	8.96473e-06	1.22436	1.22436	384.077	313.696
Napsa	ENSMUSG00000002204	Napsa	1.10496e-08	1.80937e-05	0.879103	-1.13752	618.894	704.006
Hspd1	ENSMUSG00000025980	Hspd1	3.98694e-08	6.02641e-05	0.780425	-1.28135	160.823	206.071
Coro1a	ENSMUSG00000030707	Coro1a	5.29072e-08	7.4259e-05	1.0892	1.0892	1429.54	1312.47
Add3	ENSMUSG00000025026	Add3	7.23445e-08	9.47713e-05	1.21825	1.21825	273.618	224.599
Stip1	ENSMUSG00000024966	Stip1	2.78061e-07	0.000341494	0.770694	-1.29753	97.6341	126.683
Pdcd4	ENSMUSG00000024975	Pdcd4	4.38813e-07	0.000507217	0.845662	-1.1825	269.854	319.104
Cacybp	ENSMUSG00000014226	Cacybp	9.44054e-07	0.00103059	0.808092	-1.23748	132.502	163.969
Hsph1	ENSMUSG00000029657	Hsph1	1.44641e-06	0.00149589	0.737066	-1.35673	79.753	108.203
Ptges3	ENSMUSG00000071072	Ptges3	1.54885e-06	0.00152175	0.836178	-1.19592	187.856	224.66
Pde4b	ENSMUSG00000028525	Pde4b	2.15599e-06	0.00201739	1.20512	1.20512	232.228	192.701
CAAA01147332.1	ENSMUSG00000095742	.	2.68921e-06	0.00240195	1.21071	1.21071	193.138	159.525
Chordc1	ENSMUSG00000001774	Chordc1	2.98823e-06	0.00255299	0.792651	-1.26159	94.4805	119.196
Gm43305	ENSMUSG00000105703	Gm43305	5.28762e-06	0.00432924	0.870841	-1.14831	504.344	579.145
B2m	ENSMUSG00000060802	B2m	7.73216e-06	0.00607748	0.928476	-1.07703	1140.71	1228.58
Sp140	ENSMUSG00000070031	Sp140	2.26588e-05	0.0171249	0.847986	-1.17926	200.618	236.581
Acp5	ENSMUSG00000001348	Acp5	2.77375e-05	0.0201867	0.854562	-1.17019	210.819	246.698
Ddit4	ENSMUSG00000020108	Ddit4	2.9375e-05	0.0206149	0.818154	-1.22226	138.033	168.712
Sorl1	ENSMUSG00000049313	Sorl1	5.76054e-05	0.0390326	0.871131	-1.14793	259.581	297.981
Laptm5	ENSMUSG00000028581	Laptm5	5.96705e-05	0.0390842	0.89992	-1.11121	443.286	492.583
Lsp1	ENSMUSG00000018819	Lsp1	8.33138e-05	0.0528102	1.10888	1.10888	482.275	434.92
Fli1	ENSMUSG00000016087	Fli1	0.000103554	0.0635888	1.14223	1.14223	275.581	241.265
Igkc	ENSMUSG00000076609	Igkc	0.000125163	0.0745286	1.07511	1.07511	1708.09	1588.76
Fchsd2	ENSMUSG00000030691	Fchsd2	0.000154171	0.0883493	1.13586	1.13586	385.755	339.614
Hsp90b1	ENSMUSG00000020048	Hsp90b1	0.000157365	0.0883493	0.897812	-1.11382	451.849	503.278
Ier2	ENSMUSG00000053560	Ier2	0.000179447	0.0979479	1.19041	1.19041	161.242	135.451
Mir142hg	ENSMUSG00000084796	Mir142hg	0.000194869	0.101623	0.916729	-1.09083	600.209	654.729
Evl	ENSMUSG00000021262	Evl	0.000196522	0.101623	1.17146	1.17146	152.338	130.04
Dennd4a	ENSMUSG00000053641	Dennd4a	0.000218624	0.108508	1.17649	1.17649	195.899	166.511
Emp3	ENSMUSG00000040212	Emp3	0.000220882	0.108508	1.17789	1.17789	229.807	195.101
S100a10	ENSMUSG00000041959	S100a10	0.000231765	0.111078	1.13143	1.13143	357.224	315.729
Ly6a	ENSMUSG00000075602	Ly6a	0.000272377	0.127434	0.883443	-1.13193	558.904	632.643
Ifi27l2a	ENSMUSG00000079017	Ifi27l2a	0.000299724	0.136967	0.863065	-1.15866	449.822	521.191
Ralgps2	ENSMUSG00000026594	Ralgps2	0.000446566	0.199432	1.08371	1.08371	714.101	658.939
St13	ENSMUSG00000022403	St13	0.000481199	0.210102	0.857776	-1.16581	133.279	155.377
Ifi30	ENSMUSG00000031838	Ifi30	0.000491843	0.210102	0.88571	-1.12904	478.563	540.316
Dnajc7	ENSMUSG00000014195	Dnajc7	0.00053803	0.224866	0.872372	-1.1463	210.68	241.502
Chchd2	ENSMUSG00000070493	Chchd2	0.000549291	0.224866	0.897897	-1.11371	261.36	291.08
Tagln2	ENSMUSG00000026547	Tagln2	0.000571773	0.229293	1.19844	1.19844	192.777	160.856
Camk2d	ENSMUSG00000053819	Camk2d	0.00058667	0.230561	1.12404	1.12404	273.728	243.521
Rbm3	ENSMUSG00000031167	Rbm3	0.000642886	0.2477	1.10185	1.10185	404.256	366.888
Hvcn1	ENSMUSG00000064267	Hvcn1	0.000675332	0.255198	0.896457	-1.1155	322.222	359.44
H2-D1	ENSMUSG00000073411	H2-D1	0.000715381	0.265231	0.954188	-1.04801	2017.79	2114.66
Ighd	ENSMUSG00000104213	Ighd	0.000840277	0.305768	1.0813	1.0813	751.881	695.349
Fcer2a	ENSMUSG00000005540	Fcer2a	0.000978545	0.349608	1.12675	1.12675	322.437	286.166
Ccm2	ENSMUSG00000000378	Ccm2	0.0010102	0.354473	1.13655	1.13655	186.743	164.307
Fry	ENSMUSG00000056602	Fry	0.0010576	0.36071	1.19169	1.19169	110.625	92.8309
Pou2f2	ENSMUSG00000008496	Pou2f2	0.0010676	0.36071	1.11181	1.11181	317.277	285.37
H2-Eb1	ENSMUSG00000060586	H2-Eb1	0.00108605	0.36071	1.03991	1.03991	3922.82	3772.27
BE692007	ENSMUSG00000099757	BE692007	0.0011014	0.36071	1.1209	1.1209	278.444	248.412
Aff3	ENSMUSG00000037138	Aff3	0.00112793	0.363342	1.09385	1.09385	471.601	431.138
Cmss1	ENSMUSG00000022748	Cmss1	0.00118333	0.37504	0.925823	-1.08012	6526.94	7049.88
Capns1	ENSMUSG00000001794	Capns1	0.00140793	0.43914	1.14404	1.14404	139.023	121.52
Erp29	ENSMUSG00000029616	Erp29	0.00144306	0.443065	0.902652	-1.10785	249.924	276.877
Wdr83os	ENSMUSG00000059355	Wdr83os	0.00151886	0.459164	1.14742	1.14742	143.554	125.11
Jund	ENSMUSG00000071076	Jund	0.00179046	0.533069	1.0883	1.0883	735.361	675.697
Foxn3	ENSMUSG00000033713	Foxn3	0.00190649	0.559141	0.924483	-1.08169	588.048	636.083
Plaur	ENSMUSG00000046223	Plaur	0.00201059	0.581002	1.16543	1.16543	169.511	145.45
H2-K1	ENSMUSG00000061232	H2-K1	0.00206801	0.582396	0.951233	-1.05127	1478.03	1553.81
Pkig	ENSMUSG00000035268	Pkig	0.00210106	0.582396	0.916558	-1.09104	356.014	388.425
Pou2af1	ENSMUSG00000032053	Pou2af1	0.00210433	0.582396	0.886012	-1.12865	193.915	218.862
Foxp1	ENSMUSG00000030067	Foxp1	0.0022348	0.609915	1.06616	1.06616	981.943	921.009
Igkv2-112	ENSMUSG00000076518	Igkv2-112	0.0022907	0.616608	1.28704	1.28704	104.885	81.4932
Setbp1	ENSMUSG00000024548	Setbp1	0.00238049	0.632116	1.16309	1.16309	128.89	110.816
Rasgrp2	ENSMUSG00000032946	Rasgrp2	0.00257606	0.674927	1.12636	1.12636	214.818	190.719
Cd37	ENSMUSG00000030798	Cd37	0.00269002	0.6882	1.04867	1.04867	1372.63	1308.93
Cd47	ENSMUSG00000055447	Cd47	0.00269676	0.6882	0.918964	-1.08818	345.72	376.206
Arap2	ENSMUSG00000037999	Arap2	0.00279973	0.705317	0.87981	-1.13661	140.377	159.554
Ctsz	ENSMUSG00000016256	Ctsz	0.00299542	0.745063	0.900808	-1.11011	209.118	232.145
Bri3	ENSMUSG00000047843	Bri3	0.00320754	0.787853	0.877197	-1.13999	121.889	138.953
Prkcb	ENSMUSG00000052889	Prkcb	0.00344355	0.828388	1.07782	1.07782	507.8	471.135
Ankrd44	ENSMUSG00000052331	Ankrd44	0.00345689	0.828388	1.10726	1.10726	244.579	220.887
Ebf1	ENSMUSG00000057098	Ebf1	0.0035031	0.829349	1.05109	1.05109	1547.21	1472
Zfp36l1	ENSMUSG00000021127	Zfp36l1	0.00364655	0.853031	1.07938	1.07938	540.486	500.736
Cep85	ENSMUSG00000037443	Cep85	0.00373564	0.855581	0.876697	-1.14065	212.465	242.347
Ubb	ENSMUSG00000019505	Ubb	0.00374453	0.855581	0.961717	-1.03981	1801.16	1872.86
Rbm25	ENSMUSG00000010608	Rbm25	0.00396247	0.884908	1.11211	1.11211	211.14	189.855
Clec2i	ENSMUSG00000030365	Clec2i	0.00396295	0.884908	1.18142	1.18142	107.642	91.1121
Rps27	ENSMUSG00000090733	Rps27	0.00425965	0.912771	1.0309	1.0309	4424.7	4292.08
Cd72	ENSMUSG00000028459	Cd72	0.00429274	0.912771	0.900667	-1.11029	258.211	286.689
Id3	ENSMUSG00000007872	Id3	0.0044274	0.912771	0.878058	-1.13888	201.875	229.911
Fcrla	ENSMUSG00000038421	Fcrla	0.0045024	0.912771	0.908457	-1.10077	269.125	296.245
Ccr7	ENSMUSG00000037944	Ccr7	0.00455971	0.912771	1.15368	1.15368	191.446	165.943
Apoe	ENSMUSG00000002985	Apoe	0.00465395	0.912771	0.834844	-1.19783	135.372	162.153
Arhgdib	ENSMUSG00000030220	Arhgdib	0.00466378	0.912771	1.04624	1.04624	1277.85	1221.37
Ywhah	ENSMUSG00000018965	Ywhah	0.00479804	0.912771	0.896796	-1.11508	174.996	195.135
Snx9	ENSMUSG00000002365	Snx9	0.00499137	0.912771	1.11062	1.11062	207.225	186.585
Ptbp3	ENSMUSG00000028382	Ptbp3	0.00502611	0.912771	1.09258	1.09258	289.648	265.106
Atxn7l3b	ENSMUSG00000074748	Atxn7l3b	0.0050842	0.912771	1.12629	1.12629	136.111	120.85
Ppp1r21	ENSMUSG00000034709	Ppp1r21	0.00509355	0.912771	0.866739	-1.15375	90.4996	104.414
Irf8	ENSMUSG00000041515	Irf8	0.00515377	0.912771	0.909239	-1.09982	265.999	292.551
Ubac2	ENSMUSG00000041765	Ubac2	0.0051953	0.912771	1.13064	1.13064	122.823	108.632
Ptpn6	ENSMUSG00000004266	Ptpn6	0.00583795	0.912771	0.929146	-1.07626	441.949	475.651
Igkv17-127	ENSMUSG00000076508	Igkv17-127	0.00590169	0.912771	1.37733	1.37733	373.478	271.16
Zfp36l2	ENSMUSG00000045817	Zfp36l2	0.00632878	0.912771	0.884404	-1.13071	145.737	164.785
Cd52	ENSMUSG00000000682	Cd52	0.006723	0.912771	1.04095	1.04095	3043.58	2923.86
Zfp706	ENSMUSG00000062397	Zfp706	0.00675609	0.912771	0.92563	-1.08035	315.148	340.468
Ssna1	ENSMUSG00000026966	Ssna1	0.00683353	0.912771	1.14358	1.14358	105.638	92.3744
Lmo2	ENSMUSG00000032698	Lmo2	0.00701395	0.912771	1.11105	1.11105	206.606	185.955
Phf5a	ENSMUSG00000061360	Phf5a	0.00702191	0.912771	0.882294	-1.13341	96.502	109.376
Fus	ENSMUSG00000030795	Fus	0.00704578	0.912771	1.10265	1.10265	233.395	211.667
Ighm	ENSMUSG00000076617	Ighm	0.00729845	0.912771	1.04496	1.04496	1704.69	1631.34
Stap1	ENSMUSG00000029254	Stap1	0.00749162	0.912771	1.10601	1.10601	229.037	207.084
Lpp	ENSMUSG00000033306	Lpp	0.00751432	0.912771	1.14265	1.14265	118.081	103.34
Dazap2	ENSMUSG00000000346	Dazap2	0.00765678	0.912771	1.09961	1.09961	212.624	193.363
Stat1	ENSMUSG00000026104	Stat1	0.0090783	0.912771	0.884017	-1.1312	176.912	200.122
Gimap6	ENSMUSG00000047867	Gimap6	0.00908716	0.912771	1.07233	1.07233	487.559	454.671
Fam107b	ENSMUSG00000026655	Fam107b	0.00946106	0.912771	0.908534	-1.10067	252.066	277.443
Fkbp4	ENSMUSG00000030357	Fkbp4	0.0103846	0.912771	0.889449	-1.12429	108.058	121.488
Pxdc1	ENSMUSG00000021411	Pxdc1	0.0111818	0.912771	1.12727	1.12727	149.112	132.277
Ier5	ENSMUSG00000056708	Ier5	0.011214	0.912771	1.08774	1.08774	284.159	261.238
Zfp36	ENSMUSG00000044786	Zfp36	0.0119944	0.912771	1.09886	1.09886	252.958	230.2
Tpd52	ENSMUSG00000027506	Tpd52	0.0120807	0.912771	1.11966	1.11966	116.647	104.181
H2-Q6	ENSMUSG00000073409	H2-Q6	0.0121043	0.912771	0.90599	-1.10377	169.987	187.626
Ripor2	ENSMUSG00000036006	Ripor2	0.0121321	0.912771	1.0689	1.0689	556.297	520.44
Bin1	ENSMUSG00000024381	Bin1	0.0125839	0.912771	1.09701	1.09701	195.441	178.158
Ighv3-6	ENSMUSG00000076672	Ighv3-6	0.0125986	0.912771	1.1667	1.1667	186.634	159.967
Cst3	ENSMUSG00000027447	Cst3	0.0130875	0.912771	1.09754	1.09754	221.35	201.678
Vapa	ENSMUSG00000024091	Vapa	0.0132508	0.912771	1.10484	1.10484	153.817	139.221
Chchd10	ENSMUSG00000049422	Chchd10	0.0136353	0.912771	1.10293	1.10293	225.237	204.216
Ltb	ENSMUSG00000024399	Ltb	0.0147828	0.912771	1.05651	1.05651	941.829	891.451
Aff4	ENSMUSG00000049470	Aff4	0.0155126	0.912771	1.11612	1.11612	125.11	112.094
Eif3d	ENSMUSG00000016554	Eif3d	0.0155904	0.912771	1.12843	1.12843	103.268	91.5144
BC031181	ENSMUSG00000036299	BC031181	0.0157219	0.912771	1.1096	1.1096	117.77	106.137
Prpf38b	ENSMUSG00000027881	Prpf38b	0.016167	0.912771	1.10908	1.10908	134.482	121.255
Pak2	ENSMUSG00000022781	Pak2	0.016625	0.912771	1.08455	1.08455	242.478	223.576
Sltm	ENSMUSG00000032212	Sltm	0.0168399	0.912771	1.1141	1.1141	131.618	118.138
Dpm3	ENSMUSG00000042737	Dpm3	0.0170635	0.912771	1.09381	1.09381	194.128	177.479
Rala	ENSMUSG00000008859	Rala	0.0171706	0.912771	1.12353	1.12353	102.31	91.0611
Srsf5	ENSMUSG00000021134	Srsf5	0.0172989	0.912771	1.10225	1.10225	151.899	137.808
Cox20	ENSMUSG00000026500	Cox20	0.0175629	0.912771	1.11534	1.11534	125.269	112.314
Phf20l1	ENSMUSG00000072501	Phf20l1	0.017692	0.912771	1.11202	1.11202	127.26	114.44
Rpl37	ENSMUSG00000041841	Rpl37	0.0177534	0.912771	0.977066	-1.02347	5346.7	5472.2
Cnot4	ENSMUSG00000038784	Cnot4	0.0179911	0.912771	1.11109	1.11109	120.293	108.266
Gm42031	ENSMUSG00000110386	Gm42031	0.0180306	0.912771	0.903335	-1.10701	167.574	185.505
Bach2	ENSMUSG00000040270	Bach2	0.0180433	0.912771	1.0698	1.0698	554.952	518.746
Ptprc	ENSMUSG00000026395	Ptprc	0.0183433	0.912771	1.05454	1.05454	668.379	633.809
Unc93b1	ENSMUSG00000036908	Unc93b1	0.0185217	0.912771	0.943193	-1.06023	453.785	481.116
Macf1	ENSMUSG00000028649	Macf1	0.0193022	0.912771	1.06757	1.06757	415.428	389.135
Tax1bp1	ENSMUSG00000004535	Tax1bp1	0.0195246	0.912771	1.07875	1.07875	280.987	260.475
Ddx21	ENSMUSG00000020075	Ddx21	0.0196019	0.912771	0.902824	-1.10764	145.986	161.699
Igkv3-4	ENSMUSG00000096715	Igkv3-4	0.0196305	0.912771	1.34757	1.34757	305.126	226.428
Man1a	ENSMUSG00000003746	Man1a	0.0202964	0.912771	1.06737	1.06737	474.132	444.207
Pld4	ENSMUSG00000052160	Pld4	0.0204062	0.912771	1.12351	1.12351	116.467	103.664
Srebf2	ENSMUSG00000022463	Srebf2	0.0209162	0.912771	1.11692	1.11692	108.59	97.2225
Ost4	ENSMUSG00000038803	Ost4	0.0209188	0.912771	1.06863	1.06863	326.256	305.302
Rel	ENSMUSG00000020275	Rel	0.0209593	0.912771	1.08738	1.08738	266.099	244.716
Tln1	ENSMUSG00000028465	Tln1	0.021077	0.912771	1.08578	1.08578	226.565	208.666
Tra2a	ENSMUSG00000029817	Tra2a	0.0210867	0.912771	1.09987	1.09987	150.903	137.2
Uqcrq	ENSMUSG00000044894	Uqcrq	0.0211769	0.912771	0.918695	-1.0885	192.403	209.431
Smchd1	ENSMUSG00000024054	Smchd1	0.0213503	0.912771	1.08668	1.08668	243.461	224.041
Ncl	ENSMUSG00000026234	Ncl	0.0215236	0.912771	0.927075	-1.07866	362.835	391.377
Grk2	ENSMUSG00000024858	Grk2	0.0220279	0.912771	1.08733	1.08733	205.883	189.348
Lat2	ENSMUSG00000040751	Lat2	0.0230796	0.912771	1.10627	1.10627	128.581	116.23
Rhoh	ENSMUSG00000029204	Rhoh	0.0231486	0.912771	1.09675	1.09675	178.495	162.75
Dgkd	ENSMUSG00000070738	Dgkd	0.023155	0.912771	0.918926	-1.08823	188.417	205.04
Galnt1	ENSMUSG00000000420	Galnt1	0.0234944	0.912771	1.10739	1.10739	124.444	112.376
Rapgef6	ENSMUSG00000037533	Rapgef6	0.0236158	0.912771	1.0863	1.0863	207.848	191.336
Arl6ip1	ENSMUSG00000030654	Arl6ip1	0.0236771	0.912771	0.946341	-1.0567	446.215	471.516
Tbc1d5	ENSMUSG00000023923	Tbc1d5	0.0236845	0.912771	1.11563	1.11563	117.455	105.281
Tle5	ENSMUSG00000054452	Tle5	0.0237571	0.912771	1.0706	1.0706	294.612	275.184
Stk17b	ENSMUSG00000026094	Stk17b	0.0238009	0.912771	1.06613	1.06613	426.471	400.018
Arhgdia	ENSMUSG00000025132	Arhgdia	0.0238972	0.912771	0.927292	-1.07841	226.094	243.821
Hdac9	ENSMUSG00000004698	Hdac9	0.0240184	0.912771	1.16321	1.16321	101.873	87.5791
Ppp1r14b	ENSMUSG00000056612	Ppp1r14b	0.0242423	0.912771	0.891451	-1.12177	114.3	128.218
Pgap1	ENSMUSG00000073678	Pgap1	0.0245999	0.912771	1.12682	1.12682	108.617	96.3927
Satb1	ENSMUSG00000023927	Satb1	0.0251689	0.912771	0.907247	-1.10224	158.353	174.542
Top2b	ENSMUSG00000017485	Top2b	0.0252391	0.912771	1.10046	1.10046	135.908	123.501
Tmem128	ENSMUSG00000067365	Tmem128	0.0253564	0.912771	1.12509	1.12509	94.9837	84.4236
Sh3kbp1	ENSMUSG00000040990	Sh3kbp1	0.0254407	0.912771	1.08738	1.08738	212.657	195.568
Igkv1-110	ENSMUSG00000093861	Igkv1-110	0.0263409	0.912771	1.23994	1.23994	549.494	443.162
Spib	ENSMUSG00000008193	Spib	0.0266203	0.912771	0.913552	-1.09463	188.19	205.998
Rasgef1b	ENSMUSG00000089809	Rasgef1b	0.0280888	0.912771	1.12494	1.12494	108.9	96.8054
Itga4	ENSMUSG00000027009	Itga4	0.0288918	0.912771	1.09038	1.09038	199.052	182.552
Klf3	ENSMUSG00000029178	Klf3	0.0290637	0.912771	1.11174	1.11174	141.933	127.667
Rps11	ENSMUSG00000003429	Rps11	0.0292756	0.912771	0.974644	-1.02602	3215.54	3299.2
Tpt1	ENSMUSG00000060126	Tpt1	0.0303528	0.912771	0.975688	-1.02492	2492.33	2554.43
Ly6d	ENSMUSG00000034634	Ly6d	0.0307435	0.912771	0.960618	-1.041	2495.16	2597.45
2410006H16Rik	ENSMUSG00000086841	2410006H16Rik	0.0309737	0.912771	0.938822	-1.06516	437.216	465.707
Pde7a	ENSMUSG00000069094	Pde7a	0.0313619	0.912771	1.08666	1.08666	195.228	179.659
Psen2	ENSMUSG00000010609	Psen2	0.0316639	0.912771	1.12552	1.12552	95.5048	84.8542
Elmsan1	ENSMUSG00000042507	.	0.032238	0.912771	1.10096	1.10096	129.549	117.669
Dnajc9	ENSMUSG00000021811	Dnajc9	0.0325249	0.912771	1.1006	1.1006	121.485	110.381
Dusp2	ENSMUSG00000027368	Dusp2	0.0332042	0.912771	1.10102	1.10102	213.238	193.673
Dynll1	ENSMUSG00000009013	Dynll1	0.0338027	0.912771	0.943313	-1.06009	407.54	432.031
Irf2	ENSMUSG00000031627	Irf2	0.034702	0.912771	1.07357	1.07357	266.583	248.314
Adgre5	ENSMUSG00000002885	Adgre5	0.0353271	0.912771	1.09473	1.09473	186.99	170.809
Traf5	ENSMUSG00000026637	Traf5	0.0357933	0.912771	1.10759	1.10759	112.199	101.3
Akt3	ENSMUSG00000019699	Akt3	0.0363828	0.912771	1.10224	1.10224	119.306	108.24
Card11	ENSMUSG00000036526	Card11	0.0365905	0.912771	1.09066	1.09066	161.674	148.235
Gm43388	ENSMUSG00000104927	Gm43388	0.0372512	0.912771	1.11987	1.11987	105.391	94.1095
Rap1a	ENSMUSG00000068798	Rap1a	0.0372575	0.912771	1.07284	1.07284	240.598	224.263
Psmb2	ENSMUSG00000028837	Psmb2	0.0374273	0.912771	0.920896	-1.0859	143.444	155.765
Vpreb3	ENSMUSG00000000903	Vpreb3	0.0375575	0.912771	0.919405	-1.08766	304.194	330.859
Sec61g	ENSMUSG00000078974	Sec61g	0.0378535	0.912771	0.949091	-1.05364	410.472	432.49
Ran	ENSMUSG00000029430	Ran	0.0383704	0.912771	0.93479	-1.06976	297.43	318.178
Arhgap45	ENSMUSG00000035697	Arhgap45	0.0385233	0.912771	1.05994	1.05994	450.287	424.822
Snu13	ENSMUSG00000063480	Snu13	0.03902	0.912771	0.920718	-1.08611	155.849	169.269
Sfr1	ENSMUSG00000025066	Sfr1	0.0391717	0.912771	1.10129	1.10129	119.477	108.488
Banf1	ENSMUSG00000024844	Banf1	0.0392062	0.912771	0.926023	-1.07989	200.701	216.734
Rpl6	ENSMUSG00000029614	Rpl6	0.0397202	0.912771	1.02065	1.02065	3870.16	3791.86
Ppp1r18	ENSMUSG00000034595	Ppp1r18	0.039829	0.912771	1.08026	1.08026	197.245	182.591
Fxyd5	ENSMUSG00000009687	Fxyd5	0.0412001	0.912771	1.09614	1.09614	136.817	124.817
Tspan32	ENSMUSG00000000244	Tspan32	0.0413742	0.912771	1.08006	1.08006	201.975	187.003
2023-03-01	ENSMUSG00000036469	.	0.0424316	0.912771	1.0802	1.0802	232.174	214.937
Plcg2	ENSMUSG00000034330	Plcg2	0.0428039	0.912771	1.08129	1.08129	187.643	173.537
Slc38a2	ENSMUSG00000022462	Slc38a2	0.043325	0.912771	1.09388	1.09388	130.571	119.365
Ifi203	ENSMUSG00000039997	Ifi203	0.0437927	0.912771	0.929193	-1.0762	250.329	269.404
Pxk	ENSMUSG00000033885	Pxk	0.0444984	0.912771	1.07281	1.07281	236.877	220.801
Atp2a3	ENSMUSG00000020788	Atp2a3	0.0452327	0.912771	1.09299	1.09299	138.343	126.573
Snx2	ENSMUSG00000034484	Snx2	0.0452533	0.912771	1.05635	1.05635	392.972	372.01
1810037I17Rik	ENSMUSG00000054091	1810037I17Rik	0.0455344	0.912771	1.08234	1.08234	157.195	145.237
AI467606	ENSMUSG00000045165	AI467606	0.0465289	0.912771	1.11061	1.11061	100.631	90.6084
Cct6a	ENSMUSG00000029447	Cct6a	0.0469019	0.912771	0.901326	-1.10948	94.8648	105.25
Rpl17	ENSMUSG00000062328	Rpl17	0.0469636	0.912771	1.02531	1.02531	2339.72	2281.97
Rabgap1l	ENSMUSG00000026721	Rabgap1l	0.0470669	0.912771	1.0821	1.0821	195.038	180.241
Dctn3	ENSMUSG00000028447	Dctn3	0.0474818	0.912771	1.0954	1.0954	108.695	99.229
Vav1	ENSMUSG00000034116	Vav1	0.0477134	0.912771	1.09617	1.09617	107.522	98.0889
Cd24a	ENSMUSG00000047139	Cd24a	0.047968	0.912771	1.08428	1.08428	247.66	228.41
Elmo1	ENSMUSG00000041112	Elmo1	0.0480151	0.912771	0.931692	-1.07332	222.59	238.91
Fkbp3	ENSMUSG00000020949	Fkbp3	0.0481935	0.912771	1.08453	1.08453	172.421	158.983
Epn1	ENSMUSG00000035203	Epn1	0.0482595	0.912771	1.0924	1.0924	114.285	104.618
H2-DMb1	ENSMUSG00000079547	H2-DMb1	0.0483845	0.912771	1.08845	1.08845	143.106	131.476
Gmip	ENSMUSG00000036246	Gmip	0.0485365	0.912771	1.09198	1.09198	119.188	109.149
Trim12a	ENSMUSG00000066258	Trim12a	0.0489001	0.912771	1.09377	1.09377	122.183	111.708
Elob	ENSMUSG00000055839	Elob	0.0491509	0.912771	1.05281	1.05281	418.757	397.75
Set	ENSMUSG00000054766	Set	0.0498853	0.912771	0.944857	-1.05836	360.284	381.31

## Sheet: Spleen_Follicular_NewMI vs sham
Gene ID	Ensembl ID	Gene name	P-value	FDR step up	Ratio	Fold change	LSMean(recentMI)	LSMean(sham)		Genes differentially expressed in antigen processing and presentation
Hsp90ab1	ENSMUSG00000023944	Hsp90ab1	4.74582e-15	3.10851e-11	0.850604	-1.17564	1861.48	2188.42		Gene Symbol	Gene Description
Hsp90aa1	ENSMUSG00000021270	Hsp90aa1	4.02625e-12	9.88947e-09	0.753003	-1.32802	216.082	286.96		HSPA8	heat shock protein family A (Hsp70) member 8
Hspa8	ENSMUSG00000015656	Hspa8	4.0669e-06	0.00178455	0.898284	-1.11323	1178.93	1312.42		HSP90AA1	heat shock protein 90 alpha family class A member 1
Dnaja1	ENSMUSG00000028410	Dnaja1	2.53434e-15	2.48999e-11	0.747778	-1.3373	315.376	421.751		HSP90AB1	heat shock protein 90 alpha family class B member 1
Hspe1	ENSMUSG00000073676	Hspe1	0.000111674	0.0313485	0.876562	-1.14082	366.718	418.36		HLA-A	major histocompatibility complex, class I, A
Ahsa1	ENSMUSG00000021037	Ahsa1	0.000625502	0.110731	0.852373	-1.17319	118.149	138.612		HLA-B	major histocompatibility complex, class I, B
Napsa	ENSMUSG00000002204	Napsa	0.000920373	0.143534	0.925671	-1.0803	651.678	704.006		IFI30	IFI30 lysosomal thiol reductase
Stip1	ENSMUSG00000024966	Stip1	0.000190188	0.0439671	0.818645	-1.22153	103.709	126.683		CD74	CD74 molecule
Cacybp	ENSMUSG00000014226	Cacybp	0.0332751	0.944631	0.908379	-1.10086	148.946	163.969
Hsph1	ENSMUSG00000029657	Hsph1	0.000128165	0.0335793	0.773144	-1.29342	83.6568	108.203
Ptges3	ENSMUSG00000071072	Ptges3	0.0233742	0.944631	0.917217	-1.09025	206.062	224.66
CAAA01147332.1	ENSMUSG00000095742	.	0.00976341	0.944631	1.11757	1.11757	178.28	159.525
Chordc1	ENSMUSG00000001774	Chordc1	0.000690402	0.119004	0.836441	-1.19554	99.7	119.196
Gm43305	ENSMUSG00000105703	Gm43305	0.000174556	0.042346	0.887382	-1.12691	513.923	579.145
Sp140	ENSMUSG00000070031	Sp140	0.0312798	0.944631	0.917247	-1.09022	217.003	236.581
Acp5	ENSMUSG00000001348	Acp5	6.34995e-06	0.00254646	0.837159	-1.19452	206.525	246.698
Ddit4	ENSMUSG00000020108	Ddit4	7.6025e-09	7.46946e-06	1.31758	1.31758	222.292	168.712
Mir142hg	ENSMUSG00000084796	Mir142hg	4.84499e-05	0.0156072	0.905468	-1.1044	592.836	654.729
Dennd4a	ENSMUSG00000053641	Dennd4a	1.86838e-12	5.24482e-09	1.37173	1.37173	228.408	166.511
Ly6a	ENSMUSG00000075602	Ly6a	4.686e-12	1.02311e-08	1.27121	1.27121	804.225	632.643
Ifi27l2a	ENSMUSG00000079017	Ifi27l2a	8.4048e-13	2.75257e-09	1.34604	1.34604	701.545	521.191
St13	ENSMUSG00000022403	St13	0.015666	0.944631	0.894677	-1.11772	139.012	155.377
Ifi30	ENSMUSG00000031838	Ifi30	2.76955e-11	5.44216e-08	0.780377	-1.28143	421.65	540.316
Dnajc7	ENSMUSG00000014195	Dnajc7	9.13091e-06	0.00351809	0.831184	-1.2031	200.733	241.502
Chchd2	ENSMUSG00000070493	Chchd2	0.0149932	0.944631	0.924758	-1.08136	269.178	291.08
Tagln2	ENSMUSG00000026547	Tagln2	0.00915399	0.899379	1.15532	1.15532	185.84	160.856
Rbm3	ENSMUSG00000031167	Rbm3	0.0115108	0.944631	1.07792	1.07792	395.475	366.888
H2-D1	ENSMUSG00000073411	H2-D1	6.94034e-07	0.000378827	0.930219	-1.07502	1967.1	2114.66
Pou2f2	ENSMUSG00000008496	Pou2f2	0.00143556	0.205904	0.893611	-1.11906	255.009	285.37
Cmss1	ENSMUSG00000022748	Cmss1	0.00139569	0.201657	0.922604	-1.08389	6504.25	7049.88
Erp29	ENSMUSG00000029616	Erp29	1.04836e-06	0.000542111	0.847124	-1.18046	234.55	276.877
Wdr83os	ENSMUSG00000059355	Wdr83os	0.00650915	0.68766	1.1318	1.1318	141.599	125.11
Jund	ENSMUSG00000071076	Jund	0.00106484	0.163469	0.909054	-1.10004	614.245	675.697
Foxn3	ENSMUSG00000033713	Foxn3	0.042106	0.944631	1.05403	1.05403	670.452	636.083
Plaur	ENSMUSG00000046223	Plaur	4.52942e-08	3.42319e-05	1.32318	1.32318	192.456	145.45
H2-K1	ENSMUSG00000061232	H2-K1	0.000306739	0.0641215	0.940385	-1.06339	1461.18	1553.81
Bri3	ENSMUSG00000047843	Bri3	0.0216595	0.944631	0.898144	-1.11341	124.799	138.953
Cep85	ENSMUSG00000037443	Cep85	0.00111149	0.168006	0.855522	-1.16888	207.333	242.347
Cd72	ENSMUSG00000028459	Cd72	1.3872e-05	0.00514311	0.844853	-1.18364	242.21	286.689
Id3	ENSMUSG00000007872	Id3	1.088e-06	0.000548187	0.788524	-1.26819	181.29	229.911
Fcrla	ENSMUSG00000038421	Fcrla	0.0216557	0.944631	0.922439	-1.08408	273.268	296.245
Ccr7	ENSMUSG00000037944	Ccr7	5.75791e-07	0.000328053	1.29795	1.29795	215.386	165.943
Apoe	ENSMUSG00000002985	Apoe	0.00565851	0.63176	0.829591	-1.20541	134.521	162.153
Ywhah	ENSMUSG00000018965	Ywhah	0.000115051	0.0318415	0.854683	-1.17002	166.778	195.135
Irf8	ENSMUSG00000041515	Irf8	0.0484161	0.944631	0.932685	-1.07217	272.858	292.551
Ptpn6	ENSMUSG00000004266	Ptpn6	0.0190939	0.944631	0.936995	-1.06724	445.682	475.651
Zfp36l2	ENSMUSG00000045817	Zfp36l2	1.83898e-09	2.40906e-06	1.30795	1.30795	215.53	164.785
Cd52	ENSMUSG00000000682	Cd52	0.0259975	0.944631	0.965632	-1.03559	2823.37	2923.86
Zfp706	ENSMUSG00000062397	Zfp706	2.25251e-05	0.00776522	0.880497	-1.13572	299.781	340.468
Fus	ENSMUSG00000030795	Fus	0.000342223	0.0700489	1.14336	1.14336	242.012	211.667
Ighm	ENSMUSG00000076617	Ighm	0.0167599	0.944631	0.959227	-1.04251	1564.83	1631.34
Stap1	ENSMUSG00000029254	Stap1	0.0412257	0.944631	1.0837	1.0837	224.417	207.084
Fkbp4	ENSMUSG00000030357	Fkbp4	0.0316705	0.944631	0.901485	-1.10928	109.52	121.488
Ltb	ENSMUSG00000024399	Ltb	7.86862e-08	5.33167e-05	0.877587	-1.13949	782.326	891.451
Srsf5	ENSMUSG00000021134	Srsf5	0.0336109	0.944631	1.09508	1.09508	150.911	137.808
Gm42031	ENSMUSG00000110386	Gm42031	6.72698e-05	0.0202596	0.833808	-1.19932	154.676	185.505
Unc93b1	ENSMUSG00000036908	Unc93b1	0.000743699	0.121781	0.915966	-1.09174	440.685	481.116
Man1a	ENSMUSG00000003746	Man1a	0.0118049	0.944631	1.07651	1.07651	478.192	444.207
Ncl	ENSMUSG00000026234	Ncl	0.00881095	0.870026	1.09203	1.09203	427.394	391.377
Arl6ip1	ENSMUSG00000030654	Arl6ip1	0.00484682	0.551156	0.930849	-1.07429	438.91	471.516
Stk17b	ENSMUSG00000026094	Stk17b	2.94171e-06	0.00140987	1.14582	1.14582	458.349	400.018
Arhgdia	ENSMUSG00000025132	Arhgdia	0.0224972	0.944631	0.92373	-1.08257	225.225	243.821
Spib	ENSMUSG00000008193	Spib	4.03015e-06	0.00178455	0.818289	-1.22206	168.566	205.998
Klf3	ENSMUSG00000029178	Klf3	0.0440737	0.944631	0.900923	-1.10997	115.018	127.667
Ly6d	ENSMUSG00000034634	Ly6d	0.00277696	0.354333	0.942885	-1.06057	2449.1	2597.45
2410006H16Rik	ENSMUSG00000086841	2410006H16Rik	1.44614e-05	0.00526233	0.874111	-1.14402	407.079	465.707
Vpreb3	ENSMUSG00000000903	Vpreb3	3.99672e-13	1.57071e-09	0.727174	-1.37519	240.592	330.859
Arhgap45	ENSMUSG00000035697	Arhgap45	0.000733781	0.121781	0.902783	-1.10769	383.522	424.822
Rpl6	ENSMUSG00000029614	Rpl6	2.05259e-08	1.92064e-05	1.05959	1.05959	4017.81	3791.86
Fxyd5	ENSMUSG00000009687	Fxyd5	0.00168797	0.238623	1.15876	1.15876	144.633	124.817
Pxk	ENSMUSG00000033885	Pxk	0.0334385	0.944631	0.923175	-1.08322	203.838	220.801
Rpl17	ENSMUSG00000062328	Rpl17	6.80475e-05	0.0202596	1.05347	1.05347	2403.98	2281.97
Fkbp3	ENSMUSG00000020949	Fkbp3	0.0209243	0.944631	1.10364	1.10364	175.46	158.983
Atp2b1	ENSMUSG00000019943	Atp2b1	0.0115778	0.944631	1.13389	1.13389	132.012	116.425
Atp5g3	ENSMUSG00000018770	Atp5g3	0.00194259	0.268816	1.08466	1.08466	496.553	457.797
Rpl41	ENSMUSG00000093674	Rpl41	0.000122221	0.0328991	1.04077	1.04077	6555.1	6298.29
Ucp2	ENSMUSG00000033685	Ucp2	0.00584871	0.642051	0.92535	-1.08067	440.716	476.27
Rps12	ENSMUSG00000061983	Rps12	1.31916e-06	0.000648039	1.0797	1.0797	2320.46	2149.18
Mif4gd	ENSMUSG00000020743	Mif4gd	0.0386738	0.944631	0.932452	-1.07244	265.789	285.043
Cybc1	ENSMUSG00000039294	Cybc1	0.00862874	0.860683	0.877188	-1.14001	96.9494	110.523
Jak1	ENSMUSG00000028530	Jak1	0.00600874	0.654412	0.91367	-1.09449	276.67	302.812
Ftl1	ENSMUSG00000050708	Ftl1	0.0346516	0.944631	0.958649	-1.04313	1217.74	1270.26
Hnrnpd	ENSMUSG00000000568	Hnrnpd	0.00434784	0.517664	1.10466	1.10466	248.894	225.313
Smim14	ENSMUSG00000037822	Smim14	0.000390585	0.07675	0.894583	-1.11784	309.252	345.694
AY036118	ENSMUSG00000105361	AY036118	4.95386e-05	0.0157005	1.13773	1.13773	1407.81	1237.38
Arf5	ENSMUSG00000020440	Arf5	0.00485242	0.551156	0.899048	-1.11229	179.32	199.455
Igkv8-19	ENSMUSG00000096594	Igkv8-19	0.0196998	0.944631	0.730604	-1.36873	92.2107	126.212
H2-Q4	ENSMUSG00000035929	H2-Q4	0.0062399	0.670022	0.887689	-1.12652	145.085	163.441
Cd69	ENSMUSG00000030156	Cd69	0.0330524	0.944631	1.13529	1.13529	126.048	111.027
Cd79b	ENSMUSG00000040592	Cd79b	2.11048e-10	3.19007e-07	0.903893	-1.10633	1786.73	1976.71
Malat1	ENSMUSG00000092341	Malat1	0.00338546	0.423721	1.04348	1.04348	9675.67	9272.53
Samhd1	ENSMUSG00000027639	Samhd1	0.00110182	0.167835	0.887614	-1.12662	259.742	292.63
Iglv1	ENSMUSG00000076934	Iglv1	0.000515056	0.0945874	0.790285	-1.26537	558.765	707.042
Lsm4	ENSMUSG00000031848	Lsm4	0.0488589	0.944631	1.07165	1.07165	250.23	233.5
Inpp4b	ENSMUSG00000037940	Inpp4b	0.0198078	0.944631	1.10342	1.10342	243.923	221.061
Ptpn1	ENSMUSG00000027540	Ptpn1	0.042709	0.944631	0.917727	-1.08965	148.284	161.577
Klf2	ENSMUSG00000055148	Klf2	5.75145e-16	1.13016e-11	0.756983	-1.32103	617.854	816.206
Gm26917	ENSMUSG00000097971	.	0.00754844	0.772535	1.1672	1.1672	127.333	109.092
Rps29	ENSMUSG00000034892	Rps29	0.000829833	0.13045	1.03819	1.03819	3576.68	3445.11
Igkv1-135	ENSMUSG00000096336	Igkv1-135	0.0325583	0.944631	0.804741	-1.24264	426.459	529.933
Atp5a1	ENSMUSG00000025428	Atp5a1	0.0295731	0.944631	1.07614	1.07614	257.445	239.23
Grb2	ENSMUSG00000059923	Grb2	0.0334738	0.944631	0.943035	-1.06041	371.974	394.444
Kmo	ENSMUSG00000039783	Kmo	0.0446956	0.944631	0.89016	-1.12339	84.2229	94.6155
Tgfb1	ENSMUSG00000002603	Tgfb1	0.011113	0.944631	0.909297	-1.09975	224.6	247.003
Tram1	ENSMUSG00000025935	Tram1	0.00358409	0.440171	0.880092	-1.13624	130.162	147.896
Pa2g4	ENSMUSG00000025364	Pa2g4	0.0153457	0.944631	1.10887	1.10887	211.178	190.445
Srsf2	ENSMUSG00000034120	Srsf2	0.000199572	0.044422	1.17709	1.17709	168.213	142.905
Pold4	ENSMUSG00000024854	Pold4	4.19493e-05	0.0139713	0.86916	-1.15054	287.647	330.948
Metap2	ENSMUSG00000036112	Metap2	0.00933925	0.913016	1.12023	1.12023	144.247	128.766
Ptprcap	ENSMUSG00000045826	Ptprcap	0.000215221	0.0469898	0.917947	-1.08939	564.754	615.236
Igkv17-121	ENSMUSG00000076514	Igkv17-121	0.0410195	0.944631	1.27652	1.27652	321.75	252.052
Rps27a	ENSMUSG00000020460	Rps27a	5.30267e-05	0.0165393	1.04218	1.04218	4736.25	4544.57
Rack1	ENSMUSG00000020372	Rack1	0.000428119	0.0824758	1.06645	1.06645	1057.73	991.817
Gpr183	ENSMUSG00000051212	Gpr183	0.000318984	0.0659794	1.17267	1.17267	232.778	198.502
Eef1b2	ENSMUSG00000025967	Eef1b2	0.0187494	0.944631	1.04784	1.04784	892.394	851.65
Maml2	ENSMUSG00000031925	Maml2	0.0321677	0.944631	1.11058	1.11058	164.864	148.448
Tmsb10	ENSMUSG00000079523	Tmsb10	1.80544e-10	2.9564e-07	0.925296	-1.08074	5670.7	6128.53
Rps4x	ENSMUSG00000031320	Rps4x	0.00447531	0.526586	1.03021	1.03021	4597.31	4462.48
Tomm20	ENSMUSG00000093904	Tomm20	0.0171796	0.944631	1.115	1.115	132.429	118.77
Rpl23a	ENSMUSG00000058546	Rpl23a	0.0171295	0.944631	1.06103	1.06103	516.422	486.716
Spi1	ENSMUSG00000002111	Spi1	0.0220132	0.944631	0.903236	-1.10713	117.059	129.6
Rpl13a	ENSMUSG00000074129	Rpl13a	0.0105018	0.944631	1.03435	1.03435	2206.61	2133.34
Rpl3	ENSMUSG00000060036	Rpl3	1.29242e-07	8.1923e-05	1.09586	1.09586	1369.92	1250.08
Tcf3	ENSMUSG00000020167	Tcf3	0.0167266	0.944631	0.891299	-1.12196	103.775	116.432
Nsd3	ENSMUSG00000054823	Nsd3	0.00240775	0.328557	0.8765	-1.1409	129.314	147.535
Rplp0	ENSMUSG00000067274	Rplp0	4.35775e-09	4.75721e-06	1.09253	1.09253	2943.99	2694.65
Cd79a	ENSMUSG00000003379	Cd79a	3.46042e-14	1.69993e-10	0.915417	-1.0924	3472.23	3793.06
Eif4ebp2	ENSMUSG00000020091	Eif4ebp2	0.0237976	0.944631	0.903494	-1.10681	118.734	131.416
Pole4	ENSMUSG00000030042	Pole4	0.00715494	0.743887	1.11336	1.11336	189.376	170.094
mt-Co1	ENSMUSG00000064351	mt-Co1	1.77711e-05	0.00634913	0.945749	-1.05736	3317.53	3507.83
Plekha2	ENSMUSG00000031557	Plekha2	0.0127507	0.944631	0.902266	-1.10832	156.335	173.269
Atp5k	ENSMUSG00000050856	Atp5k	0.0495683	0.944631	1.08015	1.08015	186.697	172.844
Mcl1	ENSMUSG00000038612	Mcl1	2.31023e-07	0.000141863	0.862927	-1.15885	409.402	474.434
Rpl37a	ENSMUSG00000046330	Rpl37a	4.09597e-06	0.00178455	1.0588	1.0588	3378.21	3190.61
Psmb9	ENSMUSG00000096727	Psmb9	0.00971684	0.944631	0.911955	-1.09654	226.137	247.97
Uqcrb	ENSMUSG00000021520	Uqcrb	0.00437314	0.517664	1.10536	1.10536	237.443	214.81
Prdx1	ENSMUSG00000028691	Prdx1	0.00771788	0.785784	1.08442	1.08442	379.102	349.588
Rasa3	ENSMUSG00000031453	Rasa3	0.000714344	0.119973	0.850238	-1.17614	128.528	151.167
Arpc3	ENSMUSG00000029465	Arpc3	0.0392114	0.944631	0.949467	-1.05322	438.063	461.378
Rps3	ENSMUSG00000030744	Rps3	0.000351593	0.0712248	1.03973	1.03973	3031.99	2916.14
Cytip	ENSMUSG00000026832	Cytip	0.00846454	0.852965	1.09972	1.09972	268.855	244.477
Ppig	ENSMUSG00000042133	Ppig	0.0420581	0.944631	1.10042	1.10042	123.151	111.913
Dnajb1	ENSMUSG00000005483	Dnajb1	0.000201199	0.044422	0.804381	-1.24319	79.0665	98.2949
Frg1	ENSMUSG00000031590	Frg1	0.0246495	0.944631	0.899357	-1.1119	101.724	113.107
Rps21	ENSMUSG00000039001	Rps21	0.000142966	0.0364843	1.04141	1.04141	4411.52	4236.1
Igkv8-27	ENSMUSG00000076580	Igkv8-27	0.0113597	0.944631	0.771162	-1.29674	140.76	182.53
Eif2s2	ENSMUSG00000074656	Eif2s2	0.020743	0.944631	1.0939	1.0939	217.552	198.877
Ppia	ENSMUSG00000071866	Ppia	4.17756e-06	0.00178455	1.07275	1.07275	2304.86	2148.55
Snrnp70	ENSMUSG00000063511	Snrnp70	0.0312445	0.944631	1.0875	1.0875	194.424	178.78
Rp9	ENSMUSG00000032239	Rp9	0.000793103	0.126703	0.878972	-1.13769	179.083	203.741
Otulin	ENSMUSG00000046034	Otulin	0.0156992	0.944631	0.900066	-1.11103	143.145	159.038
Arhgap17	ENSMUSG00000030766	Arhgap17	0.0217814	0.944631	0.909796	-1.09915	162.954	179.111
Rpl28	ENSMUSG00000030432	Rpl28	0.0368028	0.944631	1.02813	1.02813	2668.09	2595.1
mt-Atp6	ENSMUSG00000064357	mt-Atp6	0.0362717	0.944631	1.03067	1.03067	1930.87	1873.41
Zcchc7	ENSMUSG00000035649	Zcchc7	0.00246002	0.331747	0.879794	-1.13663	158.38	180.019
Elf1	ENSMUSG00000036461	Elf1	0.00455051	0.532248	0.910069	-1.09882	247.645	272.117
Cmtm7	ENSMUSG00000032436	Cmtm7	0.0288998	0.944631	0.915158	-1.09271	166.403	181.829
Npm1	ENSMUSG00000057113	Npm1	0.000471035	0.0881508	1.09895	1.09895	678.532	617.438
Rpl34	ENSMUSG00000062006	Rpl34	0.0013312	0.193764	1.03317	1.03317	4087.34	3956.12
Ankrd11	ENSMUSG00000035569	Ankrd11	0.0478116	0.944631	0.933307	-1.07146	244.912	262.414
Eif1	ENSMUSG00000035530	Eif1	0.0153304	0.944631	0.965627	-1.0356	1667.43	1726.78
H2afz	ENSMUSG00000037894	.	0.0436803	0.944631	0.931881	-1.0731	263.292	282.538
Nol7	ENSMUSG00000063200	Nol7	0.0127501	0.944631	0.922715	-1.08376	269.159	291.703
Cdk13	ENSMUSG00000041297	Cdk13	0.0448526	0.944631	0.916424	-1.0912	139.572	152.301
Rpl35a	ENSMUSG00000060636	Rpl35a	0.00265871	0.350629	1.02907	1.02907	4563.64	4434.74
Xiap	ENSMUSG00000025860	Xiap	0.0426958	0.944631	0.90829	-1.10097	111.005	122.213
Rps16	ENSMUSG00000037563	Rps16	0.000757058	0.122944	1.03117	1.03117	5371.44	5209.07
Rps27l	ENSMUSG00000036781	Rps27l	0.0270158	0.944631	1.11196	1.11196	125.751	113.089
Ptp4a3	ENSMUSG00000059895	Ptp4a3	0.0216901	0.944631	0.917224	-1.09025	206.536	225.176
Kcnq5	ENSMUSG00000028033	Kcnq5	0.00336488	0.423721	1.15097	1.15097	201.882	175.402
Cerk	ENSMUSG00000035891	Cerk	0.001214	0.18072	0.853793	-1.17124	116.392	136.324
Med13	ENSMUSG00000034297	Med13	0.0461042	0.944631	0.907305	-1.10217	104.384	115.049
Csnk1a1	ENSMUSG00000024576	Csnk1a1	0.0431518	0.944631	0.918734	-1.08845	145.147	157.985
Kmt2e	ENSMUSG00000029004	Kmt2e	0.01664	0.944631	0.923359	-1.083	273.688	296.405
Rpl38	ENSMUSG00000057322	Rpl38	0.000168862	0.0414768	1.03898	1.03898	4305.85	4144.29
Chd3	ENSMUSG00000018474	Chd3	0.0209221	0.944631	0.893737	-1.1189	116.753	130.634
Rpl27	ENSMUSG00000063316	Rpl27	0.000201138	0.044422	1.05174	1.05174	1919.46	1825.04
Iglv2	ENSMUSG00000076940	Iglv2	0.0436039	0.944631	0.847066	-1.18055	250.345	295.544
Ms4a1	ENSMUSG00000024673	Ms4a1	0.00496746	0.560981	0.941393	-1.06226	881.342	936.211
Gimap5	ENSMUSG00000043505	Gimap5	0.0230756	0.944631	0.899731	-1.11144	128.879	143.242
Shisa5	ENSMUSG00000025647	Shisa5	0.000591425	0.106619	1.08128	1.08128	758.862	701.815
Sdc4	ENSMUSG00000017009	Sdc4	0.0445344	0.944631	0.9199	-1.08707	174.114	189.275
Atp5g2	ENSMUSG00000062683	Atp5g2	0.0066988	0.703911	1.06448	1.06448	644.686	605.636
Dbnl	ENSMUSG00000020476	Dbnl	0.00997687	0.944631	0.89473	-1.11766	142.326	159.072
Pax5	ENSMUSG00000014030	Pax5	0.0228802	0.944631	0.937462	-1.06671	394.342	420.648
Cd74	ENSMUSG00000024610	Cd74	5.84319e-07	0.000328053	0.958689	-1.04309	27876.8	29078.1
Snx20	ENSMUSG00000031662	Snx20	0.0440906	0.944631	0.911618	-1.09695	116.568	127.869
Serbp1	ENSMUSG00000036371	Serbp1	0.0198245	0.944631	1.0708	1.0708	405.595	378.779
Limd2	ENSMUSG00000040699	Limd2	0.0173926	0.944631	0.941791	-1.06181	538.892	572.199
Rpl36a	ENSMUSG00000079435	Rpl36a	0.000182807	0.043279	1.06036	1.06036	1861.4	1755.44
Rpl22	ENSMUSG00000028936	Rpl22	0.0137513	0.944631	1.03111	1.03111	2336.46	2265.98
Stk38	ENSMUSG00000024006	Stk38	0.0124821	0.944631	0.88132	-1.13466	97.4996	110.629
Rubcnl	ENSMUSG00000034959	Rubcnl	0.0130471	0.944631	0.885676	-1.12908	98.4241	111.129
Immp2l	ENSMUSG00000056899	Immp2l	0.00249865	0.331747	1.13634	1.13634	227.572	200.267
Ifi27	ENSMUSG00000064215	Ifi27	0.0393645	0.944631	1.13748	1.13748	97.7125	85.9027
Vdac2	ENSMUSG00000021771	Vdac2	0.0342114	0.944631	1.09085	1.09085	164.549	150.845
Ppp1cc	ENSMUSG00000004455	Ppp1cc	0.0120978	0.944631	0.913358	-1.09486	206.964	226.597
Rplp1	ENSMUSG00000007892	Rplp1	5.36631e-07	0.000319539	1.06672	1.06672	3001.3	2813.58
Nop58	ENSMUSG00000026020	Nop58	0.0222053	0.944631	1.13752	1.13752	112.664	99.0439
Add1	ENSMUSG00000029106	Add1	0.0450676	0.944631	0.911358	-1.09726	127.428	139.822
Cd83	ENSMUSG00000015396	Cd83	0.00345054	0.42692	1.15315	1.15315	269.468	233.679
Ppdpf	ENSMUSG00000016344	Ppdpf	0.00178902	0.251102	0.904466	-1.10562	282.776	312.645
Btf3	ENSMUSG00000021660	Btf3	0.0041485	0.50011	1.06528	1.06528	656.554	616.319
Crip1	ENSMUSG00000006360	Crip1	0.000810449	0.12843	0.90481	-1.1052	876.502	968.714
Rpl29	ENSMUSG00000048758	Rpl29	8.48062e-05	0.0245065	1.0609	1.0609	1937.26	1826.05
Rps3a1	ENSMUSG00000028081	Rps3a1	0.00647974	0.68766	1.0249	1.0249	4948.91	4828.68
Cdkn2d	ENSMUSG00000096472	Cdkn2d	0.0207801	0.944631	0.852496	-1.17303	70.9412	83.2159
Btg2	ENSMUSG00000020423	Btg2	0.000606582	0.108358	0.863022	-1.15872	165.136	191.346
Ndufb2	ENSMUSG00000002416	Ndufb2	0.0270054	0.944631	1.10748	1.10748	123.078	111.134
H3f3a	ENSMUSG00000060743	H3f3a	3.64093e-09	4.20849e-06	0.907499	-1.10193	1825.15	2011.19
Rps24	ENSMUSG00000025290	Rps24	0.000186199	0.0435573	1.03124	1.03124	10321.8	10009.2
Cbx3	ENSMUSG00000029836	Cbx3	0.0278491	0.944631	0.912846	-1.09547	150.443	164.806
Gimap1	ENSMUSG00000090019	Gimap1	0.0126734	0.944631	0.931777	-1.07322	399.075	428.295
Trim59	ENSMUSG00000034317	Trim59	0.00532741	0.598192	0.853028	-1.17229	81.9493	96.0687
Cox6a1	ENSMUSG00000041697	Cox6a1	0.0214713	0.944631	1.0779	1.0779	274.376	254.547
Rpl18	ENSMUSG00000059070	Rpl18	0.00719747	0.74437	1.02837	1.02837	4055.62	3943.74
Prr5	ENSMUSG00000036106	Prr5	0.0493293	0.944631	0.903412	-1.10691	91.046	100.78
Atp5g1	ENSMUSG00000006057	Atp5g1	0.000176909	0.0423935	1.14572	1.14572	272.559	237.894
Rpl36	ENSMUSG00000057863	Rpl36	0.0247816	0.944631	1.02456	1.02456	3768.14	3677.8
Gm26740	ENSMUSG00000097705	Gm26740	0.0224276	0.944631	0.926264	-1.07961	280.042	302.335
Siglecg	ENSMUSG00000030468	Siglecg	0.000124276	0.0330004	0.867487	-1.15276	214.987	247.828
Eef1g	ENSMUSG00000071644	Eef1g	0.0406783	0.944631	1.06101	1.06101	398.001	375.117
Stt3b	ENSMUSG00000032437	Stt3b	0.0337641	0.944631	1.10979	1.10979	127.503	114.89
Ubxn1	ENSMUSG00000071655	Ubxn1	0.0125724	0.944631	0.906281	-1.10341	167.939	185.305
Fcmr	ENSMUSG00000042474	Fcmr	0.012457	0.944631	0.937133	-1.06708	698.623	745.489
Dok3	ENSMUSG00000035711	Dok3	0.000142773	0.0364843	0.861009	-1.16143	189.573	220.176
Fth1	ENSMUSG00000024661	Fth1	0.000119336	0.0325689	0.944171	-1.05913	2683.78	2842.47
Syk	ENSMUSG00000021457	Syk	0.00319913	0.405567	0.916507	-1.0911	394.095	429.997
Rpl9	ENSMUSG00000047215	Rpl9	0.000229086	0.0494674	1.03628	1.03628	4597.93	4436.96
Sat1	ENSMUSG00000025283	Sat1	0.00270946	0.350829	0.87676	-1.14056	146.452	167.038
Rps19	ENSMUSG00000040952	Rps19	2.22087e-08	1.98364e-05	1.07497	1.07497	2803.8	2608.26
Plek	ENSMUSG00000020120	Plek	0.0172292	0.944631	1.11763	1.11763	146.29	130.893
Gnas	ENSMUSG00000027523	Gnas	0.0261995	0.944631	0.949523	-1.05316	559.509	589.253
Iglc2	ENSMUSG00000076937	Iglc2	7.80102e-07	0.000414297	0.892117	-1.12093	1247.02	1397.82
Rps7	ENSMUSG00000061477	Rps7	0.00127005	0.187643	1.03238	1.03238	5152.68	4991.09
Treml2	ENSMUSG00000071068	Treml2	0.0233768	0.944631	0.876376	-1.14106	86.7274	98.9615
Rbm39	ENSMUSG00000027620	Rbm39	0.026804	0.944631	0.954247	-1.04795	650.685	681.883
Csk	ENSMUSG00000032312	Csk	0.000766436	0.123446	0.892694	-1.1202	237.782	266.364
Rpl4	ENSMUSG00000032399	Rpl4	0.000256355	0.054754	1.08397	1.08397	666.245	614.635
Traf3ip3	ENSMUSG00000037318	Traf3ip3	0.0129771	0.944631	0.891734	-1.12141	115.349	129.354
Igkv3-12	ENSMUSG00000094117	Igkv3-12	0.0225446	0.944631	0.738146	-1.35475	105.675	143.163
Rpl30	ENSMUSG00000058600	Rpl30	0.00105861	0.163469	1.03233	1.03233	4841.75	4690.13
Rps13	ENSMUSG00000090862	Rps13	0.000447787	0.084606	1.0361	1.0361	3985.45	3846.6
Rpl10	ENSMUSG00000008682	Rpl10	0.0244762	0.944631	1.03324	1.03324	1963.01	1899.85
Rps2	ENSMUSG00000044533	Rps2	2.3397e-08	1.99891e-05	1.0835	1.0835	3542.38	3269.38
Rps15a	ENSMUSG00000008683	Rps15a	0.0123191	0.944631	1.02577	1.02577	4525.78	4412.09
Btla	ENSMUSG00000052013	Btla	0.0461485	0.944631	1.07183	1.07183	331.314	309.11
mt-Cytb	ENSMUSG00000064370	mt-Cytb	0.00248258	0.331747	1.04708	1.04708	2338.23	2233.1
Ssr4	ENSMUSG00000002014	Ssr4	0.0169501	0.944631	1.09929	1.09929	201.668	183.453
Rpl21	ENSMUSG00000041453	Rpl21	0.00706903	0.738864	1.02507	1.02507	5058.95	4935.22
Rpl13	ENSMUSG00000000740	Rpl13	5.40837e-09	5.5934e-06	1.05652	1.05652	6665.75	6309.15
Map4k1	ENSMUSG00000037337	Map4k1	0.00118359	0.177539	0.8708	-1.14837	157.554	180.93
Rps28	ENSMUSG00000067288	Rps28	0.0486591	0.944631	1.02228	1.02228	3581.9	3503.83
Syf2	ENSMUSG00000028821	Syf2	0.041797	0.944631	0.913903	-1.09421	122.142	133.648
Foxo1	ENSMUSG00000044167	Foxo1	0.0438012	0.944631	0.918045	-1.08927	154.621	168.425
Nme1	ENSMUSG00000037601	Nme1	0.000743149	0.121781	1.14475	1.14475	263.856	230.493
Lsm7	ENSMUSG00000035215	Lsm7	0.00402177	0.487826	1.13507	1.13507	151.692	133.641
Rpl23	ENSMUSG00000071415	Rpl23	3.89008e-08	3.0576e-05	1.05807	1.05807	4767.11	4505.46
Smdt1	ENSMUSG00000022452	Smdt1	0.0326784	0.944631	0.915661	-1.09211	152.705	166.771
Btg1	ENSMUSG00000036478	Btg1	0.00345447	0.42692	0.934848	-1.06969	758.731	811.609
Rsbn1l	ENSMUSG00000039968	Rsbn1l	0.039071	0.944631	0.913244	-1.095	124.96	136.831
H2afv	ENSMUSG00000041126	.	0.0392642	0.944631	0.918513	-1.08872	155.31	169.089
B3gat3	ENSMUSG00000071649	B3gat3	0.0399021	0.944631	0.875966	-1.1416	74.4444	84.9855
Mtdh	ENSMUSG00000022255	Mtdh	0.00480493	0.551156	1.10113	1.10113	270.447	245.608
Blnk	ENSMUSG00000061132	Blnk	0.00167363	0.238311	1.08953	1.08953	430.977	395.562
Rps8	ENSMUSG00000047675	Rps8	0.000707258	0.119807	1.03041	1.03041	7610.95	7386.31
Rac2	ENSMUSG00000033220	Rac2	0.00193725	0.268816	0.941484	-1.06215	870.466	924.568
Tsc22d4	ENSMUSG00000029723	Tsc22d4	0.000198507	0.044422	0.863135	-1.15857	175.103	202.869
Psmb3	ENSMUSG00000069744	Psmb3	0.0107175	0.944631	1.08627	1.08627	272.411	250.776
Rps20	ENSMUSG00000028234	Rps20	8.01405e-05	0.0235039	1.03878	1.03878	7796.75	7505.68
Itm2b	ENSMUSG00000022108	Itm2b	0.0134239	0.944631	0.944628	-1.05862	547.396	579.483
Rpl24	ENSMUSG00000098274	Rpl24	0.0386455	0.944631	1.02847	1.02847	2152.05	2092.48
Rpsa	ENSMUSG00000032518	Rpsa	1.97487e-09	2.42539e-06	1.06838	1.06838	5201.93	4868.98
Eef1a1	ENSMUSG00000037742	Eef1a1	0.00861703	0.860683	1.03087	1.03087	3923.55	3806.07
Rpl7	ENSMUSG00000043716	Rpl7	5.60253e-06	0.00229354	1.07143	1.07143	1499.97	1399.96
Rps15	ENSMUSG00000063457	Rps15	4.60788e-05	0.0150908	1.07725	1.07725	1027.64	953.947
Cdk12	ENSMUSG00000003119	Cdk12	0.0440509	0.944631	0.907299	-1.10217	100.21	110.448
Eif4a1	ENSMUSG00000059796	Eif4a1	0.0259528	0.944631	1.08628	1.08628	281.037	258.715
Arpc5l	ENSMUSG00000026755	Arpc5l	0.0240215	0.944631	0.931737	-1.07326	312.102	334.968
Arf4	ENSMUSG00000021877	Arf4	0.0130979	0.944631	0.894808	-1.11756	110.171	123.123
Cr2	ENSMUSG00000026616	Cr2	0.00276787	0.354333	1.12039	1.12039	380.473	339.59
Srsf9	ENSMUSG00000029538	Srsf9	0.0200478	0.944631	0.90005	-1.11105	110.568	122.846
Tut4	ENSMUSG00000034610	Tut4	0.00131475	0.192797	0.900996	-1.10988	277.184	307.642
B3gnt5	ENSMUSG00000022686	B3gnt5	0.0147453	0.944631	0.891084	-1.12223	115.257	129.344
E330020D12Rik	ENSMUSG00000073538	E330020D12Rik	0.0224432	0.944631	0.885613	-1.12916	122.358	138.162
Snrpf	ENSMUSG00000020018	Snrpf	0.00430583	0.515912	1.1115	1.1115	232.773	209.422
Sec11c	ENSMUSG00000024516	Sec11c	0.00471771	0.547171	0.897851	-1.11377	188.798	210.278
Prdx5	ENSMUSG00000024953	Prdx5	0.0474882	0.944631	0.914735	-1.09321	124.972	136.621
Rpl7a	ENSMUSG00000062647	Rpl7a	2.34545e-05	0.00794624	1.07085	1.07085	1394.9	1302.62
Rpl14	ENSMUSG00000025794	Rpl14	8.80319e-05	0.02507	1.06347	1.06347	1548.77	1456.33
Gimap9	ENSMUSG00000051124	Gimap9	0.0145924	0.944631	0.884593	-1.13046	95.3562	107.797
Iglc1	ENSMUSG00000105906	Iglc1	3.61004e-08	2.95572e-05	0.752963	-1.32809	209.045	277.63
Tbca	ENSMUSG00000042043	Tbca	0.0112991	0.944631	1.09588	1.09588	221.385	202.017
Cirbp	ENSMUSG00000045193	Cirbp	0.0087877	0.870026	0.88898	-1.12488	119.857	134.825
Rpl5	ENSMUSG00000058558	Rpl5	0.00748852	0.770415	1.0521	1.0521	880.141	836.554
Oaz1	ENSMUSG00000035242	Oaz1	0.000375487	0.0745285	0.938968	-1.065	941.297	1002.48
Ranbp1	ENSMUSG00000005732	Ranbp1	0.00823526	0.834138	1.13214	1.13214	173.11	152.905
Rpl11	ENSMUSG00000059291	Rpl11	8.55097e-06	0.00336053	1.05044	1.05044	3385.6	3223.04
Rps5	ENSMUSG00000012848	Rps5	6.25347e-05	0.0192001	1.04382	1.04382	4231.27	4053.64
Sesn1	ENSMUSG00000038332	Sesn1	5.62587e-08	4.05355e-05	1.24596	1.24596	243.305	195.276
Rps23	ENSMUSG00000049517	Rps23	0.000645258	0.113208	1.04909	1.04909	1900.54	1811.61
Msn	ENSMUSG00000031207	Msn	0.010232	0.944631	0.938075	-1.06601	519.811	554.126
Mylip	ENSMUSG00000038175	Mylip	0.00602791	0.654412	0.869262	-1.1504	98.4205	113.223
Eif3f	ENSMUSG00000031029	Eif3f	0.038873	0.944631	0.959814	-1.04187	758.981	790.758
Btk	ENSMUSG00000031264	Btk	0.0103906	0.944631	0.897994	-1.11359	149.851	166.873
Selenow	ENSMUSG00000041571	Selenow	0.011209	0.944631	1.06647	1.06647	510.139	478.345
Pten	ENSMUSG00000013663	Pten	0.0168726	0.944631	0.92185	-1.08478	257.524	279.356
Hck	ENSMUSG00000003283	Hck	0.0468632	0.944631	0.885319	-1.12954	89.2659	100.829
Rpl15	ENSMUSG00000012405	Rpl15	0.000260481	0.055037	1.05416	1.05416	1825.66	1731.85
Gm47283	ENSMUSG00000096768	Gm47283	0.0364015	0.944631	1.12919	1.12919	112.671	99.7805
Stx7	ENSMUSG00000019998	Stx7	0.0256594	0.944631	0.896442	-1.11552	96.0494	107.145
Fbl	ENSMUSG00000046865	Fbl	1.02261e-05	0.0038643	1.21165	1.21165	212.233	175.16
Rpl10a	ENSMUSG00000037805	Rpl10a	0.000153492	0.0381786	1.05539	1.05539	2196.07	2080.82
Actb	ENSMUSG00000029580	Actb	9.4514e-11	1.68836e-07	0.925816	-1.08013	6930.27	7485.59
Lbh	ENSMUSG00000024063	Lbh	0.000489541	0.0907498	0.872888	-1.14562	190.953	218.76
Rps18	ENSMUSG00000008668	Rps18	5.77606e-08	4.05355e-05	1.09161	1.09161	1713.77	1569.94
Rps14	ENSMUSG00000024608	Rps14	0.0476281	0.944631	1.02788	1.02788	1786.64	1738.18
Llph	ENSMUSG00000020224	Llph	0.0237401	0.944631	1.09676	1.09676	182.627	166.515
S1pr1	ENSMUSG00000045092	S1pr1	0.00271379	0.350829	0.865474	-1.15544	110.453	127.621
Ube2i	ENSMUSG00000015120	Ube2i	0.0117848	0.944631	1.09128	1.09128	242.776	222.469
Gm15987	ENSMUSG00000085786	Gm15987	0.0278923	0.944631	0.909639	-1.09934	191.883	210.944
Pml	ENSMUSG00000036986	Pml	0.0446219	0.944631	0.908231	-1.10104	121.608	133.896
B3gnt8	ENSMUSG00000059479	B3gnt8	0.0120217	0.944631	0.855476	-1.16894	78.1416	91.3429
Rps6	ENSMUSG00000028495	Rps6	0.000370419	0.0742729	1.0769	1.0769	825.931	766.951
Cnbp	ENSMUSG00000030057	Cnbp	0.0408798	0.944631	1.054	1.054	450.946	427.841
Cotl1	ENSMUSG00000031827	Cotl1	0.0411948	0.944631	0.913947	-1.09416	155.493	170.134
Rpl22l1	ENSMUSG00000039221	Rpl22l1	0.00232992	0.32016	1.0861	1.0861	512.883	472.225
Ywhaz	ENSMUSG00000022285	Ywhaz	0.000582692	0.106018	0.921481	-1.08521	543.582	589.9
Arhgap24	ENSMUSG00000057315	Arhgap24	0.0102707	0.944631	0.865142	-1.15588	110.085	127.245
Fau	ENSMUSG00000038274	Fau	0.00610655	0.659306	0.976029	-1.02456	10113.4	10361.8
Rchy1	ENSMUSG00000029397	Rchy1	0.0221954	0.944631	0.897183	-1.1146	103.06	114.87
Igkv1-122	ENSMUSG00000095497	Igkv1-122	0.00249388	0.331747	1.28689	1.28689	119.007	92.4764
Bcl6	ENSMUSG00000022508	Bcl6	0.0419468	0.944631	0.859441	-1.16355	72.6128	84.4884
Bloc1s1	ENSMUSG00000090247	Bloc1s1	0.0259302	0.944631	0.899975	-1.11114	108.527	120.589
Mrpl23	ENSMUSG00000037772	Mrpl23	0.000671281	0.116732	1.14829	1.14829	192.701	167.815
C1qbp	ENSMUSG00000018446	C1qbp	0.000704217	0.119807	1.18167	1.18167	149.249	126.303
Pcmt1	ENSMUSG00000019795	Pcmt1	0.0366126	0.944631	0.886201	-1.12841	83.1017	93.773
Dennd1b	ENSMUSG00000056268	Dennd1b	0.0267851	0.944631	0.894616	-1.1178	98.112	109.669
Crebrf	ENSMUSG00000048249	Crebrf	0.0291332	0.944631	0.900045	-1.11106	108.68	120.749
AW112010	ENSMUSG00000075010	AW112010	0.0466376	0.944631	0.892281	-1.12072	90.2689	101.166
Rps26	ENSMUSG00000025362	Rps26	0.0149336	0.944631	1.02812	1.02812	4115.51	4002.94
Rfc1	ENSMUSG00000029191	Rfc1	0.0232768	0.944631	0.896893	-1.11496	108.254	120.699
Rnase6	ENSMUSG00000021880	Rnase6	0.00648343	0.68766	0.889557	-1.12416	145.054	163.063
Tubb4b	ENSMUSG00000036752	Tubb4b	0.0379835	0.944631	1.09277	1.09277	182.202	166.734
Hnrnpdl	ENSMUSG00000029328	Hnrnpdl	0.000417585	0.0812431	1.15671	1.15671	176.642	152.71
Tsc22d3	ENSMUSG00000031431	Tsc22d3	8.73516e-08	5.72153e-05	1.22372	1.22372	398.137	325.351
Pdcd5	ENSMUSG00000030417	Pdcd5	0.011163	0.944631	1.11565	1.11565	151.671	135.948
Stk4	ENSMUSG00000018209	Stk4	0.0047338	0.547171	0.899486	-1.11175	192.811	214.357
Rpl35	ENSMUSG00000062997	Rpl35	0.00569183	0.63189	1.03726	1.03726	2522.82	2432.21
Irf1	ENSMUSG00000018899	Irf1	0.0451408	0.944631	0.886736	-1.12773	92.7354	104.581
Tox4	ENSMUSG00000016831	Tox4	0.0385877	0.944631	0.884754	-1.13026	80.8509	91.3824
Sh3glb1	ENSMUSG00000037062	Sh3glb1	0.0142354	0.944631	0.914834	-1.09309	211.732	231.443
Zbtb7a	ENSMUSG00000035011	Zbtb7a	0.000445398	0.084606	0.858853	-1.16434	129.367	150.627
Ndufb1-ps	ENSMUSG00000113902	.	0.0454418	0.944631	0.941372	-1.06228	308.225	327.421
Il4ra	ENSMUSG00000030748	Il4ra	0.0322142	0.944631	0.894094	-1.11845	89.5257	100.13
Rplp2	ENSMUSG00000025508	Rplp2	2.02014e-05	0.00708853	1.05495	1.05495	2600.51	2465.05
Ncoa3	ENSMUSG00000027678	Ncoa3	0.0383515	0.944631	0.899136	-1.11218	92.7975	103.207
Paip2	ENSMUSG00000037058	Paip2	0.00268989	0.350829	0.886983	-1.12742	163.381	184.199
Rpl32	ENSMUSG00000057841	Rpl32	0.000146614	0.0369354	1.04841	1.04841	3435.08	3276.47
Nme2	ENSMUSG00000020857	Nme2	4.49634e-06	0.00187985	1.13256	1.13256	648.743	572.813
Ldb1	ENSMUSG00000025223	Ldb1	0.00576513	0.636432	0.86283	-1.15898	86.1862	99.8878
Rpl26	ENSMUSG00000060938	Rpl26	0.00368448	0.44969	1.04317	1.04317	1707.71	1637.04
Tnfrsf13c	ENSMUSG00000068105	Tnfrsf13c	4.82511e-10	6.77239e-07	0.811015	-1.23302	288.182	355.335
Igkv14-100	ENSMUSG00000096515	Igkv14-100	0.0301177	0.944631	1.31556	1.31556	131.476	99.939
Reep5	ENSMUSG00000005873	Reep5	3.71346e-06	0.00173737	0.843962	-1.18489	209.093	247.752

## Sheet: Spleen_GC_HF vs sham
Gene ID	Ensembl ID	Gene name	P-value	FDR step up	Ratio	Fold change	LSMean(HF)	LSMean(sham)		Genes differentially expressed in antigen processing and presentation
Sptbn1	ENSMUSG00000020315	Sptbn1	4.63025e-05	0.905446	2.73859	2.73859	237.454	86.7067		Gene Symbol	Gene Description
Cdk8	ENSMUSG00000029635	Cdk8	0.000135186	0.999315	0.494159	-2.02364	3326.47	6731.57		HLA-DMA	major histocompatibility complex, class II, DM alpha
Laptm5	ENSMUSG00000028581	Laptm5	0.000414197	0.999315	0.498151	-2.00742	307.639	617.562		HLA-DQA1	major histocompatibility complex, class II, DQ alpha 1
Mybl1	ENSMUSG00000025912	Mybl1	0.000508306	0.999315	0.316006	-3.16449	103.35	327.049		CIITA	class II major histocompatibility complex transactivator
Apoe	ENSMUSG00000002985	Apoe	0.000528862	0.999315	0.299394	-3.34008	131.954	440.738		CTSB	cathepsin B
Grk5	ENSMUSG00000003228	Grk5	0.00109403	0.999315	3.64826	3.64826	198.902	54.5197		HSPA5	heat shock protein family A (Hsp70) member 5
Cmah	ENSMUSG00000016756	Cmah	0.00151165	0.999315	2.41002	2.41002	381.529	158.309		CALR	calreticulin
Jund	ENSMUSG00000071076	Jund	0.00167061	0.999315	1.74665	1.74665	669.213	383.141		CD74	CD74 molecule
Tmcc3	ENSMUSG00000020023	Tmcc3	0.00194328	0.999315	3.27127	3.27127	196.384	60.033
Cerk	ENSMUSG00000035891	Cerk	0.00194678	0.999315	0.450948	-2.21755	137.323	304.521
Tcea1	ENSMUSG00000033813	Tcea1	0.00213404	0.999315	0.48878	-2.04591	160.613	328.599
Trim35	ENSMUSG00000022043	Trim35	0.00251338	0.999315	0.410042	-2.43877	64.9621	158.428
Ankrd44	ENSMUSG00000052331	Ankrd44	0.00288297	0.999315	1.79059	1.79059	572.388	319.665
Sik1	ENSMUSG00000024042	Sik1	0.00351817	0.999315	2.85224	2.85224	210.93	73.9523
Grn	ENSMUSG00000034708	Grn	0.00372129	0.999315	2.80868	2.80868	150.001	53.4062
Rps20	ENSMUSG00000028234	Rps20	0.00400496	0.999315	0.579928	-1.72435	2691.2	4640.57
Tmf1	ENSMUSG00000030059	Tmf1	0.00409747	0.999315	0.433091	-2.30898	59.0337	136.308
Maml2	ENSMUSG00000031925	Maml2	0.00413879	0.999315	2.48635	2.48635	398.565	160.301
Nedd9	ENSMUSG00000021365	Nedd9	0.00417744	0.999315	1.75536	1.75536	683.854	389.579
Tmed10	ENSMUSG00000021248	Tmed10	0.00454437	0.999315	1.87177	1.87177	299.504	160.011
Aff1	ENSMUSG00000029313	Aff1	0.00517582	0.999315	2.36313	2.36313	235.244	99.5478
Cd79a	ENSMUSG00000003379	Cd79a	0.00573292	0.999315	0.643986	-1.55283	1215.88	1888.05
Tnrc6b	ENSMUSG00000047888	Tnrc6b	0.00645389	0.999315	1.77181	1.77181	503.326	284.074
Mybbp1a	ENSMUSG00000040463	Mybbp1a	0.00687677	0.999315	2.13235	2.13235	134.674	63.1577
Gpatch2	ENSMUSG00000039210	Gpatch2	0.00697873	0.999315	2.37125	2.37125	124.213	52.3827
Apobec1	ENSMUSG00000040613	Apobec1	0.00713201	0.999315	0.49169	-2.0338	113.389	230.611
Dleu2	ENSMUSG00000097589	Dleu2	0.00744869	0.999315	0.488356	-2.04769	212.802	435.753
Adgre5	ENSMUSG00000002885	Adgre5	0.00774407	0.999315	2.11763	2.11763	178.412	84.2506
Ccm2	ENSMUSG00000000378	Ccm2	0.0083684	0.999315	0.504861	-1.98074	90.9788	180.206
H2-Aa	ENSMUSG00000036594	H2-Aa	0.00861687	0.999315	0.646331	-1.5472	1428.86	2210.72
Nap1l1	ENSMUSG00000058799	Nap1l1	0.00878702	0.999315	0.55529	-1.80086	245.456	442.032
Mprip	ENSMUSG00000005417	Mprip	0.00886232	0.999315	0.424114	-2.35786	75.3571	177.681
Stk17b	ENSMUSG00000026094	Stk17b	0.0088662	0.999315	1.76642	1.76642	343.325	194.362
Sel1l	ENSMUSG00000020964	Sel1l	0.00905135	0.999315	2.32669	2.32669	532.34	228.797
Rev1	ENSMUSG00000026082	Rev1	0.00930626	0.999315	0.480493	-2.0812	99.6846	207.463
Vars	ENSMUSG00000007029	Vars	0.00933823	0.999315	1.78747	1.78747	229.985	128.665
Arpc5l	ENSMUSG00000026755	Arpc5l	0.0100176	0.999315	0.583304	-1.71437	261.326	448.01
Aff3	ENSMUSG00000037138	Aff3	0.0101335	0.999315	2.13762	2.13762	810.702	379.254
Rps11	ENSMUSG00000003429	Rps11	0.0106018	0.999315	0.602778	-1.65899	1218.35	2021.22
H2-DMa	ENSMUSG00000037649	H2-DMa	0.0109037	0.999315	0.534809	-1.86983	143.805	268.89
Tspan14	ENSMUSG00000037824	Tspan14	0.0109571	0.999315	2.07345	2.07345	153.084	73.8307
Dock2	ENSMUSG00000020143	Dock2	0.0109866	0.999315	1.65675	1.65675	2719.51	1641.47
Rapgef2	ENSMUSG00000062232	Rapgef2	0.0113275	0.999315	2.16967	2.16967	146.579	67.558
Rps7	ENSMUSG00000061477	Rps7	0.0115541	0.999315	0.642246	-1.55704	1561.6	2431.46
Lrba	ENSMUSG00000028080	Lrba	0.011597	0.999315	2.02671	2.02671	240.006	118.421
Psap	ENSMUSG00000004207	Psap	0.011638	0.999315	1.70685	1.70685	358.76	210.189
Notch2	ENSMUSG00000027878	Notch2	0.0118645	0.999315	2.27619	2.27619	135.058	59.3352
Pfdn5	ENSMUSG00000001289	Pfdn5	0.0120015	0.999315	0.544621	-1.83614	175.581	322.391
Mapkap1	ENSMUSG00000038696	Mapkap1	0.0120077	0.999315	1.81931	1.81931	227.144	124.852
Cdc42se2	ENSMUSG00000052298	Cdc42se2	0.0120682	0.999315	1.63054	1.63054	391.819	240.3
Ubc	ENSMUSG00000008348	Ubc	0.0120866	0.999315	1.6814	1.6814	272.219	161.9
Rhoh	ENSMUSG00000029204	Rhoh	0.0124738	0.999315	0.569369	-1.75633	251.671	442.018
Mef2d	ENSMUSG00000001419	Mef2d	0.0127957	0.999315	2.04494	2.04494	150.6	73.6455
Il10ra	ENSMUSG00000032089	Il10ra	0.0128339	0.999315	2.3811	2.3811	113.452	47.6469
Junb	ENSMUSG00000052837	Junb	0.0135559	0.999315	2.10006	2.10006	197.644	94.1132
Enox2	ENSMUSG00000031109	Enox2	0.0149462	0.999315	2.57248	2.57248	148.721	57.8123
Fau	ENSMUSG00000038274	Fau	0.0149673	0.999315	0.648027	-1.54315	3466.09	5348.68
Dnajc3	ENSMUSG00000022136	Dnajc3	0.0150871	0.999315	1.98403	1.98403	564.582	284.564
Calr	ENSMUSG00000003814	Calr	0.015235	0.999315	1.81416	1.81416	309.62	170.669
Rgs13	ENSMUSG00000051079	Rgs13	0.0157068	0.999315	0.404632	-2.47138	104.661	258.658
Mbd4	ENSMUSG00000030322	Mbd4	0.0162906	0.999315	0.453802	-2.20361	56.3438	124.159
Cdc42se1	ENSMUSG00000046722	Cdc42se1	0.0163012	0.999315	1.92271	1.92271	140.951	73.3083
Gm49980	ENSMUSG00000117465	Gm49980	0.0168558	0.999315	2.08605	2.08605	187.385	89.8276
Cd81	ENSMUSG00000037706	Cd81	0.0169666	0.999315	0.58076	-1.72188	142.815	245.911
N4bp2l2	ENSMUSG00000029655	N4bp2l2	0.0171309	0.999315	1.67351	1.67351	202.099	120.764
Fam107b	ENSMUSG00000026655	Fam107b	0.0173931	0.999315	1.56632	1.56632	473.45	302.27
Slc30a7	ENSMUSG00000054414	Slc30a7	0.0173997	0.999315	2.17549	2.17549	152.953	70.3076
Fth1	ENSMUSG00000024661	Fth1	0.0175383	0.999315	0.627784	-1.59291	1046.23	1666.54
Tmem163	ENSMUSG00000026347	Tmem163	0.0183475	0.999315	2.19099	2.19099	194.377	88.7166
Iglc3	ENSMUSG00000105547	Iglc3	0.0184346	0.999315	0.592926	-1.68655	496.462	837.309
Ifi203	ENSMUSG00000039997	Ifi203	0.0188107	0.999315	2.06135	2.06135	171.009	82.9597
Il31ra	ENSMUSG00000050377	Il31ra	0.0189077	0.999315	0.60114	-1.66351	926.868	1541.85
Hspa5	ENSMUSG00000026864	Hspa5	0.019019	0.999315	1.86432	1.86432	1427.44	765.661
Derl3	ENSMUSG00000009092	Derl3	0.0191373	0.999315	2.36326	2.36326	213.589	90.3788
Ube2g1	ENSMUSG00000020794	Ube2g1	0.0195607	0.999315	0.504068	-1.98386	85.5364	169.692
Scai	ENSMUSG00000035236	Scai	0.0196443	0.999315	0.46885	-2.13288	94.1771	200.868
Yipf3	ENSMUSG00000071074	Yipf3	0.0203919	0.999315	2.17094	2.17094	111.589	51.4011
Azin1	ENSMUSG00000037458	Azin1	0.0204676	0.999315	0.522314	-1.91456	84.8341	162.42
Cd74	ENSMUSG00000024610	Cd74	0.0205668	0.999315	0.742805	-1.34625	9819.77	13219.8
Smc3	ENSMUSG00000024974	Smc3	0.0210986	0.999315	1.81046	1.81046	170.133	93.9725
Akt3	ENSMUSG00000019699	Akt3	0.0211015	0.999315	2.06235	2.06235	178.703	86.6505
Cr1l	ENSMUSG00000016481	Cr1l	0.0215417	0.999315	1.78648	1.78648	147.525	82.5785
Gm19951	ENSMUSG00000113136	Gm19951	0.021673	0.999315	0.614578	-1.62713	419.153	682.017
Polr2a	ENSMUSG00000005198	Polr2a	0.0217796	0.999315	1.82608	1.82608	187.113	102.467
Bank1	ENSMUSG00000037922	Bank1	0.0219835	0.999315	1.82082	1.82082	1565.89	859.992
Rab5a	ENSMUSG00000017831	Rab5a	0.0221448	0.999315	1.81384	1.81384	140.642	77.5387
Mark3	ENSMUSG00000007411	Mark3	0.0222383	0.999315	1.71623	1.71623	193.764	112.901
Arhgap15	ENSMUSG00000049744	Arhgap15	0.0231008	0.999315	1.51813	1.51813	1342.71	884.449
Arap2	ENSMUSG00000037999	Arap2	0.0234998	0.999315	1.95003	1.95003	201.504	103.334
Lrmp	ENSMUSG00000030263	Lrmp	0.0240394	0.999315	0.508964	-1.96478	119.629	235.045
Foxn3	ENSMUSG00000033713	Foxn3	0.0253179	0.999315	1.60297	1.60297	628.199	391.897
Elk4	ENSMUSG00000026436	Elk4	0.0255819	0.999315	1.72996	1.72996	178.281	103.055
Lpin2	ENSMUSG00000024052	Lpin2	0.0256868	0.999315	0.55203	-1.8115	143.142	259.301
Sorl1	ENSMUSG00000049313	Sorl1	0.0259401	0.999315	0.560154	-1.78522	188.274	336.111
Bach2	ENSMUSG00000040270	Bach2	0.0262126	0.999315	0.523555	-1.91002	985.602	1882.52
Rps21	ENSMUSG00000039001	Rps21	0.0262424	0.999315	0.662665	-1.50906	1325.82	2000.75
Rpl28	ENSMUSG00000030432	Rpl28	0.0265116	0.999315	0.632994	-1.57979	1380.47	2180.86
Abce1	ENSMUSG00000058355	Abce1	0.0269602	0.999315	1.88656	1.88656	129.084	68.4231
Clta	ENSMUSG00000028478	Clta	0.0274507	0.999315	0.655298	-1.52602	286.083	436.569
Hip1r	ENSMUSG00000000915	Hip1r	0.0274682	0.999315	1.75139	1.75139	166.35	94.982
Ankrd17	ENSMUSG00000055204	Ankrd17	0.0277416	0.999315	1.55947	1.55947	342.717	219.764
Ankrd13c	ENSMUSG00000039988	Ankrd13c	0.0278696	0.999315	1.9628	1.9628	126.239	64.316
Pik3r1	ENSMUSG00000041417	Pik3r1	0.0279964	0.999315	1.75948	1.75948	161.464	91.7681
Btg2	ENSMUSG00000020423	Btg2	0.0282576	0.999315	1.65355	1.65355	237.802	143.813
Pum1	ENSMUSG00000028580	Pum1	0.0285257	0.999315	0.570889	-1.75165	101.071	177.041
Khdrbs1	ENSMUSG00000028790	Khdrbs1	0.0286044	0.999315	1.54952	1.54952	244.155	157.568
Tgfb1	ENSMUSG00000002603	Tgfb1	0.028938	0.999315	0.559381	-1.78769	110.806	198.087
Grcc10	ENSMUSG00000072772	Grcc10	0.0289494	0.999315	0.590894	-1.69235	166.556	281.872
Rack1	ENSMUSG00000020372	Rack1	0.0290071	0.999315	0.645015	-1.55035	354.497	549.596
Rpl39	ENSMUSG00000079641	Rpl39	0.0290091	0.999315	0.647827	-1.54362	1398.42	2158.63
Ppp2r5c	ENSMUSG00000017843	Ppp2r5c	0.0293373	0.999315	1.7396	1.7396	168.812	97.0409
Rpl13a	ENSMUSG00000074129	Rpl13a	0.0294605	0.999315	0.682554	-1.46509	878.995	1287.8
Rb1	ENSMUSG00000022105	Rb1	0.0295912	0.999315	1.89219	1.89219	212.967	112.55
Rpl30	ENSMUSG00000058600	Rpl30	0.0300057	0.999315	0.666618	-1.50011	1424.55	2136.98
Agtpbp1	ENSMUSG00000021557	Agtpbp1	0.0301153	0.999315	1.93827	1.93827	135.786	70.0552
Slc12a6	ENSMUSG00000027130	Slc12a6	0.030206	0.999315	1.54688	1.54688	470.815	304.364
Kpna3	ENSMUSG00000021929	Kpna3	0.0304221	0.999315	0.49513	-2.01967	53.7308	108.519
2610035D17Rik	ENSMUSG00000087259	2610035D17Rik	0.0304263	0.999315	0.541427	-1.84697	252.162	465.736
Rpl35a	ENSMUSG00000060636	Rpl35a	0.0304767	0.999315	0.663718	-1.50666	1594.94	2403.04
Arid3a	ENSMUSG00000019564	Arid3a	0.0308052	0.999315	1.97333	1.97333	137.144	69.4987
Scaper	ENSMUSG00000034007	Scaper	0.031586	0.999315	2.04804	2.04804	118.235	57.7311
Rpl35	ENSMUSG00000062997	Rpl35	0.031694	0.999315	0.631996	-1.58229	981.648	1553.25
Fli1	ENSMUSG00000016087	Fli1	0.0317996	0.999315	1.49224	1.49224	510.806	342.308
Ripor2	ENSMUSG00000036006	Ripor2	0.0325606	0.999315	1.66566	1.66566	732.154	439.557
Gpr183	ENSMUSG00000051212	Gpr183	0.0326657	0.999315	2.07367	2.07367	126.678	61.0888
Rps16	ENSMUSG00000037563	Rps16	0.0326802	0.999315	0.666383	-1.50064	1862.81	2795.4
Taf1d	ENSMUSG00000031939	Taf1d	0.0328629	0.999315	0.546086	-1.83121	84.24	154.261
Psip1	ENSMUSG00000028484	Psip1	0.0330409	0.999315	0.64552	-1.54914	227.059	351.745
Txndc16	ENSMUSG00000021830	Txndc16	0.0332063	0.999315	0.530835	-1.88383	98.5894	185.725
Ciita	ENSMUSG00000022504	Ciita	0.0334006	0.999315	0.537182	-1.86157	97.9257	182.295
Irak2	ENSMUSG00000060477	Irak2	0.03365	0.999315	1.85062	1.85062	108.568	58.6655
Rps27	ENSMUSG00000090733	Rps27	0.033818	0.999315	0.693389	-1.44219	1152.61	1662.28
Ighg1	ENSMUSG00000076614	Ighg1	0.0343984	0.999315	0.312545	-3.19954	42.5523	136.148
Bub3	ENSMUSG00000066979	Bub3	0.0346592	0.999315	0.531055	-1.88304	58.8679	110.851
Rpl22l1	ENSMUSG00000039221	Rpl22l1	0.0347205	0.999315	0.59441	-1.68234	186.792	314.248
Bclaf1	ENSMUSG00000037608	Bclaf1	0.0351637	0.999315	1.59231	1.59231	229.174	143.926
Rps24	ENSMUSG00000025290	Rps24	0.0352164	0.999315	0.701438	-1.42564	2783.06	3967.66
Rpl12	ENSMUSG00000038900	Rpl12	0.0352178	0.999315	0.652204	-1.53326	380.897	584.014
Taldo1	ENSMUSG00000025503	Taldo1	0.0352613	0.999315	0.580194	-1.72356	115.764	199.526
Fry	ENSMUSG00000056602	Fry	0.0355605	0.999315	2.13069	2.13069	153.24	71.9204
Anxa6	ENSMUSG00000018340	Anxa6	0.0356299	0.999315	2.01972	2.01972	113.76	56.3248
Myo5a	ENSMUSG00000034593	Myo5a	0.0359737	0.999315	1.64102	1.64102	308.263	187.849
Ube2l3	ENSMUSG00000038965	Ube2l3	0.0361137	0.999315	0.574034	-1.74206	80.6312	140.464
Man1b1	ENSMUSG00000036646	Man1b1	0.0363607	0.999315	2.13168	2.13168	132.771	62.2848
Eef1d	ENSMUSG00000055762	Eef1d	0.0366069	0.999315	0.603418	-1.65723	148.285	245.742
Nup98	ENSMUSG00000063550	Nup98	0.0368175	0.999315	1.86302	1.86302	130.163	69.8666
Ehmt2	ENSMUSG00000013787	Ehmt2	0.0371054	0.999315	1.80539	1.80539	111.732	61.8877
Ctsb	ENSMUSG00000021939	Ctsb	0.0372022	0.999315	1.85646	1.85646	137.085	73.8424
P4hb	ENSMUSG00000025130	P4hb	0.0372829	0.999315	1.66763	1.66763	258.007	154.715
Fcmr	ENSMUSG00000042474	Fcmr	0.0382916	0.999315	0.614992	-1.62604	190.043	309.017
C2cd5	ENSMUSG00000030279	C2cd5	0.0384426	0.999315	1.79499	1.79499	131.843	73.4507
Kpna4	ENSMUSG00000027782	Kpna4	0.0384601	0.999315	1.6259	1.6259	269.468	165.734
Gm11808	ENSMUSG00000068240	Gm11808	0.0386682	0.999315	0.59442	-1.68231	193.448	325.44
Dtnbp1	ENSMUSG00000057531	Dtnbp1	0.0389748	0.999315	0.552713	-1.80926	78.1689	141.428
Usp25	ENSMUSG00000022867	Usp25	0.0396155	0.999315	1.80148	1.80148	147.655	81.9632
Arf4	ENSMUSG00000021877	Arf4	0.0396758	0.999315	1.62843	1.62843	229.53	140.952
Ppp1r12a	ENSMUSG00000019907	Ppp1r12a	0.0397292	0.999315	1.49678	1.49678	380.049	253.912
Igkv1-122	ENSMUSG00000095497	Igkv1-122	0.0397497	0.999315	2.5181	2.5181	161.555	64.1577
Nuggc	ENSMUSG00000061356	Nuggc	0.0397942	0.999315	0.534265	-1.87173	71.474	133.78
Eif5	ENSMUSG00000021282	Eif5	0.0398177	0.999315	0.615089	-1.62578	127.4	207.125
Nrd1	ENSMUSG00000053510	Nrd1	0.0399403	0.999315	1.54994	1.54994	270.416	174.469
Pou2f2	ENSMUSG00000008496	Pou2f2	0.0402597	0.999315	0.656187	-1.52396	232.397	354.163
Gbf1	ENSMUSG00000025224	Gbf1	0.0405539	0.999315	1.67455	1.67455	264.289	157.827
Hdlbp	ENSMUSG00000034088	Hdlbp	0.0406778	0.999315	1.68226	1.68226	347.396	206.505
Tbc1d5	ENSMUSG00000023923	Tbc1d5	0.0410934	0.999315	1.77713	1.77713	276.728	155.716
Tox	ENSMUSG00000041272	Tox	0.0412393	0.999315	0.397832	-2.51362	112.594	283.02
Lats1	ENSMUSG00000040021	Lats1	0.0414854	0.999315	1.92391	1.92391	106.767	55.495
Tnfaip8	ENSMUSG00000062210	Tnfaip8	0.0420257	0.999315	0.656075	-1.52422	351.355	535.542
Rps28	ENSMUSG00000067288	Rps28	0.0420387	0.999315	0.675769	-1.4798	1257.16	1860.33
Rpl27a	ENSMUSG00000046364	Rpl27a	0.0421348	0.999315	0.688743	-1.45192	1041.62	1512.35
Cebpz	ENSMUSG00000024081	Cebpz	0.0423081	0.999315	1.70716	1.70716	148.575	87.0306
Ccdc50	ENSMUSG00000038127	Ccdc50	0.0425094	0.999315	0.621272	-1.6096	202.2	325.461
Scaf11	ENSMUSG00000033228	Scaf11	0.0426906	0.999315	0.659836	-1.51553	291.332	441.523
Stk10	ENSMUSG00000020272	Stk10	0.0428173	0.999315	1.84654	1.84654	137.221	74.3124
Phf21a	ENSMUSG00000058318	Phf21a	0.0429179	0.999315	1.72426	1.72426	249.894	144.929
Crip1	ENSMUSG00000006360	Crip1	0.0430066	0.999315	0.59876	-1.67012	584.145	975.592
Ier5	ENSMUSG00000056708	Ier5	0.0432455	0.999315	1.78875	1.78875	138.363	77.3519
Ltb	ENSMUSG00000024399	Ltb	0.0432909	0.999315	0.625657	-1.59832	289.738	463.093
Usp9x	ENSMUSG00000031010	Usp9x	0.0434584	0.999315	1.72903	1.72903	205.356	118.769
Mllt3	ENSMUSG00000028496	Mllt3	0.0439628	0.999315	1.97433	1.97433	186.734	94.5813
Gm30211	ENSMUSG00000105646	Gm30211	0.0441795	0.999315	1.58753	1.58753	1240.47	781.384
Rps27l	ENSMUSG00000036781	Rps27l	0.0447368	0.999315	1.69868	1.69868	190.871	112.364
Aim2	ENSMUSG00000037860	Aim2	0.0447482	0.999315	1.71479	1.71479	135.943	79.2766
Pced1b	ENSMUSG00000044250	Pced1b	0.0451016	0.999315	0.565415	-1.76861	108.742	192.323
Rilpl2	ENSMUSG00000029401	Rilpl2	0.045156	0.999315	1.91097	1.91097	121.391	63.5231
Ppdpf	ENSMUSG00000016344	Ppdpf	0.0454512	0.999315	0.570376	-1.75323	93.2388	163.469
Cotl1	ENSMUSG00000031827	Cotl1	0.0454634	0.999315	0.534759	-1.87	84.0812	157.232
Jun	ENSMUSG00000052684	Jun	0.0454637	0.999315	2.41492	2.41492	139.838	57.9057
Man1a	ENSMUSG00000003746	Man1a	0.0457082	0.999315	1.54006	1.54006	1045.99	679.188
Aicda	ENSMUSG00000040627	Aicda	0.0458789	0.999315	0.501331	-1.99469	138.251	275.769
Kpna1	ENSMUSG00000022905	Kpna1	0.0461454	0.999315	1.73033	1.73033	132.075	76.3293
Nisch	ENSMUSG00000021910	Nisch	0.0462022	0.999315	1.72829	1.72829	135.829	78.5915
Rpl19	ENSMUSG00000017404	Rpl19	0.046419	0.999315	0.706271	-1.41589	1689.44	2392.05
Sipa1l1	ENSMUSG00000042700	Sipa1l1	0.0465562	0.999315	1.76677	1.76677	166.324	94.1403
Rpl9	ENSMUSG00000047215	Rpl9	0.0474462	0.999315	0.70542	-1.4176	1580.83	2240.98
Cd180	ENSMUSG00000021624	Cd180	0.0475218	0.999315	0.584648	-1.71043	156.683	267.995
Camk1d	ENSMUSG00000039145	Camk1d	0.0478228	0.999315	0.644771	-1.55094	926.747	1437.33
Airn	ENSMUSG00000078247	Airn	0.0480736	0.999315	2.75125	2.75125	177.039	64.3486
Suco	ENSMUSG00000040297	Suco	0.0482101	0.999315	1.62256	1.62256	238.496	146.987
Csnk1d	ENSMUSG00000025162	Csnk1d	0.0484469	0.999315	1.76788	1.76788	92.575	52.365
Ccdc12	ENSMUSG00000019659	Ccdc12	0.048603	0.999315	0.578296	-1.72922	80.1702	138.632
Fosb	ENSMUSG00000003545	Fosb	0.0492972	0.999315	2.86921	2.86921	117.555	40.9714
Nbas	ENSMUSG00000020576	Nbas	0.049701	0.999315	1.96094	1.96094	221.335	112.872
Stk38	ENSMUSG00000024006	Stk38	0.0497046	0.999315	1.77733	1.77733	165.382	93.0505
Ube2m	ENSMUSG00000005575	Ube2m	0.0497362	0.999315	0.575946	-1.73627	70.7262	122.8

## Sheet: Spleen_GC_New MI vs sham
Gene ID	Ensembl ID	Gene name	P-value	FDR step up	Ratio	Fold change	LSMean(recentMI)	LSMean(sham)		Genes differentially expressed in antigen processing and presentation
Sptbn1	ENSMUSG00000020315	Sptbn1	0.0284019	0.999629	1.72216	1.72216	149.323	86.7067		Gene Symbol	Gene Description
Cdk8	ENSMUSG00000029635	Cdk8	0.0180091	0.999629	0.663104	-1.50806	4463.74	6731.57		PSME2	proteasome activator subunit 2
Laptm5	ENSMUSG00000028581	Laptm5	0.000355594	0.353905	0.525716	-1.90217	324.662	617.562		HLA-DRB5	major histocompatibility complex, class II, DR beta 5
Mybl1	ENSMUSG00000025912	Mybl1	0.0410873	0.999629	0.550787	-1.81558	180.134	327.049		HLA-DMA	major histocompatibility complex, class II, DM alpha
Apoe	ENSMUSG00000002985	Apoe	0.000733271	0.531078	0.337327	-2.96449	148.673	440.738		HLA-DQA1	major histocompatibility complex, class II, DQ alpha 1
Cmah	ENSMUSG00000016756	Cmah	0.0210378	0.999629	1.84901	1.84901	292.716	158.309		HLA-DQB1	major histocompatibility complex, class II, DQ beta 1
Tmcc3	ENSMUSG00000020023	Tmcc3	0.00571878	0.999629	2.73807	2.73807	164.374	60.033		HLA-B	major histocompatibility complex, class I, B
Cerk	ENSMUSG00000035891	Cerk	0.0325878	0.999629	0.618056	-1.61798	188.211	304.521		TAP2	transporter 2, ATP binding cassette subfamily B member
Ankrd44	ENSMUSG00000052331	Ankrd44	0.00554377	0.999629	1.66797	1.66797	533.19	319.665		IFI30	IFI30 lysosomal thiol reductase
Rps20	ENSMUSG00000028234	Rps20	0.0140842	0.999629	0.6453	-1.54967	2994.56	4640.57		CD74	CD74 molecule
Maml2	ENSMUSG00000031925	Maml2	0.000133507	0.32646	3.10358	3.10358	497.507	160.301
Nedd9	ENSMUSG00000021365	Nedd9	0.000249611	0.32646	1.95418	1.95418	761.306	389.579
Aff1	ENSMUSG00000029313	Aff1	0.0292341	0.999629	1.90038	1.90038	189.179	99.5478
Cd79a	ENSMUSG00000003379	Cd79a	0.000173805	0.32646	0.5683	-1.75963	1072.98	1888.05
Tnrc6b	ENSMUSG00000047888	Tnrc6b	0.00737382	0.999629	1.69804	1.69804	482.368	284.074
H2-Aa	ENSMUSG00000036594	H2-Aa	0.00202828	0.720791	0.617143	-1.62037	1364.33	2210.72
Rev1	ENSMUSG00000026082	Rev1	0.0200576	0.999629	0.549065	-1.82128	113.911	207.463
Arpc5l	ENSMUSG00000026755	Arpc5l	0.0003005	0.32646	0.486919	-2.05373	218.145	448.01
Aff3	ENSMUSG00000037138	Aff3	0.00903551	0.999629	2.07447	2.07447	786.753	379.254
Rps11	ENSMUSG00000003429	Rps11	0.00312109	0.892785	0.575951	-1.73626	1164.12	2021.22
H2-DMa	ENSMUSG00000037649	H2-DMa	0.00263635	0.818316	0.50047	-1.99812	134.571	268.89
Rapgef2	ENSMUSG00000062232	Rapgef2	0.0203762	0.999629	1.96234	1.96234	132.572	67.558
Rps7	ENSMUSG00000061477	Rps7	0.0403242	0.999629	0.714185	-1.4002	1736.51	2431.46
Lrba	ENSMUSG00000028080	Lrba	0.00214727	0.720791	2.21846	2.21846	262.712	118.421
Notch2	ENSMUSG00000027878	Notch2	0.0206561	0.999629	2.05415	2.05415	121.883	59.3352
Pfdn5	ENSMUSG00000001289	Pfdn5	0.0065981	0.999629	0.545759	-1.83231	175.948	322.391
Cdc42se2	ENSMUSG00000052298	Cdc42se2	0.0247397	0.999629	1.51008	1.51008	362.873	240.3
Mef2d	ENSMUSG00000001419	Mef2d	0.0319316	0.999629	1.8003	1.8003	132.584	73.6455
Fau	ENSMUSG00000038274	Fau	0.00094337	0.547979	0.571942	-1.74843	3059.14	5348.68
N4bp2l2	ENSMUSG00000029655	N4bp2l2	0.0127343	0.999629	1.65057	1.65057	199.329	120.764
Slc30a7	ENSMUSG00000054414	Slc30a7	0.0101625	0.999629	2.19902	2.19902	154.608	70.3076
Fth1	ENSMUSG00000024661	Fth1	0.00184769	0.713909	0.561774	-1.78008	936.219	1666.54
Iglc3	ENSMUSG00000105547	Iglc3	0.000150103	0.32646	0.446507	-2.23961	373.864	837.309
Cd74	ENSMUSG00000024610	Cd74	0.000590943	0.481496	0.658249	-1.51918	8701.95	13219.8
Akt3	ENSMUSG00000019699	Akt3	0.0437731	0.999629	1.82405	1.82405	158.055	86.6505
Bank1	ENSMUSG00000037922	Bank1	0.00697395	0.999629	1.9483	1.9483	1675.52	859.992
Arhgap15	ENSMUSG00000049744	Arhgap15	0.000236743	0.32646	1.87884	1.87884	1661.74	884.449
Foxn3	ENSMUSG00000033713	Foxn3	0.000454617	0.423335	1.98258	1.98258	776.967	391.897
Rps21	ENSMUSG00000039001	Rps21	0.0223459	0.999629	0.672078	-1.48792	1344.66	2000.75
Rpl28	ENSMUSG00000030432	Rpl28	0.0289537	0.999629	0.65472	-1.52737	1427.85	2180.86
Clta	ENSMUSG00000028478	Clta	5.99464e-05	0.293063	0.468772	-2.13323	204.651	436.569
Grcc10	ENSMUSG00000072772	Grcc10	0.00426963	0.999629	0.522099	-1.91535	147.165	281.872
Rpl39	ENSMUSG00000079641	Rpl39	0.0217147	0.999629	0.65072	-1.53676	1404.66	2158.63
Ppp2r5c	ENSMUSG00000017843	Ppp2r5c	0.0424187	0.999629	1.6263	1.6263	157.817	97.0409
Rpl13a	ENSMUSG00000074129	Rpl13a	0.0172645	0.999629	0.676497	-1.4782	871.195	1287.8
Rpl30	ENSMUSG00000058600	Rpl30	0.00572385	0.999629	0.614064	-1.6285	1312.24	2136.98
Slc12a6	ENSMUSG00000027130	Slc12a6	0.0162705	0.999629	1.57041	1.57041	477.975	304.364
2610035D17Rik	ENSMUSG00000087259	2610035D17Rik	0.0323129	0.999629	0.570213	-1.75373	265.569	465.736
Rpl35a	ENSMUSG00000060636	Rpl35a	0.00752144	0.999629	0.61993	-1.61309	1489.72	2403.04
Scaper	ENSMUSG00000034007	Scaper	0.0317287	0.999629	1.96998	1.96998	113.729	57.7311
Rpl35	ENSMUSG00000062997	Rpl35	0.0254961	0.999629	0.638712	-1.56565	992.079	1553.25
Ripor2	ENSMUSG00000036006	Ripor2	0.0377131	0.999629	1.59704	1.59704	701.989	439.557
Psip1	ENSMUSG00000028484	Psip1	0.00317557	0.892785	0.564557	-1.7713	198.58	351.745
Irak2	ENSMUSG00000060477	Irak2	0.00261304	0.818316	2.22339	2.22339	130.436	58.6655
Rps27	ENSMUSG00000090733	Rps27	0.0042834	0.999629	0.628065	-1.59219	1044.02	1662.28
Rpl22l1	ENSMUSG00000039221	Rpl22l1	0.0406385	0.999629	0.630435	-1.58621	198.113	314.248
Rpl12	ENSMUSG00000038900	Rpl12	0.0116088	0.999629	0.619995	-1.61292	362.086	584.014
Taldo1	ENSMUSG00000025503	Taldo1	0.00681868	0.999629	0.513749	-1.94648	102.506	199.526
Fry	ENSMUSG00000056602	Fry	0.0108921	0.999629	2.35066	2.35066	169.061	71.9204
Myo5a	ENSMUSG00000034593	Myo5a	0.027475	0.999629	1.62703	1.62703	305.635	187.849
Nup98	ENSMUSG00000063550	Nup98	0.0187604	0.999629	1.92569	1.92569	134.541	69.8666
C2cd5	ENSMUSG00000030279	C2cd5	0.0215792	0.999629	1.83554	1.83554	134.822	73.4507
Gm11808	ENSMUSG00000068240	Gm11808	0.0159913	0.999629	0.568883	-1.75783	185.137	325.44
Tbc1d5	ENSMUSG00000023923	Tbc1d5	0.00026371	0.32646	2.547	2.547	396.609	155.716
Rpl27a	ENSMUSG00000046364	Rpl27a	0.0124758	0.999629	0.649502	-1.53964	982.277	1512.35
Stk10	ENSMUSG00000020272	Stk10	0.0211255	0.999629	1.91991	1.91991	142.673	74.3124
Crip1	ENSMUSG00000006360	Crip1	0.0106976	0.999629	0.543059	-1.84142	529.805	975.592
Ltb	ENSMUSG00000024399	Ltb	3.24989e-05	0.293063	0.382656	-2.61331	177.206	463.093
Mllt3	ENSMUSG00000028496	Mllt3	0.0101629	0.999629	2.23975	2.23975	211.838	94.5813
Pced1b	ENSMUSG00000044250	Pced1b	0.0490512	0.999629	0.594808	-1.68121	114.395	192.323
Jun	ENSMUSG00000052684	Jun	0.00431226	0.999629	3.21811	3.21811	186.347	57.9057
Man1a	ENSMUSG00000003746	Man1a	0.0101418	0.999629	1.68492	1.68492	1144.38	679.188
Aicda	ENSMUSG00000040627	Aicda	0.0422371	0.999629	0.519383	-1.92536	143.229	275.769
Rpl19	ENSMUSG00000017404	Rpl19	0.00575164	0.999629	0.633797	-1.57779	1516.08	2392.05
Csnk1d	ENSMUSG00000025162	Csnk1d	0.0144212	0.999629	1.92926	1.92926	101.026	52.365
Ccdc12	ENSMUSG00000019659	Ccdc12	0.00874572	0.999629	0.499161	-2.00336	69.1996	138.632
Nbas	ENSMUSG00000020576	Nbas	0.0166078	0.999629	2.1528	2.1528	242.991	112.872
Mapk1	ENSMUSG00000063358	Mapk1	0.0296351	0.999629	1.58175	1.58175	225.378	142.487
Cd37	ENSMUSG00000030798	Cd37	0.0163569	0.999629	0.694612	-1.43965	699.911	1007.63
Ppp1ca	ENSMUSG00000040385	Ppp1ca	0.00431745	0.999629	0.538534	-1.85689	202.362	375.765
Serf2	ENSMUSG00000074884	Serf2	0.00145154	0.674691	0.559221	-1.7882	540.406	966.355
Macf1	ENSMUSG00000028649	Macf1	0.0196887	0.999629	1.4541	1.4541	702.745	483.285
Fam172a	ENSMUSG00000064138	Fam172a	0.0323565	0.999629	1.73046	1.73046	275.161	159.011
Arhgef18	ENSMUSG00000004568	Arhgef18	0.00450199	0.999629	2.62275	2.62275	163.047	62.1665
Pias1	ENSMUSG00000032405	Pias1	0.0153328	0.999629	1.7833	1.7833	190.614	106.888
Fbxl17	ENSMUSG00000023965	Fbxl17	0.0271161	0.999629	1.6558	1.6558	325.995	196.881
Col4a3bp	ENSMUSG00000021669	.	0.0384848	0.999629	1.77374	1.77374	126.669	71.4136
Rpl10	ENSMUSG00000008682	Rpl10	0.0318078	0.999629	0.691605	-1.44591	738.365	1067.61
H3f3a	ENSMUSG00000060743	H3f3a	0.028754	0.999629	0.677527	-1.47596	766.365	1131.12
Prr13	ENSMUSG00000023048	Prr13	0.0147439	0.999629	0.539601	-1.85322	80.5883	149.348
Ifi30	ENSMUSG00000031838	Ifi30	0.0494459	0.999629	0.587184	-1.70305	209.432	356.672
Rps29	ENSMUSG00000034892	Rps29	0.00561014	0.999629	0.620116	-1.6126	1141.67	1841.06
Mif4gd	ENSMUSG00000020743	Mif4gd	0.0101014	0.999629	0.518143	-1.92997	117.246	226.282
H2-Eb1	ENSMUSG00000060586	H2-Eb1	0.00704728	0.999629	0.667667	-1.49775	1196.03	1791.36
Arhgap24	ENSMUSG00000057315	Arhgap24	0.0244479	0.999629	2.07624	2.07624	322.884	155.514
Arpp19	ENSMUSG00000007656	Arpp19	0.0153048	0.999629	0.604883	-1.65321	145.652	240.793
Rpl18a	ENSMUSG00000045128	Rpl18a	0.022185	0.999629	0.678268	-1.47434	1982.1	2922.3
Aldoa	ENSMUSG00000030695,ENSMUSG00000114515	Aldoa	0.00105498	0.589431	0.457642	-2.18511	74.2485	162.241
Pik3cg	ENSMUSG00000020573	Pik3cg	0.00792534	0.999629	2.32582	2.32582	165.483	71.1503
Actb	ENSMUSG00000029580	Actb	0.00319585	0.892785	0.616526	-1.62199	3748.6	6080.2
Pfn1	ENSMUSG00000018293	Pfn1	0.0101106	0.999629	0.59342	-1.68515	1003.68	1691.35
Pkn2	ENSMUSG00000004591	Pkn2	0.0155845	0.999629	1.61524	1.61524	210.647	130.412
Polr1d	ENSMUSG00000029642	Polr1d	0.00128965	0.664559	0.490786	-2.03755	142.012	289.355
2410006H16Rik	ENSMUSG00000086841	2410006H16Rik	0.00383276	0.999629	0.55024	-1.81739	197.273	358.521
Rpl37	ENSMUSG00000041841	Rpl37	0.0293412	0.999629	0.685925	-1.45788	2099.19	3060.38
Cd79b	ENSMUSG00000040592	Cd79b	0.0207767	0.999629	0.691696	-1.44572	772.502	1116.82
Eif3k	ENSMUSG00000053565	Eif3k	0.00453613	0.999629	0.569925	-1.75462	181.944	319.242
Tmsb10	ENSMUSG00000079523	Tmsb10	0.0116633	0.999629	0.594852	-1.68109	2583.64	4343.33
Prpf39	ENSMUSG00000035597	Prpf39	0.00820831	0.999629	1.97891	1.97891	130.291	65.8396
Sh3bgrl3	ENSMUSG00000028843	Sh3bgrl3	0.000881389	0.547979	0.490707	-2.03788	448.689	914.373
Rpl23	ENSMUSG00000071415	Rpl23	0.0325519	0.999629	0.702846	-1.42279	1620.57	2305.73
Blnk	ENSMUSG00000061132	Blnk	0.00514556	0.999629	1.47882	1.47882	780.546	527.818
Crlf3	ENSMUSG00000017561	Crlf3	0.00199394	0.720791	1.88395	1.88395	283.885	150.686
Crebbp	ENSMUSG00000022521	Crebbp	0.0187747	0.999629	1.62268	1.62268	241.154	148.615
Pgap1	ENSMUSG00000073678	Pgap1	0.0409534	0.999629	1.87133	1.87133	117.228	62.6441
Coro1a	ENSMUSG00000030707	Coro1a	0.00746919	0.999629	0.63049	-1.58607	625.916	992.746
Cop1	ENSMUSG00000040782	Cop1	0.0243855	0.999629	1.66712	1.66712	187.853	112.681
Rpl8	ENSMUSG00000003970	Rpl8	0.0480672	0.999629	0.725612	-1.37815	1293.41	1782.51
Ubr3	ENSMUSG00000044308	Ubr3	0.0320147	0.999629	1.82972	1.82972	141.894	77.5495
Arpc2	ENSMUSG00000006304	Arpc2	0.012821	0.999629	0.682724	-1.46472	385.252	564.287
Rpl34	ENSMUSG00000062006	Rpl34	0.0153638	0.999629	0.64465	-1.55123	1328.51	2060.83
Med13	ENSMUSG00000034297	Med13	0.00514896	0.999629	1.83116	1.83116	372.566	203.459
Irf8	ENSMUSG00000041515	Irf8	0.00659122	0.999629	0.556617	-1.79657	166.464	299.064
Nrros	ENSMUSG00000052384	Nrros	0.00360471	0.979028	2.15199	2.15199	222.024	103.171
Ndufb1-ps	ENSMUSG00000113902	.	0.00486324	0.999629	0.502494	-1.99007	225.934	449.625
Rps15a	ENSMUSG00000008683	Rps15a	0.0459378	0.999629	0.685731	-1.4583	1412.11	2059.28
Eif1	ENSMUSG00000035530	Eif1	0.0172281	0.999629	0.709814	-1.40882	765.145	1077.95
H2-Ab1	ENSMUSG00000073421	H2-Ab1	0.00599575	0.999629	0.646862	-1.54592	787.66	1217.66
N4bp1	ENSMUSG00000031652	N4bp1	0.0195304	0.999629	1.98886	1.98886	126.16	63.4334
Atxn1	ENSMUSG00000046876	Atxn1	0.0140341	0.999629	2.4901	2.4901	677.126	271.927
Rps26	ENSMUSG00000025362	Rps26	0.043942	0.999629	0.688406	-1.45263	1753.87	2547.72
Pecam1	ENSMUSG00000020717	Pecam1	0.0265442	0.999629	1.85998	1.85998	193.891	104.244
Mapkapk2	ENSMUSG00000016528	Mapkapk2	0.000244786	0.32646	2.468	2.468	150.398	60.9395
Cobll1	ENSMUSG00000034903	Cobll1	0.0444668	0.999629	2.06262	2.06262	100.149	48.5544
Phkb	ENSMUSG00000036879	Phkb	0.0205231	0.999629	1.86325	1.86325	159.296	85.4937
Cox7a2l	ENSMUSG00000024248	Cox7a2l	5.13712e-05	0.293063	0.336311	-2.97344	59.1078	175.753
Taok3	ENSMUSG00000061288	Taok3	0.0216441	0.999629	1.57197	1.57197	246.305	156.685
Atf6	ENSMUSG00000026663	Atf6	0.0492051	0.999629	1.71954	1.71954	580.2	337.416
Preb	ENSMUSG00000045302	Preb	0.030155	0.999629	0.514543	-1.94347	73.1801	142.224
Rps23	ENSMUSG00000049517	Rps23	0.0499544	0.999629	0.701585	-1.42534	745.201	1062.17
Rps6	ENSMUSG00000028495	Rps6	0.0257207	0.999629	0.651987	-1.53377	365.583	560.721
Malt1	ENSMUSG00000032688	Malt1	0.00833916	0.999629	1.74492	1.74492	351.206	201.274
Nfkb1	ENSMUSG00000028163	Nfkb1	0.0122643	0.999629	1.7398	1.7398	258.181	148.397
Foxp1	ENSMUSG00000030067	Foxp1	0.00185064	0.713909	1.70607	1.70607	1326.64	777.599
Fndc3b	ENSMUSG00000039286	Fndc3b	0.000828271	0.547979	4.37116	4.37116	411.777	94.2031
Numa1	ENSMUSG00000066306	Numa1	0.0264588	0.999629	1.73458	1.73458	133.769	77.119
Myl12a	ENSMUSG00000024048	Myl12a	0.0175114	0.999629	0.552041	-1.81146	117.742	213.285
Cd72	ENSMUSG00000028459	Cd72	0.00599557	0.999629	0.438985	-2.27798	93.9324	213.976
Ptpn22	ENSMUSG00000027843	Ptpn22	7.64033e-05	0.298813	3.09582	3.09582	261.557	84.4873
Myl6	ENSMUSG00000090841	Myl6	0.00197573	0.720791	0.518117	-1.93007	342.183	660.435
Fcrl5	ENSMUSG00000048031	Fcrl5	0.0231803	0.999629	2.24623	2.24623	127.026	56.5507
Smim14	ENSMUSG00000037822	Smim14	0.0116064	0.999629	0.602603	-1.65947	198.95	330.151
Sumo2	ENSMUSG00000020738	Sumo2	0.0274324	0.999629	0.618406	-1.61706	247.569	400.334
Rbbp7	ENSMUSG00000031353	Rbbp7	0.0363609	0.999629	0.590143	-1.6945	108.399	183.682
Purb	ENSMUSG00000094483	Purb	0.0250593	0.999629	0.678781	-1.47323	223.173	328.784
Mcm6	ENSMUSG00000026355	Mcm6	0.04656	0.999629	0.564115	-1.77269	83.0466	147.216
Rpl11	ENSMUSG00000059291	Rpl11	0.042647	0.999629	0.709496	-1.40945	1287.27	1814.35
Zfp36l2	ENSMUSG00000045817	Zfp36l2	0.0225089	0.999629	1.88811	1.88811	200.958	106.434
Stk24	ENSMUSG00000063410	Stk24	0.000949308	0.547979	2.04183	2.04183	256.161	125.456
Prkce	ENSMUSG00000045038	Prkce	0.0167768	0.999629	1.86688	1.86688	357.406	191.445
Ptprj	ENSMUSG00000025314	Ptprj	0.0140083	0.999629	2.03668	2.03668	337.087	165.508
Spib	ENSMUSG00000008193	Spib	0.025352	0.999629	0.535671	-1.86682	97.2698	181.585
Eef1b2	ENSMUSG00000025967	Eef1b2	0.0344387	0.999629	0.674938	-1.48162	418.962	620.741
Snrpg	ENSMUSG00000057278	Snrpg	0.0161668	0.999629	0.56498	-1.76997	236.341	418.318
Rps6ka3	ENSMUSG00000031309	Rps6ka3	0.0223347	0.999629	1.78765	1.78765	206.413	115.466
Bbs9	ENSMUSG00000035919	Bbs9	0.00171672	0.713909	2.93504	2.93504	178.854	60.9376
Uqcrh	ENSMUSG00000063882	Uqcrh	0.0151882	0.999629	0.603678	-1.65651	314.012	520.164
Slc25a19	ENSMUSG00000020744	Slc25a19	0.0129785	0.999629	0.453424	-2.20544	46.368	102.262
Abi3	ENSMUSG00000018381	Abi3	0.0322516	0.999629	0.547748	-1.82566	66.8003	121.955
Specc1l	ENSMUSG00000033444	Specc1l	0.0371931	0.999629	1.77621	1.77621	128.026	72.0781
Tex14	ENSMUSG00000010342	Tex14	0.0452199	0.999629	2.19736	2.19736	142.007	64.6263
Dnaja2	ENSMUSG00000031701	Dnaja2	0.026777	0.999629	0.600139	-1.66628	115.415	192.314
Atf7	ENSMUSG00000099083	Atf7	0.0249792	0.999629	1.68131	1.68131	167.775	99.7882
Arid5b	ENSMUSG00000019947	Arid5b	0.0191057	0.999629	1.87621	1.87621	295.02	157.242
Arf5	ENSMUSG00000020440	Arf5	0.0189344	0.999629	0.548845	-1.82201	100.378	182.889
St3gal1	ENSMUSG00000013846	St3gal1	0.0472055	0.999629	1.73577	1.73577	139.965	80.6356
Nsmce2	ENSMUSG00000059586	Nsmce2	0.0018984	0.713909	1.94111	1.94111	234.976	121.052
Rpl22	ENSMUSG00000028936	Rpl22	0.0160725	0.999629	0.650165	-1.53807	973.466	1497.26
Gimap6	ENSMUSG00000047867	Gimap6	0.0319739	0.999629	1.52275	1.52275	234.291	153.86
Psenen	ENSMUSG00000036835	Psenen	0.0440514	0.999629	0.588585	-1.69899	98.1641	166.78
Txnip	ENSMUSG00000038393	Txnip	0.00151667	0.674691	2.21969	2.21969	277.803	125.154
Bcl2	ENSMUSG00000057329	Bcl2	0.00118434	0.643325	2.91016	2.91016	384.76	132.212
Cyba	ENSMUSG00000006519	Cyba	0.042086	0.999629	0.674522	-1.48253	301.048	446.314
Pomp	ENSMUSG00000029649	Pomp	0.00217472	0.720791	0.433331	-2.30771	87.8337	202.694
Iglc2	ENSMUSG00000076937	Iglc2	0.00976117	0.999629	1.69373	1.69373	964.845	569.655
H2-D1	ENSMUSG00000073411	H2-D1	0.0214743	0.999629	0.744437	-1.3433	920.824	1236.94
Cox20	ENSMUSG00000026500	Cox20	0.0359012	0.999629	0.502615	-1.98959	50.2298	99.9369
Arpc4	ENSMUSG00000079426	Arpc4	0.0015181	0.674691	0.490604	-2.03831	114.261	232.9
Hipk1	ENSMUSG00000008730	Hipk1	0.00759414	0.999629	1.71759	1.71759	330.999	192.711
Mrps21	ENSMUSG00000054312	Mrps21	0.00800951	0.999629	0.505242	-1.97925	106.623	211.033
Camkmt	ENSMUSG00000071037	Camkmt	0.0275986	0.999629	2.30843	2.30843	159.635	69.1532
Cd83	ENSMUSG00000015396	Cd83	0.0118527	0.999629	0.47499	-2.10531	111.89	235.562
Rpl7	ENSMUSG00000043716	Rpl7	0.0409365	0.999629	0.683071	-1.46398	580.239	849.456
Rpl36	ENSMUSG00000057863	Rpl36	0.0434749	0.999629	0.702197	-1.4241	1191.73	1697.14
Ext1	ENSMUSG00000061731	Ext1	0.0393686	0.999629	2.10783	2.10783	121.651	57.7138
Zfp407	ENSMUSG00000048410	Zfp407	0.0316593	0.999629	1.80581	1.80581	201.855	111.781
Atp5g2	ENSMUSG00000062683	Atp5g2	0.00258462	0.818316	0.549663	-1.8193	298.824	543.65
Ndufa13	ENSMUSG00000036199	Ndufa13	0.011902	0.999629	0.5653	-1.76897	148.687	263.023
Psma7	ENSMUSG00000027566	Psma7	0.00284845	0.843182	0.460787	-2.1702	99.9787	216.974
Zdhhc14	ENSMUSG00000034265	Zdhhc14	0.0268838	0.999629	2.1224	2.1224	153.209	72.1868
St6galnac3	ENSMUSG00000052544	St6galnac3	0.00130684	0.664559	4.519	4.519	344.864	76.3143
Rps10	ENSMUSG00000052146	Rps10	0.0371319	0.999629	0.698066	-1.43253	1635.7	2343.19
Cdk2ap2	ENSMUSG00000024856	Cdk2ap2	0.0412336	0.999629	0.606521	-1.64875	107.389	177.057
Acap2	ENSMUSG00000049076	Acap2	0.00401841	0.999629	2.06058	2.06058	170.475	82.7314
Tns3	ENSMUSG00000020422	Tns3	0.0252027	0.999629	2.40205	2.40205	130.832	54.4669
Anxa2	ENSMUSG00000032231	Anxa2	0.0185026	0.999629	0.405502	-2.46608	56.8816	140.274
Mbnl1	ENSMUSG00000027763	Mbnl1	0.0276619	0.999629	1.38795	1.38795	1249.08	899.946
Pdcd4	ENSMUSG00000024975	Pdcd4	0.0208102	0.999629	1.6737	1.6737	289.237	172.812
Kif13b	ENSMUSG00000060012	Kif13b	0.0404408	0.999629	1.75564	1.75564	169.744	96.6851
Mef2c	ENSMUSG00000005583	Mef2c	0.025398	0.999629	1.3949	1.3949	1764.83	1265.2
Rac2	ENSMUSG00000033220	Rac2	0.000105935	0.32646	0.482271	-2.07352	327.362	678.792
Psmb8	ENSMUSG00000024338	Psmb8	0.0272346	0.999629	0.667593	-1.49792	313.781	470.018
Gm26917	ENSMUSG00000097971	.	0.0433675	0.999629	1.65162	1.65162	2821.08	1708.07
Rpl23a	ENSMUSG00000058546	Rpl23a	0.0391676	0.999629	0.639741	-1.56313	224.626	351.12
Top1	ENSMUSG00000070544	Top1	0.0198811	0.999629	0.654237	-1.5285	398.59	609.244
Pa2g4	ENSMUSG00000025364	Pa2g4	0.0422604	0.999629	1.51653	1.51653	218.938	144.368
Rc3h2	ENSMUSG00000075376	Rc3h2	0.0429206	0.999629	1.74157	1.74157	121.373	69.6921
Pnisr	ENSMUSG00000028248	Pnisr	0.0357392	0.999629	1.53104	1.53104	216.136	141.17
Nrf1	ENSMUSG00000058440	Nrf1	0.0273452	0.999629	1.73938	1.73938	183.905	105.731
Nedd8	ENSMUSG00000010376	Nedd8	0.0145406	0.999629	0.562087	-1.77908	134.318	238.964
Tcf12	ENSMUSG00000032228	Tcf12	0.00450618	0.999629	1.79749	1.79749	376.872	209.665
Emg1	ENSMUSG00000004268	Emg1	0.0148224	0.999629	0.521985	-1.91577	80.2715	153.781
Uqcrfs1	ENSMUSG00000038462	Uqcrfs1	0.0304665	0.999629	0.574717	-1.73999	85.7601	149.221
Shprh	ENSMUSG00000090112	Shprh	0.0340987	0.999629	1.91755	1.91755	100.469	52.3944
Vps28	ENSMUSG00000115987	Vps28	0.0387915	0.999629	0.569991	-1.75441	68.9908	121.038
Mef2b	ENSMUSG00000079033	Mef2b	0.000952763	0.547979	0.376769	-2.65414	81.038	215.086
Atp5j	ENSMUSG00000022890	Atp5j	0.0310144	0.999629	0.62842	-1.59129	175.981	280.037
Vpreb3	ENSMUSG00000000903	Vpreb3	0.00182239	0.713909	0.372887	-2.68178	75.2594	201.829
Diaph2	ENSMUSG00000034480	Diaph2	0.0209028	0.999629	1.8514	1.8514	250.917	135.528
Eif3f	ENSMUSG00000031029	Eif3f	0.0313543	0.999629	0.675835	-1.47965	343.645	508.475
Exoc4	ENSMUSG00000029763	Exoc4	0.00600659	0.999629	1.76866	1.76866	507.132	286.733
Klhl24	ENSMUSG00000062901	Klhl24	0.039974	0.999629	1.63994	1.63994	178.92	109.101
Dynll1	ENSMUSG00000009013	Dynll1	0.000206096	0.32646	0.417318	-2.39625	142.491	341.444
Zfp36	ENSMUSG00000044786	Zfp36	0.03393	0.999629	1.82998	1.82998	186.185	101.741
Mlxip	ENSMUSG00000038342	Mlxip	1.1123e-05	0.217511	2.60418	2.60418	224.768	86.3103
Chd2	ENSMUSG00000078671	Chd2	0.0422695	0.999629	1.62684	1.62684	307.209	188.838
Apc	ENSMUSG00000005871	Apc	0.00178899	0.713909	2.01324	2.01324	266.598	132.422
Rbm33	ENSMUSG00000048271	Rbm33	0.0384666	0.999629	1.56859	1.56859	184.547	117.651
Smg7	ENSMUSG00000042772	Smg7	0.000488879	0.434546	2.45362	2.45362	214.505	87.4241
Nsmaf	ENSMUSG00000028245	Nsmaf	0.0235712	0.999629	1.6312	1.6312	178.467	109.409
Pgls	ENSMUSG00000031807	Pgls	0.0295845	0.999629	0.545851	-1.832	72.2606	132.382
Atp5l	ENSMUSG00000038717	Atp5l	0.00642296	0.999629	0.509437	-1.96295	157.464	309.094
Rpl27	ENSMUSG00000063316	Rpl27	0.0122698	0.999629	0.612929	-1.63151	667.63	1089.25
Pibf1	ENSMUSG00000022064	Pibf1	0.0112387	0.999629	2.11703	2.11703	128.981	60.9254
Oaz1	ENSMUSG00000035242	Oaz1	0.000287483	0.32646	0.506525	-1.97423	518.342	1023.33
Ptpn6	ENSMUSG00000004266	Ptpn6	0.0254581	0.999629	0.637648	-1.56826	202.146	317.019
Blvrb	ENSMUSG00000040466	Blvrb	0.0113865	0.999629	0.446332	-2.24048	126.045	282.402
Trim24	ENSMUSG00000029833	Trim24	0.000284812	0.32646	3.10237	3.10237	192.273	61.9762
Ralgps2	ENSMUSG00000026594	Ralgps2	0.00211502	0.720791	1.59426	1.59426	883.718	554.312
Cox8a	ENSMUSG00000035885	Cox8a	0.023599	0.999629	0.597238	-1.67437	300.541	503.218
Nek7	ENSMUSG00000026393	Nek7	0.0326577	0.999629	1.54398	1.54398	535.514	346.839
N4bp2l1	ENSMUSG00000041132	N4bp2l1	0.0358359	0.999629	2.1107	2.1107	98.6888	46.7563
Map3k5	ENSMUSG00000071369	Map3k5	0.0422686	0.999629	1.61748	1.61748	260.964	161.34
Gstp1	ENSMUSG00000060803	Gstp1	0.0331447	0.999629	0.572337	-1.74722	141.366	246.998
Tomm20	ENSMUSG00000093904	Tomm20	0.0205383	0.999629	0.519455	-1.9251	71.4429	137.534
Ywhaq	ENSMUSG00000076432	Ywhaq	0.00157554	0.684662	2.09517	2.09517	172.396	82.2828
Ncoa2	ENSMUSG00000005886	Ncoa2	0.030248	0.999629	1.65032	1.65032	386.175	233.999
Mdh2	ENSMUSG00000019179	Mdh2	0.0290914	0.999629	0.552708	-1.80927	66.2347	119.837
Psmb3	ENSMUSG00000069744	Psmb3	0.0116385	0.999629	0.535983	-1.86573	100.854	188.167
Glcci1	ENSMUSG00000029638	Glcci1	0.00704854	0.999629	2.01499	2.01499	530.159	263.107
Arpc3	ENSMUSG00000029465	Arpc3	0.0324755	0.999629	0.622316	-1.6069	260.272	418.231
AY036118	ENSMUSG00000105361	AY036118	0.0169469	0.999629	0.586749	-1.70431	530.606	904.316
Ecpas	ENSMUSG00000050812	Ecpas	0.0141342	0.999629	1.80945	1.80945	214.885	118.757
Man1a2	ENSMUSG00000008763	Man1a2	0.0161579	0.999629	1.79513	1.79513	245.85	136.954
Tomm7	ENSMUSG00000028998	Tomm7	0.00132538	0.664559	0.423715	-2.36008	95.6229	225.677
Atp6v1g1	ENSMUSG00000039105	Atp6v1g1	0.0230066	0.999629	0.520135	-1.92258	54.2843	104.366
Marcksl1	ENSMUSG00000047945	Marcksl1	0.00826562	0.999629	0.41184	-2.42813	52.3127	127.022
Xbp1	ENSMUSG00000020484	Xbp1	0.0213189	0.999629	2.16088	2.16088	579.854	268.342
Hsbp1	ENSMUSG00000031839	Hsbp1	0.00818981	0.999629	0.425604	-2.3496	42.803	100.57
Mrpl18	ENSMUSG00000057388	Mrpl18	0.0143951	0.999629	0.483961	-2.06628	60.754	125.535
Vav3	ENSMUSG00000033721	Vav3	0.0102199	0.999629	3.43426	3.43426	180.072	52.4341
Umad1	ENSMUSG00000089862	Umad1	0.00588513	0.999629	2.17943	2.17943	200.709	92.0921
Cox7c	ENSMUSG00000017778	Cox7c	0.0096768	0.999629	0.589893	-1.69522	219.259	371.694
Wwox	ENSMUSG00000004637	Wwox	0.0214588	0.999629	2.27314	2.27314	232.856	102.438
Sgms1	ENSMUSG00000040451	Sgms1	0.000690102	0.531078	2.82265	2.82265	198.499	70.3236
Dock8	ENSMUSG00000052085	Dock8	0.0239301	0.999629	1.48198	1.48198	590.766	398.633
Tank	ENSMUSG00000064289	Tank	0.0222935	0.999629	1.64712	1.64712	305.398	185.414
Ctsz	ENSMUSG00000016256	Ctsz	0.0411911	0.999629	0.602488	-1.65978	96.3753	159.962
Exoc6	ENSMUSG00000053799	Exoc6	0.0357094	0.999629	1.82233	1.82233	109.198	59.9223
Calm1	ENSMUSG00000001175	Calm1	0.0381884	0.999629	0.693193	-1.4426	563.477	812.872
Fut8	ENSMUSG00000021065	Fut8	0.0166316	0.999629	1.95005	1.95005	804.08	412.339
Uggt1	ENSMUSG00000037470	Uggt1	0.048845	0.999629	1.68574	1.68574	152.392	90.401
Immp2l	ENSMUSG00000056899	Immp2l	0.000831993	0.547979	2.78767	2.78767	674.947	242.119
Ppig	ENSMUSG00000042133	Ppig	0.045168	0.999629	1.62495	1.62495	156.713	96.442
Wdr7	ENSMUSG00000040560	Wdr7	0.0439455	0.999629	1.73796	1.73796	126.821	72.9712
Psmb10	ENSMUSG00000031897	Psmb10	0.0215295	0.999629	0.508488	-1.96661	54.4826	107.146
Cd52	ENSMUSG00000000682	Cd52	0.00135944	0.664597	0.543473	-1.84002	938.43	1726.73
Sec61g	ENSMUSG00000078974	Sec61g	0.00567672	0.999629	0.567069	-1.76345	204.554	360.721
Pds5b	ENSMUSG00000034021	Pds5b	0.0466139	0.999629	1.6378	1.6378	176.454	107.738
Csnk2b	ENSMUSG00000024387	Csnk2b	0.00072595	0.531078	0.375677	-2.66186	59.0574	157.202
Rsf1	ENSMUSG00000035623	Rsf1	0.0484443	0.999629	1.62974	1.62974	210.055	128.889
Utrn	ENSMUSG00000019820	Utrn	0.0179571	0.999629	2.43309	2.43309	208.189	85.5656
Tnrc6a	ENSMUSG00000052707	Tnrc6a	0.0207636	0.999629	1.71405	1.71405	211.408	123.338
Fndc3a	ENSMUSG00000033487	Fndc3a	0.040941	0.999629	2.07139	2.07139	726.861	350.905
Phtf2	ENSMUSG00000039987	Phtf2	0.0141147	0.999629	2.02317	2.02317	235.665	116.483
Cfl1	ENSMUSG00000056201	Cfl1	0.00288894	0.843182	0.561952	-1.77951	548.524	976.105
Cox4i1	ENSMUSG00000031818	Cox4i1	0.0282592	0.999629	0.642072	-1.55746	368.365	573.712
Arpc5	ENSMUSG00000008475	Arpc5	0.00957804	0.999629	0.588855	-1.69821	156.576	265.899
Cox17	ENSMUSG00000046516	Cox17	0.0219952	0.999629	0.573439	-1.74387	124.911	217.829
Dennd1a	ENSMUSG00000035392	Dennd1a	0.00531831	0.999629	1.91155	1.91155	327.831	171.5
Rpl26	ENSMUSG00000060938	Rpl26	0.00428427	0.999629	0.599565	-1.66787	536.801	895.316
Lsm6	ENSMUSG00000031683	Lsm6	0.0193777	0.999629	0.51276	-1.95023	84.7478	165.278
Strn3	ENSMUSG00000020954	Strn3	0.0323879	0.999629	1.54879	1.54879	285.822	184.545
Cep295	ENSMUSG00000046111	Cep295	0.0494026	0.999629	1.89906	1.89906	114.353	60.2156
Tap2	ENSMUSG00000024339	Tap2	0.00386659	0.999629	0.474173	-2.10894	68.8967	145.299
Higd1a	ENSMUSG00000038412	Higd1a	0.0302439	0.999629	0.528336	-1.89273	56.6906	107.3
Gnaq	ENSMUSG00000024639	Gnaq	0.00904671	0.999629	1.97697	1.97697	259.443	131.233
Satb1	ENSMUSG00000023927	Satb1	0.0350117	0.999629	2.17195	2.17195	130.837	60.2397
Ubxn4	ENSMUSG00000026353	Ubxn4	0.0373635	0.999629	1.65347	1.65347	242.168	146.461
Dock10	ENSMUSG00000038608	Dock10	0.000517442	0.439938	2.39133	2.39133	670.412	280.352
Ppp1r11	ENSMUSG00000036398	Ppp1r11	0.0352482	0.999629	0.564777	-1.77061	63.7134	112.812
Psma2	ENSMUSG00000015671	Psma2	0.0307361	0.999629	0.588346	-1.69968	106.607	181.198
Acbd5	ENSMUSG00000026781	Acbd5	0.0440484	0.999629	1.73619	1.73619	125.057	72.0296
Map2k5	ENSMUSG00000058444	Map2k5	0.0419038	0.999629	1.78684	1.78684	125.194	70.0641
Ppp2r5a	ENSMUSG00000026626	Ppp2r5a	0.0411685	0.999629	1.50118	1.50118	273.686	182.314
Akr1a1	ENSMUSG00000028692	Akr1a1	0.0382881	0.999629	0.595305	-1.67981	77.0234	129.385
Atp5a1	ENSMUSG00000025428	Atp5a1	0.0134597	0.999629	0.59525	-1.67997	154.686	259.867
Tnfrsf13c	ENSMUSG00000068105	Tnfrsf13c	0.00212755	0.720791	0.507579	-1.97014	135.161	266.285
Pik3ca	ENSMUSG00000027665	Pik3ca	0.00421635	0.999629	2.16115	2.16115	156.095	72.2278
Selenow	ENSMUSG00000041571	Selenow	0.0455316	0.999629	0.67674	-1.47767	241.316	356.586
Psd3	ENSMUSG00000030465	Psd3	0.0266397	0.999629	2.3239	2.3239	112.836	48.5544
Mrpl54	ENSMUSG00000034932	Mrpl54	0.0342584	0.999629	0.466759	-2.14243	39.5122	84.6522
Ptprcap	ENSMUSG00000045826	Ptprcap	0.00777456	0.999629	0.554106	-1.80471	203.225	366.761
Tomm6	ENSMUSG00000033475	Tomm6	0.0107146	0.999629	0.528394	-1.89253	109.693	207.597
Epn1	ENSMUSG00000035203	Epn1	0.0398277	0.999629	0.597629	-1.67328	83.2369	139.278
Hist1h3e	ENSMUSG00000069273	.	0.0470019	0.999629	1.98955	1.98955	126.464	63.564
Dynlrb1	ENSMUSG00000047459	Dynlrb1	0.0435079	0.999629	0.546168	-1.83094	56.7768	103.955
Psma3	ENSMUSG00000060073	Psma3	0.0436429	0.999629	0.638036	-1.56731	117.617	184.342
Tmem167	ENSMUSG00000012422	Tmem167	0.0202865	0.999629	0.542202	-1.84433	70.8736	130.714
Il5ra	ENSMUSG00000005364	Il5ra	0.0381626	0.999629	3.10753	3.10753	145.297	46.7563
Cdkal1	ENSMUSG00000006191	Cdkal1	0.0455938	0.999629	1.79036	1.79036	157.133	87.7659
Ddb1	ENSMUSG00000024740	Ddb1	0.0298443	0.999629	0.502893	-1.9885	41.1247	81.7763
Gng5	ENSMUSG00000068523	Gng5	0.0104997	0.999629	0.55384	-1.80558	169.534	306.107
Cnn2	ENSMUSG00000004665	Cnn2	0.00552522	0.999629	0.522293	-1.91463	181.427	347.366
Actg1	ENSMUSG00000062825	Actg1	0.0433179	0.999629	0.676537	-1.47812	986.191	1457.7
Ube2v1	ENSMUSG00000078923	Ube2v1	0.0207448	0.999629	0.515754	-1.93891	56.2883	109.138
Psme2	ENSMUSG00000079197	Psme2	0.0236042	0.999629	0.594854	-1.68108	127.14	213.732
Elob	ENSMUSG00000055839	Elob	0.00691432	0.999629	0.549761	-1.81897	188.848	343.509
Snx8	ENSMUSG00000029560	Snx8	0.0182484	0.999629	0.512898	-1.9497	61.4893	119.886
Slc25a3	ENSMUSG00000061904	Slc25a3	0.0384227	0.999629	0.676689	-1.47778	226.355	334.504
Wdr44	ENSMUSG00000036769	Wdr44	0.0416002	0.999629	1.8185	1.8185	140.875	77.4678
Vps13b	ENSMUSG00000037646	Vps13b	0.0297112	0.999629	1.52067	1.52067	404.248	265.836
Camk2d	ENSMUSG00000053819	Camk2d	0.0333016	0.999629	1.53173	1.53173	668.16	436.214
Cox14	ENSMUSG00000023020	Cox14	0.0406347	0.999629	0.538626	-1.85657	46.368	86.0856
Abi1	ENSMUSG00000058835	Abi1	0.0248546	0.999629	1.58692	1.58692	249.456	157.195
Man2a1	ENSMUSG00000024085	Man2a1	0.000361958	0.353905	2.19091	2.19091	535.012	244.197
Slmap	ENSMUSG00000021870	Slmap	0.0498447	0.999629	1.63294	1.63294	152.115	93.1537
Fas	ENSMUSG00000024778	Fas	0.00285745	0.843182	0.39821	-2.51124	50.2298	126.139
2023-03-01	ENSMUSG00000036469	.	0.0064565	0.999629	1.96424	1.96424	796.98	405.746
Fermt3	ENSMUSG00000024965	Fermt3	0.048575	0.999629	0.633902	-1.57753	112.883	178.077
Cdk19	ENSMUSG00000038481	Cdk19	0.0136298	0.999629	1.93205	1.93205	176.603	91.4066
Ppp4r3b	ENSMUSG00000020463	Ppp4r3b	0.0359056	0.999629	1.55601	1.55601	225.052	144.634
Kmt2c	ENSMUSG00000038056	Kmt2c	0.0118423	0.999629	1.69377	1.69377	355.752	210.035
Hdac9	ENSMUSG00000004698	Hdac9	0.0167967	0.999629	1.8945	1.8945	555.241	293.081
Hist1h1e	ENSMUSG00000051627	.	0.0379473	0.999629	1.76302	1.76302	289.488	164.2
Pafah1b3	ENSMUSG00000005447	Pafah1b3	0.0267487	0.999629	0.494271	-2.02318	79.8226	161.495
Fnip1	ENSMUSG00000035992	Fnip1	0.0198591	0.999629	1.91359	1.91359	129.124	67.4773
Mycbp2	ENSMUSG00000033004	Mycbp2	0.00189214	0.713909	1.75315	1.75315	749.459	427.492
Tut4	ENSMUSG00000034610	Tut4	0.013952	0.999629	1.51566	1.51566	576.722	380.508
Tlk1	ENSMUSG00000041997	Tlk1	0.0391631	0.999629	1.44164	1.44164	398.564	276.466
Sec24b	ENSMUSG00000001052	Sec24b	0.0264671	0.999629	1.79934	1.79934	134.367	74.6756
Swi5	ENSMUSG00000044627	Swi5	0.0128354	0.999629	0.496855	-2.01266	74.8011	150.549
Smad4	ENSMUSG00000024515	Smad4	0.00810368	0.999629	2.05516	2.05516	140.889	68.5535
Tmem160	ENSMUSG00000019158	Tmem160	0.0311045	0.999629	0.555271	-1.80092	52.2688	94.1321
Ino80	ENSMUSG00000034154	Ino80	0.037906	0.999629	1.81048	1.81048	138.085	76.2698
Rbm6	ENSMUSG00000032582	Rbm6	0.000928409	0.547979	1.9144	1.9144	243.98	127.445
Trmt112	ENSMUSG00000038812	Trmt112	0.018113	0.999629	0.560215	-1.78503	117.453	209.657
Mecp2	ENSMUSG00000031393	Mecp2	0.0166587	0.999629	1.93239	1.93239	129.211	66.8657
Fcrla	ENSMUSG00000038421	Fcrla	0.0217807	0.999629	0.596517	-1.6764	121.975	204.479
Rbm38	ENSMUSG00000027510	Rbm38	0.0157328	0.999629	0.492371	-2.03099	56.769	115.297
Rbm3	ENSMUSG00000031167	Rbm3	0.000285529	0.32646	0.478902	-2.08811	239.365	499.82
Scand1	ENSMUSG00000046229	Scand1	0.00341589	0.940814	0.462218	-2.16348	72.2302	156.269
Gm4258	ENSMUSG00000098243	Gm4258	0.00269595	0.82374	3.19681	3.19681	209.028	65.3865
Ftx	ENSMUSG00000086370	Ftx	0.00560944	0.999629	2.07546	2.07546	188.895	91.0139
Kdm7a	ENSMUSG00000042599	Kdm7a	0.012738	0.999629	2.01177	2.01177	159.874	79.4697
Xist	ENSMUSG00000086503	Xist	0.0281023	0.999629	1.75371	1.75371	848.65	483.917
Atp6v1f	ENSMUSG00000004285	Atp6v1f	0.00420429	0.999629	0.485027	-2.06174	91.7477	189.16
Fam169b	ENSMUSG00000074071	Fam169b	0.0124732	0.999629	2.0966	2.0966	161.35	76.9583
Tnks	ENSMUSG00000031529	Tnks	0.0408277	0.999629	1.82227	1.82227	138.955	76.2537
Gpcpd1	ENSMUSG00000027346	Gpcpd1	0.0396541	0.999629	1.64323	1.64323	260.766	158.691
Mzb1	ENSMUSG00000024353	Mzb1	0.0296176	0.999629	0.633916	-1.5775	568.847	897.354
Rrm2b	ENSMUSG00000022292	Rrm2b	0.0496945	0.999629	0.558885	-1.78928	52.3025	93.5836
Gabarapl2	ENSMUSG00000031950	Gabarapl2	0.0356137	0.999629	0.575469	-1.73771	91.4486	158.912
Mrpl23	ENSMUSG00000037772	Mrpl23	0.00695318	0.999629	0.434569	-2.30113	46.368	106.699
Clk1	ENSMUSG00000026034	Clk1	0.0483675	0.999629	0.614498	-1.62734	92.6816	150.825
Atp5md	ENSMUSG00000071528	Atp5md	0.0273573	0.999629	0.581821	-1.71874	129.741	222.991
Ndufa1	ENSMUSG00000016427	Ndufa1	0.0314441	0.999629	0.569563	-1.75573	98.5448	173.018
Cpeb3	ENSMUSG00000039652	Cpeb3	0.0309428	0.999629	2.94325	2.94325	398.046	135.24
Eefsec	ENSMUSG00000033216	Eefsec	0.0334982	0.999629	1.84373	1.84373	143.544	77.8551
Psmb2	ENSMUSG00000028837	Psmb2	0.0493156	0.999629	0.622903	-1.60539	99.4946	159.727
Smurf2	ENSMUSG00000018363	Smurf2	0.0496136	0.999629	1.75079	1.75079	130.548	74.5655
Uqcrq	ENSMUSG00000044894	Uqcrq	0.00843887	0.999629	0.509365	-1.96323	90.9813	178.617
Eloc	ENSMUSG00000079658	Eloc	0.0430588	0.999629	0.574891	-1.73946	69.0943	120.187
Ost4	ENSMUSG00000038803	Ost4	0.0137927	0.999629	0.571175	-1.75078	118.278	207.078
Snx2	ENSMUSG00000034484	Snx2	0.00142457	0.674691	1.90185	1.90185	454.761	239.115
Jtb	ENSMUSG00000027937	Jtb	0.0271947	0.999629	0.502289	-1.99089	46.368	92.3134
Ghitm	ENSMUSG00000041028	Ghitm	0.0165098	0.999629	0.517206	-1.93346	78.5625	151.898
Mrpl43	ENSMUSG00000025208	Mrpl43	0.00961541	0.999629	0.487113	-2.05291	50.2298	103.117
Snrpf	ENSMUSG00000020018	Snrpf	0.0182171	0.999629	0.523498	-1.91023	83.5481	159.596
Ppp1r18	ENSMUSG00000034595	Ppp1r18	0.0359114	0.999629	0.536834	-1.86277	52.2941	97.4121
Sla	ENSMUSG00000022372	Sla	0.042992	0.999629	1.96809	1.96809	123.299	62.6493
Smg6	ENSMUSG00000038290	Smg6	0.00247606	0.806991	1.90414	1.90414	290.283	152.448
Uqcr11	ENSMUSG00000020163	Uqcr11	0.0297666	0.999629	0.572214	-1.7476	90.1718	157.584
Dock11	ENSMUSG00000031093	Dock11	0.0380137	0.999629	1.59828	1.59828	270.15	169.026
Cytip	ENSMUSG00000026832	Cytip	0.0492136	0.999629	1.53604	1.53604	257.092	167.373
Prdm1	ENSMUSG00000038151	Prdm1	0.0127444	0.999629	2.78767	2.78767	171.151	61.3957
Skil	ENSMUSG00000027660	Skil	0.0283705	0.999629	1.93768	1.93768	142.021	73.2947
Smdt1	ENSMUSG00000022452	Smdt1	0.0176105	0.999629	0.556068	-1.79834	111.299	200.153
Atp5mpl	ENSMUSG00000021290	Atp5mpl	0.0304866	0.999629	0.593076	-1.68613	129.176	217.807
Ndufa11	ENSMUSG00000002379	Ndufa11	0.0454221	0.999629	0.575241	-1.7384	88.2027	153.332
Tmem154	ENSMUSG00000056498	Tmem154	0.0289891	0.999629	2.05255	2.05255	149.114	72.6483
Pou2f1	ENSMUSG00000026565	Pou2f1	0.0330198	0.999629	1.72004	1.72004	174.316	101.344
Runx1	ENSMUSG00000022952	Runx1	0.0304435	0.999629	1.68616	1.68616	417.376	247.53
Brd4	ENSMUSG00000024002	Brd4	0.0186389	0.999629	1.49864	1.49864	306.085	204.242
Tmem179b	ENSMUSG00000118346	Tmem179b	0.0389659	0.999629	0.557593	-1.79342	58.9979	105.808
C2cd3	ENSMUSG00000047248	C2cd3	0.0330499	0.999629	1.82641	1.82641	126.028	69.003
Arih1	ENSMUSG00000025234	Arih1	0.00465254	0.999629	1.74848	1.74848	270.977	154.979
Cox5b	ENSMUSG00000061518	Cox5b	0.0499283	0.999629	0.625758	-1.59806	172.699	275.983
Mga	ENSMUSG00000033943	Mga	0.015734	0.999629	2.02673	2.02673	144.43	71.2629

[truncated: 14 more sheets: Spleen_Regulatory_HF vs sham, Spleen_Regulatory_New MI v sham, Spleen_Memory_HF vs sham, Spleen_Memory_New MI vs sham, Spleen_MZB_New MI vs sham, Spleen_Plasma_HF vs sham, Heart_HF vs sham, Heart_New MI vs sham, Heart_B1_HF vs sham, Heart_B1_New MI vs sham, Heart_Follicular_HF vs sham, Heart_Follicular_New MI vs sham, Heart_Memory-like_HF vs sham, Heart_Memory-like_MI vs sham]
