# Supplementary material for: B cell-mediated antigen presentation promotes adverse cardiac remodeling in chronic heart failure
Source: Research Square preprint supplement (doi:10.21203/rs.3.rs-4536350/v1), 2024-06-24
Supplement: Supplementary file 2 [file 325b761be5685fab9e2be2a3.xlsx]

## Sheet: ICM vs control 
Ensembl ID	P-value	FDR step up	Ratio	Fold change	LSMean(ICM)	LSMean(Control)		Genes differentially expressed in antigen processing and presentation
ENSG00000140988	3.27452e-221	9.57142e-218	2.06906	2.06906	8038.66	3885.17		Gene Symbol	Gene Description
ENSG00000127528	3.63969e-18	2.53305e-16	1.98796	1.98796	384.654	193.492		HLA-DMB	major histocompatibility complex, class II, DM beta
ENSG00000172183	6.07234e-18	4.03397e-16	1.96081	1.96081	416.018	212.167		HLA-DQA2	major histocompatibility complex, class II, DQ alpha 2
ENSG00000203875	7.62731e-20	5.71657e-18	1.90541	1.90541	472.792	248.131		HLA-DQB1	major histocompatibility complex, class II, DQ beta 1
ENSG00000231500	3.51708e-48	2.05609e-45	1.35682	1.35682	11137	8208.16		TAPBP	TAP binding protein
ENSG00000244313	7.52667e-15	4.15103e-13	1.88104	1.88104	279.73	148.71		CALR	calreticulin
ENSG00000051523	4.84023e-41	1.179e-38	1.83997	1.83997	1337.57	726.952
ENSG00000105369	6.22918e-32	9.10395e-30	1.81285	1.81285	1377.52	759.867
ENSG00000211459	1.96024e-14	1.01233e-12	1.74824	1.74824	432.528	247.408
ENSG00000188820	8.23291e-08	1.95649e-06	1.73524	1.73524	200.561	115.581
ENSG00000233276	3.05209e-08	7.56039e-07	1.63271	1.63271	225.482	138.103
ENSG00000198840	9.69408e-33	1.57421e-30	1.6073	1.6073	1993.14	1240.05
ENSG00000179344	1.9741e-14	1.01233e-12	1.55795	1.55795	938.721	602.535
ENSG00000105640	5.66053e-39	1.18184e-36	1.34142	1.34142	7742.52	5771.89
ENSG00000108298	2.71888e-35	5.29819e-33	1.32259	1.32259	5366.51	4057.57
ENSG00000242574	1.36566e-09	4.15814e-08	1.55595	1.55595	406.106	261.002
ENSG00000198918	6.03724e-33	1.03805e-30	1.29355	1.29355	7526.61	5818.55
ENSG00000168255	8.69444e-06	0.000162909	1.54344	1.54344	209.022	135.426
ENSG00000128218	1.70239e-06	3.57991e-05	1.52425	1.52425	330.939	217.115
ENSG00000122986	1.01353e-07	2.35124e-06	1.52351	1.52351	397.061	260.621
ENSG00000198804	7.22962e-32	1.00629e-29	1.32886	1.32886	6802.92	5119.38
ENSG00000124614	2.11586e-30	2.8112e-28	0.716292	-1.39608	1870.09	2610.79
ENSG00000145592	1.24503e-29	1.58227e-27	1.35797	1.35797	3496.34	2574.67
ENSG00000009790	2.18977e-07	4.92362e-06	1.51696	1.51696	278.367	183.503
ENSG00000169442	1.11798e-34	2.0424e-32	1.51159	1.51159	3478.53	2301.24
ENSG00000185862	1.19674e-07	2.75438e-06	1.49508	1.49508	376.251	251.659
ENSG00000142937	6.08114e-28	6.5834e-26	1.27803	1.27803	6278.09	4912.3
ENSG00000164543	5.65077e-06	0.000108666	1.49375	1.49375	258.017	172.731
ENSG00000089248	9.33815e-08	2.18363e-06	1.49093	1.49093	327.091	219.388
ENSG00000142534	6.87368e-26	6.69725e-24	1.36404	1.36404	2938.79	2154.47
ENSG00000125691	1.75944e-26	1.7734e-24	1.48847	1.48847	1838.04	1234.85
ENSG00000253701	0.0301219	0.193935	1.46753	1.46753	377.615	257.314
ENSG00000146278	5.71997e-08	1.39329e-06	1.45699	1.45699	431.432	296.112
ENSG00000109475	1.20549e-21	1.03636e-19	1.22201	1.22201	9828.97	8043.26
ENSG00000063177	7.58807e-40	1.70615e-37	1.44754	1.44754	3367.28	2326.21
ENSG00000034510	9.63346e-21	7.82184e-19	1.35243	1.35243	4242.93	3137.27
ENSG00000147403	2.10012e-20	1.6591e-18	1.1891	1.1891	11246	9457.58
ENSG00000196126	1.56382e-17	9.93705e-16	1.43716	1.43716	2032.17	1414.02
ENSG00000196735	2.9341e-09	8.57638e-08	1.42802	1.42802	746.425	522.699
ENSG00000134419	1.59202e-19	1.16337e-17	1.21143	1.21143	6677.85	5512.37
ENSG00000164587	1.22442e-18	8.72919e-17	1.20433	1.20433	7266.3	6033.48
ENSG00000198938	2.24388e-42	7.28763e-40	1.42607	1.42607	3763.16	2638.82
ENSG00000152082	0.000178843	0.00262692	1.42272	1.42272	187.781	131.988
ENSG00000247982	3.26681e-06	6.36592e-05	1.42012	1.42012	494.71	348.359
ENSG00000169413	0.00146513	0.0164715	1.4118	1.4118	197.931	140.198
ENSG00000143933	2.46364e-08	6.20796e-07	1.40266	1.40266	573.691	409.001
ENSG00000271614	0.0153589	0.120683	0.711203	-1.40607	102.852	144.617
ENSG00000108107	4.21811e-17	2.56865e-15	1.21532	1.21532	4724.84	3887.74
ENSG00000153187	1.00526e-05	0.000183648	0.710556	-1.40735	208.647	293.639
ENSG00000166710	5.5609e-16	3.2509e-14	1.20319	1.20319	11440.3	9508.31
ENSG00000120008	0.0455663	0.252733	0.71036	-1.40774	93.8639	132.136
ENSG00000130255	2.66846e-15	1.49998e-13	1.2167	1.2167	4420	3632.77
ENSG00000168137	0.0433506	0.243925	0.709939	-1.40857	95.3039	134.242
ENSG00000144713	9.91114e-15	5.36486e-13	1.17544	1.17544	7813.42	6647.2
ENSG00000134333	0.000385669	0.00534271	0.708893	-1.41065	145.742	205.591
ENSG00000198791	0.001139	0.013479	0.707446	-1.41353	118.303	167.225
ENSG00000226752	0.00539155	0.0515016	0.706564	-1.4153	109.219	154.577
ENSG00000223865	4.39147e-14	2.21315e-12	1.36313	1.36313	2182.5	1601.1
ENSG00000142541	4.79546e-14	2.37578e-12	1.14973	1.14973	11434.5	9945.38
ENSG00000227507	7.27933e-14	3.54625e-12	1.3891	1.3891	2621.51	1887.19
ENSG00000152558	0.000569212	0.00736197	0.706246	-1.41594	129.198	182.936
ENSG00000166441	1.26458e-13	5.96187e-12	1.17851	1.17851	5531.28	4693.44
ENSG00000171863	2.01786e-13	9.36225e-12	1.21495	1.21495	3196.78	2631.2
ENSG00000221983	3.12616e-13	1.42778e-11	1.24815	1.24815	2132.61	1708.62
ENSG00000108654	4.68203e-13	2.10547e-11	0.727189	-1.37516	711.424	978.32
ENSG00000167526	8.55367e-13	3.78824e-11	1.14789	1.14789	10919.7	9512.85
ENSG00000168259	0.000947211	0.0114409	0.70601	-1.41641	119.675	169.51
ENSG00000204252	0.0246575	0.169986	0.705847	-1.41674	97.87	138.656
ENSG00000177954	1.28647e-12	5.44979e-11	1.15928	1.15928	18622.6	16064
ENSG00000210082	1.83782e-12	7.67422e-11	0.788686	-1.26793	1793.41	2273.92
ENSG00000198888	1.9632e-12	8.08231e-11	0.771194	-1.29669	1279.25	1658.79
ENSG00000079332	0.0399029	0.232343	0.705105	-1.41823	94.8108	134.463
ENSG00000234745	2.80666e-12	1.12382e-10	1.25851	1.25851	2530.22	2010.49
ENSG00000196562	0.012853	0.104409	0.704551	-1.41934	100.932	143.257
ENSG00000147604	3.58623e-12	1.39767e-10	0.861655	-1.16056	4473.99	5192.32
ENSG00000136942	3.82619e-12	1.47157e-10	1.20337	1.20337	3549.06	2949.28
ENSG00000008988	1.09757e-11	4.16649e-10	1.19456	1.19456	3445.27	2884.13
ENSG00000114942	1.55803e-11	5.83863e-10	0.78527	-1.27345	1196.36	1523.5
ENSG00000104904	2.0676e-11	7.65011e-10	1.2973	1.2973	1334.55	1028.71
ENSG00000236552	0.0222817	0.159631	0.704369	-1.41971	98.6377	140.037
ENSG00000177600	7.73014e-11	2.78953e-09	1.15357	1.15357	8157.87	7071.87
ENSG00000009307	0.000117764	0.00179283	0.7042	-1.42005	139.192	197.659
ENSG00000052841	0.0326368	0.203841	0.703973	-1.42051	94.4554	134.175
ENSG00000213741	1.05292e-10	3.66392e-09	1.15496	1.15496	8493.78	7354.15
ENSG00000158985	9.54628e-05	0.00149218	0.703187	-1.4221	144.719	205.805
ENSG00000070756	1.33222e-10	4.52799e-09	0.751157	-1.33128	763.809	1016.84
ENSG00000174748	2.19899e-10	7.3881e-09	1.14883	1.14883	4971.72	4327.62
ENSG00000137133	0.0469172	0.256328	0.702038	-1.42442	91.1947	129.9
ENSG00000122565	0.000428541	0.00581292	0.699853	-1.42887	129.576	185.147
ENSG00000251562	4.5826e-10	1.48833e-08	0.873214	-1.14519	67218	76977.7
ENSG00000198886	4.9018e-10	1.5745e-08	0.854827	-1.16983	3392.33	3968.44
ENSG00000133106	0.00670211	0.0614115	0.699444	-1.42971	108.219	154.722
ENSG00000218175	0.0337302	0.209328	0.698174	-1.43231	94.3877	135.192
ENSG00000197958	6.47912e-10	2.01473e-08	1.17587	1.17587	4510.17	3835.61
ENSG00000162244	1.31214e-09	4.03725e-08	1.19211	1.19211	2674.37	2243.39
ENSG00000100644	0.0459319	0.252842	0.698174	-1.43231	91.617	131.224
ENSG00000198695	0.0202363	0.149748	0.697624	-1.43344	99.9566	143.281
ENSG00000019582	1.67917e-09	5.00837e-08	1.18807	1.18807	10224.6	8606.07
ENSG00000185650	9.04032e-06	0.000167246	0.697468	-1.43376	232.257	333.001
ENSG00000166012	0.00070858	0.00898142	0.69621	-1.43635	122.166	175.473
ENSG00000134283	0.00234373	0.025483	0.69517	-1.4385	110.958	159.613
ENSG00000130522	0.00558463	0.0529995	0.694994	-1.43886	103.639	149.123
ENSG00000100461	0.00731819	0.0662262	0.694696	-1.43948	103.344	148.762
ENSG00000164691	0.000832444	0.0101385	0.692715	-1.4436	124.312	179.457
ENSG00000173889	0.03387	0.20964	0.692161	-1.44475	92.3891	133.479
ENSG00000085832	0.0136992	0.109706	0.692047	-1.44499	97.6967	141.171
ENSG00000166888	0.0183376	0.139223	0.691494	-1.44614	96.6722	139.802
ENSG00000160194	0.0423113	0.241555	0.691166	-1.44683	89.77	129.882
ENSG00000167658	1.08076e-08	2.89823e-07	0.801275	-1.24801	1141.73	1424.89
ENSG00000112081	1.95449e-06	3.99508e-05	0.690658	-1.4479	205.19	297.093
ENSG00000132475	1.21821e-08	3.20794e-07	0.769702	-1.2992	748.661	972.664
ENSG00000142676	1.42942e-08	3.73054e-07	1.12819	1.12819	6447.23	5714.67
ENSG00000280138	0.0288418	0.189071	0.690257	-1.44874	94.6464	137.118
ENSG00000138639	0.00235887	0.0255369	0.690217	-1.44882	111.407	161.409
ENSG00000104408	1.9649e-08	4.99426e-07	1.38877	1.38877	566.401	407.843
ENSG00000054267	0.000167241	0.00249412	0.690083	-1.4491	125.641	182.066
ENSG00000204525	2.66076e-08	6.64736e-07	1.22159	1.22159	2285.82	1871.18
ENSG00000126777	0.000111823	0.0017113	0.689393	-1.45055	131.989	191.457
ENSG00000176731	0.00130673	0.0151571	0.689232	-1.45089	115.54	167.636
ENSG00000223361	0.0197214	0.147431	0.688988	-1.4514	95.0637	137.976
ENSG00000139725	0.00996583	0.0856768	0.687765	-1.45399	100.085	145.522
ENSG00000213442	0.000349108	0.00495361	0.684	-1.46199	121.971	178.32
ENSG00000108946	0.0104202	0.0885417	0.681391	-1.46759	96.6736	141.877
ENSG00000096384	8.88144e-08	2.09358e-06	0.736061	-1.35858	451.655	613.611
ENSG00000272398	5.22499e-05	0.000853221	0.68043	-1.46966	161.325	237.092
ENSG00000159140	1.17433e-08	3.12052e-07	0.679135	-1.47246	263.685	388.265
ENSG00000101745	2.37994e-06	4.73235e-05	0.678856	-1.47307	181.224	266.956
ENSG00000044574	0.0172275	0.132168	0.678538	-1.47376	111.04	163.646
ENSG00000197756	2.09986e-07	4.75806e-06	1.146	1.146	3012.41	2628.62
ENSG00000158195	1.42888e-05	0.000256233	0.67845	-1.47395	141.452	208.493
ENSG00000083845	2.67169e-07	5.96133e-06	1.1436	1.1436	3554.89	3108.5
ENSG00000170315	3.72585e-07	8.24831e-06	1.32143	1.32143	744.173	563.157
ENSG00000182899	3.75308e-07	8.24831e-06	1.12868	1.12868	4361.5	3864.25
ENSG00000198727	8.36113e-07	1.82385e-05	1.18356	1.18356	2096.04	1770.95
ENSG00000108518	9.85201e-07	2.13314e-05	1.29787	1.29787	1345.73	1036.87
ENSG00000134330	0.00596561	0.0558894	0.678054	-1.47481	100.723	148.547
ENSG00000170144	3.37442e-06	6.53208e-05	0.676753	-1.47764	171.533	253.465
ENSG00000198786	1.23693e-10	4.25357e-09	0.675145	-1.48116	367.778	544.74
ENSG00000198624	0.0223669	0.159849	0.673668	-1.48441	92.9218	137.934
ENSG00000063046	1.72269e-06	3.59674e-05	0.673632	-1.48449	160.482	238.235
ENSG00000198712	1.80045e-06	3.73242e-05	1.12273	1.12273	4521.44	4027.17
ENSG00000177576	0.0355412	0.216883	0.673584	-1.4846	88.387	131.219
ENSG00000178464	0.0199474	0.148362	0.672978	-1.48593	93.0632	138.286
ENSG00000089327	2.06574e-06	4.19316e-05	1.37053	1.37053	454.188	331.397
ENSG00000109046	0.000652014	0.00839576	0.672582	-1.48681	112.73	167.608
ENSG00000131143	2.32218e-06	4.64914e-05	1.23711	1.23711	930.371	752.053
ENSG00000140332	0.0103705	0.0884081	0.667983	-1.49704	96.058	143.803
ENSG00000168036	0.0292083	0.18994	0.66753	-1.49806	89.6813	134.348
ENSG00000011295	0.00135151	0.0155456	0.666752	-1.49981	103.623	155.415
ENSG00000265972	4.90736e-18	3.33586e-16	0.665825	-1.5019	1085.92	1630.94
ENSG00000029363	0.000745695	0.00931482	0.664889	-1.50401	107.832	162.181
ENSG00000152518	1.87608e-08	4.82821e-07	0.661295	-1.51219	293.291	443.511
ENSG00000242125	0.000960212	0.0115502	0.657583	-1.52072	108.285	164.672
ENSG00000204628	7.37779e-06	0.000140034	1.14381	1.14381	2381.29	2081.9
ENSG00000231925	8.19317e-08	1.95649e-06	0.657502	-1.52091	189.902	288.824
ENSG00000156030	0.00404602	0.0403636	0.656952	-1.52218	97.5636	148.509
ENSG00000148303	8.93344e-06	0.000166321	1.14767	1.14767	2117.38	1844.93
ENSG00000273319	0.0159517	0.124338	0.656345	-1.52359	91.6178	139.588
ENSG00000283041	2.14442e-17	1.33365e-15	0.651671	-1.53452	547.1	839.534
ENSG00000242299	0.00219574	0.0242195	0.650546	-1.53717	98.5565	151.498
ENSG00000067560	1.28138e-05	0.000232639	0.72638	-1.37669	227.602	313.338
ENSG00000234741	1.40738e-05	0.000253936	1.25596	1.25596	802.66	639.083
ENSG00000136167	9.20918e-06	0.000169298	0.650205	-1.53798	144.032	221.518
ENSG00000130755	1.66813e-05	0.000297314	1.38824	1.38824	318.798	229.642
ENSG00000112306	1.74076e-05	0.000308378	0.903073	-1.10733	6145.6	6805.21
ENSG00000092820	1.44459e-09	4.35314e-08	0.649971	-1.53853	239.588	368.613
ENSG00000169714	8.42761e-11	3.00414e-09	0.649791	-1.53896	260.427	400.785
ENSG00000113387	1.98187e-05	0.000344822	1.38124	1.38124	439.332	318.07
ENSG00000175567	2.04224e-05	0.000353223	0.753691	-1.3268	359.636	477.166
ENSG00000171858	2.25761e-05	0.000388176	0.856819	-1.16711	1989.85	2322.37
ENSG00000177733	2.35266e-05	0.000402153	0.725637	-1.3781	204.119	281.297
ENSG00000145088	0.00137572	0.0157079	0.647698	-1.54393	103.935	160.468
ENSG00000115268	2.73331e-05	0.000461819	1.09312	1.09312	5550.02	5077.2
ENSG00000215030	3.79789e-05	0.000638002	0.647093	-1.54537	118.276	182.78
ENSG00000205542	3.99824e-05	0.000667819	1.11205	1.11205	11274.4	10138.4
ENSG00000145425	4.1487e-05	0.000689015	0.911366	-1.09725	4664.38	5118.01
ENSG00000028277	4.56326e-05	0.000753582	0.731261	-1.3675	272.129	372.137
ENSG00000186468	4.74749e-05	0.000779602	1.09608	1.09608	5641.78	5147.24
ENSG00000179218	1.88956e-05	0.000330729	0.646448	-1.54691	145.851	225.619
ENSG00000004534	5.91732e-05	0.000960908	0.646233	-1.54743	117.973	182.555
ENSG00000071082	6.87747e-05	0.00111065	1.11047	1.11047	4002.13	3603.99
ENSG00000079950	8.42189e-05	0.00135259	0.724979	-1.37935	230.628	318.117
ENSG00000147454	0.00164291	0.0183291	0.646228	-1.54744	100.567	155.621
ENSG00000172809	9.23369e-05	0.00146685	1.12558	1.12558	2334.53	2074.07
ENSG00000124172	9.44119e-05	0.00149073	1.18524	1.18524	1031.15	869.995
ENSG00000145416	9.48597e-05	0.00149073	1.3773	1.3773	276.327	200.63
ENSG00000168092	0.00767844	0.0688469	0.645903	-1.54822	93.5465	144.83
ENSG00000158710	9.90973e-05	0.00154075	0.739678	-1.35194	299.749	405.242
ENSG00000135074	0.00118854	0.0139522	0.64576	-1.54856	102.711	159.055
ENSG00000123144	0.000110702	0.00170306	1.33001	1.33001	301.009	226.321
ENSG00000145495	0.000663936	0.00851178	0.644867	-1.55071	103.006	159.733
ENSG00000277443	0.000125309	0.00189782	0.643402	-1.55424	121.176	188.336
ENSG00000197622	2.49465e-05	0.000423946	0.640527	-1.56121	126.214	197.046
ENSG00000162511	0.000133464	0.00201091	1.2455	1.2455	686.532	551.209
ENSG00000112335	0.000143069	0.00214456	1.28054	1.28054	424.953	331.855
ENSG00000113369	0.0148896	0.117311	0.640097	-1.56226	89.0879	139.179
ENSG00000104964	0.000171545	0.00254531	1.38999	1.38999	254.172	182.859
ENSG00000188846	0.000174239	0.00257223	1.1086	1.1086	2879.84	2597.73
ENSG00000229391	6.37259e-09	1.77401e-07	0.639664	-1.56332	193.786	302.95
ENSG00000204257	0.000214325	0.00313236	1.28063	1.28063	475.437	371.251
ENSG00000173915	0.000251314	0.00365468	0.742856	-1.34616	170.223	229.146
ENSG00000257621	8.48901e-06	0.000160086	0.638136	-1.56706	123.217	193.089
ENSG00000136527	0.000314736	0.00453189	0.734649	-1.36119	158.024	215.101
ENSG00000143420	0.000322362	0.00461895	0.73896	-1.35325	156.875	212.292
ENSG00000005483	0.000343985	0.00490472	0.746048	-1.3404	175.044	234.628
ENSG00000150593	2.25245e-06	4.54062e-05	0.63748	-1.56868	148.053	232.248
ENSG00000067225	0.000375416	0.00530116	0.73486	-1.3608	173.781	236.482
ENSG00000117523	0.000377386	0.00530336	0.744243	-1.34365	178.351	239.641
ENSG00000124831	0.000382752	0.00534271	0.748511	-1.33599	199.324	266.294
ENSG00000156482	0.000384346	0.00534271	1.09144	1.09144	4142.18	3795.14
ENSG00000152520	0.00394356	0.0396118	0.634985	-1.57484	94.1145	148.215
ENSG00000147274	0.000393556	0.00541647	0.732595	-1.36501	151.294	206.517
ENSG00000163131	0.0003947	0.00541647	0.765905	-1.30565	236.145	308.322
ENSG00000130741	1.32839e-07	3.0335e-06	0.632965	-1.57987	146.328	231.179
ENSG00000218596	0.0298719	0.19275	0.632506	-1.58101	82.4192	130.306
ENSG00000137154	0.000430714	0.00581292	1.07783	1.07783	7603.22	7054.2
ENSG00000232112	0.000431544	0.00581292	1.20425	1.20425	672.921	558.789
ENSG00000136104	0.000445273	0.00597033	0.74135	-1.34889	157.801	212.856
ENSG00000092010	0.000456473	0.00609256	0.801894	-1.24705	382.316	476.767
ENSG00000100316	0.000478548	0.00632954	1.07409	1.07409	6533.24	6082.59
ENSG00000156508	0.000478871	0.00632954	1.07814	1.07814	8802.94	8164.94
ENSG00000133789	0.000480725	0.00632954	0.737443	-1.35604	171.415	232.445
ENSG00000175130	0.000501452	0.00657284	0.714667	-1.39925	160.742	224.919
ENSG00000136888	0.000544998	0.00711173	1.24986	1.24986	443.952	355.202
ENSG00000087365	0.000566527	0.00735982	0.742397	-1.34699	148.008	199.365
ENSG00000086062	0.00258844	0.0272158	0.63233	-1.58145	98.2722	155.413
ENSG00000116489	5.49022e-10	1.72558e-08	0.632041	-1.58218	204.723	323.908
ENSG00000130066	6.74037e-09	1.85869e-07	0.628649	-1.59071	205.238	326.475
ENSG00000183172	3.97774e-10	1.3064e-08	0.625841	-1.59785	197.518	315.605
ENSG00000163682	0.000709533	0.00898142	1.09452	1.09452	3417.28	3122.17
ENSG00000062194	0.000709787	0.00898142	0.756766	-1.32141	162.37	214.558
ENSG00000099622	0.00071758	0.00904089	0.816341	-1.22498	389.471	477.093
ENSG00000231389	0.000734466	0.00921392	1.15134	1.15134	1577.1	1369.8
ENSG00000183741	0.00628272	0.0582996	0.621412	-1.60924	89.4328	143.919
ENSG00000042980	0.000755477	0.00939685	0.741601	-1.34843	172.612	232.755
ENSG00000178913	4.45244e-08	1.09365e-06	0.621277	-1.60959	147.887	238.037
ENSG00000111348	0.00081504	0.0100522	1.17935	1.17935	849.12	719.992
ENSG00000152795	3.20889e-12	1.26751e-10	0.620806	-1.61081	253.088	407.677
ENSG00000085224	0.000826471	0.0101078	0.746248	-1.34004	158.101	211.861
ENSG00000121966	8.75391e-14	4.1947e-12	0.620029	-1.61283	543.436	876.469
ENSG00000167004	0.000936347	0.0113566	0.738234	-1.35458	152.693	206.836
ENSG00000112308	1.81527e-06	3.73664e-05	0.619945	-1.61305	116.495	187.913
ENSG00000241343	4.36079e-29	5.10923e-27	0.618274	-1.6174	1280.68	2071.38
ENSG00000125944	0.000992953	0.0118951	0.746982	-1.33872	148.665	199.02
ENSG00000196531	0.0010822	0.0129113	0.889104	-1.12473	1257.87	1414.76
ENSG00000102096	0.000400143	0.00546551	0.616074	-1.62318	115.663	187.742
ENSG00000158711	0.00293494	0.0304214	0.614526	-1.62727	90.0941	146.608
ENSG00000122026	0.00117427	0.0138403	0.939616	-1.06426	10199.7	10855.1
ENSG00000224631	0.000800569	0.00991552	0.613911	-1.6289	96.6775	157.478
ENSG00000198763	0.00122253	0.0142939	1.12494	1.12494	1854.72	1648.72
ENSG00000125910	0.00129163	0.0150415	1.37933	1.37933	166.274	120.547
ENSG00000175482	6.7178e-06	0.000128341	0.609135	-1.64167	107.672	176.763
ENSG00000145779	0.0013229	0.015284	1.30646	1.30646	211.284	161.722
ENSG00000081665	0.00908588	0.0799941	0.607865	-1.6451	86.0111	141.497
ENSG00000132424	0.00135619	0.0155456	0.815439	-1.22633	363.576	445.866
ENSG00000069275	8.54745e-09	2.31335e-07	0.604782	-1.65349	153.502	253.814
ENSG00000198771	0.00139159	0.0158273	1.27937	1.27937	309.101	241.605
ENSG00000163584	0.00143902	0.0163033	0.748076	-1.33676	146.922	196.399
ENSG00000107223	0.0014478	0.0163394	1.25788	1.25788	324.959	258.338
ENSG00000110367	3.11243e-10	1.03382e-08	0.604396	-1.65455	175.556	290.466
ENSG00000010244	0.0014906	0.0166936	0.740223	-1.35094	136.718	184.699
ENSG00000253203	0.000289236	0.00418533	0.602484	-1.6598	96.5162	160.197
ENSG00000211592	0.00168869	0.0187683	1.33736	1.33736	11113.6	8310.07
ENSG00000149273	0.00169871	0.0188081	0.933878	-1.0708	4794.13	5133.58
ENSG00000087074	9.08561e-05	0.00145122	0.60082	-1.66439	104.647	174.174
ENSG00000140264	0.00224809	0.0247036	1.13877	1.13877	1032.91	907.039
ENSG00000196352	0.00225899	0.0247304	0.719558	-1.38974	119.21	165.671
ENSG00000171862	0.00110527	0.0131329	0.600011	-1.66664	91.9495	153.246
ENSG00000184203	0.00234517	0.025483	0.7423	-1.34717	128.447	173.04
ENSG00000234797	0.00250949	0.0265769	0.598937	-1.66962	88.8712	148.382
ENSG00000122566	0.00238242	0.0256613	0.841733	-1.18803	490.542	582.776
ENSG00000143727	0.00238792	0.0256613	0.728411	-1.37285	121.247	166.455
ENSG00000185088	0.00244525	0.0260968	0.766191	-1.30516	167.915	219.156
ENSG00000054118	0.0024463	0.0260968	0.776834	-1.28728	170.025	218.869
ENSG00000206503	0.00246425	0.0261928	1.12975	1.12975	1731.28	1532.45
ENSG00000114861	5.13425e-10	1.63124e-08	0.597427	-1.67384	219.802	367.913
ENSG00000133872	0.00253938	0.0267965	1.25445	1.25445	295.538	235.592
ENSG00000124193	1.8853e-05	0.000330729	0.595773	-1.67849	105.074	176.365
ENSG00000115541	0.00265933	0.027861	0.775713	-1.28914	161.88	208.686
ENSG00000067066	0.00272263	0.0284223	0.791333	-1.26369	217.123	274.377
ENSG00000212907	0.00279707	0.0290955	0.724559	-1.38015	120.515	166.328
ENSG00000110848	0.000824767	0.0101078	0.594579	-1.68186	98.4258	165.539
ENSG00000138071	0.00294939	0.0304631	0.774384	-1.29135	163.23	210.787
ENSG00000241553	0.00317247	0.0326518	0.769735	-1.29915	153.335	199.206
ENSG00000167552	0.00323923	0.033222	0.731852	-1.3664	125.255	171.148
ENSG00000163221	0.0427319	0.242535	0.592225	-1.68855	76.8978	129.846
ENSG00000180448	0.00347397	0.0353812	0.714509	-1.39956	118.519	165.874
ENSG00000026508	0.00352913	0.0358183	0.762525	-1.31143	143.247	187.859
ENSG00000088986	0.003688	0.0372982	1.30215	1.30215	227.821	174.957
ENSG00000111640	0.00370047	0.0372982	0.817516	-1.22322	553.627	677.206
ENSG00000197061	5.24693e-09	1.47469e-07	0.591793	-1.68978	244.697	413.484
ENSG00000131174	0.00404369	0.0403636	0.780453	-1.28131	162.72	208.494
ENSG00000119866	4.02105e-09	1.14112e-07	0.591362	-1.69101	159.576	269.845
ENSG00000104894	0.00412745	0.0410358	1.13193	1.13193	1687.99	1491.25
ENSG00000117091	0.00436345	0.0432352	1.25678	1.25678	253.393	201.621
ENSG00000125347	0.0043938	0.0433888	0.755806	-1.32309	156.735	207.375
ENSG00000204387	0.00449439	0.0442326	1.23949	1.23949	314.945	254.093
ENSG00000092841	0.00482127	0.0472905	1.16772	1.16772	675.773	578.71
ENSG00000114391	0.00491802	0.0480782	1.09787	1.09787	1623.22	1478.52
ENSG00000139218	0.00502083	0.0489196	0.795739	-1.25669	187.109	235.139
ENSG00000111669	0.00508972	0.0494261	0.795564	-1.25697	223.083	280.409
ENSG00000255302	0.0051546	0.0498904	0.786992	-1.27066	167.068	212.287
ENSG00000026025	0.00525692	0.0505918	0.789536	-1.26657	316.628	401.031
ENSG00000204287	0.00526169	0.0505918	1.0948	1.0948	5228.06	4775.36
ENSG00000213654	0.00537224	0.0514854	1.21964	1.21964	335.27	274.892
ENSG00000084207	2.36845e-09	6.99292e-08	0.590852	-1.69247	165.481	280.071
ENSG00000074800	0.00552315	0.0525868	0.799954	-1.25007	225.894	282.384
ENSG00000140968	6.21408e-11	2.27047e-09	0.588282	-1.69987	194.913	331.326
ENSG00000237550	0.00564012	0.053353	0.757544	-1.32005	128.163	169.182
ENSG00000089063	0.0059526	0.0558894	0.768515	-1.30121	132.007	171.769
ENSG00000069493	0.00595528	0.0558894	1.301	1.301	221.367	170.152
ENSG00000265681	7.83233e-46	3.81565e-43	0.584958	-1.70952	1360.46	2325.74
ENSG00000178741	0.00602942	0.0563067	0.758209	-1.3189	135.586	178.824
ENSG00000153113	0.00626825	0.0582996	0.787128	-1.27044	171.332	217.667
ENSG00000164548	9.93836e-07	2.13602e-05	0.584037	-1.71222	111.425	190.785
ENSG00000167283	0.00645882	0.0597441	1.16044	1.16044	642.966	554.073
ENSG00000198668	0.0066333	0.0610609	0.823909	-1.21373	351.608	426.756
ENSG00000205544	0.00664295	0.0610609	0.734623	-1.36124	116.313	158.33
ENSG00000171223	1.03226e-10	3.63531e-09	0.579347	-1.72608	217.545	375.5
ENSG00000164985	0.00690792	0.0630995	0.774706	-1.29081	136.948	176.774
ENSG00000101017	0.00717225	0.0653099	0.760791	-1.31442	131.445	172.774
ENSG00000140575	0.00723747	0.0656991	0.734454	-1.36156	116.258	158.291
ENSG00000198586	8.08689e-08	1.95355e-06	0.572843	-1.74568	111.359	194.398
ENSG00000133112	0.00740029	0.0665983	0.925861	-1.08008	2132.54	2303.3
ENSG00000112343	0.00740487	0.0665983	0.781672	-1.27931	153.611	196.516
ENSG00000242086	1.34252e-06	2.84362e-05	0.551702	-1.81257	102.583	185.939
ENSG00000165502	0.00781661	0.0698714	1.16592	1.16592	522.248	447.929
ENSG00000136490	0.00795352	0.0708785	1.16848	1.16848	557.466	477.086
ENSG00000178127	0.00840349	0.0746608	0.731208	-1.3676	111.617	152.648
ENSG00000165119	0.0090414	0.0799941	0.842735	-1.18661	323.914	384.361
ENSG00000124795	0.00908161	0.0799941	0.754491	-1.3254	150.117	198.964
ENSG00000150867	2.58185e-06	5.06492e-05	0.551016	-1.81483	99.9824	181.451
ENSG00000135968	0.00917131	0.080398	0.765156	-1.30692	128.923	168.492
ENSG00000229833	0.00920029	0.080398	0.775705	-1.28915	131.816	169.93
ENSG00000163479	0.00921428	0.080398	1.21677	1.21677	296.559	243.727
ENSG00000174718	0.00951321	0.0826195	0.727167	-1.3752	112.347	154.5
ENSG00000137818	0.00952541	0.0826195	1.05495	1.05495	9235.19	8754.14
ENSG00000150459	0.00961102	0.0831154	0.814816	-1.22727	182.979	224.565
ENSG00000049618	0.00967488	0.0834209	0.774677	-1.29086	139.083	179.537
ENSG00000163364	0.000109238	0.00168943	0.550614	-1.81615	88.9487	161.544
ENSG00000139343	0.0101537	0.0870359	0.776125	-1.28845	134.847	173.744
ENSG00000273338	0.00343303	0.0350865	0.544657	-1.83602	83.1039	152.58
ENSG00000167815	0.0103743	0.0884081	0.765949	-1.30557	127.2	166.068
ENSG00000185905	2.48861e-06	4.91501e-05	0.543381	-1.84033	109.707	201.897
ENSG00000143924	0.0105551	0.089428	0.726876	-1.37575	109.271	150.33
ENSG00000173812	0.01063	0.0898018	0.915156	-1.09271	1322.27	1444.86
ENSG00000179262	0.0106642	0.0898313	0.789518	-1.2666	139.541	176.742
ENSG00000130770	0.0108247	0.0909213	0.802398	-1.24626	159.371	198.619
ENSG00000091490	0.0108578	0.0909377	0.751299	-1.33103	123.101	163.851
ENSG00000204592	0.0111209	0.0928758	1.11677	1.11677	992.952	889.129
ENSG00000165732	0.0113021	0.09412	0.741091	-1.34936	115.117	155.335
ENSG00000136156	0.0114344	0.0948532	1.20424	1.20424	326.014	270.722
ENSG00000170776	0.0114551	0.0948532	0.786061	-1.27217	147.052	187.075
ENSG00000167863	0.0120892	0.0996529	0.778295	-1.28486	130.562	167.754
ENSG00000131401	0.0121248	0.0996529	0.810909	-1.23318	202.567	249.803
ENSG00000143761	0.012137	0.0996529	0.808801	-1.2364	162.239	200.592
ENSG00000213676	0.012246	0.100266	0.778591	-1.28437	126.596	162.596
ENSG00000135535	0.0128192	0.104409	0.784664	-1.27443	131.313	167.349
ENSG00000143401	7.48563e-09	2.04491e-07	0.540112	-1.85147	113.462	210.071
ENSG00000269893	0.0128591	0.104409	0.812199	-1.23123	188.822	232.483
ENSG00000146192	0.0131477	0.106456	0.726742	-1.376	110.06	151.443
ENSG00000147123	0.0132977	0.107374	0.819789	-1.21983	197.466	240.875
ENSG00000196419	0.0133549	0.107538	0.800924	-1.24856	143.023	178.573
ENSG00000101608	0.013516	0.108536	1.13159	1.13159	794.692	702.278
ENSG00000189241	1.88305e-08	4.82821e-07	0.535436	-1.86764	109.39	204.301
ENSG00000142864	0.0140718	0.112382	0.822338	-1.21605	210.419	255.879
ENSG00000156136	0.0143535	0.11432	0.762696	-1.31114	118.686	155.613
ENSG00000156467	0.0144042	0.114412	0.862365	-1.1596	415.212	481.481
ENSG00000087460	0.0144825	0.114722	0.805525	-1.24143	156.631	194.446
ENSG00000144381	0.0145497	0.114943	0.772373	-1.29471	124.808	161.59
ENSG00000119335	1.83609e-25	1.73125e-23	0.510698	-1.95811	264.167	517.266
ENSG00000244509	1.25735e-12	5.40476e-11	0.50978	-1.96163	133.502	261.882
ENSG00000162980	0.0155377	0.121761	0.717725	-1.39329	101.269	141.097
ENSG00000116473	0.0157789	0.12332	0.792917	-1.26117	127.155	160.364
ENSG00000132507	2.27464e-12	9.23439e-11	0.507339	-1.97107	132.519	261.204
ENSG00000115935	0.0160477	0.124754	0.734122	-1.36217	109.521	149.186
ENSG00000184640	0.0162372	0.125892	0.778298	-1.28485	124.035	159.367
ENSG00000160991	0.0164099	0.126895	0.796968	-1.25476	163.138	204.699
ENSG00000198408	0.0170876	0.131786	0.796147	-1.25605	134.916	169.462
ENSG00000108424	0.0171672	0.132052	0.755243	-1.32408	117.436	155.494
ENSG00000100354	7.8605e-18	5.10583e-16	0.501141	-1.99545	174.968	349.139
ENSG00000127540	0.0172752	0.132187	1.18513	1.18513	318.879	269.066
ENSG00000163320	0.0180523	0.137731	0.727379	-1.3748	106.392	146.268
ENSG00000114857	0.018094	0.137731	0.78832	-1.26852	132.748	168.394
ENSG00000272211	1.11559e-06	2.3802e-05	0.495499	-2.01817	92.696	187.076
ENSG00000270647	0.0183905	0.139262	0.73478	-1.36095	105.464	143.531
ENSG00000161970	0.0188066	0.142046	0.947521	-1.05539	4603.75	4858.73
ENSG00000129351	0.0191052	0.143929	0.720599	-1.38773	102.153	141.761
ENSG00000069329	0.0191684	0.144034	0.752576	-1.32877	111.368	147.982
ENSG00000138385	0.0195456	0.146492	0.795565	-1.25697	133.682	168.034
ENSG00000138814	1.12863e-12	4.92387e-11	0.490442	-2.03898	118.386	241.386
ENSG00000127914	0.0198259	0.147835	0.803715	-1.24422	151.85	188.936
ENSG00000232573	3.89894e-09	1.11731e-07	0.478495	-2.08989	95.0288	198.599
ENSG00000178982	0.0202309	0.149748	1.16854	1.16854	373.073	319.264
ENSG00000081320	1.56254e-21	1.30494e-19	0.466263	-2.14471	147.671	316.712
ENSG00000124942	0.0203492	0.150204	0.727868	-1.37387	115.268	158.364
ENSG00000196776	0.0206721	0.152203	0.821146	-1.21781	161.675	196.889
ENSG00000067167	0.0207459	0.152362	0.77414	-1.29176	121.671	157.169
ENSG00000068831	0.0213195	0.156183	1.23862	1.23862	180.912	146.06
ENSG00000145734	0.0217207	0.158724	0.738625	-1.35387	110.03	148.966
ENSG00000188529	0.0217832	0.158784	0.773639	-1.29259	122.237	158.002
ENSG00000147010	0.0219301	0.158917	0.719144	-1.39054	104.418	145.197
ENSG00000161405	0.0219632	0.158917	0.813371	-1.22945	165.804	203.848
ENSG00000126267	0.0220239	0.158917	1.17531	1.17531	341.178	290.289
ENSG00000112799	0.0220645	0.158917	1.21907	1.21907	232.984	191.116
ENSG00000167088	0.0220733	0.158917	0.7844	-1.27486	124.026	158.116
ENSG00000162894	0.0221287	0.158924	1.20585	1.20585	261.759	217.074
ENSG00000213639	2.30948e-16	1.37768e-14	0.462309	-2.16306	115.076	248.915
ENSG00000170296	1.16393e-15	6.67093e-14	0.454306	-2.20116	108.221	238.211
ENSG00000244879	0.0228353	0.162799	0.805771	-1.24105	199.814	247.979
ENSG00000119707	0.0231327	0.164131	0.813868	-1.2287	153.615	188.747
ENSG00000117592	0.0231345	0.164131	0.758156	-1.31899	111.325	146.837
ENSG00000127184	0.0233775	0.165454	1.11149	1.11149	811.361	729.979
ENSG00000116161	0.0235164	0.166035	0.76067	-1.31463	113.2	148.817
ENSG00000075785	0.0238176	0.167756	0.776978	-1.28704	117.621	151.383
ENSG00000168610	0.0239989	0.168449	0.725591	-1.37819	102.16	140.796
ENSG00000152804	0.0240312	0.168449	1.25481	1.25481	156.543	124.755
ENSG00000110777	0.0241273	0.168607	0.749276	-1.33462	111.726	149.112
ENSG00000163660	0.0241691	0.168607	0.801912	-1.24702	136.09	169.707
ENSG00000269404	0.0242523	0.168785	0.813805	-1.2288	173.859	213.637
ENSG00000240972	0.0244566	0.169802	0.871695	-1.14719	403.991	463.454
ENSG00000114978	0.0245596	0.169986	0.812393	-1.23093	145.237	178.777
ENSG00000172590	0.0246497	0.169986	0.795055	-1.25777	126.116	158.626
ENSG00000070831	1.75404e-43	7.32437e-41	0.450518	-2.21967	321.291	713.159
ENSG00000126457	0.024778	0.170414	0.796837	-1.25496	130.008	163.155
ENSG00000126524	0.0249959	0.171152	0.785186	-1.27358	122.98	156.625
ENSG00000127314	0.0250024	0.171152	0.782818	-1.27744	125.439	160.241
ENSG00000102007	0.0252069	0.17203	0.827034	-1.20914	201.187	243.263
ENSG00000167460	0.0252484	0.17203	0.732361	-1.36545	109.376	149.347
ENSG00000196683	0.0253626	0.172407	1.11576	1.11576	781.187	700.137
ENSG00000149925	0.0254631	0.17257	0.857351	-1.16638	306.857	357.913
ENSG00000239713	0.0255047	0.17257	0.769345	-1.29981	116.657	151.631
ENSG00000136003	0.025693	0.173443	1.18421	1.18421	287.366	242.664
ENSG00000100911	0.0261764	0.176299	0.81382	-1.22877	187.606	230.525
ENSG00000165637	0.026401	0.177403	0.785349	-1.27332	122.467	155.94
ENSG00000110321	0.0265508	0.178	0.832941	-1.20057	191.365	229.746
ENSG00000051108	0.0268199	0.179393	0.826311	-1.2102	213.7	258.619
ENSG00000182944	0.0269372	0.179766	0.780873	-1.28062	123.704	158.417
ENSG00000160932	0.028244	0.188058	1.2122	1.2122	227.547	187.713
ENSG00000135624	0.028386	0.188574	0.781691	-1.27928	116.572	149.128
ENSG00000163041	0.0287908	0.189071	1.09557	1.09557	1006.72	918.903
ENSG00000204256	0.0287928	0.189071	0.742207	-1.34733	105.317	141.897
ENSG00000198399	0.0288269	0.189071	0.791597	-1.26327	127.335	160.858
ENSG00000143443	1.96706e-14	1.01233e-12	0.443095	-2.25685	124.79	281.633
ENSG00000145782	0.0288469	0.189071	0.761802	-1.31268	111.374	146.198
ENSG00000254087	0.0288491	0.189071	0.784448	-1.27478	120.441	153.536
ENSG00000150093	0.0291613	0.18994	1.33496	1.33496	206.868	154.962
ENSG00000165525	0.0291806	0.18994	0.761144	-1.31381	110.938	145.752
ENSG00000211677	3.75337e-09	1.08625e-07	0.434922	-2.29926	2932.19	6741.89
ENSG00000146457	0.0292415	0.18994	0.780889	-1.28059	116.28	148.907
ENSG00000078674	0.0293107	0.189967	0.791442	-1.26352	122.638	154.956
ENSG00000170006	0.0297447	0.192353	0.826867	-1.20939	169.934	205.516
ENSG00000245532	2.57847e-20	1.98339e-18	0.432445	-2.31243	224.652	519.493
ENSG00000226084	3.79052e-41	1.00724e-38	0.418067	-2.39196	239.633	573.192
ENSG00000110958	0.0303619	0.193984	0.837323	-1.19428	184.306	220.113
ENSG00000100138	0.0303739	0.193984	0.843426	-1.18564	194.272	230.337
ENSG00000105701	0.0303926	0.193984	0.820125	-1.21933	144.049	175.643
ENSG00000100941	0.030395	0.193984	0.819335	-1.2205	144.307	176.127
ENSG00000110700	0.0306899	0.195439	1.05152	1.05152	4239.31	4031.59
ENSG00000166946	0.0309914	0.19693	0.813754	-1.22887	136.262	167.448
ENSG00000129534	0.0316206	0.200492	0.782807	-1.27745	124.038	158.453
ENSG00000106682	0.031872	0.201421	0.766212	-1.30512	110.919	144.763
ENSG00000126067	0.0319049	0.201421	0.740857	-1.34979	107.536	145.151
ENSG00000119820	0.0321807	0.202724	0.76312	-1.31041	114.22	149.675
ENSG00000181722	0.0322509	0.20273	0.740893	-1.34972	105.041	141.776
ENSG00000168028	0.0323386	0.202845	1.06459	1.06459	2528.55	2375.14
ENSG00000182670	0.032555	0.203765	0.793408	-1.26039	125.629	158.34
ENSG00000157514	3.41407e-50	2.49483e-47	0.395859	-2.52615	335.125	846.577
ENSG00000135899	0.0327233	0.203945	0.847153	-1.18042	233.851	276.043
ENSG00000067900	0.0332245	0.206628	0.775878	-1.28886	115.564	148.947
ENSG00000237541	1.55061e-23	1.41639e-21	0.382705	-2.61298	122.369	319.746
ENSG00000169045	4.36985e-29	5.10923e-27	0.378155	-2.64442	155.077	410.089
ENSG00000116539	0.0339906	0.20964	0.792387	-1.26201	122.6	154.723
ENSG00000046651	0.0339956	0.20964	0.759414	-1.31681	107.738	141.869
ENSG00000003402	0.0347632	0.213921	0.758914	-1.31767	114.286	150.592
ENSG00000104064	0.0348774	0.214173	0.801314	-1.24795	131.057	163.552
ENSG00000115524	0.0353195	0.216109	0.810201	-1.23426	134.909	166.513
ENSG00000109920	0.0353404	0.216109	0.773753	-1.2924	114.133	147.505
ENSG00000159958	3.81936e-42	1.1164e-39	0.372234	-2.68648	181.099	486.52
ENSG00000065413	0.0356223	0.216925	0.793515	-1.26022	127.027	160.082
ENSG00000232388	0.0357589	0.217304	0.812358	-1.23098	134.469	165.529
ENSG00000179091	0.0360661	0.218716	0.771787	-1.29569	112.759	146.101
ENSG00000164327	0.0363875	0.220209	0.72503	-1.37925	99.9827	137.902
ENSG00000160310	0.0365515	0.220659	0.782033	-1.27872	116.374	148.81
ENSG00000100300	0.0366131	0.220659	0.803465	-1.24461	129.885	161.656
ENSG00000106588	0.0366884	0.220659	0.83363	-1.19957	168.095	201.642
ENSG00000145741	0.0376198	0.225796	0.917466	-1.08996	870.847	949.188
ENSG00000160888	0.038231	0.228994	0.829073	-1.20617	163.667	197.409
ENSG00000198898	0.0383833	0.229436	0.793143	-1.26081	116.599	147.009
ENSG00000271204	0.0385072	0.229707	0.716049	-1.39655	95.6793	133.621
ENSG00000198961	0.0387283	0.230556	0.724484	-1.38029	97.2	134.164
ENSG00000149806	0.0390092	0.231184	1.05368	1.05368	3158.59	2997.67
ENSG00000196154	0.0390665	0.231184	0.804487	-1.24303	427.743	531.696
ENSG00000143222	0.0390712	0.231184	0.8152	-1.22669	132.741	162.833
ENSG00000115464	0.0392182	0.231585	0.728077	-1.37348	99.6294	136.839
ENSG00000185201	0.0394227	0.232317	0.847977	-1.17928	271.308	319.947
ENSG00000106948	0.0395433	0.232317	0.753312	-1.32747	106.344	141.168
ENSG00000140740	0.0396212	0.232317	0.792356	-1.26206	119.622	150.97
ENSG00000127022	0.0396601	0.232317	0.732481	-1.36522	100.817	137.638
ENSG00000112739	0.0397756	0.232343	0.75273	-1.3285	105.983	140.798
ENSG00000124783	0.03983	0.232343	0.770835	-1.29729	111.607	144.787
ENSG00000198625	1.46567e-28	1.64775e-26	0.361005	-2.77005	142.605	395.023
ENSG00000103187	0.040001	0.232451	0.840813	-1.18932	246.596	293.283
ENSG00000137309	0.0405153	0.234691	0.745341	-1.34167	105.333	141.321
ENSG00000067064	0.0406076	0.234691	0.738217	-1.35462	101.886	138.016
ENSG00000205352	0.0406274	0.234691	1.17492	1.17492	231.788	197.279
ENSG00000150753	0.0410197	0.23649	0.785235	-1.2735	113.138	144.081
ENSG00000174021	0.0412695	0.237462	0.828329	-1.20725	146.568	176.945
ENSG00000108848	0.0413912	0.237694	0.834824	-1.19786	162.278	194.386
ENSG00000165629	0.0418647	0.239485	0.807551	-1.23831	129.747	160.667
ENSG00000127922	0.0418668	0.239485	0.809402	-1.23548	131.392	162.332
ENSG00000177606	1.22311e-26	1.27684e-24	0.332693	-3.00578	135.939	408.602
ENSG00000105323	0.0425408	0.241934	0.754623	-1.32517	106.036	140.515
ENSG00000123600	0.0425433	0.241934	0.765139	-1.30695	111.718	146.009
ENSG00000254772	4.63644e-43	1.69404e-40	0.331074	-3.02047	119.525	361.021
ENSG00000088832	0.0428336	0.242641	0.827789	-1.20804	143.621	173.5
ENSG00000095059	0.0429345	0.242742	0.754469	-1.32544	104.406	138.383
ENSG00000174123	0.0432396	0.243925	0.760459	-1.31499	109.087	143.449
ENSG00000120129	4.21478e-32	6.4841e-30	0.280633	-3.56337	102.899	366.668
ENSG00000177410	0.043394	0.243925	1.1516	1.1516	380.24	330.185
ENSG00000170759	0.0436369	0.244819	0.744864	-1.34253	101.205	135.87
ENSG00000102879	0.0441778	0.247379	1.10783	1.10783	772.983	697.744
ENSG00000138279	0.0443947	0.248118	0.790234	-1.26545	114.167	144.472
ENSG00000137210	0.0445009	0.248237	0.801444	-1.24775	121.034	151.019
ENSG00000185896	0.0448456	0.249683	0.760635	-1.31469	108.403	142.517
ENSG00000135404	0.0454444	0.252536	0.782493	-1.27797	118.525	151.471
ENSG00000163220	1.67032e-23	1.4795e-21	0.277648	-3.60168	84.9662	306.021
ENSG00000164924	0.0457511	0.252842	0.866507	-1.15406	281.542	324.917
ENSG00000159199	0.0458542	0.252842	0.815037	-1.22694	128.796	158.024
ENSG00000143870	0.0459197	0.252842	0.807928	-1.23773	135.372	167.555
ENSG00000067082	3.72412e-69	4.30892e-66	0.231786	-4.31433	124.693	537.965
ENSG00000234545	0.0465347	0.255624	0.786644	-1.27122	114.773	145.902
ENSG00000147996	0.0466122	0.255624	0.759863	-1.31603	106.542	140.212
ENSG00000143546	4.42243e-69	4.30892e-66	0.123358	-8.10649	81.9795	664.566
ENSG00000164615	0.0469797	0.256328	0.786243	-1.27187	111.979	142.423
ENSG00000081154	0.0470036	0.256328	0.834089	-1.19891	139.04	166.697
ENSG00000079246	0.0471076	0.256416	0.827784	-1.20804	149.419	180.505
ENSG00000163468	0.0474382	0.257736	0.820605	-1.21861	133.069	162.16
ENSG00000102144	0.0475271	0.25774	0.846261	-1.18167	171.53	202.692
ENSG00000188994	0.0476772	0.257986	0.749111	-1.33491	103.603	138.301
ENSG00000136810	0.047749	0.257986	0.791344	-1.26367	129.804	164.03
ENSG00000012779	0.0486065	0.262134	0.750749	-1.332	103.936	138.442
ENSG00000175463	0.0492864	0.265311	1.19357	1.19357	190.801	159.858
ENSG00000162704	0.0502498	0.27	1.16697	1.16697	249.745	214.012
ENSG00000082512	0.050822	0.272574	0.782014	-1.27875	113.783	145.5
ENSG00000278311	0.0510382	0.273232	0.810147	-1.23434	121.153	149.544
ENSG00000168300	0.0513163	0.274218	0.781884	-1.27896	110.481	141.301
ENSG00000115825	0.0515316	0.2744	0.711626	-1.40523	93.4192	131.276
ENSG00000161654	0.0515381	0.2744	0.705015	-1.41841	91.4346	129.692
ENSG00000273221	0.0518587	?	0.64037	-1.5616	79.9048	124.779
ENSG00000147140	0.0521046	0.276912	0.779682	-1.28257	111.846	143.45
ENSG00000240065	0.0527938	0.280066	1.15384	1.15384	302.191	261.9
ENSG00000182004	0.0537496	0.284136	0.837292	-1.19433	152.447	182.072
ENSG00000105404	0.053799	0.284136	1.1885	1.1885	179.035	150.639
ENSG00000114439	0.0539373	0.284136	0.821371	-1.21748	131.722	160.368
ENSG00000185885	0.0539499	0.284136	0.803458	-1.24462	155.274	193.257
ENSG00000105939	0.0549496	0.288502	0.765861	-1.30572	105.517	137.776
ENSG00000117450	0.0549762	0.288502	0.832151	-1.2017	146.146	175.625
ENSG00000103365	0.0551372	0.288828	0.757702	-1.31978	105.288	138.957
ENSG00000072274	0.0551886	?	0.66477	-1.50428	85.0381	127.921
ENSG00000099901	0.055496	0.290188	0.818972	-1.22104	134.037	163.665
ENSG00000143614	0.0556233	0.290334	0.685514	-1.45876	87.2622	127.295
ENSG00000173821	0.0558146	0.290813	0.805754	-1.24107	127.185	157.846
ENSG00000069966	0.0561014	0.291787	0.741192	-1.34918	99.1527	133.775
ENSG00000095585	0.0563962	0.292245	0.827644	-1.20825	135.221	163.38
ENSG00000178035	0.0564409	0.292245	0.788574	-1.26811	114.597	145.322
ENSG00000163568	0.0564895	0.292245	0.74659	-1.33942	106.733	142.96
ENSG00000168066	0.056826	0.293467	1.15363	1.15363	268.111	232.407
ENSG00000162961	0.0569639	0.293661	0.778659	-1.28426	108.102	138.831
ENSG00000173660	0.057977	0.298079	1.13497	1.13497	391.359	344.819
ENSG00000130592	0.0580853	0.298079	1.1457	1.1457	331.819	289.622
ENSG00000198740	0.0581596	0.298079	0.703913	-1.42063	91	129.277
ENSG00000100567	0.0582289	0.298079	0.765278	-1.30671	104.953	137.143
ENSG00000227615	0.0587423	0.300026	0.737304	-1.35629	97.1406	131.751
ENSG00000118705	0.0588144	0.300026	0.774954	-1.2904	114.53	147.789
ENSG00000167604	0.0591682	0.300472	0.707909	-1.41261	92.0016	129.962
ENSG00000175390	0.0591718	0.300472	1.12539	1.12539	415.866	369.531
ENSG00000075292	0.0592104	0.300472	0.748982	-1.33515	100.49	134.169
ENSG00000176978	0.0596075	0.301963	0.791912	-1.26277	113.119	142.843
ENSG00000127483	0.0600472	0.303511	0.815405	-1.22638	131.481	161.247
ENSG00000078808	0.0601208	0.303511	0.763864	-1.30913	102.767	134.536
ENSG00000143436	0.0604537	0.304666	0.756665	-1.32159	99.8734	131.992
ENSG00000147548	0.0617022	0.309632	0.839929	-1.19058	141.377	168.32
ENSG00000178927	0.061752	0.309632	0.780695	-1.28091	109.448	140.193
ENSG00000103653	0.0617569	0.309632	0.834958	-1.19767	138.474	165.845
ENSG00000269858	0.0620279	0.310288	0.778439	-1.28462	107.307	137.849
ENSG00000147065	0.0622348	0.310288	0.823643	-1.21412	131.152	159.234
ENSG00000104765	0.0622601	0.310288	0.732464	-1.36525	94.5018	129.019
ENSG00000186812	0.0623797	0.310288	0.748889	-1.33531	99.6845	133.11
ENSG00000198604	0.0624186	0.310288	0.777695	-1.28585	110.258	141.776
ENSG00000168421	0.0630125	0.312709	0.831544	-1.20258	142.138	170.933
ENSG00000177455	0.063315	0.313186	0.817381	-1.22342	126.725	155.037
ENSG00000169021	0.0633228	0.313186	0.810028	-1.23453	120.116	148.286
ENSG00000138326	0.0634512	0.31329	0.945102	-1.05809	2095.17	2216.87
ENSG00000136448	0.0643636	0.31654	0.732555	-1.36508	96.2243	131.354
ENSG00000124151	0.0643909	0.31654	0.787744	-1.26945	109.827	139.419
ENSG00000183011	0.0644341	0.31654	0.813278	-1.22959	121.406	149.28
ENSG00000281649	0.0654626	0.321052	0.800766	-1.2488	115.463	144.191
ENSG00000168175	0.066095	0.323402	0.772226	-1.29496	103.772	134.38
ENSG00000135940	0.066163	0.323402	1.14334	1.14334	286.479	250.563
ENSG00000120992	0.0663909	0.323974	0.771479	-1.29621	104.856	135.916
ENSG00000197747	0.0672901	0.327815	0.823533	-1.21428	211.784	257.166
ENSG00000186687	0.0683043	0.331869	0.693787	-1.44136	87.4661	126.071
ENSG00000005075	0.068458	0.331869	0.794047	-1.25937	113.338	142.735
ENSG00000145907	0.0684628	0.331869	0.759258	-1.31708	101.431	133.593
ENSG00000174720	0.0687338	0.332631	0.751713	-1.3303	99.1979	131.962
ENSG00000100243	0.0691372	0.33403	0.736116	-1.35848	95.7098	130.02
ENSG00000111913	0.0692778	0.334157	1.14169	1.14169	339.968	297.775
ENSG00000168385	0.0695191	0.334768	0.756157	-1.32248	100.409	132.788
ENSG00000100836	0.0697164	0.335166	0.78734	-1.2701	109.21	138.708
ENSG00000111880	0.0702942	0.337221	0.704551	-1.41934	91.9619	130.526
ENSG00000230590	0.0703827	0.337221	0.747757	-1.33733	98.6016	131.863
ENSG00000163714	0.0705722	0.337221	0.814477	-1.22778	118.425	145.4
ENSG00000151461	0.0706054	0.337221	0.839068	-1.1918	134.633	160.455
ENSG00000264772	0.0709425	0.33822	0.693549	-1.44186	86.6989	125.008
ENSG00000119231	0.0710459	0.33822	0.695077	-1.43869	86.9737	125.128
ENSG00000128609	0.0714711	0.339691	0.813155	-1.22978	118.563	145.807
ENSG00000082212	0.0716081	0.33979	0.707103	-1.41422	89.5381	126.627
ENSG00000105639	0.0716952	?	0.679009	-1.47274	83.685	123.246
ENSG00000115875	0.0718576	0.340096	0.861812	-1.16035	190.124	220.61
ENSG00000182196	0.0719053	0.340096	0.856337	-1.16776	168.72	197.025
ENSG00000151694	0.0722834	0.341332	0.69788	-1.43291	87.7667	125.762
ENSG00000100345	0.0724266	0.341456	0.772685	-1.29419	106.35	137.637
ENSG00000138757	0.0726341	0.341883	0.754979	-1.32454	100.101	132.588
ENSG00000275302	0.0727803	0.34202	0.63117	-1.58436	87.4303	138.521
ENSG00000026297	0.0730646	0.34242	1.13918	1.13918	305.657	268.314
ENSG00000170248	0.0732026	0.34242	0.720839	-1.38727	92.3992	128.183
ENSG00000233927	0.0733143	0.34242	1.03867	1.03867	6465.3	6224.61
ENSG00000225921	0.0733418	0.34242	0.823514	-1.21431	122.451	148.693
ENSG00000128534	0.0734511	0.34242	0.837499	-1.19403	134.453	160.541
ENSG00000187735	0.0736664	0.342877	0.862796	-1.15902	204.212	236.686
ENSG00000213626	0.0742516	0.345051	0.847876	-1.17942	156.492	184.569
ENSG00000131469	0.0744867	0.345595	1.05003	1.05003	2522.19	2402.01
ENSG00000177156	0.075143	0.347092	0.8249	-1.21227	128.715	156.037
ENSG00000173726	0.075236	0.347092	0.813874	-1.22869	119.382	146.683
ENSG00000113558	0.0753658	0.347092	0.892323	-1.12067	337.804	378.567
ENSG00000145287	0.0754001	0.347092	0.881251	-1.13475	348.506	395.468
ENSG00000130348	0.0754032	0.347092	1.194	1.194	164.809	138.031
ENSG00000136450	0.0760707	0.349275	0.762268	-1.31187	100.63	132.013
ENSG00000106028	0.076227	0.349275	0.847548	-1.17987	144.964	171.04
ENSG00000120675	0.0762358	0.349275	0.796408	-1.25564	111.018	139.398
ENSG00000172785	0.0765237	0.349683	0.728444	-1.37279	92.9691	127.627
ENSG00000092148	0.0766636	0.349683	0.747081	-1.33854	97.182	130.082
ENSG00000102786	0.0766838	0.349683	0.703639	-1.42118	87.9256	124.958
ENSG00000160410	0.0770016	0.350585	0.802804	-1.24563	111.19	138.501
ENSG00000141682	0.0771656	0.350785	0.714966	-1.39867	91.295	127.691
ENSG00000065548	0.0773371	0.351019	0.812909	-1.23015	117.758	144.86
ENSG00000125676	0.0775772	0.351069	0.786468	-1.27151	108.637	138.132
ENSG00000229117	0.0775882	0.351069	1.0367	1.0367	12815.7	12362
ENSG00000103811	0.0777658	0.351329	0.837119	-1.19457	143.361	171.255
ENSG00000153310	0.0780441	0.351733	1.17159	1.17159	178.68	152.511
ENSG00000102910	0.078096	0.351733	0.762009	-1.31232	99.5417	130.631
ENSG00000171490	0.0786542	0.353702	0.863755	-1.15774	191.869	222.134
ENSG00000138095	0.0790949	0.355137	0.706383	-1.41566	87.8452	124.359
ENSG00000135655	0.0794923	0.356374	0.807781	-1.23796	115.235	142.657
ENSG00000100906	0.0799297	0.357786	0.853477	-1.17168	173.927	203.787
ENSG00000143799	0.0801792	0.358355	1.14926	1.14926	231.502	201.435
ENSG00000215301	0.0803559	0.358596	0.789368	-1.26684	110.453	139.926
ENSG00000168209	0.0806601	0.359405	0.77561	-1.28931	107.191	138.202
ENSG00000154582	0.0809526	0.360159	0.808287	-1.23718	115.075	142.369
ENSG00000173674	0.0811194	0.360353	0.822318	-1.21607	122.554	149.035
ENSG00000128739	0.0812812	0.360524	0.842556	-1.18686	134.5	159.633
ENSG00000117505	0.0816937	0.361804	0.756209	-1.32239	98.2772	129.96
ENSG00000185834	0.082353	0.364172	0.722038	-1.38497	90.615	125.499
ENSG00000106211	0.0829399	0.365819	0.768872	-1.30061	102.938	133.882
ENSG00000226950	0.0829758	0.365819	0.807516	-1.23837	119.764	148.311
ENSG00000143384	0.0833141	0.366193	0.80146	-1.24772	110.489	137.86
ENSG00000101166	0.0836174	0.366193	0.734485	-1.3615	92.6329	126.12
ENSG00000270629	0.0836272	0.366193	0.72617	-1.37709	92.9206	127.96
ENSG00000115232	0.0836761	0.366193	0.7839	-1.27567	109.58	139.788
ENSG00000106244	0.0836868	0.366193	0.793277	-1.26059	107.28	135.237
ENSG00000105193	0.0839023	0.366518	1.04339	1.04339	3328.99	3190.56
ENSG00000173221	0.084012	0.366518	0.791578	-1.2633	112.165	141.699
ENSG00000120533	0.084187	0.366734	0.821525	-1.21725	119.144	145.028
ENSG00000108312	0.0843883	0.367064	0.76007	-1.31567	100.799	132.618
ENSG00000170345	0.0848508	?	0.666482	-1.50042	82.1071	123.195
ENSG00000174574	0.0864582	0.375509	0.733726	-1.36291	92.3984	125.93
ENSG00000065427	0.0868236	0.376536	0.783264	-1.27671	105.537	134.74
ENSG00000118363	0.0871489	0.377027	1.14277	1.14277	264.485	231.443
ENSG00000151923	0.087371	0.377027	0.763974	-1.30895	98.8581	129.4
ENSG00000169905	0.0875874	0.377027	0.714189	-1.40019	88.8124	124.354
ENSG00000196230	0.0876632	0.377027	0.841263	-1.18869	212.696	252.829
ENSG00000165264	0.0877784	0.377027	0.775298	-1.28983	102.515	132.227
ENSG00000062716	0.0878067	0.377027	0.704498	-1.41945	87.0339	123.54
ENSG00000137714	0.0878397	0.377027	0.751098	-1.33138	96.2768	128.181
ENSG00000129667	0.0883831	0.378123	0.771317	-1.29648	102.716	133.169
ENSG00000161547	0.0884814	0.378123	0.861096	-1.16131	157.547	182.961
ENSG00000234420	0.0886163	0.378123	0.711021	-1.40643	87.9598	123.709
ENSG00000245904	0.0886859	0.378123	0.780927	-1.28053	107.668	137.872
ENSG00000182162	0.0887557	0.378123	0.731451	-1.36714	92.2116	126.067
ENSG00000073849	0.0888713	0.378123	0.754914	-1.32465	96.9737	128.457
ENSG00000083799	0.0895673	0.379687	0.759745	-1.31623	98.6609	129.86
ENSG00000132274	0.0895763	0.379687	0.788636	-1.26801	107.504	136.317
ENSG00000265808	0.0897028	0.379687	0.728497	-1.37269	91.4639	125.552
ENSG00000101126	0.0897584	0.379687	0.698344	-1.43196	86.121	123.322
ENSG00000198015	0.0899686	0.380026	0.750732	-1.33203	95.4405	127.13
ENSG00000084623	0.0904393	0.381463	0.842562	-1.18686	135.237	160.507
ENSG00000113712	0.0910257	0.383384	0.785476	-1.27311	104.385	132.894
ENSG00000023734	0.0913536	0.384211	0.789282	-1.26697	105.344	133.468
ENSG00000144580	0.0919811	?	0.703347	-1.42177	85.7665	121.94
ENSG00000047849	0.0920117	0.386423	0.745428	-1.34151	95.646	128.31
ENSG00000104872	0.0923221	0.386918	0.771239	-1.29662	99.7601	129.35
ENSG00000120071	0.092451	0.386918	0.810909	-1.23318	114.445	141.132
ENSG00000174917	0.0927324	0.386918	0.834765	-1.19794	125.76	150.653
ENSG00000083642	0.0927682	0.386918	0.70417	-1.42011	86.3003	122.556
ENSG00000166295	0.0927915	0.386918	0.900945	-1.10995	367.254	407.632
ENSG00000173141	0.0931063	0.387199	0.820577	-1.21866	116.223	141.636
ENSG00000170089	0.0931237	0.387199	0.733803	-1.36276	92.0041	125.38
ENSG00000099783	0.0937027	0.388804	0.866355	-1.15426	177.562	204.952
ENSG00000113719	0.0939145	0.388804	0.769184	-1.30008	99.2006	128.969
ENSG00000134308	0.0940211	0.388804	0.83363	-1.19957	128.052	153.608
ENSG00000110955	0.0940447	0.388804	0.867674	-1.15251	187.379	215.955
ENSG00000114784	0.0942595	0.388804	0.854755	-1.16993	140.722	164.634
ENSG00000137970	0.0943078	0.388804	0.727686	-1.37422	90.3004	124.093
ENSG00000071127	0.0944666	0.38891	0.793582	-1.26011	108.665	136.929
ENSG00000116017	0.0948057	0.389217	0.739244	-1.35273	93.536	126.529
ENSG00000162604	0.0948075	0.389217	0.771513	-1.29615	100.207	129.883
ENSG00000100591	0.0962926	0.393632	0.78899	-1.26744	104.73	132.739
ENSG00000138495	0.0963187	0.393632	0.839941	-1.19056	130.461	155.321
ENSG00000145912	0.0963282	0.393632	0.832517	-1.20118	126.713	152.205
ENSG00000012660	0.0964215	0.393632	0.818501	-1.22175	115.83	141.515
ENSG00000175061	0.0970379	0.395242	0.919971	-1.08699	673.646	732.247
ENSG00000147457	0.0971145	0.395242	0.761663	-1.31292	98.0992	128.796
ENSG00000126353	0.0972217	0.395242	1.18558	1.18558	209.89	177.036
ENSG00000152404	0.0973933	0.39539	0.790326	-1.2653	107.017	135.408
ENSG00000116747	0.0977381	0.395654	0.756153	-1.32248	96.7727	127.98
ENSG00000038219	0.0977661	0.395654	0.75693	-1.32113	95.8885	126.681
ENSG00000035928	0.0981817	0.395654	0.75662	-1.32167	97.0236	128.233
ENSG00000105372	0.0982497	0.395654	0.965761	-1.03545	8086.59	8373.29
ENSG00000204475	0.0982655	0.395654	0.77774	-1.28578	103.075	132.531
ENSG00000108055	0.0982705	0.395654	0.792413	-1.26197	107.222	135.311
ENSG00000170515	0.0985442	0.39621	0.837582	-1.19391	135.004	161.183
ENSG00000197006	0.0989677	0.397121	0.792575	-1.26171	106.054	133.809
ENSG00000171606	0.0990425	0.397121	0.754101	-1.32608	95.988	127.288
ENSG00000134109	0.0995246	?	0.695657	-1.43749	84.0822	120.867
ENSG00000198911	0.0996868	?	0.680355	-1.46982	81.7357	120.137
ENSG00000196262	0.0998153	0.399672	0.919278	-1.08781	659.725	717.655
ENSG00000129003	0.0999841	0.399799	0.786333	-1.27173	103.151	131.18
ENSG00000154518	0.10022	0.400194	0.864269	-1.15705	169.523	196.146
ENSG00000089775	0.100607	?	0.705827	-1.41678	85.7361	121.469
ENSG00000186470	0.100908	0.402031	0.790677	-1.26474	107.06	135.403
ENSG00000104164	0.100955	0.402031	0.756285	-1.32225	96.1713	127.163
ENSG00000054148	0.101935	0.405382	0.778304	-1.28484	103.766	133.324
ENSG00000103479	0.102184	0.405526	0.732731	-1.36476	91.0224	124.223
ENSG00000184897	0.102441	0.405526	0.733548	-1.36324	94.0951	128.274
ENSG00000110801	0.102507	0.405526	0.771658	-1.29591	98.5925	127.767
ENSG00000149182	0.102622	0.405526	0.799011	-1.25155	107.426	134.448
ENSG00000112137	0.102665	0.405526	0.794746	-1.25826	111.293	140.036
ENSG00000100097	0.102964	0.406157	0.818259	-1.22211	270.035	330.012
ENSG00000173436	0.103752	0.408251	0.860027	-1.16275	146.277	170.085
ENSG00000177565	0.104238	0.408251	0.746403	-1.33976	93.9035	125.808
ENSG00000165280	0.104263	0.408251	0.81253	-1.23072	114.287	140.656
ENSG00000112851	0.104266	0.408251	0.732405	-1.36536	90.5311	123.608
ENSG00000173193	0.104281	0.408251	0.795923	-1.2564	106.376	133.651
ENSG00000198168	0.104332	0.408251	0.810457	-1.23387	113.522	140.071
ENSG00000123505	0.104968	0.409688	0.770609	-1.29768	99.6168	129.27
ENSG00000091317	0.10498	0.409688	0.85927	-1.16378	138.444	161.118
ENSG00000177885	0.105745	0.411381	0.873197	-1.14522	176.134	201.712
ENSG00000130813	0.105857	0.411381	0.76141	-1.31335	97.1776	127.628
ENSG00000188822	0.106055	0.411381	0.756491	-1.32189	96.5876	127.678
ENSG00000151366	0.106089	0.411381	0.847478	-1.17997	130.504	153.991
ENSG00000186283	0.106147	0.411381	0.75598	-1.32279	95.2659	126.016
ENSG00000276509	0.106186	?	0.662341	-1.5098	77.9485	117.686
ENSG00000121413	0.106258	0.411381	0.708792	-1.41085	85.5128	120.646
ENSG00000160213	0.106693	0.411797	0.84278	-1.18655	136.639	162.129
ENSG00000164754	0.106771	0.411797	0.830965	-1.20342	121.458	146.165
ENSG00000178567	0.106788	0.411797	0.740665	-1.35014	92.2864	124.599
ENSG00000149136	0.107224	0.412353	0.761179	-1.31375	96.7936	127.163
ENSG00000115241	0.10733	0.412353	0.813865	-1.22871	112.229	137.896
ENSG00000084754	0.107495	0.412353	0.827341	-1.20869	120.964	146.208
ENSG00000167642	0.107497	0.412353	0.810719	-1.23347	110.691	136.535
ENSG00000174780	0.107694	0.412532	0.81886	-1.22121	114.774	140.163
ENSG00000161671	0.107826	0.412532	0.80384	-1.24403	109.283	135.952
ENSG00000247556	0.108763	0.415574	0.767298	-1.30327	97.7743	127.427
ENSG00000162521	0.109574	0.418126	0.831714	-1.20234	120.34	144.689
ENSG00000171222	0.109845	0.418128	0.843741	-1.1852	127.111	150.652
ENSG00000070814	0.10986	0.418128	0.826526	-1.20988	118.631	143.529
ENSG00000117448	0.110114	0.418549	0.781039	-1.28035	100.858	129.133
ENSG00000171735	0.110485	0.419412	0.756653	-1.32161	95.4107	126.096
ENSG00000169764	0.110631	0.419423	0.808472	-1.2369	111.496	137.909
ENSG00000119705	0.111568	0.422428	0.837613	-1.19387	121.149	144.636
ENSG00000079263	0.111716	0.422441	0.823995	-1.2136	119.299	144.781
ENSG00000254505	0.112175	0.423627	0.759104	-1.31734	96.7805	127.493
ENSG00000169813	0.112397	0.423919	0.876309	-1.14115	193.64	220.972
ENSG00000177683	0.113201	0.425525	0.772124	-1.29513	98.6086	127.711
ENSG00000164405	0.113266	0.425525	0.867066	-1.15332	165.63	191.024
ENSG00000144674	0.113348	0.425525	0.784938	-1.27399	105.419	134.302
ENSG00000144028	0.113405	0.425525	0.758237	-1.31885	95.1208	125.45
ENSG00000118482	0.11383	0.426404	0.779515	-1.28285	100.79	129.298
ENSG00000067533	0.113931	0.426404	0.746694	-1.33924	91.4059	122.414
ENSG00000214046	0.114274	0.427039	0.807947	-1.2377	108.963	134.863
ENSG00000164054	0.114509	0.427039	0.793182	-1.26074	103.745	130.796
ENSG00000178719	0.114701	0.427039	0.721571	-1.38586	87.7317	121.584
ENSG00000115286	0.114702	0.427039	0.849591	-1.17704	126.832	149.286
ENSG00000090273	0.115005	0.427039	0.835318	-1.19715	121.96	146.004
ENSG00000071994	0.115091	0.427039	0.801276	-1.24801	106.88	133.388
ENSG00000091542	0.115124	0.427039	0.75487	-1.32473	93.5848	123.975
ENSG00000132780	0.115693	0.428607	0.823973	-1.21363	116.609	141.52
ENSG00000146830	0.115828	?	0.698659	-1.43131	82.6167	118.25
ENSG00000152457	0.115863	0.428694	0.745079	-1.34214	91.4395	122.725
ENSG00000198830	0.116389	0.430093	0.887191	-1.12715	347.309	391.471
ENSG00000152601	0.116898	0.430797	0.856424	-1.16765	140.759	164.357
ENSG00000089053	0.116909	0.430797	0.834086	-1.19892	119.791	143.62
ENSG00000168918	0.117021	0.430797	0.847362	-1.18013	128.36	151.482
ENSG00000168958	0.117179	0.430805	0.789137	-1.26721	102.589	130.001
ENSG00000141252	0.11737	0.430805	0.717163	-1.39438	86.881	121.145
ENSG00000197728	0.117465	0.430805	1.10862	1.10862	381.341	343.979
ENSG00000085117	0.11793	0.431675	0.850698	-1.17551	146.177	171.832
ENSG00000146731	0.117998	0.431675	0.819398	-1.22041	113.224	138.18
ENSG00000100902	0.118231	?	0.703748	-1.42096	83.331	118.41
ENSG00000167461	0.118387	0.432557	0.800246	-1.24962	106.119	132.608
ENSG00000119844	0.118595	0.432775	0.765442	-1.30644	95.2522	124.441
ENSG00000179950	0.119822	0.436672	0.817487	-1.22326	110.305	134.932
ENSG00000172466	0.119962	0.436672	0.747041	-1.33862	93.0038	124.496
ENSG00000114331	0.120173	0.436899	0.781327	-1.27987	101.245	129.581
ENSG00000032219	0.120907	0.438826	0.772647	-1.29425	98.5052	127.49
ENSG00000276291	0.121039	0.438826	0.756399	-1.32205	93.0501	123.017
ENSG00000135108	0.121197	0.438826	0.746692	-1.33924	91.188	122.123
ENSG00000153037	0.121304	0.438826	0.796404	-1.25564	106.186	133.332
ENSG00000182718	0.121609	0.438923	0.840756	-1.18941	164.354	195.483
ENSG00000120802	0.121769	0.438923	0.790102	-1.26566	104.458	132.208
ENSG00000152689	0.121781	0.438923	0.776298	-1.28817	100.195	129.068
ENSG00000163399	0.122091	0.439194	0.750092	-1.33317	92.8289	123.757
ENSG00000139146	0.122157	0.439194	0.82709	-1.20906	117.159	141.652
ENSG00000072818	0.122513	0.439366	1.13724	1.13724	209.026	183.801
ENSG00000131876	0.122983	0.439366	0.773738	-1.29243	96.8378	125.156
ENSG00000180879	0.123004	0.439366	1.14222	1.14222	313.856	274.776
ENSG00000267855	0.123179	0.439366	0.775861	-1.28889	97.688	125.909
ENSG00000009413	0.12319	0.439366	0.760488	-1.31494	95.1317	125.093
ENSG00000158604	0.12322	0.439366	0.800371	-1.24942	104.778	130.912
ENSG00000257727	0.123257	0.439366	0.830948	-1.20345	115.645	139.173
ENSG00000173272	0.123542	0.439846	1.15789	1.15789	166.765	144.024
ENSG00000146112	0.123705	0.439888	0.824582	-1.21274	118.984	144.296
ENSG00000181350	0.124237	?	0.7003	-1.42796	83.6374	119.431
ENSG00000162368	0.124369	0.440594	1.15502	1.15502	164.484	142.408
ENSG00000187837	0.124604	0.440594	0.725552	-1.37826	88.8333	122.436
ENSG00000214026	0.124631	0.440594	0.796286	-1.25583	105.404	132.369
ENSG00000078140	0.124724	0.440594	0.756354	-1.32213	92.8445	122.753
ENSG00000129515	0.124799	0.440594	0.814485	-1.22777	111.546	136.952
ENSG00000165494	0.124821	0.440594	0.814112	-1.22833	108.669	133.482
ENSG00000087191	0.124958	0.440594	0.825434	-1.21148	114.527	138.748
ENSG00000127837	0.125224	0.441001	0.756075	-1.32262	93.3181	123.424
ENSG00000205981	0.126046	0.443361	0.807215	-1.23883	108.593	134.528
ENSG00000155096	0.126247	?	0.715161	-1.39829	84.5751	118.26
ENSG00000042493	0.126261	0.443534	0.83589	-1.19633	130.707	156.368
ENSG00000218739	0.126423	0.443534	0.768565	-1.30113	95.7753	124.616
ENSG00000196092	0.12685	0.443534	0.799173	-1.25129	105.324	131.791
ENSG00000170348	0.126885	0.443534	0.782643	-1.27772	101.129	129.215
ENSG00000120438	0.127049	0.443534	0.812633	-1.23057	107.402	132.166
ENSG00000011304	0.127235	0.443534	0.758978	-1.31756	93.1055	122.672
ENSG00000255198	0.127351	0.443534	0.7377	-1.35557	89.8361	121.779
ENSG00000151702	0.127444	0.443534	0.811542	-1.23222	107.319	132.241
ENSG00000138085	0.127461	0.443534	0.848662	-1.17833	125.567	147.958
ENSG00000116350	0.127692	0.4436	0.840642	-1.18957	121.717	144.791
ENSG00000162702	0.127842	0.4436	0.727823	-1.37396	87.1176	119.696
ENSG00000254275	0.128	?	0.695752	-1.43729	80.9575	116.36
ENSG00000103035	0.128058	0.4436	0.793196	-1.26072	103.175	130.075
ENSG00000111790	0.128087	0.4436	0.81484	-1.22723	108.752	133.464
ENSG00000198832	0.128513	0.443963	0.752742	-1.32848	92.2889	122.604
ENSG00000196954	0.128626	0.443963	0.854091	-1.17084	128.446	150.389
ENSG00000139168	0.128746	0.443963	0.791062	-1.26412	103.231	130.496
ENSG00000113851	0.128855	0.443963	0.821643	-1.21707	109.996	133.873
ENSG00000097033	0.129133	0.443963	0.797629	-1.25372	104.831	131.428
ENSG00000100225	0.129181	0.443963	0.791714	-1.26308	101.251	127.888
ENSG00000090060	0.129255	0.443963	0.880641	-1.13554	176.594	200.529
ENSG00000108669	0.129439	0.444074	0.811319	-1.23256	107.635	132.666
ENSG00000082898	0.130595	0.447515	0.760266	-1.31533	93.0234	122.356
ENSG00000143252	0.130779	0.447621	0.820737	-1.21842	111.398	135.729
ENSG00000151092	0.131298	0.448386	0.800862	-1.24865	105.539	131.781
ENSG00000058272	0.13131	0.448386	0.812233	-1.23117	111.41	137.166
ENSG00000082153	0.1317	0.448673	0.819062	-1.22091	111.918	136.641
ENSG00000183291	0.13181	0.448673	1.12645	1.12645	223.937	198.799
ENSG00000111596	0.131942	0.448673	0.755313	-1.32395	91.978	121.775
ENSG00000140941	0.132008	0.448673	0.850984	-1.17511	124.617	146.439
ENSG00000164219	0.132215	0.448856	0.727058	-1.37541	86.5698	119.069
ENSG00000165025	0.132849	0.45013	0.816414	-1.22487	111.036	136.004
ENSG00000077150	0.132898	0.45013	0.775022	-1.29029	98.3989	126.963
ENSG00000112511	0.133138	0.45042	0.768887	-1.30058	95.8627	124.677
ENSG00000158417	0.133945	0.451484	0.848446	-1.17863	128.749	151.747
ENSG00000164830	0.134205	0.451484	0.744348	-1.34346	90.221	121.208
ENSG00000132680	0.13424	0.451484	0.767313	-1.30325	95.1778	124.04
ENSG00000136603	0.13429	0.451484	0.72788	-1.37385	87.0375	119.577
ENSG00000197746	0.134299	0.451484	0.86833	-1.15164	147.087	169.391
ENSG00000155463	0.134379	0.451484	0.833287	-1.20007	116.906	140.295
ENSG00000111229	0.134626	0.451794	1.07673	1.07673	676.531	628.32
ENSG00000169241	0.134919	0.452021	0.756933	-1.32112	92.6511	122.403
ENSG00000104824	0.135042	0.452021	0.746941	-1.33879	89.7019	120.092
ENSG00000083457	0.135182	0.452021	0.789486	-1.26665	101.722	128.846
ENSG00000260621	0.135324	?	0.723204	-1.38274	85.4393	118.14
ENSG00000145016	0.135386	?	0.706747	-1.41493	82.5089	116.745
ENSG00000108953	0.13543	0.452021	0.83949	-1.1912	122.918	146.42
ENSG00000101654	0.135467	0.452021	0.807194	-1.23886	105.957	131.266
ENSG00000136536	0.135983	0.45235	0.762102	-1.31216	93.4881	122.671
ENSG00000179271	0.136085	0.45235	0.874098	-1.14404	145.804	166.805
ENSG00000214262	0.136129	0.45235	0.738922	-1.35332	88.2996	119.498
ENSG00000170606	0.136246	0.45235	0.762775	-1.311	94.1984	123.494
ENSG00000129353	0.136507	0.45235	0.758488	-1.31841	92.4917	121.942
ENSG00000159322	0.136599	0.45235	0.796147	-1.25605	100.902	126.738
ENSG00000253738	0.136684	0.45235	0.779069	-1.28358	98.112	125.935
ENSG00000163319	0.137013	0.45235	0.829674	-1.20529	112.846	136.013
ENSG00000167483	0.137038	0.45235	0.867369	-1.15291	168.725	194.526
ENSG00000162613	0.137234	0.45235	0.785485	-1.2731	99.0505	126.101
ENSG00000090863	0.137279	0.45235	0.787421	-1.26997	99.7907	126.731
ENSG00000114209	0.137423	0.45235	0.834443	-1.1984	118.114	141.549
ENSG00000168090	0.137838	0.453206	0.831666	-1.20241	112.997	135.869
ENSG00000025293	0.138337	0.454335	0.823802	-1.21388	111.973	135.923
ENSG00000007255	0.138528	0.454336	0.796483	-1.25552	101.603	127.565
ENSG00000075142	0.138648	0.454336	0.856008	-1.16821	129.808	151.644
ENSG00000134186	0.139092	0.454895	0.868207	-1.1518	138.268	159.257
ENSG00000137409	0.13913	0.454895	0.794075	-1.25933	100.12	126.084
ENSG00000112701	0.139648	0.456081	0.798742	-1.25197	102.691	128.566
ENSG00000234287	0.139865	0.456279	0.764067	-1.30879	93.3904	122.228
ENSG00000089006	0.140192	0.456836	0.800602	-1.24906	102.055	127.473
ENSG00000117280	0.140416	0.456841	0.797024	-1.25467	102.724	128.884
ENSG00000213465	0.140653	0.456841	0.796898	-1.25487	101.223	127.021
ENSG00000206573	0.140819	0.456841	0.846985	-1.18066	122.41	144.524
ENSG00000078304	0.141313	0.456841	0.827301	-1.20875	117.956	142.579
ENSG00000196199	0.141392	0.456841	0.878773	-1.13795	157.006	178.665
ENSG00000163597	0.141396	0.456841	0.786078	-1.27214	99.6794	126.806
ENSG00000115128	0.141474	0.456841	0.863779	-1.1577	135.287	156.622
ENSG00000176261	0.14159	0.456841	0.791774	-1.26299	100.129	126.461
ENSG00000125651	0.141773	0.456841	0.762108	-1.31215	93.0672	122.118
ENSG00000022840	0.14178	0.456841	0.752563	-1.32879	91.1747	121.152
ENSG00000139163	0.142208	0.456841	0.756579	-1.32174	92.1121	121.748
ENSG00000145337	0.142221	0.456841	0.870071	-1.14933	137.679	158.239
ENSG00000002834	0.142252	0.456841	0.742236	-1.34728	88.9064	119.782
ENSG00000115415	0.142382	0.456841	0.739995	-1.35136	88.9807	120.245
ENSG00000213983	0.142586	0.456915	0.744075	-1.34395	88.5617	119.023
ENSG00000090382	0.142684	?	0.683727	-1.46257	78.3033	114.524
ENSG00000102978	0.142718	0.456915	0.782785	-1.27749	96.9798	123.891
ENSG00000233913	0.143075	0.457087	1.2411	1.2411	129.898	104.664
ENSG00000088205	0.143111	0.457087	0.87031	-1.14902	138.872	159.566
ENSG00000084733	0.143274	0.457087	0.762049	-1.31225	93.2197	122.328
ENSG00000110660	0.14334	?	0.689086	-1.4512	78.9687	114.599
ENSG00000163636	0.14354	0.457087	0.777774	-1.28572	95.6152	122.934
ENSG00000143158	0.143553	0.457087	0.77527	-1.28987	96.6593	124.678
ENSG00000077232	0.143715	0.457103	0.804369	-1.24321	105.359	130.983
ENSG00000259924	0.143924	?	0.696404	-1.43595	80.2741	115.27
ENSG00000087502	0.144079	0.457429	0.782039	-1.27871	98.6079	126.091
ENSG00000130303	0.144678	0.457429	0.850844	-1.1753	126.646	148.848
ENSG00000107521	0.144709	0.457429	0.763901	-1.30907	93.471	122.36
ENSG00000160752	0.14479	0.457429	0.798532	-1.2523	103.293	129.353
ENSG00000105373	0.144857	0.457429	1.07422	1.07422	773.243	719.817
ENSG00000136930	0.145268	0.457429	0.833759	-1.19939	112.994	135.523
ENSG00000117335	0.145309	0.457429	0.748644	-1.33575	89.7985	119.948
ENSG00000141298	0.145359	0.457429	0.765009	-1.30717	93.6232	122.382
ENSG00000104325	0.145435	0.457429	0.807307	-1.23869	105.171	130.274
ENSG00000166822	0.145713	0.457429	0.751048	-1.33147	89.9653	119.786
ENSG00000233864	0.14585	0.457429	0.737906	-1.35519	87.0913	118.025
ENSG00000134717	0.145856	0.457429	0.798294	-1.25267	102.159	127.971
ENSG00000131051	0.146044	0.457429	0.899444	-1.1118	270.539	300.785
ENSG00000134049	0.146464	0.457429	0.792392	-1.262	100.026	126.233
ENSG00000127824	0.147088	0.457429	0.839757	-1.19082	120.165	143.094
ENSG00000111011	0.147202	0.457429	0.866922	-1.15351	139.978	161.466
ENSG00000003056	0.147778	0.457429	0.810528	-1.23376	106.042	130.831
ENSG00000099341	0.147791	0.457429	0.860079	-1.16268	133.152	154.814
ENSG00000214253	0.147792	0.457429	0.841558	-1.18827	119.969	142.555
ENSG00000167085	0.147851	0.457429	0.832827	-1.20073	111.921	134.387
ENSG00000235750	0.148226	0.457429	0.827729	-1.20813	113.563	137.198
ENSG00000148834	0.148292	0.457429	0.815875	-1.22568	108.547	133.044
ENSG00000134744	0.148411	0.457429	0.843843	-1.18506	118.724	140.695
ENSG00000122644	0.148438	0.457429	0.786995	-1.27066	97.9164	124.418
ENSG00000076928	0.148528	0.457429	0.83454	-1.19826	114.321	136.986
ENSG00000159884	0.148757	0.457429	0.817033	-1.22394	108.067	132.268
ENSG00000204435	0.148849	0.457429	0.860986	-1.16146	131.638	152.892
ENSG00000140350	0.148929	0.457429	0.863698	-1.15781	135.911	157.36
ENSG00000155506	0.149116	0.457429	0.741681	-1.34829	87.9592	118.594
ENSG00000197324	0.149133	0.457429	0.822999	-1.21507	109.143	132.616
ENSG00000130520	0.149187	0.457429	0.824494	-1.21286	113.967	138.226
ENSG00000104343	0.149594	0.457429	0.753554	-1.32704	90.6842	120.342
ENSG00000214113	0.14962	0.457429	0.769339	-1.29982	93.8256	121.956
ENSG00000143198	0.149688	0.457429	0.805007	-1.24223	103.038	127.996
ENSG00000259865	0.149741	?	0.732286	-1.36559	86.3913	117.975
ENSG00000171316	0.149812	0.457429	0.784671	-1.27442	99.3436	126.605
ENSG00000185651	0.149947	0.457429	0.870178	-1.14919	137.768	158.321
ENSG00000008018	0.150036	0.457429	0.887605	-1.12663	178.837	201.483
ENSG00000163811	0.150293	0.457429	0.776877	-1.28721	95.4936	122.92
ENSG00000070961	0.150391	0.457429	0.865529	-1.15536	155.151	179.256
ENSG00000102054	0.150403	0.457429	0.841206	-1.18877	116.152	138.078
ENSG00000122008	0.150464	0.457429	0.743237	-1.34546	88.5345	119.12
ENSG00000223745	0.15111	0.457429	0.815771	-1.22583	106.513	130.567
ENSG00000084093	0.151293	0.457429	0.785347	-1.27332	97.8557	124.602
ENSG00000246851	0.151308	0.457429	0.740658	-1.35015	88.2731	119.182
ENSG00000120948	0.151604	0.457429	0.779222	-1.28333	96.1087	123.339
ENSG00000170860	0.151674	0.457429	0.856798	-1.16714	126.637	147.803
ENSG00000159377	0.151787	0.457429	0.793141	-1.26081	100.856	127.16
ENSG00000134152	0.151817	0.457429	0.77298	-1.29369	95.761	123.885
ENSG00000215021	0.151908	0.457429	0.830581	-1.20398	114.303	137.618
ENSG00000055044	0.152122	0.457429	0.81629	-1.22506	105.468	129.204
ENSG00000100523	0.152188	0.457429	0.748998	-1.33512	89.1212	118.987
ENSG00000131171	0.152347	0.457429	0.891812	-1.12131	195.564	219.288
ENSG00000156675	0.152612	0.457429	0.753357	-1.32739	90.5043	120.135
ENSG00000126653	0.152758	0.457429	0.808711	-1.23654	105.585	130.56
ENSG00000156587	0.152811	0.457429	0.837661	-1.1938	114.569	136.773
ENSG00000180376	0.152813	0.457429	0.794187	-1.25915	100.325	126.324
ENSG00000160633	0.153039	0.457429	0.820218	-1.21919	106.825	130.24
ENSG00000225484	0.153079	0.457429	0.781948	-1.27886	95.8314	122.555
ENSG00000125753	0.153233	0.457429	0.861479	-1.16079	136.59	158.553
ENSG00000204568	0.153268	0.457429	0.841667	-1.18812	115.471	137.194
ENSG00000164022	0.153363	0.457429	0.816121	-1.22531	105.956	129.829
ENSG00000136279	0.153553	0.457514	0.876354	-1.14109	146.39	167.045
ENSG00000186010	0.153705	0.457514	0.894286	-1.11821	202.876	226.858
ENSG00000157191	0.154178	0.458145	0.815778	-1.22582	106.641	130.723
ENSG00000086061	0.154623	0.458145	0.858545	-1.16476	128.611	149.802
ENSG00000164323	0.154654	0.458145	0.780711	-1.28088	96.8337	124.033
ENSG00000145860	0.154703	0.458145	0.775899	-1.28883	95.0716	122.531
ENSG00000124228	0.154859	0.458145	0.8071	-1.239	103.265	127.946
ENSG00000163807	0.154914	0.458145	0.748876	-1.33533	89.5529	119.583
ENSG00000168214	0.155109	0.458145	0.766647	-1.30438	93.0421	121.362
ENSG00000171466	0.155364	?	0.718865	-1.39108	83.121	115.628
ENSG00000173230	0.155509	0.458145	0.765006	-1.30718	94.032	122.917
ENSG00000153922	0.155528	0.458145	0.811124	-1.23286	105.278	129.793
ENSG00000139726	0.155805	0.458145	0.811069	-1.23294	104.146	128.405
ENSG00000088179	0.15589	0.458145	0.743718	-1.3446	87.4164	117.54
ENSG00000031698	0.155969	0.458145	0.802324	-1.24638	101.649	126.693
ENSG00000010256	0.156049	0.458145	0.787232	-1.27027	97.5841	123.958
ENSG00000120686	0.156164	0.458145	0.80163	-1.24746	101.932	127.156
ENSG00000105568	0.156383	0.458145	0.822226	-1.21621	109.072	132.654
ENSG00000078369	0.156425	0.458145	0.771004	-1.29701	93.865	121.744
ENSG00000187742	0.156778	0.458719	0.775787	-1.28901	94.4766	121.782
ENSG00000262967	0.157009	?	0.716694	-1.3953	82.4201	115
ENSG00000144895	0.157348	0.459153	0.821494	-1.21729	109.571	133.38
ENSG00000186517	0.157386	0.459153	0.855477	-1.16894	125.387	146.57
ENSG00000072401	0.157397	0.459153	0.760918	-1.3142	91.1338	119.768
ENSG00000113013	0.157889	0.460129	0.791059	-1.26413	97.2373	122.92
ENSG00000076604	0.158265	?	0.725009	-1.37929	84.6953	116.82
ENSG00000162695	0.15922	?	0.729029	-1.37169	84.6867	116.164
ENSG00000164330	0.159229	0.463498	0.785659	-1.27282	98.3432	125.173
ENSG00000129084	0.159478	0.463498	0.871795	-1.14706	131.848	151.237
ENSG00000074370	0.159529	0.463498	0.773075	-1.29353	94.8089	122.639
ENSG00000020633	0.15964	?	0.747757	-1.33733	89.6692	119.917
ENSG00000146540	0.159747	0.463498	0.801386	-1.24784	100.29	125.146
ENSG00000164776	0.159966	?	0.705361	-1.41771	80.2744	113.806
ENSG00000066654	0.160253	0.463498	0.797655	-1.25368	100.843	126.424
ENSG00000249915	0.160262	0.463498	0.859301	-1.16374	128.219	149.213
ENSG00000112667	0.160651	0.463498	0.807514	-1.23837	102.271	126.649
ENSG00000062650	0.160766	0.463498	0.774499	-1.29116	94.6497	122.208
ENSG00000102317	0.160829	0.463498	0.899002	-1.11234	239.578	266.493
ENSG00000134851	0.160896	0.463498	0.838928	-1.192	113.166	134.894
ENSG00000136213	0.16093	0.463498	0.804561	-1.24291	101.885	126.634
ENSG00000171634	0.161004	0.463498	0.835934	-1.19627	115.073	137.658
ENSG00000088448	0.161153	0.463498	0.802315	-1.24639	101.512	126.524
ENSG00000101557	0.161582	0.463498	0.758021	-1.31922	90.4871	119.373
ENSG00000166405	0.161587	0.463498	0.82644	-1.21001	108.55	131.346
ENSG00000155368	0.16173	0.463498	1.13756	1.13756	208.161	182.988
ENSG00000110880	0.161741	0.463498	0.791311	-1.26373	98.2345	124.141
ENSG00000107937	0.16283	0.465828	0.753374	-1.32736	89.7845	119.176
ENSG00000152492	0.162873	0.465828	0.85574	-1.16858	127.419	148.899
ENSG00000094916	0.163599	0.467237	0.772987	-1.29368	94.804	122.646
ENSG00000164649	0.163685	0.467237	0.807268	-1.23875	103.066	127.673
ENSG00000130414	0.164186	0.467687	0.802297	-1.24642	100.637	125.436
ENSG00000104856	0.164204	0.467687	0.763703	-1.30941	90.744	118.821
ENSG00000205220	0.164322	0.467687	0.878039	-1.1389	149.695	170.488
ENSG00000176390	0.165308	0.467718	0.773572	-1.2927	94.0886	121.629
ENSG00000104897	0.16541	0.467718	0.769851	-1.29895	91.8872	119.357
ENSG00000198160	0.165449	0.467718	0.781185	-1.28011	95.8575	122.708
ENSG00000130811	0.165565	0.467718	0.887249	-1.12708	172.879	194.848
ENSG00000030582	0.165567	0.467718	0.818986	-1.22102	107.651	131.444
ENSG00000148634	0.165596	0.467718	0.776832	-1.28728	93.7533	120.687
ENSG00000171148	0.16579	0.467718	0.776319	-1.28813	93.3413	120.236
ENSG00000100380	0.165867	0.467718	0.897038	-1.11478	203.782	227.172
ENSG00000123545	0.166125	0.467718	0.761333	-1.31349	90.7103	119.147
ENSG00000111615	0.166155	0.467718	0.763732	-1.30936	90.8097	118.903
ENSG00000149187	0.166224	0.467718	0.813565	-1.22916	106.12	130.438
ENSG00000196591	0.166253	0.467718	0.780974	-1.28045	96.1706	123.142
ENSG00000095787	0.166732	0.467852	0.832263	-1.20154	111.902	134.456
ENSG00000160710	0.166803	0.467852	0.831476	-1.20268	110.841	133.306
ENSG00000115307	0.166915	0.467852	0.821909	-1.21668	106.854	130.007
ENSG00000132185	0.166941	0.467852	1.14855	1.14855	176.081	153.307
ENSG00000093000	0.167011	?	0.75201	-1.32977	88.7095	117.963
ENSG00000089280	0.167216	0.468172	0.900492	-1.1105	247.069	274.371
ENSG00000115540	0.167486	0.468479	0.766433	-1.30475	90.8774	118.572
ENSG00000100603	0.167828	0.468889	0.813085	-1.22988	104.302	128.28
ENSG00000113328	0.168046	0.468889	0.826951	-1.20926	109.123	131.959
ENSG00000107968	0.168205	0.468889	0.74975	-1.33378	87.872	117.202
ENSG00000111196	0.168301	?	0.742546	-1.34672	86.0517	115.887
ENSG00000077721	0.168522	0.468889	0.798016	-1.25311	100.54	125.987
ENSG00000126261	0.168571	0.468889	0.794644	-1.25843	98.2547	123.646
ENSG00000163938	0.168628	0.468889	0.802787	-1.24566	102.302	127.434
ENSG00000198692	0.168825	0.468889	1.13496	1.13496	185.369	163.326
ENSG00000181163	0.168916	0.468889	0.939873	-1.06397	779.789	829.675
ENSG00000132612	0.169101	0.468959	0.767684	-1.30262	90.843	118.334
ENSG00000115234	0.169351	0.469208	0.853978	-1.17099	120.319	140.893
ENSG00000142507	0.170295	0.470814	0.866379	-1.15423	128.93	148.815
ENSG00000100242	0.170334	0.470814	0.803736	-1.24419	101.72	126.559
ENSG00000152291	0.170555	0.470814	0.842273	-1.18726	114.853	136.361
ENSG00000185808	0.170728	0.470814	0.758597	-1.31822	90.0178	118.663
ENSG00000113649	0.170737	0.470814	0.773158	-1.2934	93.1936	120.536
ENSG00000228474	0.170969	0.470816	1.08167	1.08167	518.28	479.148
ENSG00000145494	0.171165	0.470816	0.837529	-1.19399	113.586	135.621
ENSG00000005889	0.17122	0.470816	0.742321	-1.34713	86.6311	116.703
ENSG00000076662	0.171791	0.47194	1.12617	1.12617	176.804	156.996
ENSG00000013364	0.172056	?	0.756463	-1.32194	89.3778	118.152
ENSG00000148700	0.172463	0.472461	0.868132	-1.1519	136.859	157.647
ENSG00000126070	0.1725	0.472461	0.745269	-1.3418	86.988	116.72
ENSG00000256053	0.172527	0.472461	0.760468	-1.31498	89.9716	118.311
ENSG00000186298	0.172627	0.472461	0.882412	-1.13326	143.174	162.253
ENSG00000198755	0.17317	0.472829	1.03511	1.03511	3398.24	3282.98
ENSG00000009780	0.173173	?	0.743656	-1.34471	86.9718	116.952
ENSG00000006125	0.173251	0.472829	0.770493	-1.29787	92.3358	119.84
ENSG00000109536	0.173446	0.472829	0.811568	-1.23218	103.112	127.053
ENSG00000004779	0.173659	0.472829	0.826624	-1.20974	109.518	132.488
ENSG00000136051	0.173805	0.472829	0.807937	-1.23772	102.766	127.195
ENSG00000170791	0.173822	0.472829	0.803179	-1.24505	100.288	124.864
ENSG00000071462	0.173901	0.472829	0.803491	-1.24457	100.082	124.559
ENSG00000106144	0.173912	?	0.736871	-1.35709	85.2914	115.748
ENSG00000114125	0.17425	0.472829	0.826087	-1.21053	107.91	130.628
ENSG00000114503	0.174301	0.472829	0.813427	-1.22937	102.379	125.862
ENSG00000155115	0.174853	0.472829	0.811837	-1.23177	103.788	127.843
ENSG00000175203	0.174962	0.472829	0.791273	-1.26379	96.4015	121.831
ENSG00000188976	0.175014	0.472829	0.790061	-1.26573	97.2089	123.04
ENSG00000273841	0.175156	0.472829	0.806569	-1.23982	100.56	124.676
ENSG00000111786	0.175185	0.472829	1.15213	1.15213	148.335	128.749
ENSG00000100083	0.175388	0.472829	0.802773	-1.24568	99.5	123.945
ENSG00000065518	0.175687	0.472829	0.881178	-1.13484	151.412	171.829
ENSG00000275066	0.175706	0.472829	0.823261	-1.21468	106.459	129.314
ENSG00000110108	0.175822	0.472829	0.81292	-1.23013	104.631	128.71
ENSG00000135486	0.175951	0.472829	0.944933	-1.05828	1051.15	1112.4
ENSG00000144426	0.175996	0.472829	0.767099	-1.30361	91.7956	119.666
ENSG00000257103	0.17659	0.473987	0.871865	-1.14697	130.127	149.251
ENSG00000243678	0.177186	0.474413	0.776558	-1.28773	93.6497	120.596
ENSG00000164919	0.177525	0.474413	0.912031	-1.09645	325.605	357.01
ENSG00000213463	0.177614	0.474413	0.764401	-1.30821	90.7054	118.662
ENSG00000133313	0.17773	0.474413	0.824141	-1.21338	105.819	128.399
ENSG00000099797	0.177757	0.474413	0.83952	-1.19116	113.195	134.833
ENSG00000084090	0.177799	0.474413	0.76353	-1.30971	90.345	118.325
ENSG00000120699	0.177885	0.474413	0.780806	-1.28073	94.0709	120.479
ENSG00000095906	0.178522	0.475653	0.781186	-1.28011	93.9866	120.313
ENSG00000138592	0.178972	0.475653	0.847983	-1.17927	123.677	145.848
ENSG00000080802	0.179229	0.475653	0.821196	-1.21774	105.043	127.915
ENSG00000072786	0.179262	0.475653	0.773973	-1.29203	92.756	119.844
ENSG00000111142	0.179293	0.475653	0.825647	-1.21117	108.985	132
ENSG00000115685	0.179326	0.475653	0.808952	-1.23617	102.09	126.201
ENSG00000166734	0.179334	?	0.751738	-1.33025	87.4936	116.388
ENSG00000177105	0.179512	0.475715	0.836791	-1.19504	112.936	134.963
ENSG00000117906	0.179895	0.476299	0.82706	-1.2091	106.654	128.955
ENSG00000164466	0.180283	?	0.734706	-1.36109	84.6507	115.217
ENSG00000090686	0.180445	0.476682	0.777133	-1.28678	95.3572	122.704
ENSG00000110536	0.180688	0.476682	0.772087	-1.29519	91.9055	119.035
ENSG00000140386	0.180998	0.476682	0.753824	-1.32657	87.8044	116.479
ENSG00000169230	0.181193	0.476682	0.890106	-1.12346	164.999	185.371
ENSG00000167196	0.181492	?	0.739578	-1.35212	85.6171	115.765
ENSG00000138382	0.181644	0.476682	0.806295	-1.24024	99.4627	123.358
ENSG00000180817	0.181712	0.476682	0.843445	-1.18561	117.285	139.054
ENSG00000205581	0.181797	0.476682	0.916006	-1.0917	339.615	370.756
ENSG00000105835	0.181869	?	0.7317	-1.36668	83.3634	113.931
ENSG00000013306	0.181931	0.476682	0.793188	-1.26073	96.8579	122.112
ENSG00000153774	0.18195	0.476682	0.779485	-1.2829	93.1167	119.459
ENSG00000101265	0.182111	?	0.741233	-1.3491	85.4288	115.252
ENSG00000117713	0.182209	0.476682	0.789779	-1.26618	96.5731	122.279
ENSG00000149311	0.182316	0.476682	0.87897	-1.13769	145.403	165.424
ENSG00000130204	0.182595	0.476682	0.763424	-1.30989	88.9685	116.539
ENSG00000163563	0.182604	0.476682	0.754925	-1.32463	89.0911	118.013
ENSG00000147853	0.182606	0.476682	0.76375	-1.30933	89.1975	116.789
ENSG00000169139	0.182645	0.476682	0.816999	-1.22399	102.591	125.57
ENSG00000129103	0.182729	0.476682	0.810038	-1.23451	101.136	124.854
ENSG00000275700	0.182812	0.476682	0.776155	-1.2884	92.2497	118.855
ENSG00000149600	0.183246	0.476872	0.783159	-1.27688	93.676	119.613
ENSG00000179889	0.183248	?	0.718944	-1.39093	80.9436	112.587
ENSG00000125818	0.183593	0.476872	0.806532	-1.23988	99.9625	123.941
ENSG00000187514	0.183675	0.476872	0.965108	-1.03615	3319.53	3439.54
ENSG00000166925	0.183772	0.476872	0.831961	-1.20198	109.292	131.366
ENSG00000117616	0.183794	0.476872	1.12457	1.12457	194.66	173.098
ENSG00000197170	0.183864	0.476872	0.772721	-1.29413	91.7179	118.695
ENSG00000173559	0.184123	?	0.75424	-1.32584	87.4314	115.92
ENSG00000255112	0.184277	0.477467	0.808963	-1.23615	100.593	124.348
ENSG00000132522	0.184541	0.477467	0.772403	-1.29466	91.3371	118.251
ENSG00000101367	0.184583	0.477467	0.772801	-1.29399	91.1972	118.009
ENSG00000108468	0.184823	0.477541	0.790353	-1.26526	95.923	121.367
ENSG00000168172	0.184939	0.477541	0.765443	-1.30643	90.6445	118.421
ENSG00000101966	0.185111	0.477565	0.788214	-1.26869	95.1036	120.657
ENSG00000056097	0.185405	0.477855	0.770561	-1.29776	90.8686	117.925
ENSG00000133858	0.185572	0.477855	0.776361	-1.28806	92.31	118.901
ENSG00000169375	0.185724	?	0.732062	-1.366	83.1264	113.551
ENSG00000133316	0.186007	0.477855	0.786785	-1.271	94.9863	120.727
ENSG00000129071	0.186049	0.477855	1.12692	1.12692	169.188	150.133
ENSG00000125755	0.186401	0.477855	0.766082	-1.30534	89.6797	117.063
ENSG00000054654	0.186591	0.477855	0.766348	-1.30489	92.7325	121.006
ENSG00000132341	0.18702	0.477855	0.905581	-1.10426	261.415	288.671
ENSG00000100982	0.187039	?	0.743682	-1.34466	84.8823	114.138
ENSG00000149100	0.187443	0.477855	1.12267	1.12267	181.014	161.235
ENSG00000159128	0.1876	0.477855	0.86406	-1.15733	125.649	145.417
ENSG00000244398	0.187606	0.477855	0.892398	-1.12058	187.503	210.111
ENSG00000184009	0.187644	0.477855	0.915517	-1.09228	611.711	668.159
ENSG00000138964	0.187681	0.477855	0.810117	-1.23439	101.355	125.112
ENSG00000186088	0.188002	0.477855	0.777816	-1.28565	92.2818	118.642
ENSG00000004455	0.188025	?	0.765282	-1.30671	89.2405	116.611
ENSG00000163565	0.188041	0.477855	1.10972	1.10972	268.001	241.503
ENSG00000143013	0.188367	0.477855	0.799731	-1.25042	99.6103	124.555
ENSG00000136628	0.188616	0.477855	0.791305	-1.26374	97.6059	123.348
ENSG00000143256	0.188742	0.477855	0.851739	-1.17407	115.227	135.285
ENSG00000213585	0.18885	0.477855	0.814975	-1.22703	103.304	126.757
ENSG00000083099	0.189043	0.477855	0.791148	-1.26399	95.1043	120.211
ENSG00000104131	0.189081	0.477855	0.848065	-1.17916	116.133	136.939
ENSG00000162607	0.189124	0.477855	0.799295	-1.2511	98.1306	122.771
ENSG00000122862	0.189158	0.477855	0.82097	-1.21807	126.612	154.223
ENSG00000111371	0.189245	0.477855	0.857206	-1.16658	122.758	143.207
ENSG00000170906	0.189268	0.477855	0.898313	-1.1132	181.706	202.274
ENSG00000101084	0.189311	0.477855	0.823518	-1.2143	105.627	128.263
ENSG00000130544	0.189325	?	0.717747	-1.39325	80.2757	111.844
ENSG00000184840	0.189498	0.477915	0.858176	-1.16526	127.058	148.056
ENSG00000181467	0.189911	?	0.749689	-1.33389	86.9666	116.004
ENSG00000185624	0.190233	0.478719	0.836745	-1.19511	113.828	136.036
ENSG00000147905	0.190565	0.478719	0.859104	-1.164	122.137	142.168
ENSG00000132471	0.190688	0.478719	0.805599	-1.24131	99.2417	123.19
ENSG00000083312	0.190853	?	0.725237	-1.37886	81.3711	112.199
ENSG00000198301	0.191057	0.478719	0.76787	-1.3023	90.0594	117.285
ENSG00000101182	0.191122	0.478719	0.907953	-1.10138	268.496	295.716
ENSG00000145216	0.191166	0.478719	0.797846	-1.25337	98.9367	124.005
ENSG00000181038	0.191284	0.478719	0.814787	-1.22731	101.498	124.57
ENSG00000110717	0.191463	0.478719	0.850511	-1.17576	115.993	136.38
ENSG00000173486	0.191678	0.478719	0.832473	-1.20124	114.648	137.72
ENSG00000115419	0.191728	0.478719	0.77561	-1.28931	91.6006	118.101
ENSG00000165775	0.191785	0.478719	0.810227	-1.23422	100.015	123.441
ENSG00000130338	0.191786	?	0.73985	-1.35163	84.1591	113.752
ENSG00000070081	0.19208	?	0.731071	-1.36786	87.0579	119.083
ENSG00000163596	0.192182	0.478719	0.762235	-1.31193	89.301	117.157
ENSG00000144579	0.192232	0.478719	0.827581	-1.20834	105.724	127.75
ENSG00000146247	0.192252	0.478719	0.834177	-1.19879	113.113	135.598
ENSG00000166037	0.19258	0.478719	0.799453	-1.25086	97.6788	122.182
ENSG00000141959	0.192671	0.478719	0.797384	-1.2541	98.5938	123.647
ENSG00000023191	0.193557	0.478719	0.871551	-1.14738	133.28	152.922
ENSG00000198382	0.193654	0.478719	0.836086	-1.19605	110.218	131.826
ENSG00000121579	0.193743	0.478719	0.77664	-1.2876	91.9101	118.343
ENSG00000159592	0.193931	?	0.758081	-1.31912	87.7759	115.787
ENSG00000164329	0.194088	0.478719	0.766343	-1.3049	89.2982	116.525
ENSG00000169564	0.194193	0.478719	1.1009	1.1009	273.876	248.776
ENSG00000082515	0.194214	0.478719	0.796013	-1.25626	96.2465	120.911
ENSG00000196305	0.194289	?	0.747713	-1.33741	85.5311	114.39
ENSG00000029725	0.194364	0.478719	0.795482	-1.2571	97.6137	122.71
ENSG00000164111	0.194557	0.478719	0.870377	-1.14893	134.34	154.347
ENSG00000136758	0.194571	0.478719	0.787916	-1.26917	94.8248	120.349
ENSG00000170889	0.194616	0.478719	1.03385	1.03385	3281.07	3173.66
ENSG00000108671	0.194665	0.478719	0.790928	-1.26434	95.1553	120.308
ENSG00000125827	0.194673	0.478719	0.786669	-1.27118	94.3236	119.902
ENSG00000136146	0.19484	0.478719	0.859262	-1.16379	118.022	137.353
ENSG00000135829	0.194851	0.478719	0.774718	-1.29079	91.0375	117.511
ENSG00000092094	0.195077	0.478719	0.804243	-1.2434	97.1554	120.804
ENSG00000119969	0.195571	?	0.753062	-1.32791	87.9619	116.806
ENSG00000151893	0.195761	?	0.756465	-1.32194	87.3007	115.406
ENSG00000143033	0.195766	0.478719	0.824338	-1.21309	105.816	128.364
ENSG00000122958	0.195778	?	0.745469	-1.34144	84.6384	113.537
ENSG00000009954	0.195847	0.478719	0.805741	-1.24109	100.676	124.948
ENSG00000142599	0.195923	0.478719	0.795844	-1.25653	95.891	120.49
ENSG00000136986	0.196032	0.478719	0.770695	-1.29753	90.0845	116.887
ENSG00000148334	0.196374	?	0.755132	-1.32427	86.6274	114.718
ENSG00000213145	0.196387	0.478719	1.13469	1.13469	630.103	555.307
ENSG00000104886	0.196552	0.478719	0.825057	-1.21204	104.732	126.939
ENSG00000175756	0.196639	0.478719	0.868683	-1.15117	125.661	144.657
ENSG00000143621	0.197068	0.478719	0.838879	-1.19207	112.908	134.593
ENSG00000141510	0.1971	0.478719	0.773682	-1.29252	90.7321	117.273
ENSG00000163848	0.197234	0.478719	0.799035	-1.25151	97.1553	121.591
ENSG00000196072	0.197282	0.478719	1.12985	1.12985	155.763	137.862
ENSG00000162819	0.197482	0.478719	0.76226	-1.31189	88.5933	116.225
ENSG00000181061	0.197626	?	0.755912	-1.3229	86.994	115.085
ENSG00000131778	0.197656	?	0.73315	-1.36398	82.8208	112.966
ENSG00000071054	0.197796	0.478719	0.782647	-1.27771	92.7073	118.454
ENSG00000178057	0.197865	0.478719	0.860456	-1.16217	121.457	141.154
ENSG00000092199	0.197984	0.478719	0.912598	-1.09577	279.65	306.433
ENSG00000137504	0.198064	?	0.763031	-1.31056	88.317	115.745
ENSG00000162434	0.198232	0.478719	0.897773	-1.11387	188.168	209.595
ENSG00000119541	0.198242	0.478719	0.818184	-1.22222	103.705	126.75
ENSG00000134748	0.19836	0.478719	0.797974	-1.25317	96.2224	120.583
ENSG00000103769	0.198591	0.478719	0.841554	-1.18828	111.155	132.083
ENSG00000163956	0.198751	0.478719	0.827861	-1.20793	105.38	127.292
ENSG00000102189	0.198777	?	0.762713	-1.31111	88.0898	115.495
ENSG00000166181	0.198996	?	0.749425	-1.33436	85.2682	113.778
ENSG00000273448	0.199053	?	0.713922	-1.40071	78.9782	110.626
ENSG00000197961	0.199095	?	0.730819	-1.36833	82.1764	112.444
ENSG00000144746	0.199108	0.478719	1.10549	1.10549	250.553	226.644
ENSG00000102580	0.199235	0.478719	0.766865	-1.30401	91.436	119.233
ENSG00000196233	0.199253	0.478719	0.781712	-1.27924	92.7182	118.609
ENSG00000175782	0.199366	0.478719	0.780304	-1.28155	93.9029	120.342
ENSG00000280789	0.199447	?	0.736054	-1.3586	82.4462	112.011
ENSG00000033170	0.199541	?	0.756717	-1.3215	86.9261	114.873
ENSG00000161011	0.199575	0.478719	0.860357	-1.16231	119.593	139.003
ENSG00000168924	0.199646	?	0.74017	-1.35104	83.3526	112.613
ENSG00000119655	0.19967	0.478719	0.890046	-1.12354	159.881	179.633
ENSG00000154473	0.199842	0.478719	0.842405	-1.18708	117.094	139
ENSG00000133142	0.199897	0.478719	0.763083	-1.31047	87.8168	115.082
ENSG00000197912	0.199907	0.478719	0.787924	-1.26916	94.1671	119.513
ENSG00000123136	0.199956	0.478719	0.834559	-1.19824	110.263	132.122
ENSG00000271383	0.200038	?	0.740285	-1.35083	84.3033	113.88
ENSG00000139597	0.20009	0.478719	0.798881	-1.25175	95.4126	119.433
ENSG00000139697	0.200166	0.478719	0.788278	-1.26859	94.2941	119.62
ENSG00000136381	0.200272	?	0.757187	-1.32068	86.7968	114.631
ENSG00000182180	0.200299	0.478719	0.794333	-1.25892	94.9291	119.508
ENSG00000068878	0.20037	?	0.754651	-1.32512	86.4326	114.533
ENSG00000135976	0.2005	?	0.76748	-1.30297	89.0786	116.066
ENSG00000101294	0.201055	0.478918	0.78449	-1.27471	94.6421	120.642
ENSG00000118816	0.201265	0.478918	0.930974	-1.07414	480.798	516.447
ENSG00000188677	0.201304	0.478918	0.765344	-1.3066	88.7502	115.961
ENSG00000133703	0.201488	0.478918	0.779682	-1.28257	91.8113	117.755
ENSG00000176715	0.201825	?	0.754091	-1.3261	86.1568	114.252
ENSG00000023287	0.202093	0.478918	0.798268	-1.25271	98.5873	123.501
ENSG00000084463	0.202297	0.478918	0.811493	-1.2323	100.661	124.045
ENSG00000008083	0.202335	0.478918	0.769642	-1.2993	89.5443	116.345
ENSG00000073614	0.202357	0.478918	0.814376	-1.22793	103.983	127.685
ENSG00000267100	0.202878	0.478918	0.817639	-1.22303	102.654	125.55
ENSG00000106628	0.202901	0.478918	0.773286	-1.29318	89.6846	115.979
ENSG00000146677	0.202913	0.478918	0.791304	-1.26374	94.3515	119.235
ENSG00000172057	0.203212	0.478918	0.791396	-1.26359	94.3605	119.233
ENSG00000132388	0.20361	0.478918	0.789325	-1.26691	94.8513	120.168
ENSG00000123992	0.203682	0.478918	0.774613	-1.29097	90.2232	116.475
ENSG00000137312	0.203739	0.478918	0.784189	-1.2752	92.7696	118.3
ENSG00000086300	0.203863	0.478918	0.839422	-1.1913	111.075	132.323
ENSG00000078618	0.204122	0.478918	0.798322	-1.25263	97.9285	122.668
ENSG00000144029	0.204131	0.478918	0.804017	-1.24375	97.9926	121.879
ENSG00000130254	0.204217	0.478918	0.820678	-1.2185	102.741	125.19
ENSG00000131495	0.204247	0.478918	0.871352	-1.14764	129.896	149.075
ENSG00000119414	0.20431	0.478918	0.790521	-1.26499	93.4773	118.248
ENSG00000089737	0.204333	0.478918	0.897363	-1.11438	170.316	189.797
ENSG00000136936	0.204336	0.478918	0.794804	-1.25817	94.7246	119.18
ENSG00000105401	0.204395	0.478918	0.860127	-1.16262	118.843	138.169
ENSG00000235552	0.204491	?	0.722178	-1.3847	79.9143	110.657
ENSG00000163382	0.204619	0.478918	0.799209	-1.25124	96.4176	120.641
ENSG00000124575	0.204721	?	0.72997	-1.36992	81.9124	112.213
ENSG00000134255	0.204924	0.478918	0.823402	-1.21447	103.688	125.926
ENSG00000083937	0.204954	0.478918	0.794342	-1.2589	94.8029	119.348
ENSG00000169567	0.20497	0.478918	1.06702	1.06702	641.157	600.886
ENSG00000159593	0.205059	?	0.768188	-1.30176	88.9229	115.757
ENSG00000115760	0.205273	0.479244	0.786419	-1.27159	94.0525	119.596
ENSG00000184990	0.205873	0.480056	0.856715	-1.16725	118.665	138.512
ENSG00000077684	0.206035	0.480056	0.774768	-1.29071	90.4744	116.776
ENSG00000119535	0.20621	?	0.708083	-1.41226	77.376	109.275
ENSG00000111678	0.206272	0.480056	0.863889	-1.15756	122.941	142.311
ENSG00000160326	0.206668	0.480056	0.767987	-1.30211	89.15	116.083
ENSG00000066044	0.206847	0.480056	0.821012	-1.21801	102.762	125.165
ENSG00000165178	0.206872	0.480056	1.11561	1.11561	188.38	168.858
ENSG00000163605	0.207057	0.480056	0.787943	-1.26913	93.0435	118.084
ENSG00000122557	0.207122	?	0.762398	-1.31165	87.514	114.788
ENSG00000138600	0.207373	0.480056	0.780073	-1.28193	92.9375	119.139
ENSG00000135316	0.207481	0.480056	0.790472	-1.26507	94.9512	120.12
ENSG00000083223	0.207698	?	0.75412	-1.32605	86.5925	114.826
ENSG00000162241	0.207711	0.480056	0.8034	-1.24471	97.4696	121.321
ENSG00000101266	0.20782	0.480056	0.786399	-1.27162	92.2602	117.32
ENSG00000100614	0.207859	?	0.758553	-1.3183	86.9956	114.686
ENSG00000168439	0.207865	0.480056	0.796724	-1.25514	95.3634	119.694
ENSG00000114850	0.207987	0.480056	0.807511	-1.23837	107.821	133.523
ENSG00000135018	0.208044	?	0.761257	-1.31362	86.9348	114.199
ENSG00000179820	0.208064	?	0.738146	-1.35475	83.5536	113.194
ENSG00000146757	0.208205	0.480056	0.766917	-1.30392	88.5669	115.484
ENSG00000179958	0.208335	0.480056	0.81598	-1.22552	100.619	123.311
ENSG00000189306	0.208365	0.480056	0.80324	-1.24496	96.1278	119.675
ENSG00000087274	0.208413	0.480056	0.846121	-1.18186	111.526	131.808
ENSG00000123131	0.20843	?	0.754685	-1.32506	88.8619	117.747
ENSG00000114062	0.208696	0.480327	0.802815	-1.24562	97.4082	121.333
ENSG00000143106	0.208859	0.480327	0.855986	-1.16824	116.919	136.59
ENSG00000274020	0.209126	?	0.758174	-1.31896	86.4325	114.001
ENSG00000110011	0.209222	0.480782	0.790596	-1.26487	93.8441	118.7
ENSG00000141127	0.209464	?	0.769413	-1.29969	88.6708	115.245
ENSG00000109133	0.209553	?	0.759068	-1.31741	86.4058	113.831
ENSG00000204267	0.209623	0.481326	0.772076	-1.29521	88.9416	115.198
ENSG00000137193	0.209818	?	0.759237	-1.31711	87.5661	115.334
ENSG00000186001	0.210034	?	0.764014	-1.30888	87.6898	114.775
ENSG00000100784	0.210333	0.482199	0.794987	-1.25788	95.8044	120.511
ENSG00000139180	0.210333	0.482199	0.819474	-1.2203	101.667	124.063
ENSG00000122299	0.210711	0.482687	0.766966	-1.30384	88.857	115.855
ENSG00000117748	0.210885	0.482706	0.847711	-1.17965	113.913	134.377
ENSG00000268043	0.211223	?	0.742405	-1.34697	83.1288	111.972
ENSG00000135541	0.211372	?	0.724644	-1.37999	80.0041	110.405
ENSG00000182473	0.21141	0.483529	0.782063	-1.27867	91.4484	116.932
ENSG00000132849	0.211576	?	0.736603	-1.35758	82.4834	111.978
ENSG00000177042	0.211591	0.483565	0.776914	-1.28714	90.5526	116.554
ENSG00000204463	0.211735	?	0.769728	-1.29916	88.128	114.492
ENSG00000182199	0.211759	0.483571	0.830601	-1.20395	104.831	126.211
ENSG00000107317	0.21184	?	0.68461	-1.46068	76.9063	112.336
ENSG00000123146	0.211893	?	0.757109	-1.32081	86.5664	114.338
ENSG00000075415	0.212045	0.483827	0.898441	-1.11304	183.892	204.68
ENSG00000188243	0.212202	0.483827	1.06465	1.06465	672.926	632.06
ENSG00000048649	0.21256	0.483962	0.855085	-1.16947	116.389	136.113
ENSG00000102241	0.212731	0.483962	0.773334	-1.2931	89.5729	115.827
ENSG00000162236	0.212825	0.483962	0.78823	-1.26866	93.7401	118.925
ENSG00000011114	0.212944	?	0.755321	-1.32394	85.627	113.365
ENSG00000104972	0.213014	?	0.764355	-1.30829	87.2407	114.136
ENSG00000177917	0.213135	0.483962	0.800007	-1.24999	95.0551	118.818
ENSG00000153048	0.213172	0.483962	0.813073	-1.2299	101.957	125.398
ENSG00000162408	0.213247	?	0.751563	-1.33056	84.7815	112.807
ENSG00000143553	0.213597	0.483962	0.780767	-1.28079	90.5323	115.953
ENSG00000114416	0.213702	0.483962	0.825804	-1.21094	103.248	125.027
ENSG00000077420	0.213935	0.483962	0.875064	-1.14277	128.664	147.034
ENSG00000173113	0.214248	0.483962	1.09904	1.09904	255.896	232.837
ENSG00000092330	0.214431	0.483962	0.821736	-1.21694	100.943	122.841
ENSG00000151292	0.21456	0.483962	0.819097	-1.22086	101.594	124.031
ENSG00000055163	0.214645	0.483962	0.81538	-1.22642	99.818	122.419
ENSG00000130402	0.214732	0.483962	0.788919	-1.26756	93.667	118.728
ENSG00000111605	0.214753	0.483962	0.777285	-1.28653	89.9915	115.777
ENSG00000186566	0.214862	0.483962	0.851751	-1.17405	112.956	132.616
ENSG00000213024	0.214872	?	0.75042	-1.33259	84.8396	113.056
ENSG00000275052	0.21491	0.483962	0.798843	-1.25181	94.2908	118.034
ENSG00000089157	0.215202	0.48423	0.960477	-1.04115	1877.01	1954.25
ENSG00000163961	0.215489	0.48423	0.777361	-1.2864	89.9191	115.672
ENSG00000006652	0.215524	?	0.749301	-1.33458	84.8372	113.222
ENSG00000130640	0.215949	0.48423	0.784281	-1.27505	91.5176	116.69
ENSG00000211460	0.215979	0.48423	0.786938	-1.27075	92.0305	116.948
ENSG00000117318	0.216095	0.48423	1.15339	1.15339	157.697	136.725
ENSG00000141552	0.216602	0.48423	0.856907	-1.16699	117.362	136.959
ENSG00000163428	0.216635	?	0.761023	-1.31402	86.0973	113.134
ENSG00000204977	0.216769	0.48423	0.809963	-1.23462	98.9034	122.109
ENSG00000063244	0.216801	0.48423	0.782572	-1.27784	91.0712	116.374
ENSG00000061794	0.216816	0.48423	0.791818	-1.26292	93.3555	117.9
ENSG00000126945	0.217001	0.48423	0.811756	-1.2319	97.9384	120.65
ENSG00000137776	0.217079	0.48423	0.877015	-1.14023	132.247	150.792
ENSG00000143190	0.217205	?	0.75502	-1.32447	85.1394	112.764
ENSG00000214941	0.217279	0.48423	0.787139	-1.27042	91.7159	116.518
ENSG00000189091	0.2174	?	0.757624	-1.31992	85.5542	112.924
ENSG00000128915	0.217456	0.48423	0.776658	-1.28757	89.4755	115.206
ENSG00000143376	0.218031	?	0.733374	-1.36356	81.0923	110.574
ENSG00000100473	0.218131	0.48423	0.786376	-1.27166	100.442	127.728
ENSG00000166562	0.218184	0.48423	0.832917	-1.2006	124.471	149.44
ENSG00000173473	0.21848	0.48423	0.809588	-1.2352	98.0697	121.135
ENSG00000151304	0.218499	?	0.752504	-1.3289	85.362	113.437
ENSG00000141524	0.218616	0.48423	0.814683	-1.22747	100.496	123.356
ENSG00000093144	0.218788	0.48423	0.822847	-1.21529	102.112	124.095
ENSG00000125901	0.218919	0.48423	0.831671	-1.2024	103.375	124.298
ENSG00000204482	0.218928	0.48423	0.768002	-1.30208	89.6339	116.71
ENSG00000143815	0.21897	0.48423	0.834603	-1.19818	106.743	127.897
ENSG00000169599	0.219023	0.48423	0.788027	-1.26899	92.5429	117.436
ENSG00000226525	0.21933	?	0.718683	-1.39143	79.0181	109.948
ENSG00000175115	0.219368	0.48423	0.789745	-1.26623	92.4556	117.07
ENSG00000196873	0.219556	?	0.759702	-1.31631	85.8353	112.985
ENSG00000133706	0.219637	0.48423	0.822364	-1.21601	102.695	124.877
ENSG00000184787	0.219649	0.48423	0.791023	-1.26419	92.7693	117.278
ENSG00000125870	0.219668	0.48423	0.89091	-1.12245	148.216	166.365
ENSG00000125457	0.22017	0.48423	0.779117	-1.2835	90.5156	116.177
ENSG00000025800	0.220304	0.48423	0.772757	-1.29407	89.029	115.21
ENSG00000142252	0.220306	?	0.759332	-1.31695	86.1328	113.432
ENSG00000072803	0.220323	0.48423	0.785579	-1.27295	91.2874	116.204
ENSG00000138674	0.220355	0.48423	0.791638	-1.2632	93.4856	118.091
ENSG00000168310	0.220398	0.48423	0.842943	-1.18632	109.396	129.778
ENSG00000130816	0.220435	?	0.762326	-1.31178	90.4625	118.666
ENSG00000144401	0.220456	0.48423	0.805153	-1.242	96.8054	120.232
ENSG00000130312	0.22058	0.48423	0.847399	-1.18008	109.847	129.629
ENSG00000132485	0.220662	0.48423	0.880236	-1.13606	131.083	148.918
ENSG00000033800	0.221087	0.484666	0.818115	-1.22232	99.3837	121.479
ENSG00000136819	0.221299	0.484666	0.877137	-1.14007	128.047	145.982
ENSG00000070010	0.221409	0.484666	0.803974	-1.24382	95.7075	119.043
ENSG00000147155	0.221524	0.484666	0.787048	-1.27057	93.7612	119.13
ENSG00000116741	0.2219	?	0.727075	-1.37537	81.3313	111.861
ENSG00000103994	0.222063	0.485371	0.816636	-1.22454	99.9862	122.437
ENSG00000232490	0.222178	0.485371	0.766505	-1.30462	87.6163	114.306
ENSG00000108840	0.222613	?	0.763566	-1.30964	86.8196	113.703
ENSG00000101158	0.22285	0.485951	0.838887	-1.19206	106.125	126.507
ENSG00000105339	0.222854	?	0.752635	-1.32866	84.1269	111.776
ENSG00000116906	0.222866	0.485951	0.791207	-1.26389	92.8067	117.298
ENSG00000236278	0.223174	0.485951	0.787097	-1.27049	92.3135	117.284
ENSG00000175166	0.223257	0.485951	0.824857	-1.21233	101.453	122.995
ENSG00000165283	0.22345	0.485951	0.813191	-1.22972	99.6042	122.486
ENSG00000143570	0.22355	?	0.754449	-1.32547	84.3653	111.824
ENSG00000138629	0.223677	0.485951	0.800133	-1.24979	95.0361	118.775
ENSG00000187446	0.223768	?	0.765229	-1.3068	86.444	112.965
ENSG00000180304	0.22377	0.485951	0.809191	-1.2358	96.371	119.095
ENSG00000170430	0.223774	0.485951	0.797949	-1.25321	94.8755	118.899
ENSG00000101911	0.224376	0.486649	0.768825	-1.30069	88.0125	114.477
ENSG00000124226	0.224428	0.486649	0.803896	-1.24394	96.4845	120.021
ENSG00000143878	0.224521	?	0.716574	-1.39553	78.3069	109.28
ENSG00000220842	0.224562	?	0.728493	-1.3727	79.3746	108.957
ENSG00000128335	0.224781	?	0.74432	-1.34351	83.117	111.668
ENSG00000204842	0.224887	?	0.76754	-1.30286	88.0296	114.691
ENSG00000232119	0.224936	0.487202	0.821105	-1.21787	99.7183	121.444
ENSG00000160783	0.225016	0.487202	0.825617	-1.21121	102.065	123.622
ENSG00000132792	0.225449	0.487404	0.793495	-1.26025	93.1878	117.44
ENSG00000205707	0.225556	0.487404	0.771686	-1.29586	88.5794	114.787
ENSG00000134758	0.225565	?	0.752802	-1.32837	84.4029	112.118
ENSG00000217128	0.225694	0.487404	0.810851	-1.23327	98.4065	121.362
ENSG00000120805	0.225934	?	0.767162	-1.30351	86.5862	112.866
ENSG00000106615	0.225957	0.487404	0.819265	-1.22061	99.1697	121.047
ENSG00000146842	0.226256	?	0.733242	-1.36381	80.4302	109.691
ENSG00000177721	0.226338	0.487404	0.782776	-1.2775	90.0914	115.092
ENSG00000069974	0.226462	?	0.742289	-1.34718	82.3745	110.974
ENSG00000127774	0.226583	0.487404	0.794631	-1.25845	92.8677	116.869
ENSG00000179632	0.226738	0.487404	0.88122	-1.13479	131.775	149.536
ENSG00000239672	0.226912	?	0.775395	-1.28967	90.4037	116.591
ENSG00000125445	0.227	0.487404	0.801983	-1.24691	94.5777	117.93
ENSG00000108774	0.22704	0.487404	0.872031	-1.14675	121.124	138.899
ENSG00000156976	0.227173	0.487404	1.07752	1.07752	461.077	427.905
ENSG00000122965	0.227231	?	0.735359	-1.35988	81.029	110.19
ENSG00000168298	0.227413	?	0.733801	-1.36277	80.6148	109.859
ENSG00000161203	0.227457	0.487404	0.891298	-1.12196	138.024	154.857
ENSG00000099624	0.227501	0.487404	1.09429	1.09429	268.754	245.596
ENSG00000136754	0.227526	0.487404	0.835074	-1.1975	105.047	125.794
ENSG00000114956	0.227634	0.487404	0.873671	-1.1446	123.78	141.678
ENSG00000211685	0.227829	0.487404	0.709371	-1.4097	91.4989	128.986
ENSG00000108559	0.227861	0.487404	0.81275	-1.23039	97.5103	119.976
ENSG00000101474	0.22816	?	0.77171	-1.29582	88.1483	114.225
ENSG00000212664	0.228186	0.487404	0.817825	-1.22276	98.7513	120.749
ENSG00000108639	0.228192	0.487404	0.89576	-1.11637	163.564	182.598
ENSG00000184602	0.228316	?	0.752422	-1.32904	83.8998	111.506
ENSG00000135837	0.228341	0.487404	0.81094	-1.23314	97.0999	119.738
ENSG00000063854	0.228445	0.487404	0.788589	-1.26809	91.0003	115.396
ENSG00000115677	0.228729	?	0.749154	-1.33484	83.126	110.96
ENSG00000174903	0.228808	?	0.763648	-1.3095	85.8947	112.48
ENSG00000198887	0.228818	?	0.777594	-1.28602	89.0344	114.5
ENSG00000154305	0.229138	0.488494	0.806635	-1.23972	96.5096	119.645
ENSG00000128340	0.22929	0.488494	0.918255	-1.08902	319.598	348.05
ENSG00000170581	0.229338	?	0.756085	-1.3226	84.7835	112.135
ENSG00000169925	0.229594	?	0.771246	-1.2966	87.9717	114.064
ENSG00000124422	0.229827	?	0.773388	-1.29301	88.2847	114.153
ENSG00000154001	0.229955	0.489219	0.798943	-1.25165	95.0323	118.948
ENSG00000225470	0.229965	0.489219	0.799098	-1.25141	94.8433	118.688
ENSG00000171608	0.230065	?	0.734891	-1.36075	80.277	109.237
ENSG00000104388	0.230151	0.489258	0.855118	-1.16943	111.925	130.888
ENSG00000015153	0.230671	0.489682	0.793287	-1.26058	92.7602	116.932
ENSG00000141543	0.230797	0.489682	0.794551	-1.25857	93.0344	117.091
ENSG00000122705	0.230921	0.489682	0.870154	-1.14922	119.14	136.918
ENSG00000085231	0.23102	0.489682	0.78604	-1.2722	91.2973	116.148
ENSG00000139624	0.231095	?	0.765286	-1.3067	86.3887	112.884
ENSG00000086758	0.231461	?	0.749705	-1.33386	82.9963	110.705
ENSG00000118260	0.231526	0.490002	0.801519	-1.24763	95.4286	119.06
ENSG00000065135	0.231607	0.490002	0.819836	-1.21976	99.1718	120.965
ENSG00000196187	0.232107	0.490002	0.789212	-1.26709	91.2921	115.675
ENSG00000047410	0.232217	0.490002	0.882908	-1.13262	133.528	151.237
ENSG00000171865	0.23229	?	0.760922	-1.3142	85.4262	112.267
ENSG00000116731	0.232373	0.490002	0.869906	-1.14955	125.211	143.936
ENSG00000160683	0.232501	0.490002	0.812129	-1.23133	97.5007	120.056
ENSG00000167996	0.232676	0.490002	1.03883	1.03883	1987.7	1913.4
ENSG00000117676	0.232804	?	0.774216	-1.29163	88.6452	114.497
ENSG00000004059	0.232875	0.490002	0.873867	-1.14434	121.597	139.148
ENSG00000067048	0.233154	0.490002	0.786972	-1.27069	90.9969	115.629
ENSG00000204138	0.233387	?	0.779973	-1.2821	89.3233	114.521
ENSG00000185404	0.233612	0.490002	0.819012	-1.22098	101.265	123.643
ENSG00000118620	0.233632	0.490002	0.809379	-1.23552	97.1073	119.978
ENSG00000232300	0.233669	0.490002	0.799312	-1.25108	93.8797	117.451
ENSG00000262814	0.233772	0.490002	0.78939	-1.2668	91.278	115.631
ENSG00000138078	0.233799	?	0.744923	-1.34242	82.0448	110.139
ENSG00000122257	0.233868	0.490002	0.818629	-1.22155	98.5192	120.346
ENSG00000107672	0.234007	0.490002	0.785801	-1.27259	90.0776	114.632
ENSG00000137815	0.234011	0.490002	0.878869	-1.13783	131.461	149.58
ENSG00000131507	0.234021	0.490002	0.814306	-1.22804	98.1257	120.502
ENSG00000181222	0.234074	?	0.771691	-1.29586	87.2475	113.06
ENSG00000144034	0.234239	0.490104	0.796075	-1.25616	92.8309	116.611
ENSG00000164134	0.234252	?	0.780772	-1.28078	89.2857	114.356
ENSG00000054282	0.234605	0.490104	0.801599	-1.24751	93.4096	116.529
ENSG00000086232	0.23476	0.490104	0.811909	-1.23167	96.9156	119.368
ENSG00000175309	0.234969	0.490104	0.852187	-1.17345	110.778	129.993
ENSG00000168438	0.235022	0.490104	0.858067	-1.16541	113.471	132.24
ENSG00000144118	0.235076	0.490104	0.783255	-1.27672	90.1368	115.08
ENSG00000139370	0.23517	?	0.763247	-1.31019	86.4295	113.239
ENSG00000244716	0.235269	0.490158	0.888933	-1.12494	138.445	155.742
ENSG00000166508	0.235488	?	0.763566	-1.30964	87.8366	115.035
ENSG00000079459	0.235566	0.490404	0.85967	-1.16324	113.5	132.028
ENSG00000245849	0.235752	0.490404	0.793595	-1.26009	92.1206	116.08
ENSG00000146007	0.235963	0.490404	0.842442	-1.18702	106.654	126.601
ENSG00000160856	0.236059	0.490404	0.771038	-1.29695	87.7687	113.832
ENSG00000005844	0.236242	?	0.756679	-1.32156	84.4051	111.547
ENSG00000107099	0.236329	0.490618	0.872963	-1.14552	124.63	142.767
ENSG00000196459	0.236335	?	0.762687	-1.31115	85.1995	111.71
ENSG00000167703	0.236447	?	0.759893	-1.31598	84.6419	111.387
ENSG00000089335	0.236807	0.49126	0.820357	-1.21898	99.0977	120.798
ENSG00000117151	0.236911	?	0.759774	-1.31618	85.3273	112.306
ENSG00000248275	0.237041	?	0.765249	-1.30676	85.5664	111.815
ENSG00000114744	0.237073	0.491402	0.813402	-1.2294	96.0463	118.08
ENSG00000112282	0.237242	?	0.748603	-1.33582	82.297	109.934
ENSG00000162734	0.237396	?	0.764209	-1.30854	85.4682	111.839
ENSG00000198707	0.23746	?	0.75569	-1.32329	85.5148	113.161
ENSG00000053501	0.237718	0.491402	0.818551	-1.22167	98.484	120.315
ENSG00000105185	0.237778	0.491402	0.843365	-1.18573	108.733	128.927
ENSG00000139154	0.238089	?	0.755253	-1.32406	83.4069	110.436
ENSG00000153395	0.238241	?	0.759548	-1.31657	84.6207	111.409
ENSG00000183891	0.238267	?	0.754155	-1.32599	83.7133	111.003
ENSG00000117222	0.2383	?	0.752399	-1.32908	83.5531	111.049
ENSG00000106367	0.238314	?	0.761759	-1.31275	85.1138	111.733
ENSG00000169228	0.2384	?	0.757604	-1.31995	84.0248	110.909
ENSG00000114446	0.238709	0.491402	0.86841	-1.15153	119.268	137.34
ENSG00000139372	0.238728	0.491402	0.794009	-1.25943	91.9196	115.766
ENSG00000095015	0.238787	0.491402	0.834163	-1.19881	104.015	124.694
ENSG00000057757	0.238832	0.491402	0.816867	-1.22419	97.1535	118.934
ENSG00000109390	0.238872	0.491402	0.873117	-1.14532	121.988	139.716
ENSG00000086504	0.238897	0.491402	0.800321	-1.2495	93.2937	116.57
ENSG00000177879	0.238987	0.491402	0.844107	-1.18468	106.821	126.549
ENSG00000123009	0.239	?	0.751193	-1.33122	82.8622	110.307
ENSG00000031003	0.239199	?	0.776816	-1.28731	87.9351	113.199
ENSG00000048828	0.239357	?	0.778799	-1.28403	88.3162	113.4
ENSG00000168701	0.239383	?	0.783047	-1.27706	89.8103	114.693
ENSG00000184983	0.239445	0.491402	0.848908	-1.17798	111.43	131.262
ENSG00000134294	0.239531	0.491402	0.808615	-1.23668	96.2476	119.028
ENSG00000139192	0.239627	?	0.7532	-1.32767	83.1123	110.346
ENSG00000224137	0.239643	0.491402	0.801739	-1.24729	96.6071	120.497
ENSG00000119314	0.239798	0.491402	0.805334	-1.24172	95.4235	118.489
ENSG00000107951	0.240045	?	0.747479	-1.33783	81.9055	109.576
ENSG00000230734	0.240137	?	0.728109	-1.37342	78.4834	107.791
ENSG00000172500	0.240144	0.491402	0.820245	-1.21915	100.082	122.014
ENSG00000023318	0.240198	0.491402	0.85395	-1.17103	112.001	131.156
ENSG00000066923	0.240249	0.491402	0.780409	-1.28138	91.0735	116.7
ENSG00000048052	0.240276	?	0.773518	-1.29279	87.4409	113.043
ENSG00000215845	0.240281	0.491402	1.10767	1.10767	192.322	173.628
ENSG00000075407	0.240319	?	0.771631	-1.29596	87.3327	113.179
ENSG00000163191	0.240385	0.491402	0.855114	-1.16943	127.514	149.119
ENSG00000143314	0.240456	0.491402	0.784503	-1.27469	89.7454	114.398
ENSG00000241106	0.240534	0.491402	1.11907	1.11907	163.595	146.188
ENSG00000108256	0.240574	0.491402	0.800611	-1.24905	93.4818	116.763
ENSG00000104133	0.241059	0.491677	0.793143	-1.26081	91.5678	115.449
ENSG00000021355	0.241066	0.491677	0.873214	-1.1452	120.585	138.094
ENSG00000164898	0.241213	0.491677	0.784587	-1.27456	89.3327	113.859
ENSG00000138496	0.241312	?	0.759027	-1.31748	84.6358	111.506
ENSG00000087338	0.241577	?	0.778823	-1.28399	88.4256	113.538
ENSG00000185811	0.241723	0.492147	0.870716	-1.14848	121.574	139.625
ENSG00000134086	0.241783	0.492147	0.793837	-1.25971	91.624	115.419
ENSG00000239453	0.24181	?	0.769787	-1.29906	85.9841	111.699
ENSG00000074201	0.241948	0.492147	0.87567	-1.14198	120.523	137.635
ENSG00000144909	0.241952	?	0.751328	-1.33098	82.5808	109.913
ENSG00000155629	0.242129	?	0.782881	-1.27733	89.3063	114.074
ENSG00000102409	0.242157	?	0.769367	-1.29977	86.6923	112.68
ENSG00000119929	0.242261	0.49244	0.785874	-1.27247	89.6303	114.052
ENSG00000104365	0.242934	0.492584	0.78255	-1.27787	89.0685	113.818
ENSG00000162600	0.243007	0.492584	0.779794	-1.28239	88.9605	114.082
ENSG00000109519	0.243026	?	0.782644	-1.27772	88.4906	113.066
ENSG00000111832	0.24308	0.492584	0.882534	-1.1331	134.185	152.045
ENSG00000174353	0.243221	0.492584	0.849258	-1.1775	109.921	129.432
ENSG00000153179	0.24328	0.492584	0.787212	-1.27031	89.8459	114.132
ENSG00000237190	0.243321	?	0.76966	-1.29927	85.9148	111.627
ENSG00000003756	0.243388	0.492584	0.838904	-1.19203	104.333	124.368
ENSG00000141867	0.243512	0.492584	0.856437	-1.16763	111.819	130.563
ENSG00000173145	0.243862	0.492951	0.795736	-1.2567	92.0764	115.712
ENSG00000258757	0.244243	?	0.754169	-1.32596	82.697	109.653
ENSG00000165669	0.244477	0.493465	0.85272	-1.17272	110.857	130.004
ENSG00000206560	0.244508	?	0.729658	-1.37051	79.3722	108.78
ENSG00000123106	0.244628	0.493465	0.805559	-1.24137	94.4806	117.286
ENSG00000096746	0.245048	0.493465	0.868453	-1.15147	116.077	133.659
ENSG00000077044	0.245179	0.493465	0.797353	-1.25415	93.1503	116.824
ENSG00000002822	0.245524	0.493465	0.79034	-1.26528	90.3785	114.354
ENSG00000158869	0.245615	?	0.731618	-1.36683	81.1419	110.907
ENSG00000070423	0.245672	0.493465	0.826837	-1.20943	100.775	121.88
ENSG00000122068	0.245821	?	0.785671	-1.2728	89.4631	113.868
ENSG00000162910	0.245865	0.493465	0.822469	-1.21585	99.2944	120.727
ENSG00000141232	0.246108	?	0.754412	-1.32553	83.4309	110.591
ENSG00000188735	0.246296	?	0.762766	-1.31102	84.4522	110.718
ENSG00000145012	0.246486	0.493465	0.795635	-1.25686	92.4526	116.2
ENSG00000057608	0.246487	0.493465	0.906936	-1.10261	179.282	197.679
ENSG00000110172	0.246495	0.493465	0.804243	-1.24341	94.5644	117.582
ENSG00000004478	0.246557	?	0.778359	-1.28475	87.6698	112.634
ENSG00000153283	0.246587	?	0.747404	-1.33796	81.796	109.44
ENSG00000128463	0.246602	0.493465	0.83461	-1.19816	103.198	123.648
ENSG00000162419	0.246604	?	0.769604	-1.29937	86.7203	112.682
ENSG00000171681	0.246605	0.493465	0.821179	-1.21776	99.7637	121.488
ENSG00000174891	0.246654	0.493465	0.790616	-1.26484	90.3327	114.256
ENSG00000277072	0.246821	?	0.77998	-1.28208	87.997	112.82
ENSG00000135446	0.246862	0.493465	0.794305	-1.25896	91.6471	115.38
ENSG00000160131	0.247019	?	0.777403	-1.28633	87.9746	113.165
ENSG00000109083	0.247507	?	0.789886	-1.26601	91.0944	115.326
ENSG00000204574	0.247544	0.493465	0.812013	-1.23151	96.8397	119.259
ENSG00000124802	0.247562	0.493465	0.813013	-1.22999	96.407	118.58
ENSG00000172115	0.247842	0.493465	0.892724	-1.12017	136.218	152.587
ENSG00000169967	0.247943	0.493465	0.790564	-1.26492	90.7722	114.819
ENSG00000105583	0.247958	0.493465	0.897152	-1.11464	144.204	160.735
ENSG00000118308	0.247981	0.493465	0.828877	-1.20645	102.05	123.118
ENSG00000110330	0.248074	?	0.766173	-1.30519	84.9539	110.881
ENSG00000142867	0.248184	0.493465	0.79545	-1.25715	91.0138	114.418
ENSG00000153006	0.248204	0.493465	0.802556	-1.24602	93.9407	117.052
ENSG00000183049	0.248294	0.493465	0.825094	-1.21198	101.359	122.845
ENSG00000164609	0.248328	0.493465	0.825013	-1.2121	100.794	122.172
ENSG00000124243	0.248352	0.493465	0.857778	-1.1658	112.459	131.105
ENSG00000243716	0.248394	?	0.756763	-1.32142	83.6906	110.59
ENSG00000169288	0.248547	0.493465	0.813612	-1.22909	97.3154	119.609
ENSG00000104154	0.248593	?	0.741833	-1.34801	80.3715	108.342
ENSG00000126768	0.248674	0.493465	0.800061	-1.2499	92.5823	115.719
ENSG00000269821	0.248808	?	0.772789	-1.29401	88.6871	114.762
ENSG00000138381	0.249037	0.493542	0.795559	-1.25698	91.5382	115.062
ENSG00000115806	0.24905	0.493542	0.794517	-1.25863	91.0455	114.592
ENSG00000253626	0.24916	?	0.731132	-1.36774	78.3063	107.103
ENSG00000160654	0.249445	?	0.730052	-1.36977	84.1025	115.201
ENSG00000142347	0.249683	0.49413	0.848282	-1.17885	111.798	131.794
ENSG00000181192	0.249783	?	0.77013	-1.29848	85.7754	111.378
ENSG00000108349	0.249812	?	0.763371	-1.30998	84.5068	110.702
ENSG00000152332	0.249902	0.49413	0.809908	-1.23471	95.5931	118.03
ENSG00000204370	0.249987	0.49413	0.839996	-1.19048	103.85	123.632
ENSG00000089820	0.250003	?	0.790483	-1.26505	90.4448	114.417
ENSG00000113068	0.250024	0.49413	0.841347	-1.18857	104.865	124.639
ENSG00000163946	0.250368	0.494478	0.78379	-1.27585	88.8145	113.314
ENSG00000080345	0.250654	0.494507	0.79274	-1.26145	90.9504	114.729
ENSG00000136485	0.250864	0.494507	0.814306	-1.22804	96.7251	118.782
ENSG00000163545	0.250891	0.494507	0.78686	-1.27087	89.4167	113.637
ENSG00000120306	0.25092	?	0.738505	-1.35409	80.461	108.951
ENSG00000100258	0.250939	?	0.768958	-1.30046	85.5116	111.204
ENSG00000204569	0.251248	0.494834	0.817709	-1.22293	97.9908	119.836
ENSG00000140943	0.251313	?	0.772347	-1.29476	86.1863	111.59
ENSG00000109787	0.251395	0.494834	0.804513	-1.24299	93.8863	116.7
ENSG00000141446	0.25161	?	0.786165	-1.272	89.3018	113.592
ENSG00000101191	0.251672	?	0.781952	-1.27885	88.422	113.079
ENSG00000115816	0.251765	0.495056	0.825912	-1.21078	100.301	121.443
ENSG00000158864	0.251986	0.495056	0.828553	-1.20692	99.786	120.434
ENSG00000135506	0.252131	0.495056	0.811372	-1.23248	95.4542	117.645
ENSG00000104783	0.252251	?	0.776493	-1.28784	87.1685	112.259
ENSG00000007312	0.252294	0.495056	1.06059	1.06059	1021.89	963.511
ENSG00000274265	0.252355	0.495056	0.811914	-1.23166	95.6362	117.791
ENSG00000066294	0.252512	?	0.763392	-1.30994	85.2203	111.634
ENSG00000105821	0.252614	0.495232	0.794299	-1.25897	90.8871	114.424
ENSG00000123908	0.252969	?	0.777014	-1.28698	87.2833	112.332
ENSG00000111144	0.253147	0.495689	0.882048	-1.13373	124.496	141.145
ENSG00000227057	0.253444	?	0.789238	-1.26704	89.6675	113.613
ENSG00000274627	0.253451	?	0.746057	-1.34038	80.828	108.34
ENSG00000167470	0.253454	?	0.763122	-1.31041	84.6487	110.924
ENSG00000170542	0.253561	0.495689	0.793746	-1.25985	90.576	114.112
ENSG00000181852	0.25363	0.495689	0.804142	-1.24356	93.7609	116.597
ENSG00000113580	0.253663	0.495689	0.832324	-1.20146	103.145	123.924
ENSG00000032389	0.253695	?	0.753328	-1.32744	82.2508	109.183
ENSG00000132589	0.253695	0.495689	0.814707	-1.22744	96.7892	118.803
ENSG00000167986	0.254095	?	0.787002	-1.27064	89.0872	113.198
ENSG00000143155	0.254517	?	0.791004	-1.26422	90.2858	114.141
ENSG00000138193	0.254676	?	0.758515	-1.31837	83.2328	109.731
ENSG00000166557	0.254808	?	0.785594	-1.27292	89.0819	113.394
ENSG00000239900	0.254833	?	0.758	-1.31926	82.8487	109.299
ENSG00000116679	0.25487	?	0.76807	-1.30197	85.2566	111.001
ENSG00000189043	0.254903	0.496924	0.92085	-1.08595	282.862	307.175
ENSG00000105258	0.254989	0.496924	0.83492	-1.19772	102.677	122.978
ENSG00000196323	0.255228	0.496924	0.791149	-1.26398	90.3037	114.142
ENSG00000143390	0.255268	0.496924	0.793283	-1.26058	90.7794	114.435
ENSG00000255717	0.255296	?	0.771793	-1.29568	85.6632	110.992
ENSG00000278053	0.255302	?	0.784032	-1.27546	89.3979	114.023
ENSG00000066427	0.255334	0.496924	0.801474	-1.2477	92.8635	115.866
ENSG00000117118	0.255347	0.496924	0.827325	-1.20872	100.633	121.637
ENSG00000066379	0.255547	?	0.790976	-1.26426	90.2366	114.082
ENSG00000164091	0.255783	?	0.777403	-1.28633	86.8181	111.677
ENSG00000172239	0.255808	?	0.788173	-1.26876	89.0998	113.046
ENSG00000074842	0.255885	0.496928	0.826146	-1.21044	107.545	130.176
ENSG00000183155	0.25589	?	0.758849	-1.31778	82.9541	109.316
ENSG00000204394	0.25592	?	0.761588	-1.31305	83.4616	109.589
ENSG00000172340	0.255938	0.496928	0.801379	-1.24785	92.7753	115.769
ENSG00000178878	0.25596	?	0.753585	-1.32699	81.8802	108.654
ENSG00000266402	0.256209	0.496928	0.82086	-1.21823	98.8711	120.448
ENSG00000204371	0.256214	?	0.779608	-1.2827	87.4066	112.116
ENSG00000145050	0.256255	0.496928	0.803112	-1.24516	98.9404	123.196
ENSG00000125826	0.256443	0.496928	0.840198	-1.1902	104.372	124.223
ENSG00000167699	0.256505	0.496928	0.831893	-1.20208	101.714	122.268
ENSG00000137767	0.256507	?	0.767134	-1.30355	84.6392	110.332
ENSG00000153914	0.256539	0.496928	0.805254	-1.24184	93.7155	116.38
ENSG00000178105	0.256567	?	0.75479	-1.32487	82.186	108.886
ENSG00000163516	0.256757	0.497005	0.788195	-1.26872	89.7109	113.818
ENSG00000151131	0.256866	?	0.771271	-1.29656	85.2862	110.579
ENSG00000101365	0.256947	0.497005	0.827562	-1.20837	100.512	121.455
ENSG00000106052	0.257134	0.497005	0.885371	-1.12947	132.025	149.119
ENSG00000006576	0.25714	?	0.776587	-1.28769	86.6576	111.588
ENSG00000106460	0.257259	0.497005	0.782226	-1.2784	88.0782	112.599
ENSG00000166197	0.257318	?	0.771957	-1.29541	86.2496	111.729
ENSG00000042429	0.257572	?	0.783554	-1.27624	88.1155	112.456
ENSG00000125375	0.257719	0.497506	0.796962	-1.25477	91.6345	114.98
ENSG00000112149	0.257788	?	0.781371	-1.2798	88.4055	113.142
ENSG00000115756	0.257908	0.497506	0.827365	-1.20866	99.8326	120.663
ENSG00000222037	0.257988	?	0.720253	-1.3884	81.6893	113.418
ENSG00000172062	0.258109	?	0.759927	-1.31592	83.0447	109.28
ENSG00000165512	0.258151	0.497506	0.849431	-1.17726	107.402	126.44
ENSG00000119048	0.258199	0.497506	0.887072	-1.1273	128.443	144.794
ENSG00000182903	0.258219	?	0.787324	-1.27013	89.1581	113.242
ENSG00000186591	0.258237	?	0.787966	-1.26909	89.1843	113.183
ENSG00000143851	0.25825	?	0.769801	-1.29904	86.9954	113.01
ENSG00000233559	0.258685	?	0.76523	-1.3068	84.8374	110.865
ENSG00000166598	0.258915	0.497831	0.866316	-1.15431	191.587	221.151
ENSG00000235989	0.259101	?	0.739619	-1.35205	79.1968	107.078
ENSG00000167671	0.259103	?	0.779519	-1.28284	87.3076	112.002
ENSG00000233762	0.259204	?	0.787924	-1.26916	88.8439	112.757
ENSG00000159840	0.259729	?	0.744825	-1.3426	80.278	107.781
ENSG00000204619	0.259801	0.497831	0.824752	-1.21249	98.7364	119.716
ENSG00000232956	0.259804	?	0.771642	-1.29594	85.5943	110.925
ENSG00000152904	0.259825	0.497831	0.813556	-1.22917	95.9763	117.971
ENSG00000175387	0.259839	?	0.793366	-1.26045	90.101	113.568
ENSG00000089597	0.259882	?	0.757096	-1.32084	82.4455	108.897
ENSG00000103423	0.259993	?	0.787095	-1.27049	88.2989	112.183
ENSG00000131236	0.260009	0.497831	0.909706	-1.09926	193.069	212.232
ENSG00000112146	0.260228	0.497831	0.812575	-1.23066	94.5712	116.385
ENSG00000141504	0.260395	0.497831	0.811455	-1.23235	94.4045	116.34
ENSG00000168288	0.260467	0.497831	0.845006	-1.18342	106.353	125.861
ENSG00000168827	0.260494	?	0.759433	-1.31677	82.8576	109.105
ENSG00000154767	0.260882	0.497831	0.824342	-1.21309	99.3386	120.507
ENSG00000138185	0.260892	0.497831	0.789087	-1.26729	90.8015	115.072
ENSG00000148690	0.261009	?	0.784595	-1.27454	88.5463	112.856
ENSG00000198937	0.261056	0.497831	0.802853	-1.24556	95.0542	118.396
ENSG00000140391	0.261109	0.497831	0.867424	-1.15284	115.823	133.525
ENSG00000118217	0.261206	?	0.768966	-1.30045	84.7771	110.248
ENSG00000111642	0.261492	0.497831	0.845934	-1.18213	106.194	125.535
ENSG00000140299	0.261578	0.497831	0.840434	-1.18986	103.079	122.65
ENSG00000177479	0.261601	0.497831	0.801892	-1.24705	92.3884	115.213
ENSG00000102908	0.261619	?	0.750849	-1.33183	81.3465	108.339
ENSG00000123268	0.261646	0.497831	0.795527	-1.25703	90.7428	114.066
ENSG00000125877	0.261652	0.497831	0.806479	-1.23996	93.2819	115.666
ENSG00000142065	0.261852	0.497831	0.779065	-1.28359	87.2208	111.956
ENSG00000141551	0.261858	0.497831	0.801725	-1.24731	92.1554	114.946
ENSG00000079277	0.261958	?	0.749138	-1.33487	80.7189	107.749
ENSG00000161016	0.261958	0.497831	1.02769	1.02769	4431.11	4311.74
ENSG00000165516	0.262025	0.497831	0.823634	-1.21413	98.2227	119.255
ENSG00000080189	0.262049	?	0.782272	-1.27833	87.4468	111.786
ENSG00000053254	0.262066	0.497831	0.803495	-1.24456	93.4637	116.321
ENSG00000154978	0.262115	0.497831	0.845543	-1.18267	107.102	126.667
ENSG00000116266	0.262413	?	0.776592	-1.28768	86.4104	111.269
ENSG00000168264	0.262571	?	0.790149	-1.26558	89.4301	113.181
ENSG00000101882	0.262782	0.498691	0.814073	-1.22839	95.6339	117.476
ENSG00000182054	0.262909	0.498691	0.831791	-1.20223	106.709	128.288
ENSG00000173511	0.263013	?	0.75449	-1.3254	82.2128	108.965
ENSG00000120705	0.263043	?	0.762287	-1.31184	83.2136	109.163
ENSG00000176700	0.263262	?	0.740465	-1.3505	79.018	106.714
ENSG00000170234	0.263874	?	0.783264	-1.27671	87.579	111.813
ENSG00000238142	0.263892	0.499807	0.787976	-1.26907	89.0846	113.055
ENSG00000109381	0.264095	0.499807	0.816426	-1.22485	95.6733	117.186
ENSG00000149196	0.26422	0.499807	0.810847	-1.23328	94.0268	115.961
ENSG00000077312	0.264384	0.499807	0.814809	-1.22728	94.7857	116.329
ENSG00000109171	0.264516	?	0.767932	-1.3022	84.2943	109.768
ENSG00000165476	0.264543	?	0.759201	-1.31717	82.425	108.568
ENSG00000226360	0.264568	?	0.758283	-1.31877	82.2358	108.45
ENSG00000166913	0.264607	0.499807	0.921193	-1.08555	264.137	286.734
ENSG00000123595	0.26467	?	0.76458	-1.30791	83.5592	109.288
ENSG00000135164	0.264684	?	0.770228	-1.29832	84.6928	109.958
ENSG00000083520	0.264691	?	0.785034	-1.27383	88.1409	112.276
ENSG00000148672	0.264855	?	0.794504	-1.25865	90.5481	113.968
ENSG00000136100	0.264911	0.499807	0.811334	-1.23254	95.5926	117.822
ENSG00000106399	0.264922	0.499807	0.865297	-1.15567	118.835	137.334
ENSG00000186480	0.264936	?	0.763887	-1.30909	83.4652	109.264
ENSG00000123064	0.265463	?	0.793198	-1.26072	89.6146	112.979
ENSG00000142396	0.265681	?	0.751358	-1.33092	80.9634	107.756
ENSG00000129460	0.265743	0.499807	0.8291	-1.20613	99.6544	120.196
ENSG00000197345	0.265789	0.499807	0.812205	-1.23122	94.5112	116.364
ENSG00000167985	0.265937	0.499807	0.800171	-1.24973	91.6415	114.527
ENSG00000112972	0.265973	?	0.749193	-1.33477	80.6883	107.7
ENSG00000110324	0.266043	?	0.797308	-1.25422	91.255	114.454
ENSG00000078699	0.266108	?	0.75383	-1.32656	81.6422	108.303
ENSG00000100575	0.26617	?	0.78752	-1.26981	88.576	112.475
ENSG00000198218	0.266222	?	0.752547	-1.32882	81.2609	107.981
ENSG00000065883	0.266311	0.499807	0.792498	-1.26183	90.0542	113.633
ENSG00000143319	0.266357	?	0.788415	-1.26837	88.5158	112.271
ENSG00000167543	0.266474	?	0.769963	-1.29876	84.8882	110.25
ENSG00000014123	0.266501	0.499807	0.803346	-1.24479	92.1208	114.671
ENSG00000164934	0.266513	?	0.79594	-1.25638	90.0597	113.149
ENSG00000118596	0.266551	?	0.777318	-1.28648	86.3684	111.111
ENSG00000072042	0.266591	?	0.787006	-1.27064	88.4456	112.382
ENSG00000140750	0.266634	0.499807	0.802154	-1.24664	92.6336	115.481
ENSG00000100815	0.266724	0.499807	0.79954	-1.25072	91.9969	115.062
ENSG00000161179	0.266767	0.499807	0.81965	-1.22003	96.5811	117.832
ENSG00000130638	0.266806	0.499807	0.815406	-1.22638	95.3861	116.98
ENSG00000083844	0.266917	?	0.767465	-1.30299	83.8266	109.225
ENSG00000163882	0.266975	?	0.788929	-1.26754	89.0377	112.859
ENSG00000061936	0.267031	0.499807	0.794071	-1.25933	90.1821	113.569
ENSG00000116918	0.267103	0.499807	0.799402	-1.25094	92.1157	115.231
ENSG00000127125	0.267231	0.499807	0.85117	-1.17485	108.275	127.207
ENSG00000234127	0.267256	?	0.760605	-1.31474	82.4406	108.388
ENSG00000164430	0.267346	?	0.760308	-1.31526	82.4447	108.436
ENSG00000204209	0.267352	0.499807	0.833141	-1.20028	100.987	121.212
ENSG00000131196	0.267498	0.499807	0.801502	-1.24766	91.5934	114.277
ENSG00000121022	0.268316	0.499807	0.81933	-1.22051	95.1219	116.097
ENSG00000149932	0.268391	0.499807	0.865991	-1.15475	113.841	131.457
ENSG00000112096	0.268495	?	0.777236	-1.28661	86.1836	110.885
ENSG00000169508	0.26893	0.499807	1.11849	1.11849	171.914	153.701
ENSG00000111653	0.268946	0.499807	0.808251	-1.23724	93.1275	115.221
ENSG00000153130	0.268952	?	0.786995	-1.27066	87.7996	111.563
ENSG00000106803	0.269105	0.499807	0.89801	-1.11357	165.558	184.361
ENSG00000169251	0.269115	?	0.761367	-1.31343	82.6114	108.504
ENSG00000272325	0.26922	0.499807	0.810876	-1.23323	92.9793	114.665
ENSG00000100359	0.269236	?	0.765377	-1.30655	83.4319	109.008
ENSG00000167515	0.269284	0.499807	0.825545	-1.21132	97.6336	118.266
ENSG00000064607	0.26948	?	0.772633	-1.29427	85.3483	110.464
ENSG00000131238	0.269502	0.499807	0.805853	-1.24092	92.4836	114.765
ENSG00000263465	0.269534	0.499807	0.873443	-1.14489	114.452	131.035
ENSG00000156531	0.269645	?	0.782063	-1.27867	87.194	111.492
ENSG00000167740	0.269853	?	0.74985	-1.3336	81.4802	108.662
ENSG00000165916	0.269879	0.499807	0.830441	-1.20418	101.175	121.832
ENSG00000203791	0.269955	?	0.767784	-1.30245	83.8477	109.207
ENSG00000118564	0.269991	?	0.790016	-1.2658	88.6461	112.208
ENSG00000074695	0.270023	0.499807	0.826668	-1.20968	102.205	123.635
ENSG00000113240	0.270175	0.499807	0.810828	-1.23331	94.1794	116.152
ENSG00000115459	0.270455	?	0.787503	-1.26984	88.1574	111.946
ENSG00000166803	0.270494	?	0.746358	-1.33984	86.6481	116.095
ENSG00000107874	0.270674	0.499807	0.803201	-1.24502	91.9349	114.461
ENSG00000114023	0.270813	0.499807	0.829926	-1.20493	98.7839	119.027
ENSG00000197872	0.270985	?	0.780189	-1.28174	87.1706	111.73
ENSG00000148444	0.271021	0.499807	0.845927	-1.18213	104.526	123.564
ENSG00000125656	0.271057	?	0.802708	-1.24578	91.6221	114.141
ENSG00000139613	0.271141	0.499807	0.827597	-1.20832	98.9608	119.576
ENSG00000123179	0.271167	0.499807	0.808221	-1.23729	92.9478	115.003
ENSG00000249859	0.271169	?	0.751267	-1.33108	81.2139	108.103
ENSG00000136709	0.271281	0.499807	0.816168	-1.22524	95.5426	117.062
ENSG00000123240	0.271373	?	0.764062	-1.30879	83.8588	109.754
ENSG00000174165	0.271421	?	0.77661	-1.28765	85.511	110.108
ENSG00000099795	0.271859	0.499807	0.89583	-1.11628	140.807	157.181
ENSG00000099860	0.27202	?	0.773747	-1.29241	85.2103	110.127
ENSG00000225663	0.272247	0.499807	0.83183	-1.20217	99.3415	119.425
ENSG00000100028	0.272451	0.499807	0.884101	-1.13109	124.404	140.712
ENSG00000154945	0.27249	?	0.760033	-1.31573	82.2645	108.238
ENSG00000182934	0.272498	0.499807	0.829339	-1.20578	98.8528	119.195
ENSG00000118412	0.272511	0.499807	0.800293	-1.24954	91.9178	114.855
ENSG00000180628	0.272605	0.499807	0.801586	-1.24753	91.8068	114.531
ENSG00000114933	0.272691	?	0.776269	-1.28821	85.7191	110.425
ENSG00000135070	0.272824	?	0.785787	-1.27261	87.269	111.059
ENSG00000143977	0.272909	0.499807	0.912191	-1.09626	186.52	204.475
ENSG00000137822	0.272981	?	0.758768	-1.31793	81.8638	107.89
ENSG00000147162	0.273031	?	0.796912	-1.25484	90.3139	113.33
ENSG00000139722	0.273041	0.499807	0.798456	-1.25242	90.5092	113.355
ENSG00000156304	0.273048	0.499807	0.81372	-1.22892	94.534	116.175
ENSG00000159658	0.273124	0.499807	0.806621	-1.23974	92.8929	115.163
ENSG00000205323	0.273124	?	0.776919	-1.28714	85.7982	110.434
ENSG00000114902	0.273326	0.499807	0.918212	-1.08907	234.823	255.739
ENSG00000150347	0.273352	0.499807	0.884274	-1.13087	145.189	164.19
ENSG00000180992	0.273386	0.499807	0.832839	-1.20071	101.331	121.67
ENSG00000136147	0.273427	0.499807	0.812923	-1.23013	94.6638	116.449
ENSG00000140374	0.273433	0.499807	0.818817	-1.22127	96.0823	117.343
ENSG00000262655	0.273722	0.499807	0.793931	-1.25956	89.4481	112.665
ENSG00000180370	0.273735	0.499807	0.879255	-1.13733	121.533	138.223
ENSG00000172869	0.273751	0.499807	0.790645	-1.26479	88.7708	112.276
ENSG00000198931	0.27378	0.499807	0.918684	-1.08851	223.496	243.279
ENSG00000168876	0.273839	0.499807	0.826119	-1.21048	97.9854	118.609
ENSG00000105700	0.273884	0.499807	0.815367	-1.22644	94.3375	115.699
ENSG00000100453	0.274018	0.499807	0.743526	-1.34494	116.6	156.82
ENSG00000173039	0.274045	?	0.771168	-1.29673	84.7806	109.938
ENSG00000147533	0.274185	?	0.792085	-1.26249	89.5473	113.053
ENSG00000005022	0.274505	0.499807	0.911522	-1.09707	230.668	253.058
ENSG00000141030	0.274534	0.499807	0.80451	-1.24299	91.87	114.194
ENSG00000136371	0.274537	0.499807	0.807512	-1.23837	92.4743	114.518
ENSG00000090615	0.27457	?	0.767688	-1.30261	83.5076	108.778
ENSG00000133740	0.274602	?	0.78382	-1.2758	87.0282	111.031
ENSG00000175376	0.274635	?	0.756318	-1.32219	81.3439	107.552
ENSG00000260032	0.275068	?	0.782994	-1.27715	86.9352	111.029
ENSG00000069345	0.275113	0.499807	0.839089	-1.19177	102.769	122.477
ENSG00000100714	0.27516	?	0.767566	-1.30282	83.4277	108.691
ENSG00000103121	0.275407	?	0.787437	-1.26994	87.5142	111.138
ENSG00000134287	0.275486	?	0.779222	-1.28333	85.8845	110.218
ENSG00000025708	0.275517	0.499807	0.852111	-1.17356	110.481	129.656
ENSG00000114779	0.275543	0.499807	0.86007	-1.1627	111.525	129.669
ENSG00000071564	0.27586	?	0.793391	-1.26041	89.6104	112.946
ENSG00000109917	0.275969	?	0.786242	-1.27187	86.9467	110.585
ENSG00000053371	0.276106	0.499807	0.814615	-1.22757	93.9101	115.282
ENSG00000108306	0.276108	?	0.770661	-1.29759	85.2152	110.574
ENSG00000084072	0.276109	0.499807	0.813087	-1.22988	93.9467	115.543
ENSG00000087087	0.276325	?	0.788118	-1.26885	88.1572	111.858
ENSG00000132716	0.276342	?	0.776316	-1.28814	85.2305	109.789
ENSG00000072756	0.276527	?	0.773201	-1.29332	84.3521	109.095
ENSG00000172725	0.276702	0.499807	0.801733	-1.2473	92.9876	115.983
ENSG00000163960	0.276811	?	0.765676	-1.30604	83.21	108.675
ENSG00000158805	0.27686	?	0.761393	-1.31338	81.9886	107.682
ENSG00000100280	0.276942	0.499807	0.804174	-1.24351	91.3297	113.57
ENSG00000100220	0.276968	0.499807	0.822554	-1.21573	97.0998	118.047
ENSG00000158526	0.27698	0.499807	0.830433	-1.20419	98.6784	118.828
ENSG00000077254	0.277017	?	0.791608	-1.26325	88.3452	111.602
ENSG00000101040	0.277171	?	0.798694	-1.25204	90.5821	113.413
ENSG00000172613	0.277466	0.499807	0.809168	-1.23584	92.5667	114.397
ENSG00000081237	0.277488	0.499807	1.07875	1.07875	381.239	353.407
ENSG00000242372	0.277535	0.499807	0.895211	-1.11705	127.44	142.357
ENSG00000125863	0.277573	0.499807	0.798542	-1.25228	90.3595	113.156
ENSG00000217555	0.277647	0.499807	0.837135	-1.19455	103.466	123.595
ENSG00000167524	0.278073	?	0.749303	-1.33457	79.9169	106.655
ENSG00000182149	0.278092	0.499807	0.820693	-1.21848	95.6645	116.566
ENSG00000136718	0.278095	0.499807	0.827223	-1.20886	97.511	117.877
ENSG00000092439	0.278143	?	0.766802	-1.30412	83.2337	108.547
ENSG00000100568	0.278151	0.499807	0.81426	-1.22811	94.9487	116.607
ENSG00000112763	0.278184	?	0.756619	-1.32167	81.6167	107.87
ENSG00000175634	0.27819	0.499807	0.804832	-1.24249	92.0066	114.318
ENSG00000168010	0.278225	?	0.781974	-1.27882	86.2591	110.309
ENSG00000198833	0.27834	0.499807	0.877755	-1.13927	139.222	158.612
ENSG00000165609	0.278465	0.499807	0.828312	-1.20727	98.1149	118.452
ENSG00000159110	0.278467	?	0.790708	-1.26469	88.423	111.828
ENSG00000136436	0.278506	0.499807	0.808251	-1.23724	92.2239	114.103
ENSG00000111540	0.278557	?	0.782622	-1.27776	86.5791	110.627
ENSG00000110429	0.278573	?	0.777163	-1.28673	86.2823	111.022
ENSG00000223496	0.278576	0.499807	0.80521	-1.24191	91.1332	113.179
ENSG00000055609	0.278579	0.499807	0.829598	-1.2054	100.034	120.581
ENSG00000213551	0.278682	0.499807	0.815367	-1.22644	96.5479	118.41
ENSG00000120437	0.278688	?	0.777364	-1.2864	85.5673	110.074
ENSG00000173120	0.278723	0.499807	0.797231	-1.25434	90.068	112.976
ENSG00000112697	0.278764	?	0.772497	-1.2945	84.7947	109.767
ENSG00000198393	0.279114	?	0.777831	-1.28563	85.9107	110.449
ENSG00000186184	0.27919	0.499807	0.881968	-1.13383	122.604	139.012
ENSG00000166347	0.279216	0.499807	0.849885	-1.17663	105.991	124.712
ENSG00000132824	0.279229	0.499807	0.807169	-1.2389	91.7678	113.691
ENSG00000179454	0.27932	?	0.776769	-1.28738	84.7692	109.131
ENSG00000155438	0.279421	0.499846	0.835532	-1.19684	101.327	121.273
ENSG00000257267	0.279931	?	0.785876	-1.27247	87.8585	111.797
ENSG00000101193	0.279978	0.500455	0.818068	-1.22239	95.3316	116.533
ENSG00000093183	0.280006	?	0.757499	-1.32013	81.5004	107.591
ENSG00000165527	0.280104	0.500455	1.09398	1.09398	200.647	183.41
ENSG00000196268	0.280143	?	0.778688	-1.28421	86.1084	110.581
ENSG00000075539	0.280312	?	0.78995	-1.2659	87.9743	111.367
ENSG00000008294	0.280552	?	0.779666	-1.2826	85.769	110.007
ENSG00000156411	0.280611	0.500882	1.08328	1.08328	261.69	241.572
ENSG00000102738	0.280686	0.500882	0.811646	-1.23206	93.187	114.812
ENSG00000204438	0.280745	?	0.793557	-1.26015	88.7977	111.898
ENSG00000226179	0.281269	?	0.760353	-1.31518	81.6979	107.447
ENSG00000272886	0.281297	?	0.784652	-1.27445	86.4047	110.118
ENSG00000213722	0.281363	0.501647	0.851733	-1.17408	108.405	127.276
ENSG00000107949	0.281427	?	0.789757	-1.26621	87.4181	110.69
ENSG00000157045	0.281498	?	0.792094	-1.26248	88.0908	111.212
ENSG00000076513	0.281776	0.501647	0.822407	-1.21594	96.0115	116.744
ENSG00000099817	0.281827	0.501647	0.859233	-1.16383	108.066	125.771
ENSG00000243150	0.281876	?	0.741085	-1.34937	77.9082	105.127
ENSG00000164182	0.281961	?	0.774837	-1.29059	85.1365	109.877
ENSG00000068028	0.282009	0.501647	0.813478	-1.22929	93.0736	114.414
ENSG00000149923	0.28201	0.501647	0.894357	-1.11812	132.066	147.666
ENSG00000196937	0.282144	0.501647	0.858017	-1.16548	108.418	126.358
ENSG00000055130	0.282348	?	0.774577	-1.29103	84.5404	109.144
ENSG00000067829	0.282504	0.501698	0.840783	-1.18937	102.98	122.481
ENSG00000244687	0.282622	?	0.786718	-1.2711	86.9762	110.556
ENSG00000273899	0.282625	?	0.778352	-1.28477	85.1096	109.346
ENSG00000185825	0.282639	0.501698	0.892321	-1.12067	124.629	139.668
ENSG00000279103	0.282702	?	0.745948	-1.34058	78.8403	105.691
ENSG00000111276	0.282731	0.501698	0.821296	-1.21759	95.1995	115.914
ENSG00000136770	0.282962	?	0.785521	-1.27304	87.8467	111.832
ENSG00000120860	0.283019	0.501698	0.830354	-1.20431	97.8728	117.869
ENSG00000229180	0.283031	0.501698	0.817831	-1.22275	94.909	116.05
ENSG00000167775	0.283161	?	0.780534	-1.28117	85.7942	109.917
ENSG00000172795	0.283336	0.501934	0.803576	-1.24444	90.7086	112.881
ENSG00000174173	0.283593	0.501976	0.831646	-1.20243	99.1494	119.221
ENSG00000173727	0.283867	?	0.761777	-1.31272	81.5134	107.004
ENSG00000014641	0.283871	0.501976	0.874092	-1.14404	116.245	132.99
ENSG00000107679	0.283875	0.501976	0.805399	-1.24162	92.6668	115.057
ENSG00000204590	0.28402	?	0.783745	-1.27592	86.5607	110.445
[truncated: 25,112 more rows]

## Sheet: 24h post-STEMI vs control
Gene Symbol	baseMean	log2FoldChange	lfcSE	stat	pvalue	padj		Genes differentially expressed in antigen processing and presentation
AL627309.1	0.373357	0.353743	0.499269	0.708523	0.478621	NA		Gene Symbol	Gene Description
AP006222.2	1.42431	0.879284	0.425423	2.06685	0.0387487	NA		HLA-DRB5	major histocompatibility complex, class II, DR beta 5
RP4-669L17.10	0.085021	0.724782	1.16058	0.624502	0.532298	NA		KLRD1	killer cell lectin like receptor D1
RP5-857K21.4	0.00418985	0	5.84737	0	1	NA		CD8A	CD8 subunit alpha
RP11-206L10.3	0.831219	0.3189	0.492792	0.64713	0.517548	NA		CIITA	class II major histocompatibility complex transactivator
RP11-206L10.2	2.38134	0.861117	0.462851	1.86046	0.0628204	0.212267		CTSL	cathepsin L
RP11-206L10.9	0.512066	0.388074	0.48931	0.793105	0.427717	NA
LINC00115	0.870473	0.289593	0.452046	0.640627	0.521765	NA
FAM41C	0.536882	0.0779224	0.499458	0.156014	0.876022	NA
NOC2L	9.46851	-0.14048	0.208658	-0.673255	0.500785	0.700909
KLHL17	0.254229	0.268734	0.540139	0.497527	0.618817	NA
PLEKHN1	0.252392	0.320421	0.626924	0.511099	0.609281	NA
RP11-54O7.17	0.0781066	0.494014	0.881648	0.56033	0.575255	NA
HES4	4.92093	-0.555279	0.36504	-1.52115	0.128223	0.322544
ISG15	40.4541	-1.28794	0.265583	-4.84949	1.23782e-06	0.000130555
AGRN	0.10425	0.81152	0.891037	0.910759	0.362422	NA
C1orf159	0.686914	0.549252	0.465202	1.18068	0.237732	NA
TNFRSF18	4.17436	-1.68547	0.346125	-4.86954	1.11859e-06	0.000121449
TNFRSF4	7.36859	-1.16386	0.432899	-2.68852	0.00717697	0.0575841
SDF4	10.1915	-0.242078	0.199734	-1.21201	0.22551	0.451496
B3GALT6	2.23921	-0.382824	0.342633	-1.1173	0.263866	0.491711
FAM132A	0.0865404	0.423114	1.01804	0.415616	0.677691	NA
RP5-902P8.12	0.0923236	0.755572	0.950582	0.794853	0.426699	NA
UBE2J2	7.3689	-0.106155	0.216923	-0.48937	0.62458	0.787958
SCNN1D	0.187305	0.750744	0.635419	1.18149	0.237406	NA
ACAP3	3.34224	-0.255467	0.316608	-0.806888	0.419731	0.636636
PUSL1	2.59089	-0.00649562	0.309326	-0.0209993	0.983246	0.99227
CPSF3L	4.93263	-0.431999	0.263492	-1.63952	0.101105	0.281683
GLTPD1	1.58839	0.706164	0.394259	1.79112	0.0732748	NA
DVL1	0.784606	0.0550077	0.421053	0.130643	0.896058	NA
AURKAIP1	23.762	-0.338795	0.140395	-2.41316	0.0158149	0.0913624
CCNL2	12.1917	0.762735	0.249051	3.06257	0.00219447	0.0267171
RP4-758J18.2	2.61885	-0.0659585	0.311313	-0.211872	0.832207	0.915266
MRPL20	18.3227	-0.162978	0.165809	-0.982921	0.325646	0.552066
RP4-758J18.13	0.0817679	0.679737	1.05871	0.642041	0.520846	NA
ANKRD65	0.0282612	0.640639	5.2198	0.122733	0.902319	NA
ATAD3C	0.744377	0.732395	0.487907	1.5011	0.13333	NA
ATAD3B	1.90947	-0.442217	0.369881	-1.19556	0.231867	NA
ATAD3A	1.4152	-0.25407	0.398438	-0.637665	0.523692	NA
SSU72	25.845	-0.013551	0.121491	-0.111539	0.911189	0.95798
AL645728.1	1.23232	0.535431	0.403375	1.32738	0.184384	NA
C1orf233	0.216327	0.611007	0.610644	1.00059	0.317023	NA
RP11-345P4.9	1.66881	-0.0340286	0.403759	-0.0842795	0.932834	NA
MIB2	5.83681	0.636159	0.259866	2.44803	0.0143641	0.0862898
MMP23B	0.272485	0.476971	0.533502	0.894039	0.371301	NA
CDK11B	5.21703	0.880641	0.290917	3.02712	0.00246894	0.0286711
SLC35E2B	6.32083	0.678179	0.295627	2.29404	0.0217884	0.111556
RP11-345P4.7	0.158648	0.656578	0.727688	0.902279	0.366908	NA
CDK11A	16.5612	0.230419	0.192322	1.19809	0.230881	0.457979
SLC35E2	0.929108	0.323786	0.497385	0.650977	0.515061	NA
NADK	3.31854	0.615609	0.316932	1.9424	0.0520888	0.190769
GNB1	12.6901	0.248709	0.20142	1.23478	0.216913	0.439722
TMEM52	0.13295	0.424523	0.87672	0.484217	0.628232	NA
PRKCZ	1.26237	0.405008	0.450228	0.899562	0.368353	NA
RP5-892K4.1	0.182244	0.865329	0.657174	1.31674	0.187925	NA
C1orf86	13.0184	0.324914	0.166742	1.94861	0.0513422	0.189151
AL590822.2	0.109183	0.408767	0.813169	0.502685	0.615186	NA
AL590822.1	0.0429496	0.769523	1.80512	0.4263	0.669889	NA
SKI	6.12709	-0.189436	0.290575	-0.651937	0.514442	0.711126
MORN1	0.3145	0.339756	0.510665	0.665322	0.505845	NA
RER1	12.5165	-0.302482	0.173771	-1.7407	0.0817368	0.248269
PEX10	0.996067	-0.370804	0.414256	-0.895109	0.370729	NA
PLCH2	0.780842	0.769884	0.490562	1.56939	0.116556	NA
PANK4	1.02657	0.0927397	0.45423	0.204169	0.838222	NA
RP3-395M20.12	4.32969	-0.19802	0.267292	-0.740838	0.458792	0.667703
TNFRSF14	19.7236	-0.126006	0.132618	-0.950142	0.34204	0.567082
RP3-395M20.9	0.541879	0.501645	0.460379	1.08964	0.275873	NA
FAM213B	0.852758	0.22971	0.44968	0.510829	0.60947	NA
MMEL1	0.0994629	0	0.699307	0	1	NA
TTC34	0.16982	0.578163	0.740389	0.780891	0.434867	NA
MEGF6	0.538884	0.34801	0.472283	0.736867	0.461203	NA
RP11-46F15.2	0.0708914	0.654956	0.963286	0.679919	0.496556	NA
TPRG1L	2.37141	-0.120945	0.33549	-0.360502	0.718472	0.848455
WRAP73	2.63517	0.123259	0.338003	0.364668	0.715359	0.846901
TP73-AS1	0.829214	0.539916	0.428858	1.25896	0.208044	NA
SMIM1	0.577327	0.486547	0.46895	1.03752	0.299492	NA
LRRC47	2.75317	0.0563254	0.339353	0.165979	0.868174	0.933602
CEP104	3.71642	0.293325	0.313601	0.935344	0.349611	0.575034
DFFB	0.880864	1.14847	0.473136	2.42735	0.0152097	NA
C1orf174	3.27214	0.324842	0.299612	1.08421	0.278273	0.506707
NPHP4	0.314258	0.41568	0.534346	0.777923	0.436614	NA
KCNAB2	5.27656	-0.150543	0.306813	-0.490667	0.623662	0.787095
RPL22	497.763	0.0459168	0.0456065	1.0068	0.314029	0.540188
RNF207	0.517287	0.514589	0.537859	0.956736	0.3387	NA
ICMT	1.30122	0.0450644	0.4156	0.108432	0.913653	NA
GPR153	0.0183546	0	3.01286	0	1	NA
ACOT7	0.601158	-0.0139309	0.484694	-0.0287416	0.977071	NA
HES2	0.0170701	0.649229	4.60083	0.141111	0.887782	NA
ESPN	0.100951	0	0.684171	0	1	NA
TNFRSF25	11.0135	-0.466929	0.397647	-1.17423	0.240303	0.467745
NOL9	4.46039	0.584844	0.320004	1.82761	0.0676077	0.222041
ZBTB48	1.80349	0.70998	0.395259	1.79624	0.0724564	NA
KLHL21	1.61558	-0.229806	0.374331	-0.613912	0.539274	NA
PHF13	0.781906	0.352022	0.466493	0.754612	0.450482	NA
THAP3	1.9174	0.0783017	0.375792	0.208364	0.834945	NA
DNAJC11	1.79094	0.170166	0.407838	0.41724	0.676503	NA
RP11-312B8.1	0.0162863	0.727981	1.94256	0.374753	0.707844	NA
CAMTA1	13.2975	0.194014	0.160993	1.20511	0.228161	0.454537
VAMP3	3.56161	0.0513737	0.25845	0.198776	0.842438	0.921306
PER3	0.699193	0.496836	0.486783	1.02065	0.307419	NA
RP3-467L1.4	0.0817999	0.564299	1.09532	0.515193	0.606418	NA
UTS2	0.408373	0.649887	0.646254	1.00562	0.314598	NA
TNFRSF9	0.387899	-0.340167	0.563275	-0.603909	0.545904	NA
PARK7	35.4657	-0.248655	0.114923	-2.16366	0.0304905	0.137347
ERRFI1	0.951128	1.00235	0.475447	2.10823	0.0350115	NA
SLC45A1	0.0391492	0.560064	1.28625	0.435423	0.663256	NA
RERE	10.6425	0.364452	0.230886	1.57849	0.114453	0.301788
ENO1	29.5216	-0.321974	0.156724	-2.0544	0.0399369	0.162186
ENO1-AS1	0.316186	0.685934	0.502102	1.36612	0.1719	NA
CA6	0.231257	0	0.570251	0	1	NA
GPR157	0.411905	0.365745	0.498255	0.734052	0.462917	NA
H6PD	1.95627	0.190021	0.3842	0.494589	0.620891	0.786149
SPSB1	1.64551	0.204988	0.459084	0.446515	0.655225	NA
SLC25A33	6.5959	-0.0867171	0.234336	-0.370054	0.711342	0.844347
TMEM201	0.191603	0.278116	0.513715	0.541382	0.588244	NA
PIK3CD	6.08962	0.413944	0.293882	1.40854	0.158971	0.367006
RP11-558F24.4	0.859093	0.127927	0.463373	0.276078	0.782488	NA
CLSTN1	5.22716	0.317114	0.299648	1.05829	0.289925	0.516842
CTNNBIP1	2.17292	-0.0498001	0.332192	-0.149913	0.880833	0.940583
LZIC	3.09242	0.193848	0.318017	0.609552	0.542159	0.732033
NMNAT1	0.755598	0.0795545	0.483086	0.16468	0.869196	NA
RBP7	0.307221	0.630013	0.523917	1.20251	0.229168	NA
UBE4B	3.4597	-0.0607107	0.319381	-0.190088	0.84924	0.924739
KIF1B	2.25655	-0.220011	0.40316	-0.545715	0.585262	0.761005
PGD	2.31447	-0.279688	0.311921	-0.896663	0.369899	0.593687
APITD1	0.758463	-0.282404	0.434203	-0.650396	0.515437	NA
DFFA	5.82432	-0.350856	0.307724	-1.14017	0.254216	0.481533
PEX14	1.02529	-0.225163	0.427132	-0.527151	0.598088	NA
CASZ1	1.02134	0.0338563	0.418871	0.0808276	0.935579	NA
C1orf127	0.000826858	0	5.84739	0	1	NA
TARDBP	13.4126	0.479659	0.197792	2.42507	0.0153053	0.0896107
RP4-635E18.8	1.14391	1.30577	0.471399	2.76998	0.00560595	NA
SRM	17.1665	-0.167245	0.196012	-0.853239	0.393527	0.613736
EXOSC10	5.25101	0.451139	0.329263	1.37015	0.170641	0.38293
RP4-635E18.7	0.0937145	0.583555	1.01	0.577776	0.563415	NA
MTOR	2.28529	0.689165	0.413797	1.66547	0.0958195	0.272405
UBIAD1	2.68606	0.0919977	0.325023	0.28305	0.777139	0.883806
FBXO2	1.04245	0.586638	0.42046	1.39523	0.162947	NA
FBXO44	2.56588	0.289451	0.364239	0.794673	0.426804	0.642294
FBXO6	1.09396	-0.0719321	0.40668	-0.176876	0.859606	NA
MAD2L2	3.56897	-0.427238	0.266156	-1.60522	0.108446	0.291848
DRAXIN	0.104388	0	1.0556	0	1	NA
AGTRAP	3.30844	1.18117	0.407194	2.90074	0.00372279	0.0383482
MTHFR	2.92845	0.428817	0.360155	1.19064	0.233793	0.46066
CLCN6	1.29648	0.189972	0.395716	0.480071	0.631177	NA
NPPA-AS1	0.0764617	0.857771	1.06195	0.807733	0.419244	NA
KIAA2013	3.99564	0.0833867	0.280795	0.296966	0.766492	0.877774
PLOD1	0.439836	0.35129	0.627832	0.559529	0.575801	NA
MFN2	1.46517	0.496221	0.395942	1.25327	0.210108	NA
MIIP	4.28533	0.457936	0.252859	1.81103	0.0701362	0.227311
TNFRSF8	0.0812373	0.598082	1.00283	0.596392	0.550913	NA
TNFRSF1B	13.8549	-0.486327	0.216525	-2.24605	0.0247007	0.119944
VPS13D	4.13322	0.900146	0.392111	2.29564	0.0216964	0.111314
DHRS3	1.90007	-0.200862	0.440494	-0.455993	0.648395	NA
PRDM2	37.1663	0.322415	0.155426	2.07439	0.0380429	0.156911
TMEM51	0.0131118	0.619909	3.74027	0.165739	0.868362	NA
RP3-467K16.4	0.0568004	0	1.84743	0	1	NA
EFHD2	11.5583	-0.248929	0.205891	-1.20903	0.22665	0.452731
CTRC	0.0431509	0.624623	1.49874	0.416765	0.67685	NA
CASP9	2.08067	-0.307751	0.316165	-0.973387	0.330361	0.556207
DNAJC16	1.76806	0.375276	0.400705	0.936541	0.348995	NA
AGMAT	1.44678	-0.23978	0.392974	-0.610168	0.541751	NA
DDI2	3.32465	0.17028	0.346113	0.491978	0.622735	0.78698
PLEKHM2	3.73222	0.258291	0.304356	0.848647	0.396078	0.615732
SLC25A34	0.139941	0.406959	0.868985	0.468316	0.639559	NA
FBLIM1	0.209633	1.00723	0.645398	1.56064	0.11861	NA
RP11-169K16.9	3.39502	0.324777	0.301129	1.07853	0.280797	0.509368
SPEN	18.1428	1.03598	0.264358	3.91885	8.89735e-05	0.00326812
ZBTB17	2.1749	-0.12203	0.311525	-0.391717	0.695268	0.83602
EPHA2	0.00202866	0	5.84738	0	1	NA
ARHGEF19	0.589404	0.655161	0.479125	1.36741	0.171496	NA
FBXO42	3.25471	0.559814	0.338244	1.65506	0.0979119	0.276012
SZRD1	9.39749	0.00141925	0.191031	0.00742945	0.994072	0.996251
NECAP2	14.9474	-0.0642923	0.173265	-0.371064	0.71059	0.843829
RP4-798A10.2	0.580135	0.272346	0.504796	0.539518	0.58953	NA
RP4-798A10.7	0.211641	0.66447	0.550113	1.20788	0.227094	NA
NBPF1	2.43577	0.397552	0.435802	0.912229	0.361648	0.586547
CROCCP2	3.54804	0.856005	0.343311	2.49338	0.0126533	0.0793349
CROCC	0.823367	0.606872	0.45008	1.34837	0.177541	NA
RP11-108M9.4	2.07224	0.787684	0.369008	2.1346	0.0327941	0.14335
RP11-108M9.6	0.719275	0.597373	0.468562	1.27491	0.202342	NA
ATP13A2	1.7418	0.524664	0.405981	1.29234	0.19624	NA
SDHB	6.91929	-0.298188	0.201964	-1.47644	0.139826	0.339632
PADI2	0.0237607	0.729341	1.73215	0.421062	0.67371	NA
PADI4	0.559662	0.766388	0.47872	1.60091	0.109397	NA
RCC2	6.27514	0.55707	0.259443	2.14718	0.0317793	0.141316
ARHGEF10L	0.100325	0.572015	0.917744	0.623284	0.533098	NA
ALDH4A1	0.0532041	0.604892	1.49349	0.40502	0.685463	NA
IFFO2	1.95054	-0.171791	0.390877	-0.439502	0.660298	0.812226
UBR4	6.83565	0.313174	0.256395	1.22145	0.221915	0.446674
RP1-43E13.2	0.254945	0.453601	0.552143	0.821529	0.411345	NA
EMC1	1.93185	0.149916	0.407429	0.367957	0.712905	0.845659
MRTO4	3.84716	-0.311671	0.267524	-1.16502	0.24401	0.47148
AKR7A2	5.77644	-0.0534051	0.213303	-0.250372	0.8023	0.89721
PQLC2	0.560816	0.824467	0.465394	1.77155	0.0764699	NA
CAPZB	33.9444	0.0709095	0.138685	0.5113	0.609141	0.77754
MINOS1	26.7366	-0.345996	0.136747	-2.53019	0.0114002	0.0748158
NBL1	2.14978	-0.0365464	0.477467	-0.0765422	0.938988	0.970437
TMCO4	1.47934	0.854425	0.418142	2.04338	0.0410147	NA
OTUD3	2.65508	0.840765	0.420752	1.99824	0.0456905	0.175329
UBXN10-AS1	0.289918	0.079118	0.515939	0.153348	0.878124	NA
UBXN10	0.0895419	0.522828	1.58234	0.330415	0.741086	NA
CAMK2N1	0.923217	0.120996	0.437178	0.276767	0.781959	NA
MUL1	1.61033	0.143181	0.397017	0.360642	0.718367	NA
CDA	0.382279	0.998359	0.494163	2.0203	0.043352	NA
PINK1	1.33299	-0.0734318	0.399065	-0.18401	0.854006	NA
PINK1-AS	0.338223	0.592258	0.52573	1.12654	0.259935	NA
DDOST	15.3147	-0.317024	0.178572	-1.77532	0.0758449	0.236413
HP1BP3	28.5177	0.48061	0.173483	2.77036	0.00559944	0.048939
EIF4G3	4.51305	0.407605	0.320564	1.27153	0.203542	0.424745
ECE1	5.12146	-0.551144	0.286819	-1.92157	0.0546597	0.195859
RP5-1071N3.1	0.177693	0.640627	0.64579	0.992006	0.321195	NA
NBPF3	0.294203	0.580213	0.568084	1.02135	0.307089	NA
USP48	12.0025	0.619435	0.229396	2.70029	0.00692793	0.0563949
HSPG2	0.0966726	0.53224	1.02992	0.516776	0.605313	NA
RP1-224A6.3	0.0650418	0.878738	1.18368	0.742376	0.457859	NA
LINC00339	1.15664	0.218399	0.4639	0.470788	0.637792	NA
CDC42	82.1086	0.442091	0.106605	4.14701	3.3684e-05	0.00164695
WNT4	0.00943484	0	5.84738	0	1	NA
ZBTB40	3.07456	1.06961	0.396797	2.69561	0.00702588	0.056915
C1QA	0.146472	0.90723	1.02641	0.883885	0.376758	NA
C1QB	0.108464	0.545317	1.73306	0.314655	0.753023	NA
EPHB2	0.00156995	0	5.84737	0	1	NA
KDM1A	3.24948	0.336047	0.330143	1.01788	0.308734	0.535402
LUZP1	5.30398	0.010239	0.31751	0.0322479	0.974274	0.987813
RP5-1057J7.6	0.814016	0.432867	0.535696	0.808046	0.419064	NA
HNRNPR	21.6145	0.0142832	0.161328	0.0885351	0.929451	0.965315
ZNF436	0.241102	0.6357	0.535176	1.18783	0.234899	NA
C1orf213	0.276213	0.642176	0.581211	1.10489	0.269206	NA
TCEA3	1.93302	0.202874	0.469928	0.431713	0.66595	0.816323
E2F2	0.308522	0.356977	0.756169	0.472086	0.636865	NA
ID3	23.1261	-0.507925	0.228746	-2.22047	0.0263867	0.124842
MDS2	1.36923	0.559024	0.447901	1.2481	0.211996	NA
RPL11	1549.18	-0.0264188	0.0255622	-1.03351	0.301364	0.527155
TCEB3	6.50219	0.309952	0.237522	1.30494	0.191914	0.410934
RP5-886K2.3	0.651574	0.968575	0.454268	2.13217	0.0329931	NA
PITHD1	9.10971	0.13475	0.202651	0.664938	0.50609	0.705792
LYPLA2	4.2082	0.0433502	0.285634	0.151769	0.879369	0.940025
GALE	0.748495	-0.136566	0.468716	-0.291361	0.770775	NA
HMGCL	1.84227	0.387882	0.395001	0.981979	0.32611	NA
FUCA1	1.03646	0.206942	0.439931	0.470396	0.638072	NA
CNR2	2.96544	1.23856	0.431826	2.86818	0.00412839	0.0404243
PNRC2	4.65876	1.30017	0.366795	3.54467	0.000393098	0.00881901
SRSF10	17.8451	0.754651	0.188116	4.01164	6.02995e-05	0.00247328
IFNLR1	0.888039	-0.128219	0.457357	-0.280347	0.779211	NA
STPG1	1.92997	0.784601	0.462465	1.69656	0.089779	0.262487
NIPAL3	5.77526	0.552516	0.3177	1.73911	0.0820152	0.248367
RCAN3	24.8843	0.124009	0.212155	0.584523	0.558868	0.743848
RP4-594I10.3	1.64653	0.738572	0.451157	1.63706	0.101618	NA
SRRM1	57.8861	0.445674	0.120488	3.69891	0.000216524	0.00592073
CLIC4	4.53128	-0.200137	0.295977	-0.676191	0.498919	0.698961
RUNX3	18.2294	-0.39191	0.183351	-2.13748	0.0325586	0.142769
SYF2	47.2979	0.32369	0.0969931	3.33724	0.000846136	0.0141016
C1orf63	87.664	0.883559	0.146153	6.04545	1.48989e-09	5.15184e-07
RP3-465N24.6	0.126987	0.805864	0.831718	0.968915	0.332587	NA
TMEM50A	20.06	0.150264	0.157836	0.952021	0.341086	0.56605
TMEM57	5.64102	0.295177	0.272825	1.08193	0.279283	0.507814
LDLRAP1	6.15224	0.414647	0.376954	1.09999	0.271335	0.499604
RP11-70P17.1	0.35095	0.0997621	0.480943	0.20743	0.835674	NA
MAN1C1	1.05941	0.113042	0.456011	0.247893	0.804217	NA
RP1-187B23.1	2.52868	0.627822	0.486171	1.29136	0.196578	0.415142
SEPN1	1.00853	0.848249	0.42864	1.97893	0.0478239	NA
MTFR1L	2.43132	0.270937	0.36704	0.738169	0.460412	0.669024
PAQR7	0.470362	0.90288	0.488413	1.8486	0.0645159	NA
STMN1	7.83805	0.0265591	0.225361	0.117851	0.906185	0.954883
PAFAH2	0.493836	0.31172	0.498361	0.62549	0.53165	NA
PDIK1L	1.3657	0.725104	0.418212	1.73382	0.0829499	NA
ZNF593	7.3911	-0.265055	0.209896	-1.26279	0.206664	0.428475
CNKSR1	0.757441	0.526989	0.566231	0.930698	0.35201	NA
CEP85	0.536514	0.676452	0.500665	1.35111	0.176661	NA
SH3BGRL3	117.913	-0.0576415	0.10951	-0.526357	0.59864	0.770016
UBXN11	3.64191	0.818258	0.360187	2.27176	0.0231009	0.115648
CD52	339.821	0.334326	0.118349	2.82491	0.00472934	0.0434288
AIM1L	0.11778	0.533603	0.74997	0.7115	0.476775	NA
ZNF683	0.154496	0.495236	0.622513	0.795544	0.426297	NA
DHDDS	3.16322	-0.178942	0.357109	-0.501084	0.616312	0.782899
HMGN2	59.9881	0.259014	0.108376	2.38996	0.0168504	0.0948529
RPS6KA1	3.56059	-0.274452	0.344296	-0.79714	0.42537	0.641362
ARID1A	8.65427	0.786213	0.249038	3.157	0.001594	0.0220384
PIGV	0.662148	0.824917	0.490059	1.6833	0.0923165	NA
ZDHHC18	2.91007	-0.178702	0.372858	-0.479277	0.631742	0.792145
GPN2	2.20889	-0.410794	0.344495	-1.19245	0.233084	0.460369
GPATCH3	1.81656	-0.333385	0.32975	-1.01102	0.312005	NA
NUDC	13.5862	-0.143566	0.163665	-0.877195	0.380381	0.603427
C1orf172	0.125763	0.532124	0.643049	0.827502	0.407952	NA
TRNP1	0.0133453	0	2.64416	0	1	NA
SLC9A1	0.651146	0.122137	0.443671	0.275288	0.783095	NA
WDTC1	2.4849	0.239016	0.343892	0.695032	0.487035	0.69075
TMEM222	3.79798	0.109917	0.291249	0.377398	0.705878	0.842114
SYTL1	13.993	0.328756	0.191345	1.71813	0.0857733	0.254937
MAP3K6	0.665621	0.93465	0.488103	1.91486	0.05551	NA
WASF2	31.6246	0.307481	0.136632	2.25043	0.0244217	0.119425
RP1-159A19.4	0.0931713	0	0.76654	0	1	NA
AHDC1	0.932434	0.369442	0.43144	0.8563	0.391832	NA
FGR	4.43206	0.776408	0.291197	2.66626	0.00766998	0.0598099
IFI6	10.4261	-0.437552	0.292356	-1.49664	0.134486	0.331444
FAM76A	6.32299	0.0167389	0.253859	0.0659378	0.947427	0.974485
STX12	6.30869	0.300164	0.231012	1.29935	0.193825	0.412632
PPP1R8	3.62761	-0.308011	0.288079	-1.06919	0.284985	0.513976
THEMIS2	5.89555	0.0574097	0.276131	0.207908	0.835301	0.917166
RPA2	8.56794	-0.177316	0.213641	-0.829973	0.406554	0.62494
XKR8	0.969571	0.374479	0.446045	0.839555	0.401158	NA
EYA3	2.68989	0.126951	0.370915	0.342265	0.732152	0.857196
PTAFR	0.58078	0.233909	0.502553	0.465441	0.641616	NA
DNAJC8	22.3211	0.0876108	0.144535	0.606158	0.54441	0.733247
ATPIF1	33.3846	0.452842	0.145429	3.11383	0.00184677	0.0243465
RP5-1092A3.4	0.662721	0.36004	0.46808	0.769185	0.441784	NA
SESN2	2.98774	-0.139872	0.387328	-0.361121	0.718009	0.848455
MED18	0.842629	0.501331	0.447942	1.11919	0.26306	NA
PHACTR4	8.20741	0.674846	0.252672	2.67083	0.00756628	0.0594564
RCC1	1.79749	-0.101058	0.349931	-0.288793	0.77274	NA
TRNAU1AP	5.01086	-0.539131	0.263943	-2.0426	0.0410917	0.164968
SNHG12	14.1407	0.237014	0.181181	1.30816	0.190819	0.408944
TAF12	5.84317	-0.129855	0.233059	-0.557176	0.577407	0.755405
RNU11	2.04554	0.559538	0.554332	1.00939	0.312787	0.538928
GMEB1	3.16953	-0.140837	0.298155	-0.472363	0.636668	0.794861
YTHDF2	12.07	0.156299	0.165807	0.942657	0.345856	0.571243
EPB41	21.2048	0.490247	0.233159	2.10263	0.0354978	0.149932
SRSF4	14.2606	0.14204	0.216656	0.655602	0.51208	0.709588
RP11-242O24.5	0.017135	0	2.58935	0	1	NA
MECR	1.10739	0.260161	0.401963	0.647227	0.517485	NA
MATN1	0.2767	0.410862	0.649404	0.632676	0.526945	NA
MATN1-AS1	1.18412	0.0964467	0.37684	0.255935	0.798001	NA
LAPTM5	134.37	0.105994	0.092155	1.15017	0.250074	0.47711
SDC3	0.075501	0.642027	2.00493	0.320225	0.748798	NA
PUM1	11.1133	0.396346	0.230659	1.71832	0.0857387	0.254937
SNRNP40	5.23313	-0.135085	0.22374	-0.603759	0.546004	0.734045
ZCCHC17	5.2212	0.430028	0.270805	1.58796	0.112295	0.298335
SERINC2	0.0395972	0.68352	2.25423	0.303216	0.761725	NA
RP11-439L8.4	0.00123853	0	5.84737	0	1	NA
TINAGL1	0.000756936	0	5.84738	0	1	NA
PEF1	4.62207	-0.0458549	0.242209	-0.18932	0.849842	0.924739
RP11-73M7.9	0.0669129	0.819427	1.21328	0.675383	0.499432	NA
SPOCD1	0.0112113	0.804137	4.8455	0.165955	0.868192	NA
RP11-84A19.2	0.12451	0.504629	0.776221	0.65011	0.515621	NA
RP11-84A19.4	0.0848083	0.740639	0.891226	0.831034	0.405955	NA
PTP4A2	38.876	0.367171	0.149923	2.44906	0.014323	0.086183
KHDRBS1	26.8076	0.227504	0.134204	1.6952	0.0900372	0.262745
RP11-277A4.4	0.0365202	0.748414	1.36504	0.548271	0.583506	NA
TMEM39B	1.99283	0.356325	0.333681	1.06786	0.285583	0.51451
KPNA6	7.25652	0.444282	0.235482	1.88669	0.0592014	0.204723
TXLNA	3.08924	0.50991	0.327296	1.55794	0.119247	0.309454
CCDC28B	2.06395	0.344737	0.359785	0.958176	0.337974	0.562376
IQCC	0.217597	0.491065	0.601083	0.816968	0.413947	NA
TMEM234	0.86986	0.0327518	0.444947	0.0736084	0.941322	NA
EIF3I	21.3064	-0.178817	0.122222	-1.46305	0.143454	0.344766
FAM167B	0.13434	0.736872	0.691128	1.06619	0.286338	NA
LCK	16.3248	0.749921	0.337575	2.22149	0.0263176	0.124713
HDAC1	9.2568	0.344462	0.223049	1.54433	0.122509	0.313631
MARCKSL1	19.5817	0.324003	0.18425	1.7585	0.078663	0.242189
FAM229A	0.667805	0.54108	0.462777	1.1692	0.242323	NA
BSDC1	13.0993	0.515603	0.205067	2.51432	0.0119263	0.0767673
ZBTB8A	0.183021	0.419644	0.631531	0.664487	0.506379	NA
ZBTB8OS	10.0201	0.232395	0.205734	1.12959	0.25865	0.486155
RBBP4	15.1964	0.456728	0.187292	2.43858	0.0147451	0.0872998
SYNC	3.60997	0.336512	0.293506	1.14652	0.251579	0.47891
KIAA1522	0.0219416	0	1.53628	0	1	NA
YARS	3.4946	0.234231	0.323795	0.723394	0.469438	0.67587
S100PBP	3.74107	0.98365	0.368	2.67296	0.00751852	0.0591782
RNF19B	1.53623	-0.18113	0.376417	-0.481196	0.630377	NA
AK2	4.34001	0.158139	0.266681	0.592989	0.553189	0.739354
ADC	0.226236	0.659919	0.523588	1.26038	0.207532	NA
TRIM62	0.664995	0.125736	0.481108	0.261347	0.793825	NA
ZNF362	0.990678	0.725384	0.430424	1.68528	0.0919348	NA
PHC2	1.94811	0.849126	0.370949	2.28906	0.0220758	0.112326
SMIM12	6.10485	-0.356801	0.237858	-1.50006	0.1336	0.329999
DLGAP3	0.191526	0.635684	0.625556	1.01619	0.309539	NA
RP11-244H3.4	0.456462	1.03651	0.512247	2.02346	0.0430255	NA
ZMYM6	2.86717	0.291785	0.371437	0.785557	0.432127	0.646877
ZMYM1	1.45181	0.849769	0.454023	1.87164	0.0612562	NA
SFPQ	56.8284	0.517206	0.13999	3.69459	0.000220243	0.00600019
ZMYM4	3.98178	-0.102629	0.375137	-0.273579	0.784409	0.887819
KIAA0319L	3.89935	0.61988	0.325453	1.90467	0.0568231	0.200251
NCDN	0.502805	0.385096	0.483438	0.796576	0.425697	NA
RP4-728D4.2	1.62972	0.362046	0.418606	0.864885	0.387102	NA
PSMB2	10.7617	-0.381426	0.176915	-2.15598	0.0310851	0.13926
C1orf216	0.689513	0.172816	0.455443	0.379445	0.704357	NA
CLSPN	0.512489	-0.105302	0.477242	-0.220646	0.825368	NA
AGO4	1.51855	0.718631	0.420434	1.70926	0.0874026	NA
AGO1	2.84041	-0.160509	0.357443	-0.449049	0.653396	0.806154
RP4-789D17.5	0.019647	0	2.08292	0	1	NA
AGO3	8.28443	0.508249	0.262597	1.93547	0.0529327	0.192135
ADPRHL2	4.10504	-0.695682	0.257727	-2.6993	0.00694859	0.0564994
TRAPPC3	8.93212	-0.247168	0.190343	-1.29854	0.194102	0.412746
MAP7D1	6.19978	-0.343727	0.258535	-1.32952	0.183677	0.399554
THRAP3	24.8376	0.138636	0.155106	0.893814	0.371421	0.59509
SH3D21	0.147495	0.711948	0.815129	0.873418	0.382435	NA
EVA1B	0.694664	-0.245333	0.452742	-0.541882	0.5879	NA
STK40	3.12988	-0.373904	0.308671	-1.21134	0.225766	0.451716
LSM10	11.2748	0.211704	0.179549	1.17908	0.238366	0.465693
OSCP1	0.0424348	0.660828	1.38601	0.476784	0.633516	NA
MRPS15	12.1521	-0.145633	0.156442	-0.930905	0.351903	0.577395
CSF3R	1.22511	0.733172	0.43181	1.6979	0.0895262	NA
LINC01137	0.285854	0.509404	0.520788	0.97814	0.328005	NA
ZC3H12A	6.87818	-0.0714607	0.241495	-0.29591	0.767299	0.878153
MEAF6	14.7843	0.255732	0.166584	1.53515	0.124747	0.317369
SNIP1	3.82995	0.895622	0.298396	3.00146	0.00268689	0.0303323
GNL2	5.74006	-0.457804	0.253663	-1.80477	0.0711109	0.228587
C1orf109	2.83708	0.629618	0.332866	1.8915	0.0585572	0.203162
CDCA8	0.155164	0.754573	0.836434	0.90213	0.366988	NA
YRDC	4.53746	0.023693	0.259363	0.0913508	0.927214	0.964579
C1orf122	7.19478	-0.0737241	0.210457	-0.350304	0.726111	0.853507
MTF1	2.80641	-0.0688014	0.318446	-0.216053	0.828946	0.913101
INPP5B	1.89888	0.326345	0.412424	0.791284	0.428778	NA
SF3A3	5.629	0.450594	0.271938	1.65697	0.0975247	0.275134
FHL3	0.600524	0.123001	0.470193	0.261596	0.793633	NA
UTP11L	3.78278	-0.274231	0.270876	-1.01239	0.311353	0.537497
POU3F1	2.0251	0.210547	0.485656	0.433532	0.664628	0.815108
RRAGC	6.53365	0.00520738	0.223252	0.0233252	0.981391	0.991598
RP5-864K19.4	0.232564	0.662068	0.685912	0.965238	0.334426	NA
MYCBP	2.81633	0.490185	0.333562	1.46955	0.141684	0.34196
AKIRIN1	19.4129	0.265425	0.158182	1.67796	0.093354	0.268497
NDUFS5	58.2133	-0.125989	0.110115	-1.14416	0.252558	0.480032
MACF1	26.4903	1.30092	0.290207	4.48273	7.36953e-06	0.000555196
KIAA0754	0.72947	0.0519329	0.505101	0.102817	0.918108	NA
RP11-69E11.4	0.584334	0.132082	0.500783	0.26375	0.791972	NA
PABPC4	25.4815	-0.0787428	0.147222	-0.534856	0.592749	0.766556
HPCAL4	1.06136	0.323519	0.490701	0.659299	0.509704	NA
PPIE	5.78296	0.10793	0.252289	0.427802	0.668795	0.818513
BMP8B	0.981672	0.445181	0.745545	0.597122	0.550426	NA
OXCT2	0.257825	0.85483	1.32619	0.644578	0.519201	NA
TRIT1	1.11329	0.603027	0.417034	1.44599	0.14818	NA
MYCL	0.0209555	0.793708	3.36032	0.2362	0.813278	NA
MFSD2A	0.377103	0.123834	0.494613	0.250365	0.802305	NA
CAP1	22.9149	0.145879	0.176419	0.826888	0.408301	0.626842
PPT1	5.98351	0.519663	0.251288	2.06799	0.0386408	0.158542
RLF	8.43317	0.937756	0.264608	3.54395	0.000394186	0.00881901
RP1-39G22.7	0.770533	0.384991	0.472251	0.815226	0.414943	NA
ZMPSTE24	2.40763	0.60292	0.361771	1.66658	0.095598	0.272089
COL9A2	0.761086	0.322841	0.427902	0.754475	0.450564	NA
SMAP2	45.6995	-0.0272589	0.141812	-0.192218	0.847571	0.924453
ZFP69B	0.485587	0.107306	0.517794	0.207237	0.835824	NA
ZFP69	0.395622	0.657321	0.573112	1.14693	0.251409	NA
RP11-656D10.3	0.178186	0.760936	0.623471	1.22048	0.222281	NA
EXO5	0.591424	0.487205	0.473207	1.02958	0.303207	NA
ZNF684	0.710541	0.556497	0.43885	1.26808	0.20477	NA
NFYC-AS1	0.747077	0.778214	0.464603	1.67501	0.0939323	NA
NFYC	3.8769	0.248101	0.286328	0.866495	0.386219	0.607728
CITED4	1.76342	0.595556	0.459761	1.29536	0.195196	NA
CTPS1	2.22315	0.223389	0.362973	0.615441	0.538263	0.729314
SCMH1	1.11448	0.42198	0.406775	1.03738	0.29956	NA
HIVEP3	2.41789	-0.110168	0.396807	-0.277637	0.781291	0.886142
FOXJ3	5.68287	1.05494	0.312953	3.37091	0.000749191	0.0131384
PPCS	12.0258	0.206774	0.176263	1.1731	0.240757	0.468506
CCDC30	0.722693	0.768394	0.486671	1.57888	0.114364	NA
PPIH	3.91587	0.110822	0.259092	0.427732	0.668846	0.818513
YBX1	177.29	-0.125406	0.0777046	-1.61389	0.106552	0.288476
LEPRE1	1.91258	-0.448903	0.374068	-1.20006	0.230118	NA
C1orf50	3.38174	0.200244	0.306355	0.653632	0.513349	0.710546
CCDC23	5.70928	-0.00148731	0.22459	-0.00662236	0.994716	0.996251
ERMAP	0.389405	0.129509	0.481219	0.269126	0.787833	NA
RP11-342M1.3	0.0473913	0.581147	1.24961	0.465062	0.641887	NA
ZNF691	0.311351	0.293392	0.564163	0.520047	0.603031	NA
SLC2A1	3.43703	0.15043	0.260747	0.576918	0.563995	0.748109
SLC2A1-AS1	0.211139	0.454043	0.601115	0.755334	0.450049	NA
FAM183A	0	NA	NA	NA	NA	NA
EBNA1BP2	4.81837	-0.379472	0.269383	-1.40867	0.158932	0.367006
TIE1	0.00978994	0	5.8474	0	1	NA
RP1-92O14.3	0.0752363	0.712141	0.758555	0.938812	0.347827	NA
CDC20	0.11081	0.641283	1.17465	0.545937	0.585109	NA
ELOVL1	2.89804	0.13604	0.301461	0.451269	0.651795	0.804774
MED8	3.3309	-0.213693	0.265048	-0.806241	0.420104	0.637015
SZT2	2.07098	0.229575	0.397793	0.577121	0.563858	0.748109
HYI	2.09797	0.7873	0.372413	2.11405	0.0345109	0.147862
PTPRF	0.0636948	0.876456	2.38663	0.367235	0.713444	NA
KDM4A	1.74586	0.84769	0.435567	1.94618	0.0516336	NA
KDM4A-AS1	0.208907	0.577159	0.546624	1.05586	0.291031	NA
ST3GAL3	0.586786	0.385904	0.457513	0.843482	0.398959	NA
IPO13	0.505285	0.176244	0.47453	0.371407	0.710334	NA
DPH2	1.59748	0.193915	0.382442	0.507044	0.612124	NA
ATP6V0B	23.5941	0.173573	0.145446	1.19339	0.232718	0.459892
B4GALT2	0.295973	0.470333	0.916656	0.513096	0.607884	NA
CCDC24	0.254125	0.541573	1.00946	0.536499	0.591614	NA
DMAP1	4.68632	0.229353	0.291199	0.787617	0.430921	0.645463
ERI3	2.92211	-0.109929	0.291688	-0.376873	0.706268	0.842114
RNF220	4.96058	0.591681	0.276611	2.13904	0.0324324	0.142614
TMEM53	0.384491	0.83164	0.514494	1.61642	0.106003	NA
C1orf228	6.6191	-0.0978745	0.289196	-0.338436	0.735035	0.858711
KIF2C	0.0327054	0.584457	1.61385	0.362151	0.71724	NA
RPS8	1574.17	0.0841136	0.0338992	2.48129	0.0130909	0.0814236
PLK3	20.1631	-0.169578	0.199413	-0.850387	0.39511	0.615035
TCTEX1D4	0.0630275	0	0.818949	0	1	NA
BTBD19	0.655489	0.169637	0.479583	0.353717	0.723551	NA
PTCH2	1.16168	0.895716	0.492195	1.81984	0.0687838	NA
EIF2B3	1.90203	0.213265	0.385724	0.552896	0.580335	NA
HECTD3	1.21621	0.537095	0.455057	1.18028	0.237889	NA
UROD	2.62513	-0.021073	0.32873	-0.0641044	0.948887	0.974884
MUTYH	1.9105	0.346122	0.355049	0.974859	0.32963	NA
TOE1	2.91083	0.0167023	0.298551	0.0559444	0.955386	0.977877
TESK2	1.49642	0.441789	0.359886	1.22758	0.219605	NA
CCDC163P	0.423952	0.663585	0.590729	1.12333	0.261296	NA
PRDX1	26.3023	-0.537639	0.16609	-3.23704	0.00120776	0.0181977
AKR1A1	11.2062	-0.194726	0.171847	-1.13314	0.257157	0.484787
NASP	20.5244	0.525124	0.174263	3.01339	0.00258343	0.0296172
CCDC17	0.164054	0.630102	0.623203	1.01107	0.311983	NA
GPBP1L1	9.63991	0.382208	0.207431	1.84258	0.0653911	0.216494
TMEM69	1.92509	0.277222	0.368194	0.752925	0.451495	0.661912
IPP	1.33475	0.412404	0.443463	0.929962	0.352391	NA
MAST2	0.432712	0.767735	0.498742	1.53934	0.12372	NA
PIK3R3	0.216767	-0.0244532	0.648026	-0.0377349	0.969899	NA
TSPAN1	0.0236008	0	5.35141	0	1	NA
POMGNT1	1.84522	1.13358	0.408017	2.77828	0.00546482	NA
RAD54L	0.0182731	0.810377	5.84732	0.138589	0.889775	NA
LRRC41	3.31594	-0.298882	0.294099	-1.01627	0.309503	0.535616
UQCRH	79.7135	-0.0130047	0.087788	-0.148137	0.882234	0.941262
NSUN4	2.22868	0.190213	0.339253	0.560682	0.575015	0.754706
FAAH	0.169321	0.302975	0.552084	0.548784	0.583153	NA
MKNK1	3.76916	0.914174	0.339202	2.69507	0.00703734	0.056915
MOB3C	0.737212	0.261837	0.442175	0.592157	0.553745	NA
ATPAF1	2.92521	0.664317	0.330364	2.01086	0.0443398	0.171988
EFCAB14	10.6904	0.187	0.235061	0.795538	0.4263	0.641928
CYP4B1	0.0102007	0	3.83196	0	1	NA
LINC00853	0.024533	0	1.9893	0	1	NA
PDZK1IP1	0.0991374	0.693173	0.832057	0.833084	0.404798	NA
TAL1	0.0805582	0.807684	1.32405	0.610011	0.541854	NA
STIL	0.126955	0.434179	0.761218	0.570374	0.568424	NA
CMPK1	40.112	0.118712	0.136126	0.872077	0.383166	0.6053
RP11-511I2.2	0.0307209	0.602143	3.46857	0.1736	0.86218	NA
FOXD2-AS1	0.0871099	0.619987	0.762814	0.812763	0.416354	NA
FOXD2	0.0705798	0.729165	0.902171	0.808234	0.418956	NA
SPATA6	0.447704	0.285035	0.476796	0.597812	0.549965	NA
BEND5	1.29182	1.15758	0.42459	2.72634	0.00640411	NA
RP5-850O15.4	0.108463	0.924466	0.968704	0.954333	0.339915	NA
FAF1	3.74657	0.350987	0.280124	1.25297	0.210217	0.432804
CDKN2C	0.701529	-0.758322	0.436485	-1.73734	0.0823273	NA
RNF11	8.13378	0.325959	0.249002	1.30906	0.190513	0.408409
TTC39A	0.0555349	0.745962	1.13932	0.654744	0.512633	NA
EPS15	11.7817	0.340488	0.210173	1.62004	0.105225	0.286096
OSBPL9	6.26834	0.293297	0.239137	1.22648	0.220018	0.443823
NRD1	13.0755	0.544901	0.228629	2.38334	0.0171563	0.0956992
RP4-657D16.3	0.15018	0.441856	0.769722	0.574046	0.565937	NA
RAB3B	0.112319	0.602	0.673199	0.894237	0.371195	NA
TXNDC12	7.71119	-0.221048	0.203474	-1.08637	0.277317	0.506164
KTI12	3.08579	-0.153672	0.282998	-0.543014	0.58712	0.762213
BTF3L4	12.43	-0.00975601	0.170667	-0.0571641	0.954414	0.977451
ZFYVE9	0.47774	0.259718	0.539158	0.481711	0.630011	NA
CC2D1B	1.79461	-0.177166	0.3977	-0.445476	0.655976	NA
ORC1	0.115647	0.47079	0.948657	0.49627	0.619704	NA
PRPF38A	11.4729	0.124743	0.190081	0.656264	0.511654	0.709398
ZCCHC11	33.3734	0.602502	0.182119	3.30829	0.000938673	0.0150548
GPX7	2.57589	-0.653834	0.305502	-2.14019	0.0323392	0.142584
FAM159A	4.76526	-0.0506718	0.255305	-0.198476	0.842673	0.921306
COA7	0.536262	0.198734	0.494685	0.401738	0.687877	NA
ZYG11B	2.90526	0.639948	0.36489	1.75381	0.0794629	0.243485
ECHDC2	4.07156	0.442018	0.349654	1.26416	0.206172	0.427936
SCP2	14.9812	0.205683	0.172316	1.19364	0.232619	0.459892
SLC1A7	0.0209207	0	2.8305	0	1	NA
CPT2	0.95506	0.305174	0.413727	0.737622	0.460744	NA
C1orf123	4.27053	-0.165156	0.264503	-0.624402	0.532364	0.724773
RP5-1024G6.7	0.230366	0.404608	0.479573	0.843684	0.398846	NA
MAGOH	15.9078	0.0517916	0.151629	0.341568	0.732676	0.857504
RP5-1024G6.8	0.135793	0.633725	0.823089	0.769935	0.441338	NA
LRP8	0.390834	0.623009	0.540506	1.15264	0.249059	NA
RP11-117D22.2	0.628289	0.890956	0.579697	1.53693	0.124309	NA
NDC1	0.872991	-0.502363	0.433499	-1.15886	0.246515	NA
YIPF1	1.45356	-0.0857672	0.370927	-0.231224	0.817141	NA
HSPB11	8.74999	0.140665	0.207425	0.678151	0.497676	0.698279
LRRC42	0.698407	0.0570125	0.44763	0.127365	0.898651	NA
RP4-758J24.5	0.124329	0.664753	0.714997	0.929728	0.352512	NA
TMEM59	30.3903	0.0231113	0.13377	0.172769	0.862833	0.930799
TCEANC2	1.16503	0.114526	0.465711	0.245916	0.805747	NA
CYB5RL	0.483237	0.613947	0.607549	1.01053	0.312241	NA
MRPL37	3.92596	-0.556231	0.249081	-2.23313	0.0255402	0.122285
SSBP3	3.08591	0.152059	0.353983	0.429567	0.667511	0.817557
ACOT11	0.0610277	0	0.956447	0	1	NA
TTC4	0.67243	0.840614	0.457988	1.83545	0.0664391	NA
TTC22	0.322538	0.419936	0.503738	0.83364	0.404484	NA
C1orf177	0.00834096	0	4.58454	0	1	NA
USP24	6.26785	0.158116	0.32521	0.486198	0.626827	0.788795
OMA1	3.18781	0.415799	0.348347	1.19364	0.23262	0.459892
TACSTD2	0.0362914	0.794416	2.27666	0.348939	0.727135	NA
MYSM1	5.85676	0.613027	0.315773	1.94136	0.0522152	0.190769
JUN	177.445	0.81729	0.220864	3.70042	0.000215246	0.00590783
RP4-794H19.1	0.0468691	0.612075	2.81334	0.217562	0.827771	NA
FGGY	0.654804	0.0886704	0.448583	0.197668	0.843305	NA
HOOK1	1.79094	0.96602	0.431171	2.24046	0.0250612	NA
NFIA	0.850506	0.228346	0.480342	0.475381	0.634515	NA
TM2D1	8.99804	0.177533	0.228634	0.776494	0.437457	0.651553
RP11-430G17.3	0.138081	0.607765	0.781721	0.77747	0.436881	NA
INADL	4.75193	0.859435	0.37034	2.32066	0.0203051	0.10617
L1TD1	0.232578	0.908627	0.981814	0.925457	0.354728	NA
USP1	10.2201	0.146574	0.205999	0.711527	0.476758	0.681623
DOCK7	0.697155	0.392512	0.50726	0.77379	0.439055	NA
ATG4C	2.3423	0.424465	0.31319	1.35529	0.175324	0.388565
ALG6	1.74249	0.047965	0.397503	0.120666	0.903956	NA
ITGB3BP	4.54835	0.10497	0.267557	0.392326	0.694818	0.83602
EFCAB7	1.09788	1.1634	0.454096	2.56201	0.0104069	NA
DLEU2L	0.539847	0.753327	0.502932	1.49787	0.134167	NA
PGM1	1.8334	-0.382632	0.36042	-1.06163	0.288404	NA
RAVER2	0.212999	0.287936	0.693287	0.41532	0.677908	NA
JAK1	47.0377	0.329828	0.150051	2.1981	0.027942	0.130485
RP4-535B20.1	0.0219775	0	3.82469	0	1	NA
AK4	0.076625	0.798768	1.02273	0.781017	0.434792	NA
DNAJC6	0.0686859	0.516396	0.896495	0.576016	0.564604	NA
LEPR	0.242028	0.713885	0.626437	1.1396	0.254454	NA
LEPROT	4.71036	0.506538	0.312466	1.6211	0.104996	0.285837
PDE4B	26.453	0.0904537	0.177798	0.508743	0.610932	0.778749
SGIP1	0.00206308	0	5.84737	0	1	NA
TCTEX1D1	0	NA	NA	NA	NA	NA
WDR78	0.296537	0.744579	0.650144	1.14525	0.252105	NA
MIER1	17.5906	0.384218	0.178975	2.14677	0.0318118	0.141316
SLC35D1	1.79494	0.335813	0.391428	0.857917	0.390938	NA
IL23R	0.0672877	0.567813	1.10996	0.511561	0.608958	NA
IL12RB2	0.114019	0.553409	0.821008	0.674061	0.500273	NA
SERBP1	51.8902	-0.0917043	0.11206	-0.81835	0.413157	0.631671
GADD45A	11.1802	0.311656	0.300071	1.03861	0.298987	0.524953
WLS	0.0377662	0.571019	2.37155	0.240779	0.809726	NA
DEPDC1	0.00462483	0	5.84735	0	1	NA
LRRC40	2.67537	0.688172	0.345884	1.98961	0.0466343	0.17821
SRSF11	39.0957	0.477499	0.165716	2.88144	0.00395868	0.0394959
ANKRD13C	3.55875	0.550818	0.307921	1.78883	0.0736422	0.232527
HHLA3	0.835208	0.658005	0.46191	1.42453	0.154293	NA
CTH	1.35738	-0.130257	0.510579	-0.255117	0.798633	NA
ZRANB2	24.2942	0.597288	0.188401	3.17029	0.00152285	0.0214565
NEGR1	0.00772974	0	5.84737	0	1	NA
LRRIQ3	0.353788	0.524975	0.531331	0.988038	0.323134	NA
FPGT	0.482763	0.526584	0.482865	1.09054	0.275475	NA
FPGT-TNNI3K	0.0819922	0.448641	0.984846	0.455545	0.648718	NA
C1orf173	0.0451477	0.790799	5.84727	0.135242	0.89242	NA
CRYZ	1.16103	-0.00725003	0.426102	-0.0170148	0.986425	NA
TYW3	5.4451	0.0651761	0.237492	0.274435	0.783751	0.887489
ACADM	6.76596	0.0224059	0.241166	0.0929068	0.925978	0.964579
RABGGTB	12.4616	0.688541	0.184072	3.74061	0.000183571	0.00527356
ST6GALNAC3	0.370274	0.471516	0.624124	0.755484	0.449958	NA
PIGK	2.45121	0.166814	0.355483	0.469259	0.638885	0.795854
AK5	1.88277	0.155618	0.469163	0.331693	0.740121	NA
ZZZ3	5.14039	0.579796	0.309551	1.87302	0.0610657	0.208448
USP33	6.65078	1.14462	0.309322	3.70041	0.000215252	0.00590783
FAM73A	3.42902	1.31404	0.372337	3.52916	0.000416879	0.00916017
NEXN	0.413751	0.310437	0.525285	0.590987	0.554529	NA
FUBP1	11.2726	0.351525	0.216002	1.62742	0.103648	0.285003
DNAJB4	2.38054	0.354272	0.367774	0.963288	0.335403	0.560625
RP11-386I14.4	4.52824	1.41951	0.351932	4.03347	5.49588e-05	0.00237287
IFI44L	4.9717	-0.58708	0.429409	-1.36718	0.171568	0.383569
IFI44	3.02965	-0.59465	0.430538	-1.38118	0.167224	0.379415
RP5-887A10.1	17.0158	0.106843	0.261783	0.408136	0.683174	0.828495
RP11-475O6.1	0.655001	0.888344	0.553397	1.60526	0.108437	NA
TTLL7	0.178386	0.832102	0.909738	0.914662	0.360369	NA
PRKACB	8.37057	0.647112	0.269538	2.40082	0.0163584	0.0933338
SAMD13	0.0251559	0.823561	2.79466	0.294691	0.76823	NA
RPF1	9.92929	0.298713	0.177102	1.68667	0.0916665	0.265837
GNG5	22.202	-0.639944	0.157661	-4.05899	4.92851e-05	0.00216591
CTBS	5.86382	0.202237	0.250517	0.807281	0.419504	0.636636
SSX2IP	0.970262	0.51167	0.462199	1.10703	0.268279	NA
LPAR3	0.0341427	0.631243	1.52211	0.414716	0.67835	NA
MCOLN2	2.27317	0.852516	0.439893	1.93801	0.052622	0.19172
WDR63	0.0318946	0	1.24241	0	1	NA
MCOLN3	0.411312	0.499517	0.52724	0.947419	0.343425	NA
SYDE2	0.592073	0.556863	0.472246	1.17918	0.238326	NA
C1orf52	8.82183	0.13778	0.195228	0.705738	0.480351	0.685106
BCL10	7.57568	0.514927	0.194419	2.64854	0.00808413	0.0617225
RP11-131L23.1	0.134741	0.655508	1.38893	0.471951	0.636962	NA
CYR61	0.0461249	0	5.84739	0	1	NA
ZNHIT6	7.04108	0.539257	0.287255	1.87728	0.0604802	0.207433
COL24A1	0.0646649	0.786467	3.08656	0.254804	0.798874	NA
ODF2L	19.1864	0.232547	0.193168	1.20386	0.228645	0.455256
CLCA2	0	NA	NA	NA	NA	NA
RP4-612B15.3	0.30939	0.611849	0.573324	1.0672	0.285884	NA
SH3GLB1	16.7865	0.287855	0.17554	1.63982	0.101042	0.281683
2024-09-15	29.5377	0.184059	0.125579	1.46568	0.142734	0.343708
HS2ST1	2.63173	0.572401	0.386527	1.48088	0.138639	0.337923
LMO4	11.0283	0.285909	0.21039	1.35895	0.174162	0.386834
PKN2	12.12	0.821801	0.230071	3.57195	0.000354329	0.00829671
GTF2B	17.4894	0.260442	0.223983	1.16278	0.24492	0.47225
CCBL2	3.15821	-0.0903554	0.336365	-0.268623	0.788219	0.889587
RBMXL1	3.47539	0.655665	0.310652	2.11061	0.034806	0.148282
GBP3	2.27627	-0.0766804	0.448324	-0.171038	0.864194	0.931287
GBP1	4.04835	-1.69158	0.412995	-4.09589	4.2055e-05	0.00193593
GBP2	9.36639	-0.813226	0.308743	-2.63399	0.00843868	0.0632171
GBP4	4.24769	-0.262817	0.352428	-0.745731	0.45583	0.665987
GBP5	5.30646	-0.659369	0.372831	-1.76855	0.0769697	0.238499
LRRC8B	2.5471	0.184504	0.353238	0.52232	0.601447	0.771856
RP5-1007M22.2	0.85473	-0.0357792	0.453983	-0.0788118	0.937182	NA
LRRC8C	5.36157	0.115046	0.392667	0.292985	0.769534	0.879756
RP5-943J3.2	0.275268	0.309368	0.645082	0.47958	0.631526	NA
LRRC8D	1.65281	0.751792	0.420609	1.78739	0.0738745	NA
ZNF326	9.69703	0.588648	0.213217	2.7608	0.00576608	0.0496165
ZNF644	19.8038	1.00565	0.20515	4.90205	9.48433e-07	0.000109411
CDC7	0.413246	0.401414	0.496737	0.808102	0.419032	NA
TGFBR3	1.8062	-0.394027	0.470335	-0.837757	0.402167	NA
BRDT	0.0269608	0	1.93627	0	1	NA
EPHX4	0.0178321	0	2.71807	0	1	NA
BTBD8	0.241886	0.499152	0.622779	0.801492	0.422847	NA
GLMN	2.93774	0.906156	0.369795	2.45043	0.0142687	0.0859264
RPAP2	7.31162	0.87146	0.339344	2.56807	0.0102266	0.0710596
GFI1	0.57212	0.606309	0.528204	1.14787	0.251023	NA
EVI5	2.15552	0.415654	0.312265	1.3311	0.183157	0.399128
RPL5	656.036	-0.163362	0.0432695	-3.77545	0.000159718	0.00483278
FAM69A	2.15144	0.498468	0.387234	1.28725	0.198006	0.416871
MTF2	11.7452	0.162672	0.190087	0.855773	0.392124	0.612449
TMED5	9.61343	0.194207	0.214138	0.906925	0.364447	0.589035
CCDC18	2.97354	0.343963	0.34597	0.9942	0.320126	0.547103
DR1	10.7818	0.0396688	0.209064	0.189745	0.849509	0.924739
FNBP1L	0.565993	0.359291	0.535939	0.670396	0.502605	NA
BCAR3	0.756127	-0.403877	0.605822	-0.66666	0.50499	NA
RP4-561L24.3	0.114136	0.624329	0.659773	0.946279	0.344006	NA
DNTTIP2	19.9961	0.214871	0.177684	1.20929	0.226552	0.452674
GCLM	3.46129	-0.230825	0.35509	-0.650047	0.515662	0.711215
ARHGAP29	0.0054125	0	5.30083	0	1	NA
ABCD3	2.04963	0.620667	0.36408	1.70475	0.0882402	0.259346
F3	0.173304	-0.250441	0.83727	-0.299116	0.764852	NA
CNN3	0.720969	-0.00651682	0.465586	-0.013997	0.988832	NA
ALG14	1.73292	0.400054	0.383682	1.04267	0.297101	NA
TMEM56	0.313382	0.1866	0.871346	0.214152	0.830429	NA
RWDD3	0.455207	0.272695	0.461187	0.591289	0.554327	NA
PTBP2	2.75617	0.405354	0.337262	1.2019	0.229403	0.45615
DPYD	3.66104	0.464559	0.408037	1.13852	0.254903	0.482428
SNX7	0.0380104	0.686829	1.36333	0.503788	0.61441	NA
FRRS1	0.112421	1.24444	1.8949	0.656731	0.511354	NA
AGL	4.44794	0.309902	0.323873	0.956863	0.338636	0.563351
SLC35A3	3.50517	0.135901	0.315758	0.430395	0.666908	0.81709
HIAT1	9.5219	0.51239	0.240025	2.13473	0.0327828	0.14335
SASS6	1.81499	0.632221	0.386903	1.63406	0.102247	NA
TRMT13	5.50729	0.170971	0.31768	0.538185	0.59045	0.76519
DBT	2.09279	0.793121	0.414488	1.9135	0.0556844	0.197938
RP11-305E17.6	0.024133	0.665546	1.58152	0.420826	0.673882	NA
RTCA	5.49602	0.0951634	0.238106	0.399668	0.689401	0.832314
CDC14A	7.46752	0.728291	0.382251	1.90527	0.056745	0.200166
EXTL2	0.78499	0.918988	0.426976	2.15232	0.0313725	NA
RP4-549L20.3	0.246345	0.341325	0.503758	0.677557	0.498052	NA
SLC30A7	9.3163	0.320455	0.263395	1.21663	0.223744	0.448765
DPH5	5.72805	0.291218	0.224954	1.29457	0.195469	0.414222
AC093157.1	0.443892	0.206663	0.501755	0.411881	0.680427	NA
RP11-421L21.2	0.2619	0.803601	0.546949	1.46924	0.141767	NA
RP11-421L21.3	1.925	0.474309	0.378204	1.25411	0.209803	0.432553
RP4-575N6.4	1.30907	0.560276	0.443209	1.26413	0.206182	NA
S1PR1	7.07175	0.00279363	0.293099	0.00953135	0.992395	0.995767
RNPC3	6.40269	0.845868	0.304937	2.77391	0.00553875	0.0486237
AMY2B	0.495798	0.591869	0.496423	1.19227	0.233156	NA
PRMT6	0.968932	0.848972	0.449741	1.88769	0.0590674	NA
VAV3	4.45439	1.14072	0.330943	3.44687	0.000567118	0.0111022
RP11-356N1.2	0.079641	0.775036	5.13205	0.151019	0.879961	NA
SLC25A24	3.47786	0.36984	0.337738	1.09505	0.273496	0.50142
FAM102B	1.75963	0.424655	0.404102	1.05086	0.293324	NA
HENMT1	1.64941	0.249237	0.417815	0.596525	0.550825	NA
PRPF38B	42.67	0.5401	0.157185	3.43608	0.000590186	0.0114366
STXBP3	6.82557	0.02245	0.263166	0.0853074	0.932017	0.967319
GPSM2	1.24932	0.226091	0.438609	0.515473	0.606223	NA
CLCC1	2.17873	0.556995	0.380966	1.46206	0.143725	0.345193
WDR47	2.6417	0.466328	0.388893	1.19912	0.230482	0.457647
TAF13	3.01484	0.123693	0.316103	0.391307	0.695571	0.836154
RP5-1065J22.8	0.711396	0.795094	0.440484	1.80505	0.0710675	NA
TMEM167B	7.53591	0.304777	0.219964	1.38557	0.165877	0.377453
SCARNA2	0.28675	0.337722	0.567683	0.594913	0.551901	NA
C1orf194	0.00881425	0.764991	3.87825	0.197252	0.84363	NA
KIAA1324	0.984022	0.0734544	0.499415	0.147081	0.883068	NA
SARS	11.6005	-0.0869733	0.211107	-0.411987	0.680349	0.82665
CELSR2	0.0734747	0.544989	0.735281	0.741198	0.458573	NA
PSRC1	0.0981982	0.832533	1.63602	0.508875	0.61084	NA
SORT1	0.108893	0.855353	0.823819	1.03828	0.299141	NA
PSMA5	12.9876	-0.644688	0.182835	-3.52607	0.000421782	0.00921308
ATXN7L2	0.572913	0.811019	0.48238	1.68129	0.0927069	NA
CYB561D1	1.12344	0.828486	0.451305	1.83576	0.0663934	NA
AMIGO1	0.253721	0.303261	0.543036	0.558454	0.576534	NA
GNAI3	10.5099	-0.00397772	0.196715	-0.0202207	0.983867	0.992742
AMPD2	2.03431	0.877192	0.407075	2.15487	0.0311723	0.139567
GSTM4	0.804331	0.377407	0.46914	0.804466	0.421128	NA
GSTM2	0.561192	0.429669	0.493037	0.871475	0.383495	NA
GSTM3	1.34718	0.334655	0.51704	0.647252	0.517469	NA
CSF1	0.294146	-0.0591672	0.600883	-0.098467	0.921561	NA
AHCYL1	4.39724	0.086716	0.300186	0.288875	0.772677	0.881848
STRIP1	2.95218	0.309408	0.326014	0.949064	0.342588	0.567388
RP4-773N10.4	0.106935	0.439494	0.783206	0.561147	0.574697	NA
RBM15	3.19563	0.840385	0.324627	2.58877	0.0096318	0.0689154
SLC16A4	0.952105	0.238203	0.479624	0.496646	0.619439	NA
RP5-1074L1.4	0.563395	0.772982	0.669857	1.15395	0.24852	NA
LAMTOR5-AS1	0.359553	0.413317	0.579129	0.713688	0.47542	NA
LAMTOR5	28.4424	-0.0978602	0.114126	-0.857472	0.391184	0.611759
RP11-284N8.3	3.06894	0.0464658	0.369507	0.125751	0.899929	0.951479
KCNA3	5.21996	0.259228	0.360123	0.719833	0.471628	0.677761
CD53	34.6659	0.438346	0.152936	2.86621	0.00415413	0.0406225
RP11-96K19.2	0.373126	0.067577	0.519994	0.129957	0.8966	NA
LRIF1	4.663	-0.169786	0.283545	-0.598799	0.549307	0.736322
DRAM2	15.667	0.248281	0.138807	1.78868	0.0736666	0.232527
CEPT1	4.45202	1.03057	0.310711	3.31682	0.000910484	0.0147739
RP5-1180E21.5	1.14723	0.828927	0.495306	1.67356	0.0942164	NA
DENND2D	4.98664	0.659304	0.367735	1.79288	0.0729927	0.231787
CHI3L2	1.60937	0.554049	0.409556	1.3528	0.176119	NA
PIFO	0.119245	0.68209	0.822847	0.828939	0.407139	NA
OVGP1	0.591943	0.372239	0.620715	0.599693	0.548711	NA
WDR77	2.69431	0.147829	0.384112	0.384859	0.700342	0.838483
ATP5F1	18.7382	-0.0740093	0.143508	-0.515715	0.606053	0.775072
C1orf162	13.0293	0.233486	0.232257	1.00529	0.314757	0.541185
ADORA3	0.0364163	0.819246	3.65066	0.22441	0.822438	NA
RAP1A	21.3386	0.107284	0.152866	0.701818	0.482793	0.687636
FAM212B	0.580309	0.463527	0.483901	0.957896	0.338115	NA
DDX20	3.41109	0.541531	0.325846	1.66192	0.0965284	0.273472
CTTNBP2NL	0.298139	0.330396	0.82478	0.400587	0.688725	NA
WNT2B	0.361805	0.460677	0.542885	0.848573	0.396119	NA
ST7L	1.64029	0.436066	0.396273	1.10042	0.271151	NA
CAPZA1	29.8042	-0.0186385	0.162593	-0.114633	0.908736	0.95668
MOV10	1.11039	0.0629534	0.450331	0.139793	0.888823	NA
RHOC	3.18026	0.224868	0.301737	0.745245	0.456124	0.666052
PPM1J	0.137582	0.872984	1.46649	0.595289	0.55165	NA
SLC16A1	3.8145	0.534844	0.326297	1.63913	0.101186	0.28173
SLC16A1-AS1	1.30192	0.661096	0.426027	1.55177	0.120717	NA
RP11-31F15.2	0.118124	0.3983	0.844458	0.471664	0.637167	NA
LRIG2	2.13707	0.605417	0.408205	1.48312	0.138043	0.337362
MAGI3	0.606137	0.460577	0.489257	0.94138	0.34651	NA
PHTF1	2.72544	0.177182	0.33262	0.532685	0.594251	0.767557
RSBN1	14.4789	0.735948	0.193125	3.81074	0.00013855	0.00439357
PTPN22	9.89896	0.629089	0.222042	2.8332	0.00460847	0.0426905
AP4B1-AS1	0.217614	0.232568	0.558872	0.416139	0.677309	NA
BCL2L15	0.0966861	0.666967	0.677407	0.984589	0.324826	NA
AP4B1	2.00945	0.780071	0.38541	2.02401	0.0429695	0.168803
DCLRE1B	0.358834	0.38974	0.499018	0.781013	0.434795	NA
RP5-1073O3.7	2.2252	1.18743	0.478818	2.47992	0.0131413	0.0816001
HIPK1	10.2057	0.344436	0.293213	1.17469	0.240117	0.467645
TRIM33	10.4062	0.423526	0.245127	1.72778	0.084027	0.252286
BCAS2	25.1579	0.147583	0.206133	0.715958	0.474018	0.679416
DENND2C	0.602099	0.463414	0.491266	0.943306	0.345524	NA
NRAS	5.30252	0.0801533	0.242433	0.33062	0.740932	0.862729
CSDE1	46.1723	0.28955	0.128418	2.25475	0.0241488	0.118623
SIKE1	6.85845	0.527964	0.243556	2.16773	0.0301793	0.136423
TSPAN2	1.35049	0.0905942	0.479355	0.188992	0.850099	NA
RP4-666F24.3	0.105978	0.541458	0.63561	0.851872	0.394285	NA
VANGL1	0.233586	0.480572	0.688175	0.698329	0.484971	NA
SLC22A15	0.152237	0.709453	0.914573	0.77572	0.437914	NA
ATP1A1	23.3761	-0.24703	0.181768	-1.35904	0.174133	0.386834
RP5-1086K13.1	0.0792729	0.550473	2.39135	0.230193	0.817942	NA
CD58	4.1014	-1.59916	0.334666	-4.77838	1.76717e-06	0.000178726
CD2	31.1436	-0.961642	0.311392	-3.08821	0.00201368	0.0256328
CD101	0.133147	0.384851	0.803366	0.479048	0.631904	NA
TTF2	2.48595	0.630616	0.362445	1.73989	0.0818775	0.248269
RP11-188D8.1	0.199978	0.552488	0.662533	0.833903	0.404336	NA
MAN1A2	11.6499	0.472519	0.242439	1.94902	0.0512925	0.189063
FAM46C	24.4194	0.2285	0.198005	1.15401	0.248498	0.475752
GDAP2	2.38802	0.0620536	0.364798	0.170104	0.864928	0.931598
WDR3	1.83876	0.824104	0.401652	2.05179	0.0401905	NA
SPAG17	0.00391008	0	5.84738	0	1	NA
WARS2	1.91732	0.352346	0.35521	0.991937	0.321228	NA
RP11-418J17.1	0.724246	0.938787	0.472798	1.9856	0.047078	NA
ZNF697	0.0891209	0.384802	1.27159	0.302615	0.762183	NA
PHGDH	0.961025	-0.3281	0.478036	-0.68635	0.492493	NA
REG4	0.221159	0.460507	0.601736	0.765297	0.444095	NA
NOTCH2	4.1302	0.318526	0.28758	1.10761	0.26803	0.49633
RP11-439A17.7	1.64865	0.172444	0.425902	0.404891	0.685557	NA
FAM72B	0.0681909	0.404359	1.4449	0.279853	0.77959	NA
FCGR1B	0.0480192	0	1.52473	0	1	NA
RP11-343N15.5	2.92723	-0.18682	0.350306	-0.533306	0.593822	0.767271
RP11-344P13.6	0.441421	0.437034	0.470203	0.929457	0.352652	NA
RP11-417J8.3	0.0328249	0.726881	1.90535	0.381496	0.702836	NA
RP11-423O2.5	0.352408	0.947096	0.623539	1.5189	0.128786	NA
RP11-782C8.1	0.369788	0.895857	0.546311	1.63983	0.101041	NA
RP11-782C8.5	0.149112	0.484179	0.796414	0.607949	0.543221	NA
RP11-435B5.4	0.104474	0.814166	0.911102	0.893606	0.371533	NA
RP6-206I17.1	0.215955	0.449349	0.548859	0.818696	0.41296	NA
RP6-206I17.2	0.258738	0.615507	0.59144	1.04069	0.298018	NA
FAM72D	0.0121647	0	5.84735	0	1	NA
LINC00623	0.450013	0.530137	0.50374	1.0524	0.292615	NA
AL592284.1	9.23583	0.67448	0.215918	3.12378	0.00178546	0.0236815
RP11-640M9.1	19.5395	0.0487991	0.201121	0.242635	0.808288	0.900632
NBPF9	3.66805	0.583126	0.363618	1.60368	0.108785	0.292272
PDE4DIP	4.5545	0.32422	0.352002	0.921075	0.357011	0.582473
AL590452.1	1.57382	-0.134733	0.39459	-0.341452	0.732763	NA
RP11-326G21.1	0.359087	0.767746	0.521189	1.47306	0.140734	NA
NOTCH2NL	13.3627	0.459654	0.211557	2.17273	0.029801	0.135731
NBPF10	14.9262	1.02714	0.251918	4.07729	4.55642e-05	0.00206381
TXNIP	189.395	1.52689	0.25904	5.89442	3.76009e-09	1.12537e-06
POLR3GL	14.1162	0.411809	0.193671	2.12633	0.0334757	0.145297
ANKRD34A	0.15075	0.635864	0.97405	0.652804	0.513883	NA
RP11-315I20.1	0.168338	0.625131	0.692694	0.902463	0.366811	NA
LIX1L	3.62435	-0.282148	0.299681	-0.941492	0.346453	0.571844
RBM8A	40.68	0.125061	0.118715	1.05346	0.292129	0.518459
PEX11B	1.20769	0.464748	0.404764	1.1482	0.250888	NA
ITGA10	0.160691	0.763248	0.606422	1.25861	0.208172	NA
ANKRD35	0.065923	0	0.787643	0	1	NA
PIAS3	0.792761	0.683257	0.45241	1.51026	0.130977	NA
NUDT17	0.441927	0.596793	0.547878	1.08928	0.27603	NA
POLR3C	1.6061	0.374721	0.398075	0.941333	0.346534	NA
RNF115	7.52302	-0.310342	0.222807	-1.39287	0.163658	0.374788
CD160	0.281775	0.361633	0.628667	0.575237	0.565131	NA
GPR89A	2.76587	0.283675	0.361438	0.78485	0.432541	0.647103
GPR89C	0.108175	0.84046	1.10471	0.760799	0.446777	NA
NBPF11	0.312863	0.569426	0.525153	1.08431	0.278229	NA
NBPF12	4.1967	0.552431	0.34407	1.60558	0.108367	0.291821
PRKAB2	2.08074	0.414777	0.416506	0.995849	0.319323	0.54626
RP11-337C18.8	1.14738	0.76943	0.495629	1.55243	0.120559	NA
FMO5	0.563867	0.659478	0.551576	1.19563	0.231843	NA
RP11-337C18.9	0.149947	0.930931	1.12955	0.824164	0.409846	NA
CHD1L	2.35666	0.806132	0.338166	2.38383	0.0171334	0.0956851
BCL9	0.487863	0.73126	0.50758	1.44068	0.149676	NA
ACP6	0.625854	0.56852	0.475351	1.196	0.231696	NA
GPR89B	0.243225	0.486717	0.589037	0.826292	0.408638	NA
LINC01138	0.051827	0.760392	1.20471	0.631181	0.527922	NA
NBPF14	1.84731	0.430092	0.488939	0.879645	0.379052	NA
RP11-89F3.2	0.0739997	0	0.74278	0	1	NA
NBPF20	0.646572	0.584767	0.489696	1.19414	0.232422	NA
NBPF15	18.7279	1.19469	0.243381	4.90871	9.1677e-07	0.000109411
RP11-666A1.5	0.186989	0.55274	0.614933	0.898862	0.368726	NA
NBPF16	0.942032	0.885102	0.489899	1.8067	0.0708087	NA
RP11-763B22.4	0.435915	0.648611	0.525727	1.23374	0.2173	NA
RP11-14N7.2	0.614916	0.735608	0.490838	1.49868	0.133957	NA
RP11-403I13.4	0.275694	0.17925	0.550411	0.325665	0.744678	NA
RP11-403I13.8	1.58054	0.626606	0.437908	1.43091	0.152456	NA
FAM72C	0.0147116	0.784258	5.84735	0.134122	0.893306	NA
RP11-277L2.4	2.81336	0.714032	0.42962	1.66201	0.0965114	0.273472
RP11-277L2.3	1.66473	0.665679	0.404777	1.64456	0.100061	NA
RP11-277L2.5	0.0733448	0.43662	1.34216	0.325311	0.744946	NA
RP11-353N4.1	0.0309793	0	1.33197	0	1	NA
FCGR1A	0.184824	0.828207	0.774796	1.06894	0.285098	NA
HIST2H2AA3	4.05188	0.293985	0.33536	0.876626	0.38069	0.603658
RP11-196G18.24	0.174287	0.855237	0.673642	1.26957	0.204237	NA
HIST2H2BE	1.42721	0.968188	0.409798	2.3626	0.0181472	NA
HIST2H2AC	14.3417	0.903239	0.311511	2.89954	0.00373715	0.0383926
BOLA1	1.27339	0.648879	0.428469	1.51441	0.129921	NA
SV2A	0.210541	0.416798	0.522105	0.798303	0.424695	NA
SF3B4	4.34278	-0.774209	0.24066	-3.21702	0.00129527	0.0190498
MTMR11	0.257864	0.755882	0.645152	1.17163	0.241344	NA
OTUD7B	0.770557	0.216789	0.496053	0.437028	0.662091	NA
VPS45	1.59995	0.9088	0.444151	2.04615	0.0407413	NA
PLEKHO1	11.3285	0.0378748	0.193619	0.195615	0.844911	0.922326
ANP32E	15.4904	0.075229	0.180452	0.416892	0.676757	0.824215
APH1A	14.3576	0.0105593	0.141906	0.0744105	0.940684	0.971066
C1orf54	0.530117	0.593612	0.462831	1.28257	0.199644	NA
C1orf51	0.0538927	0	0.951272	0	1	NA
MRPS21	27.5341	0.115697	0.126642	0.913577	0.360939	0.585802
PRPF3	4.22251	-0.216569	0.312219	-0.693644	0.487905	0.691137
RPRD2	5.81071	0.79903	0.290562	2.74994	0.00596055	0.0508161
TARS2	1.88446	0.531132	0.414597	1.28108	0.200166	NA
LINC00568	0.317446	0.561884	0.556632	1.00944	0.312765	NA
RP11-54A4.2	0.00862518	0.71519	5.52245	0.129506	0.896957	NA
ADAMTSL4	0.065138	0.756515	0.944369	0.80108	0.423085	NA
ADAMTSL4-AS1	0.123208	0.60406	0.718099	0.841193	0.40024	NA
MCL1	88.0327	-0.0980211	0.148366	-0.66067	0.508824	0.707447
ENSA	26.2272	-0.135457	0.127139	-1.06543	0.286683	0.515293
GOLPH3L	1.35305	-0.132372	0.417588	-0.316991	0.75125	NA
CTSS	36.2417	0.540439	0.133257	4.05562	5.00014e-05	0.00218438
CTSK	0.226935	0.843824	0.606057	1.39232	0.163826	NA
ARNT	1.94776	0.56825	0.385762	1.47306	0.140735	0.34056
SETDB1	2.48032	0.6003	0.35822	1.67578	0.0937808	0.269138
CERS2	4.82046	0.365949	0.257509	1.42111	0.155285	0.361662
FAM63A	0.563785	0.35471	0.501789	0.706891	0.479635	NA
PRUNE	0.987743	0.159697	0.436071	0.366217	0.714203	NA
BNIPL	0.0882881	0.561951	0.762074	0.737396	0.460882	NA
C1orf56	30.2865	0.677819	0.220256	3.07741	0.00208805	0.0261047
CDC42SE1	34.6635	0.535675	0.173602	3.08565	0.00203106	0.0257484
MLLT11	1.26144	0.498793	0.433759	1.14993	0.250172	NA
GABPB2	3.93235	0.556427	0.365323	1.52311	0.127732	0.321638
TNFAIP8L2	0.450376	0.139924	0.536195	0.260956	0.794126	NA
SCNM1	7.36098	0.348034	0.240775	1.44547	0.148325	0.35189
LYSMD1	0.0939312	0.689201	1.10749	0.622311	0.533737	NA
TMOD4	0.0209817	0.615638	3.36325	0.183049	0.85476	NA
VPS72	2.56263	0.231136	0.364417	0.634263	0.525909	0.71951
PIP5K1A	2.96363	0.382855	0.34622	1.10581	0.268807	0.496895
PSMD4	14.488	-0.197338	0.172323	-1.14516	0.252142	0.479676
RP11-126K1.2	0.36862	0.289946	0.575487	0.503826	0.614383	NA
ZNF687	0.841485	0.277225	0.412416	0.672199	0.501457	NA
PI4KB	4.8665	0.348981	0.288677	1.2089	0.226703	0.452731
RFX5	4.06641	-0.0166103	0.243458	-0.0682268	0.945605	0.973153
RP11-126K1.6	0.721416	-0.108308	0.418059	-0.259074	0.795578	NA
SELENBP1	0.00572957	0.636259	5.84737	0.108811	0.913352	NA
PSMB4	14.146	-0.250375	0.153555	-1.63052	0.102992	0.283726
POGZ	8.69109	0.0202325	0.22766	0.0888713	0.929184	0.965315
TUFT1	0.487851	0.638433	0.493479	1.29374	0.195756	NA
SNX27	3.25838	0.352704	0.370637	0.951618	0.341291	0.56609
MRPL9	9.47219	-0.132203	0.172521	-0.766302	0.443496	0.656179
OAZ3	0.124637	0.773324	1.37149	0.563856	0.572852	NA
TDRKH	0.295881	0.45144	0.586648	0.769525	0.441582	NA
RP11-98D18.9	0.355438	0.231648	0.517143	0.447938	0.654198	NA
RORC	0.108414	0	0.806712	0	1	NA
C2CD4D	0.111448	0	0.649213	0	1	NA
THEM4	7.84938	0.0556796	0.30639	0.181728	0.855796	0.927028
S100A10	82.9175	-0.566876	0.147964	-3.83118	0.000127531	0.00411163
S100A11	41.8975	-0.800906	0.201362	-3.97744	6.96612e-05	0.00272121
TCHH	0.0298452	0.549205	2.00877	0.273403	0.784543	NA
S100A9	39.9727	0.682818	0.263764	2.58874	0.00963272	0.0689154
S100A12	4.8868	1.03798	0.406518	2.55334	0.0106694	0.0724677
S100A8	30.5898	1.63441	0.280552	5.82572	5.68679e-09	1.49948e-06
S100A6	135.038	-0.0281456	0.130486	-0.215698	0.829223	0.913101
S100A5	0.131166	0.545853	0.610756	0.893733	0.371465	NA
S100A4	155.316	0.128354	0.14813	0.866493	0.38622	0.607728
S100A3	0.00115026	0	5.84738	0	1	NA
S100A2	0.131299	0	1.1575	0	1	NA
S100A16	0.00152403	0	5.84739	0	1	NA
S100A14	0.00570284	0	5.84739	0	1	NA
S100A13	0.893805	0.778059	0.425147	1.83009	0.0672359	NA
RP1-178F15.4	0.139676	0.856029	0.912999	0.937601	0.348449	NA
CHTOP	9.06269	0.609324	0.233567	2.60877	0.00908679	0.0662923
SNAPIN	4.03815	-0.225979	0.292821	-0.771732	0.440273	0.65329
ILF2	14.1283	-0.216424	0.153706	-1.40804	0.159118	0.36723
INTS3	2.21999	0.486053	0.418552	1.16127	0.245531	0.472725
SLC27A3	0.708645	0.115875	0.464886	0.249254	0.803165	NA
GATAD2B	6.17487	0.67607	0.287822	2.34892	0.018828	0.101448
DENND4B	4.16479	0.971977	0.313787	3.09756	0.00195118	0.025136
CRTC2	3.21462	0.685876	0.331757	2.0674	0.0386961	0.158542
SLC39A1	2.896	0.26486	0.278798	0.950008	0.342108	0.567082
CREB3L4	0.369254	0.599508	0.493333	1.21522	0.224282	NA
JTB	38.7774	0.0227993	0.112033	0.203505	0.83874	0.918931
RP11-422P24.11	0.0771407	0.653858	0.962668	0.679215	0.497002	NA
RAB13	0.669196	0.651798	0.550959	1.18302	0.236799	NA
RPS27	3574.15	0.284836	0.0705909	4.03503	5.45953e-05	0.00237104
TPM3	59.5075	0.191614	0.130451	1.46886	0.141871	0.342186
C1orf43	15.0363	-0.225257	0.151695	-1.48493	0.137562	0.336968
UBAP2L	5.00296	-0.115204	0.282918	-0.407198	0.683863	0.828987
HAX1	19.0569	-0.302837	0.135849	-2.22922	0.0257995	0.123207
ATP8B2	4.35248	-0.0593922	0.430053	-0.138104	0.890158	0.946026
IL6R	5.88444	0.0729977	0.358488	0.203627	0.838645	0.918931
UBE2Q1	5.14814	-0.188454	0.276793	-0.68085	0.495966	0.696674
ADAR	25.9319	-0.127677	0.178051	-0.717079	0.473325	0.678974
PMVK	8.49256	-0.152076	0.20449	-0.743686	0.457066	0.666642
RP11-307C12.13	0.428745	0.344791	0.541165	0.637128	0.524042	NA
PBXIP1	19.3085	-0.270413	0.21078	-1.28292	0.199521	0.41908
PYGO2	2.20387	-0.0214926	0.374464	-0.0573956	0.95423	0.977397
RP11-307C12.12	0.739271	0.783521	0.434554	1.80305	0.0713806	NA
SHC1	2.41543	0.307372	0.340532	0.902623	0.366726	0.591295
CKS1B	3.88937	-0.0921279	0.23257	-0.396129	0.69201	0.834173
FLAD1	3.10855	0.950241	0.343624	2.76535	0.00568622	0.049448
ZBTB7B	1.95593	0.818753	0.416723	1.96474	0.0494441	0.185115
ADAM15	0.841209	0.240427	0.439337	0.547249	0.584208	NA
EFNA4	1.4901	0.292589	0.392102	0.746207	0.455542	NA
EFNA3	0.261299	0.632254	0.615028	1.02801	0.303946	NA
EFNA1	0.101461	0.459585	0.754683	0.608978	0.542539	NA
SLC50A1	5.70812	0.0863606	0.230983	0.373884	0.708491	0.84286
DPM3	7.56278	0.223219	0.220607	1.01184	0.311615	0.537497
KRTCAP2	24.7658	0.192741	0.151103	1.27556	0.202112	0.422499
TRIM46	0.27053	0.312739	0.581112	0.538174	0.590457	NA
MUC1	0.168831	0	0.565639	0	1	NA
THBS3	0.649971	0.386876	0.520605	0.743127	0.457405	NA
RP11-263K19.4	0.106621	0	0.616467	0	1	NA
MTX1	3.74745	-0.287473	0.24424	-1.17701	0.239193	0.467061
GBA	0.972523	-0.126922	0.447185	-0.283825	0.776545	NA
FAM189B	0.830519	-0.485454	0.431786	-1.12429	0.260889	NA
SCAMP3	3.4974	-0.186656	0.299256	-0.623734	0.532802	0.724773
CLK2	1.54048	0.68931	0.446202	1.54484	0.122386	NA
HCN3	0.050674	0.630548	1.49615	0.421447	0.673429	NA
FDPS	9.74314	0.00115743	0.195536	0.00591927	0.995277	0.996251
RUSC1-AS1	0.0280929	0.692505	1.85516	0.373286	0.708936	NA
RUSC1	1.01345	0.601623	0.443947	1.35517	0.175364	NA
ASH1L	30.2435	0.780502	0.208311	3.74682	0.000179092	0.00521525
MSTO1	1.698	0.325173	0.414901	0.783735	0.433195	NA
YY1AP1	3.89883	-0.263561	0.299645	-0.879576	0.379089	0.601766
DAP3	12.3457	-0.228824	0.160597	-1.42484	0.154205	0.360055
GON4L	11.0964	0.307353	0.225666	1.36198	0.173204	0.385983
SYT11	1.70195	0.602326	0.434702	1.38561	0.165867	NA
RIT1	4.87692	0.474026	0.252691	1.87591	0.0606674	0.207749
KIAA0907	8.976	0.460308	0.243322	1.89177	0.058522	0.203135
ARHGEF2	5.99402	0.0418201	0.263902	0.158468	0.874088	0.937993
RP11-336K24.12	0.183611	0.700603	0.771983	0.907537	0.364123	NA
SSR2	69.7359	-0.244725	0.0957699	-2.55534	0.0106083	0.0721188
UBQLN4	0.977644	0.676341	0.436244	1.55037	0.121052	NA
LAMTOR2	11.2463	0.0237638	0.199523	0.119103	0.905194	0.954448
RAB25	0.11891	0	0.657583	0	1	NA
MEX3A	0.106445	0.758718	1.17119	0.647816	0.517104	NA
LMNA	71.0852	-0.671401	0.245849	-2.73094	0.00631533	0.0525661
SEMA4A	3.62085	0.00317832	0.378414	0.00839906	0.993299	0.995997
SLC25A44	1.68515	-0.186427	0.361691	-0.515431	0.606252	NA
PMF1	9.45537	-0.135146	0.178356	-0.757734	0.44861	0.659516
BGLAP	0.0968481	0.548315	0.778831	0.704023	0.481418	NA
PAQR6	0.548364	0.26562	0.56513	0.470016	0.638344	NA
SMG5	2.34169	0.350274	0.351434	0.996698	0.318911	0.546158
TMEM79	0.575037	1.01485	0.49382	2.05509	0.0398699	NA
C1orf85	1.15892	-0.0879347	0.422717	-0.208023	0.835211	NA
CCT3	19.1999	-0.409751	0.1503	-2.72623	0.00640629	0.0530963
C1orf61	0.211248	0.370399	0.595332	0.622173	0.533828	NA
RP11-98G7.1	0.191949	0.768391	0.626704	1.22608	0.220167	NA
MEF2D	5.05711	0.347736	0.258844	1.34342	0.179136	0.394089
TTC24	0.149497	0.874654	0.916254	0.954598	0.339781	NA
APOA1BP	6.0039	0.136623	0.218286	0.62589	0.531387	0.723902
GPATCH4	7.38629	0.257337	0.224137	1.14812	0.250918	0.478122
ISG20L2	10.4465	0.357129	0.206859	1.72643	0.0842692	0.2525
RRNAD1	1.6076	0.633419	0.381029	1.66239	0.096435	NA
MRPL24	3.22217	0.0815622	0.288164	0.283041	0.777146	0.883806
HDGF	5.67027	-0.17492	0.240827	-0.726333	0.467635	0.674754
PRCC	4.23536	0.231615	0.261701	0.885037	0.376137	0.599214
SH2D2A	3.09516	-1.29099	0.423865	-3.04576	0.0023209	0.027593
PEAR1	0.0108371	0.708357	3.81143	0.18585	0.852562	NA
ARHGEF11	0.179622	0.384662	0.621093	0.619331	0.535699	NA
ETV3	8.11122	0.437864	0.300837	1.45549	0.145534	0.347616
FCRL5	11.9436	1.33183	0.343305	3.87945	0.000104694	0.00359515
FCRL3	4.31407	0.957029	0.404039	2.36866	0.0178529	0.0982907
FCRL2	8.60805	0.728435	0.360718	2.0194	0.0434455	0.169624
FCRL1	8.93267	0.802002	0.276875	2.89662	0.00377208	0.038519
CD1D	0.766611	0.946586	0.526234	1.79879	0.0720512	NA
CD1A	0.0772016	1.15437	3.92114	0.294395	0.768456	NA
CD1C	2.62223	-0.122678	0.408381	-0.300401	0.763872	0.877774
CD1E	0.00269983	0	5.84739	0	1	NA
MNDA	3.36556	0.434567	0.346917	1.25265	0.210331	0.432918
PYHIN1	7.73321	0.959254	0.381904	2.51177	0.0120129	0.0770065
IFI16	31.1788	-0.0040425	0.21116	-0.0191442	0.984726	0.993219
AIM2	6.93449	0.448814	0.346988	1.29346	0.195854	0.414471
FCER1A	0.150427	0.792499	0.708435	1.11866	0.263285	NA
DUSP23	3.63146	-0.346413	0.311965	-1.11042	0.266817	0.495273
FCRL6	0.21962	0.508701	0.728521	0.698266	0.485011	NA
SLAMF8	0.0412471	0.589383	2.02947	0.290412	0.771501	NA
VSIG8	0.109636	0.666152	0.782324	0.851504	0.394489	NA
CCDC19	0.284279	0.261172	0.559926	0.46644	0.6409	NA
TAGLN2	72.7028	-0.680223	0.106575	-6.38255	1.74164e-10	9.18466e-08
SLAMF9	0.00934768	0.63394	4.94313	0.128247	0.897954	NA
PIGM	1.03701	-0.107838	0.460111	-0.234373	0.814695	NA
IGSF8	2.33593	-0.162234	0.328645	-0.493645	0.621557	0.786599
PEA15	4.55481	-0.674246	0.26238	-2.56973	0.0101777	0.0710223
DCAF8	4.70576	0.247792	0.285946	0.866569	0.386178	0.607728
RP11-574F21.2	0.18497	0.472298	0.545946	0.8651	0.386984	NA
PEX19	1.75311	0.488145	0.388095	1.2578	0.208465	NA
COPA	11.7266	0.305549	0.204747	1.49233	0.135613	0.333634
NCSTN	2.82202	0.611382	0.295486	2.06907	0.0385393	0.158339
SLAMF6	3.32454	1.00753	0.391246	2.57517	0.0100191	0.070248
CD84	8.33616	-0.166251	0.351302	-0.473242	0.63604	0.794861
SLAMF1	3.43788	-0.663522	0.354722	-1.87054	0.0614087	0.209124
CD48	83.2125	-0.191852	0.0944214	-2.03187	0.0421673	0.167076
SLAMF7	4.79717	-0.288279	0.407645	-0.707182	0.479453	0.6842
LY9	15.4643	0.0627061	0.211696	0.296208	0.767071	0.878029
CD244	0.144968	0.358167	0.613018	0.584268	0.55904	NA
F11R	1.00645	1.09013	0.433585	2.51423	0.0119292	NA
TSTD1	36.7072	0.489438	0.135096	3.62288	0.000291341	0.00731624
USF1	1.84276	0.167814	0.395417	0.424397	0.671276	NA
ARHGAP30	19.7172	0.536459	0.218444	2.45582	0.0140562	0.0852029
PVRL4	0.000849032	0	5.84739	0	1	NA
PFDN2	18.8717	-0.0808616	0.145837	-0.554467	0.579259	0.756799
NIT1	1.7979	0.300858	0.378998	0.793825	0.427297	NA
DEDD	1.72695	0.392113	0.360627	1.08731	0.2769	NA
UFC1	34.2278	0.140599	0.0965597	1.45608	0.145371	0.34745
USP21	0.952272	0.369674	0.451794	0.818235	0.413223	NA
PPOX	2.19748	0.724875	0.368494	1.96713	0.0491682	0.184268
B4GALT3	6.82414	-0.289562	0.224935	-1.28732	0.197983	0.416871
NDUFS2	8.47568	0.12936	0.209769	0.616677	0.537448	0.729006
FCER1G	5.93337	-0.275213	0.296343	-0.928698	0.353046	0.578716
TOMM40L	0.479694	0.607389	0.493612	1.2305	0.218511	NA
MPZ	0.237245	0.667439	0.618892	1.07844	0.280836	NA
SDHC	8.58769	-0.195639	0.191351	-1.02241	0.306587	0.532972
RP11-122G18.5	0.165982	0.688033	0.766985	0.897062	0.369686	NA
FCGR2A	1.02378	0.379836	0.446311	0.851057	0.394738	NA
HSPA6	0.74385	0.263341	0.761793	0.345686	0.729578	NA
FCGR3A	1.34497	-0.226069	0.45234	-0.499776	0.617233	NA
FCGR2B	5.02203	0.570751	0.254115	2.24604	0.0247015	0.119944
FCRLA	5.9272	0.458486	0.268186	1.70958	0.0873431	0.25753
FCRLB	0.206238	0.575435	0.818388	0.703132	0.481973	NA
DUSP12	3.96682	-0.0199627	0.260995	-0.0764871	0.939032	0.970437
RP11-474I16.8	0.0962984	0.651331	1.10121	0.591467	0.554208	NA
ATF6	6.01976	0.459065	0.266739	1.72102	0.0852464	0.254293
SH2D1B	0.164962	0.27596	0.698952	0.394819	0.692976	NA
UHMK1	13.1424	0.441754	0.213651	2.06764	0.0386736	0.158542
UAP1	7.55576	-0.123878	0.253538	-0.488597	0.625127	0.787988
DDR2	0.141967	0.844591	0.771347	1.09496	0.273536	NA
HSD17B7	3.16927	0.777192	0.334288	2.32492	0.0200763	0.105894
RGS5	0.0574943	0.544864	1.12974	0.482292	0.629598	NA
NUF2	0.295228	0.202086	0.558187	0.362039	0.717323	NA
MGST3	12.1522	-0.0263956	0.197833	-0.133424	0.893858	0.947543
ALDH9A1	5.31799	0.190397	0.245841	0.77447	0.438653	0.652281
TMCO1	15.5069	0.544602	0.177523	3.06778	0.00215653	0.0266087
UCK2	0.57622	0.529571	0.513342	1.03161	0.302253	NA
POGK	4.51823	0.0234964	0.303375	0.0774501	0.938266	0.970437
TADA1	1.05821	0.126372	0.415913	0.303844	0.761247	NA
ILDR2	0.0198066	0.646866	4.16274	0.155394	0.876511	NA
GPA33	0.354067	0.334686	0.501279	0.667663	0.504348	NA
RP11-277B15.3	0.0585743	0	1.15357	0	1	NA
POU2F1	3.93997	0.362914	0.303954	1.19397	0.232488	0.459892
CD247	12.3717	-0.217537	0.303631	-0.716452	0.473712	0.67911
RP11-104L21.3	0.277786	0	0.506394	0	1	NA
CREG1	1.75688	0.139635	0.366569	0.380926	0.703258	NA
RP3-455J7.4	0.324304	0.876983	1.14952	0.762914	0.445514	NA
RCSD1	23.6348	0.297752	0.189752	1.56917	0.116609	0.305079
MPZL1	1.42145	-0.0449543	0.401295	-0.112023	0.910805	NA
MPC2	15.9385	-0.0544306	0.148564	-0.366378	0.714083	0.846182
DCAF6	3.5555	0.532129	0.317555	1.67571	0.0937955	0.269138
TIPRL	6.78073	-0.309094	0.22486	-1.37461	0.169253	0.38201
SFT2D2	6.44641	0.556999	0.267384	2.08314	0.0372387	0.154674
TBX19	0.43256	0.945774	0.576252	1.64125	0.100745	NA
XCL2	0.311989	0.0811778	0.580746	0.139782	0.888832	NA
XCL1	0.248981	0.732191	0.75586	0.968686	0.332702	NA
ATP1B1	1.71013	0.643976	0.426375	1.51035	0.130954	NA
NME7	1.83637	0.220627	0.374821	0.58862	0.556116	NA
BLZF1	2.64405	0.0136154	0.359798	0.0378418	0.969814	0.985295
SLC19A2	0.545177	0.542564	0.461204	1.17641	0.239433	NA
F5	0.946967	0.313034	0.520688	0.601193	0.547712	NA
SELP	0.11544	0.635506	0.802363	0.792042	0.428336	NA
C1orf112	0.456657	0.602449	0.487824	1.23497	0.216841	NA
SELL	34.8944	0.562556	0.176721	3.18329	0.0014561	0.0207938
METTL18	1.38342	0.315101	0.405771	0.77655	0.437424	NA
SCYL3	1.80444	0.950626	0.428232	2.21989	0.0264265	NA
KIFAP3	3.07426	-0.0813273	0.323322	-0.251536	0.8014	0.89678
GORAB	1.67848	0.838818	0.394816	2.12458	0.0336219	NA
FMO2	0.00570284	0	5.84739	0	1	NA
FMO1	0.0203622	0	5.84738	0	1	NA
FMO4	0.456559	0.808748	0.606137	1.33427	0.182117	NA
PRRC2C	81.4154	0.316189	0.144219	2.19243	0.0283488	0.131884
VAMP4	3.29772	0.7013	0.367579	1.90789	0.0564055	0.199452
METTL13	1.15445	0.481543	0.443101	1.08676	0.277144	NA
DNM3	0.22534	0.121581	0.621016	0.195778	0.844784	NA
PIGC	3.76847	0.454085	0.302695	1.50014	0.133578	0.329999
SUCO	6.32531	0.590911	0.26793	2.20547	0.0274212	0.12854
FASLG	0.201793	0.19175	0.733435	0.261441	0.793752	NA
TNFSF4	0.180889	0.298545	0.630664	0.473382	0.635941	NA
RP11-296O14.3	0.855448	-0.398014	0.464312	-0.857211	0.391328	NA
PRDX6	18.9996	-0.0991802	0.13637	-0.72729	0.467048	0.674686
ANKRD45	0.0155624	0	5.8474	0	1	NA
KLHL20	3.23369	0.526731	0.322546	1.63304	0.10246	0.283055
CENPL	1.39445	0.914581	0.410347	2.2288	0.0258272	NA
DARS2	0.284921	0.226213	0.54874	0.412241	0.680163	NA
ZBTB37	2.79117	0.438217	0.444374	0.986145	0.324062	0.551391
RC3H1	6.19122	0.680073	0.280733	2.42249	0.0154144	0.0899643
RP11-160H22.3	0.0199229	0	1.69461	0	1	NA
RP11-160H22.5	0.16468	0.864972	0.721399	1.19902	0.23052	NA
RABGAP1L	10.162	0.491727	0.241953	2.03232	0.0421208	0.167076
CACYBP	11.6019	0.139715	0.200263	0.697657	0.485392	0.689312
MRPS14	5.63667	0.116705	0.24089	0.484473	0.62805	0.789527
KIAA0040	7.81024	0.72951	0.276559	2.63781	0.00834433	0.0630565
RFWD2	4.44353	0.618635	0.290657	2.1284	0.033304	0.144808
RASAL2	0.00450496	0	5.84738	0	1	NA
RALGPS2	35.6335	0.930275	0.210459	4.42022	9.85994e-06	0.000679362
FAM20B	1.63544	-0.482811	0.421308	-1.14598	0.251803	NA
TOR3A	7.55264	-0.0291826	0.199855	-0.146019	0.883907	0.942269
ABL2	5.15527	0.148092	0.354915	0.417259	0.676489	0.824157
SOAT1	2.43521	0.457266	0.371275	1.23161	0.218095	0.441755
TOR1AIP2	7.01976	0.483617	0.24808	1.94944	0.0512426	0.188973
RP11-533E19.7	0.360635	0.132667	0.463766	0.286064	0.774829	NA
TOR1AIP1	6.7151	-0.15729	0.281898	-0.557969	0.576866	0.755282
CEP350	16.3739	0.852187	0.248374	3.43106	0.000601232	0.0116201
QSOX1	1.43975	0.161827	0.413233	0.391611	0.695345	NA
LHX4	0.240963	0.51146	0.673184	0.759762	0.447397	NA
RP5-1180C10.2	0.373696	0.506915	0.539108	0.940284	0.347072	NA
ACBD6	7.23526	0.304226	0.246168	1.23584	0.216516	0.439348
XPR1	2.00892	0.930736	0.393474	2.36543	0.018009	0.0988555
KIAA1614	0.0395613	0.786113	2.36119	0.332931	0.739187	NA
RP11-46A10.5	0.0217792	0.718787	2.23928	0.32099	0.748218	NA
RP11-46A10.4	0.0276068	0.786919	1.7247	0.456264	0.6482	NA
STX6	2.17999	0.697397	0.394487	1.76786	0.0770845	0.23869
MR1	2.69625	-0.183758	0.335339	-0.547977	0.583708	0.760099
IER5	23.6414	0.175642	0.210246	0.835413	0.403485	0.622628
RP11-309G3.3	0.302189	0.525501	0.515972	1.01847	0.308455	NA
GLUL	6.30328	0.50979	0.310047	1.64423	0.100128	0.280335
RNASEL	1.35675	0.54119	0.469327	1.15312	0.248861	NA
RGS16	6.53497	-0.620112	0.300139	-2.06608	0.0388208	0.158877
NPL	0.44706	0.453853	0.494614	0.91759	0.358833	NA
DHX9	10.5413	0.521429	0.208689	2.4986	0.0124685	0.0786122
SMG7	3.84733	1.17213	0.349828	3.3506	0.000806374	0.0137812
NCF2	1.9163	0.755782	0.374628	2.01742	0.0436517	NA
ARPC5	32.1649	-0.145699	0.1748	-0.833518	0.404553	0.623317
RGL1	0.229568	0.47094	0.60171	0.78267	0.433821	NA
COLGALT2	0.0328728	0	1.60255	0	1	NA
TSEN15	3.57551	0.49529	0.303034	1.63444	0.102166	0.282719
C1orf21	0.773632	-0.554923	0.526147	-1.05469	0.291567	NA
EDEM3	7.18909	0.804871	0.325422	2.47331	0.0133868	0.0824996
FAM129A	6.89866	0.423381	0.36878	1.14806	0.250944	0.478122
RNF2	2.92269	0.156467	0.307205	0.509324	0.610525	0.778496
TRMT1L	1.71012	0.278378	0.41546	0.670048	0.502827	NA
SWT1	1.16934	0.403827	0.452241	0.892947	0.371885	NA
IVNS1ABP	15.3178	-0.104815	0.212814	-0.492521	0.622351	0.78698
TPR	33.2302	0.229012	0.189733	1.20702	0.227423	0.453593
C1orf27	3.82383	0.267433	0.306648	0.872115	0.383146	0.6053
PTGS2	0.888179	-1.02163	0.497529	-2.05341	0.040033	NA
RP5-973M2.2	0.0125121	0	5.25696	0	1	NA
PLA2G4A	0.0329446	0	3.44494	0	1	NA
RGS18	1.70357	0.610337	0.458291	1.33177	0.182937	NA
RGS1	50.5578	0.40359	0.252611	1.59767	0.110116	0.294537
RGS13	0.808314	-0.225881	0.622179	-0.363048	0.716569	NA
RGS2	45.2656	0.493428	0.184305	2.67724	0.00742316	0.0587408
UCHL5	4.4037	0.00274572	0.28732	0.00955632	0.992375	0.995767
TROVE2	12.8883	0.230147	0.187804	1.22547	0.220399	0.444471
RP11-101E13.5	0.119262	0.61423	0.72721	0.844639	0.398312	NA
GLRX2	2.27379	0.268844	0.347917	0.772723	0.439686	0.652957
CDC73	8.25416	0.10726	0.234993	0.456442	0.648072	0.802536
B3GALT2	0.168537	0.63719	0.764454	0.833524	0.404549	NA
RP11-476B1.1	0	NA	NA	NA	NA	NA
CFH	0.594877	0.586514	0.573839	1.02209	0.306739	NA
ASPM	0.372784	0.381641	0.648591	0.588415	0.556254	NA
ZBTB41	2.12635	0.866965	0.408842	2.12054	0.0339606	0.146659
DENND1B	6.55098	0.56559	0.268974	2.10277	0.0354856	0.149932
C1orf53	0.220181	0.52336	1.02409	0.51105	0.609316	NA
NEK7	4.95735	0.00241918	0.322427	0.00750302	0.994014	0.996251
PTPRC	106.752	0.704271	0.181281	3.88497	0.000102345	0.00354746
MIR181A1HG	1.1901	0.761603	0.467678	1.62848	0.103423	NA
ZNF281	7.51865	0.0324819	0.242402	0.134	0.893403	0.947464
KIF14	0.0679303	0.780253	2.38995	0.326472	0.744067	NA
DDX59	2.98161	0.367092	0.333915	1.09936	0.271611	0.499634
CAMSAP2	0.427117	0.197574	0.532161	0.371268	0.710438	NA
KIF21B	2.37391	-0.0168209	0.365984	-0.0459607	0.963342	0.981489
TMEM9	1.63335	0.520113	0.364356	1.42749	0.15344	NA
PHLDA3	0.0708268	0.55071	0.964279	0.57111	0.567925	NA
CSRP1	2.43375	-0.721129	0.322753	-2.2343	0.025463	0.122046
RP11-134G8.7	0.110345	0.823024	1.48521	0.554148	0.579477	NA
RPS10P7	0.626319	0.528726	0.48959	1.07994	0.28017	NA
NAV1	0.280192	0.513368	0.541484	0.948076	0.343091	NA
IPO9-AS1	0.187118	0.826184	0.707557	1.16766	0.242945	NA
IPO9	4.46016	0.683878	0.319302	2.14179	0.0322106	0.142231
SHISA4	0.035138	0.716467	2.72832	0.262604	0.792856	NA
TIMM17A	9.74513	-0.0124656	0.182684	-0.068236	0.945598	0.973153
RNPEP	2.42663	0.581574	0.342539	1.69783	0.0895396	0.262046
ELF3	0.0643018	0.236056	1.44726	0.163106	0.870435	NA
ARL8A	3.54691	-0.511678	0.289147	-1.76961	0.0767913	0.238315
PTPN7	13.3987	-0.180976	0.205996	-0.87854	0.379651	0.602528
LGR6	0.0404403	0.620022	1.34485	0.461034	0.644775	NA
UBE2T	0.595063	0.648961	0.474949	1.36638	0.171819	NA
PPP1R12B	1.85139	1.23818	0.443471	2.79203	0.00523786	NA
KDM5B	2.63217	0.629863	0.351679	1.79102	0.0732904	0.232133
RABIF	5.50113	0.0672748	0.24479	0.274826	0.78345	0.887285
KLHL12	1.40144	-0.115153	0.375343	-0.306795	0.758999	NA
ADIPOR1	7.17274	-0.221059	0.206687	-1.06954	0.284828	0.513976
CYB5R1	2.31003	0.391635	0.347415	1.12728	0.259623	0.487363
TMEM183A	9.20319	0.178124	0.197428	0.902224	0.366938	0.591378
RP11-134P9.3	0.472859	1.04344	0.487655	2.13971	0.032378	NA
LINC01136	0.208488	0.507418	0.673446	0.753465	0.451171	NA
BTG2	110.168	0.0712763	0.145163	0.491009	0.62342	0.787095
ATP2B4	3.6919	-0.217249	0.397062	-0.54714	0.584283	0.760268
LAX1	5.24348	0.142726	0.282951	0.504421	0.613966	0.780728
ZC3H11A	12.1012	0.85637	0.239102	3.58161	0.000341484	0.0080807
ZBED6	5.81203	0.460853	0.272583	1.69069	0.0908957	0.264206
SNRPE	26.4848	-0.256361	0.110223	-2.32585	0.0200267	0.105881
SOX13	0.193586	0.485967	0.818958	0.593396	0.552916	NA
ETNK2	0.163371	0.326854	0.512915	0.637248	0.523963	NA
PPP1R15B	14.8045	0.596649	0.217022	2.74925	0.0059732	0.0508422
PIK3C2B	1.86679	0.707032	0.375262	1.8841	0.0595513	NA
MDM4	35.5906	0.783513	0.186596	4.19899	2.68108e-05	0.00142406
RP11-430C7.4	0.514174	1.01145	0.543586	1.8607	0.0627865	NA
TMEM81	0.0886907	0.424613	0.726697	0.584305	0.559015	NA
RBBP5	5.9853	0.760231	0.264027	2.87937	0.00398465	0.0395945
DSTYK	3.95043	0.657803	0.36833	1.78591	0.0741142	0.233253
NUAK2	3.08855	0.202364	0.272794	0.741817	0.458198	0.667497
MFSD4	0.178374	0.562013	0.587477	0.956655	0.338742	NA
ELK4	10.0419	-0.0381348	0.224577	-0.169807	0.865162	0.931598
SLC45A3	0.0854026	1.13436	3.1854	0.356111	0.721757	NA
NUCKS1	27.3736	0.572881	0.15735	3.64081	0.00027178	0.00691913
RAB7L1	12.811	0.0727214	0.187485	0.387878	0.698106	0.83714
SLC41A1	2.06681	0.729604	0.405265	1.80031	0.0718111	0.230113
RP11-312O7.2	0.774762	0.209926	0.475149	0.441812	0.658625	NA
FAM72A	0.240934	0.320022	0.75294	0.42503	0.670815	NA
C1orf186	1.8319	1.06138	0.488486	2.1728	0.0297955	NA
SRGAP2	2.35286	0.746805	0.38356	1.94704	0.0515305	0.18975
IKBKE	3.10107	0.70131	0.401893	1.74502	0.080982	0.246549
RASSF5	13.9929	-0.160702	0.199462	-0.805678	0.420429	0.637246
EIF2D	4.33251	-0.12569	0.250675	-0.501408	0.616084	0.782748
DYRK3	0.271599	0.346445	0.532346	0.65079	0.515182	NA
MAPKAPK2	5.46208	-0.495684	0.252638	-1.96203	0.049759	0.185916
IL10	0.262304	-0.340855	0.751678	-0.453459	0.650218	NA
IL19	0.0158593	0.652178	3.68146	0.177152	0.859389	NA
IL20	0.0112737	0.789235	4.83567	0.163211	0.870352	NA
IL24	0.222539	0.76491	0.639662	1.1958	0.231774	NA
FAIM3	16.5307	0.365611	0.188035	1.94438	0.0518498	0.190073
PIGR	0.292926	1.33743	3.5043	0.381654	0.702718	NA
YOD1	1.34162	0.845136	0.42915	1.96933	0.0489156	NA
PFKFB2	0.527903	0.207225	0.487631	0.424962	0.670864	NA
CD55	62.3193	-0.132011	0.172735	-0.764239	0.444725	0.657454
CR1	2.34916	0.631534	0.421236	1.49924	0.133811	0.330411
CD46	11.8151	0.461021	0.236827	1.94666	0.0515754	0.189821
CD34	0.00143991	0	5.84738	0	1	NA
PLXNA2	0.18992	0.601878	0.773654	0.777968	0.436588	NA
MIR205HG	0.0987109	0.649192	5.84739	0.111023	0.911598	NA
LAMB3	0.0543585	0.73964	1.14186	0.647751	0.517146	NA
RP1-28O10.1	0.30324	0.224507	0.633862	0.354189	0.723197	NA
G0S2	3.53709	-1.47228	0.381449	-3.8597	0.000113527	0.00377555
TRAF3IP3	33.5157	0.538853	0.240634	2.2393	0.0251361	0.121215
IRF6	0.0706983	0.64785	0.988004	0.655716	0.512007	NA
DIEXF	2.23992	0.789623	0.372799	2.1181	0.0341669	0.147173
RCOR3	4.53675	0.688215	0.311433	2.20983	0.027117	0.127247
TRAF5	10.9692	0.685184	0.272649	2.51306	0.0119689	0.0769329
SLC30A1	1.92029	0.497332	0.396686	1.25372	0.209945	0.432651
NEK2	0.0524239	0.63056	1.83706	0.343244	0.731415	NA
LPGAT1	7.59243	0.660017	0.270412	2.44079	0.0146553	0.0871173
INTS7	0.948278	0.529061	0.455932	1.1604	0.245888	NA
DTL	0.101716	0.581058	1.98746	0.292363	0.770009	NA
PPP2R5A	5.994	0.300242	0.257511	1.16594	0.243639	0.47148
TMEM206	1.39906	0.577898	0.413205	1.39858	0.16194	NA
NENF	10.2022	0.120945	0.160248	0.754732	0.45041	0.660715
ATF3	3.92634	0.414203	0.378743	1.09363	0.274119	0.502189
BATF3	0.186739	0.468543	0.680513	0.688515	0.491129	NA
NSL1	5.58188	0.197971	0.253532	0.780854	0.434888	0.649545
TATDN3	2.44754	1.0668	0.320276	3.33087	0.000865761	0.0142677
FLVCR1-AS1	0.522287	0.546883	0.48096	1.13707	0.25551	NA
FLVCR1	1.62263	0.614998	0.421839	1.4579	0.144869	NA
VASH2	0.0819155	0.54683	0.995267	0.54943	0.58271	NA
ANGEL2	5.12882	0.26471	0.299715	0.883206	0.377125	0.599551
RPS6KC1	1.5495	0.464606	0.431084	1.07776	0.28114	NA
SMYD2	2.52576	-0.201657	0.335885	-0.600374	0.548257	0.735693
PTPN14	0.169817	0.563882	0.606517	0.929706	0.352523	NA
CENPF	1.61211	1.40267	0.497238	2.82092	0.0047886	NA
KCTD3	0.290244	0.797138	0.706255	1.12868	0.259032	NA
GPATCH2	8.08545	0.135964	0.227656	0.597236	0.55035	0.737161
RRP15	7.7602	0.312689	0.200458	1.55987	0.118791	0.308705
LYPLAL1	6.74462	0.632691	0.232237	2.72433	0.00644326	0.0533302
EPRS	11.159	0.271657	0.225078	1.20695	0.227452	0.453593
BPNT1	1.40821	0.361614	0.418082	0.864935	0.387074	NA
IARS2	5.52756	0.431606	0.276471	1.56112	0.118495	0.308044
RAB3GAP2	6.4032	0.94091	0.28543	3.29647	0.000979091	0.0154748
2024-03-01	0.0280905	0.807572	1.83579	0.439904	0.660007	NA
HLA-AS1	0.0104191	0.636567	5.84737	0.108864	0.913311	NA
HLX	0.174467	0.514263	0.976652	0.526557	0.598501	NA
DUSP10	6.53765	0.318203	0.256706	1.23956	0.215137	0.438063
TAF1A	0.969294	1.52238	0.426175	3.5722	0.000353997	NA
RP11-378J18.3	0.293312	0.593211	0.520954	1.1387	0.254827	NA
MIA3	10.3155	0.702848	0.245603	2.86173	0.00421341	0.0407701
RP11-378J18.8	0.285381	0.690605	0.58169	1.18724	0.235133	NA
AIDA	9.78437	0.648247	0.2171	2.98595	0.00282702	0.0312922
BROX	6.70195	0.781067	0.234465	3.33127	0.000864507	0.0142677
RP11-452F19.3	2.1527	0.641288	0.317516	2.0197	0.0434143	0.169591
DISP1	0.298015	0.842238	0.555786	1.5154	0.129671	NA
TLR5	0.228858	0.532039	0.570199	0.933077	0.35078	NA
SUSD4	0.56299	0.299782	0.51487	0.582247	0.560401	NA
CAPN2	13.9806	0.0119051	0.214663	0.0554594	0.955773	0.977892
TP53BP2	4.49163	0.371636	0.331665	1.12052	0.262494	0.490389
RP11-504P24.8	0.326615	0.239891	0.558819	0.429282	0.667718	NA
RP11-504P24.6	0.117814	0.870557	0.704146	1.23633	0.216336	NA
FBXO28	3.93352	0.480415	0.294267	1.63259	0.102556	0.283055
DEGS1	7.41863	-0.0650192	0.197468	-0.329264	0.741956	0.863335
NVL	3.10547	1.29535	0.363384	3.5647	0.000364276	0.00840273
CNIH4	5.80764	0.566221	0.264631	2.13966	0.032382	0.142584
WDR26	7.53815	0.482172	0.254701	1.89309	0.0583462	0.202815
CNIH3	0.279027	0.513394	0.52665	0.97483	0.329645	NA
DNAH14	0.151903	0.34702	0.652665	0.531698	0.594935	NA
LBR	12.3728	0.42611	0.219843	1.93824	0.0525935	0.19172
SRP9	21.2103	0.129671	0.150671	0.860623	0.389446	0.610851
EPHX1	0.0909488	0.524118	0.742219	0.70615	0.480095	NA
RP11-285F7.2	1.53775	0.626405	0.437814	1.43075	0.152501	NA
TMEM63A	8.64421	0.541643	0.313319	1.72873	0.0838573	0.251938
PYCR2	3.96357	-0.0186193	0.314926	-0.0591228	0.952854	0.97654
SDE2	9.26229	0.313603	0.215945	1.45224	0.146436	0.348985
H3F3A	229.139	-0.20975	0.0713784	-2.93857	0.00329735	0.0351252
ACBD3	10.9698	0.576513	0.213917	2.69503	0.00703825	0.056915
LIN9	0.366233	0.421801	0.513448	0.821508	0.411357	NA
PARP1	23.0121	0.402224	0.182576	2.20305	0.0275911	0.129091
ITPKB	7.25	0.319484	0.325969	0.980104	0.327035	0.553403
ITPKB-AS1	1.46027	0.496331	0.456888	1.08633	0.277333	NA
PSEN2	0.422928	0.649338	0.544516	1.1925	0.233064	NA
ADCK3	2.35473	0.64357	0.361134	1.78208	0.0747365	0.234732
CDC42BPA	0.091847	0.53148	0.793217	0.670031	0.502838	NA
ZNF678	2.53221	0.97331	0.447331	2.17581	0.0295691	0.135321
SNAP47	3.1138	0.357176	0.317537	1.12483	0.26066	0.488316
JMJD4	1.50244	0.475738	0.399614	1.19049	0.233852	NA
ARF1	32.7161	-0.109347	0.117243	-0.932652	0.351	0.576258
C1orf35	6.90657	0.30977	0.230559	1.34356	0.17909	0.394089
MRPL55	10.5492	0.073689	0.185129	0.398041	0.6906	0.832985
GUK1	51.275	-0.208905	0.116123	-1.799	0.072018	0.23055
GJC2	0.0468603	0.501458	1.38484	0.362106	0.717273	NA
IBA57	3.01375	0.198262	0.332493	0.596288	0.550983	0.737608
OBSCN	0.742173	0.30483	0.471002	0.647195	0.517506	NA
TRIM11	3.24743	0.436279	0.348429	1.25213	0.210522	0.432948
RNF187	5.9832	0.394344	0.252312	1.56292	0.118071	0.307375
RHOU	0.266065	0.476498	0.581607	0.819279	0.412628	NA
RAB4A	11.4195	-0.15126	0.181478	-0.833489	0.404569	0.623317
CCSAP	1.78896	0.219631	0.406097	0.540835	0.588621	NA
NUP133	1.52161	0.587902	0.413075	1.42323	0.154668	NA
ABCB10	0.945144	0.202805	0.459231	0.441618	0.658765	NA
TAF5L	1.73765	0.18245	0.374955	0.486591	0.626548	NA
URB2	0.847707	0.265683	0.432486	0.614316	0.539007	NA
GALNT2	4.05598	-0.261061	0.282904	-0.922788	0.356118	0.582072
COG2	3.35919	0.572554	0.348125	1.64468	0.100036	0.280183
C1orf198	0.345785	0.498729	0.540392	0.922901	0.356059	NA
TTC13	2.05754	0.805972	0.415046	1.94189	0.0521509	0.190769
ARV1	1.45763	0.663994	0.430081	1.54388	0.122617	NA
FAM89A	1.01129	0.110339	0.432335	0.255216	0.798556	NA
C1orf131	6.16401	0.580615	0.25396	2.28624	0.0222401	0.112762
GNPAT	4.79841	0.375389	0.246005	1.52594	0.127025	0.320624
EXOC8	2.11128	0.501337	0.369668	1.35618	0.175041	0.38832
SPRTN	4.97548	0.157902	0.242834	0.650247	0.515533	0.711215
EGLN1	4.49452	0.574056	0.295705	1.94131	0.0522205	0.190769
RP11-295G20.2	0.730145	0.14578	0.44286	0.329178	0.742022	NA
TSNAX	5.27134	0.680443	0.292141	2.32916	0.0198505	0.105343
DISC1	0.583661	0.458606	0.485349	0.944899	0.34471	NA
SIPA1L2	0.121345	0.602607	0.842111	0.71559	0.474244	NA
MAP10	0.333161	0.705031	0.596768	1.18142	0.237437	NA
NTPCR	2.56109	0.773825	0.395167	1.95822	0.0502042	0.186727
PCNXL2	2.69884	0.741408	0.415847	1.78289	0.0746046	0.234485
MLK4	0.135935	0.346444	0.634512	0.546001	0.585065	NA
KCNK1	0.0376196	0	1.3108	0	1	NA
SLC35F3	0.0616493	0	1.26523	0	1	NA
RP5-827C21.6	0.0554477	0.809955	1.57109	0.515538	0.606177	NA
RP5-827C21.4	2.28365	0.337877	0.392838	0.860092	0.389738	0.611051
COA6	4.19303	-0.130386	0.274614	-0.474797	0.634932	0.794391
TARBP1	3.31639	0.786172	0.381792	2.05916	0.0394787	0.160767
IRF2BP2	20.4105	-0.069766	0.182282	-0.382736	0.701915	0.839909
RP11-443B7.1	0.0862364	0.612972	1.38878	0.441374	0.658942	NA
RP11-443B7.3	0.0161415	0	3.93803	0	1	NA
TOMM20	42.025	-0.0159233	0.0968828	-0.164356	0.869451	0.934236
RBM34	4.05191	0.784604	0.32366	2.42416	0.0153439	0.0897653
ARID4B	52.3366	0.629732	0.143523	4.38769	1.14563e-05	0.000752471
GGPS1	9.36839	-0.0876126	0.218856	-0.40032	0.68892	0.832183
TBCE	0.765774	0.368541	0.449089	0.820642	0.41185	NA
B3GALNT2	1.86307	0.591522	0.418606	1.41308	0.157633	NA
LYST	15.4825	0.428179	0.204812	2.0906	0.036564	0.152947
NID1	0.0191151	0.764565	2.00148	0.382	0.702461	NA
GPR137B	1.36278	-0.0374203	0.420244	-0.0890442	0.929047	NA
ERO1LB	12.9114	0.323565	0.177522	1.82268	0.0683523	0.223195
EDARADD	0.39055	0.491927	0.520018	0.94598	0.344159	NA
LGALS8	6.6445	0.740909	0.326179	2.27148	0.0231181	0.115648
LGALS8-AS1	0.0580484	0.690984	1.27533	0.541807	0.587951	NA
RP11-385F5.4	0.0549974	0.691126	1.28748	0.536805	0.591402	NA
HEATR1	4.46013	1.05985	0.338454	3.13144	0.00173949	0.0232657
MTR	6.05895	0.644751	0.325386	1.9815	0.0475357	0.180588
GREM2	0.417049	0.558005	0.568956	0.980751	0.326715	NA
FH	2.37972	-0.36422	0.296458	-1.22857	0.219233	0.442965
KMO	2.03881	1.0536	0.447082	2.35661	0.0184428	0.100415
OPN3	2.83882	0.0148208	0.26588	0.0557425	0.955547	0.977877
CHML	2.00936	0.760325	0.426968	1.78076	0.0749524	0.23496
WDR64	0.0406863	0	1.63967	0	1	NA
EXO1	0.0482364	0.452314	1.84306	0.245415	0.806135	NA
CEP170	5.23255	0.187794	0.283834	0.661631	0.508208	0.707142
SDCCAG8	9.82303	0.0600386	0.244446	0.24561	0.805984	0.899422
AKT3	4.25724	-0.2457	0.348956	-0.704099	0.481371	0.686093
ZBTB18	3.39242	0.200494	0.324086	0.618645	0.53615	0.727781
RP11-518L10.5	0.0355576	0	2.73036	0	1	NA
ADSS	9.10942	-0.0859461	0.234837	-0.365982	0.714378	0.846182
C1orf101	0.0744598	0.807685	1.02731	0.786212	0.431743	NA
DESI2	5.64182	-0.13179	0.232387	-0.567113	0.570638	0.751788
COX20	14.8209	-0.029448	0.163821	-0.179757	0.857343	0.928004
HNRNPU-AS1	7.94056	0.545123	0.271226	2.00985	0.0444471	0.171988
HNRNPU	50.1468	0.691959	0.16033	4.31584	1.58999e-05	0.000970158
RP11-156E8.1	0.524625	0.173179	0.463896	0.373315	0.708914	NA
EFCAB2	1.58753	0.193411	0.391564	0.493945	0.621345	NA
SMYD3	2.48493	-0.206557	0.310381	-0.665494	0.505734	0.705477
TFB2M	2.11102	0.563087	0.329458	1.70913	0.0874269	0.257674
CNST	8.41017	0.315834	0.263861	1.19697	0.231319	0.458354
SCCPDH	1.41895	0.646404	0.399087	1.61971	0.105296	NA
AHCTF1	5.78172	0.414055	0.314937	1.31472	0.188603	0.406262
ZNF670	0.584249	0.387186	0.464158	0.834169	0.404186	NA
ZNF669	2.19976	1.11586	0.317487	3.51466	0.000440319	0.00951023
ZNF124	2.83838	0.898074	0.336868	2.66595	0.00767712	0.0598099
RP11-488L18.10	3.18458	0.488777	0.349334	1.39917	0.161762	0.372284
ZNF496	0.800737	0.147981	0.480456	0.308002	0.758081	NA
NLRP3	0.864197	0.171512	0.43139	0.397581	0.690939	NA
GCSAML	0.00540608	0.745943	5.84735	0.127569	0.89849	NA
TRIM58	0.184251	0.261573	0.882349	0.29645	0.766886	NA
SH3BP5L	0.755823	0.456691	0.454271	1.00533	0.314739	NA
ZNF672	2.92146	-0.00140257	0.267472	-0.00524379	0.995816	0.996356
ZNF692	2.81136	0.749348	0.435755	1.71965	0.0854954	0.254674
PGBD2	1.42492	0.00767293	0.390226	0.0196628	0.984312	NA
SH3YL1	11.6076	0.285099	0.287078	0.993104	0.320659	0.547508
ACP1	17.5946	-0.172171	0.139208	-1.23679	0.216163	0.438941
TMEM18	6.04235	-0.122465	0.211653	-0.578613	0.56285	0.747127
AC116614.1	0.075408	0.701987	0.939666	0.74706	0.455027	NA
TPO	0.0679049	0	1.05351	0	1	NA
MYT1L	0.0459647	0	1.35518	0	1	NA
TSSC1	2.69996	0.511108	0.307875	1.66011	0.0968913	0.27408
TRAPPC12	2.52222	-0.15826	0.342438	-0.462156	0.64397	0.799286
TRAPPC12-AS1	0.099907	0.635225	0.952171	0.667134	0.504687	NA
ADI1	11.1483	0.00542037	0.18478	0.0293341	0.976598	0.9896
AC142528.1	0.504297	0.590883	0.460462	1.28324	0.199408	NA
AC108488.4	0.0635984	0.712314	1.13903	0.62537	0.531728	NA
RNASEH1	6.27101	-0.475351	0.21126	-2.25007	0.0244443	0.119439
RNASEH1-AS1	1.73639	0.207078	0.340272	0.608567	0.542812	NA
RPS7	830.643	-0.133095	0.0344287	-3.86583	0.000110711	0.00371536
CMPK2	1.09968	-1.37689	0.563392	-2.44393	0.0145284	NA
RSAD2	0.985037	-0.817376	0.600289	-1.36164	0.173312	NA
RNF144A	0.942772	0.128507	0.4766	0.269634	0.787442	NA
AC092580.4	2.73267	0.43665	0.497681	0.87737	0.380286	0.603406
LINC00299	0.035619	0.67312	1.38441	0.486214	0.626815	NA
AC011747.4	0.0732216	0.611519	4.55336	0.1343	0.893165	NA
ID2	22.4647	0.143237	0.224577	0.637806	0.5236	0.717472
RP11-434B12.1	0.0531803	0.634696	1.06816	0.594195	0.552382	NA
KIDINS220	6.49113	0.79705	0.302404	2.63572	0.00839596	0.0631188
MBOAT2	0.12203	0.577242	0.861108	0.670348	0.502636	NA
ASAP2	0.0468859	0.611788	1.98616	0.308025	0.758063	NA
ITGB1BP1	9.8199	-0.0900233	0.205235	-0.438636	0.660926	0.81266
CPSF3	2.30831	0.182103	0.364499	0.499599	0.617358	0.783094
IAH1	11.1808	0.0977783	0.182718	0.535132	0.592558	0.766447
ADAM17	8.05037	0.289327	0.232869	1.24245	0.214072	0.437688
RP11-214N9.1	0.313178	0.833159	0.576622	1.4449	0.148487	NA
YWHAQ	24.3545	0.0535344	0.150631	0.355402	0.722289	0.850639
TAF1B	2.61628	0.383114	0.345622	1.10848	0.267656	0.496135
RP11-95D17.1	0.525213	0.36596	0.515453	0.709979	0.477717	NA
GRHL1	0.34625	0.860116	0.59169	1.45366	0.146041	NA
RP11-254F7.2	0.870085	1.32246	0.443719	2.9804	0.00287877	NA
KLF11	4.13122	0.782111	0.289074	2.70557	0.00681871	0.0556887
RRM2	0.188218	0.384293	0.836559	0.459374	0.645966	NA
HPCAL1	8.14966	-0.236692	0.227995	-1.03815	0.299201	0.524953
ODC1	31.0906	-0.294383	0.154528	-1.90504	0.0567747	0.200175
NOL10	2.71434	0.859064	0.350229	2.45286	0.0141724	0.0855766
RN7SL832P	0.259353	0.4171	0.588684	0.708531	0.478616	NA
PDIA6	25.1817	-0.0798909	0.213183	-0.374752	0.707845	0.84277
PQLC3	4.89329	0.486363	0.276529	1.75881	0.0786091	0.242124
ROCK2	3.61126	0.889512	0.379383	2.34463	0.0190461	0.102248
E2F6	1.30585	0.271168	0.399457	0.678842	0.497238	NA
LPIN1	12.4981	-0.142541	0.226267	-0.62997	0.528714	0.721203
TRIB2	6.52673	0.355592	0.333059	1.06765	0.285677	0.514553
NBAS	3.10432	1.09213	0.359368	3.03904	0.00237332	0.0279016
DDX1	6.95087	0.413695	0.22552	1.8344	0.0665941	0.219689
FAM49A	6.17717	-0.327803	0.253657	-1.29231	0.196251	0.414704
SMC6	9.50003	0.813501	0.223065	3.64692	0.000265402	0.0068274
GEN1	2.04196	0.645576	0.422582	1.52769	0.126589	0.32062
RDH14	5.28731	-0.449333	0.212288	-2.11662	0.0342923	0.147369
LINC00954	1.49964	0.886339	0.463314	1.91304	0.0557425	NA
TTC32	3.94403	0.344632	0.312043	1.10444	0.269404	0.497465
RP11-79O8.1	0.125947	0.278957	0.675015	0.413261	0.679415	NA
WDR35	0.590411	0.623258	0.512362	1.21644	0.223816	NA
LAPTM4A	13.8476	0.244961	0.178253	1.37423	0.169371	0.38201
SDC1	0.0829697	1.11914	5.8471	0.191401	0.848211	NA
PUM2	8.17899	0.908763	0.28054	3.23933	0.00119809	0.018089
RHOB	5.42199	0.189597	0.29123	0.651022	0.515032	0.711215
HS1BP3	1.36722	-0.0268962	0.385973	-0.069684	0.944445	NA
C2orf43	1.48519	-0.118922	0.437373	-0.2719	0.785699	NA
ATAD2B	6.27315	0.719379	0.316706	2.27144	0.0231203	0.115648
UBXN2A	7.95966	0.379128	0.243166	1.55914	0.118964	0.308886
MFSD2B	0.0385425	0.735587	1.4245	0.516382	0.605588	NA
C2orf44	0.530406	0.715215	0.531037	1.34683	0.178036	NA
FKBP1B	0.292073	0.606128	0.60989	0.993832	0.320305	NA
SF3B14	23.7724	-0.116615	0.120038	-0.971489	0.331305	0.556547
FAM228B	2.10695	0.352801	0.379784	0.928952	0.352914	0.578628
TP53I3	0.615729	-0.0807323	0.567239	-0.142325	0.886823	NA
ITSN2	27.7847	0.416636	0.172256	2.4187	0.0155759	0.0905236
NCOA1	5.89082	0.376692	0.307498	1.22502	0.220566	0.444565
PTRHD1	12.8556	-0.0687483	0.145224	-0.473394	0.635932	0.794861
CENPO	0.2092	0.860479	0.607595	1.41621	0.156715	NA
ADCY3	0.816198	0.123656	0.461145	0.26815	0.788584	NA
DNAJC27	2.79894	0.329928	0.317121	1.04038	0.298161	0.524
DNAJC27-AS1	0.27804	0.468219	0.565561	0.827884	0.407736	NA
POMC	2.30108	0.414357	0.332373	1.24666	0.212521	0.435543
RP11-458N5.1	0.257119	0.818153	0.574427	1.42429	0.154362	NA
DNMT3A	3.48154	0.150814	0.389556	0.387144	0.698649	0.837359
DTNB	1.33637	0.941611	0.422125	2.23064	0.0257047	NA
ASXL2	4.52174	0.0915695	0.325749	0.281104	0.77863	0.88454
KIF3C	0.16593	0.51758	0.581361	0.89029	0.37331	NA
RAB10	6.9779	0.13115	0.268498	0.488459	0.625225	0.787988
GAREML	0.137926	0.650122	0.668752	0.972142	0.33098	NA
HADHA	23.0556	0.321323	0.143974	2.23182	0.0256269	0.122541
HADHB	7.38186	0.0509317	0.214591	0.237344	0.81239	0.904112
GPR113	0.314069	0.537695	0.577384	0.931261	0.351719	NA
EPT1	1.99099	0.514195	0.388272	1.32432	0.185398	0.402232
SLC35F6	2.36622	0.0657391	0.345698	0.190163	0.849181	0.924739
CENPA	0.0917338	0.887209	1.50584	0.589181	0.55574	NA
MAPRE3	0.638146	0.369703	0.488059	0.757497	0.448752	NA
TMEM214	2.61007	0.253369	0.346376	0.731486	0.464482	0.672501
AGBL5	0.512885	0.646128	0.464881	1.38988	0.164566	NA
OST4	115.411	-0.008995	0.09971	-0.0902116	0.928119	0.965113
EMILIN1	0.0185073	0	2.72719	0	1	NA
KHK	0.444625	0.434235	0.52318	0.829991	0.406544	NA
ABHD1	0.046035	0	1.14033	0	1	NA
PREB	4.24104	0.285333	0.311278	0.916651	0.359326	0.583987
SLC5A6	3.09332	0.459014	0.33819	1.35727	0.174696	0.387788
ATRAID	14.4527	0.0190945	0.165109	0.115648	0.907931	0.955969
CAD	1.20485	0.172164	0.452773	0.380243	0.703765	NA
UCN	0.319926	0.461517	0.531825	0.867798	0.385505	NA
MPV17	3.0164	0.77914	0.337595	2.30791	0.0210042	0.108628
GTF3C2	1.96401	0.507143	0.350475	1.44702	0.147892	0.351565
AC074117.10	0.49955	0.177383	0.503114	0.35257	0.724411	NA
EIF2B4	4.21395	0.20029	0.310061	0.645968	0.5183	0.713187
SNX17	8.46589	-0.0501617	0.199076	-0.251973	0.801062	0.896641
ZNF513	0.917967	0.50311	0.446856	1.12589	0.260213	NA
PPM1G	15.2979	-0.0736098	0.175551	-0.419308	0.674991	0.82276
NRBP1	8.82968	0.269553	0.204905	1.3155	0.188341	0.40611
KRTCAP3	0.523089	0.692298	0.485598	1.42566	0.153966	NA
IFT172	0.46844	0.945676	0.503458	1.87836	0.0603318	NA
FNDC4	0.175767	0.590602	0.585344	1.00898	0.312982	NA
ZNF512	1.64892	0.598018	0.431508	1.38588	0.165783	NA
CCDC121	0.229141	0.609034	0.60686	1.00358	0.31558	NA
GPN1	4.02109	0.133694	0.280502	0.476622	0.633631	0.793203
SUPT7L	2.81455	0.372035	0.325674	1.14235	0.253307	0.480885
SLC4A1AP	3.63713	0.207541	0.297691	0.69717	0.485697	0.689331
MRPL33	19.2276	0.158439	0.14207	1.11522	0.264758	0.49299
RBKS	0.7621	0.295859	0.426377	0.693891	0.48775	NA
BRE	2.88922	0.114738	0.313451	0.366049	0.714328	0.846182
FOSL2	11.5574	-0.387438	0.305908	-1.26652	0.205327	0.427505
RP11-373D23.3	0.269574	0.379786	0.520865	0.729145	0.465913	NA
PLB1	0.200055	0.254624	0.576892	0.441372	0.658943	NA
AC097724.3	0.0454204	0.658433	1.26848	0.519071	0.603711	NA
PPP1CB	55.3635	-0.0662212	0.165811	-0.399377	0.689616	0.832328
SPDYA	0.630102	0.699393	0.496353	1.40906	0.158816	NA
TRMT61B	2.43155	0.63367	0.36133	1.75371	0.0794796	0.243485
WDR43	12.1054	0.583082	0.18885	3.08755	0.00201815	0.0256454
FAM179A	0.11583	0.523458	0.693421	0.754892	0.450314	NA
CLIP4	2.65679	-0.120122	0.395351	-0.303837	0.761252	0.876255
YPEL5	141.142	0.279854	0.175086	1.59838	0.109959	0.294247
LBH	25.7243	0.973494	0.180787	5.38476	7.25398e-08	1.40937e-05
LCLAT1	2.2459	0.168245	0.433332	0.388259	0.697824	0.83714
EHD3	0.857247	0.895929	0.499436	1.79388	0.0728322	NA
MEMO1	2.69183	0.572319	0.35261	1.62309	0.10457	0.285576
DPY30	8.29247	-0.13525	0.219979	-0.614833	0.538665	0.729718
CTC-336P14.1	0.00534052	0	5.8474	0	1	NA
SPAST	3.09852	1.01186	0.350225	2.88916	0.00386267	0.038906
RP11-563N4.1	0.408967	0.846301	0.485897	1.74173	0.0815559	NA
SLC30A6	1.37367	0.795393	0.44136	1.80214	0.0715235	NA
NLRC4	0.104438	0.657371	1.79271	0.366692	0.713849	NA
YIPF4	13.4015	-0.0344816	0.225904	-0.152638	0.878684	0.940025
AL133245.2	0.452115	0.684914	0.519248	1.31905	0.187153	NA
BIRC6	13.8118	0.524742	0.244745	2.14404	0.03203	0.141773
TTC27	1.07073	-0.14625	0.402321	-0.363517	0.716219	NA
RASGRP3	10.952	0.326292	0.293799	1.1106	0.266742	0.495273
FAM98A	3.0034	0.244702	0.328274	0.745419	0.456019	0.666031
CRIM1	0.348473	0.560849	0.587978	0.953861	0.340154	NA
AC007401.2	0.0246358	0.794152	3.31406	0.239631	0.810616	NA
FEZ2	3.98221	0.00408325	0.304107	0.013427	0.989287	0.995218
AC007382.1	0.234468	0.634201	0.703711	0.901224	0.367469	NA
STRN	3.19579	0.0184514	0.348597	0.0529304	0.957787	0.978733
HEATR5B	3.42025	1.11105	0.372829	2.98005	0.00288202	0.0317582
GPATCH11	4.31601	1.12032	0.36069	3.10604	0.00189608	0.0247766
EIF2AK2	10.901	0.00181799	0.285245	0.00637343	0.994915	0.996251
CEBPZ-AS1	7.23151	0.45588	0.228957	1.99112	0.0464682	0.177667
CEBPZ	18.8708	0.332626	0.170159	1.95479	0.0506078	0.187381
NDUFAF7	2.85899	0.297326	0.346143	0.85897	0.390357	0.611121
PRKD3	11.4701	0.509612	0.198591	2.56614	0.0102837	0.0711278
QPCT	0.674112	-0.528081	0.525018	-1.00583	0.314495	NA
AC006369.2	1.29012	0.806169	0.497502	1.62044	0.105139	NA
CDC42EP3	7.53552	0.127505	0.244388	0.521732	0.601857	0.771953
LINC00211	0.0054226	0	5.84739	0	1	NA
RMDN2	0.639037	1.0056	0.486817	2.06567	0.0388595	NA
CYP1B1	1.22456	-0.398939	0.519281	-0.768254	0.442336	NA
CYP1B1-AS1	0.00887401	0.640256	5.84738	0.109495	0.91281	NA
ATL2	2.51075	0.876333	0.344182	2.54614	0.0108922	0.073493
HNRNPLL	2.62069	0.913768	0.455741	2.00501	0.0449615	0.173705
GALM	3.31351	0.470024	0.40612	1.15735	0.247129	0.474488
SRSF7	108.608	0.32306	0.113918	2.8359	0.00456967	0.0423842
GEMIN6	1.65367	0.769964	0.373665	2.06057	0.0393437	NA
DHX57	2.30457	0.238055	0.381694	0.62368	0.532837	0.724773
MORN2	0.735581	0.0130002	0.441338	0.0294563	0.976501	NA
SOS1	5.86883	0.268156	0.33543	0.799441	0.424035	0.640346
MAP4K3	0.995565	0.244765	0.435494	0.562039	0.574089	NA
AC007246.3	1.12477	0.55495	0.422644	1.31304	0.189169	NA
THUMPD2	2.91158	0.883105	0.319855	2.76096	0.00576324	0.0496165
SLC8A1-AS1	0.000963395	0	5.84738	0	1	NA
SLC8A1	0.211473	0.963458	0.628555	1.53281	0.125321	NA
EML4	35.884	0.439333	0.177223	2.47898	0.013176	0.0817464
COX7A2L	31.3835	-0.112573	0.108048	-1.04188	0.297468	0.523404
MTA3	1.34945	1.19622	0.42324	2.82635	0.00470814	NA
OXER1	0.016653	0.645758	5.06106	0.127593	0.898471	NA
HAAO	0.172932	0.497332	1.45112	0.342723	0.731807	NA
AC093609.1	0.18324	0.359875	0.635892	0.565938	0.571436	NA
THADA	3.52654	0.903339	0.358668	2.5186	0.0117823	0.0765746
ZFP36L2	199.311	-0.0627054	0.129422	-0.484503	0.628029	0.789527
AC010883.5	0.32162	0.356418	0.522333	0.682359	0.495012	NA
PLEKHH2	0.250182	0.45462	0.605828	0.75041	0.453008	NA
DYNC2LI1	0.620962	0.0172303	0.437532	0.0393807	0.968587	NA
LRPPRC	7.30094	0.660246	0.23812	2.77274	0.00555862	0.0487403
PPM1B	9.82865	0.302563	0.213476	1.41731	0.156392	0.363546
PREPL	4.79328	1.08442	0.328471	3.30142	0.000961975	0.0153066
CAMKMT	1.60123	0.512037	0.394532	1.29783	0.194345	NA
SRBD1	2.81855	0.550933	0.414109	1.33041	0.183384	0.399153
PRKCE	2.32022	0.65324	0.338552	1.92951	0.0536671	0.193658
EPAS1	0.16489	0.576128	0.882174	0.653078	0.513706	NA
ATP6V1E2	1.93791	1.05124	0.397697	2.64331	0.00820992	0.0624194
RHOQ	9.16905	0.202569	0.253823	0.798072	0.424829	0.64102
PIGF	2.52828	0.335107	0.365118	0.917804	0.358721	0.583357
CRIPT	6.64599	0.253264	0.233416	1.08503	0.277906	0.506363
SOCS5	1.26841	0.719142	0.424219	1.69521	0.0900349	NA
MCFD2	5.6979	0.0900011	0.243375	0.369804	0.711528	0.844432
TTC7A	4.00563	0.397232	0.306519	1.29594	0.194995	0.414168
AC073283.7	0.0134362	0.820822	3.48637	0.235438	0.813869	NA
CALM2	95.5434	0.229497	0.116027	1.97796	0.0479333	0.181373
BCYRN1	0.0344298	0.798598	2.11102	0.378299	0.705208	NA
EPCAM	0.0510398	0.638619	5.84737	0.109215	0.913032	NA
MSH2	2.02869	0.992638	0.428479	2.31666	0.0205225	0.106929
KCNK12	1.07365	0.232757	0.433248	0.537237	0.591104	NA
AC138655.1	0.0241139	0.60957	2.96364	0.205683	0.837039	NA
MSH6	4.26552	0.266369	0.29769	0.894787	0.370901	0.594747
FBXO11	7.99635	0.654174	0.253169	2.58394	0.00976787	0.0694092
AC079807.2	0.157752	0.75873	0.612196	1.23936	0.215213	NA
FOXN2	5.28923	0.870104	0.29844	2.91551	0.0035511	0.0369265
RP11-191L17.1	0.740483	0.75718	0.497493	1.52199	0.128011	NA
PPP1R21	3.02572	0.687274	0.356959	1.92536	0.0541844	0.194668
STON1	0.173583	0.386631	0.630865	0.612857	0.539971	NA
GPR75-ASB3	1.51346	1.62998	0.412203	3.9543	7.67589e-05	NA
CHAC2	1.72768	-0.262742	0.380924	-0.68975	0.490352	NA
ERLEC1	15.7695	0.146738	0.230319	0.637107	0.524055	0.717829
GPR75	0.0576061	0.537149	1.78674	0.300631	0.763696	NA
PSME4	7.21575	0.890374	0.273351	3.25725	0.00112498	0.0171961
ACYP2	5.10824	0.0594425	0.256403	0.231833	0.816668	0.906886
SPTBN1	12.2218	0.215274	0.269531	0.798699	0.424465	0.640629
EML6	1.8106	0.603614	0.514042	1.17425	0.240294	NA
RTN4	18.6041	-0.116516	0.175096	-0.665441	0.505768	0.705477
CLHC1	0.46644	0.948536	0.560357	1.69273	0.090506	NA
RPS27A	1731.94	0.0415407	0.0338342	1.22777	0.219533	0.442965
MTIF2	3.00004	0.452321	0.351125	1.28821	0.197674	0.416861
CCDC88A	8.21501	0.495416	0.413212	1.19894	0.230552	0.457647
AC012358.8	0.194452	0.768075	0.608343	1.26257	0.206744	NA
CCDC104	7.48722	-0.100401	0.270077	-0.371751	0.710078	0.84365
SMEK2	14.0707	0.818738	0.22221	3.68453	0.000229125	0.00617382
RP11-554J4.1	1.47679	0.95732	0.425527	2.24973	0.0244661	NA
PNPT1	5.08099	-0.460777	0.305359	-1.50897	0.131307	0.326411
AC007743.1	0.0632367	0.431933	1.31596	0.328226	0.742741	NA
VRK2	2.55797	0.269709	0.322134	0.837259	0.402447	0.621864
FANCL	1.09096	0.588098	0.526416	1.11717	0.263921	NA
LINC01122	0.00171064	0	5.84739	0	1	NA
BCL11A	9.09821	0.756959	0.235464	3.21476	0.00130556	0.0191629
PAPOLG	3.34203	0.679279	0.353773	1.9201	0.0548457	0.19609
REL	84.4124	-0.160905	0.190885	-0.842942	0.399261	0.618754
PUS10	1.1911	0.25891	0.450554	0.574647	0.56553	NA
PEX13	2.50742	-0.0339081	0.350663	-0.0966971	0.922967	0.963865
KIAA1841	0.571492	0.613739	0.518437	1.18382	0.236482	NA
C2orf74	0.397473	0.918235	0.533918	1.7198	0.085468	NA
AHSA2	7.26479	0.405136	0.310725	1.30384	0.192288	0.411376
USP34	21.7751	0.338782	0.197588	1.71459	0.0864213	0.256141
RP11-355B11.2	0.647938	0.0518325	0.43982	0.117849	0.906187	NA
XPO1	11.3305	0.570608	0.271011	2.10548	0.0352494	0.149224
FAM161A	0.898551	0.0242315	0.450055	0.0538413	0.957062	NA
CCT4	16.5687	0.216626	0.143517	1.50941	0.131194	0.326283
COMMD1	6.17203	-0.538916	0.200554	-2.68713	0.00720679	0.0575841
B3GNT2	4.94017	0.479355	0.287167	1.66925	0.0950671	0.271311
TMEM17	0.0201184	0	3.59258	0	1	NA
EHBP1	2.17472	0.187564	0.383793	0.488712	0.625045	0.787988
AC009501.4	0.283587	0.124454	0.526344	0.236449	0.813084	NA
WDPCP	1.30336	0.541476	0.424422	1.2758	0.202028	NA
MDH1	8.91387	-0.320849	0.190066	-1.68809	0.0913935	0.265235
UGP2	12.5517	0.196202	0.215931	0.908633	0.363544	0.588606
VPS54	1.39663	0.137063	0.415432	0.32993	0.741453	NA
PELI1	13.4558	0.17951	0.203997	0.879965	0.378878	0.60156
AC074289.1	3.57038	0.678391	0.31918	2.12542	0.0335515	0.145541
LGALSL	0.135783	0.920689	0.78122	1.17853	0.238587	NA
RP11-568N6.1	1.01629	0.0559389	0.456407	0.122564	0.902453	NA
AFTPH	9.04494	0.576982	0.243782	2.3668	0.0179428	0.0986389
SERTAD2	3.51024	1.11851	0.312136	3.58341	0.000339138	0.00805097
AC007880.1	0.21845	0.900696	1.77588	0.507182	0.612027	NA
SLC1A4	2.21705	-0.614683	0.416445	-1.47602	0.139938	0.339632
CEP68	3.77548	0.322762	0.334818	0.963991	0.33505	0.560416
RAB1A	12.2188	0.169202	0.176414	0.959118	0.337499	0.561966
ACTR2	29.5719	0.535748	0.158711	3.37562	0.000736505	0.0130299
SPRED2	0.0955442	0.760116	0.716457	1.06094	0.288718	NA
MEIS1	0.0597822	0.457202	2.4111	0.189624	0.849604	NA
ETAA1	1.40163	0.55215	0.438768	1.25841	0.208244	NA
C1D	9.46778	0.315408	0.184744	1.70728	0.0877705	0.258377
WDR92	1.37351	0.0634731	0.445346	0.142525	0.886665	NA
PNO1	6.25712	0.391373	0.223677	1.74973	0.0801654	0.244957
PPP3R1	5.53097	0.801081	0.273252	2.93165	0.00337163	0.0355611
RP11-474G23.3	0.702048	0.12824	0.448322	0.286045	0.774844	NA
CNRIP1	0.00376962	0.745884	5.84736	0.127559	0.898498	NA
PLEK	8.15944	0.284537	0.266998	1.06569	0.286563	0.515293
FBXO48	1.34496	0.249645	0.401545	0.62171	0.534132	NA
APLF	0.711249	0.520536	0.479245	1.08616	0.277409	NA
ARHGAP25	11.1006	-0.31193	0.243282	-1.28218	0.199781	0.419387
AC097495.2	0.0458434	0.657034	1.98796	0.330507	0.741017	NA
GFPT1	3.92591	-0.0811371	0.31723	-0.255768	0.79813	0.894865
NFU1	6.11112	0.302319	0.218693	1.38239	0.166852	0.378921
RP11-427H3.3	6.92767	0.553843	0.42522	1.30249	0.19275	0.411531
AAK1	20.9326	0.83366	0.314428	2.65135	0.00801701	0.0613364
ANXA4	3.34127	-0.0252948	0.289145	-0.0874814	0.930289	0.965873
GMCL1	5.87592	0.810341	0.274367	2.95349	0.00314204	0.0339148
SNRNP27	11.171	0.548434	0.178834	3.06672	0.00216418	0.0266087
MXD1	5.213	0.504881	0.279533	1.80616	0.0708933	0.228462
PCBP1-AS1	2.37553	0.47994	0.374009	1.28323	0.199411	0.418967
PCBP1	33.6902	-0.0933591	0.127794	-0.730542	0.465059	0.672978
AC016700.5	0.168847	0.446569	0.9258	0.48236	0.629551	NA
C2orf42	0.802912	0.460908	0.432705	1.06518	0.286795	NA
TIA1	8.27689	0.786072	0.295804	2.65741	0.00787445	0.0606226
PCYOX1	1.41564	0.690503	0.418081	1.6516	0.0986163	NA
SNRPG	39.1132	-0.160797	0.122521	-1.3124	0.189386	0.407055
FAM136A	7.97542	-0.314049	0.218592	-1.43669	0.150806	0.355606
TGFA	0.0838627	0.489464	0.765436	0.639457	0.522525	NA
ANKRD53	0.025934	0	4.79498	0	1	NA
TEX261	2.31581	0.0513389	0.3441	0.149198	0.881398	0.940693
NAGK	7.7033	0.154004	0.233222	0.660331	0.509041	0.707447
MCEE	2.32923	0.280071	0.36843	0.760175	0.44715	0.659025
MPHOSPH10	9.96137	0.0772388	0.216893	0.356114	0.721755	0.850553
PAIP2B	1.05167	0.371726	0.419459	0.886204	0.375508	NA
ZNF638	15.1762	0.858749	0.257153	3.33945	0.000839443	0.0140855
DYSF	0.0767424	0.894388	1.01991	0.876928	0.380526	NA
EXOC6B	1.04583	0.52145	0.456507	1.14226	0.253346	NA
SPR	0.054178	0.82361	3.5236	0.233741	0.815186	NA
SFXN5	0.813875	0.684772	0.461839	1.48271	0.138152	NA
RAB11FIP5	0.521365	0.201758	0.480317	0.420052	0.674448	NA
SMYD5	0.860296	0.406889	0.446547	0.911191	0.362195	NA
PRADC1	1.92162	0.288674	0.356039	0.810793	0.417484	0.634869
CCT7	11.1208	0.0421139	0.172005	0.244841	0.80658	0.89981
FBXO41	0.665101	0.393724	0.469781	0.838101	0.401974	NA
EGR4	1.71025	0.817135	0.563576	1.44991	0.147083	NA
ALMS1	1.99046	0.624216	0.436193	1.43106	0.152414	0.357604
TPRKB	8.42498	-0.148233	0.192221	-0.77116	0.440612	0.65329
DUSP11	7.16489	0.2597	0.221661	1.17161	0.241354	0.468802
STAMBP	3.46601	0.532173	0.324325	1.64086	0.100826	0.281553
DGUOK	15.4323	0.0597164	0.152977	0.390363	0.696268	0.836154
DGUOK-AS1	0.126374	0	0.604666	0	1	NA
TET3	1.34757	0.179132	0.446176	0.401483	0.688064	NA
BOLA3	5.41829	0.155435	0.253728	0.612604	0.540138	0.730373
BOLA3-AS1	0.165887	0.598595	0.579136	1.0336	0.301323	NA
MOB1A	25.5043	0.238639	0.143028	1.66847	0.0952218	0.271419
MTHFD2	11.5982	-0.274338	0.258766	-1.06018	0.289064	0.516245
SLC4A5	0.377175	0.28008	0.547076	0.511958	0.608681	NA
DCTN1	3.71387	0.433952	0.348507	1.24517	0.213069	0.436362
C2orf81	0.25832	0.271881	0.707107	0.384497	0.70061	NA
WDR54	5.04178	0.23949	0.256774	0.93269	0.35098	0.576258
RTKN	0.0449048	0.689942	2.43514	0.283327	0.776926	NA
INO80B	3.57867	0.39681	0.29335	1.35268	0.176157	0.389741
WBP1	0.667604	0.316714	0.439379	0.720822	0.471019	NA
MOGS	3.20401	0.576588	0.322171	1.7897	0.0735025	0.232406
MRPL53	5.35984	0.599152	0.268523	2.23128	0.0256623	0.122631
CCDC142	0.806548	0.219179	0.480126	0.456503	0.648028	NA
TTC31	2.20806	0.183576	0.366802	0.500478	0.616739	0.783041
LBX2-AS1	0.0384371	0.932674	3.63309	0.256716	0.797398	NA
PCGF1	1.6537	0.205133	0.401273	0.511206	0.609206	NA
AUP1	14.6879	0.265856	0.158308	1.67936	0.0930825	0.26803
HTRA2	3.8731	-0.447717	0.264979	-1.68963	0.0910986	0.26463
LOXL3	0.0137742	0	4.00309	0	1	NA
DOK1	1.77098	-0.287542	0.34559	-0.832031	0.405391	NA
SEMA4F	0.265244	-0.0410415	0.522546	-0.0785414	0.937397	NA
HK2	0.669896	0.362651	0.461534	0.785751	0.432013	NA
POLE4	14.4873	0.342757	0.148398	2.3097	0.0209045	0.108307
EVA1A	0.00470142	0	5.84735	0	1	NA
MRPL19	5.48089	0.160095	0.250458	0.639208	0.522688	0.716887
GCFC2	2.75287	0.581198	0.319208	1.82075	0.0686453	0.223331
RP11-342K6.4	0.0177194	0.562587	5.84737	0.096212	0.923352	NA
SUCLG1	8.5227	-0.188993	0.199056	-0.949444	0.342395	0.567303
DNAH6	0.171243	0.345743	0.554192	0.623869	0.532714	NA
TRABD2A	8.4812	0.843707	0.41539	2.03112	0.0422429	0.167135
TMSB10	1041.68	0.181874	0.105294	1.7273	0.0841144	0.252441
KCMF1	7.36116	-0.0237848	0.211525	-0.112444	0.910471	0.95796
TCF7L1	0.0534387	1.02533	1.62347	0.631568	0.527669	NA
TGOLN2	21.2984	0.900536	0.199766	4.50795	6.54585e-06	0.000508716
RETSAT	1.01959	0.0623467	0.440204	0.141631	0.887371	NA
ELMOD3	3.89932	0.357144	0.307479	1.16152	0.245429	0.472725
CAPG	10.6769	-0.11565	0.221961	-0.521037	0.602341	0.772063
MAT2A	11.7924	-0.125213	0.195208	-0.641435	0.52124	0.715567
GGCX	3.48638	-0.231106	0.273808	-0.844045	0.398644	0.618057
VAMP8	22.9843	-0.0362315	0.157925	-0.229422	0.818541	0.907716
VAMP5	11.6021	-0.202649	0.195157	-1.03839	0.299089	0.524953
RNF181	11.6375	-0.0866765	0.188713	-0.459303	0.646016	0.800796
TMEM150A	1.08497	-0.475113	0.386654	-1.22878	0.219153	NA
USP39	2.80328	0.725403	0.357305	2.03021	0.0423356	0.167236
C2orf68	4.13786	-0.605084	0.290572	-2.08239	0.0373068	0.154751
GNLY	17.2399	-1.58596	0.288205	-5.5029	3.73585e-08	7.88052e-06
ATOH8	0.0285086	0	2.91893	0	1	NA
ST3GAL5	4.05636	0.431271	0.268844	1.60417	0.108677	0.292193
AC105053.4	0.0505361	0.825528	2.13504	0.386657	0.69901	NA
POLR1A	1.01807	0.485424	0.447092	1.08574	0.277596	NA
PTCD3	8.01571	0.85578	0.254401	3.3639	0.000768497	0.0133188
IMMT	5.56918	-0.0321226	0.273143	-0.117604	0.906382	0.954883
RP11-301O19.1	0.200785	0.695943	0.59438	1.17087	0.24165	NA
MRPL35	2.96502	0.105452	0.334325	0.315417	0.752445	0.870601
KDM3A	5.51508	0.826236	0.329376	2.50849	0.0121248	0.0774375
CHMP3	12.5345	0.13397	0.169028	0.792592	0.428016	0.642938
RNF103	3.5855	0.117354	0.299014	0.39247	0.694711	0.83602
RMND5A	4.04619	0.0272034	0.293952	0.0925436	0.926266	0.964579
CD8A	3.85535	-1.39063	0.435189	-3.19546	0.00139606	0.020131
CD8B	5.35044	-0.169863	0.463154	-0.366753	0.713803	0.846182
PLGLB1	0.273307	0.64149	0.581156	1.10382	0.269673	NA
LINC00152	13.2137	-0.968825	0.306467	-3.16127	0.00157081	0.0219144
RP11-1399P15.1	1.83471	-0.166789	0.4891	-0.341013	0.733094	NA
RGPD2	0.95049	1.03181	0.581627	1.77401	0.0760611	NA
KRCC1	6.26308	-0.0973252	0.270654	-0.359592	0.719152	0.848492
THNSL2	0.110163	0.721902	1.17039	0.616805	0.537363	NA
EIF2AK3	6.19757	1.13235	0.294622	3.84339	0.000121347	0.00394671
AC062029.1	2.05156	0.753253	0.473369	1.59126	0.111551	0.297214
RPIA	6.94452	-0.123823	0.221737	-0.558423	0.576555	0.755271
MAL	14.1091	-0.114288	0.414136	-0.275967	0.782573	0.887097
MRPS5	8.91569	-0.0372361	0.237234	-0.156959	0.875277	0.938101
ZNF514	1.0926	0.293637	0.492533	0.596177	0.551057	NA
ZNF2	0.587773	0.696379	0.557686	1.24869	0.211777	NA
FAHD2A	2.23853	0.192212	0.331582	0.579681	0.56213	0.746574
RP11-440D17.3	0.197628	0.750966	1.52234	0.493298	0.621802	NA
LINC00342	1.56142	0.606142	0.448201	1.35239	0.176251	NA
ANKRD36C	18.3581	0.993643	0.275383	3.60822	0.000308305	0.00763262
GPAT2	0.308544	0.533988	0.567548	0.940868	0.346772	NA
DUSP2	84.5777	-0.0964745	0.243053	-0.396928	0.691421	0.833702
STARD7	8.89537	0.162213	0.199226	0.814218	0.41552	0.63334
TMEM127	2.39185	0.267327	0.356857	0.749116	0.453787	0.664217
CIAO1	5.35529	0.143739	0.284644	0.50498	0.613573	0.780632
SNRNP200	13.7493	0.617117	0.22282	2.76958	0.00561285	0.048983
AC021188.4	0.223805	0.556417	0.57028	0.975691	0.329218	NA
ITPRIPL1	0.445366	0.538752	0.529222	1.01801	0.308675	NA
NCAPH	0.303392	0.467296	0.560244	0.834094	0.404228	NA
RP11-363D14.1	0.0220336	0.62533	2.42678	0.257679	0.796654	NA
ARID5A	28.4489	-0.670081	0.217945	-3.07454	0.00210829	0.0262046
KANSL3	2.27759	-0.00466304	0.38584	-0.0120854	0.990357	0.995346
LMAN2L	0.488206	0.282614	0.515422	0.548317	0.583474	NA
CNNM4	0.775414	0.460547	0.438373	1.05058	0.293451	NA
CNNM3	1.35332	0.956027	0.433765	2.20402	0.0275228	NA
ANKRD23	0.375894	0.705077	0.664748	1.06067	0.288841	NA
ANKRD39	4.41606	0.151943	0.28581	0.531623	0.594987	0.768374
SEMA4C	0.749729	0.188001	0.471889	0.398402	0.690334	NA
FAM178B	0.0343137	0	1.16812	0	1	NA
FAHD2B	1.28176	-0.0363264	0.42339	-0.0857989	0.931626	NA
ANKRD36	23.5136	0.441527	0.247062	1.78711	0.0739202	0.233028
AC159540.1	6.74542	0.395269	0.364274	1.08509	0.277883	0.506363
COX5B	50.2248	-0.00484821	0.0998075	-0.0485756	0.961258	0.980589
ACTR1B	4.88979	-0.130245	0.271604	-0.479542	0.631553	0.792042
LINC01125	0.259014	0.458164	0.530381	0.863839	0.387676	NA
ZAP70	6.27753	0.766097	0.418139	1.83216	0.0669278	0.220396
TMEM131	6.36394	0.660234	0.275426	2.39714	0.0165238	0.0936983
VWA3B	0	NA	NA	NA	NA	NA
INPP4A	6.94453	0.163629	0.346778	0.471857	0.637029	0.794861
COA5	4.23768	0.20523	0.254957	0.804958	0.420844	0.637483
UNC50	3.93607	-0.284731	0.25679	-1.10881	0.267512	0.496085
MGAT4A	20.2769	-0.181045	0.238238	-0.759933	0.447295	0.659025
AC109826.1	0.905986	0.446634	0.4476	0.997841	0.318356	NA
KIAA1211L	0.0581719	0.718013	0.877274	0.81846	0.413095	NA
TSGA10	2.66327	0.361985	0.343153	1.05488	0.29148	0.517681
C2ORF15	0.531629	0.45003	0.464691	0.968449	0.33282	NA
LIPT1	1.16886	0.754981	0.408618	1.84764	0.0646538	NA
MRPL30	0.0856517	0.757919	0.878996	0.862255	0.388547	NA
MITD1	9.23122	0.583155	0.236107	2.46988	0.0135158	0.0829046
LYG2	0.390031	0.3868	0.519333	0.744802	0.456391	NA
LYG1	0.10279	0.697784	1.02348	0.681773	0.495382	NA
TXNDC9	4.93272	-0.431713	0.256592	-1.68249	0.0924741	0.267063
EIF5B	34.8935	0.00582433	0.152879	0.0380977	0.96961	0.985223
REV1	7.79881	0.71986	0.27303	2.63656	0.00837513	0.0630955
AFF3	12.5593	0.8948	0.243366	3.67676	0.000236214	0.00629591
LONRF2	0.083063	0.507201	0.922593	0.549756	0.582487	NA
CHST10	0.513621	0.560625	0.542168	1.03404	0.301116	NA
PDCL3	7.22973	-0.164791	0.23083	-0.713903	0.475287	0.680387
NPAS2	0.064724	0.47882	0.81173	0.589876	0.555274	NA
RPL31	820.005	-0.0191025	0.0475711	-0.401556	0.688011	0.831963
TBC1D8	0.0914046	0.579193	1.09638	0.528276	0.597308	NA
CNOT11	3.2632	0.112947	0.303534	0.372106	0.709814	0.84365
RNF149	13.3684	0.0714654	0.230013	0.310702	0.756027	0.871924
MAP4K4	15.9769	0.778719	0.23119	3.36831	0.000756311	0.0132006
IL1R2	0.0677527	0.671633	1.06575	0.6302	0.528564	NA
IL1R1	0.155488	0.143851	0.70625	0.203683	0.838601	NA
IL1RL2	0.0106474	0.814126	5.84733	0.13923	0.889268	NA
IL18R1	0.87423	0.133282	0.501493	0.26577	0.790416	NA
IL18RAP	0.265782	0.391619	0.593356	0.660007	0.50925	NA
MFSD9	0.618494	0.323953	0.450911	0.71844	0.472486	NA
TMEM182	0.489723	0.643304	0.49804	1.29167	0.196471	NA
MRPS9	3.81669	-0.218636	0.263713	-0.829071	0.407064	0.625595
TGFBRAP1	1.53547	0.328528	0.388282	0.846106	0.397494	NA
RP11-332H14.2	2.39718	0.957199	0.381961	2.50601	0.0122102	0.0777811
C2orf49	6.40144	0.415515	0.227843	1.82369	0.0681993	0.222893
FHL2	0.119193	0.570119	0.920169	0.61958	0.535534	NA
NCK2	11.1046	0.295251	0.256711	1.15013	0.25009	0.47711
C2orf40	0.341929	0	0.473676	0	1	NA
UXS1	5.97196	0.0681241	0.278515	0.244597	0.806768	0.89981
SULT1C4	0.00389634	0	5.84738	0	1	NA
GCC2	46.4993	0.199644	0.163803	1.21881	0.222917	0.44778
LIMS1	15.0742	-0.124661	0.217423	-0.573356	0.566404	0.749554
RANBP2	16.3627	0.567034	0.229642	2.46921	0.0135412	0.0829665
CCDC138	1.51022	0.603501	0.421956	1.43024	0.152647	NA
[truncated: 21,457 more rows]

## Sheet: 8w post-STEMI vs control 
Gene Symbol	baseMean	log2FoldChange	lfcSE	stat	pvalue	padj		Genes differentially expressed in antigen processing and presentation
AL627309.1	0.373357	0.558128	0.490283	1.13838	0.254963	NA		Gene Symbol	Gene Description
AP006222.2	1.42431	0.705282	0.425932	1.65586	0.0977511	NA		HLA-DRB5	major histocompatibility complex, class II, DR beta 5
RP4-669L17.10	0.085021	0.821059	1.14466	0.717296	0.473192	NA		HSPA1B	heat shock protein family A (Hsp70) member 1B
RP5-857K21.4	0.00418985	0	5.77146	0	1	NA		KLRD1	killer cell lectin like receptor D1
RP11-206L10.3	0.831219	0.674018	0.481717	1.3992	0.161754	NA		CTSL	cathepsin L
RP11-206L10.2	2.38134	0.718358	0.459917	1.56193	0.118305	0.315778		CIITA	class II major histocompatibility complex transactivator
RP11-206L10.9	0.512066	0.535527	0.480851	1.11371	0.265406	NA
LINC00115	0.870473	0.400925	0.444459	0.902051	0.36703	NA
FAM41C	0.536882	0.382582	0.48702	0.785557	0.432127	NA
NOC2L	9.46851	-0.16302	0.208292	-0.782654	0.433831	0.658506
KLHL17	0.254229	0.622314	0.528373	1.17779	0.238879	NA
PLEKHN1	0.252392	0.379593	0.617806	0.614421	0.538937	NA
RP11-54O7.17	0.0781066	0.806237	0.867911	0.92894	0.35292	NA
HES4	4.92093	-0.0391139	0.34788	-0.112435	0.910478	0.957286
ISG15	40.4541	-0.977225	0.262875	-3.71745	0.000201243	0.00540281
AGRN	0.10425	0.70234	0.879608	0.798469	0.424599	NA
C1orf159	0.686914	0.73837	0.45631	1.61813	0.105634	NA
TNFRSF18	4.17436	-2.35964	0.36261	-6.50737	7.64781e-11	3.13688e-08
TNFRSF4	7.36859	-1.10737	0.424374	-2.60942	0.00906953	0.0708451
SDF4	10.1915	-0.415108	0.202251	-2.05244	0.0401273	0.169582
B3GALT6	2.23921	-0.899534	0.355421	-2.5309	0.0113771	0.08038
FAM132A	0.0865404	0.666198	1.00339	0.663946	0.506725	NA
RP5-902P8.12	0.0923236	1.18874	0.934226	1.27243	0.203219	NA
UBE2J2	7.3689	-0.136072	0.216702	-0.62792	0.530056	0.731724
SCNN1D	0.187305	0.743768	0.62704	1.18616	0.23556	NA
ACAP3	3.34224	-0.229534	0.312949	-0.733453	0.463282	0.682771
PUSL1	2.59089	-0.00650265	0.309188	-0.0210314	0.983221	0.992722
CPSF3L	4.93263	0.000703094	0.249069	0.00282288	0.997748	0.999246
GLTPD1	1.58839	0.271604	0.404913	0.670771	0.502366	NA
DVL1	0.784606	0.209794	0.414481	0.506161	0.612744	NA
AURKAIP1	23.762	-0.367516	0.140507	-2.61564	0.00890608	0.06997
CCNL2	12.1917	0.67723	0.249207	2.71754	0.00657695	0.0570973
RP4-758J18.2	2.61885	-0.616909	0.330615	-1.86594	0.0620494	0.219087
MRPL20	18.3227	-0.575601	0.172513	-3.33657	0.000848183	0.0144763
RP4-758J18.13	0.0817679	0.846927	1.0438	0.811387	0.417143	NA
ANKRD65	0.0282612	0.940318	5.15192	0.182518	0.855176	NA
ATAD3C	0.744377	0.674448	0.483605	1.39463	0.163129	NA
ATAD3B	1.90947	-0.040372	0.35573	-0.11349	0.909642	NA
ATAD3A	1.4152	0.270249	0.380761	0.709761	0.477852	NA
SSU72	25.845	-0.360089	0.126706	-2.84193	0.00448408	0.0443002
AL645728.1	1.23232	0.634299	0.399739	1.58678	0.112562	NA
C1orf233	0.216327	0.550091	0.603172	0.911997	0.36177	NA
RP11-345P4.9	1.66881	0.37874	0.388427	0.97506	0.32953	NA
MIB2	5.83681	0.755995	0.256149	2.95139	0.00316347	0.0347238
MMP23B	0.272485	0.707752	0.523281	1.35253	0.176206	NA
CDK11B	5.21703	0.747801	0.291559	2.56484	0.0103225	0.0767479
SLC35E2B	6.32083	0.702925	0.292359	2.40433	0.0162023	0.0978901
RP11-345P4.7	0.158648	0.749545	0.716661	1.04589	0.295614	NA
CDK11A	16.5612	0.340779	0.189779	1.79566	0.0725488	0.239869
SLC35E2	0.929108	0.830267	0.482764	1.71982	0.0854649	NA
NADK	3.31854	0.516313	0.31695	1.629	0.103313	0.292468
GNB1	12.6901	-0.00183479	0.204029	-0.00899281	0.992825	0.997554
TMEM52	0.13295	0.649555	0.863273	0.752433	0.451791	NA
PRKCZ	1.26237	0.698328	0.438783	1.59151	0.111495	NA
RP5-892K4.1	0.182244	1.00038	0.646133	1.54826	0.12156	NA
C1orf86	13.0184	0.357599	0.165875	2.15584	0.0310963	0.145767
AL590822.2	0.109183	0.622957	0.800338	0.778368	0.436352	NA
AL590822.1	0.0429496	1.06151	1.7806	0.596154	0.551073	NA
SKI	6.12709	-0.0975242	0.284704	-0.342545	0.73194	0.857271
MORN1	0.3145	0.598938	0.50029	1.19718	0.231236	NA
RER1	12.5165	-0.484082	0.176542	-2.74202	0.00610619	0.0546286
PEX10	0.996067	-0.194427	0.404721	-0.480399	0.630944	NA
PLCH2	0.780842	1.08322	0.478806	2.26234	0.0236763	NA
PANK4	1.02657	0.334665	0.442879	0.755659	0.449854	NA
RP3-395M20.12	4.32969	0.0253308	0.258819	0.0978704	0.922035	0.964575
TNFRSF14	19.7236	-0.231879	0.133786	-1.73321	0.0830577	0.259507
RP3-395M20.9	0.541879	0.546334	0.45444	1.20221	0.229281	NA
FAM213B	0.852758	0.632202	0.435619	1.45127	0.146703	NA
MMEL1	0.0994629	0	0.687742	0	1	NA
TTC34	0.16982	0.589434	0.730337	0.807072	0.419625	NA
MEGF6	0.538884	0.767374	0.459809	1.6689	0.0951379	NA
RP11-46F15.2	0.0708914	0.77729	0.949596	0.818548	0.413044	NA
TPRG1L	2.37141	-0.194525	0.333793	-0.582773	0.560046	0.752333
WRAP73	2.63517	-0.332412	0.347405	-0.956841	0.338647	0.57358
TP73-AS1	0.829214	0.256299	0.432456	0.59266	0.553409	NA
SMIM1	0.577327	0.481388	0.46423	1.03696	0.299755	NA
LRRC47	2.75317	0.21336	0.331698	0.643235	0.520072	0.725154
CEP104	3.71642	0.0229467	0.318467	0.0720539	0.942559	0.974638
DFFB	0.880864	1.26721	0.465001	2.72518	0.00642665	NA
C1orf174	3.27214	0.21173	0.301554	0.702128	0.482599	0.697051
NPHP4	0.314258	0.469957	0.52664	0.892369	0.372195	NA
KCNAB2	5.27656	-0.0914704	0.302254	-0.302628	0.762173	0.879016
RPL22	497.763	0.031796	0.0456744	0.696146	0.486337	0.698448
RNF207	0.517287	0.575564	0.529987	1.086	0.277481	NA
ICMT	1.30122	0.0222284	0.4116	0.0540048	0.956931	NA
GPR153	0.0183546	1.02763	2.9732	0.34563	0.729621	NA
ACOT7	0.601158	0.385271	0.472653	0.815124	0.415002	NA
HES2	0.0170701	0.908674	4.54097	0.200106	0.841398	NA
ESPN	0.100951	0.906491	0.672555	1.34783	0.177713	NA
TNFRSF25	11.0135	-0.0850714	0.382711	-0.222287	0.824091	0.915552
NOL9	4.46039	0.471815	0.319932	1.47474	0.140284	0.34674
ZBTB48	1.80349	0.611946	0.394318	1.55191	0.120684	NA
KLHL21	1.61558	0.0368078	0.364644	0.100942	0.919597	NA
PHF13	0.781906	0.747421	0.45263	1.65129	0.09868	NA
THAP3	1.9174	0.0712473	0.372765	0.191132	0.848422	NA
DNAJC11	1.79094	0.0223593	0.405818	0.0550969	0.956061	NA
RP11-312B8.1	0.0162863	0	1.91669	0	1	NA
CAMTA1	13.2975	-0.00960925	0.164957	-0.0582531	0.953547	0.978885
VAMP3	3.56161	-0.162948	0.264656	-0.615697	0.538094	0.73759
PER3	0.699193	0.553219	0.480045	1.15243	0.249144	NA
RP3-467L1.4	0.0817999	0.854251	1.07916	0.791591	0.428599	NA
UTS2	0.408373	0.906774	0.634326	1.42951	0.152858	NA
TNFRSF9	0.387899	-0.0705725	0.552912	-0.127638	0.898436	NA
PARK7	35.4657	-0.699661	0.120189	-5.82135	5.83752e-09	1.23138e-06
ERRFI1	0.951128	1.24208	0.463902	2.67747	0.00741813	NA
SLC45A1	0.0391492	0.823932	1.26816	0.649705	0.515883	NA
RERE	10.6425	0.704646	0.224385	3.14034	0.00168749	0.0232439
ENO1	29.5216	-0.396109	0.157553	-2.51413	0.0119325	0.0825657
ENO1-AS1	0.316186	0.937909	0.491459	1.90842	0.056337	NA
CA6	0.231257	0	0.561387	0	1	NA
GPR157	0.411905	0.353619	0.492395	0.718161	0.472658	NA
H6PD	1.95627	0.200542	0.37987	0.527923	0.597553	0.777826
SPSB1	1.64551	0.40984	0.448748	0.913295	0.361087	NA
SLC25A33	6.5959	0.193513	0.226209	0.855461	0.392296	0.621795
TMEM201	0.191603	0.485614	0.504194	0.963149	0.335473	NA
PIK3CD	6.08962	0.328715	0.293359	1.12052	0.262491	0.494128
RP11-558F24.4	0.859093	0.0597771	0.460035	0.12994	0.896614	NA
CLSTN1	5.22716	0.118102	0.30169	0.391468	0.695451	0.836668
CTNNBIP1	2.17292	0.252664	0.321403	0.786129	0.431792	0.656762
LZIC	3.09242	-0.0976824	0.323941	-0.301544	0.763	0.879646
NMNAT1	0.755598	0.68417	0.466288	1.46727	0.142303	NA
RBP7	0.307221	0.993557	0.510839	1.94495	0.0517809	NA
UBE4B	3.4597	0.188254	0.30982	0.607625	0.543436	0.74094
KIF1B	2.25655	0.180161	0.388599	0.463616	0.642923	0.804525
PGD	2.31447	-0.792842	0.329981	-2.40269	0.0162749	0.0981229
APITD1	0.758463	-0.189791	0.426568	-0.444927	0.656373	NA
DFFA	5.82432	-0.0764319	0.296496	-0.257783	0.796574	0.898253
PEX14	1.02529	0.401054	0.407384	0.984463	0.324888	NA
CASZ1	1.02134	-0.189903	0.418198	-0.454098	0.649759	NA
C1orf127	0.000826858	0	5.77148	0	1	NA
TARDBP	13.4126	0.632967	0.194584	3.25293	0.00114222	0.0177164
RP4-635E18.8	1.14391	1.37432	0.465912	2.94974	0.00318039	NA
SRM	17.1665	-0.629367	0.203312	-3.09558	0.00196428	0.0258758
EXOSC10	5.25101	0.596559	0.322725	1.84851	0.0645292	0.224303
RP4-635E18.7	0.0937145	0.779978	0.995506	0.783499	0.433334	NA
MTOR	2.28529	0.402571	0.414428	0.971389	0.331355	0.565509
UBIAD1	2.68606	0.257423	0.318153	0.809118	0.418447	0.645777
FBXO2	1.04245	0.675401	0.413802	1.63219	0.10264	NA
FBXO44	2.56588	0.842109	0.34534	2.43849	0.0147486	0.0928295
FBXO6	1.09396	0.683286	0.38127	1.79213	0.0731117	NA
MAD2L2	3.56897	-0.497478	0.26815	-1.85522	0.0635644	0.222521
DRAXIN	0.104388	1.07812	1.03884	1.03781	0.299357	NA
AGTRAP	3.30844	1.68319	0.39244	4.28904	1.79447e-05	0.000895175
MTHFR	2.92845	0.756873	0.349039	2.16845	0.0301244	0.143028
CLCN6	1.29648	0.235031	0.390483	0.601898	0.547242	NA
NPPA-AS1	0.0764617	0.872506	1.0477	0.832783	0.404967	NA
KIAA2013	3.99564	-0.0218842	0.281142	-0.0778403	0.937955	0.971975
PLOD1	0.439836	0.703715	0.614098	1.14593	0.251823	NA
MFN2	1.46517	0.403585	0.394907	1.02197	0.306794	NA
MIIP	4.28533	0.601259	0.24825	2.42199	0.0154357	0.0952848
TNFRSF8	0.0812373	0.883251	0.987819	0.894142	0.371246	NA
TNFRSF1B	13.8549	-0.887623	0.224204	-3.959	7.52638e-05	0.00269744
VPS13D	4.13322	0.977877	0.386714	2.52868	0.0114491	0.0806289
DHRS3	1.90007	0.208848	0.429883	0.485825	0.627091	NA
PRDM2	37.1663	0.303647	0.155332	1.95482	0.0506046	0.192982
TMEM51	0.0131118	0.880055	3.69146	0.238403	0.811569	NA
RP3-467K16.4	0.0568004	1.23091	1.82128	0.67585	0.499136	NA
EFHD2	11.5583	-0.248638	0.204467	-1.21603	0.223974	0.451926
CTRC	0.0431509	0.869945	1.4784	0.588438	0.556238	NA
CASP9	2.08067	-0.216326	0.310611	-0.696454	0.486145	0.698425
DNAJC16	1.76806	0.49237	0.393948	1.24984	0.21136	NA
AGMAT	1.44678	-0.141742	0.386347	-0.366878	0.71371	NA
DDI2	3.32465	0.160407	0.342678	0.468099	0.639714	0.802876
PLEKHM2	3.73222	0.26487	0.300858	0.880383	0.378652	0.60934
SLC25A34	0.139941	0.907647	0.853331	1.06365	0.287487	NA
FBLIM1	0.209633	1.11896	0.635358	1.76115	0.0782124	NA
RP11-169K16.9	3.39502	0.214136	0.301245	0.710836	0.477186	0.693107
SPEN	18.1428	0.542546	0.270478	2.00588	0.0448694	0.179663
ZBTB17	2.1749	-0.177666	0.312654	-0.568253	0.569863	0.758209
EPHA2	0.00202866	0	5.77147	0	1	NA
ARHGEF19	0.589404	0.985868	0.467215	2.1101	0.0348501	NA
FBXO42	3.25471	0.273857	0.343169	0.798025	0.424856	0.65074
SZRD1	9.39749	0.0262098	0.189674	0.138183	0.890096	0.949047
NECAP2	14.9474	-0.0692276	0.172479	-0.40137	0.688148	0.833112
RP4-798A10.2	0.580135	0.410494	0.495936	0.827716	0.407832	NA
RP4-798A10.7	0.211641	0.719221	0.542186	1.32652	0.184667	NA
NBPF1	2.43577	0.735095	0.423644	1.73517	0.08271	0.258859
CROCCP2	3.54804	0.738474	0.343385	2.15057	0.03151	0.146675
CROCC	0.823367	0.40088	0.450142	0.890565	0.373163	NA
RP11-108M9.4	2.07224	0.213203	0.385199	0.553488	0.579929	0.765395
RP11-108M9.6	0.719275	1.08106	0.453435	2.38415	0.0171187	NA
ATP13A2	1.7418	0.410054	0.405833	1.0104	0.312303	NA
SDHB	6.91929	-0.156004	0.198281	-0.786781	0.43141	0.656587
PADI2	0.0237607	0	1.70878	0	1	NA
PADI4	0.559662	0.543688	0.478167	1.13703	0.255528	NA
RCC2	6.27514	0.423189	0.260297	1.6258	0.103993	0.294056
ARHGEF10L	0.100325	0.986262	0.902581	1.09271	0.27452	NA
ALDH4A1	0.0532041	0.959585	1.47261	0.651623	0.514644	NA
IFFO2	1.95054	0.1086	0.379923	0.285848	0.774995	0.886961
UBR4	6.83565	-0.428724	0.271115	-1.58133	0.113802	0.309466
RP1-43E13.2	0.254945	0.511991	0.544012	0.941138	0.346634	NA
EMC1	1.93185	0.384984	0.397026	0.969671	0.332211	0.566446
MRTO4	3.84716	-0.207531	0.262294	-0.791216	0.428818	0.654411
AKR7A2	5.77644	-0.230926	0.216472	-1.06677	0.286077	0.519201
PQLC2	0.560816	0.808186	0.460049	1.75674	0.0789619	NA
CAPZB	33.9444	-0.0910459	0.140692	-0.64713	0.517548	0.722317
MINOS1	26.7366	-0.428657	0.13779	-3.11094	0.00186494	0.0249889
NBL1	2.14978	0.248836	0.466952	0.532894	0.594107	0.775374
TMCO4	1.47934	0.913074	0.412337	2.21439	0.0268019	NA
OTUD3	2.65508	0.97876	0.414355	2.36213	0.0181702	0.104761
UBXN10-AS1	0.289918	0.269169	0.506679	0.531241	0.595252	NA
UBXN10	0.0895419	0.798783	1.56048	0.511882	0.608734	NA
CAMK2N1	0.923217	0.740253	0.421556	1.756	0.079088	NA
MUL1	1.61033	0.675567	0.37876	1.78363	0.0744839	NA
CDA	0.382279	0.832771	0.491567	1.69411	0.0902435	NA
PINK1	1.33299	0.212637	0.388417	0.547444	0.584073	NA
PINK1-AS	0.338223	0.698076	0.516412	1.35178	0.176446	NA
DDOST	15.3147	-0.571273	0.182611	-3.12836	0.00175785	0.0239451
HP1BP3	28.5177	0.392518	0.174027	2.2555	0.0241022	0.123317
EIF4G3	4.51305	-0.196559	0.329851	-0.595903	0.55124	0.746556
ECE1	5.12146	-1.03342	0.295861	-3.49294	0.000477739	0.00990771
RP5-1071N3.1	0.177693	0.613034	0.637447	0.961702	0.336199	NA
NBPF3	0.294203	0.634216	0.560033	1.13246	0.257441	NA
USP48	12.0025	0.378721	0.232261	1.63058	0.102978	0.291969
HSPG2	0.0966726	0.920671	1.01397	0.907988	0.363884	NA
RP1-224A6.3	0.0650418	0	1.16769	0	1	NA
LINC00339	1.15664	1.14707	0.437848	2.61979	0.00879839	NA
CDC42	82.1086	0.456841	0.106686	4.2821	1.8514e-05	0.000917373
WNT4	0.00943484	0	5.77147	0	1	NA
ZBTB40	3.07456	0.69658	0.399191	1.74498	0.0809888	0.254551
C1QA	0.146472	1.00303	1.01173	0.991401	0.32149	NA
C1QB	0.108464	0.844964	1.70957	0.494257	0.621125	NA
EPHB2	0.00156995	0	5.77147	0	1	NA
KDM1A	3.24948	0.351173	0.3264	1.0759	0.281972	0.515481
LUZP1	5.30398	-0.00694196	0.314684	-0.0220601	0.9824	0.992211
RP5-1057J7.6	0.814016	0.557184	0.525515	1.06026	0.289026	NA
HNRNPR	21.6145	-0.139767	0.162562	-0.859778	0.389911	0.619345
ZNF436	0.241102	0.713104	0.527275	1.35243	0.176236	NA
C1orf213	0.276213	0.980158	0.568623	1.72374	0.0847546	NA
TCEA3	1.93302	0.408832	0.46191	0.885089	0.376108	0.607617
E2F2	0.308522	0.998451	0.74087	1.34767	0.177764	NA
ID3	23.1261	-0.629861	0.23052	-2.73235	0.00628843	0.0556698
MDS2	1.36923	0.496366	0.444259	1.11729	0.263871	NA
RPL11	1549.18	0.00136483	0.0255358	0.0534478	0.957375	0.980402
TCEB3	6.50219	0.108679	0.240526	0.451838	0.651386	0.810319
RP5-886K2.3	0.651574	0.352864	0.465509	0.758016	0.448441	NA
PITHD1	9.10971	0.169129	0.201187	0.840656	0.400541	0.629383
LYPLA2	4.2082	-0.477259	0.299412	-1.59399	0.110939	0.305037
GALE	0.748495	0.0931673	0.458752	0.203089	0.839066	NA
HMGCL	1.84227	0.599193	0.386344	1.55093	0.120918	NA
FUCA1	1.03646	0.627605	0.424882	1.47713	0.139642	NA
CNR2	2.96544	1.31384	0.426829	3.07814	0.00208294	0.0265144
PNRC2	4.65876	0.774336	0.378226	2.04728	0.0406305	0.170537
SRSF10	17.8451	0.728863	0.187809	3.88086	0.000104086	0.00341541
IFNLR1	0.888039	-0.136978	0.452003	-0.303047	0.761854	NA
STPG1	1.92997	0.662147	0.460105	1.43912	0.150116	0.360542
NIPAL3	5.77526	0.422996	0.318319	1.32885	0.183899	0.404205
RCAN3	24.8843	0.12549	0.21089	0.595049	0.551811	0.746621
RP4-594I10.3	1.64653	0.711906	0.448778	1.58632	0.112667	NA
SRRM1	57.8861	0.608946	0.118986	5.11779	3.09143e-07	3.51139e-05
CLIC4	4.53128	-0.199555	0.294684	-0.677183	0.49829	0.708349
RUNX3	18.2294	-0.729401	0.188604	-3.86737	0.000110014	0.00354689
SYF2	47.2979	0.351347	0.0965637	3.6385	0.000274234	0.00659101
C1orf63	87.664	0.854726	0.146333	5.84098	5.18946e-09	1.16102e-06
RP3-465N24.6	0.126987	0.874166	0.819767	1.06636	0.286262	NA
TMEM50A	20.06	0.041571	0.159272	0.261007	0.794087	0.898253
TMEM57	5.64102	0.189512	0.272988	0.694214	0.487548	0.699003
LDLRAP1	6.15224	0.100523	0.382156	0.263042	0.792518	0.898113
RP11-70P17.1	0.35095	0.399217	0.471535	0.846634	0.397199	NA
MAN1C1	1.05941	0.182471	0.451422	0.404214	0.686055	NA
RP1-187B23.1	2.52868	1.03673	0.474728	2.18385	0.0289734	0.139502
SEPN1	1.00853	1.04288	0.421833	2.47227	0.0134258	NA
MTFR1L	2.43132	0.388962	0.360408	1.07923	0.280487	0.513346
PAQR7	0.470362	1.3449	0.472277	2.84769	0.00440373	NA
STMN1	7.83805	-0.314146	0.233502	-1.34537	0.178507	0.398074
PAFAH2	0.493836	0.426123	0.490431	0.868874	0.384916	NA
PDIK1L	1.3657	0.682232	0.415212	1.64309	0.100364	NA
ZNF593	7.3911	-0.361849	0.211476	-1.71106	0.0870693	0.265853
CNKSR1	0.757441	0.277092	0.563416	0.491808	0.622855	NA
CEP85	0.536514	0.662221	0.49482	1.33831	0.180796	NA
SH3BGRL3	117.913	-0.0839764	0.109729	-0.765305	0.44409	0.665864
UBXN11	3.64191	1.06575	0.351102	3.03544	0.00240188	0.0289891
CD52	339.821	0.396962	0.1177	3.37265	0.000744489	0.0134062
AIM1L	0.11778	0.702781	0.738444	0.951705	0.341247	NA
ZNF683	0.154496	0.87362	0.609941	1.4323	0.152058	NA
DHDDS	3.16322	-0.0122661	0.348763	-0.0351702	0.971944	0.986916
HMGN2	59.9881	0.129409	0.109641	1.1803	0.23788	0.46759
RPS6KA1	3.56059	0.238497	0.326424	0.730635	0.465002	0.683256
ARID1A	8.65427	0.803689	0.246954	3.2544	0.0011363	0.0176617
PIGV	0.662148	1.00243	0.480264	2.08724	0.0368662	NA
ZDHHC18	2.91007	0.0969899	0.362307	0.267701	0.78893	0.896379
GPN2	2.20889	0.0310285	0.327717	0.0946808	0.924568	0.9655
GPATCH3	1.81656	-0.0583018	0.319821	-0.182295	0.855351	NA
NUDC	13.5862	-0.157577	0.163066	-0.966336	0.333876	0.568359
C1orf172	0.125763	0.636587	0.633697	1.00456	0.315109	NA
TRNP1	0.0133453	0	2.60927	0	1	NA
SLC9A1	0.651146	0.269467	0.436925	0.616735	0.53741	NA
WDTC1	2.4849	0.043521	0.346062	0.125761	0.899921	0.953182
TMEM222	3.79798	0.355877	0.282236	1.26092	0.207338	0.432423
SYTL1	13.993	0.224442	0.192366	1.16675	0.243312	0.474228
MAP3K6	0.665621	0.743965	0.485539	1.53225	0.125462	NA
WASF2	31.6246	0.278354	0.136673	2.03665	0.0416855	0.172224
RP1-159A19.4	0.0931713	0.955977	0.754044	1.2678	0.204869	NA
AHDC1	0.932434	0.513776	0.423997	1.21174	0.22561	NA
FGR	4.43206	0.621646	0.293892	2.11522	0.0344115	0.154719
IFI6	10.4261	-0.53825	0.294403	-1.82828	0.0675083	0.230427
FAM76A	6.32299	0.087467	0.250501	0.349169	0.726962	0.854372
STX12	6.30869	0.275346	0.229929	1.19753	0.231102	0.460271
PPP1R8	3.62761	0.168169	0.270292	0.622174	0.533827	0.734348
THEMIS2	5.89555	-0.183882	0.28007	-0.656557	0.511466	0.718036
RPA2	8.56794	-0.328027	0.215585	-1.52156	0.128119	0.330746
XKR8	0.969571	0.491809	0.438098	1.1226	0.261608	NA
EYA3	2.68989	-0.245666	0.377836	-0.650192	0.515568	0.721053
PTAFR	0.58078	-0.104464	0.501375	-0.208355	0.834951	NA
DNAJC8	22.3211	-0.019714	0.145454	-0.135534	0.89219	0.949391
ATPIF1	33.3846	0.165492	0.148654	1.11327	0.265591	0.497175
RP5-1092A3.4	0.662721	0.731596	0.455401	1.60649	0.108166	NA
SESN2	2.98774	-0.182082	0.384729	-0.473273	0.636019	0.801347
MED18	0.842629	0.384026	0.445021	0.862939	0.388171	NA
PHACTR4	8.20741	0.352085	0.256879	1.37062	0.170492	0.387396
RCC1	1.79749	-0.277218	0.355152	-0.78056	0.435061	NA
TRNAU1AP	5.01086	-0.309936	0.254636	-1.21717	0.223538	0.451392
SNHG12	14.1407	0.0610048	0.183665	0.332154	0.739773	0.86379
TAF12	5.84317	-0.0323286	0.229079	-0.141124	0.887772	0.948477
RNU11	2.04554	1.00059	0.542912	1.84301	0.0653274	0.225801
GMEB1	3.16953	-0.35686	0.3018	-1.18244	0.237033	0.467418
YTHDF2	12.07	0.399038	0.160987	2.4787	0.0131864	0.0868465
EPB41	21.2048	0.499436	0.231649	2.156	0.0310835	0.145767
SRSF4	14.2606	0.278971	0.213291	1.30794	0.190893	0.411367
RP11-242O24.5	0.017135	0	2.55521	0	1	NA
MECR	1.10739	0.261135	0.399986	0.652862	0.513845	NA
MATN1	0.2767	0.705437	0.635957	1.10925	0.267321	NA
MATN1-AS1	1.18412	-0.159208	0.380314	-0.418622	0.675492	NA
LAPTM5	134.37	0.335163	0.0912883	3.67148	0.000241152	0.00603806
SDC3	0.075501	1.08991	1.97716	0.551252	0.581461	NA
PUM1	11.1133	0.304468	0.230265	1.32225	0.186085	0.40659
SNRNP40	5.23313	-0.465636	0.233506	-1.99411	0.0461405	0.181877
ZCCHC17	5.2212	0.613398	0.264437	2.31964	0.0203603	0.112324
SERINC2	0.0395972	0.894707	2.22434	0.402235	0.687511	NA
RP11-439L8.4	0.00123853	0	5.77147	0	1	NA
TINAGL1	0.000756936	0	5.77147	0	1	NA
PEF1	4.62207	0.162256	0.235658	0.688524	0.491123	0.701776
RP11-73M7.9	0.0669129	1.03678	1.19613	0.866773	0.386067	NA
SPOCD1	0.0112113	0	4.78254	0	1	NA
RP11-84A19.2	0.12451	0.879236	0.762888	1.15251	0.249112	NA
RP11-84A19.4	0.0848083	0.903722	0.878221	1.02904	0.303462	NA
PTP4A2	38.876	0.38302	0.14979	2.55704	0.0105567	0.0776145
KHDRBS1	26.8076	-0.0741609	0.138039	-0.537245	0.591099	0.773066
RP11-277A4.4	0.0365202	0.974811	1.3461	0.724175	0.468958	NA
TMEM39B	1.99283	-0.238128	0.349729	-0.680895	0.495938	0.706446
KPNA6	7.25652	0.429901	0.234414	1.83394	0.0666629	0.228492
TXLNA	3.08924	-0.0645379	0.335822	-0.192179	0.847602	0.927983
CCDC28B	2.06395	0.357286	0.357579	0.99918	0.317707	0.551525
IQCC	0.217597	0.650169	0.590621	1.10082	0.270974	NA
TMEM234	0.86986	0.0419771	0.438821	0.0956589	0.923791	NA
EIF3I	21.3064	-0.234451	0.122871	-1.90811	0.0563772	0.205954
FAM167B	0.13434	1.06294	0.677505	1.5689	0.11667	NA
LCK	16.3248	0.84793	0.332865	2.54737	0.0108539	0.0785544
HDAC1	9.2568	0.397057	0.220763	1.79857	0.0720873	0.238771
MARCKSL1	19.5817	0.418939	0.182953	2.28987	0.0220286	0.117512
FAM229A	0.667805	0.885764	0.451906	1.96006	0.0499886	NA
BSDC1	13.0993	0.170654	0.211408	0.807226	0.419536	0.646647
ZBTB8A	0.183021	0.616317	0.621752	0.991259	0.321559	NA
ZBTB8OS	10.0201	0.163968	0.206259	0.794964	0.426635	0.652547
RBBP4	15.1964	0.430811	0.187268	2.30051	0.0214194	0.115938
SYNC	3.60997	0.252242	0.294274	0.857167	0.391352	0.620965
KIAA1522	0.0219416	0	1.51515	0	1	NA
YARS	3.4946	-0.124138	0.330117	-0.376041	0.706887	0.843377
S100PBP	3.74107	0.8247	0.368357	2.23886	0.0251652	0.127257
RNF19B	1.53623	0.274203	0.361724	0.758047	0.448423	NA
AK2	4.34001	-0.0725479	0.271339	-0.267369	0.789185	0.896392
ADC	0.226236	0.620952	0.517565	1.19976	0.230234	NA
TRIM62	0.664995	0.690522	0.464123	1.4878	0.136804	NA
ZNF362	0.990678	0.585234	0.43056	1.35924	0.174071	NA
PHC2	1.94811	0.326322	0.38202	0.854202	0.392993	0.622365
SMIM12	6.10485	-0.465929	0.240214	-1.93964	0.0524238	0.196489
DLGAP3	0.191526	0.947208	0.613148	1.54483	0.122388	NA
RP11-244H3.4	0.456462	0.743147	0.512234	1.4508	0.146836	NA
ZMYM6	2.86717	0.562413	0.360963	1.55809	0.119212	0.317054
ZMYM1	1.45181	0.939972	0.446423	2.10556	0.0352423	NA
SFPQ	56.8284	0.321971	0.14161	2.27365	0.0229873	0.119855
ZMYM4	3.98178	0.166112	0.365046	0.455044	0.649078	0.809073
KIAA0319L	3.89935	0.106035	0.334701	0.316804	0.751392	0.871294
NCDN	0.502805	0.593195	0.474253	1.2508	0.211008	NA
RP4-728D4.2	1.62972	0.484183	0.411341	1.17708	0.239162	NA
PSMB2	10.7617	-0.752079	0.184577	-4.0746	4.60941e-05	0.00189261
C1orf216	0.689513	0.0563346	0.453675	0.124174	0.901178	NA
CLSPN	0.512489	-0.201177	0.47336	-0.424998	0.670838	NA
AGO4	1.51855	0.550353	0.418785	1.31417	0.18879	NA
AGO1	2.84041	0.123504	0.346446	0.356489	0.721475	0.851134
RP4-789D17.5	0.019647	0	2.05523	0	1	NA
AGO3	8.28443	0.509865	0.260459	1.95756	0.0502816	0.192347
ADPRHL2	4.10504	-1.19766	0.276886	-4.32546	1.52214e-05	0.000808484
TRAPPC3	8.93212	-0.191539	0.188634	-1.0154	0.309915	0.544527
MAP7D1	6.19978	-0.470633	0.260363	-1.8076	0.0706684	0.236297
THRAP3	24.8376	0.155612	0.154648	1.00623	0.314304	0.548442
SH3D21	0.147495	1.02248	0.800699	1.27698	0.20161	NA
EVA1B	0.694664	-0.220654	0.447315	-0.493286	0.62181	NA
STK40	3.12988	-0.243994	0.301537	-0.809165	0.41842	0.645777
LSM10	11.2748	0.0981739	0.181067	0.542196	0.587684	0.770532
OSCP1	0.0424348	0.936468	1.36657	0.685271	0.493173	NA
MRPS15	12.1521	-0.293731	0.15937	-1.84308	0.0653173	0.225801
CSF3R	1.22511	0.831441	0.424862	1.95697	0.0503512	NA
LINC01137	0.285854	0.563337	0.513389	1.09729	0.272515	NA
ZC3H12A	6.87818	0.0632466	0.236511	0.267415	0.78915	0.896392
MEAF6	14.7843	0.178431	0.167643	1.06436	0.287168	0.519899
SNIP1	3.82995	0.464258	0.30574	1.51847	0.128896	0.332044
GNL2	5.74006	-0.224965	0.244931	-0.918483	0.358366	0.592303
C1orf109	2.83708	0.423003	0.337691	1.25263	0.21034	0.436464
CDCA8	0.155164	0.79971	0.82463	0.969781	0.332156	NA
YRDC	4.53746	0.381609	0.248368	1.53647	0.124424	0.324178
C1orf122	7.19478	-0.11454	0.210131	-0.545088	0.585693	0.769699
MTF1	2.80641	-0.182938	0.319184	-0.573141	0.566549	0.75588
INPP5B	1.89888	0.50062	0.404058	1.23898	0.215353	NA
SF3A3	5.629	0.371083	0.271489	1.36684	0.171674	0.388914
FHL3	0.600524	0.0736991	0.466472	0.157993	0.874463	NA
UTP11L	3.78278	-0.398436	0.275128	-1.44818	0.147566	0.357268
POU3F1	2.0251	0.327458	0.477956	0.685121	0.493268	0.703864
RRAGC	6.53365	-0.0162327	0.222847	-0.0728424	0.941932	0.974262
RP5-864K19.4	0.232564	0.860432	0.674411	1.27583	0.202017	NA
MYCBP	2.81633	-0.0157301	0.347624	-0.0452504	0.963908	0.98281
AKIRIN1	19.4129	0.183332	0.159022	1.15287	0.248962	0.480258
NDUFS5	58.2133	-0.26095	0.111651	-2.3372	0.0194288	0.110145
MACF1	26.4903	1.14514	0.29035	3.94401	8.01292e-05	0.00279054
KIAA0754	0.72947	0.144145	0.497283	0.289865	0.771919	NA
RP11-69E11.4	0.584334	0.592282	0.486021	1.21864	0.222983	NA
PABPC4	25.4815	-0.399971	0.15165	-2.63747	0.00835279	0.0668857
HPCAL4	1.06136	0.533612	0.483591	1.10344	0.269837	NA
PPIE	5.78296	-0.0304752	0.253874	-0.12004	0.904451	0.955555
BMP8B	0.981672	0.607186	0.735001	0.826102	0.408746	NA
OXCT2	0.257825	0.877811	1.30849	0.67086	0.50231	NA
TRIT1	1.11329	0.479968	0.416766	1.15165	0.249466	NA
MYCL	0.0209555	0.99306	3.3164	0.299439	0.764605	NA
MFSD2A	0.377103	0.282339	0.485334	0.581741	0.560741	NA
CAP1	22.9149	0.100091	0.176979	0.56555	0.5717	0.75983
PPT1	5.98351	-0.099136	0.273499	-0.362473	0.716998	0.848896
RLF	8.43317	0.434143	0.272374	1.59392	0.110954	0.305037
RP1-39G22.7	0.770533	0.683994	0.459778	1.48766	0.13684	NA
ZMPSTE24	2.40763	0.351819	0.366367	0.960292	0.336908	0.571598
COL9A2	0.761086	0.343796	0.422838	0.813069	0.416178	NA
SMAP2	45.6995	-0.0476614	0.141518	-0.336788	0.736277	0.860933
ZFP69B	0.485587	0.143167	0.510549	0.280417	0.779157	NA
ZFP69	0.395622	0.622866	0.565951	1.10057	0.271086	NA
RP11-656D10.3	0.178186	1.04483	0.611166	1.70956	0.0873474	NA
EXO5	0.591424	0.30051	0.471294	0.637628	0.523716	NA
ZNF684	0.710541	0.468906	0.436731	1.07367	0.28297	NA
NFYC-AS1	0.747077	0.710242	0.460368	1.54277	0.122887	NA
NFYC	3.8769	0.443465	0.279566	1.58626	0.11268	0.308003
CITED4	1.76342	0.46192	0.457971	1.00862	0.313155	NA
CTPS1	2.22315	-0.34374	0.375182	-0.916194	0.359565	0.593489
SCMH1	1.11448	0.54349	0.400068	1.3585	0.174307	NA
HIVEP3	2.41789	0.0444944	0.38833	0.114579	0.908779	0.956044
FOXJ3	5.68287	0.793578	0.314887	2.5202	0.0117288	0.0821476
PPCS	12.0258	0.242473	0.174915	1.38623	0.165675	0.380461
CCDC30	0.722693	0.544344	0.484216	1.12418	0.260938	NA
PPIH	3.91587	-0.0601209	0.262994	-0.228602	0.819178	0.912354
YBX1	177.29	-0.249228	0.0784468	-3.17703	0.00148791	0.0212892
LEPRE1	1.91258	-0.370174	0.36845	-1.00468	0.315052	NA
C1orf50	3.38174	0.363769	0.299891	1.213	0.225129	0.45339
CCDC23	5.70928	-0.090546	0.226108	-0.400455	0.688822	0.83329
ERMAP	0.389405	0.0582114	0.476877	0.122068	0.902845	NA
RP11-342M1.3	0.0473913	0.834327	1.23212	0.677149	0.498311	NA
ZNF691	0.311351	0.547974	0.552337	0.992101	0.321148	NA
SLC2A1	3.43703	0.177915	0.257869	0.689943	0.49023	0.701071
SLC2A1-AS1	0.211139	0.528736	0.592075	0.893022	0.371845	NA
FAM183A	0	NA	NA	NA	NA	NA
EBNA1BP2	4.81837	-0.0631876	0.257806	-0.245097	0.806381	0.903279
TIE1	0.00978994	0	5.77148	0	1	NA
RP1-92O14.3	0.0752363	0.806934	0.747563	1.07942	0.2804	NA
CDC20	0.11081	0.697748	1.15868	0.602192	0.547046	NA
ELOVL1	2.89804	-0.0139545	0.304357	-0.0458492	0.96343	0.982731
MED8	3.3309	-0.511476	0.273403	-1.87078	0.0613758	0.217332
SZT2	2.07098	0.0813013	0.396395	0.205102	0.837493	0.922316
HYI	2.09797	0.647821	0.373717	1.73345	0.0830155	0.259485
PTPRF	0.0636948	1.32182	2.35425	0.561463	0.574482	NA
KDM4A	1.74586	0.94062	0.428603	2.19462	0.0281909	NA
KDM4A-AS1	0.208907	0.752205	0.53689	1.40104	0.161202	NA
ST3GAL3	0.586786	0.667624	0.447766	1.49101	0.135959	NA
IPO13	0.505285	0.255823	0.467586	0.547114	0.584301	NA
DPH2	1.59748	-0.125437	0.389644	-0.321928	0.747508	NA
ATP6V0B	23.5941	0.0274447	0.147328	0.186283	0.852223	0.930901
B4GALT2	0.295973	0.556666	0.903486	0.616132	0.537808	NA
CCDC24	0.254125	0.620955	0.9951	0.624013	0.532619	NA
DMAP1	4.68632	0.554871	0.280384	1.97897	0.0478194	0.186208
ERI3	2.92211	-0.170666	0.292413	-0.583646	0.559459	0.752042
RNF220	4.96058	0.552689	0.275345	2.00726	0.0447223	0.179521
TMEM53	0.384491	0.826362	0.507455	1.62845	0.10343	NA
C1orf228	6.6191	-0.0700673	0.285673	-0.245271	0.806247	0.903265
KIF2C	0.0327054	0.836644	1.59195	0.525547	0.599203	NA
RPS8	1574.17	0.000543617	0.0340497	0.0159654	0.987262	0.995047
PLK3	20.1631	-0.301218	0.202293	-1.48902	0.136482	0.340998
TCTEX1D4	0.0630275	0	0.806142	0	1	NA
BTBD19	0.655489	0.0999888	0.476736	0.209736	0.833874	NA
PTCH2	1.16168	1.39977	0.476258	2.9391	0.00329165	NA
EIF2B3	1.90203	0.621498	0.371956	1.67089	0.0947435	NA
HECTD3	1.21621	0.578273	0.448681	1.28883	0.197457	NA
UROD	2.62513	0.190319	0.319995	0.594758	0.552005	0.746621
MUTYH	1.9105	0.552485	0.348223	1.58658	0.112607	NA
TOE1	2.91083	-0.0420065	0.299333	-0.140334	0.888396	0.948477
TESK2	1.49642	0.545436	0.354739	1.53757	0.124154	NA
CCDC163P	0.423952	0.514156	0.584471	0.879694	0.379025	NA
PRDX1	26.3023	-0.579336	0.166489	-3.47972	0.000501946	0.0102656
AKR1A1	11.2062	-0.252658	0.172263	-1.4667	0.142458	0.349423
NASP	20.5244	0.56325	0.173032	3.25518	0.0011332	0.0176506
CCDC17	0.164054	0.768244	0.613414	1.25241	0.210422	NA
GPBP1L1	9.63991	0.0997493	0.212178	0.47012	0.638269	0.802304
TMEM69	1.92509	0.296306	0.365397	0.810913	0.417416	0.644724
IPP	1.33475	0.70535	0.43167	1.634	0.102258	NA
MAST2	0.432712	0.731342	0.493131	1.48306	0.138059	NA
PIK3R3	0.216767	0.40321	0.63444	0.635537	0.525078	NA
TSPAN1	0.0236008	0	5.2819	0	1	NA
POMGNT1	1.84522	0.709262	0.415677	1.70628	0.0879557	NA
RAD54L	0.0182731	1.01028	5.77142	0.175049	0.861041	NA
LRRC41	3.31594	-0.652366	0.302943	-2.15343	0.0312849	0.146373
UQCRH	79.7135	-0.0886198	0.088411	-1.00236	0.316169	0.550059
NSUN4	2.22868	0.207985	0.336655	0.617798	0.536709	0.736939
FAAH	0.169321	0.793907	0.538378	1.47463	0.140313	NA
MKNK1	3.76916	1.11197	0.331917	3.35014	0.000807705	0.0141983
MOB3C	0.737212	0.30681	0.436513	0.702865	0.48214	NA
ATPAF1	2.92521	0.40401	0.336779	1.19963	0.230283	0.459137
EFCAB14	10.6904	0.0639937	0.236174	0.27096	0.786422	0.895183
CYP4B1	0.0102007	0	3.78194	0	1	NA
LINC00853	0.024533	0.999535	1.9625	0.509317	0.61053	NA
PDZK1IP1	0.0991374	1.12222	0.817025	1.37354	0.169584	NA
TAL1	0.0805582	1.01613	1.30561	0.778278	0.436405	NA
STIL	0.126955	0.470627	0.750723	0.626898	0.530726	NA
CMPK1	40.112	0.186298	0.135596	1.37392	0.169466	0.385449
RP11-511I2.2	0.0307209	0.864057	3.42321	0.252411	0.800723	NA
FOXD2-AS1	0.0871099	0.748559	0.751357	0.996276	0.319116	NA
FOXD2	0.0705798	0.911898	0.888832	1.02595	0.304915	NA
SPATA6	0.447704	0.268742	0.471517	0.569951	0.568711	NA
BEND5	1.29182	1.25475	0.418919	2.9952	0.00274266	NA
RP5-850O15.4	0.108463	0	0.955731	0	1	NA
FAF1	3.74657	0.143051	0.283549	0.504504	0.613907	0.787142
CDKN2C	0.701529	-0.659053	0.430406	-1.53124	0.125711	NA
RNF11	8.13378	0.3877	0.246828	1.57073	0.116245	0.31357
TTC39A	0.0555349	1.09092	1.12257	0.971804	0.331148	NA
EPS15	11.7817	0.322346	0.209844	1.53612	0.124509	0.324178
OSBPL9	6.26834	0.298329	0.237184	1.2578	0.208466	0.434407
NRD1	13.0755	0.333908	0.230865	1.44634	0.148083	0.357404
RP4-657D16.3	0.15018	0.649685	0.757766	0.857368	0.391241	NA
RAB3B	0.112319	0.646664	0.663958	0.973954	0.330079	NA
TXNDC12	7.71119	-0.134349	0.200538	-0.669943	0.502894	0.711501
KTI12	3.08579	-0.260906	0.286409	-0.910956	0.362319	0.596093
BTF3L4	12.43	0.165764	0.16667	0.994561	0.31995	0.553984
ZFYVE9	0.47774	0.575493	0.528026	1.08989	0.27576	NA
CC2D1B	1.79461	-0.504329	0.399793	-1.26148	0.207138	NA
ORC1	0.115647	0.710029	0.934395	0.759881	0.447326	NA
PRPF38A	11.4729	-0.0244594	0.192626	-0.126979	0.898957	0.953044
ZCCHC11	33.3734	0.351548	0.184372	1.90673	0.0565551	0.206095
GPX7	2.57589	-0.579547	0.301025	-1.92525	0.0541983	0.200474
FAM159A	4.76526	-0.0144309	0.252884	-0.0570655	0.954493	0.979064
COA7	0.536262	0.174201	0.487928	0.357022	0.721075	NA
ZYG11B	2.90526	0.519915	0.364626	1.42589	0.153901	0.365221
ECHDC2	4.07156	0.521379	0.345059	1.51099	0.130792	0.334033
SCP2	14.9812	0.0818577	0.174081	0.470228	0.638192	0.802304
SLC1A7	0.0209207	0.998485	2.79321	0.357469	0.72074	NA
CPT2	0.95506	0.351376	0.409396	0.85828	0.390738	NA
C1orf123	4.27053	-0.209787	0.264549	-0.792997	0.42778	0.654022
RP5-1024G6.7	0.230366	0.414404	0.474652	0.873069	0.382625	NA
MAGOH	15.9078	-0.154426	0.155178	-0.995149	0.319664	0.553619
RP5-1024G6.8	0.135793	0.885698	0.81053	1.09274	0.274508	NA
LRP8	0.390834	0.786575	0.531496	1.47993	0.138893	NA
RP11-117D22.2	0.628289	0.907706	0.571384	1.58861	0.112149	NA
NDC1	0.872991	-0.642436	0.432766	-1.48449	0.13768	NA
YIPF1	1.45356	-0.0245572	0.366743	-0.0669602	0.946613	NA
HSPB11	8.74999	0.106427	0.207444	0.513043	0.607921	0.783432
LRRC42	0.698407	0.518169	0.433346	1.19574	0.231798	NA
RP4-758J24.5	0.124329	0.883472	0.703086	1.25656	0.208911	NA
TMEM59	30.3903	0.0818293	0.132934	0.615565	0.538182	0.73759
TCEANC2	1.16503	0.366014	0.455106	0.804238	0.42126	NA
CYB5RL	0.483237	0.992977	0.594165	1.67121	0.0946794	NA
MRPL37	3.92596	-0.5515	0.248353	-2.22063	0.0263762	0.130986
SSBP3	3.08591	-0.132771	0.358161	-0.370702	0.710859	0.846223
ACOT11	0.0610277	0	0.942247	0	1	NA
TTC4	0.67243	0.66544	0.456042	1.45916	0.144521	NA
TTC22	0.322538	0.919329	0.489801	1.87694	0.060526	NA
C1orf177	0.00834096	0	4.52484	0	1	NA
USP24	6.26785	0.414999	0.316511	1.31117	0.1898	0.411038
OMA1	3.18781	0.38828	0.345595	1.12351	0.261221	0.492617
TACSTD2	0.0362914	0	2.24658	0	1	NA
MYSM1	5.85676	0.590331	0.312953	1.88632	0.0592512	0.212252
JUN	177.445	1.01966	0.218786	4.66054	3.15379e-06	0.000223889
RP4-794H19.1	0.0468691	0.817817	2.77644	0.294557	0.768333	NA
FGGY	0.654804	0.45038	0.435631	1.03386	0.301204	NA
HOOK1	1.79094	1.21495	0.421161	2.88478	0.00391691	NA
NFIA	0.850506	0.540995	0.469584	1.15207	0.249292	NA
TM2D1	8.99804	0.230678	0.22644	1.01871	0.308339	0.543034
RP11-430G17.3	0.138081	0.643529	0.77121	0.83444	0.404033	NA
INADL	4.75193	0.727241	0.370035	1.96533	0.0493757	0.190207
L1TD1	0.232578	0.669047	0.970224	0.68958	0.490458	NA
USP1	10.2201	0.144632	0.204782	0.706272	0.480019	0.695113
DOCK7	0.697155	0.724545	0.496308	1.45987	0.144326	NA
ATG4C	2.3423	0.345339	0.313168	1.10273	0.270145	0.502196
ALG6	1.74249	0.162549	0.390806	0.415934	0.677459	NA
ITGB3BP	4.54835	0.0808761	0.266473	0.303507	0.761504	0.878628
EFCAB7	1.09788	0.71575	0.457031	1.56609	0.117328	NA
DLEU2L	0.539847	0.595442	0.498825	1.19369	0.2326	NA
PGM1	1.8334	-0.215379	0.353184	-0.609821	0.541981	NA
RAVER2	0.212999	0.808193	0.680399	1.18782	0.234903	NA
JAK1	47.0377	0.148309	0.151607	0.978247	0.327952	0.562171
RP4-535B20.1	0.0219775	0	3.77475	0	1	NA
AK4	0.076625	0.812274	1.00884	0.805157	0.420729	NA
DNAJC6	0.0686859	0.798435	0.882391	0.904854	0.365543	NA
LEPR	0.242028	0.644611	0.61865	1.04196	0.297429	NA
LEPROT	4.71036	0.682722	0.305499	2.23477	0.0254322	0.128255
PDE4B	26.453	-0.142734	0.180402	-0.791198	0.428828	0.654411
SGIP1	0.00206308	0	5.77146	0	1	NA
TCTEX1D1	0	NA	NA	NA	NA	NA
WDR78	0.296537	0.808019	0.640284	1.26197	0.206959	NA
MIER1	17.5906	0.408771	0.177593	2.30172	0.0213507	0.115736
SLC35D1	1.79494	0.373412	0.387825	0.962837	0.335629	NA
IL23R	0.0672877	0.829279	1.09395	0.75806	0.448415	NA
IL12RB2	0.114019	0.645784	0.80926	0.797994	0.424874	NA
SERBP1	51.8902	-0.173535	0.112722	-1.5395	0.123682	0.323492
GADD45A	11.1802	0.3281	0.296996	1.10473	0.269277	0.501278
WLS	0.0377662	0.847869	2.34004	0.362332	0.717104	NA
DEPDC1	0.00462483	0	5.77143	0	1	NA
LRRC40	2.67537	0.436333	0.351466	1.24147	0.214433	0.441977
SRSF11	39.0957	0.554315	0.16488	3.36192	0.000774024	0.0138034
ANKRD13C	3.55875	0.122355	0.318139	0.384595	0.700537	0.839528
HHLA3	0.835208	0.606544	0.45752	1.32572	0.184932	NA
CTH	1.35738	0.510056	0.490825	1.03918	0.298721	NA
ZRANB2	24.2942	0.501446	0.188922	2.65425	0.0079486	0.0649165
NEGR1	0.00772974	0	5.77147	0	1	NA
LRRIQ3	0.353788	0.333254	0.527288	0.632014	0.527378	NA
FPGT	0.482763	0.765043	0.47263	1.61869	0.105513	NA
FPGT-TNNI3K	0.0819922	0.805698	0.96943	0.831105	0.405914	NA
C1orf173	0.0451477	0.88381	5.77146	0.153135	0.878292	NA
CRYZ	1.16103	-0.0140444	0.420886	-0.0333687	0.973381	NA
TYW3	5.4451	-0.0737255	0.240115	-0.307043	0.758811	0.876866
ACADM	6.76596	-0.0553898	0.24115	-0.22969	0.818332	0.911962
RABGGTB	12.4616	0.754942	0.182628	4.13377	3.56854e-05	0.0015498
ST6GALNAC3	0.370274	1.37995	0.603173	2.28781	0.0221486	NA
PIGK	2.45121	0.459602	0.345102	1.33179	0.18293	0.402978
AK5	1.88277	0.291287	0.463099	0.628995	0.529352	NA
ZZZ3	5.14039	0.560672	0.307099	1.82571	0.0678947	0.231318
USP33	6.65078	0.884809	0.311779	2.83794	0.00454064	0.0445912
FAM73A	3.42902	1.28179	0.370092	3.46344	0.000533312	0.010758
NEXN	0.413751	0.011183	0.522272	0.0214121	0.982917	NA
FUBP1	11.2726	0.194337	0.217437	0.893759	0.371451	0.602656
DNAJB4	2.38054	0.519773	0.36168	1.43711	0.150688	0.361328
RP11-386I14.4	4.52824	1.85388	0.341407	5.43012	5.63153e-08	7.84483e-06
IFI44L	4.9717	0.10366	0.410093	0.252771	0.800445	0.90019
IFI44	3.02965	-0.0203403	0.410384	-0.0495641	0.96047	0.981881
RP5-887A10.1	17.0158	0.371786	0.259994	1.42998	0.152722	0.363959
RP11-475O6.1	0.655001	0.91653	0.545754	1.67938	0.0930777	NA
TTLL7	0.178386	0.71054	0.898223	0.79105	0.428915	NA
PRKACB	8.37057	0.544279	0.269351	2.02071	0.0433099	0.176573
SAMD13	0.0251559	0	2.75808	0	1	NA
RPF1	9.92929	0.152282	0.180643	0.843	0.399229	0.628527
GNG5	22.202	-0.67956	0.15803	-4.30019	1.70655e-05	0.000876657
CTBS	5.86382	0.285557	0.246619	1.15789	0.246909	0.478334
SSX2IP	0.970262	0.218856	0.462669	0.473029	0.636193	NA
LPAR3	0.0341427	0	1.50127	0	1	NA
MCOLN2	2.27317	0.619016	0.440262	1.40602	0.159719	0.372931
WDR63	0.0318946	0.918088	1.22472	0.749629	0.453478	NA
MCOLN3	0.411312	0.695361	0.518832	1.34024	0.180166	NA
SYDE2	0.592073	0.482351	0.468598	1.02935	0.303316	NA
C1orf52	8.82183	0.105677	0.195405	0.540813	0.588636	0.771233
BCL10	7.57568	0.407208	0.195536	2.08252	0.0372952	0.16178
RP11-131L23.1	0.134741	0.956684	1.36876	0.698944	0.484587	NA
CYR61	0.0461249	0	5.77148	0	1	NA
ZNHIT6	7.04108	0.314047	0.28874	1.08765	0.276752	0.508779
COL24A1	0.0646649	1.13698	3.04573	0.373305	0.708922	NA
ODF2L	19.1864	-0.0130559	0.196598	-0.0664092	0.947052	0.976786
CLCA2	0	NA	NA	NA	NA	NA
RP4-612B15.3	0.30939	0.536927	0.566596	0.947636	0.343315	NA
SH3GLB1	16.7865	-0.045354	0.180322	-0.251516	0.801415	0.900773
2024-09-15	29.5377	0.0710643	0.127046	0.55936	0.575916	0.762807
HS2ST1	2.63173	0.427033	0.386128	1.10594	0.268754	0.500558
LMO4	11.0283	0.314562	0.209055	1.50468	0.132406	0.3362
PKN2	12.12	0.426477	0.234602	1.81788	0.0690825	0.233533
GTF2B	17.4894	0.347511	0.221842	1.56648	0.117237	0.314863
CCBL2	3.15821	0.227511	0.324743	0.700589	0.48356	0.697215
RBMXL1	3.47539	0.329608	0.317455	1.03828	0.299139	0.532436
GBP3	2.27627	0.122804	0.437777	0.280517	0.779081	0.889849
GBP1	4.04835	-1.64632	0.404563	-4.06938	4.71378e-05	0.00192275
GBP2	9.36639	-0.540151	0.297041	-1.81844	0.0689969	0.233351
GBP4	4.24769	-0.25038	0.347965	-0.719554	0.471799	0.688807
GBP5	5.30646	-1.06812	0.375881	-2.84164	0.00448822	0.0443002
LRRC8B	2.5471	-0.200866	0.362071	-0.554769	0.579053	0.764922
RP5-1007M22.2	0.85473	0.39548	0.440664	0.897463	0.369472	NA
LRRC8C	5.36157	0.233938	0.385838	0.60631	0.544309	0.741726
RP5-943J3.2	0.275268	0.808278	0.630896	1.28116	0.200138	NA
LRRC8D	1.65281	0.503199	0.421376	1.19418	0.232407	NA
ZNF326	9.69703	0.483364	0.213637	2.26254	0.0236639	0.122175
ZNF644	19.8038	0.813888	0.207042	3.93104	8.45806e-05	0.00287769
CDC7	0.413246	0.547217	0.488756	1.11961	0.262879	NA
TGFBR3	1.8062	-0.00647288	0.458296	-0.0141238	0.988731	NA
BRDT	0.0269608	0	1.91031	0	1	NA
EPHX4	0.0178321	0	2.68233	0	1	NA
BTBD8	0.241886	0.701269	0.612699	1.14456	0.252392	NA
GLMN	2.93774	0.737277	0.371586	1.98414	0.0472404	0.184395
RPAP2	7.31162	0.73433	0.338685	2.16818	0.0301449	0.143034
GFI1	0.57212	0.318828	0.525951	0.606193	0.544387	NA
EVI5	2.15552	0.381872	0.310648	1.22928	0.218967	0.446708
RPL5	656.036	-0.186205	0.0433476	-4.29562	1.74206e-05	0.000876657
FAM69A	2.15144	0.168636	0.391821	0.430391	0.666911	0.820991
MTF2	11.7452	0.335021	0.18615	1.79974	0.0719018	0.238771
TMED5	9.61343	0.0824986	0.21508	0.383571	0.701296	0.839849
CCDC18	2.97354	0.211621	0.345282	0.612892	0.539948	0.738639
DR1	10.7818	-0.15397	0.21208	-0.725998	0.46784	0.685619
FNBP1L	0.565993	0.34328	0.529249	0.648617	0.516586	NA
BCAR3	0.756127	-0.457159	0.598969	-0.763243	0.445318	NA
RP4-561L24.3	0.114136	0.804493	0.649165	1.23927	0.215244	NA
DNTTIP2	19.9961	0.290465	0.176216	1.64835	0.0992816	0.286357
GCLM	3.46129	-0.325909	0.353909	-0.920885	0.35711	0.591286
ARHGAP29	0.0054125	0	5.23195	0	1	NA
ABCD3	2.04963	0.146684	0.37501	0.391148	0.695688	0.836668
F3	0.173304	-0.0142176	0.82468	-0.0172401	0.986245	NA
CNN3	0.720969	0.163031	0.45488	0.358405	0.72004	NA
ALG14	1.73292	0.430929	0.379545	1.13538	0.256215	NA
TMEM56	0.313382	0.325851	0.858037	0.379763	0.704121	NA
RWDD3	0.455207	0.712511	0.448366	1.58913	0.112032	NA
PTBP2	2.75617	0.536673	0.331187	1.62045	0.105135	0.29502
DPYD	3.66104	0.618962	0.399822	1.54809	0.1216	0.321205
SNX7	0.0380104	0	1.34464	0	1	NA
FRRS1	0.112421	1.03312	1.87085	0.552221	0.580797	NA
AGL	4.44794	0.207395	0.322838	0.642413	0.520605	0.725578
SLC35A3	3.50517	0.199783	0.311208	0.641961	0.520898	0.725758
HIAT1	9.5219	0.409293	0.242179	1.69004	0.0910198	0.272175
SASS6	1.81499	0.899396	0.377222	2.38426	0.0171134	NA
TRMT13	5.50729	0.303236	0.311424	0.973709	0.330201	0.564197
DBT	2.09279	0.636035	0.414835	1.53322	0.125221	0.325572
RP11-305E17.6	0.024133	0	1.55999	0	1	NA
RTCA	5.49602	0.122079	0.236636	0.515893	0.605929	0.782231
CDC14A	7.46752	0.665371	0.378835	1.75636	0.0790271	0.251382
EXTL2	0.78499	0.720299	0.427998	1.68295	0.0923851	NA
RP4-549L20.3	0.246345	0.632777	0.493374	1.28255	0.19965	NA
SLC30A7	9.3163	0.115808	0.268067	0.432011	0.665733	0.820201
DPH5	5.72805	0.1521	0.229551	0.662597	0.507589	0.715183
AC093157.1	0.443892	0.217083	0.495485	0.438123	0.661297	NA
RP11-421L21.2	0.2619	0.597998	0.542729	1.10184	0.270533	NA
RP11-421L21.3	1.925	0.783217	0.366854	2.13496	0.0327644	0.149834
RP4-575N6.4	1.30907	0.267226	0.448129	0.596314	0.550965	NA
S1PR1	7.07175	-0.652087	0.310182	-2.10227	0.0355295	0.15783
RNPC3	6.40269	0.743687	0.304027	2.44612	0.0144401	0.0920797
AMY2B	0.495798	0.585511	0.490684	1.19325	0.23277	NA
PRMT6	0.968932	0.917202	0.444171	2.06497	0.0389254	NA
VAV3	4.45439	0.620633	0.338085	1.83573	0.0663973	0.228111
RP11-356N1.2	0.079641	1.19229	5.06505	0.235396	0.813901	NA
SLC25A24	3.47786	0.665868	0.327632	2.03237	0.0421164	0.173616
FAM102B	1.75963	0.0918515	0.407482	0.225412	0.821659	NA
HENMT1	1.64941	0.161256	0.417211	0.38651	0.699119	NA
PRPF38B	42.67	0.629699	0.156309	4.02855	5.61207e-05	0.00218686
STXBP3	6.82557	0.0929136	0.258661	0.359209	0.719438	0.85013
GPSM2	1.24932	0.176432	0.43419	0.406349	0.684486	NA
CLCC1	2.17873	0.169196	0.385528	0.438867	0.660758	0.816875
WDR47	2.6417	0.672757	0.379834	1.77119	0.0765297	0.246949
TAF13	3.01484	0.271152	0.309131	0.877144	0.380409	0.610423
RP5-1065J22.8	0.711396	0.803644	0.435628	1.84479	0.0650678	NA
TMEM167B	7.53591	0.71116	0.210453	3.37919	0.000727	0.0132563
SCARNA2	0.28675	0.754322	0.554819	1.35958	0.173962	NA
C1orf194	0.00881425	0	3.82774	0	1	NA
KIAA1324	0.984022	0.33338	0.489633	0.680876	0.49595	NA
SARS	11.6005	-0.0912111	0.21016	-0.434007	0.664283	0.819449
CELSR2	0.0734747	0.795192	0.723367	1.09929	0.27164	NA
PSRC1	0.0981982	0.962366	1.61391	0.596294	0.550979	NA
SORT1	0.108893	0.969397	0.811877	1.19402	0.23247	NA
PSMA5	12.9876	-0.607024	0.180915	-3.35529	0.000792808	0.0140704
ATXN7L2	0.572913	0.19289	0.490051	0.393611	0.693868	NA
CYB561D1	1.12344	0.179861	0.45853	0.392255	0.69487	NA
AMIGO1	0.253721	0.48527	0.53363	0.909375	0.363152	NA
GNAI3	10.5099	0.0482626	0.194321	0.248365	0.803852	0.902373
AMPD2	2.03431	0.575672	0.413337	1.39274	0.163698	0.378628
GSTM4	0.804331	0.30952	0.46512	0.665464	0.505754	NA
GSTM2	0.561192	0.379178	0.487722	0.777447	0.436895	NA
GSTM3	1.34718	0.507536	0.507993	0.999102	0.317745	NA
CSF1	0.294146	0.121204	0.591073	0.205058	0.837527	NA
AHCYL1	4.39724	0.217393	0.293855	0.739795	0.459424	0.679473
STRIP1	2.95218	0.416843	0.320361	1.30117	0.193201	0.414653
RP4-773N10.4	0.106935	0.907099	0.768662	1.1801	0.23796	NA
RBM15	3.19563	0.591275	0.327927	1.80307	0.0713769	0.23802
SLC16A4	0.952105	0.796218	0.462074	1.72314	0.0848638	NA
RP5-1074L1.4	0.563395	0.866447	0.66046	1.31188	0.189559	NA
LAMTOR5-AS1	0.359553	0.745729	0.567326	1.31446	0.18869	NA
LAMTOR5	28.4424	-0.214077	0.11556	-1.85252	0.0639511	0.223134
RP11-284N8.3	3.06894	-0.251005	0.37248	-0.673874	0.500391	0.709913
KCNA3	5.21996	0.586081	0.349103	1.67882	0.0931871	0.275752
CD53	34.6659	0.47243	0.152748	3.09287	0.0019823	0.0258758
RP11-96K19.2	0.373126	0.535371	0.506414	1.05718	0.29043	NA
LRIF1	4.663	-0.12334	0.279392	-0.441459	0.658881	0.816057
DRAM2	15.667	0.382677	0.136868	2.79596	0.00517452	0.0489532
CEPT1	4.45202	0.413772	0.323551	1.27885	0.200951	0.424255
RP5-1180E21.5	1.14723	0.825105	0.489246	1.68648	0.0917027	NA
DENND2D	4.98664	-0.160063	0.385334	-0.415387	0.677859	0.826938
CHI3L2	1.60937	0.670873	0.402902	1.6651	0.0958924	NA
PIFO	0.119245	0.754922	0.811285	0.930527	0.352098	NA
OVGP1	0.591943	0.808457	0.607173	1.33151	0.183021	NA
WDR77	2.69431	0.152223	0.379843	0.400753	0.688602	0.833161
ATP5F1	18.7382	-0.13994	0.144606	-0.96774	0.333174	0.567696
C1orf162	13.0293	0.488595	0.226613	2.15608	0.0310775	0.145767
ADORA3	0.0364163	0	3.60311	0	1	NA
RAP1A	21.3386	-0.0627927	0.155577	-0.403612	0.686498	0.831979
FAM212B	0.580309	0.313573	0.480807	0.65218	0.514285	NA
DDX20	3.41109	0.686401	0.319786	2.14644	0.0318381	0.147281
CTTNBP2NL	0.298139	0.750516	0.809999	0.926564	0.354153	NA
WNT2B	0.361805	1.04187	0.526687	1.97817	0.0479099	NA
ST7L	1.64029	0.320515	0.396063	0.809252	0.41837	NA
CAPZA1	29.8042	-0.263196	0.165978	-1.58573	0.1128	0.308218
MOV10	1.11039	0.395893	0.438904	0.902004	0.367055	NA
RHOC	3.18026	0.0957287	0.304847	0.314022	0.753504	0.872647
PPM1J	0.137582	1.3051	1.44467	0.903386	0.366321	NA
SLC16A1	3.8145	0.440972	0.326444	1.35083	0.176749	0.395315
SLC16A1-AS1	1.30192	0.136093	0.432227	0.314866	0.752864	NA
RP11-31F15.2	0.118124	0.633657	0.831955	0.761648	0.44627	NA
LRIG2	2.13707	0.556639	0.404591	1.37581	0.168882	0.384799
MAGI3	0.606137	0.611405	0.481404	1.27005	0.204068	NA
PHTF1	2.72544	0.318479	0.325487	0.978471	0.327841	0.562151
RSBN1	14.4789	0.738882	0.192005	3.84823	0.000118972	0.00373774
PTPN22	9.89896	0.350672	0.226203	1.55026	0.12108	0.320291
AP4B1-AS1	0.217614	0.611694	0.546161	1.11999	0.262719	NA
BCL2L15	0.0966861	0	0.667221	0	1	NA
AP4B1	2.00945	0.609659	0.387967	1.57142	0.116085	0.313481
DCLRE1B	0.358834	0.490503	0.4924	0.996146	0.319179	NA
RP5-1073O3.7	2.2252	1.22045	0.472617	2.58233	0.00981349	0.0737064
HIPK1	10.2057	0.424968	0.288252	1.47429	0.140402	0.346802
TRIM33	10.4062	0.656633	0.239246	2.7446	0.00605847	0.0544157
BCAS2	25.1579	-0.000311882	0.207955	-0.00149976	0.998803	0.99948
DENND2C	0.602099	0.641081	0.481544	1.3313	0.183089	NA
NRAS	5.30252	0.172236	0.238759	0.721382	0.470675	0.687932
CSDE1	46.1723	0.00788883	0.131343	0.0600629	0.952106	0.978873
SIKE1	6.85845	0.412738	0.244919	1.6852	0.0919502	0.273548
TSPAN2	1.35049	0.373292	0.468854	0.79618	0.425928	NA
RP4-666F24.3	0.105978	0.672814	0.62571	1.07528	0.282248	NA
VANGL1	0.233586	0.853565	0.675379	1.26383	0.20629	NA
SLC22A15	0.152237	0.823435	0.901164	0.913746	0.36085	NA
ATP1A1	23.3761	-0.143096	0.17898	-0.799507	0.423996	0.650128
RP5-1086K13.1	0.0792729	0.825601	2.35964	0.349885	0.726425	NA
CD58	4.1014	-1.43268	0.324791	-4.41109	1.02852e-05	0.00058573
CD2	31.1436	-0.695147	0.301017	-2.30933	0.0209253	0.113848
CD101	0.133147	0.622915	0.790877	0.787626	0.430916	NA
TTF2	2.48595	0.17277	0.369112	0.468068	0.639736	0.802876
RP11-188D8.1	0.199978	0.75274	0.651271	1.1558	0.247762	NA
MAN1A2	11.6499	0.363373	0.242982	1.49547	0.134791	0.338605
FAM46C	24.4194	-0.230023	0.203569	-1.12995	0.258497	0.489876
GDAP2	2.38802	0.440493	0.352165	1.25082	0.211002	0.437468
WDR3	1.83876	0.355716	0.409533	0.868589	0.385072	NA
SPAG17	0.00391008	1.00853	5.77142	0.174745	0.86128	NA
WARS2	1.91732	0.0990931	0.360758	0.27468	0.783562	NA
RP11-418J17.1	0.724246	1.07529	0.464877	2.31307	0.0207189	NA
ZNF697	0.0891209	0.540306	1.25423	0.430787	0.666623	NA
PHGDH	0.961025	-0.268858	0.470532	-0.571391	0.567734	NA
REG4	0.221159	0.676759	0.592342	1.14251	0.25324	NA
NOTCH2	4.1302	0.264132	0.28596	0.923667	0.35566	0.590167
RP11-439A17.7	1.64865	0.283932	0.418602	0.678286	0.49759	NA
FAM72B	0.0681909	0.8119	1.42423	0.570061	0.568636	NA
FCGR1B	0.0480192	1.09293	1.50347	0.726938	0.467264	NA
RP11-343N15.5	2.92723	-0.215409	0.347229	-0.620367	0.535016	0.735299
RP11-344P13.6	0.441421	0.561501	0.463271	1.21204	0.225498	NA
RP11-417J8.3	0.0328249	1.00943	1.87961	0.537042	0.591239	NA
RP11-423O2.5	0.352408	0.881406	0.615743	1.43145	0.152301	NA
RP11-782C8.1	0.369788	0.987255	0.537681	1.83614	0.0663375	NA
RP11-782C8.5	0.149112	0.79444	0.783469	1.014	0.310581	NA
RP11-435B5.4	0.104474	0.950912	0.898541	1.05828	0.289926	NA
RP6-206I17.1	0.215955	0.487421	0.541348	0.900383	0.367916	NA
RP6-206I17.2	0.258738	0.922268	0.579301	1.59204	0.111376	NA
FAM72D	0.0121647	1.06641	5.77129	0.184779	0.853403	NA
LINC00623	0.450013	0.935736	0.491836	1.90254	0.0571008	NA
AL592284.1	9.23583	0.886577	0.211124	4.19932	2.67714e-05	0.00125894
RP11-640M9.1	19.5395	-0.0445359	0.202456	-0.219978	0.825888	0.916233
NBPF9	3.66805	0.297073	0.367358	0.808676	0.418702	0.645994
PDE4DIP	4.5545	0.162194	0.35133	0.461658	0.644327	0.805463
AL590452.1	1.57382	-0.193893	0.392281	-0.494271	0.621115	NA
RP11-326G21.1	0.359087	0.786268	0.514418	1.52846	0.126398	NA
NOTCH2NL	13.3627	0.958012	0.204054	4.69489	2.66753e-06	0.000203035
NBPF10	14.9262	0.972907	0.252347	3.85543	0.000115526	0.003645
TXNIP	189.395	1.58852	0.257425	6.17082	6.79387e-10	2.08996e-07
POLR3GL	14.1162	0.40705	0.193027	2.10877	0.0349643	0.156071
ANKRD34A	0.15075	1.1603	0.95767	1.21159	0.22567	NA
RP11-315I20.1	0.168338	0.859009	0.680945	1.2615	0.20713	NA
LIX1L	3.62435	-0.510331	0.305441	-1.6708	0.0947609	0.2784
RBM8A	40.68	0.0323429	0.119733	0.270125	0.787064	0.895499
PEX11B	1.20769	-0.0569287	0.415556	-0.136994	0.891035	NA
ITGA10	0.160691	0.843278	0.597182	1.4121	0.157922	NA
ANKRD35	0.065923	0	0.775486	0	1	NA
PIAS3	0.792761	0.895385	0.442646	2.0228	0.0430938	NA
NUDT17	0.441927	1.16939	0.531989	2.19815	0.0279386	NA
POLR3C	1.6061	0.36095	0.395381	0.912918	0.361286	NA
RNF115	7.52302	-0.388055	0.222836	-1.74144	0.0816059	0.255827
CD160	0.281775	0.66607	0.616839	1.07981	0.280226	NA
GPR89A	2.76587	0.297637	0.358816	0.829496	0.406824	0.634336
GPR89C	0.108175	0.875078	1.08956	0.803148	0.421889	NA
NBPF11	0.312863	0.693165	0.516918	1.34096	0.179934	NA
NBPF12	4.1967	0.931357	0.332376	2.80211	0.00507688	0.0484271
PRKAB2	2.08074	0.482592	0.410378	1.17597	0.239607	0.469983
RP11-337C18.8	1.14738	0.532003	0.492786	1.07958	0.280328	NA
FMO5	0.563867	0.968886	0.539296	1.79658	0.0724031	NA
RP11-337C18.9	0.149947	0	1.11526	0	1	NA
CHD1L	2.35666	0.180006	0.352498	0.510659	0.60959	0.784468
BCL9	0.487863	0.670424	0.502249	1.33484	0.181927	NA
ACP6	0.625854	0.559792	0.470205	1.19053	0.233839	NA
GPR89B	0.243225	0.610686	0.57963	1.05358	0.292076	NA
LINC01138	0.051827	0.795732	1.18862	0.669457	0.503204	NA
NBPF14	1.84731	0.772158	0.475692	1.62323	0.10454	NA
RP11-89F3.2	0.0739997	0.908542	0.730976	1.24292	0.213898	NA
NBPF20	0.646572	0.546231	0.484439	1.12755	0.259509	NA
NBPF15	18.7279	1.27734	0.242492	5.26754	1.38261e-07	1.73124e-05
RP11-666A1.5	0.186989	0.842485	0.604271	1.39422	0.163252	NA
NBPF16	0.942032	1.23767	0.476994	2.59473	0.00946661	NA
RP11-763B22.4	0.435915	0.903609	0.5158	1.75186	0.0797979	NA
RP11-14N7.2	0.614916	0.213607	0.495712	0.430908	0.666535	NA
RP11-403I13.4	0.275694	0.585735	0.537685	1.08936	0.275994	NA
RP11-403I13.8	1.58054	0.7158	0.431496	1.65888	0.0971398	NA
FAM72C	0.0147116	0	5.77148	0	1	NA
RP11-277L2.4	2.81336	1.16997	0.411039	2.84638	0.00442189	0.0439392
RP11-277L2.3	1.66473	1.24209	0.385538	3.2217	0.00127431	NA
RP11-277L2.5	0.0733448	0.683015	1.32382	0.515943	0.605894	NA
RP11-353N4.1	0.0309793	0	1.31335	0	1	NA
FCGR1A	0.184824	1.0174	0.762117	1.33496	0.18189	NA
HIST2H2AA3	4.05188	0.618995	0.323471	1.9136	0.0556713	0.204285
RP11-196G18.24	0.174287	0.790975	0.665291	1.18892	0.234473	NA
HIST2H2BE	1.42721	0.133668	0.430149	0.310747	0.755993	NA
HIST2H2AC	14.3417	0.915567	0.307753	2.97501	0.00292979	0.0329735
BOLA1	1.27339	0.44006	0.429102	1.02554	0.30511	NA
SV2A	0.210541	0	0.513529	0	1	NA
SF3B4	4.34278	-0.738697	0.238975	-3.09111	0.00199412	0.0259108
MTMR11	0.257864	0.745117	0.636752	1.17018	0.241927	NA
OTUD7B	0.770557	0.480317	0.485506	0.989314	0.32251	NA
VPS45	1.59995	0.940734	0.438376	2.14595	0.0318768	NA
PLEKHO1	11.3285	-0.186557	0.196051	-0.951577	0.341312	0.576241
ANP32E	15.4904	0.0661139	0.179583	0.368152	0.71276	0.847393
APH1A	14.3576	-0.218909	0.146136	-1.49798	0.134139	0.338078
C1orf54	0.530117	0.606619	0.459073	1.3214	0.186369	NA
C1orf51	0.0538927	0.976592	0.93721	1.04202	0.297402	NA
MRPS21	27.5341	-0.202953	0.131451	-1.54394	0.122603	0.322586
PRPF3	4.22251	0.0229376	0.302859	0.0757371	0.939628	0.973243
RPRD2	5.81071	0.614753	0.29191	2.10597	0.0352069	0.15668
TARS2	1.88446	0.595865	0.408756	1.45775	0.144909	NA
LINC00568	0.317446	0.893316	0.543185	1.64459	0.100055	NA
RP11-54A4.2	0.00862518	0	5.45073	0	1	NA
ADAMTSL4	0.065138	0.891407	0.930659	0.957824	0.338152	NA
ADAMTSL4-AS1	0.123208	0.700151	0.707486	0.989633	0.322354	NA
MCL1	88.0327	-0.298056	0.150062	-1.98622	0.0470086	0.183894
ENSA	26.2272	-0.335407	0.129664	-2.58674	0.00968889	0.0732921
GOLPH3L	1.35305	0.0783154	0.407104	0.192372	0.847451	NA
CTSS	36.2417	0.245893	0.136006	1.80796	0.0706134	0.236232
CTSK	0.226935	0.862103	0.597843	1.44202	0.149296	NA
ARNT	1.94776	0.350562	0.38799	0.903532	0.366244	0.599992
SETDB1	2.48032	0.28025	0.362514	0.773074	0.439479	0.661773
CERS2	4.82046	0.161909	0.262301	0.617265	0.53706	0.737111
FAM63A	0.563785	0.532106	0.49283	1.0797	0.280278	NA
PRUNE	0.987743	0.25775	0.429833	0.59965	0.548739	NA
BNIPL	0.0882881	0.916472	0.749114	1.22341	0.221176	NA
C1orf56	30.2865	0.535394	0.223375	2.39684	0.0165371	0.098929
CDC42SE1	34.6635	0.508468	0.174401	2.91552	0.00355102	0.0378861
MLLT11	1.26144	0.536183	0.428296	1.2519	0.210607	NA
GABPB2	3.93235	0.270163	0.368634	0.732876	0.463634	0.682827
TNFAIP8L2	0.450376	0.366678	0.52582	0.697345	0.485587	NA
SCNM1	7.36098	0.546304	0.235119	2.32352	0.0201512	0.111945
LYSMD1	0.0939312	0.997443	1.09094	0.914301	0.360559	NA
TMOD4	0.0209817	0.874923	3.31926	0.26359	0.792096	NA
VPS72	2.56263	0.440814	0.355297	1.24069	0.214721	0.442076
PIP5K1A	2.96363	0.463151	0.341286	1.35708	0.174757	0.392883
PSMD4	14.488	-0.220304	0.17214	-1.2798	0.200615	0.423789
RP11-126K1.2	0.36862	0.666577	0.56086	1.18849	0.23464	NA
ZNF687	0.841485	0.364681	0.407059	0.895891	0.370311	NA
PI4KB	4.8665	0.0766163	0.294151	0.260466	0.794505	0.898253
RFX5	4.06641	-0.218263	0.248075	-0.879829	0.378952	0.60941
RP11-126K1.6	0.721416	0.158055	0.406049	0.389252	0.69709	NA
SELENBP1	0.00572957	0.893625	5.77146	0.154835	0.876951	NA
PSMB4	14.146	-0.289303	0.153467	-1.88511	0.0594146	0.212631
POGZ	8.69109	0.15534	0.22333	0.695565	0.486701	0.698751
TUFT1	0.487851	0.816108	0.485397	1.68132	0.092701	NA
SNX27	3.25838	1.03519	0.349094	2.96537	0.00302317	0.0337597
MRPL9	9.47219	-0.224113	0.174901	-1.28137	0.200063	0.422873
OAZ3	0.124637	1.03511	1.35224	0.765481	0.443985	NA
TDRKH	0.295881	0.222722	0.581423	0.383064	0.701673	NA
RP11-98D18.9	0.355438	0.581604	0.504874	1.15198	0.24933	NA
RORC	0.108414	0	0.793907	0	1	NA
C2CD4D	0.111448	0	0.639229	0	1	NA
THEM4	7.84938	0.17805	0.30005	0.593401	0.552913	0.74669
S100A10	82.9175	-0.602882	0.148417	-4.06207	4.86392e-05	0.00197309
S100A11	41.8975	-1.32952	0.209923	-6.33337	2.3987e-10	8.06459e-08
TCHH	0.0298452	0.81642	1.98189	0.411939	0.680384	NA
S100A9	39.9727	0.684581	0.263912	2.59398	0.00948731	0.0724352
S100A12	4.8868	0.914102	0.408017	2.24035	0.025068	0.127026
S100A8	30.5898	1.597	0.281545	5.67226	1.40923e-08	2.60109e-06
S100A6	135.038	0.0710342	0.130085	0.54606	0.585024	0.768971
S100A5	0.131166	0.678034	0.601248	1.12771	0.259442	NA
S100A4	155.316	0.0856658	0.148606	0.576462	0.564303	0.754618
S100A3	0.00115026	0	5.77148	0	1	NA
S100A2	0.131299	0	1.14127	0	1	NA
S100A16	0.00152403	0	5.77147	0	1	NA
S100A14	0.00570284	0	5.77148	0	1	NA
S100A13	0.893805	0.440177	0.429969	1.02374	0.305957	NA
RP1-178F15.4	0.139676	1.12628	0.898862	1.25301	0.210202	NA
CHTOP	9.06269	0.148207	0.242809	0.610386	0.541606	0.739948
SNAPIN	4.03815	-0.361555	0.295778	-1.22238	0.221562	0.449518
ILF2	14.1283	-0.0948767	0.150957	-0.6285	0.529676	0.731724
INTS3	2.21999	0.656055	0.409899	1.60053	0.109481	0.302733
SLC27A3	0.708645	0.528617	0.451001	1.1721	0.241157	NA
GATAD2B	6.17487	0.62132	0.286792	2.16645	0.030277	0.143476
DENND4B	4.16479	0.751065	0.315817	2.37816	0.0173991	0.102602
CRTC2	3.21462	0.500763	0.334621	1.49651	0.134521	0.338131
SLC39A1	2.896	-0.157608	0.291159	-0.541311	0.588293	0.771058
CREB3L4	0.369254	0.547787	0.488275	1.12188	0.261913	NA
JTB	38.7774	-0.272156	0.115374	-2.35889	0.0183296	0.105373
RP11-422P24.11	0.0771407	1.06075	0.94717	1.11992	0.26275	NA
RAB13	0.669196	0.898278	0.539338	1.66552	0.0958095	NA
RPS27	3574.15	0.320276	0.0698519	4.58508	4.53823e-06	0.00029391
TPM3	59.5075	0.0695445	0.131402	0.529249	0.596633	0.777022
C1orf43	15.0363	-0.296563	0.153147	-1.93645	0.052812	0.197224
UBAP2L	5.00296	0.19596	0.272326	0.719579	0.471784	0.688807
HAX1	19.0569	-0.488637	0.138778	-3.52099	0.000429934	0.00922734
ATP8B2	4.35248	-0.169847	0.425628	-0.399052	0.689855	0.833612
IL6R	5.88444	-0.68105	0.372095	-1.83031	0.0672036	0.229599
UBE2Q1	5.14814	-0.481072	0.28219	-1.70478	0.0882355	0.267204
ADAR	25.9319	-0.320164	0.180633	-1.77246	0.0763187	0.246929
PMVK	8.49256	-0.561796	0.213672	-2.62924	0.00855748	0.0681552
RP11-307C12.13	0.428745	0.751654	0.529495	1.41957	0.155734	NA
PBXIP1	19.3085	-0.110348	0.206299	-0.534891	0.592725	0.774392
PYGO2	2.20387	0.302758	0.362755	0.834607	0.403939	0.631706
RP11-307C12.12	0.739271	0.818703	0.42982	1.90476	0.0568116	NA
SHC1	2.41543	-0.200041	0.351193	-0.569604	0.568946	0.757671
CKS1B	3.88937	-0.301455	0.238495	-1.26399	0.206234	0.431065
FLAD1	3.10855	0.794842	0.345417	2.30111	0.0213855	0.115839
ZBTB7B	1.95593	0.786746	0.413602	1.90218	0.0571476	0.207434
ADAM15	0.841209	0.256465	0.436133	0.588043	0.556503	NA
EFNA4	1.4901	0.310063	0.389515	0.796025	0.426018	NA
EFNA3	0.261299	1.21042	0.59885	2.02124	0.0432553	NA
EFNA1	0.101461	0.691714	0.743012	0.930959	0.351875	NA
SLC50A1	5.70812	0.140221	0.228327	0.614122	0.539135	0.738347
DPM3	7.56278	-0.169815	0.228965	-0.741664	0.458291	0.678749
KRTCAP2	24.7658	-0.0263423	0.154078	-0.170967	0.86425	0.937363
TRIM46	0.27053	0.416327	0.571845	0.728042	0.466588	NA
MUC1	0.168831	0	0.555945	0	1	NA
THBS3	0.649971	0.88045	0.505615	1.74134	0.0816232	NA
RP11-263K19.4	0.106621	0	0.606897	0	1	NA
MTX1	3.74745	-0.859524	0.263597	-3.26076	0.00111115	0.0174311
GBA	0.972523	-0.143377	0.442458	-0.324047	0.745902	NA
FAM189B	0.830519	-0.199425	0.421465	-0.473171	0.636091	NA
SCAMP3	3.4974	-0.182566	0.297369	-0.613939	0.539255	0.738376
CLK2	1.54048	0.889899	0.436496	2.03873	0.0414769	NA
HCN3	0.050674	0.995252	1.47513	0.67469	0.499873	NA
FDPS	9.74314	-0.0314041	0.195061	-0.160997	0.872096	0.941256
RUSC1-AS1	0.0280929	0	1.83035	0	1	NA
RUSC1	1.01345	0.593852	0.440432	1.34834	0.177549	NA
ASH1L	30.2435	0.747631	0.208466	3.58634	0.00033535	0.00764164
MSTO1	1.698	-0.198561	0.421717	-0.470839	0.637756	NA
YY1AP1	3.89883	0.180323	0.28412	0.634673	0.525642	0.729131
DAP3	12.3457	-0.410604	0.165555	-2.48016	0.0131323	0.0867841
GON4L	11.0964	0.110676	0.227465	0.486564	0.626567	0.795463
SYT11	1.70195	0.472919	0.432628	1.09313	0.274336	NA
RIT1	4.87692	0.283128	0.256646	1.10319	0.269947	0.502146
KIAA0907	8.976	0.650481	0.238256	2.73017	0.00633014	0.0557702
ARHGEF2	5.99402	0.361813	0.254198	1.42335	0.154635	0.365568
RP11-336K24.12	0.183611	1.06563	0.757559	1.40666	0.159529	NA
SSR2	69.7359	-0.333154	0.0966245	-3.44792	0.000564914	0.0112723
UBQLN4	0.977644	0.588966	0.434528	1.35541	0.175286	NA
LAMTOR2	11.2463	-0.0237194	0.199912	-0.118649	0.905553	0.955597
RAB25	0.11891	0.878497	0.644836	1.36236	0.173085	NA
MEX3A	0.106445	0.870442	1.15455	0.753921	0.450897	NA
LMNA	71.0852	-0.606474	0.245641	-2.46894	0.0135513	0.0883045
SEMA4A	3.62085	-0.268915	0.381547	-0.704803	0.480933	0.695948
SLC25A44	1.68515	-0.71143	0.376804	-1.88807	0.0590172	NA
PMF1	9.45537	-0.138648	0.178039	-0.778747	0.436128	0.659834
BGLAP	0.0968481	0.944753	0.765293	1.2345	0.217017	NA
PAQR6	0.548364	0.206291	0.557961	0.369722	0.71159	NA
SMG5	2.34169	0.533475	0.34546	1.54425	0.122529	0.322579
TMEM79	0.575037	0.728606	0.493404	1.47669	0.139758	NA
C1orf85	1.15892	0.0366968	0.415517	0.0883161	0.929625	NA
CCT3	19.1999	-0.351147	0.148586	-2.36326	0.0181151	0.104651
C1orf61	0.211248	0.584737	0.584741	0.999993	0.317314	NA
RP11-98G7.1	0.191949	1.0975	0.6136	1.78862	0.0736758	NA
MEF2D	5.05711	0.0399844	0.263358	0.151825	0.879325	0.943807
TTC24	0.149497	1.23307	0.901863	1.36724	0.171549	NA
APOA1BP	6.0039	0.0811455	0.219219	0.370158	0.711265	0.846569
GPATCH4	7.38629	-0.239128	0.234786	-1.01849	0.308443	0.543034
ISG20L2	10.4465	0.20923	0.209299	0.999673	0.317469	0.551265
RRNAD1	1.6076	0.719512	0.376062	1.91328	0.0557123	NA
MRPL24	3.22217	-0.277284	0.299194	-0.92677	0.354046	0.588929
HDGF	5.67027	-0.480826	0.245895	-1.95541	0.050535	0.192863
PRCC	4.23536	0.123389	0.263992	0.467397	0.640216	0.803043
SH2D2A	3.09516	-0.441444	0.39559	-1.11591	0.26446	0.496122
PEAR1	0.0108371	0	3.76173	0	1	NA
ARHGEF11	0.179622	0.686046	0.610539	1.12367	0.261152	NA
ETV3	8.11122	0.476051	0.297036	1.60267	0.109007	0.302137
FCRL5	11.9436	1.0261	0.346325	2.96283	0.00304823	0.0338932
FCRL3	4.31407	0.93702	0.402074	2.33047	0.0197814	0.111059
FCRL2	8.60805	0.858454	0.358177	2.39673	0.0165419	0.098929
FCRL1	8.93267	0.986639	0.274042	3.60032	0.000317828	0.00730964
CD1D	0.766611	0.731161	0.524988	1.39272	0.163705	NA
CD1A	0.0772016	1.21646	3.87005	0.314327	0.753273	NA
CD1C	2.62223	-0.713832	0.419882	-1.70008	0.0891162	0.268439
CD1E	0.00269983	0	5.77149	0	1	NA
MNDA	3.36556	0.783657	0.336863	2.32633	0.0200007	0.11153
PYHIN1	7.73321	1.20418	0.373263	3.2261	0.00125491	0.0188181
IFI16	31.1788	0.131823	0.210183	0.627181	0.53054	0.731724
AIM2	6.93449	0.872979	0.339392	2.57219	0.0101057	0.0754405
FCER1A	0.150427	0.939338	0.69768	1.34637	0.178182	NA
DUSP23	3.63146	0.0681303	0.296424	0.229841	0.818215	0.911962
FCRL6	0.21962	0.612489	0.718394	0.85258	0.393892	NA
SLAMF8	0.0412471	0.927592	2.00208	0.463313	0.64314	NA
VSIG8	0.109636	0.996989	0.769023	1.29644	0.194825	NA
CCDC19	0.284279	0.369502	0.55033	0.671419	0.501954	NA
TAGLN2	72.7028	-0.569216	0.105733	-5.38351	7.30456e-08	9.80537e-06
SLAMF9	0.00934768	0.891766	4.87887	0.182781	0.85497	NA
PIGM	1.03701	-0.484539	0.461103	-1.05082	0.293339	NA
IGSF8	2.33593	-0.18121	0.327755	-0.552882	0.580344	0.765395
PEA15	4.55481	-0.590674	0.257338	-2.29533	0.0217145	0.116949
DCAF8	4.70576	0.357352	0.280611	1.27348	0.202848	0.426701
RP11-574F21.2	0.18497	0.47142	0.538899	0.874783	0.381692	NA
PEX19	1.75311	0.768037	0.377968	2.03201	0.0421522	NA
COPA	11.7266	0.16515	0.205974	0.8018	0.422669	0.649289
NCSTN	2.82202	0.284894	0.303794	0.937788	0.348353	0.583751
SLAMF6	3.32454	1.05103	0.386553	2.71899	0.00654808	0.0570639
CD84	8.33616	0.0966923	0.34128	0.283322	0.77693	0.888349
SLAMF1	3.43788	-0.42135	0.344169	-1.22425	0.220857	0.448702
CD48	83.2125	-0.167934	0.0939389	-1.78769	0.0738255	0.242253
SLAMF7	4.79717	-0.278295	0.404817	-0.687459	0.491793	0.70244
LY9	15.4643	0.169414	0.210327	0.805481	0.420542	0.647521
CD244	0.144968	0.589492	0.602069	0.97911	0.327526	NA
F11R	1.00645	0.907217	0.434563	2.08765	0.0368293	NA
TSTD1	36.7072	0.373087	0.136252	2.73822	0.00617734	0.0550574
USF1	1.84276	0.373072	0.38629	0.965781	0.334154	NA
ARHGAP30	19.7172	0.40216	0.219943	1.82847	0.0674786	0.230427
PVRL4	0.000849032	0	5.77148	0	1	NA
PFDN2	18.8717	0.025501	0.143573	0.177617	0.859024	0.93501
NIT1	1.7979	0.361819	0.374657	0.965735	0.334177	NA
DEDD	1.72695	0.18201	0.367686	0.495014	0.62059	NA
UFC1	34.2278	-0.0892583	0.0991709	-0.900045	0.368096	0.600985
USP21	0.952272	0.665758	0.43964	1.51433	0.129943	NA
PPOX	2.19748	0.135049	0.382623	0.352956	0.724121	0.852391
B4GALT3	6.82414	-0.13019	0.220209	-0.591214	0.554377	0.747437
NDUFS2	8.47568	0.095864	0.209128	0.458399	0.646666	0.807293
FCER1G	5.93337	-0.251074	0.294916	-0.851342	0.39458	0.623941
TOMM40L	0.479694	0.4811	0.489791	0.982256	0.325974	NA
MPZ	0.237245	1.22354	0.602811	2.02973	0.0423839	NA
SDHC	8.58769	-0.253162	0.192889	-1.31248	0.189359	0.41057
RP11-122G18.5	0.165982	0.959862	0.754208	1.27268	0.203133	NA
FCGR2A	1.02378	0.0911866	0.447051	0.203973	0.838374	NA
HSPA6	0.74385	0.610904	0.747582	0.817173	0.41383	NA
FCGR3A	1.34497	0.237686	0.434705	0.546775	0.584533	NA
FCGR2B	5.02203	0.487456	0.254812	1.913	0.055748	0.204363
FCRLA	5.9272	0.37398	0.26977	1.38629	0.165657	0.380461
FCRLB	0.206238	0.899066	0.804221	1.11793	0.263595	NA
DUSP12	3.96682	-0.105724	0.263476	-0.401268	0.688223	0.833112
RP11-474I16.8	0.0962984	1.03145	1.08428	0.951278	0.341463	NA
ATF6	6.01976	0.12611	0.271937	0.463748	0.642828	0.804525
SH2D1B	0.164962	0.448144	0.68811	0.651267	0.514874	NA
UHMK1	13.1424	0.545917	0.210947	2.58794	0.00965526	0.0731876
UAP1	7.55576	-0.385122	0.259354	-1.48493	0.137563	0.342452
DDR2	0.141967	0.886975	0.760413	1.16644	0.243438	NA
HSD17B7	3.16927	0.474086	0.340396	1.39275	0.163696	0.378628
RGS5	0.0574943	0.816163	1.11344	0.733009	0.463553	NA
NUF2	0.295228	0.201769	0.550673	0.366403	0.714064	NA
MGST3	12.1522	-0.15549	0.198997	-0.781368	0.434586	0.658645
ALDH9A1	5.31799	0.0571369	0.247931	0.230455	0.817738	0.911839
TMCO1	15.5069	0.21088	0.182715	1.15415	0.24844	0.479915
UCK2	0.57622	0.791136	0.501244	1.57835	0.114486	NA
POGK	4.51823	0.163999	0.296608	0.552915	0.580322	0.765395
TADA1	1.05821	0.309982	0.407505	0.760683	0.446846	NA
ILDR2	0.0198066	0.89592	4.10851	0.218064	0.827379	NA
GPA33	0.354067	0.463	0.49377	0.937683	0.348407	NA
RP11-277B15.3	0.0585743	1.1268	1.13574	0.992133	0.321133	NA
POU2F1	3.93997	0.527407	0.297176	1.77473	0.0759421	0.246453
CD247	12.3717	-0.34111	0.306929	-1.11136	0.266411	0.497701
RP11-104L21.3	0.277786	0.727786	0.497816	1.46196	0.143753	NA
CREG1	1.75688	-0.0149413	0.371329	-0.0402374	0.967904	NA
RP3-455J7.4	0.324304	0.99865	1.1331	0.881345	0.378131	NA
RCSD1	23.6348	0.351096	0.189099	1.85668	0.0633572	0.222006
MPZL1	1.42145	0.182775	0.390971	0.467489	0.64015	NA
MPC2	15.9385	-0.220536	0.150985	-1.46065	0.14411	0.352291
DCAF6	3.5555	0.399707	0.318242	1.25598	0.209122	0.435037
TIPRL	6.78073	-0.102608	0.218073	-0.470521	0.637983	0.802287
SFT2D2	6.44641	0.490168	0.266259	1.84095	0.0656295	0.226564
TBX19	0.43256	0.946372	0.568583	1.66444	0.0960246	NA
XCL2	0.311989	0.353378	0.56997	0.619993	0.535262	NA
XCL1	0.248981	1.1011	0.742259	1.48344	0.137958	NA
ATP1B1	1.71013	0.635512	0.423457	1.50077	0.133414	NA
NME7	1.83637	-0.0208596	0.379847	-0.0549158	0.956206	NA
BLZF1	2.64405	0.0236019	0.356334	0.0662352	0.947191	0.976786
SLC19A2	0.545177	0.772062	0.451796	1.70887	0.0874747	NA
F5	0.946967	0.36246	0.513352	0.706065	0.480148	NA
SELP	0.11544	0.938858	0.788966	1.18999	0.234052	NA
C1orf112	0.456657	0.941285	0.476405	1.97581	0.0481765	NA
SELL	34.8944	0.657288	0.175794	3.73897	0.000184776	0.00503046
METTL18	1.38342	0.152713	0.40608	0.376066	0.706868	NA
SCYL3	1.80444	0.522231	0.433818	1.2038	0.228667	NA
KIFAP3	3.07426	-0.243906	0.325291	-0.749807	0.453371	0.67376
GORAB	1.67848	1.17251	0.3841	3.05261	0.0022686	NA
FMO2	0.00570284	0	5.77148	0	1	NA
FMO1	0.0203622	1.05514	5.77137	0.182823	0.854937	NA
FMO4	0.456559	0.808599	0.598022	1.35212	0.176336	NA
PRRC2C	81.4154	0.394146	0.143595	2.74484	0.00605403	0.0544157
VAMP4	3.29772	1.19208	0.35214	3.38524	0.00071117	0.0131593
METTL13	1.15445	0.47664	0.437712	1.08894	0.276182	NA
DNM3	0.22534	0.672733	0.607024	1.10825	0.267754	NA
PIGC	3.76847	0.393029	0.30263	1.29871	0.194043	0.415382
SUCO	6.32531	0.487469	0.267409	1.82293	0.0683136	0.23221
FASLG	0.201793	0.581753	0.720048	0.807936	0.419127	NA
TNFSF4	0.180889	0.689798	0.617558	1.11698	0.264004	NA
RP11-296O14.3	0.855448	0.821892	0.433759	1.89481	0.0581171	NA
PRDX6	18.9996	-0.0262936	0.134723	-0.195167	0.845262	0.927139
ANKRD45	0.0155624	0	5.77149	0	1	NA
KLHL20	3.23369	0.131545	0.332327	0.39583	0.69223	0.834965
CENPL	1.39445	0.512898	0.417722	1.22784	0.219505	NA
DARS2	0.284921	0.68128	0.536589	1.26965	0.204209	NA
ZBTB37	2.79117	1.01952	0.428995	2.37654	0.0174759	0.102727
RC3H1	6.19122	0.83144	0.275311	3.02001	0.00252769	0.0298974
RP11-160H22.3	0.0199229	0	1.67159	0	1	NA
RP11-160H22.5	0.16468	0.787469	0.712312	1.10551	0.268938	NA
RABGAP1L	10.162	0.542347	0.239699	2.26261	0.0236596	0.122175
CACYBP	11.6019	0.184749	0.198473	0.930848	0.351932	0.58719
MRPS14	5.63667	-0.423608	0.255198	-1.65992	0.0969308	0.282081
KIAA0040	7.81024	0.906889	0.272144	3.33238	0.00086106	0.0145807
RFWD2	4.44353	0.486113	0.292637	1.66115	0.0966834	0.281743
RASAL2	0.00450496	0	5.77148	0	1	NA
RALGPS2	35.6335	0.710043	0.21171	3.35384	0.00079698	0.0141106
FAM20B	1.63544	-0.012797	0.406475	-0.0314829	0.974884	NA
TOR3A	7.55264	0.129918	0.196032	0.662738	0.507499	0.715183
ABL2	5.15527	-0.336963	0.365427	-0.922107	0.356473	0.591026
SOAT1	2.43521	0.428796	0.369108	1.16171	0.245354	0.4772
TOR1AIP2	7.01976	0.336265	0.25073	1.34114	0.179874	0.399641
RP11-533E19.7	0.360635	0.246263	0.457151	0.538691	0.5901	NA
TOR1AIP1	6.7151	0.301896	0.266957	1.13088	0.258107	0.48962
CEP350	16.3739	0.29837	0.255345	1.1685	0.242606	0.473352
QSOX1	1.43975	0.341284	0.404731	0.843237	0.399096	NA
LHX4	0.240963	0.611615	0.66391	0.921231	0.35693	NA
RP5-1180C10.2	0.373696	0.516863	0.532015	0.97152	0.33129	NA
ACBD6	7.23526	0.207721	0.245495	0.846131	0.39748	0.62638
XPR1	2.00892	0.36234	0.403008	0.899088	0.368606	0.601418
KIAA1614	0.0395613	0	2.3301	0	1	NA
RP11-46A10.5	0.0217792	0	2.20962	0	1	NA
RP11-46A10.4	0.0276068	0.939734	1.70162	0.55226	0.580771	NA
STX6	2.17999	0.673303	0.391659	1.71911	0.0855951	0.263158
MR1	2.69625	-0.45032	0.339395	-1.32683	0.184564	0.404824
IER5	23.6414	0.395743	0.20664	1.91513	0.0554753	0.203761
RP11-309G3.3	0.302189	0.671399	0.507514	1.32292	0.185863	NA
GLUL	6.30328	0.684018	0.303121	2.25658	0.0240343	0.123226
RNASEL	1.35675	0.911798	0.457798	1.9917	0.0464036	NA
RGS16	6.53497	-0.707138	0.300198	-2.35557	0.0184943	0.106012
NPL	0.44706	0.884387	0.479986	1.84253	0.0653984	NA
DHX9	10.5413	0.19801	0.213057	0.929375	0.352695	0.587726
SMG7	3.84733	0.550707	0.360014	1.52968	0.126095	0.326964
NCF2	1.9163	0.120019	0.388276	0.309107	0.75724	NA
ARPC5	32.1649	-0.282818	0.176317	-1.60403	0.108708	0.301666
RGL1	0.229568	0.75003	0.590303	1.27058	0.203877	NA
COLGALT2	0.0328728	0	1.58059	0	1	NA
TSEN15	3.57551	-0.13556	0.322385	-0.420492	0.674126	0.824768
C1orf21	0.773632	-0.619462	0.519558	-1.19229	0.233149	NA
EDEM3	7.18909	0.518121	0.329258	1.5736	0.11558	0.31246
FAM129A	6.89866	0.282635	0.368491	0.767006	0.443078	0.665044
RNF2	2.92269	0.147116	0.307049	0.47913	0.631846	0.798957
TRMT1L	1.71012	0.276682	0.410082	0.674698	0.499868	NA
SWT1	1.16934	0.407961	0.446727	0.913223	0.361125	NA
IVNS1ABP	15.3178	-0.294676	0.215239	-1.36907	0.170978	0.388052
TPR	33.2302	0.249308	0.188985	1.3192	0.187103	0.408452
C1orf27	3.82383	0.11067	0.307815	0.359534	0.719196	0.850116
PTGS2	0.888179	-0.545143	0.480899	-1.13359	0.256966	NA
RP5-973M2.2	0.0125121	1.08136	5.1885	0.208415	0.834905	NA
PLA2G4A	0.0329446	1.12145	3.39958	0.32988	0.741491	NA
RGS18	1.70357	0.622042	0.45337	1.37204	0.170051	NA
RGS1	50.5578	0.847232	0.249292	3.39856	0.000677421	0.0126939
RGS13	0.808314	-0.626921	0.620002	-1.01116	0.31194	NA
RGS2	45.2656	0.55698	0.184236	3.0232	0.0025012	0.0297845
UCHL5	4.4037	-0.291895	0.292777	-0.996987	0.318771	0.552461
TROVE2	12.8883	0.0849907	0.189651	0.448143	0.65405	0.812117
RP11-101E13.5	0.119262	0.677481	0.716686	0.945297	0.344507	NA
GLRX2	2.27379	0.0355744	0.350934	0.101371	0.919256	0.96295
CDC73	8.25416	0.284964	0.229399	1.24222	0.214156	0.441528
B3GALT2	0.168537	0.964255	0.751252	1.28353	0.199306	NA
RP11-476B1.1	0	NA	NA	NA	NA	NA
CFH	0.594877	0.709914	0.564916	1.25667	0.208872	NA
ASPM	0.372784	0.301632	0.640784	0.470724	0.637838	NA
ZBTB41	2.12635	0.84548	0.404226	2.0916	0.0364743	0.159276
DENND1B	6.55098	-0.195523	0.28498	-0.686093	0.492654	0.703397
C1orf53	0.220181	1.17786	1.00567	1.17122	0.241509	NA
NEK7	4.95735	0.305887	0.310632	0.984723	0.32476	0.559166
PTPRC	106.752	0.613581	0.181695	3.37698	0.00073286	0.0133213
MIR181A1HG	1.1901	0.767091	0.462942	1.65699	0.0975212	NA
ZNF281	7.51865	-0.00651631	0.241907	-0.0269373	0.97851	0.989587
KIF14	0.0679303	0.849177	2.35863	0.36003	0.718825	NA
DDX59	2.98161	0.217964	0.334962	0.650712	0.515233	0.720857
CAMSAP2	0.427117	0.288243	0.524132	0.549944	0.582358	NA
KIF21B	2.37391	-0.185129	0.365537	-0.506457	0.612536	0.786086
TMEM9	1.63335	0.152887	0.373786	0.409023	0.682523	NA
PHLDA3	0.0708268	0.776458	0.950023	0.817304	0.413754	NA
CSRP1	2.43375	-0.515267	0.314786	-1.63688	0.101655	0.290001
RP11-134G8.7	0.110345	1.18136	1.46414	0.806859	0.419748	NA
RPS10P7	0.626319	0.795694	0.478438	1.66311	0.096291	NA
NAV1	0.280192	0.583714	0.5336	1.09392	0.273991	NA
IPO9-AS1	0.187118	1.16586	0.69428	1.67924	0.0931054	NA
IPO9	4.46016	0.533361	0.32007	1.66639	0.0956354	0.280078
SHISA4	0.035138	0.877572	2.69258	0.325923	0.744483	NA
TIMM17A	9.74513	0.0929405	0.179963	0.516442	0.605546	0.782146
RNPEP	2.42663	0.574018	0.340978	1.68345	0.0922886	0.273861
ELF3	0.0643018	0.492896	1.42732	0.345329	0.729847	NA
ARL8A	3.54691	-0.00754652	0.273741	-0.0275681	0.978007	0.989533
PTPN7	13.3987	-0.244254	0.206536	-1.18262	0.236958	0.467395
LGR6	0.0404403	0.91636	1.32603	0.691054	0.489532	NA
UBE2T	0.595063	0.877005	0.464034	1.88996	0.0587635	NA
PPP1R12B	1.85139	1.51878	0.433684	3.50204	0.000461718	NA
KDM5B	2.63217	0.491866	0.352075	1.39705	0.162399	0.376923
RABIF	5.50113	-0.18224	0.252654	-0.721303	0.470723	0.687932
KLHL12	1.40144	-0.109625	0.37324	-0.293712	0.768978	NA
ADIPOR1	7.17274	-0.401008	0.212114	-1.89053	0.0586869	0.210845
CYB5R1	2.31003	0.122326	0.353988	0.345565	0.72967	0.85612
TMEM183A	9.20319	0.0666294	0.199745	0.333572	0.738703	0.86295
RP11-134P9.3	0.472859	0.980388	0.482991	2.02983	0.0423742	NA
LINC01136	0.208488	0.939015	0.660359	1.42198	0.155033	NA
BTG2	110.168	-0.0086945	0.14552	-0.0597478	0.952356	0.978873
ATP2B4	3.6919	-0.0684854	0.388721	-0.176182	0.860151	0.935167
LAX1	5.24348	-0.131383	0.287691	-0.456681	0.647901	0.808067
ZC3H11A	12.1012	0.805766	0.238645	3.37642	0.000734361	0.0133213
ZBED6	5.81203	0.0810738	0.279826	0.28973	0.772023	0.885416
SNRPE	26.4848	-0.266621	0.110576	-2.4112	0.0159001	0.096857
SOX13	0.193586	0.932389	0.80452	1.15894	0.246482	NA
ETNK2	0.163371	0.657562	0.503064	1.30711	0.191175	NA
PPP1R15B	14.8045	0.51857	0.216931	2.39048	0.0168262	0.0998713
PIK3C2B	1.86679	0.80437	0.369795	2.17518	0.0296168	NA
MDM4	35.5906	0.705846	0.187518	3.76415	0.000167115	0.00465589
RP11-430C7.4	0.514174	0.781262	0.539599	1.44786	0.147658	NA
TMEM81	0.0886907	0.667888	0.714978	0.934138	0.350233	NA
RBBP5	5.9853	0.592058	0.2679	2.21	0.0271054	0.13377
DSTYK	3.95043	1.08224	0.354836	3.04997	0.00228866	0.0282089
NUAK2	3.08855	-0.0157517	0.276119	-0.0570466	0.954508	0.979064
MFSD4	0.178374	0.708777	0.577884	1.2265	0.220009	NA
ELK4	10.0419	0.0337517	0.221991	0.152041	0.879154	0.943807
SLC45A3	0.0854026	0.882692	3.14453	0.280707	0.778935	NA
NUCKS1	27.3736	0.487549	0.157748	3.09069	0.00199692	0.0259108
RAB7L1	12.811	-0.0475711	0.189225	-0.2514	0.801505	0.900773
SLC41A1	2.06681	0.495963	0.406809	1.21915	0.222786	0.45039
RP11-312O7.2	0.774762	0.33275	0.467356	0.711985	0.476474	NA
FAM72A	0.240934	0.453101	0.740803	0.611635	0.540779	NA
C1orf186	1.8319	0.596996	0.495266	1.2054	0.228048	NA
SRGAP2	2.35286	0.651061	0.382711	1.70118	0.0889086	0.267923
IKBKE	3.10107	1.02194	0.390575	2.6165	0.00888353	0.06997
RASSF5	13.9929	-0.247889	0.200625	-1.23558	0.216613	0.444732
EIF2D	4.33251	-0.0268424	0.247882	-0.108287	0.913768	0.959242
DYRK3	0.271599	0.567345	0.522626	1.08556	0.277672	NA
MAPKAPK2	5.46208	-0.602935	0.252442	-2.38841	0.0169215	0.100266
IL10	0.262304	-0.0237384	0.739266	-0.0321108	0.974384	NA
IL19	0.0158593	0.900143	3.63341	0.247741	0.804335	NA
IL20	0.0112737	0	4.77284	0	1	NA
IL24	0.222539	0.761919	0.63145	1.20662	0.227579	NA
FAIM3	16.5307	0.398061	0.187232	2.12603	0.0335007	0.151833
PIGR	0.292926	1.45091	3.45879	0.419484	0.674862	NA
YOD1	1.34162	0.618582	0.429296	1.44092	0.149606	NA
PFKFB2	0.527903	0.523721	0.475339	1.10178	0.270555	NA
CD55	62.3193	-0.124695	0.17288	-0.721284	0.470735	0.687932
CR1	2.34916	0.478247	0.419905	1.13894	0.254728	0.485957
CD46	11.8151	0.552535	0.23335	2.36784	0.0178924	0.104015
CD34	0.00143991	0	5.77147	0	1	NA
PLXNA2	0.18992	0.946003	0.760066	1.24463	0.213267	NA
MIR205HG	0.0987109	0.903611	5.77148	0.156565	0.875588	NA
LAMB3	0.0543585	1.04495	1.12502	0.92883	0.352977	NA
RP1-28O10.1	0.30324	0.514867	0.622474	0.827129	0.408164	NA
G0S2	3.53709	-0.951627	0.360453	-2.64009	0.0082884	0.0667348
TRAF3IP3	33.5157	0.719958	0.238626	3.0171	0.00255209	0.0300512
IRF6	0.0706983	1.0355	0.972628	1.06464	0.287037	NA
DIEXF	2.23992	0.775298	0.370269	2.09387	0.0362711	0.159276
RCOR3	4.53675	0.206785	0.31883	0.648574	0.516614	0.721756
TRAF5	10.9692	0.617326	0.272295	2.26713	0.0233826	0.121153
SLC30A1	1.92029	0.00857735	0.407353	0.0210563	0.983201	0.992722
NEK2	0.0524239	0.988357	1.81204	0.545439	0.585452	NA
LPGAT1	7.59243	0.372912	0.272983	1.36606	0.17192	0.389032
INTS7	0.948278	0.0546481	0.458692	0.119139	0.905165	NA
DTL	0.101716	1.10612	1.95972	0.564428	0.572463	NA
PPP2R5A	5.994	0.135191	0.259098	0.521776	0.601827	0.780345
TMEM206	1.39906	0.938785	0.40092	2.34158	0.0192023	NA
NENF	10.2022	0.0175364	0.162811	0.10771	0.914226	0.95945
ATF3	3.92634	0.329102	0.377106	0.872702	0.382825	0.611724
BATF3	0.186739	0.676694	0.669104	1.01134	0.311852	NA
NSL1	5.58188	0.0994374	0.2539	0.391641	0.695324	0.836668
TATDN3	2.44754	1.08179	0.318269	3.39897	0.000676408	0.0126939
FLVCR1-AS1	0.522287	0.89688	0.468998	1.91233	0.0558337	NA
FLVCR1	1.62263	0.550814	0.419024	1.31452	0.188672	NA
VASH2	0.0819155	0.801972	0.980406	0.818	0.413357	NA
ANGEL2	5.12882	0.299416	0.295792	1.01225	0.311418	0.545868
RPS6KC1	1.5495	0.421751	0.426577	0.988686	0.322817	NA
SMYD2	2.52576	-0.704109	0.350563	-2.00851	0.0445893	0.179521
PTPN14	0.169817	0.999606	0.593746	1.68356	0.0922671	NA
CENPF	1.61211	1.42381	0.491473	2.89703	0.00376715	NA
KCTD3	0.290244	0.784985	0.697287	1.12577	0.260263	NA
GPATCH2	8.08545	0.0497783	0.227148	0.219144	0.826538	0.916678
RRP15	7.7602	0.242263	0.201272	1.20366	0.228722	0.457258
LYPLAL1	6.74462	0.729671	0.229581	3.17828	0.00148152	0.0212892
EPRS	11.159	0.177021	0.225618	0.784605	0.432685	0.657173
BPNT1	1.40821	0.716626	0.405103	1.769	0.0768941	NA
IARS2	5.52756	0.354812	0.275579	1.28751	0.197915	0.420492
RAB3GAP2	6.4032	0.865528	0.284529	3.04197	0.00235034	0.0286345
2024-03-01	0.0280905	0	1.81136	0	1	NA
HLA-AS1	0.0104191	0.962918	5.77137	0.166844	0.867493	NA
HLX	0.174467	0.872023	0.960901	0.907506	0.364139	NA
DUSP10	6.53765	0.186235	0.259109	0.718753	0.472293	0.689255
TAF1A	0.969294	1.22275	0.431129	2.83616	0.00456594	NA
RP11-378J18.3	0.293312	0.688081	0.513131	1.34095	0.179938	NA
MIA3	10.3155	0.511554	0.247071	2.07047	0.038408	0.1649
RP11-378J18.8	0.285381	1.09655	0.568314	1.92948	0.0536713	NA
AIDA	9.78437	0.467845	0.219395	2.13244	0.0329709	0.150241
BROX	6.70195	0.246685	0.246252	1.00176	0.316459	0.550143
RP11-452F19.3	2.1527	0.841846	0.310327	2.71277	0.00667233	0.0575489
DISP1	0.298015	0.829347	0.548931	1.51084	0.130829	NA
TLR5	0.228858	0.730961	0.559966	1.30537	0.191768	NA
SUSD4	0.56299	0.540451	0.505104	1.06998	0.284629	NA
CAPN2	13.9806	-0.0810769	0.215681	-0.375911	0.706983	0.843377
TP53BP2	4.49163	0.38799	0.327589	1.18438	0.236263	0.466962
RP11-504P24.8	0.326615	0.579253	0.547406	1.05818	0.289975	NA
RP11-504P24.6	0.117814	1.02319	0.693483	1.47544	0.140095	NA
FBXO28	3.93352	0.473047	0.292606	1.61667	0.10595	0.295988
DEGS1	7.41863	-0.086793	0.197315	-0.43987	0.660031	0.816454
NVL	3.10547	0.927609	0.368785	2.51531	0.0118928	0.0824452
CNIH4	5.80764	0.202734	0.274523	0.738494	0.460214	0.680232
WDR26	7.53815	0.237347	0.257538	0.921603	0.356736	0.591197
CNIH3	0.279027	0.780603	0.515537	1.51415	0.129987	NA
DNAH14	0.151903	0.287284	0.644158	0.445983	0.655609	NA
LBR	12.3728	0.214275	0.222242	0.964151	0.33497	0.569704
SRP9	21.2103	-0.230328	0.156543	-1.47134	0.141198	0.347777
EPHX1	0.0909488	0.944897	0.728444	1.29714	0.194582	NA
RP11-285F7.2	1.53775	0.802113	0.429019	1.86965	0.0615331	NA
TMEM63A	8.64421	0.304083	0.316097	0.96199	0.336055	0.571022
PYCR2	3.96357	-0.0205774	0.312002	-0.0659528	0.947415	0.976786
SDE2	9.26229	0.42765	0.212709	2.01049	0.0443792	0.179142
H3F3A	229.139	-0.336087	0.0719103	-4.67369	2.95829e-06	0.000216248
ACBD3	10.9698	0.544037	0.213018	2.55395	0.0106509	0.0779345
LIN9	0.366233	0.60776	0.504276	1.20521	0.228121	NA
PARP1	23.0121	0.0306622	0.186674	0.164256	0.86953	0.940079
ITPKB	7.25	0.45034	0.319716	1.40856	0.158965	0.371757
ITPKB-AS1	1.46027	1.14076	0.433838	2.62945	0.0085522	NA
PSEN2	0.422928	0.743438	0.535184	1.38913	0.164795	NA
ADCK3	2.35473	0.753593	0.356592	2.11332	0.0345733	0.155042
CDC42BPA	0.091847	0.753567	0.780984	0.964894	0.334598	NA
ZNF678	2.53221	0.505828	0.450528	1.12275	0.261546	0.492977
SNAP47	3.1138	0.372818	0.314933	1.1838	0.236492	0.466962
JMJD4	1.50244	0.162397	0.403205	0.402765	0.687121	NA
ARF1	32.7161	-0.144183	0.117501	-1.22708	0.219793	0.447774
C1orf35	6.90657	0.476558	0.226143	2.10733	0.0350893	0.156534
MRPL55	10.5492	-0.193051	0.191383	-1.00872	0.313111	0.547374
GUK1	51.275	-0.452876	0.118835	-3.81096	0.000138426	0.00413407
GJC2	0.0468603	0.754978	1.36571	0.552808	0.580395	NA
IBA57	3.01375	0.423299	0.322933	1.31079	0.189928	0.411038
OBSCN	0.742173	0.588284	0.461242	1.27543	0.202156	NA
TRIM11	3.24743	0.576656	0.341706	1.68758	0.0914918	0.273216
RNF187	5.9832	0.369884	0.251605	1.4701	0.141536	0.348319
RHOU	0.266065	0.506968	0.57378	0.883558	0.376935	NA
RAB4A	11.4195	-0.0210566	0.178117	-0.118218	0.905895	0.955597
CCSAP	1.78896	0.423723	0.396723	1.06806	0.285495	NA
NUP133	1.52161	0.373221	0.414264	0.900926	0.367628	NA
ABCB10	0.945144	0.571966	0.446174	1.28194	0.199865	NA
TAF5L	1.73765	0.161166	0.371877	0.433385	0.664735	NA
URB2	0.847707	0.296984	0.427843	0.694144	0.487592	NA
GALNT2	4.05598	-0.1979	0.278244	-0.711245	0.476932	0.693012
COG2	3.35919	0.363166	0.349506	1.03908	0.298766	0.532157
C1orf198	0.345785	0.824363	0.529513	1.55683	0.11951	NA
TTC13	2.05754	0.483426	0.418081	1.1563	0.24756	0.478841
ARV1	1.45763	0.612532	0.42714	1.43403	0.151563	NA
FAM89A	1.01129	0.0956488	0.42881	0.223057	0.823492	NA
C1orf131	6.16401	0.282965	0.259435	1.0907	0.275407	0.507191
GNPAT	4.79841	0.177909	0.250012	0.7116	0.476713	0.693012
EXOC8	2.11128	0.302435	0.370868	0.81548	0.414798	0.641876
SPRTN	4.97548	0.0638461	0.244351	0.261289	0.79387	0.898253
EGLN1	4.49452	0.579406	0.293419	1.97467	0.0483054	0.187704
RP11-295G20.2	0.730145	0.388968	0.431651	0.901117	0.367526	NA
TSNAX	5.27134	0.771719	0.287891	2.68059	0.00734929	0.0611723
DISC1	0.583661	0.449708	0.480409	0.936093	0.349225	NA
SIPA1L2	0.121345	0.789204	0.829877	0.950989	0.34161	NA
MAP10	0.333161	0.537437	0.590707	0.90982	0.362917	NA
NTPCR	2.56109	1.26279	0.379754	3.32529	0.000883273	0.0147279
PCNXL2	2.69884	0.674062	0.412175	1.63538	0.10197	0.290265
MLK4	0.135935	0.587855	0.623328	0.943091	0.345635	NA
KCNK1	0.0376196	0	1.29261	0	1	NA
SLC35F3	0.0616493	0	1.24743	0	1	NA
RP5-827C21.6	0.0554477	0	1.54998	0	1	NA
RP5-827C21.4	2.28365	0.599579	0.382932	1.56576	0.117404	0.315084
COA6	4.19303	-0.237995	0.276537	-0.860626	0.389444	0.619002
TARBP1	3.31639	1.06456	0.372015	2.8616	0.00421505	0.0425489
IRF2BP2	20.4105	-0.257086	0.184786	-1.39126	0.164146	0.378952
RP11-443B7.1	0.0862364	0.856171	1.36978	0.625044	0.531942	NA
RP11-443B7.3	0.0161415	1.04855	3.88652	0.269791	0.787321	NA
TOMM20	42.025	-0.00632531	0.0961485	-0.0657869	0.947547	0.976786
RBM34	4.05191	0.737866	0.322221	2.28994	0.022025	0.117512
ARID4B	52.3366	0.679737	0.143051	4.7517	2.0171e-06	0.000164772
GGPS1	9.36839	-0.229772	0.220838	-1.04046	0.298128	0.531661
TBCE	0.765774	0.53342	0.44187	1.20719	0.227361	NA
B3GALNT2	1.86307	0.436101	0.418687	1.04159	0.2976	NA
LYST	15.4825	0.30609	0.206186	1.48453	0.137667	0.342452
NID1	0.0191151	0	1.97495	0	1	NA
GPR137B	1.36278	-0.179933	0.419295	-0.429133	0.667826	NA
ERO1LB	12.9114	0.1604	0.179475	0.893717	0.371473	0.602656
EDARADD	0.39055	0.732836	0.510899	1.43441	0.151456	NA
LGALS8	6.6445	0.438353	0.330947	1.32454	0.185323	0.405553
LGALS8-AS1	0.0580484	0.785015	1.25801	0.624014	0.532618	NA
RP11-385F5.4	0.0549974	0.925833	1.26932	0.729391	0.465763	NA
HEATR1	4.46013	0.725707	0.343177	2.11467	0.0344578	0.154746
MTR	6.05895	0.45101	0.326181	1.3827	0.166757	0.382469
GREM2	0.417049	0	0.55989	0	1	NA
FH	2.37972	-0.40545	0.296814	-1.36601	0.171937	0.389032
KMO	2.03881	1.15984	0.440968	2.63022	0.00853292	0.068033
OPN3	2.83882	-0.244323	0.269945	-0.905085	0.365421	0.599338
CHML	2.00936	0.210138	0.43327	0.485006	0.627672	0.796101
WDR64	0.0406863	0.905859	1.61735	0.560089	0.575419	NA
EXO1	0.0482364	0.747246	1.81814	0.410995	0.681076	NA
CEP170	5.23255	0.211163	0.280136	0.753788	0.450976	0.671356
SDCCAG8	9.82303	-0.0462197	0.245145	-0.18854	0.850453	0.929656
AKT3	4.25724	-0.0218244	0.339397	-0.0643035	0.948729	0.977458
ZBTB18	3.39242	0.387173	0.316185	1.22452	0.220757	0.448702
RP11-518L10.5	0.0355576	1.05011	2.69414	0.389775	0.696703	NA
ADSS	9.10942	-0.10422	0.233321	-0.446681	0.655106	0.812608
C1orf101	0.0744598	1.07377	1.01183	1.06122	0.28859	NA
DESI2	5.64182	-0.107037	0.230082	-0.465213	0.641779	0.804048
COX20	14.8209	-0.0666826	0.163561	-0.407692	0.6835	0.83039
HNRNPU-AS1	7.94056	0.120817	0.277566	0.435272	0.663365	0.819001
HNRNPU	50.1468	0.597045	0.160931	3.70994	0.00020731	0.00544686
RP11-156E8.1	0.524625	0.578642	0.451391	1.28191	0.199874	NA
EFCAB2	1.58753	0.21413	0.387456	0.552657	0.580499	NA
SMYD3	2.48493	-0.106855	0.305602	-0.349655	0.726597	0.854097
TFB2M	2.11102	0.382851	0.334575	1.14429	0.252503	0.483429
CNST	8.41017	0.401081	0.259684	1.5445	0.122468	0.322579
SCCPDH	1.41895	0.112526	0.411343	0.273558	0.784424	NA
AHCTF1	5.78172	0.764192	0.30465	2.50842	0.0121271	0.0834244
ZNF670	0.584249	0.435727	0.457189	0.953056	0.340562	NA
ZNF669	2.19976	1.1988	0.31415	3.81601	0.000135625	0.00408701
ZNF124	2.83838	0.592792	0.343221	1.72714	0.0841419	0.261305
RP11-488L18.10	3.18458	0.612472	0.342958	1.78585	0.0741229	0.242253
ZNF496	0.800737	0.266716	0.472319	0.564695	0.572281	NA
NLRP3	0.864197	0.205732	0.427477	0.481272	0.630323	NA
GCSAML	0.00540608	0	5.77146	0	1	NA
TRIM58	0.184251	0.243256	0.870219	0.279534	0.779835	NA
SH3BP5L	0.755823	0.182951	0.454459	0.402568	0.687266	NA
ZNF672	2.92146	0.046147	0.265213	0.174	0.861866	0.935659
ZNF692	2.81136	0.898147	0.427927	2.09883	0.0358317	0.158443
PGBD2	1.42492	-0.138314	0.388821	-0.355726	0.722046	NA
SH3YL1	11.6076	0.192517	0.286828	0.671195	0.502096	0.710957
ACP1	17.5946	-0.245694	0.140269	-1.75159	0.0798442	0.253
TMEM18	6.04235	-0.0866047	0.210135	-0.412138	0.680238	0.828704
AC116614.1	0.075408	0.785516	0.92664	0.847704	0.396603	NA
TPO	0.0679049	0	1.03813	0	1	NA
MYT1L	0.0459647	0	1.33656	0	1	NA
TSSC1	2.69996	0.0845395	0.318884	0.26511	0.790924	0.897384
TRAPPC12	2.52222	-0.441431	0.346741	-1.27309	0.202987	0.426845
TRAPPC12-AS1	0.099907	0.810832	0.938525	0.863943	0.387619	NA
ADI1	11.1483	-0.170191	0.188082	-0.904877	0.36553	0.599338
AC142528.1	0.504297	0.430798	0.45986	0.936804	0.34886	NA
AC108488.4	0.0635984	0.896442	1.1231	0.798183	0.424764	NA
RNASEH1	6.27101	-0.222468	0.203467	-1.09339	0.274225	0.506059
RNASEH1-AS1	1.73639	0.139239	0.341472	0.407762	0.683448	NA
RPS7	830.643	-0.111338	0.0343912	-3.23741	0.00120622	0.0183681
CMPK2	1.09968	-1.05884	0.549136	-1.92819	0.0538316	NA
RSAD2	0.985037	-0.888875	0.592088	-1.50126	0.13329	NA
RNF144A	0.942772	0.383643	0.467218	0.821122	0.411577	NA
AC092580.4	2.73267	0.843935	0.481799	1.75163	0.0798373	0.253
LINC00299	0.035619	0	1.36532	0	1	NA
AC011747.4	0.0732216	0.867863	4.4941	0.193111	0.846872	NA
ID2	22.4647	-0.490391	0.241776	-2.02828	0.0425314	0.174644
RP11-434B12.1	0.0531803	0.918732	1.05243	0.872966	0.382682	NA
KIDINS220	6.49113	0.615334	0.30311	2.03007	0.0423493	0.174187
MBOAT2	0.12203	0.839278	0.847826	0.989918	0.322214	NA
ASAP2	0.0468859	1.07474	1.95882	0.548668	0.583233	NA
ITGB1BP1	9.8199	-0.185507	0.206244	-0.899456	0.36841	0.601231
CPSF3	2.30831	0.174861	0.361838	0.483258	0.628912	0.797255
IAH1	11.1808	0.0758084	0.182875	0.414536	0.678482	0.827407
ADAM17	8.05037	0.354802	0.230821	1.53713	0.124261	0.324178
RP11-214N9.1	0.313178	0.703495	0.570593	1.23292	0.217606	NA
YWHAQ	24.3545	-0.176338	0.153946	-1.14545	0.252021	0.483429
TAF1B	2.61628	0.137431	0.348707	0.394116	0.693495	0.835595
RP11-95D17.1	0.525213	0.249162	0.510223	0.48834	0.625309	NA
GRHL1	0.34625	0.823062	0.583768	1.40991	0.158566	NA
RP11-254F7.2	0.870085	1.22496	0.442432	2.76871	0.00562791	NA
KLF11	4.13122	0.180393	0.303919	0.593557	0.552809	0.74669
RRM2	0.188218	0.686374	0.822626	0.834369	0.404073	NA
HPCAL1	8.14966	-0.172354	0.224873	-0.766451	0.443408	0.665044
ODC1	31.0906	-0.525773	0.157103	-3.34669	0.000817836	0.0142799
NOL10	2.71434	0.884723	0.347163	2.54843	0.0108208	0.078502
RN7SL832P	0.259353	0.807751	0.574898	1.40503	0.160012	NA
PDIA6	25.1817	-0.118508	0.213855	-0.55415	0.579476	0.765221
PQLC3	4.89329	-0.119056	0.29337	-0.405823	0.684873	0.8311
ROCK2	3.61126	0.729279	0.378288	1.92784	0.0538748	0.199577
E2F6	1.30585	0.0979195	0.402242	0.243434	0.807669	NA
LPIN1	12.4981	-0.339512	0.229742	-1.4778	0.139462	0.346061
TRIB2	6.52673	0.177466	0.333838	0.531595	0.595007	0.776
NBAS	3.10432	0.666535	0.36482	1.82702	0.0676961	0.230871
DDX1	6.95087	0.214644	0.229095	0.936922	0.348799	0.583751
FAM49A	6.17717	-0.327872	0.252869	-1.29661	0.194767	0.415957
SMC6	9.50003	0.50422	0.22707	2.22055	0.0263817	0.130986
GEN1	2.04196	0.677916	0.417345	1.62435	0.1043	0.294067
RDH14	5.28731	-0.372264	0.209717	-1.77508	0.0758841	0.246403
LINC00954	1.49964	0.522747	0.467878	1.11727	0.263878	NA
TTC32	3.94403	0.134158	0.31573	0.424914	0.670899	0.823071
RP11-79O8.1	0.125947	0.664326	0.66255	1.00268	0.316015	NA
WDR35	0.590411	0.701013	0.505007	1.38813	0.165098	NA
LAPTM4A	13.8476	0.108267	0.180473	0.599904	0.54857	0.744867
SDC1	0.0829697	0	5.77148	0	1	NA
PUM2	8.17899	0.804597	0.280591	2.86751	0.00413711	0.0421728
RHOB	5.42199	0.314631	0.285715	1.10121	0.270806	0.502767
HS1BP3	1.36722	0.241215	0.375199	0.6429	0.520289	NA
C2orf43	1.48519	-0.16181	0.432126	-0.374451	0.708069	NA
ATAD2B	6.27315	0.495432	0.317346	1.56117	0.118483	0.315911
UBXN2A	7.95966	0.395057	0.241044	1.63894	0.101225	0.289445
MFSD2B	0.0385425	0	1.4051	0	1	NA
C2orf44	0.530406	0.396226	0.528258	0.750061	0.453218	NA
FKBP1B	0.292073	1.04337	0.595544	1.75196	0.0797815	NA
SF3B14	23.7724	-0.131413	0.120052	-1.09464	0.273675	0.505768
FAM228B	2.10695	0.690663	0.367944	1.87709	0.060506	0.214964
TP53I3	0.615729	0.331299	0.552658	0.599465	0.548863	NA
ITSN2	27.7847	0.51049	0.171401	2.97835	0.00289809	0.0327165
NCOA1	5.89082	0.439192	0.302828	1.4503	0.146975	0.356477
PTRHD1	12.8556	-0.138807	0.146772	-0.945734	0.344284	0.579669
CENPO	0.2092	0.849947	0.59982	1.417	0.156482	NA
ADCY3	0.816198	-0.00378317	0.457892	-0.00826215	0.993408	NA
DNAJC27	2.79894	0.0946269	0.321822	0.294035	0.768731	0.883766
DNAJC27-AS1	0.27804	0.812592	0.553503	1.46809	0.14208	NA
POMC	2.30108	0.217348	0.335302	0.648214	0.516846	0.721756
RP11-458N5.1	0.257119	1.03402	0.564298	1.8324	0.0668923	NA
DNMT3A	3.48154	0.769894	0.370463	2.0782	0.0376914	0.162798
DTNB	1.33637	1.02122	0.416955	2.44923	0.014316	NA
ASXL2	4.52174	0.283711	0.317622	0.893234	0.371732	0.602656
KIF3C	0.16593	0.754231	0.57059	1.32185	0.186219	NA
RAB10	6.9779	-0.33994	0.277221	-1.22624	0.220107	0.448043
GAREML	0.137926	0.742556	0.658946	1.12688	0.259791	NA
HADHA	23.0556	0.177822	0.145695	1.2205	0.222274	0.449932
HADHB	7.38186	0.0619506	0.213133	0.290666	0.771307	0.884798
GPR113	0.314069	1.00227	0.564334	1.77603	0.0757279	NA
EPT1	1.99099	0.43613	0.387225	1.1263	0.26004	0.491018
SLC35F6	2.36622	-0.0220757	0.347069	-0.0636062	0.949284	0.977757
CENPA	0.0917338	0.862276	1.48601	0.580264	0.561736	NA
MAPRE3	0.638146	0.574401	0.478326	1.20086	0.229807	NA
TMEM214	2.61007	0.0323116	0.348864	0.0926193	0.926206	0.966594
AGBL5	0.512885	0.39876	0.465225	0.857134	0.391371	NA
OST4	115.411	-0.195659	0.101132	-1.93468	0.0530299	0.197538
EMILIN1	0.0185073	0	2.69123	0	1	NA
KHK	0.444625	0.649464	0.512848	1.26639	0.205375	NA
ABHD1	0.046035	0.978089	1.12396	0.870218	0.384181	NA
PREB	4.24104	0.0430532	0.31547	0.136473	0.891447	0.949391
SLC5A6	3.09332	0.827109	0.324614	2.54798	0.0108348	0.078502
ATRAID	14.4527	-0.201711	0.168896	-1.19429	0.232365	0.462288
CAD	1.20485	0.405185	0.443487	0.913634	0.360909	NA
UCN	0.319926	0.79352	0.519993	1.52602	0.127005	NA
MPV17	3.0164	0.143549	0.352408	0.407339	0.683759	0.830568
GTF3C2	1.96401	0.0774163	0.36065	0.214658	0.830034	0.918486
AC074117.10	0.49955	0.0891855	0.498334	0.178967	0.857963	NA
EIF2B4	4.21395	0.281399	0.305259	0.921835	0.356615	0.591128
SNX17	8.46589	-0.286613	0.203404	-1.40908	0.158811	0.371634
ZNF513	0.917967	0.461202	0.442944	1.04122	0.297773	NA
PPM1G	15.2979	-0.252919	0.177675	-1.42349	0.154595	0.365568
NRBP1	8.82968	0.147129	0.206587	0.71219	0.476347	0.692806
KRTCAP3	0.523089	0.658367	0.480118	1.37126	0.170293	NA
IFT172	0.46844	0.998797	0.496476	2.01177	0.0442438	NA
FNDC4	0.175767	0.758678	0.576314	1.31643	0.188029	NA
ZNF512	1.64892	0.636636	0.425732	1.49539	0.134812	NA
CCDC121	0.229141	0.757701	0.597242	1.26867	0.20456	NA
GPN1	4.02109	0.163842	0.278917	0.587422	0.55692	0.749634
SUPT7L	2.81455	0.144491	0.330337	0.437404	0.661818	0.818049
SLC4A1AP	3.63713	-0.0627503	0.301814	-0.20791	0.835299	0.920854
MRPL33	19.2276	0.064257	0.143538	0.447666	0.654394	0.812135
RBKS	0.7621	0.420305	0.420002	1.00072	0.316962	NA
BRE	2.88922	0.275011	0.30745	0.894491	0.371059	0.602656
FOSL2	11.5574	-0.244736	0.298589	-0.819642	0.41242	0.63955
RP11-373D23.3	0.269574	0.771866	0.508678	1.51739	0.129167	NA
PLB1	0.200055	0.531414	0.565898	0.939064	0.347698	NA
AC097724.3	0.0454204	0.85835	1.25092	0.686175	0.492603	NA
PPP1CB	55.3635	-0.400436	0.169771	-2.35868	0.01834	0.105373
SPDYA	0.630102	0.514542	0.493323	1.04301	0.296942	NA
TRMT61B	2.43155	0.90801	0.351617	2.58238	0.00981204	0.0737064
WDR43	12.1054	0.450832	0.190214	2.37013	0.0177817	0.103617
FAM179A	0.11583	0.668075	0.682695	0.978585	0.327785	NA
CLIP4	2.65679	-0.0124475	0.387793	-0.0320984	0.974394	0.98845
YPEL5	141.142	0.297199	0.174691	1.70128	0.0888903	0.267923
LBH	25.7243	0.933862	0.181014	5.15907	2.48175e-07	2.90838e-05
LCLAT1	2.2459	0.423241	0.422264	1.00231	0.316193	0.550059
EHD3	0.857247	0.770349	0.495712	1.55403	0.120178	NA
MEMO1	2.69183	0.146982	0.361141	0.406993	0.684013	0.83074
DPY30	8.29247	-0.211176	0.220785	-0.956477	0.338831	0.573759
CTC-336P14.1	0.00534052	0	5.77149	0	1	NA
SPAST	3.09852	0.297263	0.362358	0.820357	0.412012	0.639321
RP11-563N4.1	0.408967	0.808543	0.480987	1.68101	0.0927612	NA
SLC30A6	1.37367	0.627305	0.440195	1.42506	0.15414	NA
NLRC4	0.104438	0.88542	1.76859	0.500636	0.616627	NA
YIPF4	13.4015	-0.127542	0.227014	-0.561823	0.574236	0.761831
AL133245.2	0.452115	0.720626	0.511747	1.40817	0.159081	NA
BIRC6	13.8118	0.421778	0.245159	1.72043	0.0853547	0.262901
TTC27	1.07073	-0.166416	0.398749	-0.417346	0.676425	NA
RASGRP3	10.952	0.525059	0.291335	1.80225	0.0715057	0.238341
FAM98A	3.0034	-0.0924613	0.33459	-0.276342	0.782285	0.891987
CRIM1	0.348473	0.566356	0.580292	0.975986	0.329071	NA
AC007401.2	0.0246358	0	3.27082	0	1	NA
FEZ2	3.98221	0.19447	0.295862	0.6573	0.510988	0.717638
AC007382.1	0.234468	0.852748	0.691683	1.23286	0.217628	NA
STRN	3.19579	0.0867757	0.342761	0.253167	0.800139	0.90019
HEATR5B	3.42025	0.729894	0.376308	1.93962	0.0524261	0.196489
GPATCH11	4.31601	1.47805	0.350651	4.21516	2.496e-05	0.00118128
EIF2AK2	10.901	-0.0694021	0.28567	-0.242945	0.808048	0.90446
CEBPZ-AS1	7.23151	0.358255	0.230295	1.55564	0.119794	0.318028
CEBPZ	18.8708	0.265033	0.170499	1.55446	0.120076	0.318319
NDUFAF7	2.85899	0.444911	0.339815	1.30927	0.190442	0.411228
PRKD3	11.4701	0.672505	0.195827	3.43419	0.000594331	0.0117325
QPCT	0.674112	-0.179668	0.510126	-0.352204	0.724685	NA
AC006369.2	1.29012	0.950651	0.487752	1.94905	0.05129	NA
CDC42EP3	7.53552	-0.0386425	0.246134	-0.156998	0.875247	0.942112
LINC00211	0.0054226	0	5.77147	0	1	NA
RMDN2	0.639037	1.23378	0.476231	2.59071	0.00957769	NA
CYP1B1	1.22456	-0.0658201	0.505094	-0.130313	0.896319	NA
CYP1B1-AS1	0.00887401	0.896591	5.77147	0.155349	0.876546	NA
ATL2	2.51075	0.804454	0.343853	2.33953	0.0193083	0.109572
HNRNPLL	2.62069	0.857656	0.452783	1.89419	0.0582004	0.210222
GALM	3.31351	0.56372	0.400209	1.40856	0.158965	0.371757
SRSF7	108.608	0.379195	0.11356	3.33917	0.000840304	0.0144763
GEMIN6	1.65367	0.28292	0.385049	0.734764	0.462483	NA
DHX57	2.30457	0.476988	0.372179	1.28161	0.19998	0.422873
MORN2	0.735581	0.27306	0.430271	0.634624	0.525674	NA
SOS1	5.86883	-0.506725	0.347248	-1.45926	0.144494	0.35294
MAP4K3	0.995565	0.245737	0.430779	0.570447	0.568375	NA
AC007246.3	1.12477	0.270997	0.424904	0.637785	0.523614	NA
THUMPD2	2.91158	0.750972	0.320663	2.34194	0.019184	0.109136
SLC8A1-AS1	0.000963395	0	5.77147	0	1	NA
SLC8A1	0.211473	0.816479	0.621803	1.31308	0.189155	NA
EML4	35.884	0.239335	0.179538	1.33306	0.182511	0.402593
COX7A2L	31.3835	-0.267149	0.110273	-2.42261	0.0154095	0.0952035
MTA3	1.34945	0.661938	0.432534	1.53037	0.125925	NA
OXER1	0.016653	0.927541	4.99524	0.185685	0.852692	NA
HAAO	0.172932	0.886464	1.42977	0.620006	0.535254	NA
AC093609.1	0.18324	0.637684	0.624324	1.0214	0.307065	NA
THADA	3.52654	0.352724	0.366904	0.961352	0.336375	0.571304
ZFP36L2	199.311	-0.0525962	0.129454	-0.406293	0.684527	0.830818
AC010883.5	0.32162	0.742592	0.509694	1.45694	0.145134	NA
PLEKHH2	0.250182	0.666072	0.595656	1.11822	0.263475	NA
DYNC2LI1	0.620962	0.2507	0.428281	0.585364	0.558303	NA
LRPPRC	7.30094	0.443934	0.240928	1.8426	0.0653867	0.225901
PPM1B	9.82865	0.411962	0.21025	1.95939	0.0500675	0.192205
PREPL	4.79328	1.05439	0.326928	3.22515	0.00125909	0.0188181
CAMKMT	1.60123	0.567883	0.390157	1.45553	0.145524	NA
SRBD1	2.81855	0.784984	0.404466	1.94079	0.0522839	0.196489
PRKCE	2.32022	0.656147	0.335317	1.95679	0.0503717	0.192592
EPAS1	0.16489	0.677181	0.869578	0.778746	0.436129	NA
ATP6V1E2	1.93791	1.21308	0.391083	3.10184	0.00192323	0.0255381
RHOQ	9.16905	0.141	0.253853	0.555439	0.578595	0.764922
PIGF	2.52828	0.154169	0.366704	0.420418	0.67418	0.824768
CRIPT	6.64599	0.156339	0.234739	0.666013	0.505403	0.713322
SOCS5	1.26841	0.708339	0.419925	1.68682	0.0916376	NA
MCFD2	5.6979	0.060368	0.242345	0.249099	0.803284	0.902137
TTC7A	4.00563	0.738077	0.296096	2.49269	0.0126778	0.0854329
AC073283.7	0.0134362	0	3.44094	0	1	NA
CALM2	95.5434	0.225199	0.116323	1.93598	0.0528702	0.197241
BCYRN1	0.0344298	0	2.08315	0	1	NA
EPCAM	0.0510398	0.893033	5.77147	0.154732	0.877032	NA
MSH2	2.02869	0.50576	0.434697	1.16348	0.244635	0.476429
KCNK12	1.07365	0.169572	0.429664	0.394662	0.693093	NA
AC138655.1	0.0241139	0.862276	2.92474	0.294822	0.76813	NA
MSH6	4.26552	0.0113751	0.300913	0.0378019	0.969846	0.98611
FBXO11	7.99635	0.467577	0.255098	1.83293	0.0668126	0.228687
AC079807.2	0.157752	0.873247	0.602649	1.44901	0.147334	NA
FOXN2	5.28923	0.699865	0.299646	2.33564	0.0195099	0.110292
RP11-191L17.1	0.740483	1.24385	0.481766	2.58186	0.00982691	NA
PPP1R21	3.02572	0.99639	0.346506	2.87554	0.00403339	0.0414428
STON1	0.173583	0.614182	0.619943	0.990706	0.321829	NA
GPR75-ASB3	1.51346	1.22406	0.419406	2.91856	0.00351652	NA
CHAC2	1.72768	-0.691906	0.391385	-1.76784	0.0770876	NA
ERLEC1	15.7695	-0.0405705	0.232968	-0.174147	0.86175	0.935659
GPR75	0.0576061	0.952985	1.76216	0.540804	0.588642	NA
PSME4	7.21575	0.681883	0.275975	2.47081	0.0134808	0.0880004
ACYP2	5.10824	0.138501	0.252738	0.548001	0.583691	0.768026
SPTBN1	12.2218	0.0985658	0.269363	0.365922	0.714423	0.848058
EML6	1.8106	0.257129	0.515101	0.499182	0.617651	NA
RTN4	18.6041	0.0365499	0.171305	0.213362	0.831045	0.919108
CLHC1	0.46644	0.816218	0.554602	1.47172	0.141097	NA
RPS27A	1731.94	0.0825917	0.033802	2.44339	0.0145498	0.0922647
MTIF2	3.00004	0.451827	0.347771	1.29921	0.193872	0.415382
CCDC88A	8.21501	1.10386	0.397575	2.77648	0.00549516	0.0510423
AC012358.8	0.194452	0.818709	0.598737	1.36739	0.171503	NA
CCDC104	7.48722	-0.245137	0.275217	-0.890704	0.373088	0.604324
SMEK2	14.0707	0.488515	0.226455	2.15723	0.0309876	0.145564
RP11-554J4.1	1.47679	0.734089	0.427782	1.71603	0.0861557	NA
PNPT1	5.08099	-0.2854	0.297171	-0.960389	0.336859	0.571598
AC007743.1	0.0632367	0.757063	1.29711	0.583652	0.559454	NA
VRK2	2.55797	0.563322	0.311584	1.80793	0.070617	0.236232
FANCL	1.09096	0.641802	0.517898	1.23924	0.215255	NA
LINC01122	0.00171064	0	5.77148	0	1	NA
BCL11A	9.09821	0.776032	0.235306	3.29797	0.000973882	0.0157334
PAPOLG	3.34203	0.608727	0.352888	1.72499	0.0845301	0.262001
REL	84.4124	-0.322723	0.191304	-1.68697	0.0916095	0.273274
PUS10	1.1911	0.648129	0.436888	1.48351	0.137938	NA
PEX13	2.50742	0.0813535	0.344674	0.23603	0.813409	0.908945
KIAA1841	0.571492	0.955116	0.50645	1.8859	0.0593082	NA
C2orf74	0.397473	0.675731	0.530709	1.27326	0.202926	NA
AHSA2	7.26479	0.338818	0.308499	1.09828	0.272083	0.503813
USP34	21.7751	-0.0191653	0.201691	-0.0950228	0.924297	0.9655
RP11-355B11.2	0.647938	0.0967578	0.434909	0.222478	0.823942	NA
XPO1	11.3305	0.385197	0.271824	1.41708	0.15646	0.367901
FAM161A	0.898551	0.240328	0.440893	0.545093	0.58569	NA
CCT4	16.5687	0.165049	0.144032	1.14591	0.251831	0.483429
COMMD1	6.17203	-0.385208	0.195955	-1.9658	0.0493222	0.190155
B3GNT2	4.94017	0.839487	0.275966	3.04199	0.00235016	0.0286345
TMEM17	0.0201184	0.975283	3.54563	0.275066	0.783266	NA
EHBP1	2.17472	0.0508328	0.382829	0.132782	0.894366	0.950908
AC009501.4	0.283587	0.542957	0.513504	1.05736	0.290348	NA
WDPCP	1.30336	0.509638	0.420239	1.21273	0.225232	NA
MDH1	8.91387	-0.253453	0.187422	-1.35231	0.176275	0.394855
UGP2	12.5517	0.0182072	0.219251	0.0830427	0.933818	0.968992
VPS54	1.39663	0.159958	0.410533	0.389636	0.696806	NA
PELI1	13.4558	0.225816	0.202535	1.11495	0.264873	0.496586
AC074289.1	3.57038	0.716325	0.315727	2.26881	0.0232797	0.120796
LGALSL	0.135783	1.00958	0.76981	1.31146	0.189702	NA
RP11-568N6.1	1.01629	0.144716	0.448388	0.322747	0.746887	NA
AFTPH	9.04494	0.408439	0.245787	1.66176	0.0965614	0.281672
SERTAD2	3.51024	1.18558	0.308373	3.84463	0.000120733	0.00376105
AC007880.1	0.21845	1.54288	1.74972	0.881787	0.377892	NA
SLC1A4	2.21705	0.139825	0.390887	0.357713	0.720558	0.851044
CEP68	3.77548	0.402824	0.33	1.22068	0.222208	0.449932
RAB1A	12.2188	0.0916645	0.178155	0.51452	0.606888	0.782729
ACTR2	29.5719	0.202173	0.162028	1.24777	0.212116	0.439039
SPRED2	0.0955442	1.09641	0.703656	1.55816	0.119195	NA
MEIS1	0.0597822	0.84944	2.37883	0.357083	0.72103	NA
ETAA1	1.40163	0.675582	0.430972	1.56758	0.116979	NA
C1D	9.46778	0.225139	0.186212	1.20905	0.226645	0.454829
WDR92	1.37351	0.383871	0.432385	0.887801	0.374648	NA
PNO1	6.25712	0.17257	0.228533	0.755124	0.450175	0.67063
PPP3R1	5.53097	0.536067	0.277955	1.92861	0.0537797	0.199357
RP11-474G23.3	0.702048	0.370982	0.439544	0.844014	0.398661	NA
CNRIP1	0.00376962	0	5.77147	0	1	NA
PLEK	8.15944	-0.0877451	0.272183	-0.322375	0.747168	0.868093
FBXO48	1.34496	0.232393	0.398173	0.583647	0.559458	NA
APLF	0.711249	0.301436	0.477049	0.631877	0.527467	NA
ARHGAP25	11.1006	0.00336232	0.237189	0.0141757	0.98869	0.99572
AC097495.2	0.0458434	0.849243	1.96144	0.432968	0.665038	NA
GFPT1	3.92591	0.0234621	0.311056	0.0754272	0.939875	0.973269
NFU1	6.11112	-0.123996	0.229761	-0.539673	0.589423	0.77158
RP11-427H3.3	6.92767	1.05212	0.410325	2.56413	0.0103435	0.0768272
AAK1	20.9326	0.800093	0.313259	2.5541	0.0106464	0.0779345
ANXA4	3.34127	-0.0387892	0.28648	-0.135399	0.892296	0.949391
GMCL1	5.87592	0.285085	0.286721	0.994296	0.320079	0.554078
SNRNP27	11.171	0.372075	0.182009	2.04427	0.0409272	0.171296
MXD1	5.213	0.56357	0.275949	2.0423	0.0411219	0.171524
PCBP1-AS1	2.37553	0.268398	0.376127	0.713583	0.475485	0.69231
PCBP1	33.6902	-0.118531	0.127948	-0.926397	0.35424	0.588929
AC016700.5	0.168847	0.380104	0.913825	0.415948	0.677448	NA
C2orf42	0.802912	0.348934	0.431307	0.809015	0.418506	NA
TIA1	8.27689	0.789308	0.293549	2.68884	0.00716999	0.0605675
PCYOX1	1.41564	0.156302	0.425837	0.367046	0.713585	NA
SNRPG	39.1132	-0.283665	0.124296	-2.28216	0.0224796	0.118803
FAM136A	7.97542	-0.224083	0.215007	-1.04221	0.297313	0.530594
TGFA	0.0838627	0.798286	0.753072	1.06004	0.289127	NA
ANKRD53	0.025934	1.07767	4.73245	0.227719	0.819864	NA
TEX261	2.31581	0.0880041	0.340529	0.258434	0.796072	0.898253
NAGK	7.7033	0.14981	0.231619	0.646795	0.517765	0.722483
MCEE	2.32923	0.54221	0.357951	1.51476	0.129833	0.333207
MPHOSPH10	9.96137	-0.196457	0.220736	-0.890009	0.373461	0.604407
PAIP2B	1.05167	0.72527	0.406723	1.7832	0.0745533	NA
ZNF638	15.1762	0.706993	0.258345	2.73662	0.00620741	0.0552105
DYSF	0.0767424	0.91391	1.00619	0.908283	0.363729	NA
EXOC6B	1.04583	0.496883	0.451412	1.10073	0.271014	NA
SPR	0.054178	1.08206	3.47746	0.311165	0.755675	NA
SFXN5	0.813875	0.631001	0.457215	1.3801	0.167557	NA
RAB11FIP5	0.521365	0.319893	0.473872	0.675063	0.499636	NA
SMYD5	0.860296	0.550226	0.438186	1.25569	0.209228	NA
PRADC1	1.92162	-0.236958	0.370767	-0.639102	0.522757	0.727249
CCT7	11.1208	-0.163408	0.175094	-0.933261	0.350685	0.585791
FBXO41	0.665101	0.767704	0.458026	1.67611	0.0937159	NA
EGR4	1.71025	0.597098	0.562054	1.06235	0.288077	NA
ALMS1	1.99046	0.836917	0.426648	1.96161	0.0498077	0.191726
TPRKB	8.42498	-0.282534	0.195839	-1.44268	0.14911	0.358942
DUSP11	7.16489	0.332115	0.21983	1.51078	0.130844	0.334033
STAMBP	3.46601	0.767045	0.315869	2.42837	0.0151669	0.0945766
DGUOK	15.4323	-0.056518	0.155054	-0.364506	0.71548	0.84844
DGUOK-AS1	0.126374	0	0.594174	0	1	NA
TET3	1.34757	0.274197	0.439038	0.624541	0.532273	NA
BOLA3	5.41829	-0.347738	0.268956	-1.29292	0.19604	0.418312
BOLA3-AS1	0.165887	0.616682	0.571271	1.07949	0.280369	NA
MOB1A	25.5043	-0.0417794	0.146104	-0.285956	0.774912	0.886961
MTHFD2	11.5982	-0.560229	0.264885	-2.11499	0.034431	0.154719
SLC4A5	0.377175	0.922159	0.532587	1.73147	0.0833677	NA
DCTN1	3.71387	0.450734	0.34445	1.30856	0.190683	0.411228
C2orf81	0.25832	0.772709	0.691539	1.11738	0.263834	NA
WDR54	5.04178	-0.0987024	0.267139	-0.36948	0.71177	0.846758
RTKN	0.0449048	0.873749	2.40311	0.363591	0.716164	NA
INO80B	3.57867	0.620855	0.28583	2.17211	0.0298473	0.142144
WBP1	0.667604	0.106858	0.44036	0.24266	0.808269	NA
MOGS	3.20401	0.726616	0.316608	2.295	0.021733	0.116949
MRPL53	5.35984	0.0227542	0.287877	0.0790412	0.937	0.971608
CCDC142	0.806548	0.448873	0.468478	0.958152	0.337986	NA
TTC31	2.20806	0.35558	0.359007	0.990455	0.321952	0.556407
LBX2-AS1	0.0384371	0	3.58588	0	1	NA
PCGF1	1.6537	0.606677	0.386393	1.5701	0.116392	NA
AUP1	14.6879	-0.053179	0.164088	-0.324088	0.745871	0.867618
HTRA2	3.8731	-0.364979	0.260166	-1.40287	0.160655	0.374628
LOXL3	0.0137742	1.06813	3.95068	0.270367	0.786878	NA
DOK1	1.77098	-0.153364	0.338492	-0.453081	0.65049	NA
SEMA4F	0.265244	0.0390997	0.514868	0.0759413	0.939466	NA
HK2	0.669896	-0.0410338	0.464876	-0.0882683	0.929663	NA
POLE4	14.4873	-0.000970837	0.154344	-0.00629007	0.994981	0.997819
EVA1A	0.00470142	0	5.77142	0	1	NA
MRPL19	5.48089	-0.0207299	0.253236	-0.08186	0.934758	0.969695
GCFC2	2.75287	0.400827	0.322245	1.24386	0.213552	0.44114
RP11-342K6.4	0.0177194	0.820342	5.77146	0.142138	0.886971	NA
SUCLG1	8.5227	-0.168118	0.197643	-0.850615	0.394983	0.624133
DNAH6	0.171243	0.575996	0.54408	1.05866	0.289754	NA
TRABD2A	8.4812	0.484192	0.419321	1.15471	0.248211	0.479721
TMSB10	1041.68	0.0338193	0.104614	0.323276	0.746486	0.868037
KCMF1	7.36116	0.0781566	0.207565	0.37654	0.706516	0.843091
TCF7L1	0.0534387	0.937878	1.60237	0.585308	0.558341	NA
TGOLN2	21.2984	0.756353	0.20051	3.77215	0.000161848	0.00452624
RETSAT	1.01959	0.361841	0.428928	0.843595	0.398896	NA
ELMOD3	3.89932	0.0445457	0.314653	0.141571	0.887419	0.948477
CAPG	10.6769	-0.0445372	0.220335	-0.202134	0.839812	0.924319
MAT2A	11.7924	-0.399443	0.199476	-2.00246	0.0452348	0.180523
GGCX	3.48638	-0.033312	0.26625	-0.125116	0.900432	0.953182
VAMP8	22.9843	-0.0288027	0.157502	-0.182872	0.854898	0.932582
VAMP5	11.6021	-0.28575	0.19612	-1.45701	0.145112	0.353795
RNF181	11.6375	-0.131299	0.189375	-0.69333	0.488103	0.699333
TMEM150A	1.08497	-0.105221	0.372715	-0.282309	0.777706	NA
USP39	2.80328	0.703386	0.356337	1.97394	0.048389	0.187832
C2orf68	4.13786	-0.690566	0.29109	-2.37235	0.0176756	0.103398
GNLY	17.2399	-1.43521	0.284784	-5.03964	4.66413e-07	4.78268e-05
ATOH8	0.0285086	1.06792	2.88035	0.370761	0.710816	NA
ST3GAL5	4.05636	0.168671	0.273304	0.617153	0.537134	0.737111
AC105053.4	0.0505361	1.04044	2.10647	0.493928	0.621357	NA
POLR1A	1.01807	0.356748	0.444315	0.802917	0.422023	NA
PTCD3	8.01571	0.271036	0.264582	1.02439	0.305651	0.53999
IMMT	5.56918	-0.00212571	0.269519	-0.00788704	0.993707	0.997614
RP11-301O19.1	0.200785	0.909783	0.583531	1.5591	0.118973	NA
MRPL35	2.96502	-0.324099	0.343053	-0.944749	0.344787	0.579987
KDM3A	5.51508	0.808951	0.326824	2.47519	0.0133165	0.0875288
CHMP3	12.5345	0.0279877	0.170907	0.16376	0.86992	0.940079
RNF103	3.5855	-0.185676	0.305385	-0.608007	0.543183	0.740732
RMND5A	4.04619	0.494047	0.278508	1.77391	0.0760788	0.24668
CD8A	3.85535	-0.596406	0.4103	-1.45359	0.146061	0.354844
CD8B	5.35044	0.519917	0.440666	1.17984	0.238063	0.467825
PLGLB1	0.273307	0.833511	0.571435	1.45863	0.144668	NA
LINC00152	13.2137	-1.11769	0.309597	-3.61015	0.00030602	0.00706392
RP11-1399P15.1	1.83471	0.344834	0.474534	0.72668	0.467422	NA
RGPD2	0.95049	0.764277	0.576922	1.32475	0.185255	NA
KRCC1	6.26308	0.189262	0.261912	0.722616	0.469916	0.687284
THNSL2	0.110163	1.08819	1.15269	0.944045	0.345147	NA
EIF2AK3	6.19757	0.987723	0.296006	3.33683	0.000847394	0.0144763
AC062029.1	2.05156	1.08293	0.462488	2.34153	0.0192049	0.109136
RPIA	6.94452	0.0449936	0.216566	0.207759	0.835417	0.920854
MAL	14.1091	0.225399	0.404312	0.557489	0.577193	0.763695
MRPS5	8.91569	0.115432	0.232285	0.49694	0.619231	0.790724
ZNF514	1.0926	0.319132	0.48585	0.656853	0.511276	NA
ZNF2	0.587773	0.323767	0.555973	0.582343	0.560336	NA
FAHD2A	2.23853	-0.406582	0.347792	-1.16904	0.242389	0.473177
RP11-440D17.3	0.197628	1.20095	1.50055	0.800345	0.423511	NA
LINC00342	1.56142	0.791187	0.438675	1.80358	0.0712967	NA
ANKRD36C	18.3581	0.919263	0.27541	3.3378	0.000844436	0.0144763
GPAT2	0.308544	0.713868	0.557418	1.28067	0.20031	NA
DUSP2	84.5777	-0.0535842	0.242508	-0.220959	0.825125	0.915661
STARD7	8.89537	0.0137911	0.201152	0.0685607	0.945339	0.976145
TMEM127	2.39185	0.177998	0.356233	0.499668	0.617309	0.789257
CIAO1	5.35529	-0.00287559	0.284977	-0.0100906	0.991949	0.997149
SNRNP200	13.7493	0.520015	0.223202	2.32979	0.0198171	0.111093
AC021188.4	0.223805	0.730246	0.560757	1.30225	0.192831	NA
ITPRIPL1	0.445366	0.991065	0.515253	1.92345	0.0544231	NA
NCAPH	0.303392	0.797209	0.547997	1.45477	0.145733	NA
RP11-363D14.1	0.0220336	0.90809	2.39464	0.379217	0.704527	NA
ARID5A	28.4489	-0.827337	0.221319	-3.73822	0.000185329	0.00503046
KANSL3	2.27759	0.234004	0.375489	0.623199	0.533154	0.733967
LMAN2L	0.488206	0.627588	0.502272	1.2495	0.211482	NA
CNNM4	0.775414	0.943454	0.424277	2.22367	0.0261704	NA
CNNM3	1.35332	0.882607	0.429942	2.05285	0.0400872	NA
ANKRD23	0.375894	0.721272	0.655704	1.1	0.271334	NA
ANKRD39	4.41606	-0.0306587	0.289811	-0.105789	0.91575	0.96064
SEMA4C	0.749729	0.21853	0.467373	0.46757	0.640092	NA
FAM178B	0.0343137	0	1.15137	0	1	NA
FAHD2B	1.28176	0.160747	0.413454	0.38879	0.697432	NA
ANKRD36	23.5136	0.325687	0.247954	1.3135	0.189015	0.410562
AC159540.1	6.74542	0.48597	0.358435	1.35581	0.17516	0.39348
COX5B	50.2248	-0.209572	0.101887	-2.0569	0.0396958	0.168337
ACTR1B	4.88979	-0.0490212	0.267195	-0.183466	0.854433	0.932349
LINC01125	0.259014	0.448439	0.523707	0.856279	0.391843	NA
ZAP70	6.27753	0.802385	0.413522	1.94037	0.0523348	0.196489
TMEM131	6.36394	0.342361	0.278501	1.2293	0.21896	0.446708
VWA3B	0	NA	NA	NA	NA	NA
INPP4A	6.94453	0.0403039	0.346815	0.116212	0.907485	0.956044
COA5	4.23768	-0.130798	0.262414	-0.498441	0.618173	0.789888
UNC50	3.93607	-0.440397	0.259857	-1.69477	0.0901196	0.270229
MGAT4A	20.2769	-0.0336319	0.232627	-0.144574	0.885047	0.947458
AC109826.1	0.905986	0.162746	0.450365	0.361364	0.717827	NA
KIAA1211L	0.0581719	0	0.864478	0	1	NA
TSGA10	2.66327	0.248018	0.343224	0.722612	0.469918	0.687284
C2ORF15	0.531629	0.649895	0.455234	1.4276	0.153406	NA
LIPT1	1.16886	0.297711	0.417491	0.713096	0.475786	NA
MRPL30	0.0856517	0	0.866505	0	1	NA
MITD1	9.23122	0.401001	0.238642	1.68035	0.0928897	0.275092
LYG2	0.390031	0.568765	0.508997	1.11742	0.263814	NA
LYG1	0.10279	1.01756	1.00756	1.00993	0.31253	NA
TXNDC9	4.93272	-0.217134	0.248052	-0.875354	0.381382	0.61132
EIF5B	34.8935	-0.193887	0.155206	-1.24922	0.211583	0.438304
REV1	7.79881	0.522181	0.274715	1.90081	0.0573263	0.207878
AFF3	12.5593	0.746485	0.244849	3.04875	0.00229796	0.0282294
LONRF2	0.083063	0.813763	0.908321	0.895898	0.370307	NA
CHST10	0.513621	0.677399	0.532139	1.27297	0.203028	NA
PDCL3	7.22973	-0.115425	0.22788	-0.506519	0.612493	0.786086
NPAS2	0.064724	0.710722	0.799047	0.889463	0.373755	NA
RPL31	820.005	0.0548993	0.047587	1.15366	0.248639	0.479923
TBC1D8	0.0914046	0.85449	1.08035	0.790937	0.428981	NA
CNOT11	3.2632	-0.000937847	0.30455	-0.00307945	0.997543	0.999246
RNF149	13.3684	-0.221642	0.23509	-0.942796	0.345785	0.580608
MAP4K4	15.9769	0.407486	0.235202	1.73249	0.0831863	0.259689
IL1R2	0.0677527	0.878788	1.0504	0.836622	0.402805	NA
IL1R1	0.155488	0.381953	0.694423	0.550029	0.582299	NA
IL1RL2	0.0106474	0	5.77147	0	1	NA
IL18R1	0.87423	0.298759	0.493104	0.605874	0.544598	NA
IL18RAP	0.265782	0.531735	0.583632	0.91108	0.362253	NA
MFSD9	0.618494	0.39514	0.444648	0.888659	0.374186	NA
TMEM182	0.489723	0.746361	0.489424	1.52498	0.127265	NA
MRPS9	3.81669	0.107803	0.253338	0.425531	0.670449	0.822931
TGFBRAP1	1.53547	0.36585	0.383872	0.953051	0.340564	NA
RP11-332H14.2	2.39718	0.983326	0.378815	2.5958	0.00943714	0.0722763
C2orf49	6.40144	-0.213707	0.241125	-0.886291	0.375461	0.606866
FHL2	0.119193	0.670754	0.907213	0.739356	0.459691	NA
NCK2	11.1046	0.528668	0.249786	2.11648	0.034304	0.154431
C2orf40	0.341929	0.568491	0.462723	1.22858	0.219231	NA
UXS1	5.97196	-0.112371	0.281977	-0.398509	0.690255	0.833658
SULT1C4	0.00389634	0	5.77146	0	1	NA
GCC2	46.4993	-0.0693987	0.166478	-0.416865	0.676777	0.826029
LIMS1	15.0742	-0.329923	0.220421	-1.49678	0.13445	0.338131
RANBP2	16.3627	0.302336	0.23289	1.2982	0.19422	0.415382
CCDC138	1.51022	0.575801	0.417791	1.3782	0.168141	NA
[truncated: 21,457 more rows]
