# Supplementary material for: B cell-mediated antigen presentation promotes adverse cardiac remodeling in chronic heart failure
Source: Research Square preprint supplement (doi:10.21203/rs.3.rs-4536350/v1), 2024-06-24
Supplement: Supplementary file 2 [file e50071be21afc889faf3ec5a.pdf]

## Extended Data Figures/Tables

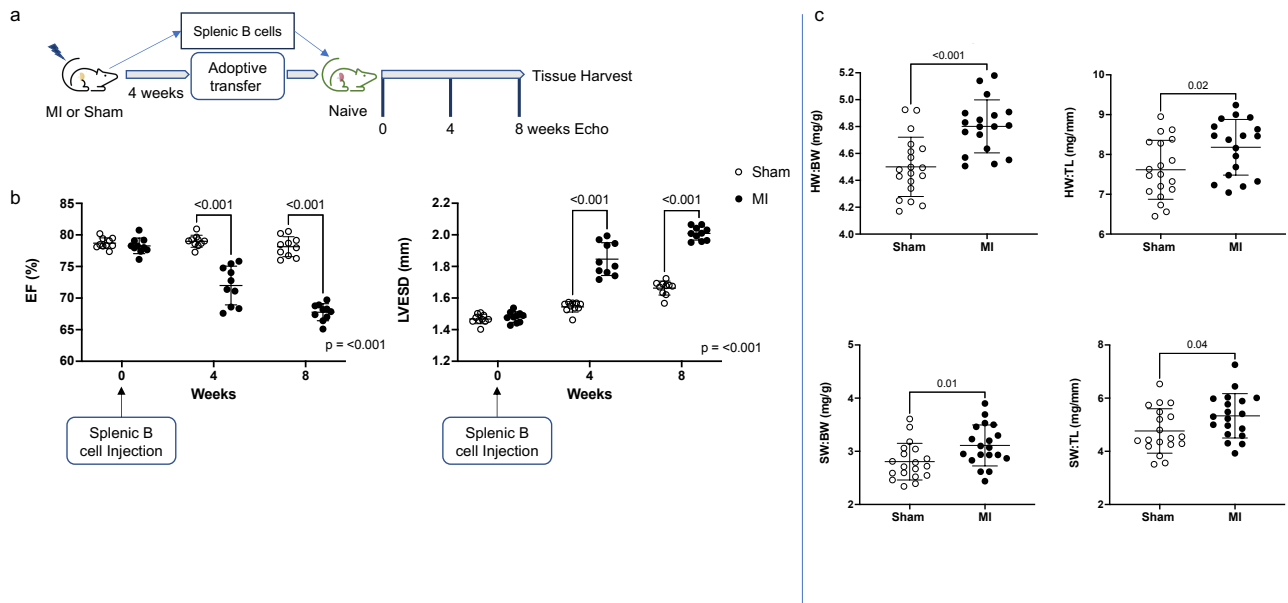

**Extended Data Figure 1. Combined analyses from independent splenic B cells adoptive transfer studies.** a) Schema for adoptive transfer of isolated B cells. b) Serial echocardiographic data of recipient mice over eight-week period post-adoptive transfer of isolated splenic B cells ( $n = 10$  per group). c) Combined gravimetric data of recipient mice normalized to body weight and tibia length ( $n = 21$  per group). Mean values  $\pm$  SD are represented. HW = heart weight. BW = body weight. SW = spleen weight. TL = tibia length.

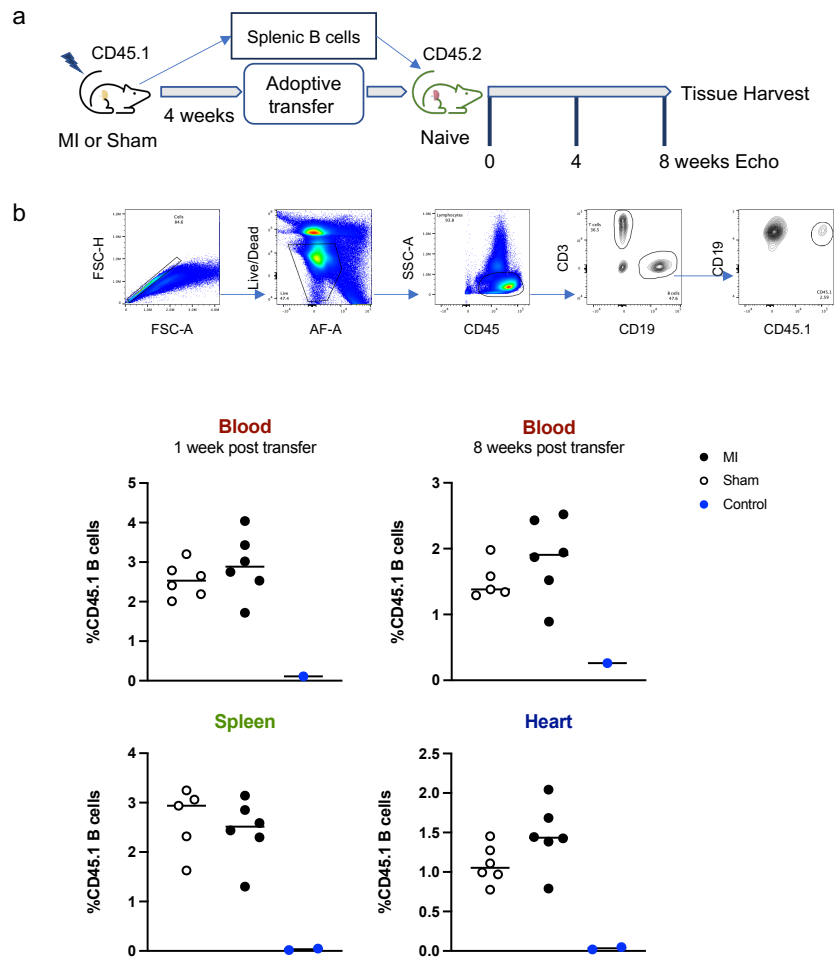

**Extended Data Figure 2. Quantification of CD45.1 donor-derived B cells in a second independent experiment.** a) Representative gating strategy b) Quantification of donor-derived CD45.1 B cells in recipients' peripheral blood, spleen, and hearts. Non-recipient C57BL/6J mice are included as an additional control. Median values are represented by a horizontal mark.

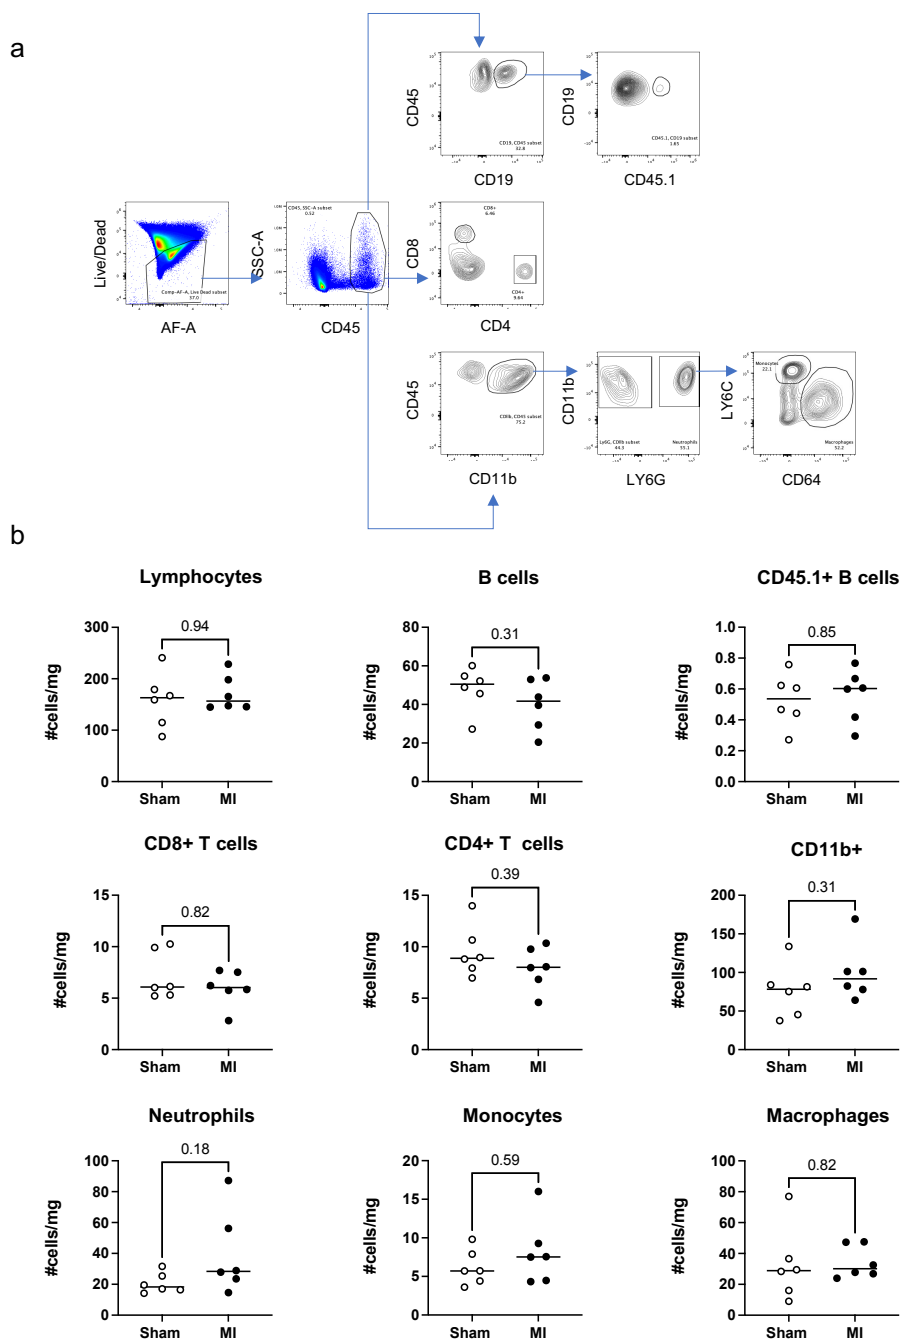

**Extended Data Figure 3. Adoptive transfer of splenic B cells from HF mice did not induce changes in immune cell populations in recipient hearts.** a) Representative gating strategy b) Cardiac immune cell populations of recipient mice eight weeks post-adoptive transfer. n = 6 male mice per group. Median values are represented by a horizontal mark.

| MZB cells | KEGG Term                                        | Count | %      | p-value  | FDR      |
|-----------|--------------------------------------------------|-------|--------|----------|----------|
| HF        | T cell receptor signaling pathway                | 5     | 0.0463 | 3.54E-05 | 3.29E-03 |
|           | Glycosaminoglycan biosynthesis - keratan sulfate | 2     | 0.1333 | 1.17E-03 | 3.62E-02 |
|           | Jak-STAT signaling pathway                       | 4     | 0.0258 | 1.98E-03 | 3.67E-02 |
|           | Purine metabolism                                | 4     | 0.0252 | 2.17E-03 | 3.67E-02 |

**Extended Data Table 1.** Remote MI does not result in dysregulation of antigen processing and presentation pathways in splenic marginal zone B (MZB) cells. KEGG pathway analysis of differentially expressed genes in splenic MZB cells from heart failure (HF) compared to sham mice ( $p < 0.05$ ). Pathways with FDR-adjusted  $p$ -value  $< 0.05$  are listed.

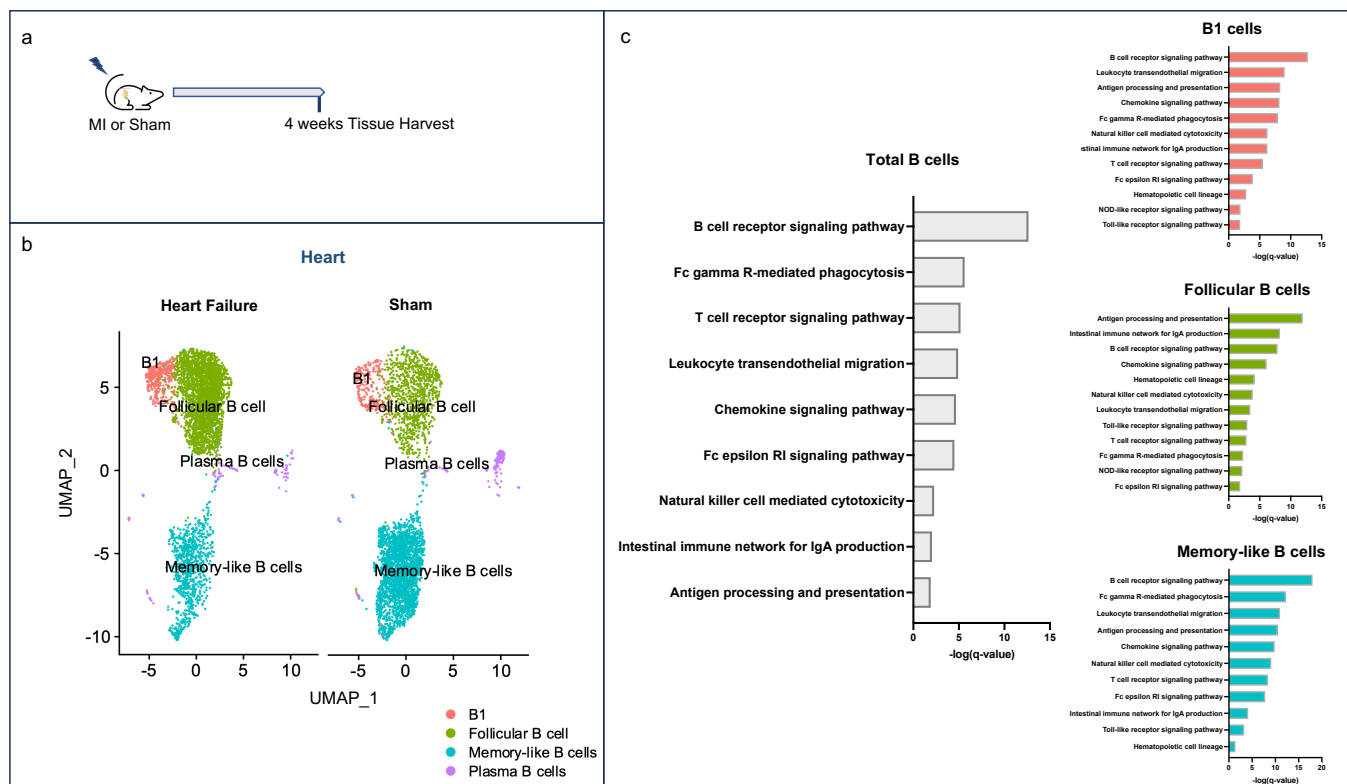

**Extended Data Figure 4. Remote myocardial injury results in dysregulation of antigen processing and presentation in cardiac B cells.** a) Schema for scRNA sequencing of cardiac B cells from mice four weeks post-MI (“heart failure”) or sham surgery. b) UMAP plots visualizing cardiac B cell sub-types. c) KEGG pathway analysis of top 500 differentially expressed genes in cardiac B cells from heart failure mice compared to sham mice ( $p < 0.05$ ). Immune system pathways for selected B cell subtypes with  $q\text{-value} < 0.05$  are shown.

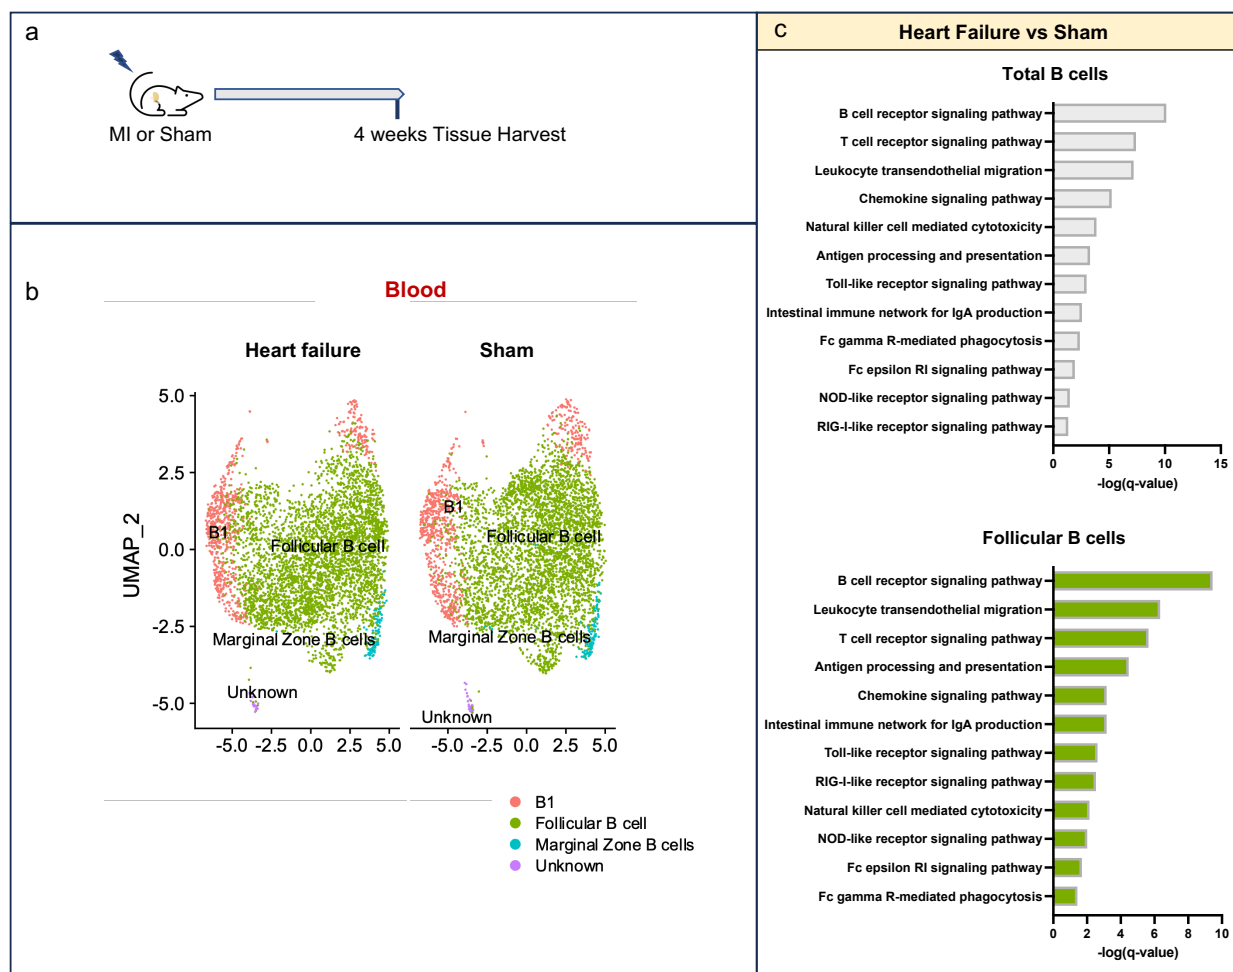

**Extended Data Figure 5. Remote myocardial injury results in chronic dysregulation of antigen processing and presentation in peripheral blood B cells.** a) Schema for scRNA sequencing of peripheral blood B cells from mice four weeks (“heart failure”) after permanent coronary ligation or sham surgery. b) UMAP plots visualizing peripheral blood B cell sub-types. c) KEGG pathway analysis of differentially expressed genes in peripheral blood B cells from HF mice compared to sham mice ( $p < 0.05$ ). Immune system pathways with  $q\text{-value} < 0.05$  are shown.

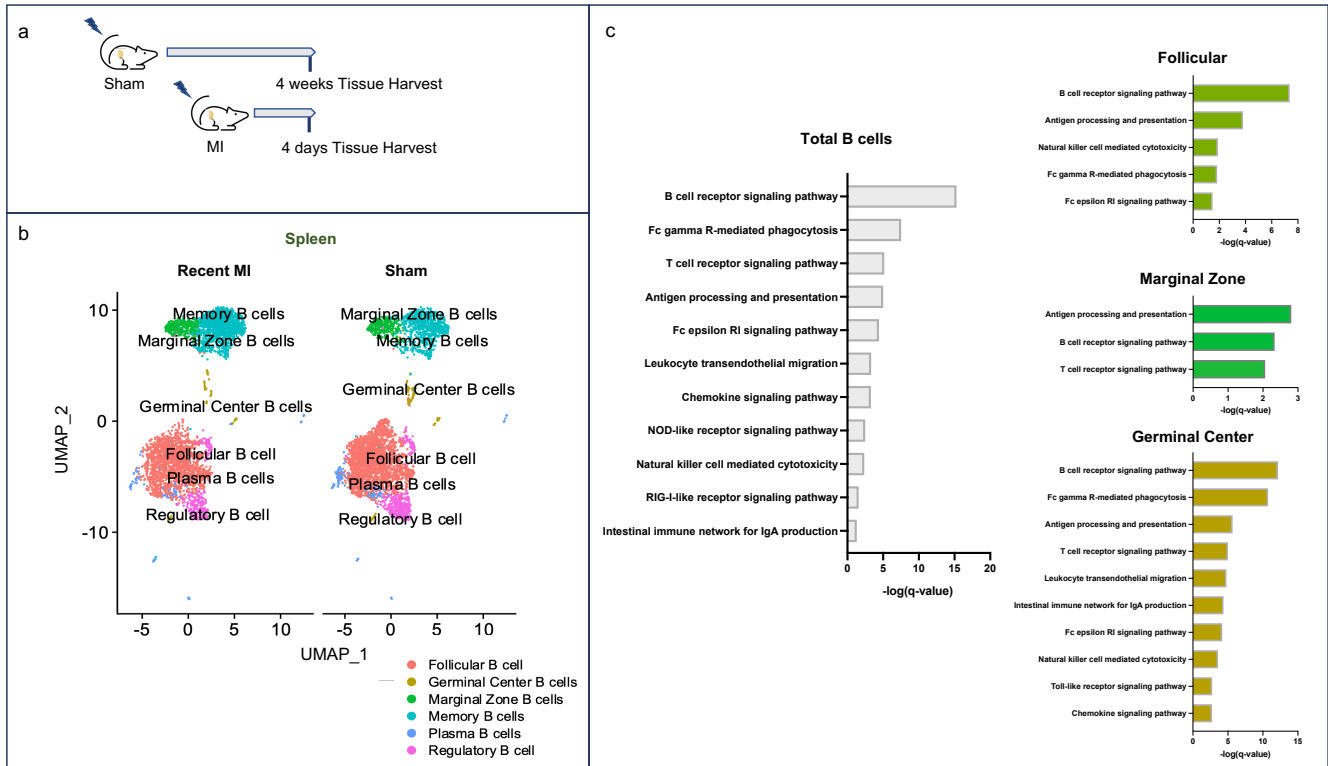

**Extended Data Figure 6. Acute myocardial injury results in dysregulation of antigen processing and presentation in splenic B cells.** a) Schema for single cell sequencing of B cells from mice four days after MI (“recent MI”) after permanent coronary ligation or four weeks after sham surgery. b) UMAP plots visualizing splenic B cell sub-types. c) KEGG pathway analysis of differentially expressed genes in splenic B cells from recent MI mice compared to sham mice ( $p < 0.05$ ). Immune system pathways for selected B cell subtypes with  $q\text{-value} < 0.05$  are shown.

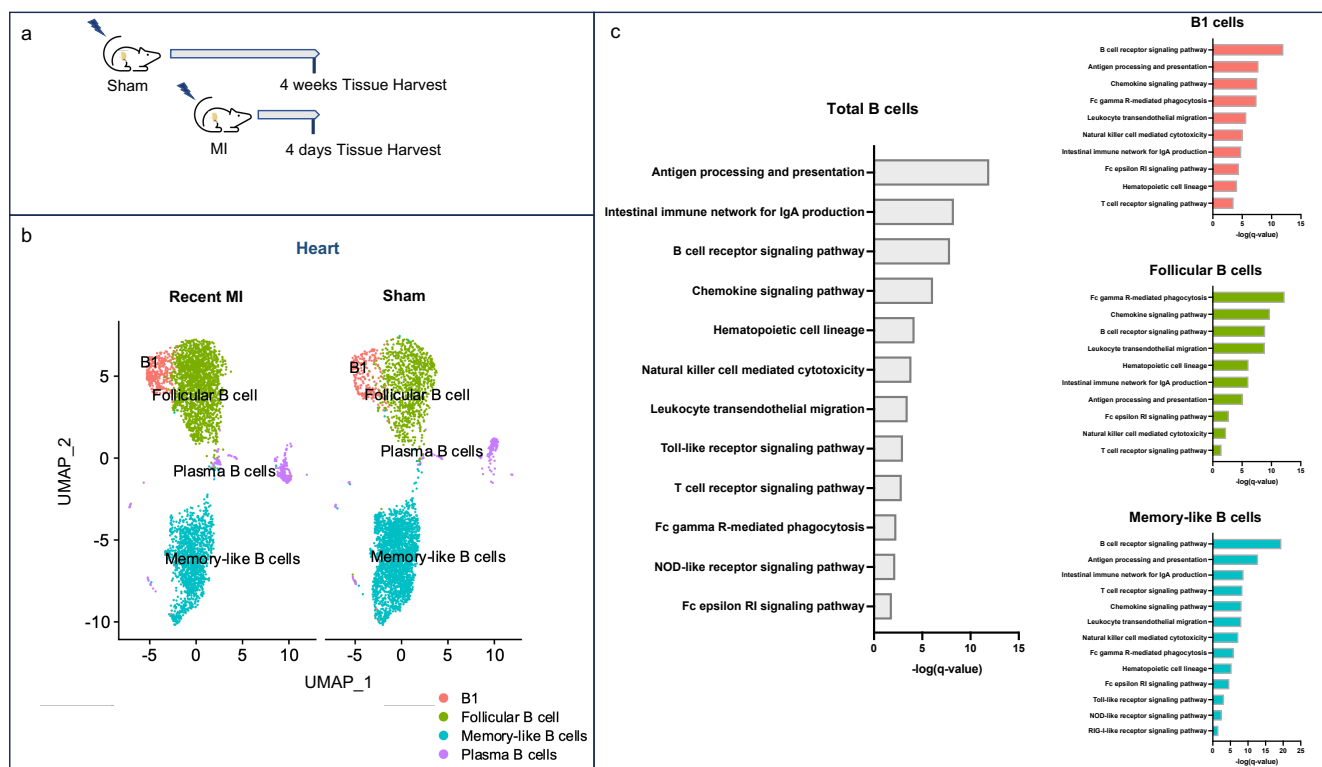

**Extended Data Figure 7. Acute myocardial injury results in dysregulation of antigen processing and presentation in cardiac B cells.** A) Schema for single cell sequencing of cardiac B cells from mice four days after MI (“recent MI”) after permanent coronary ligation or four weeks after sham surgery. B) UMAP plots visualizing cardiac B cell sub-types. C) KEGG pathway analysis of top 500 differentially expressed genes in cardiac B cells from recent MI mice compared to sham mice ( $p < 0.05$ ). Immune system pathways with  $q\text{-value} < 0.05$  are shown.



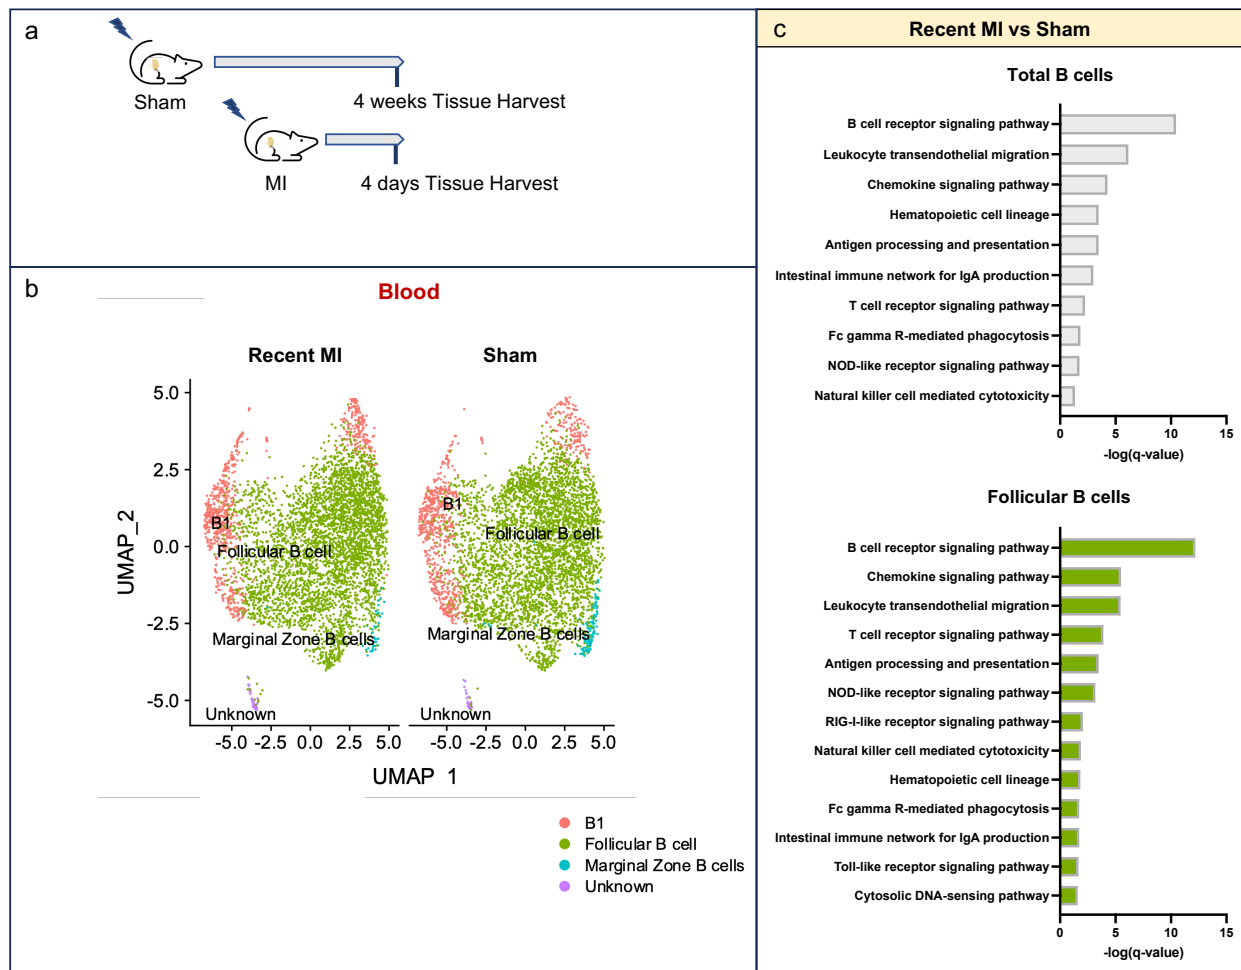

**Extended Data Figure 8. Acute myocardial injury results in dysregulation of antigen processing and presentation in peripheral blood B cells.** A) Schema for scRNA sequencing of peripheral blood B cells from mice four days after MI (“recent MI”) after permanent coronary ligation or four weeks after sham surgery. B) UMAP plots visualizing peripheral blood B cell sub-types. C) KEGG pathway analysis of differentially expressed genes in peripheral blood B cells from recent MI mice compared to sham mice ( $p < 0.05$ ). Immune system pathways with  $q\text{-value} < 0.05$  are shown.

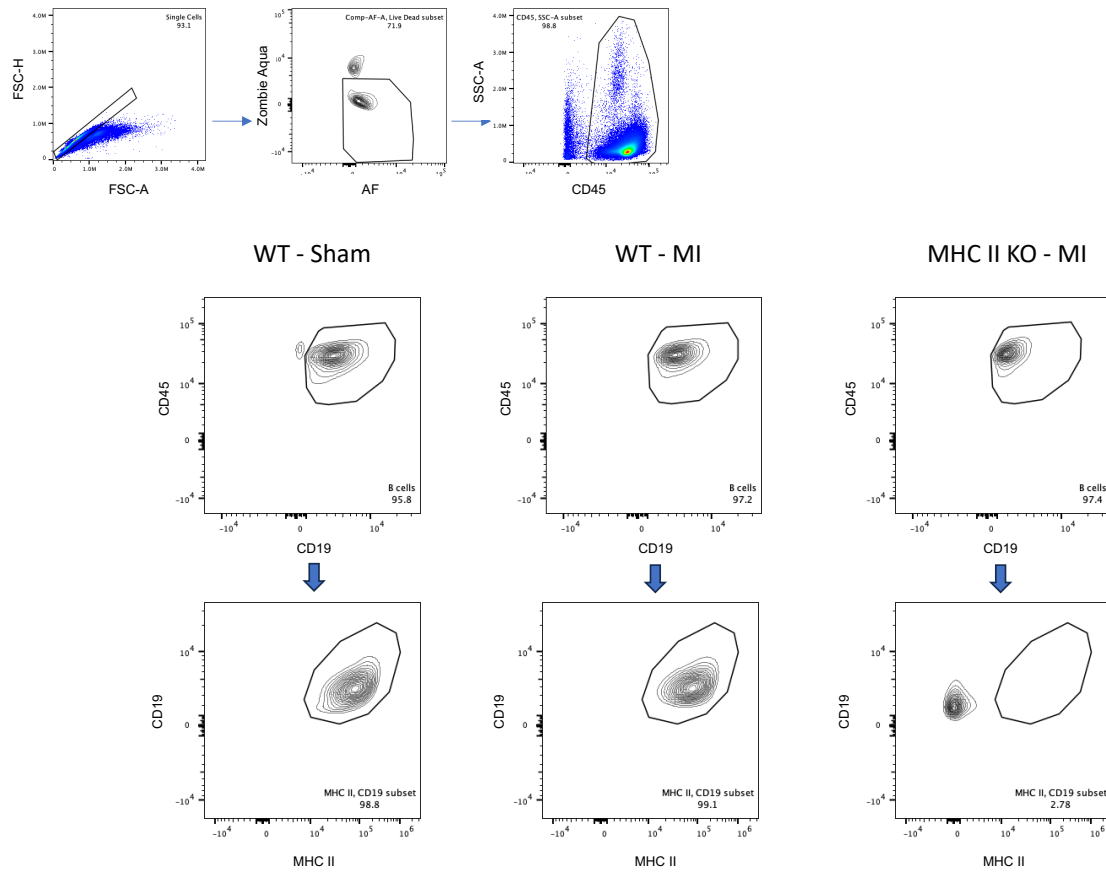

**Extended Data Figure 9. Confirmation of MHC class II deletion on splenic B cells in transgenic mouse model.** Splenic B cell isolation from *Cd19<sup>tm1</sup>(cre)Cgn/-H2-Ab1<sup>b-tm1</sup>Koni/b-tm1*Koni mice and wildtype mice prior to adoptive transfer (four weeks post-MI). Representative FACS plots showing MHC II expression in splenic B cells from the various experimental groups are reported.
